# Supplementary material for: Process- and product-related impurities in the ChAdOx1 nCov-19 vaccine
Source: eLife journal article supplement (doi:10.7554/elife.78513), 2022-07-04
Supplement: supp [file elife-78513-supp-v1.zip]

Archive with 14 entries (14 files):
- elife_poa_e78513_Figure_2_figure_supplement_1.pdf
- elife_poa_e78513_Figure_2_figure_supplement_2.pdf
- elife_poa_e78513_Figure_3_figure_supplement_1.pdf
- elife_poa_e78513_Figure_3_figure_supplement_2.pdf
- elife_poa_e78513_Figure_4_figure_supplement_1.pdf
- elife_poa_e78513_Figure_1_source_data_1.pdf
- elife_poa_e78513_Figure_1_source_data_2.pdf
- elife_poa_e78513_Figure_2_source_data_1.xlsx
- elife_poa_e78513_Figure_3_source_data_1.xlsx
- elife_poa_e78513_Figure_3_source_data_2.pdf
- elife_poa_e78513_Figure_3_source_data_3.pdf
- elife_poa_e78513_Figure_4_source_data_1.xlsx
- elife_poa_e78513_Figure_4_source_data_2.pdf
- elife_poa_e78513_Figure_4_source_data_3.pdf
