# Supplementary material for: Process- and product-related impurities in the ChAdOx1 nCov-19 vaccine
Source: eLife journal article supplement (doi:10.7554/elife.78513), 2022-07-04
Supplement: supp [file elife-78513-supp-v1.zip › elife_poa_e78513_Figure_1_source_data_1.pdf]

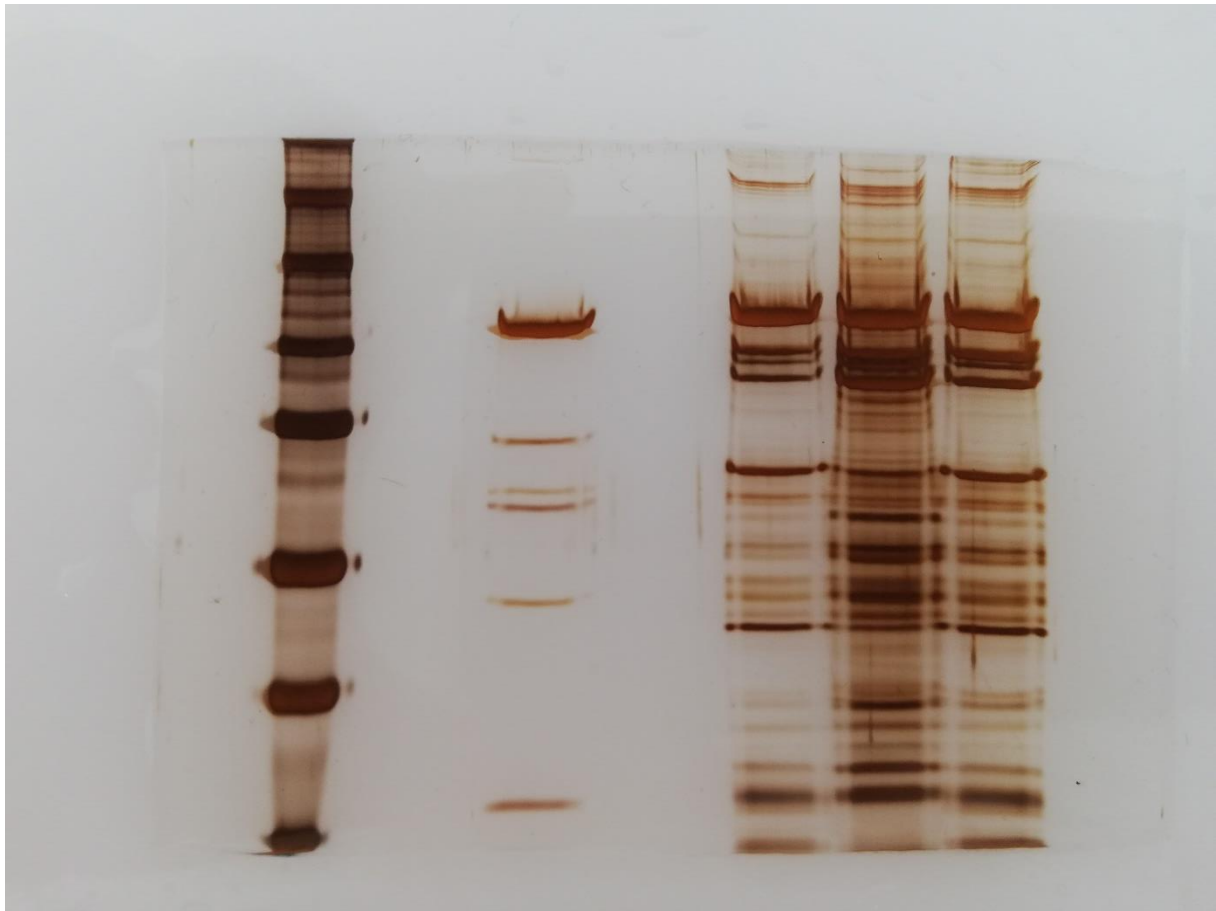

**Figure 1 – source data 1\_Original file of the full raw unedited gel: Protein staining of HAdV-C5-EGFP and three ChAdOx1 nCoV-19 vaccine lots.**  $3 \times 10^9$  adenoviral vector particles were separated by SDS-PAGE under denaturing and reducing conditions. Proteins were visualized by silver staining. Lane 1: Reference protein marker; lane 2: HAdV-5-EGFP; lane 3-5: three different vaccine lots (ABV4678, ABV5811, ABV7764) of ChAdOx1, produced by the manufacturer.
