# Supplementary material for: Process- and product-related impurities in the ChAdOx1 nCov-19 vaccine
Source: eLife journal article supplement (doi:10.7554/elife.78513), 2022-07-04
Supplement: supp [file elife-78513-supp-v1.zip › elife_poa_e78513_Figure_2_source_data_1.xlsx]

## Sheet: in-sol ABV4678,ABV5811,ABV7764
				ABV4678			ABV5811			ABV7764
Protein IDs	Protein names	Gene names	Fasta headers	Intensity ABV4678	Rank ABV4678	% Intensity ABV4678	Intensity ABV5811	Rank ABV5811	% Intensity ABV5811	Intensity ABV7764	Rank ABV7764	% Intensity ABV7764	Number of proteins	Peptides	Unique peptides	Sequence coverage [%]	Mol. weight [kDa]	Sequence length	Q-value	Score	Intensity	MS/MS count	Only identified by site	Potential contaminant	id
P08238;Q58FF7	Heat shock protein HSP 90-beta	HSP90AB1	sp|P08238|HS90B_HUMAN Heat shock protein HSP 90-beta OS=Homo sapiens OX=9606 GN=HSP90AB1 PE=1 SV=4	509020000	5	5.46625	21470000000	1	9.39119	853500000	3	6.56278	2	93	62	88.1	83.263	724	0	323.31	22832000000	529			601
lcl|NC_017825.1_prot_YP_006272966.1_18	100K	db_xref=GeneID:12657121	lcl|NC_017825.1_prot_YP_006272966.1_18 [locus_tag=YOE_gp18] [db_xref=GeneID:12657121] [protein=100kDa] [protein_id=YP_006272966.1] [location=23419..25827] [gbkey=CDS]	605820000	3	6.50576	15467000000	2	6.76542	1529200000	1	11.7584	1	82	82	80.3	88.74	802	0	323.31	17602000000	658			457
lcl|NC_017825.1_prot_YP_006272963.1_15	Hexon	db_xref=GeneID:12657118	lcl|NC_017825.1_prot_YP_006272963.1_15 [locus_tag=YOE_gp15] [db_xref=GeneID:12657118] [protein=hexon] [protein_id=YP_006272963.1] [location=18302..21130] [gbkey=CDS]	430730000	8	4.62551	13836000000	3	6.052	232940000	15	1.79114	1	76	76	83.7	106.03	942	0	323.31	14500000000	498			454
P55072;C9IZA5;C9JUP7	Transitional endoplasmic reticulum ATPase	VCP	sp|P55072|TERA_HUMAN Transitional endoplasmic reticulum ATPase OS=Homo sapiens OX=9606 GN=VCP PE=1 SV=4	300080000	9	3.22249	9666900000	4	4.2284	348560000	10	2.68017	3	93	93	93.2	89.321	806	0	323.31	10316000000	442			823
P07900;G3V2J8;Q58FG0;Q14568;Q58FG1	Heat shock protein HSP 90-alpha	HSP90AA1	sp|P07900|HS90A_HUMAN Heat shock protein HSP 90-alpha OS=Homo sapiens OX=9606 GN=HSP90AA1 PE=1 SV=5	204890000	12	2.20027	9094100000	5	3.97785	524120000	6	4.03009	5	91	66	81	84.659	732	0	323.31	9823100000	404			599
P08670;B0YJC4;B0YJC5;A0A1B0GTT5;H7C5W5;P41219;P17661;A0A1B0GVG8;F8W835;E7EMV2;E7ESP9;P07197;CON__Q9H552;P12036	Vimentin	VIM	sp|P08670|VIME_HUMAN Vimentin OS=Homo sapiens OX=9606 GN=VIM PE=1 SV=4;tr|B0YJC4|B0YJC4_HUMAN Vimentin OS=Homo sapiens OX=9606 GN=VIM PE=1 SV=1;tr|B0YJC5|B0YJC5_HUMAN Vimentin OS=Homo sapiens OX=9606 GN=VIM PE=1 SV=1	154990000	16	1.6644	7376200000	6	3.22642	441740000	8	3.39665	14	58	55	79.2	53.651	466	0	323.31	7972900000	303			603
P68371;M0R2D3;M0QYM7;M0R042;M0R2T4;A0A075B724	Tubulin beta-4B chain	TUBB4B	sp|P68371|TBB4B_HUMAN Tubulin beta-4B chain OS=Homo sapiens OX=9606 GN=TUBB4B PE=1 SV=1	114740000	19	1.23217	6456100000	7	2.82396	290750000	13	2.23565	6	38	2	78.7	49.83	445	0	323.31	6861600000	201			889
P68363;C9JDS9	Tubulin alpha-1B chain	TUBA1B	sp|P68363|TBA1B_HUMAN Tubulin alpha-1B chain OS=Homo sapiens OX=9606 GN=TUBA1B PE=1 SV=1	114550000	20	1.23013	5916700000	8	2.58802	237950000	14	1.82966	2	41	0	84.9	50.151	451	0	323.31	6269200000	241			887
lcl|NC_017825.1_prot_YP_006272957.1_9	IIIa	db_xref=GeneID:12657143	lcl|NC_017825.1_prot_YP_006272957.1_9 [locus_tag=YOE_gp09] [db_xref=GeneID:12657143] [protein=pIIIa] [protein_id=YP_006272957.1] [location=12041..13810] [gbkey=CDS]	761000000	2	8.17221	5459200000	9	2.38791	794050000	4	6.10565	1	56	56	83.9	65.884	589	0	323.31	7014200000	367			448
lcl|NC_017825.1_prot_YP_006272959.1_11	VII	db_xref=GeneID:12657145	lcl|NC_017825.1_prot_YP_006272959.1_11 [locus_tag=YOE_gp11] [db_xref=GeneID:12657145] [protein=pVII] [protein_id=YP_006272959.1] [location=15493..16074] [gbkey=CDS]	831920000	1	8.9338	5412800000	10	2.36761	1205100000	2	9.26632	1	20	20	55.4	21.265	193	0	323.31	7449800000	219			450
P62258;B4DJF2;I3L3T1;K7EIT4;K7EM20;I3L0W5;P31947	14-3-3 protein epsilon	YWHAE	sp|P62258|1433E_HUMAN 14-3-3 protein epsilon OS=Homo sapiens OX=9606 GN=YWHAE PE=1 SV=1	62686000	29	0.673171	5246800000	11	2.295	92686000	26	0.712686	7	32	31	90.6	29.174	255	0	323.31	5402200000	234			855
lcl|NC_017825.1_prot_YP_006272962.1_14	VI	db_xref=GeneID:12657117	lcl|NC_017825.1_prot_YP_006272962.1_14 [locus_tag=YOE_gp14] [db_xref=GeneID:12657117] [protein=pVI] [protein_id=YP_006272962.1] [location=17470..18201] [gbkey=CDS]	450500000	7	4.83782	4504400000	12	1.97027	429980000	9	3.30623	1	29	29	98.4	26.267	243	0	323.31	5384900000	192			453
lcl|NC_017825.1_prot_YP_006272960.1_12;REV__lcl|NC_017825.1_prot_YP_006272960.1_12	V	db_xref=GeneID:12657115	lcl|NC_017825.1_prot_YP_006272960.1_12 [locus_tag=YOE_gp12] [db_xref=GeneID:12657115] [protein=pV] [protein_id=YP_006272960.1] [location=16119..17141] [gbkey=CDS]	547720000	4	5.88184	3951000000	13	1.72821	458080000	7	3.52229	2	40	40	79.1	38.899	340	0	323.31	4956800000	222			451
P14625;Q96GW1;A0A1W2PRR1;H0YIV0;Q58FF3;F8W026	Endoplasmin	HSP90B1	sp|P14625|ENPL_HUMAN Endoplasmin OS=Homo sapiens OX=9606 GN=HSP90B1 PE=1 SV=1	74924000	24	0.804592	3787700000	14	1.65678	117170000	23	0.90095	6	65	63	71.6	92.468	803	0	323.31	3979700000	284			644
lcl|NC_017825.1_prot_YP_006272965.1_17	DBP	db_xref=GeneID:12657120	lcl|NC_017825.1_prot_YP_006272965.1_17 [locus_tag=YOE_gp17] [db_xref=GeneID:12657120] [protein=DNA binding protein] [protein_id=YP_006272965.1] [location=complement(21852..23390)] [gbkey=CDS]	63871000	27	0.685896	3567500000	15	1.56046	143940000	19	1.10679	1	48	48	80.3	57.286	512	0	323.31	3775300000	209			456
lcl|NC_017825.1_prot_YP_006272958.1_10	Penton base	db_xref=GeneID:12657144	lcl|NC_017825.1_prot_YP_006272958.1_10 [locus_tag=YOE_gp10] [db_xref=GeneID:12657144] [protein=penton] [protein_id=YP_006272958.1] [location=13891..15489] [gbkey=CDS]	455680000	6	4.89345	3421200000	16	1.49647	790330000	5	6.07705	1	43	43	73.9	59.479	532	0	323.31	4667200000	304			449
lcl|NC_017825.1_prot_YP_006272956.1_8	52/55kDa	db_xref=GeneID:12657142	lcl|NC_017825.1_prot_YP_006272956.1_8 [locus_tag=YOE_gp08] [db_xref=GeneID:12657142] [protein=52/55kDa] [protein_id=YP_006272956.1] [location=10827..12017] [gbkey=CDS]	228630000	10	2.45521	3115200000	17	1.36262	293460000	12	2.25649	1	36	36	68.4	44.84	396	0	323.31	3637200000	185			447
O43707;F5GXS2;H7C144;K7EP19;A0A494C060;D6RH00	Alpha-actinin-4	ACTN4	sp|O43707|ACTN4_HUMAN Alpha-actinin-4 OS=Homo sapiens OX=9606 GN=ACTN4 PE=1 SV=2;tr|F5GXS2|F5GXS2_HUMAN Alpha-actinin-4 OS=Homo sapiens OX=9606 GN=ACTN4 PE=1 SV=2	210330000	11	2.25869	3087500000	18	1.3505	321420000	11	2.47148	6	99	58	85	104.85	911	0	323.31	3619300000	384			516
P27797;K7EJB9;K7EL50	Calreticulin	CALR	sp|P27797|CALR_HUMAN Calreticulin OS=Homo sapiens OX=9606 GN=CALR PE=1 SV=1;tr|K7EJB9|K7EJB9_HUMAN Calreticulin (Fragment) OS=Homo sapiens OX=9606 GN=CALR PE=1 SV=1	16326000	60	0.175321	2760500000	19	1.20747	12040000	91	0.0925787	3	22	22	75.5	48.141	417	0	323.31	2788900000	108			701
Q08380;K7EP36;K7ESM3;K7EKQ5;K7ERZ6;K7EJD3;K7ES75;K7EN99;K7EJY8;K7EQT9	Galectin-3-binding protein	LGALS3BP	sp|Q08380|LG3BP_HUMAN Galectin-3-binding protein OS=Homo sapiens OX=9606 GN=LGALS3BP PE=1 SV=1	156350000	15	1.67901	2682300000	20	1.17326	101430000	24	0.779921	10	30	30	60.7	65.33	585	0	323.31	2940100000	173			914
P63261;I3L3I0;I3L1U9;I3L4N8;I3L3R2;J3KT65;K7EM38	Actin, cytoplasmic 2;Actin, cytoplasmic 2, N-terminally processed	ACTG1	sp|P63261|ACTG_HUMAN Actin, cytoplasmic 2 OS=Homo sapiens OX=9606 GN=ACTG1 PE=1 SV=1;tr|I3L3I0|I3L3I0_HUMAN Actin, cytoplasmic 2 (Fragment) OS=Homo sapiens OX=9606 GN=ACTG1 PE=1 SV=1;tr|I3L1U9|I3L1U9_HUMAN Actin, cytoplasmic 2 (Fragment) OS=Homo sapiens OX	75604000	23	0.811894	2464300000	21	1.07791	142760000	20	1.09772	7	35	1	90.4	41.792	375	0	323.31	2682600000	166			880
P04406;E7EUT5;O14556	Glyceraldehyde-3-phosphate dehydrogenase	GAPDH	sp|P04406|G3P_HUMAN Glyceraldehyde-3-phosphate dehydrogenase OS=Homo sapiens OX=9606 GN=GAPDH PE=1 SV=3;tr|E7EUT5|E7EUT5_HUMAN Glyceraldehyde-3-phosphate dehydrogenase OS=Homo sapiens OX=9606 GN=GAPDH PE=1 SV=1	40197000	39	0.431667	2200900000	22	0.962696	59001000	33	0.453674	3	24	24	80	36.053	335	0	323.31	2300100000	123			581
lcl|NC_017825.1_prot_YP_006272953.1_5	IVa2	db_xref=GeneID:12657139	lcl|NC_017825.1_prot_YP_006272953.1_5 [locus_tag=YOE_gp05] [db_xref=GeneID:12657139] [protein=IVa2] [protein_id=YP_006272953.1] [location=complement(join(3978..5311,5590..5602))] [gbkey=CDS]	146300000	17	1.57108	2001900000	23	0.875651	148580000	17	1.14247	1	38	37	87.3	50.364	448	0	323.31	2296800000	196			444
lcl|NC_017825.1_prot_YP_006272952.1_4	IX	db_xref=GeneID:12657138	lcl|NC_017825.1_prot_YP_006272952.1_4 [locus_tag=YOE_gp04] [db_xref=GeneID:12657138] [protein=pIX] [protein_id=YP_006272952.1] [location=3491..3919] [gbkey=CDS]	191590000	14	2.05744	1926500000	24	0.84267	147060000	18	1.13078	1	10	10	97.9	14.459	142	0	323.31	2265100000	112			443
lcl|NC_017825.1_prot_YP_006272969.1_21	VIII	db_xref=GeneID:12657124	lcl|NC_017825.1_prot_YP_006272969.1_21 [locus_tag=YOE_gp21] [db_xref=GeneID:12657124] [protein=pVIII] [protein_id=YP_006272969.1] [location=26455..27138] [gbkey=CDS]	203330000	13	2.18352	1698700000	25	0.743028	219590000	16	1.68848	1	14	14	73.6	24.757	227	0	323.31	2121600000	143			460
P68104;Q5VTE0;A0A087WVQ9;A0A087WV01;A0A2U3TZH3;Q05639;A0A2R8Y488;Q5JR01;A0A2R8Y660;A6PW80;A0A2R8YDN5;A0A6Q8PFK6	Elongation factor 1-alpha 1;Putative elongation factor 1-alpha-like 3;Elongation factor 1-alpha	EEF1A1;EEF1A1P5	sp|P68104|EF1A1_HUMAN Elongation factor 1-alpha 1 OS=Homo sapiens OX=9606 GN=EEF1A1 PE=1 SV=1;sp|Q5VTE0|EF1A3_HUMAN Putative elongation factor 1-alpha-like 3 OS=Homo sapiens OX=9606 GN=EEF1A1P5 PE=5 SV=1;tr|A0A087WVQ9|A0A087WVQ9_HUMAN Elongation factor 1-a	10438000	75	0.112091	1644600000	26	0.719364	46552000	40	0.35795	12	23	23	68	50.14	462	0	323.31	1701600000	89			886
P49321;Q5T624;E9PPR5;E9PI86;E9PRH9;H0YF33;H0YDS9;E9PNB5;E9PPQ8;E9PQG5;E9PAU3;E9PKR5;E9PJQ2	Nuclear autoantigenic sperm protein	NASP	sp|P49321|NASP_HUMAN Nuclear autoantigenic sperm protein OS=Homo sapiens OX=9606 GN=NASP PE=1 SV=2	64193000	26	0.689354	1609600000	27	0.704055	91185000	27	0.701145	13	53	53	83.8	85.237	788	0	323.31	1765000000	299			781
P05388;F8VWS0;F8VU65;Q8NHW5;F8VW21;F8VPE8;G3V210;F8VQY6;F8VRK7;F8VZS0;F8W1K8;F8VWV4;F8VS58	60S acidic ribosomal protein P0;60S acidic ribosomal protein P0-like	RPLP0;RPLP0P6	sp|P05388|RLA0_HUMAN 60S acidic ribosomal protein P0 OS=Homo sapiens OX=9606 GN=RPLP0 PE=1 SV=1;tr|F8VWS0|F8VWS0_HUMAN 60S acidic ribosomal protein P0 OS=Homo sapiens OX=9606 GN=RPLP0 PE=1 SV=1;tr|F8VU65|F8VU65_HUMAN 60S acidic ribosomal protein P0 (Fragme	6164300	100	0.066197	1606200000	28	0.702568	27031000	51	0.207848	13	19	19	65.3	34.273	317	0	249.73	1639400000	79			587
P63104;E7EX29;B0AZS6;E7ESK7;E9PD24;E7EVZ2;B7Z2E6;H0YB80;E5RIR4;E5RGE1	14-3-3 protein zeta/delta	YWHAZ	sp|P63104|1433Z_HUMAN 14-3-3 protein zeta/delta OS=Homo sapiens OX=9606 GN=YWHAZ PE=1 SV=1;tr|E7EX29|E7EX29_HUMAN 14-3-3 protein zeta/delta (Fragment) OS=Homo sapiens OX=9606 GN=YWHAZ PE=1 SV=1;tr|B0AZS6|B0AZS6_HUMAN 14-3-3 protein zeta/delta OS=Homo sapie	40225000	38	0.431967	1468600000	29	0.64238	65817000	30	0.506084	10	27	24	88.6	27.745	245	0	323.31	1574600000	126			873
P07237;H7BZ94;I3L312;I3L398;H0Y3Z3;I3L4M2;I3NI03;I3L3U6;I3L3P5;I3L0S0;I3L1Y5;I3L514	Protein disulfide-isomerase	P4HB	sp|P07237|PDIA1_HUMAN Protein disulfide-isomerase OS=Homo sapiens OX=9606 GN=P4HB PE=1 SV=3;tr|H7BZ94|H7BZ94_HUMAN Protein disulfide-isomerase OS=Homo sapiens OX=9606 GN=P4HB PE=1 SV=2;tr|I3L312|I3L312_HUMAN Protein disulfide-isomerase (Fragment) OS=Homo s	13974000	69	0.150064	1435600000	30	0.627946	24027000	56	0.18475	12	37	37	69.1	57.116	508	0	323.31	1473600000	115			594
P05387;H0YDD8	60S acidic ribosomal protein P2	RPLP2	sp|P05387|RLA2_HUMAN 60S acidic ribosomal protein P2 OS=Homo sapiens OX=9606 GN=RPLP2 PE=1 SV=1	19923000	54	0.213949	1366100000	31	0.597546	45407000	41	0.349146	2	17	15	100	11.665	115	0	323.31	1431500000	78			586
Q13813;A0A0D9SGF6	Spectrin alpha chain, non-erythrocytic 1	SPTAN1	sp|Q13813|SPTN1_HUMAN Spectrin alpha chain, non-erythrocytic 1 OS=Homo sapiens OX=9606 GN=SPTAN1 PE=1 SV=3;tr|A0A0D9SGF6|A0A0D9SGF6_HUMAN Spectrin alpha chain, non-erythrocytic 1 OS=Homo sapiens OX=9606 GN=SPTAN1 PE=1 SV=1	130370000	18	1.40001	1244300000	32	0.544269	141710000	21	1.08964	2	209	4	80.3	284.54	2472	0	323.31	1516400000	599			947
Q01082;A0A087WUZ3;F8W6C1;P11277;A4QPE4;A0A494C1G7;E9PJZ2	Spectrin beta chain, non-erythrocytic 1	SPTBN1	sp|Q01082|SPTB2_HUMAN Spectrin beta chain, non-erythrocytic 1 OS=Homo sapiens OX=9606 GN=SPTBN1 PE=1 SV=2;tr|A0A087WUZ3|A0A087WUZ3_HUMAN Spectrin beta chain OS=Homo sapiens OX=9606 GN=SPTBN1 PE=1 SV=1	114120000	21	1.22551	1235900000	33	0.540595	120040000	22	0.923018	7	157	145	73.6	274.61	2364	0	323.31	1470000000	482			897
Q07021;I3L3Q7;I3L3B0	Complement component 1 Q subcomponent-binding protein, mitochondrial	C1QBP	sp|Q07021|C1QBP_HUMAN Complement component 1 Q subcomponent-binding protein, mitochondrial OS=Homo sapiens OX=9606 GN=C1QBP PE=1 SV=1;tr|I3L3Q7|I3L3Q7_HUMAN Complement component 1 Q subcomponent-binding protein, mitochondrial (Fragment) OS=Homo sapiens OX=	3765000	138	0.0404315	1187200000	34	0.519293	12106000	89	0.0930861	3	9	9	60.6	31.362	282	0	319.79	1203100000	63			912
P27824;H0Y9Q7;D6RDP7;D6RGY2;D6RB85;D6RAU8;D6RFL1;D6RAQ8;H0Y9H1;D6RHJ3;D6RD16	Calnexin	CANX	sp|P27824|CALX_HUMAN Calnexin OS=Homo sapiens OX=9606 GN=CANX PE=1 SV=2	7889300	88	0.0847214	1162200000	35	0.508358	12196000	88	0.0937782	11	27	27	47.6	67.567	592	0	323.31	1182300000	84			702
P49327;A0A0U1RQF0;A0A0U1RRG3;A0A1B0GTR5;J3KTF0	Fatty acid synthase;[Acyl-carrier-protein] S-acetyltransferase;[Acyl-carrier-protein] S-malonyltransferase;3-oxoacyl-[acyl-carrier-protein] synthase;3-oxoacyl-[acyl-carrier-protein] reductase;3-hydroxyacyl-[acyl-carrier-protein] dehydratase;Enoyl-[acyl-carrier-protein] reductase;Oleoyl-[acyl-carrier-protein] hydrolase	FASN	sp|P49327|FAS_HUMAN Fatty acid synthase OS=Homo sapiens OX=9606 GN=FASN PE=1 SV=3;tr|A0A0U1RQF0|A0A0U1RQF0_HUMAN 3-hydroxyacyl-[acyl-carrier-protein] dehydratase OS=Homo sapiens OX=9606 GN=FASN PE=1 SV=1	37129000	40	0.39872	1158200000	36	0.506608	46569000	39	0.358081	5	102	102	59.3	273.42	2511	0	323.31	1241900000	321			782
Q5JP53;P07437;Q5ST81;A6NNZ2;CON__ENSEMBL:ENSBTAP00000025008;Q9H4B7;G3V5W4;G3V2R8;G3V3R4;G3V2N6	Tubulin beta chain	TUBB	tr|Q5JP53|Q5JP53_HUMAN Tubulin beta chain OS=Homo sapiens OX=9606 GN=TUBB PE=1 SV=1;sp|P07437|TBB5_HUMAN Tubulin beta chain OS=Homo sapiens OX=9606 GN=TUBB PE=1 SV=2;tr|Q5ST81|Q5ST81_HUMAN Tubulin beta chain OS=Homo sapiens OX=9606 GN=TUBB PE=1 SV=1	22343000	48	0.239936	1110500000	37	0.485744	52815000	35	0.406108	10	36	6	77.7	47.766	426	0	188.55	1185700000	50			595
P55884;C9JZG1;C9JQN7	Eukaryotic translation initiation factor 3 subunit B	EIF3B	sp|P55884|EIF3B_HUMAN Eukaryotic translation initiation factor 3 subunit B OS=Homo sapiens OX=9606 GN=EIF3B PE=1 SV=3	290570	395	0.00312037	1096300000	38	0.479533	2274300	202	0.0174877	3	39	39	62.9	92.48	814	0	323.31	1098900000	68			825
P67936;A0A2R8Y5V9;A0A2R8YGX3;A0A2R8YE05;K7ENT6;A0A2R8YH90;A0A2R8YHD2;A0A2R8YEU4;A0A5F9UN72;A0A590UJB9;A0A590UK79;K7EPB9;U3KQK2	Tropomyosin alpha-4 chain	TPM4	sp|P67936|TPM4_HUMAN Tropomyosin alpha-4 chain OS=Homo sapiens OX=9606 GN=TPM4 PE=1 SV=3;tr|A0A2R8Y5V9|A0A2R8Y5V9_HUMAN Tropomyosin alpha-4 chain OS=Homo sapiens OX=9606 GN=TPM4 PE=1 SV=1;tr|A0A2R8YGX3|A0A2R8YGX3_HUMAN Tropomyosin alpha-4 chain OS=Homo sap	29918000	43	0.321283	1060100000	39	0.463698	74426000	29	0.572281	13	28	14	68.1	28.521	248	0	323.31	1164500000	80			884
Q14152	Eukaryotic translation initiation factor 3 subunit A	EIF3A	sp|Q14152|EIF3A_HUMAN Eukaryotic translation initiation factor 3 subunit A OS=Homo sapiens OX=9606 GN=EIF3A PE=1 SV=1	0	657	0	1060000000	40	0.463655	6087200	125	0.046806	1	41	41	35.5	166.57	1382	0	323.31	1066100000	103			954
P05386	60S acidic ribosomal protein P1	RPLP1	sp|P05386|RLA1_HUMAN 60S acidic ribosomal protein P1 OS=Homo sapiens OX=9606 GN=RPLP1 PE=1 SV=1	14059000	67	0.150976	941350000	41	0.411756	34310000	47	0.263818	1	8	6	99.1	11.514	114	0	108.8	989720000	52			585
P06748;E5RI98;E5RGW4	Nucleophosmin	NPM1	sp|P06748|NPM_HUMAN Nucleophosmin OS=Homo sapiens OX=9606 GN=NPM1 PE=1 SV=2	176190	467	0.00189206	923080000	42	0.403764	3595800	159	0.027649	3	13	13	68.4	32.575	294	0	323.31	926850000	57			591
K7ELL7;P14314;K7EPW7;A0A0C4DGP4;K7EKX1;K7EJ70	Glucosidase 2 subunit beta	PRKCSH	tr|K7ELL7|K7ELL7_HUMAN Glucosidase 2 subunit beta OS=Homo sapiens OX=9606 GN=PRKCSH PE=1 SV=1;sp|P14314|GLU2B_HUMAN Glucosidase 2 subunit beta OS=Homo sapiens OX=9606 GN=PRKCSH PE=1 SV=2	7999000	86	0.0858995	890240000	43	0.3894	12547000	83	0.0964771	6	18	18	45.6	60.192	535	0	237.78	910790000	50			431
P31946;Q4VY20;Q4VY19;A0A0J9YWE8;A0A0J9YWZ2	14-3-3 protein beta/alpha;14-3-3 protein beta/alpha, N-terminally processed	YWHAB	sp|P31946|1433B_HUMAN 14-3-3 protein beta/alpha OS=Homo sapiens OX=9606 GN=YWHAB PE=1 SV=3	8144500	85	0.087462	869080000	44	0.380144	13146000	81	0.101083	5	18	13	77.6	28.082	246	0	323.31	890370000	60			720
P61981	14-3-3 protein gamma;14-3-3 protein gamma, N-terminally processed	YWHAG	sp|P61981|1433G_HUMAN 14-3-3 protein gamma OS=Homo sapiens OX=9606 GN=YWHAG PE=1 SV=2	10222000	76	0.109772	868020000	45	0.379681	25973000	52	0.199713	1	21	17	83.8	28.302	247	0	323.31	904220000	85			847
P60842;J3KT12;J3QS69;J3KTB5;J3QL43;J3QR64;J3KSZ0;J3QLN6;E7EQG2;Q14240;J3QKZ9;J3KS25;J3KTN0;J3KS93;J3KT04;J3QQP0;J3QL52;E7EMV8;J3KSN7;E9PBH4;F8WE11;C9JUF0	Eukaryotic initiation factor 4A-I	EIF4A1	sp|P60842|IF4A1_HUMAN Eukaryotic initiation factor 4A-I OS=Homo sapiens OX=9606 GN=EIF4A1 PE=1 SV=1;tr|J3KT12|J3KT12_HUMAN RNA helicase OS=Homo sapiens OX=9606 GN=EIF4A1 PE=1 SV=1;tr|J3QS69|J3QS69_HUMAN RNA helicase (Fragment) OS=Homo sapiens OX=9606 GN=EI	7398600	92	0.0794519	803830000	46	0.351603	11877000	92	0.0913253	22	25	22	70.7	46.153	406	0	323.31	823110000	98			833
O75643;A0A494C1A5	U5 small nuclear ribonucleoprotein 200 kDa helicase	SNRNP200	sp|O75643|U520_HUMAN U5 small nuclear ribonucleoprotein 200 kDa helicase OS=Homo sapiens OX=9606 GN=SNRNP200 PE=1 SV=2;tr|A0A494C1A5|A0A494C1A5_HUMAN U5 small nuclear ribonucleoprotein 200 kDa helicase (Fragment) OS=Homo sapiens OX=9606 GN=SNRNP200 PE=1 SV	1972800	168	0.0211855	751790000	47	0.32884	9516900	99	0.0731779	2	79	79	51.7	244.5	2136	0	323.31	763280000	177			548
Q58FF8	Putative heat shock protein HSP 90-beta 2	HSP90AB2P	sp|Q58FF8|H90B2_HUMAN Putative heat shock protein HSP 90-beta 2 OS=Homo sapiens OX=9606 GN=HSP90AB2P PE=1 SV=2	12684000	70	0.136211	732980000	48	0.320613	12247000	86	0.0941703	1	13	2	24.9	44.348	381	0	58.114	757910000	16			1002
P26641	Elongation factor 1-gamma	EEF1G	sp|P26641|EF1G_HUMAN Elongation factor 1-gamma OS=Homo sapiens OX=9606 GN=EEF1G PE=1 SV=3	8872900	81	0.0952841	721730000	49	0.315692	21710000	62	0.166934	1	24	24	69.6	50.118	437	0	262.67	752310000	86			696
Q99613;B5ME19;H3BPE4;H3BPE3;H3BTY8	Eukaryotic translation initiation factor 3 subunit C;Eukaryotic translation initiation factor 3 subunit C-like protein	EIF3C;EIF3CL	sp|Q99613|EIF3C_HUMAN Eukaryotic translation initiation factor 3 subunit C OS=Homo sapiens OX=9606 GN=EIF3C PE=1 SV=1;sp|B5ME19|EIFCL_HUMAN Eukaryotic translation initiation factor 3 subunit C-like protein OS=Homo sapiens OX=9606 GN=EIF3CL PE=1 SV=1	0	657	0	673580000	50	0.294631	3787400	157	0.0291223	5	30	30	41.1	105.34	913	0	323.31	677370000	61			1120
C9JIF9;P13798;H7C393;H7C1U0;C9JLK2;F8WEH5	Acylamino-acid-releasing enzyme	APEH	tr|C9JIF9|C9JIF9_HUMAN Acyl-peptide hydrolase OS=Homo sapiens OX=9606 GN=APEH PE=1 SV=1;sp|P13798|ACPH_HUMAN Acylamino-acid-releasing enzyme OS=Homo sapiens OX=9606 GN=APEH PE=1 SV=4	14452000	66	0.155197	669720000	51	0.292942	17875000	69	0.137445	6	30	30	60.5	81.673	737	0	323.31	702050000	100			224
O14744;H0YJX6;G3V580;G3V2L6;G3V2X6;G3V5L5;H0YJD3;C9JSX3;H0YJ77;H7BZ44;G3V5T6;G3V507;G3V2F5	Protein arginine N-methyltransferase 5;Protein arginine N-methyltransferase 5, N-terminally processed	PRMT5	sp|O14744|ANM5_HUMAN Protein arginine N-methyltransferase 5 OS=Homo sapiens OX=9606 GN=PRMT5 PE=1 SV=4	4010600	135	0.0430689	658380000	52	0.287982	12205000	87	0.0938474	13	26	26	54.8	72.683	637	0	323.31	674590000	75			494
Q7Z6Z7;H0Y659;A0A087X1S3;A0A1B0GXC7;A5YM72	E3 ubiquitin-protein ligase HUWE1	HUWE1	sp|Q7Z6Z7|HUWE1_HUMAN E3 ubiquitin-protein ligase HUWE1 OS=Homo sapiens OX=9606 GN=HUWE1 PE=1 SV=3	15175000	63	0.162961	623860000	53	0.272883	17463000	71	0.134277	5	82	81	31.9	481.89	4374	0	323.31	656500000	172			1045
P13639	Elongation factor 2	EEF2	sp|P13639|EF2_HUMAN Elongation factor 2 OS=Homo sapiens OX=9606 GN=EEF2 PE=1 SV=4	9648500	80	0.103613	621820000	54	0.27199	23178000	57	0.178222	1	44	44	56.6	95.337	858	0	323.31	654650000	138			633
Q15393;J3QRB2;J3QL37;I3L4G7;J3QKV4;H3BMB0	Splicing factor 3B subunit 3	SF3B3	sp|Q15393|SF3B3_HUMAN Splicing factor 3B subunit 3 OS=Homo sapiens OX=9606 GN=SF3B3 PE=1 SV=4	8189800	84	0.0879484	604000000	55	0.264196	11626000	93	0.0893953	6	43	43	49.9	135.58	1217	0	323.31	623820000	131			977
E5RGV5;E5RG67;F8W8I6;P31483	Nucleolysin TIA-1 isoform p40	TIA1	tr|E5RGV5|E5RGV5_HUMAN Nucleolysin TIA-1 isoform p40 OS=Homo sapiens OX=9606 GN=TIA1 PE=1 SV=1;tr|E5RG67|E5RG67_HUMAN Nucleolysin TIA-1 isoform p40 OS=Homo sapiens OX=9606 GN=TIA1 PE=1 SV=1;tr|F8W8I6|F8W8I6_HUMAN Nucleolysin TIA-1 isoform p40 OS=Homo sapie	50960000	35	0.547248	599270000	56	0.262127	44576000	42	0.342756	4	1	1	9	15.821	144	0.0060293	6.4197	694800000	6			261
P14618;B4DNK4;H3BTN5;H3BQ34;H3BR70;H3BUW1;H3BTJ2;H3BT25;H3BU13;P30613	Pyruvate kinase PKM;Pyruvate kinase	PKM	sp|P14618|KPYM_HUMAN Pyruvate kinase PKM OS=Homo sapiens OX=9606 GN=PKM PE=1 SV=4;tr|B4DNK4|B4DNK4_HUMAN Pyruvate kinase OS=Homo sapiens OX=9606 GN=PKM PE=1 SV=1;tr|H3BTN5|H3BTN5_HUMAN Pyruvate kinase (Fragment) OS=Homo sapiens OX=9606 GN=PKM PE=1 SV=1;tr|	15234000	62	0.163595	597360000	57	0.261291	18167000	66	0.139691	10	32	32	65.9	57.936	531	0	323.31	630760000	116			643
Q09028;H0YF10;H0YCT5;H0YDK2;H0YEU5;E9PNS6;C9JPP3;E9PNS2;E9PND5;E9PIC4	Histone-binding protein RBBP4	RBBP4	sp|Q09028|RBBP4_HUMAN Histone-binding protein RBBP4 OS=Homo sapiens OX=9606 GN=RBBP4 PE=1 SV=3;tr|H0YF10|H0YF10_HUMAN Histone-binding protein RBBP4 (Fragment) OS=Homo sapiens OX=9606 GN=RBBP4 PE=1 SV=1	6063500	102	0.0651146	594040000	58	0.259839	8772200	104	0.0674517	10	20	14	77.9	47.655	425	0	185.12	608880000	54			917
A0A087WVQ6;Q00610;J3KS13;K7EJJ5;J3KSQ2;J3KRF5;J3QL20;F5H5N6;A0A087WV74;A0A087WXH4	Clathrin heavy chain;Clathrin heavy chain 1	CLTC	tr|A0A087WVQ6|A0A087WVQ6_HUMAN Clathrin heavy chain OS=Homo sapiens OX=9606 GN=CLTC PE=1 SV=1;sp|Q00610|CLH1_HUMAN Clathrin heavy chain 1 OS=Homo sapiens OX=9606 GN=CLTC PE=1 SV=5	21669000	49	0.232699	535290000	59	0.234141	32615000	48	0.250785	10	75	59	58	192.06	1679	0	323.31	589570000	205			26
Q9Y262;B0QY89;B0QY90;C9JHP4;C9K0Q7;H7C3A0;H0Y7E6	Eukaryotic translation initiation factor 3 subunit L	EIF3L	sp|Q9Y262|EIF3L_HUMAN Eukaryotic translation initiation factor 3 subunit L OS=Homo sapiens OX=9606 GN=EIF3L PE=1 SV=1;tr|B0QY89|B0QY89_HUMAN Eukaryotic translation initiation factor 3 subunit L OS=Homo sapiens OX=9606 GN=EIF3L PE=1 SV=1;tr|B0QY90|B0QY90_HU	273700	407	0.0029392	532980000	60	0.233131	2877000	188	0.022122	7	23	23	50.7	66.726	564	0	323.31	536130000	54			1225
A0A087WYT3;Q15185;B4DDC6	Prostaglandin E synthase 3	PTGES3	tr|A0A087WYT3|A0A087WYT3_HUMAN Prostaglandin E synthase 3 OS=Homo sapiens OX=9606 GN=PTGES3 PE=1 SV=1;sp|Q15185|TEBP_HUMAN Prostaglandin E synthase 3 OS=Homo sapiens OX=9606 GN=PTGES3 PE=1 SV=1;tr|B4DDC6|B4DDC6_HUMAN Prostaglandin E synthase 3 OS=Homo sapi	584350	305	0.0062752	528310000	61	0.231088	1352500	262	0.0103997	3	6	6	40.2	19.155	164	0	207.32	530250000	16			34
Q9Y265;E7ETR0;H7C4G5;H7C4I3;J3QLR1	RuvB-like 1	RUVBL1	sp|Q9Y265|RUVB1_HUMAN RuvB-like 1 OS=Homo sapiens OX=9606 GN=RUVBL1 PE=1 SV=1;tr|E7ETR0|E7ETR0_HUMAN RuvB-like helicase OS=Homo sapiens OX=9606 GN=RUVBL1 PE=1 SV=1	15292000	61	0.164217	527350000	62	0.230668	22330000	60	0.171701	5	33	33	77.9	50.227	456	0	323.31	564970000	101			1226
P21333;Q60FE5;A0A087WWY3;F8WE98;H0Y5C6;H0Y5F3;Q14315;H7C2E7;A0A669KBC6	Filamin-A	FLNA	sp|P21333|FLNA_HUMAN Filamin-A OS=Homo sapiens OX=9606 GN=FLNA PE=1 SV=4;tr|Q60FE5|Q60FE5_HUMAN Filamin-A OS=Homo sapiens OX=9606 GN=FLNA PE=1 SV=1;tr|A0A087WWY3|A0A087WWY3_HUMAN Filamin-A OS=Homo sapiens OX=9606 GN=FLNA PE=1 SV=1	20398000	52	0.21905	525080000	63	0.229675	35050000	46	0.269508	9	91	88	51.8	280.74	2647	0	323.31	580530000	238			669
P29692;E9PK01;E9PRY8;A0A087X1X7;E9PQ49;E9PI39;E9PQZ1;E9PMW7;E9PPR1;E9PL12;E9PL71;E9PN91;E9PIZ1;H0YE72;H0YCK7;H0YE58;E9PKK3;E9PK72;E9PK06;E9PNW6;E9PQC9;E9PJD0	Elongation factor 1-delta	EEF1D	sp|P29692|EF1D_HUMAN Elongation factor 1-delta OS=Homo sapiens OX=9606 GN=EEF1D PE=1 SV=5;tr|E9PK01|E9PK01_HUMAN Elongation factor 1-delta (Fragment) OS=Homo sapiens OX=9606 GN=EEF1D PE=1 SV=1;tr|E9PRY8|E9PRY8_HUMAN Elongation factor 1-delta OS=Homo sapien	1762500	181	0.0189271	513350000	64	0.224544	5263400	135	0.0404716	22	11	10	58.4	31.121	281	0	190.65	520380000	35			708
P68032;P63267;P68133;P62736;A6NL76;F8WB63;B8ZZJ2;C9JFL5;F6UVQ4;F6QUT6	Actin, alpha cardiac muscle 1;Actin, gamma-enteric smooth muscle;Actin, alpha skeletal muscle;Actin, aortic smooth muscle	ACTC1;ACTG2;ACTA1;ACTA2	sp|P68032|ACTC_HUMAN Actin, alpha cardiac muscle 1 OS=Homo sapiens OX=9606 GN=ACTC1 PE=1 SV=1;sp|P63267|ACTH_HUMAN Actin, gamma-enteric smooth muscle OS=Homo sapiens OX=9606 GN=ACTG2 PE=1 SV=1;sp|P68133|ACTS_HUMAN Actin, alpha skeletal muscle OS=Homo sapie	17142000	59	0.184084	512140000	65	0.224015	2866200	189	0.0220389	10	20	3	42.2	42.019	377	0	55.233	532150000	17			885
P62805	Histone H4	HIST1H4A	sp|P62805|H4_HUMAN Histone H4 OS=Homo sapiens OX=9606 GN=H4C1 PE=1 SV=2	11346000	72	0.121842	502640000	66	0.21986	7774600	111	0.0597809	1	12	12	61.2	11.367	103	0	136.61	521770000	29			864
Q15029;K7EP67;K7EJ74;K7EIT3;K7EIV5	116 kDa U5 small nuclear ribonucleoprotein component	EFTUD2	sp|Q15029|U5S1_HUMAN 116 kDa U5 small nuclear ribonucleoprotein component OS=Homo sapiens OX=9606 GN=EFTUD2 PE=1 SV=1	718700	271	0.00771796	502490000	67	0.219794	5458100	131	0.0419687	5	44	44	66	109.43	972	0	323.31	508670000	99			967
P27348;E9PG15	14-3-3 protein theta	YWHAQ	sp|P27348|1433T_HUMAN 14-3-3 protein theta OS=Homo sapiens OX=9606 GN=YWHAQ PE=1 SV=1;tr|E9PG15|E9PG15_HUMAN 14-3-3 protein theta (Fragment) OS=Homo sapiens OX=9606 GN=YWHAQ PE=1 SV=1	10445000	74	0.112167	496150000	68	0.217021	18750000	65	0.144174	2	24	23	85.3	27.764	245	0	323.31	525350000	59			697
Q6P2Q9;I3L0J9;I3L3Z8	Pre-mRNA-processing-splicing factor 8	PRPF8	sp|Q6P2Q9|PRP8_HUMAN Pre-mRNA-processing-splicing factor 8 OS=Homo sapiens OX=9606 GN=PRPF8 PE=1 SV=2	1374400	197	0.0147594	493950000	69	0.216059	4395500	148	0.0337981	3	70	70	40.4	273.6	2335	0	323.31	499720000	129			1024
P13667;A0A499FI48	Protein disulfide-isomerase A4	PDIA4	sp|P13667|PDIA4_HUMAN Protein disulfide-isomerase A4 OS=Homo sapiens OX=9606 GN=PDIA4 PE=1 SV=2;tr|A0A499FI48|A0A499FI48_HUMAN Protein disulfide-isomerase OS=Homo sapiens OX=9606 GN=PDIA4 PE=1 SV=1	467660	331	0.0050221	483520000	70	0.211496	2222500	206	0.0170894	2	29	29	48.2	72.932	645	0	323.31	486210000	51			634
O43847;G3V1R5;F5H7V1;H0Y5G9	Nardilysin	NRD1	sp|O43847|NRDC_HUMAN Nardilysin OS=Homo sapiens OX=9606 GN=NRDC PE=1 SV=3;tr|G3V1R5|G3V1R5_HUMAN Nardilysin OS=Homo sapiens OX=9606 GN=NRDC PE=1 SV=1;tr|F5H7V1|F5H7V1_HUMAN Nardilysin OS=Homo sapiens OX=9606 GN=NRDC PE=1 SV=2;tr|H0Y5G9|H0Y5G9_HUMAN Nardily	0	657	0	470650000	71	0.205867	913110	306	0.00702114	4	35	35	41.6	131.7	1151	0	323.31	471560000	73			520
lcl|NC_017825.1_prot_YP_006272967.1_19	33K	db_xref=GeneID:12657122	lcl|NC_017825.1_prot_YP_006272967.1_19 [locus_tag=YOE_gp19] [db_xref=GeneID:12657122] [protein=33K] [protein_id=YP_006272967.1] [location=join(25544..25871,26041..26372)] [gbkey=CDS]	2331100	158	0.0250332	469990000	72	0.205578	14495000	76	0.111456	1	10	9	36.5	24.662	219	0	156.41	486820000	34			458
Q7L2H7;J3KNJ2;H0YCQ8;E9PN86;E9PRY0;E9PRI2;E7ESM3	Eukaryotic translation initiation factor 3 subunit M	EIF3M	sp|Q7L2H7|EIF3M_HUMAN Eukaryotic translation initiation factor 3 subunit M OS=Homo sapiens OX=9606 GN=EIF3M PE=1 SV=1;tr|J3KNJ2|J3KNJ2_HUMAN Eukaryotic translation initiation factor 3 subunit M (Fragment) OS=Homo sapiens OX=9606 GN=EIF3M PE=1 SV=1;tr|H0YCQ	0	657	0	465420000	73	0.203579	422580	417	0.00324933	7	17	17	56.7	42.502	374	0	232.54	465840000	32			1039
P14543	Nidogen-1	NID1	sp|P14543|NID1_HUMAN Nidogen-1 OS=Homo sapiens OX=9606 GN=NID1 PE=1 SV=3	7133800	94	0.0766083	462580000	74	0.202337	12314000	85	0.0946855	1	41	40	51.9	136.38	1247	0	323.31	482030000	109			641
O00303;H0YDT6;E9PQV8;A0A1W2PP79	Eukaryotic translation initiation factor 3 subunit F	EIF3F	sp|O00303|EIF3F_HUMAN Eukaryotic translation initiation factor 3 subunit F OS=Homo sapiens OX=9606 GN=EIF3F PE=1 SV=1	0	657	0	447730000	75	0.195842	3530100	162	0.0271438	4	15	15	55.5	37.563	357	0	205.11	451260000	35			485
Q13347;Q5TFK1	Eukaryotic translation initiation factor 3 subunit I	EIF3I	sp|Q13347|EIF3I_HUMAN Eukaryotic translation initiation factor 3 subunit I OS=Homo sapiens OX=9606 GN=EIF3I PE=1 SV=1	502020	327	0.00539108	437750000	76	0.191476	3304200	172	0.0254068	2	16	16	69.5	36.501	325	0	243.63	441560000	53			940
O15371;B0QYA5;B0QYA4;B0QYA8;B0QYA6;A0A0D9SGB5	Eukaryotic translation initiation factor 3 subunit D	EIF3D	sp|O15371|EIF3D_HUMAN Eukaryotic translation initiation factor 3 subunit D OS=Homo sapiens OX=9606 GN=EIF3D PE=1 SV=1	0	657	0	419380000	77	0.183441	1109200	287	0.00852892	6	20	20	53.5	63.972	548	0	205.4	420490000	54			507
lcl|NC_017825.1_prot_YP_006272961.1_13	Mu	db_xref=GeneID:12657116	lcl|NC_017825.1_prot_YP_006272961.1_13 [locus_tag=YOE_gp13] [db_xref=GeneID:12657116] [protein=Mu] [protein_id=YP_006272961.1] [location=17161..17394] [gbkey=CDS]	63149000	28	0.678143	413380000	78	0.180817	0	627	0	1	1	1	11.7	8.4941	77	0.0099668	6.1988	476530000	2			452
P60228;E5RGA2;E5RHS5;H0YAW4;H0YBR5;E5RII3;E5RIP5;E5RJ25;H0YBP5;E5RIT4	Eukaryotic translation initiation factor 3 subunit E	EIF3E	sp|P60228|EIF3E_HUMAN Eukaryotic translation initiation factor 3 subunit E OS=Homo sapiens OX=9606 GN=EIF3E PE=1 SV=1;tr|E5RGA2|E5RGA2_HUMAN Eukaryotic translation initiation factor 3 subunit E OS=Homo sapiens OX=9606 GN=EIF3E PE=1 SV=1;tr|E5RHS5|E5RHS5_HU	0	657	0	404500000	79	0.176932	357760	450	0.00275091	10	17	17	50.3	52.22	445	0	323.31	404860000	40			830
P78527;H0YG84;F5GX40	DNA-dependent protein kinase catalytic subunit	PRKDC	sp|P78527|PRKDC_HUMAN DNA-dependent protein kinase catalytic subunit OS=Homo sapiens OX=9606 GN=PRKDC PE=1 SV=3	5531900	109	0.0594058	398050000	80	0.174111	3441600	164	0.0264633	3	89	89	28.2	469.08	4128	0	323.31	407030000	153			892
C9J9K3;A0A0C4DG17;P08865;F8WD59	40S ribosomal protein SA	RPSA	tr|C9J9K3|C9J9K3_HUMAN 40S ribosomal protein SA (Fragment) OS=Homo sapiens OX=9606 GN=RPSA PE=1 SV=8;tr|A0A0C4DG17|A0A0C4DG17_HUMAN 40S ribosomal protein SA OS=Homo sapiens OX=9606 GN=RPSA PE=1 SV=1;sp|P08865|RSSA_HUMAN 40S ribosomal protein SA OS=Homo sap	5189800	113	0.0557321	386100000	81	0.168884	10123000	94	0.0778384	4	18	18	71.5	29.404	263	0	323.31	401420000	53			67
P63244;J3KPE3;H0YAF8;D6RAC2;H0Y8W2;H0YAM7;D6REE5;D6RHH4;D6R9Z1;D6R9L0;D6RFX4;D6RF23;H0Y8R5;D6RFZ9;D6RAU2;E9PD14;D6RBD0;H0Y9P0;D6RHJ5;D6RGK8;D6R909;D6RDI0	Guanine nucleotide-binding protein subunit beta-2-like 1;Guanine nucleotide-binding protein subunit beta-2-like 1, N-terminally processed	GNB2L1	sp|P63244|RACK1_HUMAN Receptor of activated protein C kinase 1 OS=Homo sapiens OX=9606 GN=RACK1 PE=1 SV=3;tr|J3KPE3|J3KPE3_HUMAN Receptor of-activated protein C kinase 1 OS=Homo sapiens OX=9606 GN=RACK1 PE=1 SV=1;tr|H0YAF8|H0YAF8_HUMAN Receptor of-activate	4366600	124	0.0468919	376310000	82	0.164602	3942300	154	0.0303134	22	16	16	73.8	35.076	317	0	323.31	384620000	53			879
G3V4W0;B4DY08;B2R5W2;G3V4C1;G3V251;G3V5X6;G3V3K6;B4DSU6;G3V2D6;A0A0G2JPF8;A0A0G2JNQ3;P0DMR1;O60812;B7ZW38;B2RXH8;G3V2H6;G3V4M8;G3V5V7	Heterogeneous nuclear ribonucleoprotein C-like 4;Heterogeneous nuclear ribonucleoprotein C-like 1;Heterogeneous nuclear ribonucleoprotein C-like 3;Heterogeneous nuclear ribonucleoprotein C-like 2	HNRNPC;HNRNPCL4;HNRNPCL1;HNRNPCL3;HNRNPCL2	tr|G3V4W0|G3V4W0_HUMAN Heterogeneous nuclear ribonucleoproteins C1/C2 (Fragment) OS=Homo sapiens OX=9606 GN=HNRNPC PE=1 SV=1;tr|B4DY08|B4DY08_HUMAN Heterogeneous nuclear ribonucleoproteins C1/C2 OS=Homo sapiens OX=9606 GN=HNRNPC PE=1 SV=1;tr|B2R5W2|B2R5W2_	80231	595	0.000861583	370340000	83	0.16199	1806900	223	0.0138937	18	10	2	33.2	28.916	262	0	141.6	372220000	22			187
Q04917;A2IDB2;F8WEB6;A2IDB1	14-3-3 protein eta	YWHAH	sp|Q04917|1433F_HUMAN 14-3-3 protein eta OS=Homo sapiens OX=9606 GN=YWHAH PE=1 SV=4	9691700	79	0.104077	367070000	84	0.16056	13520000	79	0.103959	4	21	19	76	28.218	246	0	320.56	390280000	58			908
lcl|NC_017825.1_prot_YP_006272964.1_16	Endoprotease	db_xref=GeneID:12657119	lcl|NC_017825.1_prot_YP_006272964.1_16 [locus_tag=YOE_gp16] [db_xref=GeneID:12657119] [protein=endoprotease] [protein_id=YP_006272964.1] [location=21146..21775] [gbkey=CDS]	23826000	47	0.255862	366030000	85	0.160105	25466000	55	0.195815	1	18	18	76.1	23.84	209	0	323.31	415330000	64			455
Q9Y230;M0R0Y3;X6R2L4;M0QXI6;M0R0Z0;M0QXZ7;A0A1W2PS48	RuvB-like 2	RUVBL2	sp|Q9Y230|RUVB2_HUMAN RuvB-like 2 OS=Homo sapiens OX=9606 GN=RUVBL2 PE=1 SV=3;tr|M0R0Y3|M0R0Y3_HUMAN RuvB-like helicase OS=Homo sapiens OX=9606 GN=RUVBL2 PE=1 SV=1	14045000	68	0.150826	356490000	86	0.155932	25553000	53	0.196484	7	34	34	80.8	51.156	463	0	323.31	396090000	87			1224
lcl|NC_017825.1_prot_YP_006272973.1_25	fiber	db_xref=GeneID:12657128	lcl|NC_017825.1_prot_YP_006272973.1_25 [locus_tag=YOE_gp25] [db_xref=GeneID:12657128] [protein=fiber] [protein_id=YP_006272973.1] [location=32290..33621] [gbkey=CDS]	102540000	22	1.10115	333760000	87	0.14599	93303000	25	0.717431	1	22	22	62.3	47.304	443	0	323.31	529600000	113			461
A0A0G2JIW1;P0DMV9;P0DMV8;V9GZ37;P48741	Heat shock 70 kDa protein 1B;Heat shock 70 kDa protein 1A	HSPA1B;HSPA1A	tr|A0A0G2JIW1|A0A0G2JIW1_HUMAN Heat shock 70 kDa protein 1B OS=Homo sapiens OX=9606 GN=HSPA1B PE=1 SV=1;sp|P0DMV9|HS71B_HUMAN Heat shock 70 kDa protein 1B OS=Homo sapiens OX=9606 GN=HSPA1B PE=1 SV=1;sp|P0DMV8|HS71A_HUMAN Heat shock 70 kDa protein 1A OS=Hom	3523900	139	0.0378424	332680000	88	0.145518	12058000	90	0.0927171	5	28	17	52.5	70.108	642	0	323.31	348260000	66			77
P17987;E7EQR6;E7ERF2;F5H282;F5GZ03;F5H136;F5H726;F5GZI8;F5H676;F5GYL4;F5H7Y1	T-complex protein 1 subunit alpha	TCP1	sp|P17987|TCPA_HUMAN T-complex protein 1 subunit alpha OS=Homo sapiens OX=9606 GN=TCP1 PE=1 SV=1;tr|E7EQR6|E7EQR6_HUMAN T-complex protein 1 subunit alpha OS=Homo sapiens OX=9606 GN=TCP1 PE=1 SV=1;tr|E7ERF2|E7ERF2_HUMAN CCT-alpha OS=Homo sapiens OX=9606 GN=	8826500	82	0.0947858	321600000	89	0.140671	22524000	59	0.173193	11	36	36	72.7	60.343	556	0	323.31	352950000	113			654
B3KS98;O15372;A0A087WZK9;E5RJT0;E5RFH0;E5RGU4;E5RFW7	Eukaryotic translation initiation factor 3 subunit H	EIF3H	tr|B3KS98|B3KS98_HUMAN Eukaryotic translation initiation factor 3 subunit H OS=Homo sapiens OX=9606 GN=EIF3H PE=1 SV=1;sp|O15372|EIF3H_HUMAN Eukaryotic translation initiation factor 3 subunit H OS=Homo sapiens OX=9606 GN=EIF3H PE=1 SV=1;tr|A0A087WZK9|A0A08	0	657	0	294290000	90	0.128725	462050	406	0.00355282	7	13	13	45.9	41.581	366	0	159.52	294750000	29			189
A0A2R8YD58;E7EU96;P68400;A0A2R8Y5A0;A0A2R8YF43;A0A2R8YFU2;Q8NEV1;A0A2R8YDP2;A0A2R8Y4D6;A0A2R8Y4H0;V9GYA2;A0A2R8YDY7;A0A2R8YEW1;A0A087WY74;A0A2R8YCK2;V9GYW6;A0A2R8Y3W6;A0A2R8Y797;A0A2R8YEL7;V9GY80;A0A2R8YF47;A0A2R8Y7T1	Casein kinase II subunit alpha;Casein kinase II subunit alpha 3	CSNK2A1;CSNK2A3	tr|A0A2R8YD58|A0A2R8YD58_HUMAN Casein kinase II subunit alpha OS=Homo sapiens OX=9606 GN=CSNK2A1 PE=1 SV=1;tr|E7EU96|E7EU96_HUMAN Casein kinase II subunit alpha OS=Homo sapiens OX=9606 GN=CSNK2A1 PE=1 SV=1;sp|P68400|CSK21_HUMAN Casein kinase II subunit alp	1470100	187	0.0157871	287940000	91	0.125948	4985100	140	0.0383317	22	16	16	55.6	44.418	376	0	191.71	294400000	34			120
P11021	78 kDa glucose-regulated protein	HSPA5	sp|P11021|BIP_HUMAN Endoplasmic reticulum chaperone BiP OS=Homo sapiens OX=9606 GN=HSPA5 PE=1 SV=2	1257300	206	0.0135019	285840000	92	0.125029	4030300	153	0.03099	1	19	18	33.6	72.332	654	0	323.31	291120000	45			617
Q02952	A-kinase anchor protein 12	AKAP12	sp|Q02952|AKA12_HUMAN A-kinase anchor protein 12 OS=Homo sapiens OX=9606 GN=AKAP12 PE=1 SV=4	6304300	98	0.0677005	277230000	93	0.121263	8909200	101	0.0685051	1	48	48	43.3	191.48	1782	0	323.31	292450000	104			905
F8VY35;F5H4R6;H0YIV4;P55209;F8VV59;F8W0J6;F8W118;F8W543;B7Z9C2;H0YH88;H0YHC3;F8W020;F8VUX1;F8VXI6;F8VRJ2;F8VVB5;B7Z4K9	Nucleosome assembly protein 1-like 1	NAP1L1	tr|F8VY35|F8VY35_HUMAN Nucleosome assembly protein 1-like 1 (Fragment) OS=Homo sapiens OX=9606 GN=NAP1L1 PE=1 SV=1;tr|F5H4R6|F5H4R6_HUMAN Nucleosome assembly protein 1-like 1 OS=Homo sapiens OX=9606 GN=NAP1L1 PE=1 SV=1;tr|H0YIV4|H0YIV4_HUMAN Nucleosome ass	597190	298	0.00641309	276570000	94	0.120974	2345000	198	0.0180313	17	14	13	69.7	31.02	264	0	220.56	279510000	33			324
Q04837;A0A0G2JLD8;E7EUY5;C9K0U8	Single-stranded DNA-binding protein, mitochondrial	SSBP1	sp|Q04837|SSBP_HUMAN Single-stranded DNA-binding protein, mitochondrial OS=Homo sapiens OX=9606 GN=SSBP1 PE=1 SV=1;tr|A0A0G2JLD8|A0A0G2JLD8_HUMAN Single-stranded DNA-binding protein, mitochondrial (Fragment) OS=Homo sapiens OX=9606 GN=SSBP1 PE=1 SV=1;tr|E7	2288700	160	0.0245778	276460000	95	0.120926	5248800	137	0.0403594	4	11	11	59.5	17.259	148	0	323.31	284000000	27			907
V9GYY3;A0A384N5Y3;F5H2F4;P11586;V9GZ78;A0A494C1T2;V9GY75	C-1-tetrahydrofolate synthase, cytoplasmic;Methylenetetrahydrofolate dehydrogenase;Methenyltetrahydrofolate cyclohydrolase;Formyltetrahydrofolate synthetase;C-1-tetrahydrofolate synthase, cytoplasmic, N-terminally processed	MTHFD1	tr|V9GYY3|V9GYY3_HUMAN C-1-tetrahydrofolate synthase, cytoplasmic OS=Homo sapiens OX=9606 GN=MTHFD1 PE=1 SV=2;tr|A0A384N5Y3|A0A384N5Y3_HUMAN C-1-tetrahydrofolate synthase, cytoplasmic OS=Homo sapiens OX=9606 GN=MTHFD1 PE=1 SV=1;tr|F5H2F4|F5H2F4_HUMAN C-1-t	3854800	137	0.0413958	273870000	96	0.119793	5447200	132	0.0418849	7	37	37	62	99.719	922	0	323.31	283170000	69			122
Q16576;E9PC52;Q5JP01;Q5JP02;Q5JNZ6;C9J7L0	Histone-binding protein RBBP7	RBBP7	sp|Q16576|RBBP7_HUMAN Histone-binding protein RBBP7 OS=Homo sapiens OX=9606 GN=RBBP7 PE=1 SV=1;tr|E9PC52|E9PC52_HUMAN Histone-binding protein RBBP7 OS=Homo sapiens OX=9606 GN=RBBP7 PE=1 SV=1;tr|Q5JP01|Q5JP01_HUMAN Histone-binding protein RBBP7 (Fragment) O	2773100	150	0.0297797	262770000	97	0.114938	6414500	121	0.0493227	6	17	11	64	47.82	425	0	193.32	271960000	38			992
O00148;K7EQN7;K7EPJ3;K7ENP6;K7EL56;K7EIL8;K7EN69;A0A0D9SEM9	ATP-dependent RNA helicase DDX39A	DDX39A	sp|O00148|DX39A_HUMAN ATP-dependent RNA helicase DDX39A OS=Homo sapiens OX=9606 GN=DDX39A PE=1 SV=2	1487800	186	0.0159771	261210000	98	0.114256	2634200	195	0.020255	8	17	7	54.3	49.129	427	0	160.98	265340000	34			476
P22314;Q5JRR6;Q5JRR9;Q5JRS0;Q5JRS1;Q5JRS3;Q5JRS2	Ubiquitin-like modifier-activating enzyme 1	UBA1	sp|P22314|UBA1_HUMAN Ubiquitin-like modifier-activating enzyme 1 OS=Homo sapiens OX=9606 GN=UBA1 PE=1 SV=3	5037900	115	0.0541009	256060000	99	0.112003	12351000	84	0.09497	7	31	31	46.3	117.85	1058	0	323.31	273450000	102			673
P67809;H0Y449;P16989;C9J5V9;Q9Y2T7;A0A0D9SEI8	Nuclease-sensitive element-binding protein 1	YBX1	sp|P67809|YBOX1_HUMAN Y-box-binding protein 1 OS=Homo sapiens OX=9606 GN=YBX1 PE=1 SV=3;tr|H0Y449|H0Y449_HUMAN Y-box-binding protein 1 (Fragment) OS=Homo sapiens OX=9606 GN=YBX1 PE=1 SV=1	0	657	0	255570000	100	0.111789	2914600	186	0.0224111	6	12	12	44.1	35.924	324	0	323.31	258490000	31			882
Q3ZCM7;A0A075B736;Q5SQY0	Tubulin beta-8 chain	TUBB8	sp|Q3ZCM7|TBB8_HUMAN Tubulin beta-8 chain OS=Homo sapiens OX=9606 GN=TUBB8 PE=1 SV=2;tr|A0A075B736|A0A075B736_HUMAN Tubulin beta chain OS=Homo sapiens OX=9606 GN=TUBB8 PE=1 SV=1;tr|Q5SQY0|Q5SQY0_HUMAN Tubulin beta chain OS=Homo sapiens OX=9606 GN=TUBB8 PE=	4145200	132	0.0445144	251610000	101	0.110057	9633000	98	0.0740706	3	12	2	24.5	49.775	444	0	25.004	265390000	17			997
P78371;F5GWF6;F8VQ14	T-complex protein 1 subunit beta	CCT2	sp|P78371|TCPB_HUMAN T-complex protein 1 subunit beta OS=Homo sapiens OX=9606 GN=CCT2 PE=1 SV=4;tr|F5GWF6|F5GWF6_HUMAN CCT-beta OS=Homo sapiens OX=9606 GN=CCT2 PE=1 SV=2;tr|F8VQ14|F8VQ14_HUMAN CCT-beta OS=Homo sapiens OX=9606 GN=CCT2 PE=1 SV=1	7959100	87	0.085471	244570000	102	0.106977	17756000	70	0.13653	3	33	33	70.5	57.488	535	0	323.31	270280000	97			891
P49368;B4DUR8;E9PRC8;Q5SZX6;E9PQ35;E9PM09;Q5SZW8;Q5SZX9	T-complex protein 1 subunit gamma	CCT3	sp|P49368|TCPG_HUMAN T-complex protein 1 subunit gamma OS=Homo sapiens OX=9606 GN=CCT3 PE=1 SV=4;tr|B4DUR8|B4DUR8_HUMAN T-complex protein 1 subunit gamma OS=Homo sapiens OX=9606 GN=CCT3 PE=1 SV=1	15106000	64	0.16222	244320000	103	0.106868	16538000	72	0.127165	8	28	28	62	60.533	545	0	323.31	275960000	79			784
P50990;H7C4C8;H7C2U0	T-complex protein 1 subunit theta	CCT8	sp|P50990|TCPQ_HUMAN T-complex protein 1 subunit theta OS=Homo sapiens OX=9606 GN=CCT8 PE=1 SV=4	17759000	58	0.19071	241610000	104	0.105683	21922000	61	0.168564	3	33	33	66.1	59.62	548	0	323.31	281290000	85			794
Q9BQA1;H0Y711	Methylosome protein 50	WDR77	sp|Q9BQA1|MEP50_HUMAN Methylosome protein 50 OS=Homo sapiens OX=9606 GN=WDR77 PE=1 SV=1	295210	393	0.00317019	240040000	105	0.104996	1042000	292	0.00801221	2	9	9	37.1	36.724	342	0	124.85	241380000	23			1127
A0A1X7SBZ2;A0A5H1ZRQ2;Q92841;A0A0U1RQJ0	Probable ATP-dependent RNA helicase DDX17	DDX17	tr|A0A1X7SBZ2|A0A1X7SBZ2_HUMAN RNA helicase OS=Homo sapiens OX=9606 GN=DDX17 PE=1 SV=1;tr|A0A5H1ZRQ2|A0A5H1ZRQ2_HUMAN RNA helicase OS=Homo sapiens OX=9606 GN=DDX17 PE=1 SV=1;sp|Q92841|DDX17_HUMAN Probable ATP-dependent RNA helicase DDX17 OS=Homo sapiens OX	7763700	90	0.0833726	238740000	106	0.104427	7353800	114	0.0565453	4	19	15	28.1	80.253	729	0	251.28	253860000	50			97
E9PKG1;Q99873;E9PIX6;E9PQ98;H0YDE4;E9PNR9;E9PMW9;Q9NR22	Protein arginine N-methyltransferase 1	PRMT1	tr|E9PKG1|E9PKG1_HUMAN Protein arginine N-methyltransferase 1 OS=Homo sapiens OX=9606 GN=PRMT1 PE=1 SV=1;sp|Q99873|ANM1_HUMAN Protein arginine N-methyltransferase 1 OS=Homo sapiens OX=9606 GN=PRMT1 PE=1 SV=3;tr|E9PIX6|E9PIX6_HUMAN Protein arginine N-methyl	663560	282	0.00712582	228360000	107	0.0998869	549640	387	0.00422632	8	19	19	65.5	37.709	325	0	223.33	229570000	38			300
O95373;E9PLB2;E9PLJ0	Importin-7	IPO7	sp|O95373|IPO7_HUMAN Importin-7 OS=Homo sapiens OX=9606 GN=IPO7 PE=1 SV=1	0	657	0	226650000	108	0.099139	1406300	256	0.0108134	3	26	25	32.5	119.52	1038	0	323.31	228050000	52			567
O75821;K7EL20;K7ER90;K7ENA8;K7EP16;K7EL60;K7ENH0	Eukaryotic translation initiation factor 3 subunit G	EIF3G	sp|O75821|EIF3G_HUMAN Eukaryotic translation initiation factor 3 subunit G OS=Homo sapiens OX=9606 GN=EIF3G PE=1 SV=2;tr|K7EL20|K7EL20_HUMAN Eukaryotic translation initiation factor 3 subunit G (Fragment) OS=Homo sapiens OX=9606 GN=EIF3G PE=1 SV=8;tr|K7ER9	316680	385	0.00340076	226060000	109	0.0988809	3574600	160	0.027486	7	16	16	62.5	35.611	320	0	246.07	229950000	33			551
Q9NQX3;F5H039;G3V582;H0YJ30;H0YJR5;G3V4R0;G3V355;G3V4D2	Gephyrin;Molybdopterin adenylyltransferase;Molybdopterin molybdenumtransferase	GPHN	sp|Q9NQX3|GEPH_HUMAN Gephyrin OS=Homo sapiens OX=9606 GN=GPHN PE=1 SV=1;tr|F5H039|F5H039_HUMAN Molybdopterin molybdenumtransferase OS=Homo sapiens OX=9606 GN=GPHN PE=1 SV=1	5002000	116	0.0537154	222730000	110	0.0974243	9648200	97	0.0741875	8	27	27	59.8	79.748	736	0	323.31	237380000	80			1167
Q13263;M0R0K9;M0R2I3;M0R3C0	Transcription intermediary factor 1-beta	TRIM28	sp|Q13263|TIF1B_HUMAN Transcription intermediary factor 1-beta OS=Homo sapiens OX=9606 GN=TRIM28 PE=1 SV=5;tr|M0R0K9|M0R0K9_HUMAN Transcription intermediary factor 1-beta (Fragment) OS=Homo sapiens OX=9606 GN=TRIM28 PE=1 SV=1	17886000	57	0.192074	222690000	111	0.0974068	25552000	54	0.196476	4	32	32	62.3	88.549	835	0	323.31	266130000	120			938
F8VPD4;P27708;H7C3Z5;H7BZB3;H7C2E4	CAD protein;Glutamine-dependent carbamoyl-phosphate synthase;Aspartate carbamoyltransferase;Dihydroorotase	CAD	tr|F8VPD4|F8VPD4_HUMAN Aspartate carbamoyltransferase OS=Homo sapiens OX=9606 GN=CAD PE=1 SV=1;sp|P27708|PYR1_HUMAN CAD protein OS=Homo sapiens OX=9606 GN=CAD PE=1 SV=3	14555000	65	0.156303	221910000	112	0.0970656	16184000	74	0.124443	5	58	58	44.1	236.02	2162	0	323.31	252650000	120			331
Q08211	ATP-dependent RNA helicase A	DHX9	sp|Q08211|DHX9_HUMAN ATP-dependent RNA helicase A OS=Homo sapiens OX=9606 GN=DHX9 PE=1 SV=4	3270600	142	0.0351222	216620000	113	0.0947517	4900500	143	0.0376812	1	30	30	32.4	140.96	1270	0	307.13	224790000	62			913
Q9UBQ5;K7EQM4;A0A087WVB9;K7ERF1;K7ES31;B4DQ48;K7EK53	Eukaryotic translation initiation factor 3 subunit K	EIF3K	sp|Q9UBQ5|EIF3K_HUMAN Eukaryotic translation initiation factor 3 subunit K OS=Homo sapiens OX=9606 GN=EIF3K PE=1 SV=1;tr|K7EQM4|K7EQM4_HUMAN Eukaryotic translation initiation factor 3 subunit K (Fragment) OS=Homo sapiens OX=9606 GN=EIF3K PE=1 SV=1;tr|A0A08	0	657	0	215770000	114	0.0943799	0	627	0	7	8	8	56.4	25.059	218	0	209.95	215770000	21			1193
P11142;E9PKE3;E9PNE6;E9PN89;E9PLF4;E9PQQ4;E9PQK7;E9PK54;A8K7Q2;E9PPY6;E9PI65;E9PN25;P54652;E9PS65;E9PM13	Heat shock cognate 71 kDa protein	HSPA8	sp|P11142|HSP7C_HUMAN Heat shock cognate 71 kDa protein OS=Homo sapiens OX=9606 GN=HSPA8 PE=1 SV=1;tr|E9PKE3|E9PKE3_HUMAN Heat shock cognate 71 kDa protein OS=Homo sapiens OX=9606 GN=HSPA8 PE=1 SV=1;tr|E9PNE6|E9PNE6_HUMAN Heat shock cognate 71 kDa protein	4519700	122	0.048536	215460000	115	0.0942443	5418300	133	0.0416627	15	26	22	46.6	70.897	646	0	281.43	225390000	50			619
Q8TEX9;H0YN14;H0YMR4;H0YN07;H0YLV0;H0YL92;H0YKG5;H0YK93	Importin-4	IPO4	sp|Q8TEX9|IPO4_HUMAN Importin-4 OS=Homo sapiens OX=9606 GN=IPO4 PE=1 SV=2;tr|H0YN14|H0YN14_HUMAN Importin-4 OS=Homo sapiens OX=9606 GN=IPO4 PE=1 SV=1	1112300	213	0.0119447	210740000	116	0.0921798	3223300	175	0.0247848	8	26	26	37.7	118.71	1081	0	249.17	215070000	44			1072
Q13200;H7C1H2;C9JPC0;H7C2Q3	26S proteasome non-ATPase regulatory subunit 2	PSMD2	sp|Q13200|PSMD2_HUMAN 26S proteasome non-ATPase regulatory subunit 2 OS=Homo sapiens OX=9606 GN=PSMD2 PE=1 SV=3	5879000	105	0.0631333	205470000	117	0.0898746	14124000	78	0.108603	4	34	34	46.7	100.2	908	0	323.31	225470000	97			937
P53621;A0A3B3IS84;A0A3B3IT15;A0A3B3ISC6;A0A3B3IU89;A0A3B3ITV3;A0A3B3ITI7;A0A3B3ISK1;A0A3B3IU78;A0A3B3ITX2;A0A3B3IU84;A0A3B3IS23	Coatomer subunit alpha;Xenin;Proxenin	COPA	sp|P53621|COPA_HUMAN Coatomer subunit alpha OS=Homo sapiens OX=9606 GN=COPA PE=1 SV=2;tr|A0A3B3IS84|A0A3B3IS84_HUMAN Coatomer subunit alpha OS=Homo sapiens OX=9606 GN=COPA PE=1 SV=1;tr|A0A3B3IT15|A0A3B3IT15_HUMAN Coatomer subunit alpha OS=Homo sapiens OX=9	1223800	209	0.0131421	205310000	118	0.0898046	2678500	193	0.0205957	12	28	28	35	138.34	1224	0	250.03	209210000	51			815
Q02790;F5H1U3;F5H120;H0YFG2	Peptidyl-prolyl cis-trans isomerase FKBP4;Peptidyl-prolyl cis-trans isomerase FKBP4, N-terminally processed	FKBP4	sp|Q02790|FKBP4_HUMAN Peptidyl-prolyl cis-trans isomerase FKBP4 OS=Homo sapiens OX=9606 GN=FKBP4 PE=1 SV=3	4194700	131	0.0450459	202970000	119	0.0887811	5080500	138	0.0390653	4	17	17	43.4	51.804	459	0	323.31	212240000	50			903
P12270;Q5SWX9	Nucleoprotein TPR	TPR	sp|P12270|TPR_HUMAN Nucleoprotein TPR OS=Homo sapiens OX=9606 GN=TPR PE=1 SV=3	78244	598	0.000840245	200440000	120	0.0876745	2751000	191	0.0211531	2	41	41	23.1	267.29	2363	0	323.31	203270000	65			626
Q9BVA1	Tubulin beta-2B chain	TUBB2B	sp|Q9BVA1|TBB2B_HUMAN Tubulin beta-2B chain OS=Homo sapiens OX=9606 GN=TUBB2B PE=1 SV=1	5896900	104	0.0633255	198410000	121	0.0867865	6362800	123	0.0489252	1	35	2	80.4	49.953	445	0	160.79	210670000	29			1136
O60763	General vesicular transport factor p115	USO1	sp|O60763|USO1_HUMAN General vesicular transport factor p115 OS=Homo sapiens OX=9606 GN=USO1 PE=1 SV=2	1728100	182	0.0185577	196020000	122	0.0857411	3404000	167	0.0261742	1	27	27	39	107.89	962	0	271.86	201150000	52			535
Q9UQ80;F8VR77;F8W0A3;H0YIN7;F8VZ69	Proliferation-associated protein 2G4	PA2G4	sp|Q9UQ80|PA2G4_HUMAN Proliferation-associated protein 2G4 OS=Homo sapiens OX=9606 GN=PA2G4 PE=1 SV=3;tr|F8VR77|F8VR77_HUMAN Proliferation-associated protein 2G4 OS=Homo sapiens OX=9606 GN=PA2G4 PE=1 SV=1	899680	242	0.00966146	193350000	123	0.0845732	2653800	194	0.0204058	5	13	13	51	43.786	394	0	152.72	196900000	37			1222
Q93008;O00507;H7C2M9	Probable ubiquitin carboxyl-terminal hydrolase FAF-X	USP9X	sp|Q93008|USP9X_HUMAN Probable ubiquitin carboxyl-terminal hydrolase FAF-X OS=Homo sapiens OX=9606 GN=USP9X PE=1 SV=4	2305100	159	0.024754	192770000	124	0.0843195	2434500	197	0.0187195	3	44	44	23.6	290.46	2554	0	323.31	197510000	76			1090
P13010;C9JZ81;H7C0H9	X-ray repair cross-complementing protein 5	XRCC5	sp|P13010|XRCC5_HUMAN X-ray repair cross-complementing protein 5 OS=Homo sapiens OX=9606 GN=XRCC5 PE=1 SV=3	4118100	133	0.0442234	192390000	125	0.0841533	2561600	196	0.0196968	3	28	28	54.4	82.704	732	0	226.35	199070000	60			631
P23396;E9PL09;E9PPU1;H0YEU2;F2Z2S8;H0YCJ7;H0YF32;E9PQ96;E9PSF4;E9PJH4;E9PK82;E9PQX2	40S ribosomal protein S3	RPS3	sp|P23396|RS3_HUMAN 40S ribosomal protein S3 OS=Homo sapiens OX=9606 GN=RPS3 PE=1 SV=2;tr|E9PL09|E9PL09_HUMAN 40S ribosomal protein S3 OS=Homo sapiens OX=9606 GN=RPS3 PE=1 SV=1;tr|E9PPU1|E9PPU1_HUMAN 40S ribosomal protein S3 OS=Homo sapiens OX=9606 GN=RPS3	4321600	126	0.0464087	189240000	126	0.0827755	6201700	124	0.0476865	12	13	13	60.5	26.688	243	0	199.49	199760000	33			679
P05067;A0A0A0MRG2;E9PG40;H7C0V9	Amyloid beta A4 protein;N-APP;Soluble APP-alpha;Soluble APP-beta;C99;Beta-amyloid protein 42;Beta-amyloid protein 40;C83;P3(42);P3(40);C80;Gamma-secretase C-terminal fragment 59;Gamma-secretase C-terminal fragment 57;Gamma-secretase C-terminal fragment 50;C31	APP	sp|P05067|A4_HUMAN Amyloid-beta precursor protein OS=Homo sapiens OX=9606 GN=APP PE=1 SV=3;tr|A0A0A0MRG2|A0A0A0MRG2_HUMAN ABPP OS=Homo sapiens OX=9606 GN=APP PE=1 SV=1;tr|E9PG40|E9PG40_HUMAN ABPP OS=Homo sapiens OX=9606 GN=APP PE=1 SV=1;tr|H7C0V9|H7C0V9_HU	152920	501	0.00164217	184460000	127	0.0806846	1490300	245	0.0114593	4	15	15	28.1	86.942	770	0	159.35	186100000	31			582
P04181	Ornithine aminotransferase, mitochondrial;Ornithine aminotransferase, hepatic form;Ornithine aminotransferase, renal form	OAT	sp|P04181|OAT_HUMAN Ornithine aminotransferase, mitochondrial OS=Homo sapiens OX=9606 GN=OAT PE=1 SV=1	397350	343	0.00426705	176040000	128	0.0770016	1228500	268	0.00944625	1	17	17	60.1	48.534	439	0	154.75	177670000	30			578
P12956;B1AHC9	X-ray repair cross-complementing protein 6	XRCC6	sp|P12956|XRCC6_HUMAN X-ray repair cross-complementing protein 6 OS=Homo sapiens OX=9606 GN=XRCC6 PE=1 SV=2;tr|B1AHC9|B1AHC9_HUMAN ATP-dependent DNA helicase 2 subunit 1 OS=Homo sapiens OX=9606 GN=XRCC6 PE=1 SV=1	4699900	121	0.0504712	172970000	129	0.0756588	3168000	177	0.0243596	2	32	32	56.3	69.842	609	0	323.31	180840000	64			630
Q14697;F5H6X6;E9PKU7;E9PNH1	Neutral alpha-glucosidase AB	GANAB	sp|Q14697|GANAB_HUMAN Neutral alpha-glucosidase AB OS=Homo sapiens OX=9606 GN=GANAB PE=1 SV=3;tr|F5H6X6|F5H6X6_HUMAN Neutral alpha-glucosidase AB OS=Homo sapiens OX=9606 GN=GANAB PE=1 SV=1;tr|E9PKU7|E9PKU7_HUMAN Neutral alpha-glucosidase AB OS=Homo sapiens	1277400	204	0.0137177	172150000	130	0.0753001	4497800	147	0.0345847	4	19	19	31.6	106.87	944	0	153.07	177930000	37			963
P61978;Q5T6W2;S4R359;S4R457	Heterogeneous nuclear ribonucleoprotein K	HNRNPK	sp|P61978|HNRPK_HUMAN Heterogeneous nuclear ribonucleoprotein K OS=Homo sapiens OX=9606 GN=HNRNPK PE=1 SV=1;tr|Q5T6W2|Q5T6W2_HUMAN Heterogeneous nuclear ribonucleoprotein K (Fragment) OS=Homo sapiens OX=9606 GN=HNRNPK PE=1 SV=1	1115700	212	0.0119813	171890000	131	0.0751864	1039300	293	0.00799144	4	12	12	40.8	50.976	463	0	275.8	174040000	29			846
P33993;C9J8M6	DNA replication licensing factor MCM7	MCM7	sp|P33993|MCM7_HUMAN DNA replication licensing factor MCM7 OS=Homo sapiens OX=9606 GN=MCM7 PE=1 SV=4	1922100	172	0.020641	171340000	132	0.0749458	2053800	215	0.0157922	2	22	22	41.3	81.307	719	0	291.06	175320000	41			727
P24534;C9JZW3;F2Z2G2;F8WF65	Elongation factor 1-beta	EEF1B2	sp|P24534|EF1B_HUMAN Elongation factor 1-beta OS=Homo sapiens OX=9606 GN=EEF1B2 PE=1 SV=3;tr|C9JZW3|C9JZW3_HUMAN Elongation factor 1-beta (Fragment) OS=Homo sapiens OX=9606 GN=EEF1B2 PE=1 SV=1;tr|F2Z2G2|F2Z2G2_HUMAN Elongation factor 1-beta OS=Homo sapiens	1958400	169	0.0210308	171020000	133	0.0748059	3393300	168	0.026092	4	6	5	54.2	24.763	225	0	68.08	176370000	29			683
O15355	Protein phosphatase 1G	PPM1G	sp|O15355|PPM1G_HUMAN Protein phosphatase 1G OS=Homo sapiens OX=9606 GN=PPM1G PE=1 SV=1	588680	302	0.0063217	170400000	134	0.0745347	4955400	141	0.0381033	1	15	15	44.3	59.271	546	0	323.31	175940000	41			506
O75822;H0YGJ7;H0YLP3	Eukaryotic translation initiation factor 3 subunit J	EIF3J	sp|O75822|EIF3J_HUMAN Eukaryotic translation initiation factor 3 subunit J OS=Homo sapiens OX=9606 GN=EIF3J PE=1 SV=2;tr|H0YGJ7|H0YGJ7_HUMAN Eukaryotic translation initiation factor 3 30 kDa subunit (Fragment) OS=Homo sapiens OX=9606 GN=EIF3J PE=1 SV=1	181030	465	0.00194404	170070000	135	0.0743903	1691500	232	0.0130064	3	9	9	48.4	29.062	258	0	115.24	171950000	24			552
O00267;M0QYL9	Transcription elongation factor SPT5	SUPT5H	sp|O00267|SPT5H_HUMAN Transcription elongation factor SPT5 OS=Homo sapiens OX=9606 GN=SUPT5H PE=1 SV=1	0	657	0	168590000	136	0.0737429	264510	507	0.00203389	2	23	23	30.5	121	1087	0	323.31	168860000	35			483
F8W914;H7C106;A0A0U1RQR6	Reticulon	RTN4	tr|F8W914|F8W914_HUMAN Reticulon OS=Homo sapiens OX=9606 GN=RTN4 PE=1 SV=1	4014600	134	0.0431119	166680000	137	0.0729075	4919400	142	0.0378265	3	7	1	38.6	37.144	345	0	258.03	175610000	27			342
Q9C0C9;K7ES11;K7EQ12	E2/E3 hybrid ubiquitin-protein ligase UBE2O	UBE2O	sp|Q9C0C9|UBE2O_HUMAN (E3-independent) E2 ubiquitin-conjugating enzyme OS=Homo sapiens OX=9606 GN=UBE2O PE=1 SV=3;tr|K7ES11|K7ES11_HUMAN (E3-independent) E2 ubiquitin-conjugating enzyme (Fragment) OS=Homo sapiens OX=9606 GN=UBE2O PE=1 SV=1	577500	308	0.00620164	164210000	138	0.0718271	4238100	149	0.0325878	3	21	21	26.2	141.29	1292	0	189.94	169030000	39			1145
P46060;H0Y4Q3;B0QYT5;B0QYT4	Ran GTPase-activating protein 1	RANGAP1	sp|P46060|RAGP1_HUMAN Ran GTPase-activating protein 1 OS=Homo sapiens OX=9606 GN=RANGAP1 PE=1 SV=1	0	657	0	163060000	139	0.0713241	843590	316	0.00648658	4	19	19	44.6	63.541	587	0	323.31	163900000	29			765
Q16643;D6R9W4;D6R9Q9;D6RFI1;D6RCR4	Drebrin	DBN1	sp|Q16643|DREB_HUMAN Drebrin OS=Homo sapiens OX=9606 GN=DBN1 PE=1 SV=4;tr|D6R9W4|D6R9W4_HUMAN Drebrin (Fragment) OS=Homo sapiens OX=9606 GN=DBN1 PE=1 SV=1	1393600	193	0.0149656	161450000	140	0.0706198	2096400	211	0.0161198	5	17	17	49.2	71.428	649	0	168.58	164940000	34			993
A0A0U1RR32;A0A0U1RRH7;Q99878;Q96KK5;Q9BTM1;P20671;P0C0S8;H0YFX9;Q16777;Q6FI13;A0A3B3IS11;C9J0D1;A0A494C189;Q71UI9;P0C0S5;C9J386	Histone H2A type 1-J;Histone H2A type 1-H;Histone H2A.J;Histone H2A type 1-D;Histone H2A type 1;Histone H2A;Histone H2A type 2-C;Histone H2A type 2-A	HIST1H2AJ;HIST1H2AH;H2AFJ;HIST1H2AD;HIST1H2AG;HIST2H2AC;HIST2H2AA3	tr|A0A0U1RR32|A0A0U1RR32_HUMAN Histone H2A OS=Homo sapiens OX=9606 GN=hCG_2039566 PE=3 SV=1;tr|A0A0U1RRH7|A0A0U1RRH7_HUMAN Histone H2A OS=Homo sapiens OX=9606 PE=3 SV=1;sp|Q99878|H2A1J_HUMAN Histone H2A type 1-J OS=Homo sapiens OX=9606 GN=H2AC14 PE=1 SV=3;	5536700	108	0.0594574	159420000	141	0.0697319	6017800	126	0.0462724	16	6	2	44.4	18.481	169	0	134.43	170970000	20			85
P35606;D6R997;D6RBZ7;D6RCL6;D6RBG7;D6RBT6;H0YAC7;H0Y938	Coatomer subunit beta	COPB2	sp|P35606|COPB2_HUMAN Coatomer subunit beta OS=Homo sapiens OX=9606 GN=COPB2 PE=1 SV=2	2000800	166	0.0214861	159210000	142	0.06964	1697700	231	0.0130541	8	24	24	36.9	102.49	906	0	323.31	162910000	62			733
B8ZZQ6;P06454;B8ZZA1;B8ZZW7;H7C2N1	Prothymosin alpha;Prothymosin alpha, N-terminally processed;Thymosin alpha-1	PTMA	tr|B8ZZQ6|B8ZZQ6_HUMAN Prothymosin alpha OS=Homo sapiens OX=9606 GN=PTMA PE=1 SV=1;sp|P06454|PTMA_HUMAN Prothymosin alpha OS=Homo sapiens OX=9606 GN=PTMA PE=1 SV=2;tr|B8ZZA1|B8ZZA1_HUMAN Prothymosin alpha OS=Homo sapiens OX=9606 GN=PTMA PE=1 SV=1;tr|B8ZZW7	0	657	0	158370000	143	0.0692726	0	627	0	5	3	3	27.1	11.758	107	0	72.017	158370000	3			208
E7EX73;E9PGM1;E7EUU4;Q04637;C9JF13;C9J6B6;C9K073;C9J2Z7;H7C0V6;H7C044;A0A6Q8PFB2;A0A0A0MSA7;A0A0U1RQK7;O43432;F8WCF2;C9JHW9;C9JWH7;C9J556;C9JSU8;C9JWW9	Eukaryotic translation initiation factor 4 gamma 1	EIF4G1	tr|E7EX73|E7EX73_HUMAN Eukaryotic translation initiation factor 4 gamma 1 OS=Homo sapiens OX=9606 GN=EIF4G1 PE=1 SV=1;tr|E9PGM1|E9PGM1_HUMAN Eukaryotic translation initiation factor 4 gamma 1 OS=Homo sapiens OX=9606 GN=EIF4G1 PE=1 SV=1;tr|E7EUU4|E7EUU4_HUM	1252100	207	0.013446	157590000	144	0.0689314	4226100	150	0.0324956	20	29	29	28.6	158.64	1436	0	323.31	163070000	53			277
P22102;C9JZG2;C9JKQ7;C9JBJ1;C9JTV6;F8WD69;A0A140TA71	Trifunctional purine biosynthetic protein adenosine-3;Phosphoribosylamine--glycine ligase;Phosphoribosylformylglycinamidine cyclo-ligase;Phosphoribosylglycinamide formyltransferase	GART	sp|P22102|PUR2_HUMAN Trifunctional purine biosynthetic protein adenosine-3 OS=Homo sapiens OX=9606 GN=GART PE=1 SV=1	359950	355	0.00386542	157010000	145	0.0686777	1733400	229	0.0133286	7	25	25	33.5	107.77	1010	0	214.57	159100000	41			671
P50991	T-complex protein 1 subunit delta	CCT4	sp|P50991|TCPD_HUMAN T-complex protein 1 subunit delta OS=Homo sapiens OX=9606 GN=CCT4 PE=1 SV=4	8396900	83	0.0901724	155510000	146	0.0680216	17974000	68	0.138207	1	23	23	56.6	57.924	539	0	323.31	181880000	70			795
Q86VP6;A0A0C4DGH5;H0YH27	Cullin-associated NEDD8-dissociated protein 1	CAND1	sp|Q86VP6|CAND1_HUMAN Cullin-associated NEDD8-dissociated protein 1 OS=Homo sapiens OX=9606 GN=CAND1 PE=1 SV=2;tr|A0A0C4DGH5|A0A0C4DGH5_HUMAN Cullin-associated NEDD8-dissociated protein 1 (Fragment) OS=Homo sapiens OX=9606 GN=CAND1 PE=1 SV=1	3310300	141	0.0355486	154700000	147	0.0676673	3339000	170	0.0256744	3	26	26	32.3	136.37	1230	0	309.22	161350000	53			1048
Q14974;J3KTM9;J3QR48;J3QKQ5;J3QRG4	Importin subunit beta-1	KPNB1	sp|Q14974|IMB1_HUMAN Importin subunit beta-1 OS=Homo sapiens OX=9606 GN=KPNB1 PE=1 SV=2;tr|J3KTM9|J3KTM9_HUMAN Importin subunit beta-1 (Fragment) OS=Homo sapiens OX=9606 GN=KPNB1 PE=1 SV=1	7250800	93	0.0778647	153720000	148	0.0672387	9321400	100	0.0716746	5	20	20	32.6	97.169	876	0	236.05	170290000	56			964
P09874;Q5VX84;Q5VX85	Poly [ADP-ribose] polymerase 1	PARP1	sp|P09874|PARP1_HUMAN Poly [ADP-ribose] polymerase 1 OS=Homo sapiens OX=9606 GN=PARP1 PE=1 SV=4	0	657	0	152490000	149	0.0667006	742000	344	0.00570543	3	22	22	30.2	113.08	1014	0	225.45	153230000	33			608
A0A286YF22;O43175;A0A2C9F2M7;A0A286YFA2;A0A286YFL2;A0A286YFM8;A0A286YER3;A0A286YFC8;A0A286YFB2;A0A286YF34;A0A286YF78;A0A286YFF3;A0A286YFK5;A0A286YFE1	D-3-phosphoglycerate dehydrogenase	PHGDH	tr|A0A286YF22|A0A286YF22_HUMAN D-3-phosphoglycerate dehydrogenase OS=Homo sapiens OX=9606 GN=PHGDH PE=1 SV=1;sp|O43175|SERA_HUMAN D-3-phosphoglycerate dehydrogenase OS=Homo sapiens OX=9606 GN=PHGDH PE=1 SV=4;tr|A0A2C9F2M7|A0A2C9F2M7_HUMAN D-3-phosphoglycer	863830	250	0.00927648	150940000	150	0.0660227	3275700	173	0.0251877	14	15	15	41.6	55.938	526	0	157.19	155080000	30			98
P04264;CON__P04264	Keratin, type II cytoskeletal 1	KRT1	sp|P04264|K2C1_HUMAN Keratin, type II cytoskeletal 1 OS=Homo sapiens OX=9606 GN=KRT1 PE=1 SV=6;	21419000	50	0.230014	150830000	151	0.0659745	16233000	73	0.12482	2	24	16	38.4	66.038	644	0	323.31	188490000	59		+	579
lcl|NC_017825.1_prot_YP_006272955.1_7	TP	db_xref=GeneID:12657141	lcl|NC_017825.1_prot_YP_006272955.1_7 [locus_tag=YOE_gp07] [db_xref=GeneID:12657141] [protein=pTP] [protein_id=YP_006272955.1] [location=complement(join(8461..10392,13838..13846))] [gbkey=CDS]	11997000	71	0.128833	150710000	152	0.0659221	13202000	80	0.101514	1	28	28	52.9	74.389	646	0	282.54	175910000	81			446
E7EX90;Q14203;Q6AWB1;E7EWF7;C9JZA4;C9JTE5;C9JJN7;C9JJD0;C9JKG6;E9PCY0;C9J1B7	Dynactin subunit 1	DCTN1;DKFZp686E0752	tr|E7EX90|E7EX90_HUMAN Dynactin subunit 1 OS=Homo sapiens OX=9606 GN=DCTN1 PE=1 SV=1;sp|Q14203|DCTN1_HUMAN Dynactin subunit 1 OS=Homo sapiens OX=9606 GN=DCTN1 PE=1 SV=3;tr|Q6AWB1|Q6AWB1_HUMAN Dynactin subunit 1 OS=Homo sapiens OX=9606 GN=DCTN1 PE=1 SV=1	2500300	153	0.0268502	150110000	153	0.0656596	4225800	151	0.0324933	11	30	30	35.3	139.09	1256	0	323.31	156830000	64			281
P48643;E7ENZ3;B7ZAR1;E9PCA1;D6RIZ7;H0Y914	T-complex protein 1 subunit epsilon	CCT5	sp|P48643|TCPE_HUMAN T-complex protein 1 subunit epsilon OS=Homo sapiens OX=9606 GN=CCT5 PE=1 SV=1;tr|E7ENZ3|E7ENZ3_HUMAN T-complex protein 1 subunit epsilon OS=Homo sapiens OX=9606 GN=CCT5 PE=1 SV=1;tr|B7ZAR1|B7ZAR1_HUMAN T-complex protein 1 subunit epsil	11035000	73	0.118502	149200000	154	0.0652616	18054000	67	0.138822	6	25	25	65.2	59.67	541	0	323.31	178280000	83			778
Q01813;B1APP6;H0Y757;Q5VSR5;V9GY25;V9GYV7;H0Y3Y3	ATP-dependent 6-phosphofructokinase, platelet type	PFKP	sp|Q01813|PFKAP_HUMAN ATP-dependent 6-phosphofructokinase, platelet type OS=Homo sapiens OX=9606 GN=PFKP PE=1 SV=2;tr|B1APP6|B1APP6_HUMAN ATP-dependent 6-phosphofructokinase, platelet type OS=Homo sapiens OX=9606 GN=PFKP PE=1 SV=2	1374800	196	0.0147637	146180000	155	0.0639406	3182500	176	0.0244711	7	26	24	46.4	85.595	784	0	323.31	150740000	40			900
Q5TCU3;P07951;CON__Q3SX28;A7XZE4	Tropomyosin beta chain	TPM2;TPM2b	tr|Q5TCU3|Q5TCU3_HUMAN Tropomyosin beta chain OS=Homo sapiens OX=9606 GN=TPM2 PE=1 SV=1;sp|P07951|TPM2_HUMAN Tropomyosin beta chain OS=Homo sapiens OX=9606 GN=TPM2 PE=1 SV=1;;tr|A7XZE4|A7XZE4_HUMAN Beta tropomyosin isoform OS=Homo sapiens OX=9606 GN=TPM2 P	4989000	117	0.0535757	145420000	156	0.0636082	8433600	105	0.0648481	4	14	3	29.6	32.814	284	0	66.876	158840000	6		+	600
P46821;D6RA32;D6RA40;D6RCL2;D6RGJ3;P78559	Microtubule-associated protein 1B;MAP1B heavy chain;MAP1 light chain LC1	MAP1B	sp|P46821|MAP1B_HUMAN Microtubule-associated protein 1B OS=Homo sapiens OX=9606 GN=MAP1B PE=1 SV=2	4499100	123	0.0483148	144060000	157	0.0630133	8227400	107	0.0632626	6	48	47	32.8	270.63	2468	0	323.31	156790000	104			771
P62244;I3L3P7;I3L246;H3BN98;H3BVC7;H3BV27;H3BT37;I3L303	40S ribosomal protein S15a	RPS15A	sp|P62244|RS15A_HUMAN 40S ribosomal protein S15a OS=Homo sapiens OX=9606 GN=RPS15A PE=1 SV=2;tr|I3L3P7|I3L3P7_HUMAN 40S ribosomal protein S15a OS=Homo sapiens OX=9606 GN=RPS15A PE=1 SV=1;tr|I3L246|I3L246_HUMAN 40S ribosomal protein S15a OS=Homo sapiens OX=	1446600	189	0.0155347	143770000	158	0.0628864	0	627	0	8	8	8	59.2	14.839	130	0	105.03	145210000	15			853
P12532;F8WCN3;C9JSQ1;C9J6W7;C9JT96;C9J995;C9J8F6;C9JJX8;P17540	Creatine kinase U-type, mitochondrial	CKMT1A;CKMT1B	sp|P12532|KCRU_HUMAN Creatine kinase U-type, mitochondrial OS=Homo sapiens OX=9606 GN=CKMT1A PE=1 SV=1;tr|F8WCN3|F8WCN3_HUMAN Creatine kinase OS=Homo sapiens OX=9606 GN=CKMT1A PE=1 SV=1	845850	253	0.00908339	143470000	159	0.0627552	2148600	209	0.0165211	9	13	13	51.1	47.036	417	0	231.77	146460000	29			628
G8JLB6;P31943;E9PCY7;H0YB39;D6RIT2;D6RIU0;D6RBM0;E7EQJ0;D6RAM1;E5RGV0;D6R9T0;D6RFM3;E7EN40;D6RDU3;D6RJ04;D6RIH9;H0YBG7;H0YBD7;D6RDL0;D6R9D3;D6RF17;E5RGH4;H0YAQ2	Heterogeneous nuclear ribonucleoprotein H;Heterogeneous nuclear ribonucleoprotein H, N-terminally processed	HNRNPH1	tr|G8JLB6|G8JLB6_HUMAN Heterogeneous nuclear ribonucleoprotein H OS=Homo sapiens OX=9606 GN=HNRNPH1 PE=1 SV=1;sp|P31943|HNRH1_HUMAN Heterogeneous nuclear ribonucleoprotein H OS=Homo sapiens OX=9606 GN=HNRNPH1 PE=1 SV=4;tr|E9PCY7|E9PCY7_HUMAN Heterogeneous	3221600	144	0.034596	140920000	160	0.0616398	3110600	178	0.0239182	23	10	5	30.9	51.229	472	0	277.64	147250000	30			359
P10155;G5E9R9;H0Y9N5;D6RDN1;D6RE09	60 kDa SS-A/Ro ribonucleoprotein	TROVE2	sp|P10155|RO60_HUMAN 60 kDa SS-A/Ro ribonucleoprotein OS=Homo sapiens OX=9606 GN=RO60 PE=1 SV=2	336100	366	0.0036093	138830000	161	0.0607256	1672800	236	0.0128626	5	15	15	38.8	60.67	538	0	115.06	140840000	27			611
Q8N163;H0YB24;G3V119;E5RHJ4;A0A087X2B6;E5RFJ3;H0YC69;E5RGU7;H0YC58;E5RHH8	Cell cycle and apoptosis regulator protein 2	CCAR2	sp|Q8N163|CCAR2_HUMAN Cell cycle and apoptosis regulator protein 2 OS=Homo sapiens OX=9606 GN=CCAR2 PE=1 SV=2;tr|H0YB24|H0YB24_HUMAN Cell cycle and apoptosis regulator protein 2 (Fragment) OS=Homo sapiens OX=9606 GN=CCAR2 PE=1 SV=1;tr|G3V119|G3V119_HUMAN C	1294200	202	0.0138981	138610000	162	0.0606294	4169600	152	0.0320611	10	19	19	33.4	102.9	923	0	183.44	144080000	40			1056
P62701;C9JEH7;Q8TD47;P22090	40S ribosomal protein S4, X isoform	RPS4X	sp|P62701|RS4X_HUMAN 40S ribosomal protein S4, X isoform OS=Homo sapiens OX=9606 GN=RPS4X PE=1 SV=2	1428100	191	0.015336	138420000	163	0.0605463	1470900	248	0.0113101	4	11	11	37.6	29.597	263	0	92.535	141320000	22			862
P19338;H7BY16	Nucleolin	NCL	sp|P19338|NUCL_HUMAN Nucleolin OS=Homo sapiens OX=9606 GN=NCL PE=1 SV=3	0	657	0	135290000	164	0.0591772	0	627	0	2	13	13	19.4	76.613	710	0	126.55	135290000	22			657
P06493;A0A024QZP7;A0A087WZZ9;E5RIU6;K7ELV5;Q00526;G3V317;F8VXD2;A0A2R8YEB7;F8VYH9;F8VZZ0;F8VTV8;F8VWX7;F8VZ51;K7EJ83;A0A2R8Y644;H0YAZ9;Q9BVE2;E7EUK8;E5RGN0;A0A087X209;A0A087WZU2;A0A2R8YD28;F5H6Z0;A0A2R8YF61;A0A2R8Y7W5;J3QSD7;A0A2R8Y4Z0;P11802;Q00534;P50750;Q96Q40;O94921;Q07002;Q00536;Q00537;Q9NYV4;Q14004	Cyclin-dependent kinase 1	CDK1;CDC2	sp|P06493|CDK1_HUMAN Cyclin-dependent kinase 1 OS=Homo sapiens OX=9606 GN=CDK1 PE=1 SV=3;tr|A0A024QZP7|A0A024QZP7_HUMAN Cell division cycle 2, G1 to S and G2 to M, isoform CRA_a OS=Homo sapiens OX=9606 GN=CDK1 PE=1 SV=1;tr|A0A087WZZ9|A0A087WZZ9_HUMAN Cycli	3255400	143	0.034959	134860000	165	0.0589891	2733300	192	0.021017	38	15	13	58.2	34.095	297	0	190.34	140850000	34			589
P30050	60S ribosomal protein L12	RPL12	sp|P30050|RL12_HUMAN 60S ribosomal protein L12 OS=Homo sapiens OX=9606 GN=RPL12 PE=1 SV=1	1793700	179	0.0192621	130890000	166	0.0572526	3523800	163	0.0270954	1	7	7	58.8	17.818	165	0	85.828	136200000	24			711
Q9HC35;B5MBZ0	Echinoderm microtubule-associated protein-like 4	EML4	sp|Q9HC35|EMAL4_HUMAN Echinoderm microtubule-associated protein-like 4 OS=Homo sapiens OX=9606 GN=EML4 PE=1 SV=3;tr|B5MBZ0|B5MBZ0_HUMAN Echinoderm microtubule-associated protein-like 4 OS=Homo sapiens OX=9606 GN=EML4 PE=1 SV=3	1366900	198	0.0146788	130710000	167	0.0571739	1537300	242	0.0118207	2	21	21	31.3	108.91	981	0	203.78	133610000	45			1162
P51858;H3BPQ6;M0R0J3;Q9Y3E1;O75475;Q7Z4V5	Hepatoma-derived growth factor	HDGF	sp|P51858|HDGF_HUMAN Hepatoma-derived growth factor OS=Homo sapiens OX=9606 GN=HDGF PE=1 SV=1	168250	478	0.0018068	128630000	168	0.056264	3770300	158	0.0289908	6	13	13	58.8	26.788	240	0	261.1	132570000	28			801
O00231;J3QRY4;J3KSW3;J3QS13	26S proteasome non-ATPase regulatory subunit 11	PSMD11	sp|O00231|PSD11_HUMAN 26S proteasome non-ATPase regulatory subunit 11 OS=Homo sapiens OX=9606 GN=PSMD11 PE=1 SV=3	5997300	103	0.0644037	127750000	169	0.0558791	7212000	117	0.0554549	4	15	15	41	47.463	422	0	214.66	140960000	48			480
O43852;H0Y875	Calumenin	CALU	sp|O43852|CALU_HUMAN Calumenin OS=Homo sapiens OX=9606 GN=CALU PE=1 SV=2;tr|H0Y875|H0Y875_HUMAN Calumenin (Fragment) OS=Homo sapiens OX=9606 GN=CALU PE=1 SV=1	0	657	0	127200000	170	0.0556385	0	627	0	2	11	11	51.7	37.106	315	0	102.43	127200000	25			521
Q99832;F8WAM2;F8WBP8;A0A0D9SG95	T-complex protein 1 subunit eta	CCT7	sp|Q99832|TCPH_HUMAN T-complex protein 1 subunit eta OS=Homo sapiens OX=9606 GN=CCT7 PE=1 SV=2	10139000	77	0.10888	126540000	171	0.0553499	14483000	77	0.111364	4	30	30	61.7	59.366	543	0	323.31	151160000	92			1123
P62195;J3QSA9;J3QQM1;J3KRP2;J3QLH6;J3QSE0;J3QRW1;J3QRR3;J3KTQ9;A0A6Q8PGU6;Q8NB90	26S protease regulatory subunit 8	PSMC5	sp|P62195|PRS8_HUMAN 26S proteasome regulatory subunit 8 OS=Homo sapiens OX=9606 GN=PSMC5 PE=1 SV=1;tr|J3QSA9|J3QSA9_HUMAN 26S proteasome regulatory subunit 8 (Fragment) OS=Homo sapiens OX=9606 GN=PSMC5 PE=1 SV=1;tr|J3QQM1|J3QQM1_HUMAN 26S proteasome regul	5288500	110	0.056792	125150000	172	0.0547419	8881800	103	0.0682944	11	22	22	58.1	45.626	406	0	323.31	139320000	58			851
B5MDF5;P62826;F5H018;J3KQE5;B4DV51;H0YFC6;A0A087X0W0	GTP-binding nuclear protein Ran	RAN	tr|B5MDF5|B5MDF5_HUMAN GTP-binding nuclear protein Ran OS=Homo sapiens OX=9606 GN=RAN PE=1 SV=1;sp|P62826|RAN_HUMAN GTP-binding nuclear protein Ran OS=Homo sapiens OX=9606 GN=RAN PE=1 SV=3;tr|F5H018|F5H018_HUMAN GTP-binding nuclear protein Ran (Fragment) O	4319500	127	0.0463861	124990000	173	0.0546719	3410600	165	0.026225	7	8	8	34.8	26.224	233	0	88.727	132720000	21			198
Q71U36;P0DPH8;P0DPH7;Q6PEY2;F8VQQ4	Tubulin alpha-1A chain	TUBA1A	sp|Q71U36|TBA1A_HUMAN Tubulin alpha-1A chain OS=Homo sapiens OX=9606 GN=TUBA1A PE=1 SV=1;sp|P0DPH8|TBA3D_HUMAN Tubulin alpha-3D chain OS=Homo sapiens OX=9606 GN=TUBA3D PE=1 SV=1;sp|P0DPH7|TBA3C_HUMAN Tubulin alpha-3C chain OS=Homo sapiens OX=9606 GN=TUBA3C	193390	458	0.00207677	122930000	174	0.0537708	2334800	200	0.0179529	5	39	1	84.9	50.135	451	0	90.834	125460000	15			1035
A0A1W2PPS1;Q00839;A0A1X7SBS1;A0A1W2PP35;Q5RI18;A0A1W2PQ74;A0A1W2PQL0;A0A1W2PP34;A0A1W2PPL4;A0A1W2PPH7;A0A1W2PRZ7;A0A1W2PQD4;A0A1W2PRI6;A0A1W2PNG3;A0A1W2PP22	Heterogeneous nuclear ribonucleoprotein U	HNRNPU	tr|A0A1W2PPS1|A0A1W2PPS1_HUMAN Heterogeneous nuclear ribonucleoprotein U OS=Homo sapiens OX=9606 GN=HNRNPU PE=1 SV=1;sp|Q00839|HNRPU_HUMAN Heterogeneous nuclear ribonucleoprotein U OS=Homo sapiens OX=9606 GN=HNRNPU PE=1 SV=6;tr|A0A1X7SBS1|A0A1X7SBS1_HUMAN	551100	316	0.00591814	122710000	175	0.0536746	2757900	190	0.0212062	15	10	10	21.6	88.317	804	0	253.66	126020000	32			94
CON__P00761			sp|P00761|TRYP_PIG Trypsin OS=Sus scrofa OX=9823 PE=1 SV=1	7830600	89	0.0840911	122440000	176	0.0535565	0	627	0	1	2	2	10	24.409	231	0	35.055	130270000	6		+	238
O00203;H0YBD0;F5GWU4;A0A590UJW5;A0A590UJ60;A0A5F9UJV3;A0A2R8Y2A8;A0A590UKC4;Q13367;F5GYB0;A0A590UJ44;A0A590UK69;A0A590UKD3;A0A590UJU0;A0A590UK04	AP-3 complex subunit beta-1	AP3B1	sp|O00203|AP3B1_HUMAN AP-3 complex subunit beta-1 OS=Homo sapiens OX=9606 GN=AP3B1 PE=1 SV=3	153280	499	0.00164604	122390000	177	0.0535346	110350	605	0.00084851	15	18	18	21.1	121.32	1094	0	138.74	122650000	24			479
P25205;J3KQ69;A0A499FHX9;Q7Z6P5	DNA replication licensing factor MCM3	MCM3	sp|P25205|MCM3_HUMAN DNA replication licensing factor MCM3 OS=Homo sapiens OX=9606 GN=MCM3 PE=1 SV=3;tr|J3KQ69|J3KQ69_HUMAN DNA helicase OS=Homo sapiens OX=9606 GN=MCM3 PE=1 SV=3;tr|A0A499FHX9|A0A499FHX9_HUMAN DNA helicase OS=Homo sapiens OX=9606 GN=MCM3 P	2253800	161	0.0242031	120340000	178	0.0526379	4590700	146	0.0352991	4	22	22	35	90.98	808	0	323.31	127180000	41			686
Q7KZ85	Transcription elongation factor SPT6	SUPT6H	sp|Q7KZ85|SPT6H_HUMAN Transcription elongation factor SPT6 OS=Homo sapiens OX=9606 GN=SUPT6H PE=1 SV=2	0	657	0	118140000	179	0.0516756	0	627	0	1	31	31	25.6	199.07	1726	0	323.31	118140000	53			1036
M0QXS5;A0A3B3ITJ4;P14866;M0QYT0;M0R1W6;M0R076;B4DVF8;M0QYL7	Heterogeneous nuclear ribonucleoprotein L	HNRNPL	tr|M0QXS5|M0QXS5_HUMAN Heterogeneous nuclear ribonucleoprotein L (Fragment) OS=Homo sapiens OX=9606 GN=HNRNPL PE=1 SV=1;tr|A0A3B3ITJ4|A0A3B3ITJ4_HUMAN Heterogeneous nuclear ribonucleoprotein L (Fragment) OS=Homo sapiens OX=9606 GN=HNRNPL PE=1 SV=1;sp|P1486	1107200	214	0.01189	116850000	180	0.0511114	2895800	187	0.0222666	8	11	11	45.3	58.362	530	0	163.49	120860000	37			127
Q06830;A0A0A0MSI0;A0A0A0MRQ5	Peroxiredoxin-1	PRDX1	sp|Q06830|PRDX1_HUMAN Peroxiredoxin-1 OS=Homo sapiens OX=9606 GN=PRDX1 PE=1 SV=1;tr|A0A0A0MSI0|A0A0A0MSI0_HUMAN Peroxiredoxin-1 (Fragment) OS=Homo sapiens OX=9606 GN=PRDX1 PE=1 SV=1	999840	228	0.0107371	115900000	181	0.0506958	1440800	252	0.0110787	3	10	8	57.8	22.11	199	0	76.755	118340000	22			911
A0A6Q8PHP0;P49902;A0A6Q8PHB5;Q5JUV4;Q5JUV6;A0A6Q8PFH2;A0A6Q8PG36;H0YHR8;A0A6Q8PF50;S4R3E7;A0A6Q8PEZ2;S4R3A6	Cytosolic purine 5-nucleotidase	NT5C2	tr|A0A6Q8PHP0|A0A6Q8PHP0_HUMAN Cytosolic purine 5-nucleotidase OS=Homo sapiens OX=9606 GN=NT5C2 PE=1 SV=1;sp|P49902|5NTC_HUMAN Cytosolic purine 5-nucleotidase OS=Homo sapiens OX=9606 GN=NT5C2 PE=1 SV=1;tr|A0A6Q8PHB5|A0A6Q8PHB5_HUMAN Cytosolic purine 5-n	0	657	0	115370000	182	0.050464	367610	443	0.00282665	12	16	16	42.4	65.866	569	0	130.93	115740000	26			162
Q32MZ4	Leucine-rich repeat flightless-interacting protein 1	LRRFIP1	sp|Q32MZ4|LRRF1_HUMAN Leucine-rich repeat flightless-interacting protein 1 OS=Homo sapiens OX=9606 GN=LRRFIP1 PE=1 SV=2	1953200	170	0.020975	114300000	183	0.049996	911340	307	0.00700753	1	13	13	28.8	89.252	808	0	164.89	117170000	24			995
P43686	26S protease regulatory subunit 6B	PSMC4	sp|P43686|PRS6B_HUMAN 26S proteasome regulatory subunit 6B OS=Homo sapiens OX=9606 GN=PSMC4 PE=1 SV=2	2456300	156	0.0263777	112920000	184	0.0493923	3359100	169	0.025829	1	18	18	56.5	47.366	418	0	225.6	118730000	59			761
P51665;H3BNT7;H3BTM8;H3BQV2	26S proteasome non-ATPase regulatory subunit 7	PSMD7	sp|P51665|PSMD7_HUMAN 26S proteasome non-ATPase regulatory subunit 7 OS=Homo sapiens OX=9606 GN=PSMD7 PE=1 SV=2;tr|H3BNT7|H3BNT7_HUMAN 26S proteasome non-ATPase regulatory subunit 7 OS=Homo sapiens OX=9606 GN=PSMD7 PE=1 SV=1;tr|H3BTM8|H3BTM8_HUMAN 26S prot	1098800	215	0.0117998	112730000	185	0.0493092	3814500	155	0.0293307	4	12	12	52.8	37.025	324	0	102.94	117640000	25			799
P49736;H0Y8E6;H7C4N9;C9J013;C9JZ21;F8WDM3	DNA replication licensing factor MCM2	MCM2	sp|P49736|MCM2_HUMAN DNA replication licensing factor MCM2 OS=Homo sapiens OX=9606 GN=MCM2 PE=1 SV=4;tr|H0Y8E6|H0Y8E6_HUMAN DNA replication licensing factor MCM2 (Fragment) OS=Homo sapiens OX=9606 GN=MCM2 PE=1 SV=1	2880000	148	0.0309277	112690000	186	0.0492917	2933300	184	0.0225549	6	19	19	30.1	101.89	904	0	257.36	118500000	38			789
Q15008;C9J7B7;C9J0E9;H7C531	26S proteasome non-ATPase regulatory subunit 6	PSMD6	sp|Q15008|PSMD6_HUMAN 26S proteasome non-ATPase regulatory subunit 6 OS=Homo sapiens OX=9606 GN=PSMD6 PE=1 SV=1	2044100	165	0.0219511	112670000	187	0.049283	2212200	207	0.0170102	4	21	21	54.2	45.531	389	0	220.17	116920000	37			965
Q9UNZ2;F2Z2K0;R4GNE6;G3V4V8;R4GMY2	NSFL1 cofactor p47	NSFL1C	sp|Q9UNZ2|NSF1C_HUMAN NSFL1 cofactor p47 OS=Homo sapiens OX=9606 GN=NSFL1C PE=1 SV=2;tr|F2Z2K0|F2Z2K0_HUMAN NSFL1 cofactor p47 OS=Homo sapiens OX=9606 GN=NSFL1C PE=1 SV=1	0	657	0	112240000	188	0.0490949	0	627	0	5	13	13	50.5	40.572	370	0	323.31	112240000	19			1221
Q9P287	BRCA2 and CDKN1A-interacting protein	BCCIP	sp|Q9P287|BCCIP_HUMAN BRCA2 and CDKN1A-interacting protein OS=Homo sapiens OX=9606 GN=BCCIP PE=1 SV=1	646340	284	0.0069409	111520000	189	0.04878	630520	370	0.00484823	1	8	8	36.9	35.979	314	0	116.09	112800000	20			1186
P35998;C9JLS9	26S protease regulatory subunit 7	PSMC2	sp|P35998|PRS7_HUMAN 26S proteasome regulatory subunit 7 OS=Homo sapiens OX=9606 GN=PSMC2 PE=1 SV=3	4935000	118	0.0529959	110630000	190	0.0483907	8067000	108	0.0620292	2	22	22	57.5	48.633	433	0	323.31	123630000	52			735
P62191;G3V4X1	26S protease regulatory subunit 4	PSMC1	sp|P62191|PRS4_HUMAN 26S proteasome regulatory subunit 4 OS=Homo sapiens OX=9606 GN=PSMC1 PE=1 SV=1	4913800	119	0.0527682	109610000	191	0.0479445	6398100	122	0.0491966	2	16	16	45.9	49.184	440	0	260.9	120920000	40			850
A0A6I8PL42;A0A6I8PIT3;A0A6I8PIV1;Q9P2J5;A0A6I8PLB8;B4DER1;A0A6I8PRS0;A0A6I8PLB3;A0A6I8PS05;A0A6I8PIP7;A0A6I8PTV8;A0A6I8PRU9;A0A6I8PRP1	Leucine--tRNA ligase, cytoplasmic	LARS	tr|A0A6I8PL42|A0A6I8PL42_HUMAN Leucyl-tRNA synthetase OS=Homo sapiens OX=9606 GN=LARS1 PE=1 SV=1;tr|A0A6I8PIT3|A0A6I8PIT3_HUMAN Leucyl-tRNA synthetase OS=Homo sapiens OX=9606 GN=LARS1 PE=1 SV=1;tr|A0A6I8PIV1|A0A6I8PIV1_HUMAN Leucyl-tRNA synthetase OS=Homo	555030	312	0.00596034	109210000	192	0.0477695	737630	346	0.00567183	13	23	23	28.7	129.21	1130	0	204.66	110510000	40			153
O14980;C9JKM9;C9JF49;C9IYM2;F8WF71;C9IZS4;C9JQ02;C9JV99;C9J673;H7BZC5	Exportin-1	XPO1	sp|O14980|XPO1_HUMAN Exportin-1 OS=Homo sapiens OX=9606 GN=XPO1 PE=1 SV=1	362600	352	0.00389388	108700000	193	0.0475465	89926	611	0.000691464	10	19	19	26.7	123.38	1071	0	251.61	109150000	32			501
P61163;R4GMT0;A0A1B0GVS3	Alpha-centractin	ACTR1A	sp|P61163|ACTZ_HUMAN Alpha-centractin OS=Homo sapiens OX=9606 GN=ACTR1A PE=1 SV=1;tr|R4GMT0|R4GMT0_HUMAN Alpha-centractin OS=Homo sapiens OX=9606 GN=ACTR1A PE=1 SV=1;tr|A0A1B0GVS3|A0A1B0GVS3_HUMAN Alpha-centractin OS=Homo sapiens OX=9606 GN=ACTR1A PE=1 SV=	2880500	147	0.030933	108280000	194	0.0473628	8403400	106	0.0646159	3	20	13	62.5	42.613	376	0	296.94	119560000	65			839
A0A6Q8PHL8;A0A6Q8PH45;A0A1B0GUA3;Q96EK5;A0A6Q8PGG2;A0A1B0GUH6;A0A0D9SFK7;A0A1B0GTE6;A0A1B0GW21;A0A1B0GTX3;A0A1B0GU96;A0A6Q8PHE6;A0A1B0GTE2;A0A1B0GVY9;A0A6Q8PH08	KIF1-binding protein	KIAA1279	tr|A0A6Q8PHL8|A0A6Q8PHL8_HUMAN KIF-binding protein OS=Homo sapiens OX=9606 GN=KIFBP PE=1 SV=1;tr|A0A6Q8PH45|A0A6Q8PH45_HUMAN KIF-binding protein OS=Homo sapiens OX=9606 GN=KIFBP PE=1 SV=1;tr|A0A1B0GUA3|A0A1B0GUA3_HUMAN KIF-binding protein OS=Homo sapiens O	253680	417	0.00272421	107330000	195	0.0469472	412860	420	0.00317459	15	12	12	37.2	67.908	588	0	198.29	107990000	25			88
Q15084	Protein disulfide-isomerase A6	PDIA6	sp|Q15084|PDIA6_HUMAN Protein disulfide-isomerase A6 OS=Homo sapiens OX=9606 GN=PDIA6 PE=1 SV=1	666030	281	0.00715235	106020000	196	0.0463742	850840	314	0.00654233	1	9	9	30.2	48.121	440	0	92.709	107540000	24			971
P51991	Heterogeneous nuclear ribonucleoprotein A3	HNRNPA3	sp|P51991|ROA3_HUMAN Heterogeneous nuclear ribonucleoprotein A3 OS=Homo sapiens OX=9606 GN=HNRNPA3 PE=1 SV=2	198110	448	0.00212746	105710000	197	0.0462386	1852400	222	0.0142436	1	10	10	30.4	39.594	378	0	152.92	107760000	18			802
P10909;E7ERK6;H0YLK8;E7ETB4;E5RG36;E5RGB0;E5RH61;E5RJZ5;H0YC35;H0YAS8	Clusterin;Clusterin beta chain;Clusterin alpha chain	CLU	sp|P10909|CLUS_HUMAN Clusterin OS=Homo sapiens OX=9606 GN=CLU PE=1 SV=1;tr|E7ERK6|E7ERK6_HUMAN Clusterin (Fragment) OS=Homo sapiens OX=9606 GN=CLU PE=1 SV=1;tr|H0YLK8|H0YLK8_HUMAN Clusterin (Fragment) OS=Homo sapiens OX=9606 GN=CLU PE=1 SV=1;tr|E7ETB4|E7ET	3511800	140	0.0377124	105550000	198	0.0461686	5373200	134	0.0413159	10	12	12	26.7	52.494	449	0	323.31	114430000	26			616
Q14204;A0A2R8Y706;A0A2R8YFZ7;A0A2R8Y5T0;A0A2R8Y6H2;A0A2R8Y542;A0A2R8YGC7;H0YJ21;A0A2R8Y6I5	Cytoplasmic dynein 1 heavy chain 1	DYNC1H1	sp|Q14204|DYHC1_HUMAN Cytoplasmic dynein 1 heavy chain 1 OS=Homo sapiens OX=9606 GN=DYNC1H1 PE=1 SV=5	6768400	95	0.0726843	104090000	199	0.04553	7849300	109	0.0603553	9	72	72	22.5	532.4	4646	0	323.31	118710000	126			956
P41252;A0A0A0MSX9;J3KR24;A0A0D9SFC1;Q5TCC9	Isoleucine--tRNA ligase, cytoplasmic	IARS	sp|P41252|SYIC_HUMAN Isoleucine--tRNA ligase, cytoplasmic OS=Homo sapiens OX=9606 GN=IARS1 PE=1 SV=2;tr|A0A0A0MSX9|A0A0A0MSX9_HUMAN Isoleucyl-tRNA synthetase OS=Homo sapiens OX=9606 GN=IARS1 PE=1 SV=1;tr|J3KR24|J3KR24_HUMAN Isoleucyl-tRNA synthetase OS=Hom	1292300	203	0.0138777	104050000	200	0.0455125	1389100	257	0.0106811	5	23	23	24.9	144.5	1262	0	323.31	106730000	39			755
P26640;A0A140T936;A0A140T954;A2ABF4;A0A0G2JJT9;A0A140T904;H0Y426	Valine--tRNA ligase	VARS	sp|P26640|SYVC_HUMAN Valine--tRNA ligase OS=Homo sapiens OX=9606 GN=VARS1 PE=1 SV=4;tr|A0A140T936|A0A140T936_HUMAN Valyl-tRNA synthetase (Fragment) OS=Homo sapiens OX=9606 GN=VARS1 PE=1 SV=1	716980	272	0.00769949	102400000	201	0.0447908	258060	514	0.00198429	7	19	19	26.2	140.47	1264	0	195.7	103380000	39			695
P38919;I3L3H2	Eukaryotic initiation factor 4A-III;Eukaryotic initiation factor 4A-III, N-terminally processed	EIF4A3	sp|P38919|IF4A3_HUMAN Eukaryotic initiation factor 4A-III OS=Homo sapiens OX=9606 GN=EIF4A3 PE=1 SV=4;tr|I3L3H2|I3L3H2_HUMAN RNA helicase OS=Homo sapiens OX=9606 GN=EIF4A3 PE=1 SV=2	1026300	223	0.0110212	102300000	202	0.044747	739500	345	0.00568621	2	16	13	41.1	46.871	411	0	155.72	104070000	23			745
P62241;Q5JR95	40S ribosomal protein S8	RPS8	sp|P62241|RS8_HUMAN 40S ribosomal protein S8 OS=Homo sapiens OX=9606 GN=RPS8 PE=1 SV=2;tr|Q5JR95|Q5JR95_HUMAN 40S ribosomal protein S8 OS=Homo sapiens OX=9606 GN=RPS8 PE=1 SV=1	7637900	91	0.0820217	100500000	203	0.0439597	7679100	112	0.0590466	2	16	16	55.8	24.205	208	0	197.84	115820000	36			852
P17858;F8WEU2	ATP-dependent 6-phosphofructokinase, liver type	PFKL	sp|P17858|PFKAL_HUMAN ATP-dependent 6-phosphofructokinase, liver type OS=Homo sapiens OX=9606 GN=PFKL PE=1 SV=6	699790	276	0.00751489	100220000	204	0.0438372	827800	322	0.00636517	2	15	13	28.5	85.018	780	0	148.51	101750000	25			653
Q16531;F5GY55;F5GYG8;F5GWI0;F5GZY8;F5H2L3;F5H198	DNA damage-binding protein 1	DDB1	sp|Q16531|DDB1_HUMAN DNA damage-binding protein 1 OS=Homo sapiens OX=9606 GN=DDB1 PE=1 SV=1;tr|F5GY55|F5GY55_HUMAN DNA damage-binding protein 1 OS=Homo sapiens OX=9606 GN=DDB1 PE=1 SV=1	2465300	155	0.0264743	98804000	205	0.0432179	1452500	251	0.0111686	7	25	25	29.9	126.97	1140	0	215.28	102720000	47			990
Q9UNM6;A0A087WUL9;J3KNQ3;E9PL38;H0YD73;E9PQG3;E9PPD2;F8W8J6	26S proteasome non-ATPase regulatory subunit 13	PSMD13	sp|Q9UNM6|PSD13_HUMAN 26S proteasome non-ATPase regulatory subunit 13 OS=Homo sapiens OX=9606 GN=PSMD13 PE=1 SV=2;tr|A0A087WUL9|A0A087WUL9_HUMAN 26S proteasome non-ATPase regulatory subunit 13 OS=Homo sapiens OX=9606 GN=PSMD13 PE=1 SV=1;tr|J3KNQ3|J3KNQ3_HU	4243100	130	0.0455657	98316000	206	0.0430044	3274200	174	0.0251762	8	22	22	67.6	42.945	376	0	323.31	105830000	48			1217
A0A087WWU8;D6R904;A0A494C0G0;H0YKX5;F5H7S3;H7BYY1;H0YKJ4;H0YK48;A0A494BZZ2;B7Z596;A0A0S2Z4G6;Q6ZN40;P09493;H0YL80;H0YKP3;Q5VU61;H0YL42;A0A494C0V8		TPM3	tr|A0A087WWU8|A0A087WWU8_HUMAN Tropomyosin alpha-3 chain OS=Homo sapiens OX=9606 GN=TPM3 PE=1 SV=1	19975000	53	0.214507	97566000	207	0.0426763	14623000	75	0.11244	18	27	7	67	26.42	227	0	323.31	132160000	40			28
P40227;Q92526;J3KRI6	T-complex protein 1 subunit zeta	CCT6A	sp|P40227|TCPZ_HUMAN T-complex protein 1 subunit zeta OS=Homo sapiens OX=9606 GN=CCT6A PE=1 SV=3	5715800	107	0.0613807	96153000	208	0.0420583	12943000	82	0.0995221	3	24	24	49	58.024	531	0	323.31	114810000	61			748
P12277;G3V4N7;H0YJG0;G3V461;H0YJK0	Creatine kinase B-type	CKB	sp|P12277|KCRB_HUMAN Creatine kinase B-type OS=Homo sapiens OX=9606 GN=CKB PE=1 SV=1;tr|G3V4N7|G3V4N7_HUMAN Creatine kinase (Fragment) OS=Homo sapiens OX=9606 GN=CKB PE=1 SV=1	328390	376	0.00352651	95434000	209	0.0417438	2026800	218	0.0155846	5	14	14	53.5	42.644	381	0	154.15	97789000	37			627
A0A3B3IU45;P33991;A0A3B3IT92;A0A3B3ITP6;A0A3B3IS57;E5RG31;A0A3B3IRR8	DNA replication licensing factor MCM4	MCM4	tr|A0A3B3IU45|A0A3B3IU45_HUMAN DNA helicase OS=Homo sapiens OX=9606 GN=MCM4 PE=1 SV=1;sp|P33991|MCM4_HUMAN DNA replication licensing factor MCM4 OS=Homo sapiens OX=9606 GN=MCM4 PE=1 SV=5;tr|A0A3B3IT92|A0A3B3IT92_HUMAN DNA helicase OS=Homo sapiens OX=9606 G	660000	283	0.00708759	94957000	210	0.0415351	772750	333	0.00594187	7	21	21	34.8	91.19	813	0	205.57	96390000	34			129
J3KT73;J3QL01;P63173;J3KSP2	60S ribosomal protein L38	RPL38	tr|J3KT73|J3KT73_HUMAN 60S ribosomal protein L38 OS=Homo sapiens OX=9606 GN=RPL38 PE=1 SV=1;tr|J3QL01|J3QL01_HUMAN 60S ribosomal protein L38 OS=Homo sapiens OX=9606 GN=RPL38 PE=1 SV=1;sp|P63173|RL38_HUMAN 60S ribosomal protein L38 OS=Homo sapiens OX=9606 G	63295	621	0.000679711	94295000	211	0.0412456	131140	590	0.00100837	4	4	4	39.1	7.5649	64	0	33.075	94489000	10			413
P28066	Proteasome subunit alpha type-5	PSMA5	sp|P28066|PSA5_HUMAN Proteasome subunit alpha type-5 OS=Homo sapiens OX=9606 GN=PSMA5 PE=1 SV=3	53554000	33	0.575104	93506000	212	0.0409005	46847000	38	0.360219	1	18	18	75.5	26.411	241	0	323.31	193910000	52			703
P19784;H3BSA1;H3BNI9;H3BV19	Casein kinase II subunit alpha	CSNK2A2	sp|P19784|CSK22_HUMAN Casein kinase II subunit alpha OS=Homo sapiens OX=9606 GN=CSNK2A2 PE=1 SV=1;tr|H3BSA1|H3BSA1_HUMAN Casein kinase II subunit alpha (Fragment) OS=Homo sapiens OX=9606 GN=CSNK2A2 PE=1 SV=2	195150	453	0.00209567	93191000	213	0.0407627	1523300	243	0.011713	4	14	14	51.4	41.213	350	0	265.73	94909000	28			662
P12814;H9KV75;G3V2N5;A0A494C1A0;G3V2W4;H0YJW3;H7C5W8;A0A494C033;H0YJ11;A0A494C166;G3V2X9;A0A494C0Q3;G3V5M4;G3V2E8;G3V380;A0A494C031	Alpha-actinin-1	ACTN1	sp|P12814|ACTN1_HUMAN Alpha-actinin-1 OS=Homo sapiens OX=9606 GN=ACTN1 PE=1 SV=2;tr|H9KV75|H9KV75_HUMAN Alpha-actinin-1 OS=Homo sapiens OX=9606 GN=ACTN1 PE=1 SV=1	20736000	51	0.222679	90902000	214	0.0397614	28939000	50	0.222519	16	62	33	69.7	103.06	892	0	323.31	140580000	98			629
Q15233;C9IZL7;C9JYS8;H7C367;C9J4X2	Non-POU domain-containing octamer-binding protein	NONO	sp|Q15233|NONO_HUMAN Non-POU domain-containing octamer-binding protein OS=Homo sapiens OX=9606 GN=NONO PE=1 SV=4	785320	261	0.00843337	89634000	215	0.0392068	831160	320	0.006391	5	12	12	34.2	54.231	471	0	192.78	91250000	25			973
P0DP25;P0DP24;P0DP23;E7EMB3;M0QZ52;Q96HY3;F8WBR5;G3V479;G3V361;A0A590UJI2;A0A590UJC0;G3V226;P27482		CALM2;CALM3	sp|P0DP25|CALM3_HUMAN Calmodulin-3 OS=Homo sapiens OX=9606 GN=CALM3 PE=1 SV=1;sp|P0DP24|CALM2_HUMAN Calmodulin-2 OS=Homo sapiens OX=9606 GN=CALM2 PE=1 SV=1;sp|P0DP23|CALM1_HUMAN Calmodulin-1 OS=Homo sapiens OX=9606 GN=CALM1 PE=1 SV=1;tr|E7EMB3|E7EMB3_HUMAN	0	657	0	88431000	216	0.0386806	555380	384	0.00427046	13	9	9	55.7	16.837	149	0	121.35	88986000	15			610
Q13045;J3KS54;J3QQQ2;K7EQZ7;K7EP37;J3QQU5;K7EP27;J3QLR6	Protein flightless-1 homolog	FLII	sp|Q13045|FLII_HUMAN Protein flightless-1 homolog OS=Homo sapiens OX=9606 GN=FLII PE=1 SV=2	1147000	211	0.0123174	88261000	217	0.0386062	2049600	216	0.0157599	8	23	23	27	144.75	1269	0	323.31	91458000	53			930
Q14566	DNA replication licensing factor MCM6	MCM6	sp|Q14566|MCM6_HUMAN DNA replication licensing factor MCM6 OS=Homo sapiens OX=9606 GN=MCM6 PE=1 SV=1	1436100	190	0.015422	87178000	218	0.0381325	672660	364	0.00517226	1	17	17	30	92.888	821	0	323.31	89287000	35			959
P42704;B8ZZ38;A0A0C4DG06;C9JCA9;H7C3W8	Leucine-rich PPR motif-containing protein, mitochondrial	LRPPRC	sp|P42704|LPPRC_HUMAN Leucine-rich PPR motif-containing protein, mitochondrial OS=Homo sapiens OX=9606 GN=LRPPRC PE=1 SV=3	735760	267	0.00790116	86320000	219	0.0377572	1509000	244	0.0116031	5	29	29	26.6	157.9	1394	0	284.73	88565000	52			759
Q9H446;E5RGQ3;E5RGS5;E5RJE3	RWD domain-containing protein 1	RWDD1	sp|Q9H446|RWDD1_HUMAN RWD domain-containing protein 1 OS=Homo sapiens OX=9606 GN=RWDD1 PE=1 SV=1;tr|E5RGQ3|E5RGQ3_HUMAN RWD domain-containing protein 1 (Fragment) OS=Homo sapiens OX=9606 GN=RWDD1 PE=1 SV=1	0	657	0	86130000	220	0.0376741	0	627	0	4	6	6	26.3	27.939	243	0	45.498	86130000	13			1154
A0A669KBL1;Q93009;H3BND8;F5H2X1;I3L2D8;H3BUV0;H3BTM1;H3BRA2;H3BQD1	Ubiquitin carboxyl-terminal hydrolase 7;Ubiquitin carboxyl-terminal hydrolase	USP7	tr|A0A669KBL1|A0A669KBL1_HUMAN Ubiquitin carboxyl-terminal hydrolase 7 OS=Homo sapiens OX=9606 GN=USP7 PE=1 SV=1;sp|Q93009|UBP7_HUMAN Ubiquitin carboxyl-terminal hydrolase 7 OS=Homo sapiens OX=9606 GN=USP7 PE=1 SV=2;tr|H3BND8|H3BND8_HUMAN Ubiquitin carboxy	635710	287	0.00682675	85593000	221	0.0374392	672430	366	0.00517049	9	18	18	23.2	132.33	1137	0	157.58	86901000	34			152
C9JJ34;P43487;F6WQW2;C9JXG8;C9JGV6;C9JDM3;C9JIC6	Ran-specific GTPase-activating protein	RANBP1	tr|C9JJ34|C9JJ34_HUMAN Ran-specific GTPase-activating protein (Fragment) OS=Homo sapiens OX=9606 GN=RANBP1 PE=1 SV=1;sp|P43487|RANG_HUMAN Ran-specific GTPase-activating protein OS=Homo sapiens OX=9606 GN=RANBP1 PE=1 SV=1;tr|F6WQW2|F6WQW2_HUMAN Ran-specific	812450	258	0.00872472	85533000	222	0.037413	2043500	217	0.015713	7	6	6	62.6	18.762	163	0	61.35	88389000	15			228
O43242;F5H8K4;H0YGV8	26S proteasome non-ATPase regulatory subunit 3	PSMD3	sp|O43242|PSMD3_HUMAN 26S proteasome non-ATPase regulatory subunit 3 OS=Homo sapiens OX=9606 GN=PSMD3 PE=1 SV=2	6222000	99	0.0668167	85399000	223	0.0373544	6970500	118	0.053598	3	28	28	56.4	60.977	534	0	323.31	98591000	65			511
C9J2Y9;P30876;C9J4M6;C9JMN3;C9JZW8	DNA-directed RNA polymerase;DNA-directed RNA polymerase II subunit RPB2	POLR2B	tr|C9J2Y9|C9J2Y9_HUMAN DNA-directed RNA polymerase subunit beta OS=Homo sapiens OX=9606 GN=POLR2B PE=1 SV=2;sp|P30876|RPB2_HUMAN DNA-directed RNA polymerase II subunit RPB2 OS=Homo sapiens OX=9606 GN=POLR2B PE=1 SV=1;tr|C9J4M6|C9J4M6_HUMAN DNA-directed RNA	251460	418	0.00270037	85060000	224	0.0372061	627530	371	0.00482524	5	23	23	28.3	133.06	1167	0	207.42	85939000	41			215
A0A087X2I1;P62333;H0YJC0;H0YJS8;H0YJX2;H0YJE9;H0YJT1	26S protease regulatory subunit 10B	PSMC6	tr|A0A087X2I1|A0A087X2I1_HUMAN 26S proteasome regulatory subunit 10B OS=Homo sapiens OX=9606 GN=PSMC6 PE=1 SV=1;sp|P62333|PRS10_HUMAN 26S proteasome regulatory subunit 10B OS=Homo sapiens OX=9606 GN=PSMC6 PE=1 SV=1;tr|H0YJC0|H0YJC0_HUMAN 26S proteasome reg	6080900	101	0.0653014	84244000	225	0.0368492	7298600	115	0.0561208	7	18	18	53.3	45.796	403	0	154.99	97624000	47			48
F8VZJ2;H0YHX9;Q13765;E9PAV3;F8W1N5;F8VNW4;F8W0W4;F8VZ58;Q9BZK3	Nascent polypeptide-associated complex subunit alpha;Nascent polypeptide-associated complex subunit alpha, muscle-specific form	NACA	tr|F8VZJ2|F8VZJ2_HUMAN Nascent polypeptide-associated complex subunit alpha OS=Homo sapiens OX=9606 GN=NACA PE=1 SV=1;tr|H0YHX9|H0YHX9_HUMAN Nascent polypeptide-associated complex subunit alpha OS=Homo sapiens OX=9606 GN=NACA PE=1 SV=2;sp|Q13765|NACA_HUMAN	165540	485	0.0017777	84211000	226	0.0368347	797290	327	0.00613057	9	5	5	45.6	15.016	136	0	93.548	85173000	10			282
Q9Y5B9;G3V5A4;G3V401;G3V2X0	FACT complex subunit SPT16	SUPT16H	sp|Q9Y5B9|SP16H_HUMAN FACT complex subunit SPT16 OS=Homo sapiens OX=9606 GN=SUPT16H PE=1 SV=1	0	657	0	83091000	227	0.0363448	0	627	0	4	16	16	21.5	119.91	1047	0	197.96	83091000	21			1242
P35268;K7EJT5;K7EP65;K7EKS7;K7ELC4;K7EMH1;K7ERI7	60S ribosomal protein L22	RPL22	sp|P35268|RL22_HUMAN 60S ribosomal protein L22 OS=Homo sapiens OX=9606 GN=RPL22 PE=1 SV=2;tr|K7EJT5|K7EJT5_HUMAN 60S ribosomal protein L22 (Fragment) OS=Homo sapiens OX=9606 GN=RPL22 PE=1 SV=1;tr|K7EP65|K7EP65_HUMAN 60S ribosomal protein L22 (Fragment) OS=	0	657	0	82748000	228	0.0361948	0	627	0	7	3	3	39.1	14.787	128	0	22.15	82748000	5			731
R4GNH3;E9PN50		PSMC3	tr|R4GNH3|R4GNH3_HUMAN 26S proteasome regulatory subunit 6A OS=Homo sapiens OX=9606 GN=PSMC3 PE=1 SV=1	5271600	112	0.0566105	82744000	229	0.036193	6849200	119	0.0526653	2	20	1	58.2	47.352	423	0	237.71	94864000	49			1247
A0A0R4J2E8;A8MXP9;P43243;D6REM6;D6R991;H0Y8T4;B3KM87;D6RBI2;D6RBK5;D6RE02;D6RIA2;D6RAM9;D6RAY2	Matrin-3	MATR3	tr|A0A0R4J2E8|A0A0R4J2E8_HUMAN Matrin-3 OS=Homo sapiens OX=9606 GN=MATR3 PE=1 SV=1;tr|A8MXP9|A8MXP9_HUMAN Matrin-3 OS=Homo sapiens OX=9606 GN=MATR3 PE=1 SV=1;sp|P43243|MATR3_HUMAN Matrin-3 OS=Homo sapiens OX=9606 GN=MATR3 PE=1 SV=2;tr|D6REM6|D6REM6_HUMAN M	1465200	188	0.0157345	81186000	230	0.0355116	3406200	166	0.0261911	13	14	14	23.6	94.622	847	0	198.86	86058000	40			82
P14174	Macrophage migration inhibitory factor	MIF	sp|P14174|MIF_HUMAN Macrophage migration inhibitory factor OS=Homo sapiens OX=9606 GN=MIF PE=1 SV=4	3176700	145	0.0341139	81180000	231	0.0355089	5461400	130	0.0419941	1	3	3	40	12.476	115	0	31.926	89819000	12			640
P32969;A0A2R8Y5Y7;D6RAN4;H0Y9V9;H0Y9R4	60S ribosomal protein L9	RPL9	sp|P32969|RL9_HUMAN 60S ribosomal protein L9 OS=Homo sapiens OX=9606 GN=RPL9 PE=1 SV=1;tr|A0A2R8Y5Y7|A0A2R8Y5Y7_HUMAN 60S ribosomal protein L9 OS=Homo sapiens OX=9606 GN=RPL9 PE=1 SV=1;tr|D6RAN4|D6RAN4_HUMAN 60S ribosomal protein L9 (Fragment) OS=Homo sapi	630930	288	0.00677542	80420000	232	0.0351765	1069800	290	0.00822597	5	9	9	69.3	21.863	192	0	63.624	82121000	21			724
P62979;J3QS39;J3QTR3;F5H6Q2;F5GYU3;F5H2Z3;F5H265;B4DV12;F5H388;F5H747;F5GXK7;J3QKN0;Q5PY61;Q96C32;P62987;P0CG47;P0CG48;A0A2R8Y422;M0R1M6;M0R2S1;M0R1V7;F5GZ39;J3QSA3	Ubiquitin-40S ribosomal protein S27a;Ubiquitin;40S ribosomal protein S27a;Ubiquitin-60S ribosomal protein L40;Ubiquitin;60S ribosomal protein L40;Polyubiquitin-B;Ubiquitin;Polyubiquitin-C;Ubiquitin	RPS27A;UBB;UBC;UBA52	sp|P62979|RS27A_HUMAN Ubiquitin-40S ribosomal protein S27a OS=Homo sapiens OX=9606 GN=RPS27A PE=1 SV=2;tr|J3QS39|J3QS39_HUMAN Polyubiquitin-B (Fragment) OS=Homo sapiens OX=9606 GN=UBB PE=1 SV=1;tr|J3QTR3|J3QTR3_HUMAN Ubiquitin-40S ribosomal protein S27a (F	4257400	129	0.0457193	80403000	233	0.0351691	8892400	102	0.068376	23	9	9	46.8	17.965	156	0	303.81	93553000	17			872
O00232;J3KTJ5;J3KSK1	26S proteasome non-ATPase regulatory subunit 12	PSMD12	sp|O00232|PSD12_HUMAN 26S proteasome non-ATPase regulatory subunit 12 OS=Homo sapiens OX=9606 GN=PSMD12 PE=1 SV=3	1767900	180	0.0189851	76440000	234	0.0334356	2988800	180	0.0229817	3	17	17	45.6	52.904	456	0	233.32	81197000	34			481
H3BNC9;P08708;H0YN88;A0A075B716;H0YN73	40S ribosomal protein S17	RPS17	tr|H3BNC9|H3BNC9_HUMAN 40S ribosomal protein S17 OS=Homo sapiens OX=9606 PE=3 SV=2;sp|P08708|RS17_HUMAN 40S ribosomal protein S17 OS=Homo sapiens OX=9606 GN=RPS17 PE=1 SV=2;tr|H0YN88|H0YN88_HUMAN 40S ribosomal protein S17 OS=Homo sapiens OX=9606 GN=RPS17 P	571020	309	0.00613206	76388000	235	0.0334129	949770	300	0.00730303	5	8	8	12.5	64.532	584	0	56.208	77909000	19			386
O60271;D6RHI8	C-Jun-amino-terminal kinase-interacting protein 4	SPAG9	sp|O60271|JIP4_HUMAN C-Jun-amino-terminal kinase-interacting protein 4 OS=Homo sapiens OX=9606 GN=SPAG9 PE=1 SV=4	9804000	78	0.105283	76284000	236	0.0333674	9859800	96	0.0758145	2	33	2	36	146.2	1321	0	323.31	95948000	86			526
H7BXH2;E9PKF6;Q5H9R7;E9PQP7;H0YEN2;E9PK08;E9PNN8;E9PKG4;H0YDW1;E9PJD8	Serine/threonine-protein phosphatase 6 regulatory subunit 3	PPP6R3	tr|H7BXH2|H7BXH2_HUMAN Serine/threonine-protein phosphatase 6 regulatory subunit 3 OS=Homo sapiens OX=9606 GN=PPP6R3 PE=1 SV=1;tr|E9PKF6|E9PKF6_HUMAN Serine/threonine-protein phosphatase 6 regulatory subunit 3 OS=Homo sapiens OX=9606 GN=PPP6R3 PE=1 SV=1;sp	74299	603	0.00079788	76023000	237	0.0332532	227260	533	0.00174746	10	15	15	27	92.407	827	0	183.51	76325000	19			299
Q99460;A0A087WW66;H7C378;C9J9M4;H7BZR6;F8WCE3	26S proteasome non-ATPase regulatory subunit 1	PSMD1	sp|Q99460|PSMD1_HUMAN 26S proteasome non-ATPase regulatory subunit 1 OS=Homo sapiens OX=9606 GN=PSMD1 PE=1 SV=2;tr|A0A087WW66|A0A087WW66_HUMAN 26S proteasome non-ATPase regulatory subunit 1 OS=Homo sapiens OX=9606 GN=PSMD1 PE=1 SV=1	4324300	125	0.0464377	75575000	238	0.0330573	7577300	113	0.0582638	6	32	32	51.1	105.84	953	0	323.31	87476000	71			1118
O75533;H7C341	Splicing factor 3B subunit 1	SF3B1	sp|O75533|SF3B1_HUMAN Splicing factor 3B subunit 1 OS=Homo sapiens OX=9606 GN=SF3B1 PE=1 SV=3	766010	264	0.00822601	75134000	239	0.0328644	1111000	286	0.00854276	2	21	21	25.2	145.83	1304	0	169.62	77011000	34			546
P62249;M0R210;M0R3H0;M0R1M5;Q6IPX4;M0QX76	40S ribosomal protein S16	RPS16	sp|P62249|RS16_HUMAN 40S ribosomal protein S16 OS=Homo sapiens OX=9606 GN=RPS16 PE=1 SV=2;tr|M0R210|M0R210_HUMAN 40S ribosomal protein S16 OS=Homo sapiens OX=9606 GN=RPS16 PE=1 SV=1;tr|M0R3H0|M0R3H0_HUMAN 40S ribosomal protein S16 OS=Homo sapiens OX=9606 G	3886200	136	0.041733	74738000	240	0.0326911	1798600	224	0.0138299	6	10	10	51.4	16.445	146	0	72.564	80423000	18			854
P13674	Prolyl 4-hydroxylase subunit alpha-1	P4HA1	sp|P13674|P4HA1_HUMAN Prolyl 4-hydroxylase subunit alpha-1 OS=Homo sapiens OX=9606 GN=P4HA1 PE=1 SV=2	1313900	201	0.0141097	74417000	241	0.0325507	1208800	272	0.00929477	1	17	17	43.1	61.049	534	0	179.64	76940000	35			635
C9JD32;B9ZVP7;J3KT29;P62829	60S ribosomal protein L23	RPL23	tr|C9JD32|C9JD32_HUMAN 60S ribosomal protein L23 (Fragment) OS=Homo sapiens OX=9606 GN=RPL23 PE=1 SV=1;tr|B9ZVP7|B9ZVP7_HUMAN 60S ribosomal protein L23 OS=Homo sapiens OX=9606 GN=RPL23 PE=1 SV=1;tr|J3KT29|J3KT29_HUMAN 60S ribosomal protein L23 OS=Homo sapi	584380	304	0.00627553	74163000	242	0.0324396	752070	338	0.00578286	4	4	4	51.6	9.6694	91	0	25.03	75499000	13			212
P17655;C9JWY7	Calpain-2 catalytic subunit	CAPN2	sp|P17655|CAN2_HUMAN Calpain-2 catalytic subunit OS=Homo sapiens OX=9606 GN=CAPN2 PE=1 SV=6	722590	270	0.00775973	73698000	243	0.0322362	1323900	263	0.0101798	2	16	16	39.9	79.994	700	0	175.5	75744000	38			652
CON__P35527;P35527;K7EQQ3	Keratin, type I cytoskeletal 9	KRT9	;sp|P35527|K1C9_HUMAN Keratin, type I cytoskeletal 9 OS=Homo sapiens OX=9606 GN=KRT9 PE=1 SV=3;tr|K7EQQ3|K7EQQ3_HUMAN Keratin, type I cytoskeletal 9 OS=Homo sapiens OX=9606 GN=KRT9 PE=1 SV=1	2656000	151	0.0285222	73584000	244	0.0321864	5768000	127	0.0443516	3	16	16	44	62.129	623	0	196.85	82008000	46		+	241
Q9BT78;D6RFN0;D6RAX7;D6RD63	COP9 signalosome complex subunit 4	COPS4	sp|Q9BT78|CSN4_HUMAN COP9 signalosome complex subunit 4 OS=Homo sapiens OX=9606 GN=COPS4 PE=1 SV=1;tr|D6RFN0|D6RFN0_HUMAN COP9 signalosome complex subunit 4 OS=Homo sapiens OX=9606 GN=COPS4 PE=1 SV=1;tr|D6RAX7|D6RAX7_HUMAN COP9 signalosome complex subunit	2497900	154	0.0268244	72869000	245	0.0318736	5467800	129	0.0420433	4	19	19	62.8	46.268	406	0	244.93	80835000	46			1131
A0A2R8YF78;A0A0D9SFB3;A0A0D9SG12;A0A2R8YFS5;A0A2R8Y4A4;A0A0D9SF53;O00571;A0A2R8Y5G6;A0A2R8YCW1;A0A2R8YFR4;A0A2U3TZJ9;A0A2R8Y645;A0A2R8YDT5;A0A2R8Y7T2;F6S8Q4;A0A2R8YDH3;O15523;A0A0J9YVQ7;A0A087WVZ1;A0A2R8YCU0;A0A2R8Y650;C9J8G5;C9J081;A0A2R8Y770;A0A2R8Y4D2;A0A087WX09	ATP-dependent RNA helicase DDX3X;ATP-dependent RNA helicase DDX3Y	DDX3X;DDX3Y	tr|A0A2R8YF78|A0A2R8YF78_HUMAN RNA helicase OS=Homo sapiens OX=9606 GN=DDX3X PE=1 SV=1;tr|A0A0D9SFB3|A0A0D9SFB3_HUMAN RNA helicase OS=Homo sapiens OX=9606 GN=DDX3X PE=1 SV=1;tr|A0A0D9SG12|A0A0D9SG12_HUMAN RNA helicase OS=Homo sapiens OX=9606 GN=DDX3X PE=1	381800	346	0.00410006	72579000	246	0.0317468	457640	410	0.00351891	26	16	15	34.9	70.939	641	0	296.95	73419000	23			121
P54105;E9PMI6;J3KN38;E9PJF4	Methylosome subunit pICln	CLNS1A	sp|P54105|ICLN_HUMAN Methylosome subunit pICln OS=Homo sapiens OX=9606 GN=CLNS1A PE=1 SV=1;tr|E9PMI6|E9PMI6_HUMAN Chloride channel, nucleotide sensitive 1A OS=Homo sapiens OX=9606 GN=CLNS1A PE=1 SV=1;tr|J3KN38|J3KN38_HUMAN Chloride channel, nucleotide sens	0	657	0	72578000	247	0.0317463	2224400	205	0.017104	4	6	6	56.1	26.215	237	0	164.03	74802000	16			817
Q13283;E5RIZ6;E5RI46;E5RIF8;E5RH42;E5RJU8	Ras GTPase-activating protein-binding protein 1	G3BP1	sp|Q13283|G3BP1_HUMAN Ras GTPase-activating protein-binding protein 1 OS=Homo sapiens OX=9606 GN=G3BP1 PE=1 SV=1;tr|E5RIZ6|E5RIZ6_HUMAN Ras GTPase-activating protein-binding protein 1 (Fragment) OS=Homo sapiens OX=9606 GN=G3BP1 PE=1 SV=1	0	657	0	71932000	248	0.0314638	0	627	0	6	8	7	27.9	52.164	466	0	92.156	71932000	13			939
O14818;H0Y586;Q8TAA3;A0A087WYS6;F5GY34	Proteasome subunit alpha type-7	PSMA7	sp|O14818|PSA7_HUMAN Proteasome subunit alpha type-7 OS=Homo sapiens OX=9606 GN=PSMA7 PE=1 SV=1;tr|H0Y586|H0Y586_HUMAN Proteasome subunit alpha type-7 (Fragment) OS=Homo sapiens OX=9606 GN=PSMA7 PE=1 SV=1	53243000	34	0.571765	71696000	249	0.0313605	58387000	34	0.448953	5	22	22	75.4	27.887	248	0	323.31	183330000	75			496
P16152;E9PQ63;A8MTM1	Carbonyl reductase [NADPH] 1	CBR1	sp|P16152|CBR1_HUMAN Carbonyl reductase [NADPH] 1 OS=Homo sapiens OX=9606 GN=CBR1 PE=1 SV=3;tr|E9PQ63|E9PQ63_HUMAN Carbonyl reductase [NADPH] 1 OS=Homo sapiens OX=9606 GN=CBR1 PE=1 SV=1;tr|A8MTM1|A8MTM1_HUMAN Carbonyl reductase [NADPH] 1 OS=Homo sapiens OX	1620100	185	0.0173979	71230000	250	0.0311567	2915400	185	0.0224173	3	10	8	56.3	30.375	277	0	180.28	75766000	30			650
E7EV71;Q14766;C9JD84;H7C0I7;H7BZ76	Latent-transforming growth factor beta-binding protein 1	LTBP1	tr|E7EV71|E7EV71_HUMAN Latent-transforming growth factor beta-binding protein 1 OS=Homo sapiens OX=9606 GN=LTBP1 PE=1 SV=2;sp|Q14766|LTBP1_HUMAN Latent-transforming growth factor beta-binding protein 1 OS=Homo sapiens OX=9606 GN=LTBP1 PE=1 SV=4;tr|C9JD84|C	0	657	0	70834000	251	0.0309835	0	627	0	5	13	13	16.3	148.43	1353	0	235.58	70834000	21			278
Q9Y678;H0Y8X7	Coatomer subunit gamma-1	COPG1	sp|Q9Y678|COPG1_HUMAN Coatomer subunit gamma-1 OS=Homo sapiens OX=9606 GN=COPG1 PE=1 SV=1	188740	460	0.00202684	70209000	252	0.0307101	375330	439	0.00288601	2	15	11	25.5	97.717	874	0	164.14	70773000	30			1244
Q9BWJ5	Splicing factor 3B subunit 5	SF3B5	sp|Q9BWJ5|SF3B5_HUMAN Splicing factor 3B subunit 5 OS=Homo sapiens OX=9606 GN=SF3B5 PE=1 SV=1	64231	619	0.000689762	69981000	253	0.0306104	478370	403	0.00367831	1	5	5	83.7	10.135	86	0	81.514	70524000	11			1139
Q9NZI8	Insulin-like growth factor 2 mRNA-binding protein 1	IGF2BP1	sp|Q9NZI8|IF2B1_HUMAN Insulin-like growth factor 2 mRNA-binding protein 1 OS=Homo sapiens OX=9606 GN=IGF2BP1 PE=1 SV=2	233730	426	0.00250997	69724000	254	0.030498	1714900	230	0.0131863	1	11	10	30	63.48	577	0	126.23	71673000	26			1183
O60502;H7C3X0	Protein O-GlcNAcase	MGEA5	sp|O60502|OGA_HUMAN Protein O-GlcNAcase OS=Homo sapiens OX=9606 GN=OGA PE=1 SV=2	6489200	97	0.0696861	65271000	255	0.0285502	9930600	95	0.0763589	2	30	30	46.5	102.91	916	0	250.68	81691000	59			530
P54886	Delta-1-pyrroline-5-carboxylate synthase;Glutamate 5-kinase;Gamma-glutamyl phosphate reductase	ALDH18A1	sp|P54886|P5CS_HUMAN Delta-1-pyrroline-5-carboxylate synthase OS=Homo sapiens OX=9606 GN=ALDH18A1 PE=1 SV=2	553770	314	0.00594681	65231000	256	0.0285327	561550	382	0.0043179	1	12	12	22.3	87.301	795	0	127.21	66347000	24			820
P33992;B1AHB1;B1AHB2;B1AHA9	DNA replication licensing factor MCM5;DNA helicase	MCM5	sp|P33992|MCM5_HUMAN DNA replication licensing factor MCM5 OS=Homo sapiens OX=9606 GN=MCM5 PE=1 SV=5;tr|B1AHB1|B1AHB1_HUMAN DNA helicase OS=Homo sapiens OX=9606 GN=MCM5 PE=1 SV=1	699870	275	0.00751575	64501000	257	0.0282134	585700	378	0.0045036	4	15	15	29	82.285	734	0	113.86	65786000	27			726
B1ALA9;A0A2R8Y7H4;P60891;A0A6Q8PEU0;A0A6Q8PG82;A0A6Q8PHK9;B1ALA7;A0A6Q8PHI4	Ribose-phosphate pyrophosphokinase 1	PRPS1	tr|B1ALA9|B1ALA9_HUMAN Ribose-phosphate pyrophosphokinase 1 OS=Homo sapiens OX=9606 GN=PRPS1 PE=1 SV=2;tr|A0A2R8Y7H4|A0A2R8Y7H4_HUMAN Ribose-phosphate diphosphokinase OS=Homo sapiens OX=9606 GN=PRPS1 PE=1 SV=1;sp|P60891|PRPS1_HUMAN Ribose-phosphate pyropho	0	657	0	62942000	258	0.0275315	252410	518	0.00194085	8	5	2	26.3	31.392	285	0	69.435	63194000	9			112
J3KTA4;P17844;J3QSF1;J3KRZ1;J3QRQ7;J3KRX8;J3KTQ4;J3QLG9;J3QR62;J3QRN5;X6RLV5;J3QR02	Probable ATP-dependent RNA helicase DDX5	DDX5	tr|J3KTA4|J3KTA4_HUMAN DEAD box protein 5 OS=Homo sapiens OX=9606 GN=DDX5 PE=1 SV=1;sp|P17844|DDX5_HUMAN Probable ATP-dependent RNA helicase DDX5 OS=Homo sapiens OX=9606 GN=DDX5 PE=1 SV=1	884170	247	0.0094949	62865000	259	0.0274978	1748800	228	0.013447	12	15	11	30.1	69.086	614	0	170.87	65498000	26			414
Q14166;V9GY16	Tubulin--tyrosine ligase-like protein 12	TTLL12	sp|Q14166|TTL12_HUMAN Tubulin--tyrosine ligase-like protein 12 OS=Homo sapiens OX=9606 GN=TTLL12 PE=1 SV=2	359830	356	0.00386413	61921000	260	0.0270849	216140	538	0.00166196	2	11	11	31.7	74.403	644	0	88.345	62497000	13			955
H0YA96;H0Y8G5;Q14103;D6RAF8;D6RF44;D6RBQ9;D6RD83	Heterogeneous nuclear ribonucleoprotein D0	HNRNPD	tr|H0YA96|H0YA96_HUMAN Heterogeneous nuclear ribonucleoprotein D0 (Fragment) OS=Homo sapiens OX=9606 GN=HNRNPD PE=1 SV=1;tr|H0Y8G5|H0Y8G5_HUMAN Heterogeneous nuclear ribonucleoprotein D0 (Fragment) OS=Homo sapiens OX=9606 GN=HNRNPD PE=1 SV=8;sp|Q14103|HNRP	348870	360	0.00374644	61601000	261	0.0269449	1007500	295	0.00774693	7	8	7	34.8	23.811	210	0	64.517	62958000	12			365
Q7KZF4;H7C597	Staphylococcal nuclease domain-containing protein 1	SND1	sp|Q7KZF4|SND1_HUMAN Staphylococcal nuclease domain-containing protein 1 OS=Homo sapiens OX=9606 GN=SND1 PE=1 SV=1	165910	484	0.00178167	61356000	262	0.0268377	767140	335	0.00589874	2	18	18	31.9	102	910	0	227.78	62289000	31			1037
P67870;Q5SRQ3;Q5SRQ6;N0E472;A0A0G2JM12;N0E644;A0A0G2JM58	Casein kinase II subunit beta	CSNK2B;CSNK2B-LY6G5B-1181;CSNK2B-LY6G5B--991	sp|P67870|CSK2B_HUMAN Casein kinase II subunit beta OS=Homo sapiens OX=9606 GN=CSNK2B PE=1 SV=1;tr|Q5SRQ3|Q5SRQ3_HUMAN Casein kinase II subunit beta OS=Homo sapiens OX=9606 GN=CSNK2B PE=1 SV=1;tr|Q5SRQ6|Q5SRQ6_HUMAN Casein kinase II subunit beta OS=Homo sa	0	657	0	60708000	263	0.0265543	402340	424	0.0030937	7	6	6	42.3	24.942	215	0	77.982	61110000	12			883
Q9Y3F4;H0YH33	Serine-threonine kinase receptor-associated protein	STRAP	sp|Q9Y3F4|STRAP_HUMAN Serine-threonine kinase receptor-associated protein OS=Homo sapiens OX=9606 GN=STRAP PE=1 SV=1	776760	263	0.00834145	60693000	264	0.0265477	1165400	277	0.00896106	2	12	12	50.9	38.438	350	0	168.26	62635000	21			1232
P46783;A0A2R8Y6L3;F6U211;A0A2R8Y7H1;A0A2R8YFH6;A0A1W2PQS6;S4R435;Q9NQ39	40S ribosomal protein S10	RPS10	sp|P46783|RS10_HUMAN 40S ribosomal protein S10 OS=Homo sapiens OX=9606 GN=RPS10 PE=1 SV=1;tr|A0A2R8Y6L3|A0A2R8Y6L3_HUMAN RPS10-NUDT3 readthrough (Fragment) OS=Homo sapiens OX=9606 GN=RPS10-NUDT3 PE=3 SV=1;tr|F6U211|F6U211_HUMAN 40S ribosomal protein S10 OS	100230	563	0.00107635	60254000	265	0.0263557	278070	495	0.00213815	8	6	6	38.2	18.898	165	0	54.554	60633000	15			770
Q13547;Q5TEE2;E5RK19	Histone deacetylase 1	HDAC1	sp|Q13547|HDAC1_HUMAN Histone deacetylase 1 OS=Homo sapiens OX=9606 GN=HDAC1 PE=1 SV=1;tr|Q5TEE2|Q5TEE2_HUMAN Histone deacetylase (Fragment) OS=Homo sapiens OX=9606 GN=HDAC1 PE=1 SV=1	923560	237	0.0099179	60158000	266	0.0263137	743890	343	0.00571996	3	8	5	29.7	55.102	482	0	130.44	61825000	20			944
A0A499FI31;Q15020;F8VVK9;F8VZM2;A0A494C0L2;F8W667	Squamous cell carcinoma antigen recognized by T-cells 3	SART3	tr|A0A499FI31|A0A499FI31_HUMAN Squamous cell carcinoma antigen recognized by T-cells 3 OS=Homo sapiens OX=9606 GN=SART3 PE=1 SV=1;sp|Q15020|SART3_HUMAN Squamous cell carcinoma antigen recognized by T-cells 3 OS=Homo sapiens OX=9606 GN=SART3 PE=1 SV=1	0	657	0	59974000	267	0.0262332	0	627	0	6	12	12	19.1	111.96	981	0	132.79	59974000	17			141
P07814;V9GYZ6;V9GZ76	Bifunctional glutamate/proline--tRNA ligase;Glutamate--tRNA ligase;Proline--tRNA ligase	EPRS	sp|P07814|SYEP_HUMAN Bifunctional glutamate/proline--tRNA ligase OS=Homo sapiens OX=9606 GN=EPRS1 PE=1 SV=5;tr|V9GYZ6|V9GYZ6_HUMAN Glutamyl-tRNA synthetase (Fragment) OS=Homo sapiens OX=9606 GN=EPRS1 PE=1 SV=1	894130	245	0.00960186	59756000	268	0.0261379	727800	348	0.00559624	3	22	22	25.3	170.59	1512	0	255.34	61378000	38			598
P54577;A0A6Q8PFX2;A0A0C4DGZ5;A0A6Q8PFX4;A0A6Q8PFC1;A0A6Q8PF15	Tyrosine--tRNA ligase, cytoplasmic;Tyrosine--tRNA ligase, cytoplasmic, N-terminally processed;Tyrosine--tRNA ligase	YARS	sp|P54577|SYYC_HUMAN Tyrosine--tRNA ligase, cytoplasmic OS=Homo sapiens OX=9606 GN=YARS1 PE=1 SV=4;tr|A0A6Q8PFX2|A0A6Q8PFX2_HUMAN Tyrosine--tRNA ligase OS=Homo sapiens OX=9606 GN=YARS1 PE=1 SV=1;tr|A0A0C4DGZ5|A0A0C4DGZ5_HUMAN Tyrosine--tRNA ligase OS=Homo	0	657	0	59736000	269	0.0261291	0	627	0	6	6	6	13.8	59.143	528	0	39.667	59736000	8			819
P52292;J3QLL0;J3KS65	Importin subunit alpha-1	KPNA2	sp|P52292|IMA1_HUMAN Importin subunit alpha-1 OS=Homo sapiens OX=9606 GN=KPNA2 PE=1 SV=1	672240	280	0.00721903	59716000	270	0.0261204	1115000	285	0.00857352	3	10	10	29.3	57.861	529	0	84.038	61503000	22			804
H0YMZ1;H0YL69;P25789;H0YMA1;H0YN18;H0YKT8;H0YLC2;H0YMI6;H0YKS0;H0YLS6;H0YMV3	Proteasome subunit alpha type;Proteasome subunit alpha type-4;Proteasome subunit beta type	PSMA4	tr|H0YMZ1|H0YMZ1_HUMAN Proteasome subunit alpha type (Fragment) OS=Homo sapiens OX=9606 GN=PSMA4 PE=1 SV=8;tr|H0YL69|H0YL69_HUMAN Proteasome subunit alpha type (Fragment) OS=Homo sapiens OX=9606 GN=PSMA4 PE=1 SV=1;sp|P25789|PSA4_HUMAN Proteasome subunit al	48959000	36	0.52576	59222000	271	0.0259043	47686000	37	0.36667	11	20	20	91.4	24.526	220	0	323.31	155870000	88			380
A0A2R8Y425;A0A2R8Y5J0;A0A2R8YFK9;A0A2U3TZM0;A0A2R8YFD8;F5GWX5;A0A2R8Y212;A0A2R8Y521;A0A0C4DGG9;Q14839;A0A2R8YD40;A0A2R8YDJ9;A0A2R8Y4X2;A0A2R8YDW2;A0A2R8YER1;A0A2R8Y8C1;A0A2R8Y445;A0A2R8Y685;A0A2R8Y5Z7;A0A2R8Y8B3;A0A2R8Y7M9;A0A2R8Y7I0;Q8TDI0;K7EMY3;Q12873;F2Z2R5;A0A5F9ZHX5;A0A2R8YE38;A0A2R8Y5M9;F6T542;I3L229;H7C3H7;F5H6N4;H7C0J3	Chromodomain-helicase-DNA-binding protein 4	CHD4	tr|A0A2R8Y425|A0A2R8Y425_HUMAN DNA helicase (Fragment) OS=Homo sapiens OX=9606 GN=CHD4 PE=1 SV=1;tr|A0A2R8Y5J0|A0A2R8Y5J0_HUMAN DNA helicase OS=Homo sapiens OX=9606 GN=CHD4 PE=1 SV=1;tr|A0A2R8YFK9|A0A2R8YFK9_HUMAN DNA helicase OS=Homo sapiens OX=9606 GN=CH	102350	559	0.00109911	58815000	272	0.0257263	534520	392	0.00411006	34	17	17	12.4	215.49	1889	0	130.02	59452000	28			70
U3KQK0;Q99880;Q99879;Q99877;Q93079;Q5QNW6;P62807;P58876;O60814;P57053	Histone H2B;Histone H2B type 1-L;Histone H2B type 1-M;Histone H2B type 1-N;Histone H2B type 1-H;Histone H2B type 2-F;Histone H2B type 1-C/E/F/G/I;Histone H2B type 1-D;Histone H2B type 1-K;Histone H2B type F-S	HIST1H2BN;HIST1H2BL;HIST1H2BM;HIST1H2BH;HIST2H2BF;HIST1H2BC;HIST1H2BD;HIST1H2BK;H2BFS	tr|U3KQK0|U3KQK0_HUMAN Histone H2B OS=Homo sapiens OX=9606 GN=H2BC15 PE=1 SV=1;sp|Q99880|H2B1L_HUMAN Histone H2B type 1-L OS=Homo sapiens OX=9606 GN=H2BC13 PE=1 SV=3;sp|Q99879|H2B1M_HUMAN Histone H2B type 1-M OS=Homo sapiens OX=9606 GN=H2BC14 PE=1 SV=3;sp|	1977600	167	0.021237	58638000	273	0.0256488	4666300	145	0.0358804	10	5	3	21.1	18.804	166	0	92.626	65282000	14			536
Q9BUF5;K7ESM5;K7EL29;K7ES63;K7EN98;K7ESQ3;K7EQT3;K7EJ64;K7ERA8;K7EJZ4;K7EPE5	Tubulin beta-6 chain	TUBB6	sp|Q9BUF5|TBB6_HUMAN Tubulin beta-6 chain OS=Homo sapiens OX=9606 GN=TUBB6 PE=1 SV=1;tr|K7ESM5|K7ESM5_HUMAN Tubulin beta chain (Fragment) OS=Homo sapiens OX=9606 GN=TUBB6 PE=1 SV=1	83971	587	0.000901746	58158000	274	0.0254389	971510	299	0.00747019	11	22	8	67.7	49.857	446	0	208.05	59214000	18			1132
P41091;Q2VIR3;H7BZU1	Eukaryotic translation initiation factor 2 subunit 3;Putative eukaryotic translation initiation factor 2 subunit 3-like protein	EIF2S3;EIF2S3L	sp|P41091|IF2G_HUMAN Eukaryotic translation initiation factor 2 subunit 3 OS=Homo sapiens OX=9606 GN=EIF2S3 PE=1 SV=3;sp|Q2VIR3|IF2GL_HUMAN Eukaryotic translation initiation factor 2 subunit 3B OS=Homo sapiens OX=9606 GN=EIF2S3B PE=2 SV=2	167950	479	0.00180358	57498000	275	0.0251502	587200	377	0.00451513	3	10	10	34.1	51.109	472	0	93.802	58254000	16			753
Q5T4S7;A0A0A0MSW0;X6R960;X6RE05;Q5TBN9	E3 ubiquitin-protein ligase UBR4	UBR4	sp|Q5T4S7|UBR4_HUMAN E3 ubiquitin-protein ligase UBR4 OS=Homo sapiens OX=9606 GN=UBR4 PE=1 SV=1	358580	357	0.00385071	56817000	276	0.0248523	351470	456	0.00270254	5	27	27	7.7	573.83	5183	0	191.95	57527000	37			1011
P49721;A0A087WVV1	Proteasome subunit beta type-2	PSMB2	sp|P49721|PSB2_HUMAN Proteasome subunit beta type-2 OS=Homo sapiens OX=9606 GN=PSMB2 PE=1 SV=1	28252000	45	0.303392	56749000	277	0.0248226	42098000	43	0.323702	2	17	17	93	22.836	201	0	323.31	127100000	68			788
P15880;H0YEN5;E9PQD7;I3L404;E9PM36;E9PMM9;E9PPT0	40S ribosomal protein S2	RPS2	sp|P15880|RS2_HUMAN 40S ribosomal protein S2 OS=Homo sapiens OX=9606 GN=RPS2 PE=1 SV=2;tr|H0YEN5|H0YEN5_HUMAN 40S ribosomal protein S2 (Fragment) OS=Homo sapiens OX=9606 GN=RPS2 PE=1 SV=1;tr|E9PQD7|E9PQD7_HUMAN 40S ribosomal protein S2 OS=Homo sapiens OX=9	104970	557	0.00112725	56666000	278	0.0247863	1169000	276	0.00898874	7	9	9	33.1	31.324	293	0	56.931	57940000	15			647
O14929;F8W9G7	Histone acetyltransferase type B catalytic subunit	HAT1	sp|O14929|HAT1_HUMAN Histone acetyltransferase type B catalytic subunit OS=Homo sapiens OX=9606 GN=HAT1 PE=1 SV=1	672950	279	0.00722666	56523000	279	0.0247237	350960	457	0.00269862	2	10	10	43	49.512	419	0	183.56	57547000	20			499
Q08945;E9PMD4;A0A0U1RRK2;E9PPZ7	FACT complex subunit SSRP1	SSRP1	sp|Q08945|SSRP1_HUMAN FACT complex subunit SSRP1 OS=Homo sapiens OX=9606 GN=SSRP1 PE=1 SV=1	0	657	0	56465000	280	0.0246984	0	627	0	4	10	10	21	81.074	709	0	81.407	56465000	11			915
Q08J23;A0A140T9Y7	tRNA (cytosine(34)-C(5))-methyltransferase	NSUN2	sp|Q08J23|NSUN2_HUMAN RNA cytosine C(5)-methyltransferase NSUN2 OS=Homo sapiens OX=9606 GN=NSUN2 PE=1 SV=2	175900	468	0.00188895	56392000	281	0.0246664	852960	313	0.00655863	2	15	15	32.2	86.47	767	0	150.73	57421000	26			916
P00558;P07205	Phosphoglycerate kinase 1	PGK1	sp|P00558|PGK1_HUMAN Phosphoglycerate kinase 1 OS=Homo sapiens OX=9606 GN=PGK1 PE=1 SV=3	1896500	174	0.0203661	56328000	282	0.0246384	2262200	203	0.0173946	2	12	12	38.6	44.614	417	0	225.68	60487000	34			576
A0A2R8Y811;P62263;E5RH77	40S ribosomal protein S14	RPS14	tr|A0A2R8Y811|A0A2R8Y811_HUMAN 40S ribosomal protein S14 (Fragment) OS=Homo sapiens OX=9606 GN=RPS14 PE=1 SV=1;sp|P62263|RS14_HUMAN 40S ribosomal protein S14 OS=Homo sapiens OX=9606 GN=RPS14 PE=1 SV=3;tr|E5RH77|E5RH77_HUMAN 40S ribosomal protein S14 OS=Hom	550420	317	0.00591084	56216000	283	0.0245894	2093300	212	0.0160959	3	8	8	61.3	16.159	150	0	65.613	58860000	16			114
B4DJV5;Q13610;F8VZ56	Periodic tryptophan protein 1 homolog	PWP1	tr|B4DJV5|B4DJV5_HUMAN Periodic tryptophan protein 1 homolog OS=Homo sapiens OX=9606 GN=PWP1 PE=1 SV=1;sp|Q13610|PWP1_HUMAN Periodic tryptophan protein 1 homolog OS=Homo sapiens OX=9606 GN=PWP1 PE=1 SV=1	0	657	0	55195000	284	0.0241428	0	627	0	3	7	7	28	49.038	439	0	46.769	55195000	13			191
Q5VVC8;P62913	60S ribosomal protein L11	RPL11	tr|Q5VVC8|Q5VVC8_HUMAN 60S ribosomal protein L11 OS=Homo sapiens OX=9606 GN=RPL11 PE=1 SV=2;sp|P62913|RL11_HUMAN 60S ribosomal protein L11 OS=Homo sapiens OX=9606 GN=RPL11 PE=1 SV=2	3010100	146	0.0323248	55006000	285	0.0240602	5755200	128	0.0442532	2	7	7	37.1	19.024	167	0	80.769	63771000	20			870
O43776	Asparagine--tRNA ligase, cytoplasmic	NARS	sp|O43776|SYNC_HUMAN Asparagine--tRNA ligase, cytoplasmic OS=Homo sapiens OX=9606 GN=NARS1 PE=1 SV=1	0	657	0	54911000	286	0.0240186	0	627	0	1	8	8	20.3	62.942	548	0	65.51	54911000	10			517
Q15366;H3BSS4	Poly(rC)-binding protein 2	PCBP2	sp|Q15366|PCBP2_HUMAN Poly(rC)-binding protein 2 OS=Homo sapiens OX=9606 GN=PCBP2 PE=1 SV=1	686250	278	0.00736948	54241000	287	0.0237256	709870	353	0.00545837	2	6	1	28.2	38.58	365	0	139.31	55637000	13			975
P25398	40S ribosomal protein S12	RPS12	sp|P25398|RS12_HUMAN 40S ribosomal protein S12 OS=Homo sapiens OX=9606 GN=RPS12 PE=1 SV=3	71329	606	0.000765986	54035000	288	0.0236354	255810	516	0.00196699	1	4	4	48.5	14.515	132	0	57.526	54362000	11			688
P55060	Exportin-2	CSE1L	sp|P55060|XPO2_HUMAN Exportin-2 OS=Homo sapiens OX=9606 GN=CSE1L PE=1 SV=3	861400	251	0.00925038	53793000	289	0.0235296	1477600	247	0.0113616	1	19	19	29.8	110.42	971	0	282.03	56132000	37			822
P61247;D6RG13;E9PFI5;H0Y9Y4;D6RAT0;H0Y8L7;D6RB09;D6R9B6;D6RI02;D6RAS7;D6RED7;D6RGE0	40S ribosomal protein S3a	RPS3A	sp|P61247|RS3A_HUMAN 40S ribosomal protein S3a OS=Homo sapiens OX=9606 GN=RPS3A PE=1 SV=2;tr|D6RG13|D6RG13_HUMAN 40S ribosomal protein S3a (Fragment) OS=Homo sapiens OX=9606 GN=RPS3A PE=1 SV=1;tr|E9PFI5|E9PFI5_HUMAN 40S ribosomal protein S3a OS=Homo sapien	609930	294	0.0065499	53765000	290	0.0235173	1369100	261	0.0105274	12	8	8	34.5	29.945	264	0	90.092	55744000	14			842
P62280;M0QZC5;M0R1H5;M0R1H6	40S ribosomal protein S11	RPS11	sp|P62280|RS11_HUMAN 40S ribosomal protein S11 OS=Homo sapiens OX=9606 GN=RPS11 PE=1 SV=3;tr|M0QZC5|M0QZC5_HUMAN 40S ribosomal protein S11 OS=Homo sapiens OX=9606 GN=RPS11 PE=1 SV=1	905940	240	0.00972869	53680000	291	0.0234802	943500	301	0.00725481	4	7	7	51.3	18.431	158	0	42.956	55529000	12			858
P62937;F8WE65;C9J5S7;E5RIZ5	Peptidyl-prolyl cis-trans isomerase A;Peptidyl-prolyl cis-trans isomerase A, N-terminally processed;Peptidyl-prolyl cis-trans isomerase	PPIA	sp|P62937|PPIA_HUMAN Peptidyl-prolyl cis-trans isomerase A OS=Homo sapiens OX=9606 GN=PPIA PE=1 SV=2;tr|F8WE65|F8WE65_HUMAN Peptidyl-prolyl cis-trans isomerase OS=Homo sapiens OX=9606 GN=PPIA PE=1 SV=1;tr|C9J5S7|C9J5S7_HUMAN Peptidyl-prolyl cis-trans isome	2444600	157	0.026252	53637000	292	0.0234614	2153300	208	0.0165573	4	8	8	62.4	18.012	165	0	94.433	58235000	19			871
Q15365	Poly(rC)-binding protein 1	PCBP1	sp|Q15365|PCBP1_HUMAN Poly(rC)-binding protein 1 OS=Homo sapiens OX=9606 GN=PCBP1 PE=1 SV=2	0	657	0	52187000	293	0.0228271	341730	458	0.00262765	1	6	5	31.2	37.497	356	0	34.696	52528000	7			974
P60866;E5RIP1;E5RJX2;G3XAN0	40S ribosomal protein S20	RPS20	sp|P60866|RS20_HUMAN 40S ribosomal protein S20 OS=Homo sapiens OX=9606 GN=RPS20 PE=1 SV=1;tr|E5RIP1|E5RIP1_HUMAN 40S ribosomal protein S20 OS=Homo sapiens OX=9606 GN=RPS20 PE=1 SV=1;tr|E5RJX2|E5RJX2_HUMAN 40S ribosomal protein S20 OS=Homo sapiens OX=9606 G	275870	403	0.00296251	52149000	294	0.0228105	523640	395	0.0040264	4	2	2	19.3	13.373	119	0	16.514	52948000	5			834
P52597;A0A1B0GW42	Heterogeneous nuclear ribonucleoprotein F;Heterogeneous nuclear ribonucleoprotein F, N-terminally processed	HNRNPF	sp|P52597|HNRPF_HUMAN Heterogeneous nuclear ribonucleoprotein F OS=Homo sapiens OX=9606 GN=HNRNPF PE=1 SV=3	331750	373	0.00356259	52108000	295	0.0227926	802890	325	0.00617363	2	9	7	34.7	45.671	415	0	128.21	53243000	16			806
O00487;C9JW37	26S proteasome non-ATPase regulatory subunit 14	PSMD14	sp|O00487|PSDE_HUMAN 26S proteasome non-ATPase regulatory subunit 14 OS=Homo sapiens OX=9606 GN=PSMD14 PE=1 SV=1	1856400	176	0.0199355	51850000	296	0.0226797	2952600	182	0.0227033	2	9	9	53.2	34.577	310	0	187.62	56659000	29			488
Q12765;C9K052;B8ZZP4;C9J7U9	Secernin-1	SCRN1	sp|Q12765|SCRN1_HUMAN Secernin-1 OS=Homo sapiens OX=9606 GN=SCRN1 PE=1 SV=2;tr|C9K052|C9K052_HUMAN Secernin-1 (Fragment) OS=Homo sapiens OX=9606 GN=SCRN1 PE=1 SV=1;tr|B8ZZP4|B8ZZP4_HUMAN Secernin-1 OS=Homo sapiens OX=9606 GN=SCRN1 PE=1 SV=1;tr|C9J7U9|C9J7U	71388	604	0.00076662	51768000	297	0.0226438	0	627	0	4	8	8	26.8	46.382	414	0	116.74	51840000	14			921
O00299	Chloride intracellular channel protein 1	CLIC1	sp|O00299|CLIC1_HUMAN Chloride intracellular channel protein 1 OS=Homo sapiens OX=9606 GN=CLIC1 PE=1 SV=4	546570	318	0.00586949	51765000	298	0.0226425	1234900	267	0.00949546	1	9	9	51	26.922	241	0	86.537	53547000	21			484
Q92616	Translational activator GCN1	GCN1L1	sp|Q92616|GCN1_HUMAN eIF-2-alpha kinase activator GCN1 OS=Homo sapiens OX=9606 GN=GCN1 PE=1 SV=6	724120	268	0.00777616	51597000	299	0.022569	543300	388	0.00417757	1	28	28	16	292.75	2671	0	225.24	52864000	37			1081
Q14683;G8JLG1;A0A6Q8PHC3;V9GYN9;V9GY57	Structural maintenance of chromosomes protein 1A;Structural maintenance of chromosomes protein	SMC1A	sp|Q14683|SMC1A_HUMAN Structural maintenance of chromosomes protein 1A OS=Homo sapiens OX=9606 GN=SMC1A PE=1 SV=2;tr|G8JLG1|G8JLG1_HUMAN Structural maintenance of chromosomes protein OS=Homo sapiens OX=9606 GN=SMC1A PE=1 SV=2;tr|A0A6Q8PHC3|A0A6Q8PHC3_HUMAN	277420	402	0.00297915	51558000	300	0.022552	2985100	181	0.0229532	5	20	20	21.7	143.23	1233	0	323.31	54821000	30			961
P10599	Thioredoxin	TXN	sp|P10599|THIO_HUMAN Thioredoxin OS=Homo sapiens OX=9606 GN=TXN PE=1 SV=3	128460	527	0.0013795	51520000	301	0.0225354	0	627	0	1	4	4	42.9	11.737	105	0	25.996	51649000	5			613
P31689	DnaJ homolog subfamily A member 1	DNAJA1	sp|P31689|DNJA1_HUMAN DnaJ homolog subfamily A member 1 OS=Homo sapiens OX=9606 GN=DNAJA1 PE=1 SV=2	427780	339	0.00459383	50734000	302	0.0221916	1484800	246	0.011417	1	9	9	39.5	44.868	397	0	103.97	52646000	16			717
Q15181;Q5SQT6	Inorganic pyrophosphatase	PPA1	sp|Q15181|IPYR_HUMAN Inorganic pyrophosphatase OS=Homo sapiens OX=9606 GN=PPA1 PE=1 SV=2;tr|Q5SQT6|Q5SQT6_HUMAN Inorganic diphosphatase OS=Homo sapiens OX=9606 GN=PPA1 PE=1 SV=1	202350	446	0.00217299	50643000	303	0.0221518	0	627	0	2	8	8	49.8	32.66	289	0	97.278	50845000	12			972
Q5EBL4;A0A1B0GVV3	RILP-like protein 1	RILPL1	sp|Q5EBL4|RIPL1_HUMAN RILP-like protein 1 OS=Homo sapiens OX=9606 GN=RILPL1 PE=1 SV=1;tr|A0A1B0GVV3|A0A1B0GVV3_HUMAN RILP-like protein 1 OS=Homo sapiens OX=9606 GN=RILPL1 PE=1 SV=1	0	657	0	50085000	304	0.0219077	20655	624	0.000158822	2	12	12	43.9	47.107	403	0	140.1	50106000	16			1003
F8VZ49;F8W6I7;P09651;Q32P51;A0A2R8Y4L2;F8VTQ5;F8W646;F8VYN5;H0YH80	Heterogeneous nuclear ribonucleoprotein A1;Heterogeneous nuclear ribonucleoprotein A1, N-terminally processed;Heterogeneous nuclear ribonucleoprotein A1-like 2	HNRNPA1;HNRNPA1L2	tr|F8VZ49|F8VZ49_HUMAN Helix-destabilizing protein (Fragment) OS=Homo sapiens OX=9606 GN=HNRNPA1 PE=1 SV=1;tr|F8W6I7|F8W6I7_HUMAN Helix-destabilizing protein OS=Homo sapiens OX=9606 GN=HNRNPA1 PE=1 SV=2;sp|P09651|ROA1_HUMAN Heterogeneous nuclear ribonucleo	127690	528	0.00137123	49655000	305	0.0217196	1319900	264	0.0101491	9	9	9	42.9	25.687	231	0	138.91	51103000	14			337
I3L397;I3L504;P63241;Q6IS14;F8WCJ1;C9J7B5;C9J4W5;Q9GZV4	Eukaryotic translation initiation factor 5A;Eukaryotic translation initiation factor 5A-1;Eukaryotic translation initiation factor 5A-1-like;Eukaryotic translation initiation factor 5A-2	EIF5A;EIF5AL1;EIF5A2	tr|I3L397|I3L397_HUMAN Eukaryotic translation initiation factor 5A (Fragment) OS=Homo sapiens OX=9606 GN=EIF5A PE=1 SV=8;tr|I3L504|I3L504_HUMAN Eukaryotic translation initiation factor 5A-1 OS=Homo sapiens OX=9606 GN=EIF5A PE=1 SV=1;sp|P63241|IF5A1_HUMAN E	124990	534	0.00134224	49585000	306	0.021689	1225000	269	0.00941934	8	8	8	58.9	16.019	146	0	90.562	50935000	18			404
A0A6Q8PGW4;A0A6Q8PGI6;A0A6Q8PGA8;A0A6Q8PHH9;A0A6Q8PGZ8;P41250;A0A6Q8PFZ6;H7C443;A0A6Q8PHI7;A0A6Q8PGZ9;F8WCK4;A0A6Q8PGN7;A0A6Q8PH49;A0A6Q8PF45;A0A6Q8PFV5	Glycine--tRNA ligase	GARS	tr|A0A6Q8PGW4|A0A6Q8PGW4_HUMAN Diadenosine tetraphosphate synthetase OS=Homo sapiens OX=9606 GN=GARS1 PE=1 SV=1;tr|A0A6Q8PGI6|A0A6Q8PGI6_HUMAN Diadenosine tetraphosphate synthetase OS=Homo sapiens OX=9606 GN=GARS1 PE=1 SV=1;tr|A0A6Q8PGA8|A0A6Q8PGA8_HUMAN D	0	657	0	49324000	307	0.0215748	81876	613	0.000629566	15	9	9	21.6	69.931	616	0	69.129	49406000	13			160
P50570;E5RHK8;Q9UQ16;K7EMQ3;A0A1B0GUX5;E5RIK2;A0A0D9SFB1;A0A0U1RQP1;A0A0D9SFE4;Q05193	Dynamin-2	DNM2	sp|P50570|DYN2_HUMAN Dynamin-2 OS=Homo sapiens OX=9606 GN=DNM2 PE=1 SV=2	488460	329	0.00524546	49318000	308	0.0215722	1466600	250	0.0112771	10	15	15	20.7	98.063	870	0	105.62	51273000	25			793
E5RI99;P62888;A0A0B4J213;E5RJH3;A0A0C4DH44	60S ribosomal protein L30	RPL30	tr|E5RI99|E5RI99_HUMAN 60S ribosomal protein L30 (Fragment) OS=Homo sapiens OX=9606 GN=RPL30 PE=1 SV=1;sp|P62888|RL30_HUMAN 60S ribosomal protein L30 OS=Homo sapiens OX=9606 GN=RPL30 PE=1 SV=2	338250	363	0.00363239	48807000	309	0.0213487	704600	354	0.00541785	5	5	5	51.8	12.656	114	0	65.437	49849000	12			263
A0A3B3IRI2;P17812;A0A3B3IRQ8;A0A3B3ITF6;A0A3B3ITB8;B4E1E0;A0A3B3ITH9;Q9NRF8	CTP synthase 1;CTP synthase	CTPS1	tr|A0A3B3IRI2|A0A3B3IRI2_HUMAN CTP synthase OS=Homo sapiens OX=9606 GN=CTPS1 PE=1 SV=1;sp|P17812|PYRG1_HUMAN CTP synthase 1 OS=Homo sapiens OX=9606 GN=CTPS1 PE=1 SV=2;tr|A0A3B3IRQ8|A0A3B3IRQ8_HUMAN CTP synthase OS=Homo sapiens OX=9606 GN=CTPS1 PE=1 SV=1;tr	225400	431	0.00242052	48376000	310	0.0211601	769940	334	0.00592027	8	12	12	28.2	63.723	564	0	106.89	49371000	28			123
K7EK07;P84243	Histone H3;Histone H3.3	H3F3B;H3F3A	tr|K7EK07|K7EK07_HUMAN Histone H3 (Fragment) OS=Homo sapiens OX=9606 GN=H3-3B PE=1 SV=1;sp|P84243|H33_HUMAN Histone H3.3 OS=Homo sapiens OX=9606 GN=H3-3A PE=1 SV=2	337870	364	0.00362831	48302000	311	0.0211278	2343500	199	0.0180198	2	3	2	30.3	14.914	132	0	24.934	50983000	25			428
lcl|NC_017825.1_prot_YP_006272968.1_20	22K	db_xref=GeneID:12657123	lcl|NC_017825.1_prot_YP_006272968.1_20 [locus_tag=YOE_gp20] [db_xref=GeneID:12657123] [protein=22K] [protein_id=YP_006272968.1] [location=25544..26098] [gbkey=CDS]	274860	404	0.00295166	47853000	312	0.0209314	471150	404	0.00362279	1	7	6	40.2	20.916	184	0	234.09	48599000	9			459
A0A087WWD4;P13591;H7BYX6;A0A087WTE4;A0A087WTF6;A0A087WX77;A0A087WV75;A0A087X1V2;A0A087WVU1;A0A0D9SF98;A0A087WWJ5;A0A0C4DGS4;A0A087WTR3;A0A087WZS4	Neural cell adhesion molecule 1	NCAM1	tr|A0A087WWD4|A0A087WWD4_HUMAN Neural cell adhesion molecule 1 OS=Homo sapiens OX=9606 GN=NCAM1 PE=1 SV=1;sp|P13591|NCAM1_HUMAN Neural cell adhesion molecule 1 OS=Homo sapiens OX=9606 GN=NCAM1 PE=1 SV=3;tr|H7BYX6|H7BYX6_HUMAN Neural cell adhesion molecule	802660	259	0.00861959	47653000	313	0.0208439	539770	390	0.00415043	14	9	9	16.4	97.344	884	0	147.89	48995000	16			27
O75607	Nucleoplasmin-3	NPM3	sp|O75607|NPM3_HUMAN Nucleoplasmin-3 OS=Homo sapiens OX=9606 GN=NPM3 PE=1 SV=3	0	657	0	47475000	314	0.020766	402790	423	0.00309716	1	4	4	41	19.343	178	0	43.916	47878000	8			547
K7EJE8;K7EKE6;P36776;K7ER27;K7ER56;K7ERR6;K7EQF8	Lon protease homolog, mitochondrial	LONP1	tr|K7EJE8|K7EJE8_HUMAN Lon protease homolog, mitochondrial OS=Homo sapiens OX=9606 GN=LONP1 PE=1 SV=1;tr|K7EKE6|K7EKE6_HUMAN Lon protease homolog, mitochondrial OS=Homo sapiens OX=9606 GN=LONP1 PE=1 SV=1;sp|P36776|LONM_HUMAN Lon protease homolog, mitochond	211140	440	0.00226739	47379000	315	0.020724	288730	489	0.00222012	7	13	13	29	93.296	829	0	116.84	47879000	26			425
A0A2R8Y804;A0A2R8Y543;B4DGU4;A0A2R8YCH5;A0A2R8Y5A3;P35222;A0A2R8Y5C3;A0A2R8Y750;A0A2R8Y7Z0;A0A2R8Y5Z1;A0A2R8Y6G0;A0A2R8Y815;P14923;A0A2R8YG06	Catenin beta-1	CTNNB1	tr|A0A2R8Y804|A0A2R8Y804_HUMAN Catenin beta-1 OS=Homo sapiens OX=9606 GN=CTNNB1 PE=1 SV=1;tr|A0A2R8Y543|A0A2R8Y543_HUMAN Catenin beta-1 OS=Homo sapiens OX=9606 GN=CTNNB1 PE=1 SV=1;tr|B4DGU4|B4DGU4_HUMAN Catenin beta-1 OS=Homo sapiens OX=9606 GN=CTNNB1 PE=1	970640	232	0.0104235	47251000	316	0.0206681	746170	341	0.00573749	14	14	14	26.9	77.206	702	0	209.23	48968000	24			104
Q32P28;E2QRI1;H7C2W6	Prolyl 3-hydroxylase 1	LEPRE1	sp|Q32P28|P3H1_HUMAN Prolyl 3-hydroxylase 1 OS=Homo sapiens OX=9606 GN=P3H1 PE=1 SV=2	141080	510	0.00151503	47224000	317	0.0206562	0	627	0	3	9	9	17.3	83.393	736	0	65.064	47365000	14			996
P15170;H3BR35;H3BSV8	Eukaryotic peptide chain release factor GTP-binding subunit ERF3A	GSPT1	sp|P15170|ERF3A_HUMAN Eukaryotic peptide chain release factor GTP-binding subunit ERF3A OS=Homo sapiens OX=9606 GN=GSPT1 PE=1 SV=1;tr|H3BR35|H3BR35_HUMAN Eukaryotic peptide chain release factor GTP-binding subunit ERF3A (Fragment) OS=Homo sapiens OX=9606 G	588620	303	0.00632106	47187000	318	0.0206401	180670	558	0.00138922	3	11	5	29.9	55.755	499	0	105.94	47956000	16			646
Q9UBT2;K7EPL2;U3KQ93;K7ESK7;U3KQ55;K7ES38	SUMO-activating enzyme subunit 2	UBA2	sp|Q9UBT2|SAE2_HUMAN SUMO-activating enzyme subunit 2 OS=Homo sapiens OX=9606 GN=UBA2 PE=1 SV=2;tr|K7EPL2|K7EPL2_HUMAN SUMO-activating enzyme subunit 2 (Fragment) OS=Homo sapiens OX=9606 GN=UBA2 PE=1 SV=2	2642300	152	0.0283751	46245000	319	0.020228	1685600	234	0.012961	6	16	16	42	71.223	640	0	146.08	50573000	30			1197
P12004	Proliferating cell nuclear antigen	PCNA	sp|P12004|PCNA_HUMAN Proliferating cell nuclear antigen OS=Homo sapiens OX=9606 GN=PCNA PE=1 SV=1	882970	248	0.00948202	45995000	320	0.0201187	558490	383	0.00429437	1	6	6	30.7	28.768	261	0	91.507	47437000	13			623
Q15021;E7EN77;F5H431;F5GZK7	Condensin complex subunit 1	NCAPD2	sp|Q15021|CND1_HUMAN Condensin complex subunit 1 OS=Homo sapiens OX=9606 GN=NCAPD2 PE=1 SV=3;tr|E7EN77|E7EN77_HUMAN Condensin complex subunit 1 (Fragment) OS=Homo sapiens OX=9606 GN=NCAPD2 PE=1 SV=2	132450	521	0.00142235	45943000	321	0.0200959	923330	303	0.00709972	4	20	20	18.8	157.18	1401	0	159.58	46999000	26			966
Q13907;C9JD53	Isopentenyl-diphosphate Delta-isomerase 1	IDI1	sp|Q13907|IDI1_HUMAN Isopentenyl-diphosphate Delta-isomerase 1 OS=Homo sapiens OX=9606 GN=IDI1 PE=1 SV=2	97042	568	0.00104211	45059000	322	0.0197093	0	627	0	2	7	7	48.9	26.319	227	0	48.571	45156000	10			950
Q9UQE7	Structural maintenance of chromosomes protein 3	SMC3	sp|Q9UQE7|SMC3_HUMAN Structural maintenance of chromosomes protein 3 OS=Homo sapiens OX=9606 GN=SMC3 PE=1 SV=2	979120	230	0.0105145	44828000	323	0.0196082	2084300	214	0.0160267	1	24	24	25.2	141.54	1217	0	216.24	47892000	36			1223
Q9UMS4;F5GY56;F5H2I0	Pre-mRNA-processing factor 19	PRPF19	sp|Q9UMS4|PRP19_HUMAN Pre-mRNA-processing factor 19 OS=Homo sapiens OX=9606 GN=PRPF19 PE=1 SV=1;tr|F5GY56|F5GY56_HUMAN Pre-mRNA-processing factor 19 (Fragment) OS=Homo sapiens OX=9606 GN=PRPF19 PE=1 SV=1	561890	310	0.00603401	44573000	324	0.0194967	579340	380	0.00445469	3	8	8	31.9	55.18	504	0	77.094	45715000	17			1213
P53618;E9PP73;E9PP63;E9PKQ1	Coatomer subunit beta	COPB1	sp|P53618|COPB_HUMAN Coatomer subunit beta OS=Homo sapiens OX=9606 GN=COPB1 PE=1 SV=3;tr|E9PP73|E9PP73_HUMAN Coatomer subunit beta (Fragment) OS=Homo sapiens OX=9606 GN=COPB1 PE=1 SV=8	240920	424	0.00258719	44475000	325	0.0194538	133100	588	0.00102344	4	13	13	19.6	107.14	953	0	244.36	44849000	21			814
Q71DI3	Histone H3.2	HIST2H3A	sp|Q71DI3|H32_HUMAN Histone H3.2 OS=Homo sapiens OX=9606 GN=H3C15 PE=1 SV=3	107180	554	0.00115098	44190000	326	0.0193291	355330	453	0.00273222	1	2	1	28.7	15.388	136	0	19.017	44652000	18			1034
P61201;B4DIH5;H0YKU5;H0YM03;H0YMC2	COP9 signalosome complex subunit 2	COPS2	sp|P61201|CSN2_HUMAN COP9 signalosome complex subunit 2 OS=Homo sapiens OX=9606 GN=COPS2 PE=1 SV=1;tr|B4DIH5|B4DIH5_HUMAN COP9 signalosome complex subunit 2 OS=Homo sapiens OX=9606 GN=COPS2 PE=1 SV=1	1887100	175	0.0202651	43921000	327	0.0192115	2132700	210	0.0163989	5	15	15	47.9	51.596	443	0	152.21	47941000	35			840
Q9NY27;C9IZ04;F8WCA1;C9IZF4;H7C559;F8WDK3	Serine/threonine-protein phosphatase 4 regulatory subunit 2	PPP4R2	sp|Q9NY27|PP4R2_HUMAN Serine/threonine-protein phosphatase 4 regulatory subunit 2 OS=Homo sapiens OX=9606 GN=PPP4R2 PE=1 SV=3;tr|C9IZ04|C9IZ04_HUMAN Serine/threonine-protein phosphatase 4 regulatory subunit 2 (Fragment) OS=Homo sapiens OX=9606 GN=PPP4R2 PE	170100	474	0.00182667	43878000	328	0.0191927	311380	476	0.00239428	6	10	10	28.1	46.898	417	0	119.92	44359000	20			1180
P67775;P62714;H0YC23;E5RHC1;H0YBN9;E5RI56	Serine/threonine-protein phosphatase 2A catalytic subunit alpha isoform;Serine/threonine-protein phosphatase 2A catalytic subunit beta isoform	PPP2CA;PPP2CB	sp|P67775|PP2AA_HUMAN Serine/threonine-protein phosphatase 2A catalytic subunit alpha isoform OS=Homo sapiens OX=9606 GN=PPP2CA PE=1 SV=1;sp|P62714|PP2AB_HUMAN Serine/threonine-protein phosphatase 2A catalytic subunit beta isoform OS=Homo sapiens OX=9606 G	645690	285	0.00693392	43659000	329	0.0190969	726590	349	0.00558694	6	8	6	37.2	35.594	309	0	109.47	45032000	17			881
P28074;H0YJM8	Proteasome subunit beta type-5	PSMB5	sp|P28074|PSB5_HUMAN Proteasome subunit beta type-5 OS=Homo sapiens OX=9606 GN=PSMB5 PE=1 SV=3	45388000	37	0.487412	43632000	330	0.0190851	41976000	44	0.322764	2	22	22	65.8	28.48	263	0	323.31	131000000	62			706
P25788;G3V4X5;G3V3W4;G3V5N4;H0YJ03	Proteasome subunit alpha type-3	PSMA3	sp|P25788|PSA3_HUMAN Proteasome subunit alpha type-3 OS=Homo sapiens OX=9606 GN=PSMA3 PE=1 SV=2	34537000	41	0.370885	43625000	331	0.019082	36336000	45	0.279397	5	20	20	63.1	28.433	255	0	185.42	114500000	53			692
E7ESY4;Q13330;H0Y4T7;F8W9Y9;H7C3F3;H0YIT0	Metastasis-associated protein MTA1	MTA1	tr|E7ESY4|E7ESY4_HUMAN Metastasis-associated protein MTA1 OS=Homo sapiens OX=9606 GN=MTA1 PE=1 SV=1;sp|Q13330|MTA1_HUMAN Metastasis-associated protein MTA1 OS=Homo sapiens OX=9606 GN=MTA1 PE=1 SV=2;tr|H0Y4T7|H0Y4T7_HUMAN Metastasis-associated protein MTA1	358180	358	0.00384641	43039000	332	0.0188257	217720	537	0.00167411	6	11	9	20.2	79.372	703	0	68.27	43615000	14			273
C9JFE4;A0A096LP07;A0A096LPJ3;A8K070;Q13098;J3KSA5;J3QLT0;J3KRJ4;J3QS84;J3QS88;J3KTB0;J3QLE8;J3QL53;J3KRE8;J3QQX0	COP9 signalosome complex subunit 1	GPS1	tr|C9JFE4|C9JFE4_HUMAN COP9 signalosome complex subunit 1 OS=Homo sapiens OX=9606 GN=GPS1 PE=1 SV=2;tr|A0A096LP07|A0A096LP07_HUMAN COP9 signalosome complex subunit 1 OS=Homo sapiens OX=9606 GN=GPS1 PE=1 SV=1;tr|A0A096LPJ3|A0A096LPJ3_HUMAN COP9 signalosome	617500	290	0.00663119	42976000	333	0.0187981	1689100	233	0.0129879	15	8	8	24.2	53.371	471	0	63.03	45283000	11			49
M0R3D6;M0R1A7;M0R117;Q02543;M0R0P7	60S ribosomal protein L18a	RPL18A	tr|M0R3D6|M0R3D6_HUMAN 60S ribosomal protein L18a (Fragment) OS=Homo sapiens OX=9606 GN=RPL18A PE=1 SV=1;tr|M0R1A7|M0R1A7_HUMAN 60S ribosomal protein L18a OS=Homo sapiens OX=9606 GN=RPL18A PE=1 SV=1;tr|M0R117|M0R117_HUMAN 60S ribosomal protein L18a OS=Homo	1028200	222	0.0110416	42597000	334	0.0186324	1210600	271	0.00930861	5	9	9	55.3	16.714	141	0	103.02	44835000	17			473
Q12888;A6NNK5;C9JXV0;H7BZY0;H7C3N7;M0R142	Tumor suppressor p53-binding protein 1	TP53BP1	sp|Q12888|TP53B_HUMAN TP53-binding protein 1 OS=Homo sapiens OX=9606 GN=TP53BP1 PE=1 SV=2;tr|A6NNK5|A6NNK5_HUMAN TP53-binding protein 1 OS=Homo sapiens OX=9606 GN=TP53BP1 PE=1 SV=2	746030	265	0.00801145	42470000	335	0.0185768	310740	477	0.00238936	6	18	18	15.4	213.57	1972	0	187.36	43527000	27			925
Q9BQ67;M0QX71	Glutamate-rich WD repeat-containing protein 1	GRWD1	sp|Q9BQ67|GRWD1_HUMAN Glutamate-rich WD repeat-containing protein 1 OS=Homo sapiens OX=9606 GN=GRWD1 PE=1 SV=1;tr|M0QX71|M0QX71_HUMAN Glutamate-rich WD repeat-containing protein 1 (Fragment) OS=Homo sapiens OX=9606 GN=GRWD1 PE=1 SV=1	0	657	0	42028000	336	0.0183835	326780	465	0.0025127	2	8	8	34.3	49.419	446	0	71.345	42355000	17			1126
F5H5D3;Q9BQE3;A0A1W2PQM2;F8VVB9;F8VS66;F8VRZ4;F8VX09;F8VWV9;F8VRK0;F8W0F6;F8VXZ7	Tubulin alpha-1C chain	TUBA1C	tr|F5H5D3|F5H5D3_HUMAN Tubulin alpha chain OS=Homo sapiens OX=9606 GN=TUBA1C PE=1 SV=1;sp|Q9BQE3|TBA1C_HUMAN Tubulin alpha-1C chain OS=Homo sapiens OX=9606 GN=TUBA1C PE=1 SV=1;tr|A0A1W2PQM2|A0A1W2PQM2_HUMAN Tubulin alpha-1C chain OS=Homo sapiens OX=9606 GN	1041800	219	0.0111877	42026000	337	0.0183826	1422600	255	0.0109387	11	38	2	69.7	57.73	519	0	150.04	44491000	10			325
F8W9S7;Q14C86;C9IZ08;H0Y4E7;H0Y7I9;B0QZ65;B4DGD8;A0A0A0MQV8;C9IZX9	GTPase-activating protein and VPS9 domain-containing protein 1	GAPVD1	tr|F8W9S7|F8W9S7_HUMAN GTPase-activating protein and VPS9 domain-containing protein 1 OS=Homo sapiens OX=9606 GN=GAPVD1 PE=1 SV=1;sp|Q14C86|GAPD1_HUMAN GTPase-activating protein and VPS9 domain-containing protein 1 OS=Homo sapiens OX=9606 GN=GAPVD1 PE=1 SV	845300	254	0.00907749	41936000	338	0.0183432	2085100	213	0.0160329	9	16	16	18.1	157.46	1412	0	122.45	44866000	23			343
Q9Y285;K7ER00;K7ER16;K7EPH2;K7EK06	Phenylalanine--tRNA ligase alpha subunit	FARSA	sp|Q9Y285|SYFA_HUMAN Phenylalanine--tRNA ligase alpha subunit OS=Homo sapiens OX=9606 GN=FARSA PE=1 SV=3;tr|K7ER00|K7ER00_HUMAN Phenylalanine--tRNA ligase OS=Homo sapiens OX=9606 GN=FARSA PE=1 SV=1;tr|K7ER16|K7ER16_HUMAN Phenylalanine--tRNA ligase alpha su	974100	231	0.0104606	41908000	339	0.018331	1572800	239	0.0120937	5	9	9	32.5	57.563	508	0	155.08	44455000	18			1227
P18085;C9JPM4;C9JAK5;U3KQF2	ADP-ribosylation factor 4	ARF4	sp|P18085|ARF4_HUMAN ADP-ribosylation factor 4 OS=Homo sapiens OX=9606 GN=ARF4 PE=1 SV=3;tr|C9JPM4|C9JPM4_HUMAN ADP-ribosylation factor 4 (Fragment) OS=Homo sapiens OX=9606 GN=ARF4 PE=1 SV=1;tr|C9JAK5|C9JAK5_HUMAN ADP-ribosylation factor 4 OS=Homo sapiens	113760	549	0.00122164	41906000	340	0.0183301	168680	569	0.00129702	4	6	3	47.2	20.511	180	0	51.768	42189000	9			656
Q8NBJ4;F8WAT9;C9JYM4;C9J941	Golgi membrane protein 1	GOLM1	sp|Q8NBJ4|GOLM1_HUMAN Golgi membrane protein 1 OS=Homo sapiens OX=9606 GN=GOLM1 PE=1 SV=1	5750500	106	0.0617533	41902000	341	0.0183284	6442100	120	0.049535	4	16	16	35.9	45.333	401	0	323.31	54094000	39			1063
H0Y8C6;O00410;H0Y3V4;E7ETV3;E7EV12;E7EQT5;C9J875;C9JQT6;C9JZD8;E7ETV8;E7ESZ1;E7EWK4;E7EX05;O60518	Importin-5	IPO5	tr|H0Y8C6|H0Y8C6_HUMAN Importin-5 (Fragment) OS=Homo sapiens OX=9606 GN=IPO5 PE=1 SV=1;sp|O00410|IPO5_HUMAN Importin-5 OS=Homo sapiens OX=9606 GN=IPO5 PE=1 SV=4	5282500	111	0.0567276	41663000	342	0.0182238	2237400	204	0.0172039	14	22	22	28.3	123.75	1099	0	223.49	49182000	44			364
Q13151	Heterogeneous nuclear ribonucleoprotein A0	HNRNPA0	sp|Q13151|ROA0_HUMAN Heterogeneous nuclear ribonucleoprotein A0 OS=Homo sapiens OX=9606 GN=HNRNPA0 PE=1 SV=1	121440	539	0.00130412	41561000	343	0.0181792	0	627	0	1	4	4	23.6	30.84	305	0	73.698	41683000	8			933
P56192;H0YHV5;H0YIP0;H0YIC2;F8VS26;H0YHL6;F8W0M7;F8W0S4;F8VZZ9;H0YI94;H0YI27;F5H2V6	Methionine--tRNA ligase, cytoplasmic	MARS	sp|P56192|SYMC_HUMAN Methionine--tRNA ligase, cytoplasmic OS=Homo sapiens OX=9606 GN=MARS1 PE=1 SV=2	822160	257	0.00882899	41237000	344	0.0180375	1758000	225	0.0135177	12	13	13	26	101.11	900	0	106.62	43817000	26			826
P62269;A0A0G2JQH2;Q5GGW2;J3JS69	40S ribosomal protein S18	RPS18	sp|P62269|RS18_HUMAN 40S ribosomal protein S18 OS=Homo sapiens OX=9606 GN=RPS18 PE=1 SV=3	1018200	225	0.0109342	41173000	345	0.0180095	2296500	201	0.0176584	4	5	5	40.8	17.718	152	0	37.331	44487000	10			857
J3KS05;P83916;K7ELA4;B5MD17;C9JWS9	Chromobox protein homolog 1	CBX1	tr|J3KS05|J3KS05_HUMAN Chromobox protein homolog 1 (Fragment) OS=Homo sapiens OX=9606 GN=CBX1 PE=1 SV=8;sp|P83916|CBX1_HUMAN Chromobox protein homolog 1 OS=Homo sapiens OX=9606 GN=CBX1 PE=1 SV=1;tr|K7ELA4|K7ELA4_HUMAN Chromobox protein homolog 1 OS=Homo sa	0	657	0	40225000	346	0.0175948	0	627	0	5	4	3	42.8	20.03	173	0	109.9	40225000	9			411
H0Y723;A0A2R8Y8D6;E7EQB9;A0A2R8YEZ4;A0A2R8Y5D3;O15160;D6RDJ3;A0A2R8YEY5	DNA-directed RNA polymerases I and III subunit RPAC1	POLR1C	tr|H0Y723|H0Y723_HUMAN DNA-directed RNA polymerases I and III subunit RPAC1 (Fragment) OS=Homo sapiens OX=9606 GN=POLR1C PE=1 SV=1;tr|A0A2R8Y8D6|A0A2R8Y8D6_HUMAN DNA-directed RNA polymerases I and III subunit RPAC1 OS=Homo sapiens OX=9606 GN=POLR1C PE=1 SV	0	657	0	39540000	347	0.0172952	136350	586	0.00104843	8	4	4	47.9	15.953	140	0	25.582	39677000	6			105
Q13561;F8W1I6;H0YI98;F8VW18;F8VRV7;H0YHL1;F8VX93;F8W0U6	Dynactin subunit 2	DCTN2	sp|Q13561|DCTN2_HUMAN Dynactin subunit 2 OS=Homo sapiens OX=9606 GN=DCTN2 PE=1 SV=4;tr|F8W1I6|F8W1I6_HUMAN Dynactin subunit 2 OS=Homo sapiens OX=9606 GN=DCTN2 PE=1 SV=1;tr|H0YI98|H0YI98_HUMAN Dynactin subunit 2 (Fragment) OS=Homo sapiens OX=9606 GN=DCTN2 P	2141400	164	0.022996	39345000	348	0.0172099	2951000	183	0.022691	8	12	12	47.4	44.23	401	0	156.68	44437000	29			945
F8VR82;F8VYE8;P36873;F8W0W8;A0A087WYY5;E7ETD8;P62140;C9J9S3;C9JP48;F5H1L6;F5H037;F8WE71;H0Y3Y6;F8W1A0	Serine/threonine-protein phosphatase;Serine/threonine-protein phosphatase PP1-gamma catalytic subunit;Serine/threonine-protein phosphatase PP1-beta catalytic subunit	PPP1CC;PPP1CB	tr|F8VR82|F8VR82_HUMAN Serine/threonine-protein phosphatase OS=Homo sapiens OX=9606 GN=PPP1CC PE=1 SV=1;tr|F8VYE8|F8VYE8_HUMAN Serine/threonine-protein phosphatase OS=Homo sapiens OX=9606 GN=PPP1CC PE=1 SV=1;sp|P36873|PP1G_HUMAN Serine/threonine-protein ph	0	657	0	38877000	349	0.0170052	318570	473	0.00244957	14	6	1	35.2	30.987	270	0	81.027	39196000	13			332
Q14444;G3V153;E9PLA9	Caprin-1	CAPRIN1	sp|Q14444|CAPR1_HUMAN Caprin-1 OS=Homo sapiens OX=9606 GN=CAPRIN1 PE=1 SV=2;tr|G3V153|G3V153_HUMAN Caprin-1 OS=Homo sapiens OX=9606 GN=CAPRIN1 PE=1 SV=1;tr|E9PLA9|E9PLA9_HUMAN Caprin-1 (Fragment) OS=Homo sapiens OX=9606 GN=CAPRIN1 PE=1 SV=1	0	657	0	38048000	350	0.0166426	0	627	0	3	7	7	18.2	78.365	709	0	112.96	38048000	14			958
O14617;A0A2R8Y611;A0A2R8Y4J3;K7ELX8;A0A087WYN6	AP-3 complex subunit delta-1	AP3D1	sp|O14617|AP3D1_HUMAN AP-3 complex subunit delta-1 OS=Homo sapiens OX=9606 GN=AP3D1 PE=1 SV=1;tr|A0A2R8Y611|A0A2R8Y611_HUMAN AP-3 complex subunit delta (Fragment) OS=Homo sapiens OX=9606 GN=AP3D1 PE=1 SV=1	0	657	0	37818000	351	0.016542	0	627	0	5	11	11	12.7	130.16	1153	0	74.304	37818000	13			492
Q6IN85;G3V5Z3;H0YIY8;H0YJN6;G3V5A2;Q5MIZ7	Serine/threonine-protein phosphatase 4 regulatory subunit 3A	SMEK1	sp|Q6IN85|P4R3A_HUMAN Serine/threonine-protein phosphatase 4 regulatory subunit 3A OS=Homo sapiens OX=9606 GN=PPP4R3A PE=1 SV=1;tr|G3V5Z3|G3V5Z3_HUMAN Serine/threonine-protein phosphatase 4 regulatory subunit 3A OS=Homo sapiens OX=9606 GN=PPP4R3A PE=1 SV=1	119000	542	0.00127791	37727000	352	0.0165022	207700	540	0.00159706	6	12	12	21.5	95.367	833	0	100.29	38054000	23			1022
lcl|AC_000008.1_prot_AP_000199.1_3	E1B 55K	0	lcl|AC_000008.1_prot_AP_000199.1_3 [protein=E1B 55K] [protein_id=AP_000199.1] [location=2019..3509] [gbkey=CDS]	616530	291	0.00662078	37478000	353	0.0163933	721970	350	0.00555141	1	10	10	29	54.999	496	0	136.26	38817000	16			442
Q9UNF0;A0A0U1RR22;B0QYG7;B0QYG8;H0Y923	Protein kinase C and casein kinase substrate in neurons protein 2	PACSIN2	sp|Q9UNF0|PACN2_HUMAN Protein kinase C and casein kinase substrate in neurons protein 2 OS=Homo sapiens OX=9606 GN=PACSIN2 PE=1 SV=2;tr|A0A0U1RR22|A0A0U1RR22_HUMAN Protein kinase C and casein kinase substrate in neurons protein 2 (Fragment) OS=Homo sapiens	205610	445	0.002208	37310000	354	0.0163198	0	627	0	5	7	7	21	55.738	486	0	103.39	37515000	11			1216
O00743;Q5T1S7	Serine/threonine-protein phosphatase 6 catalytic subunit;Serine/threonine-protein phosphatase 6 catalytic subunit, N-terminally processed	PPP6C	sp|O00743|PPP6_HUMAN Serine/threonine-protein phosphatase 6 catalytic subunit OS=Homo sapiens OX=9606 GN=PPP6C PE=1 SV=1	114800	546	0.00123281	37249000	355	0.0162931	551490	386	0.00424055	2	6	6	24.9	35.144	305	0	84.266	37915000	13			491
Q92973;S4R398;E7EW37;O14787	Transportin-1	TNPO1	sp|Q92973|TNPO1_HUMAN Transportin-1 OS=Homo sapiens OX=9606 GN=TNPO1 PE=1 SV=2	1338600	199	0.0143749	36993000	356	0.0161811	584810	379	0.00449675	4	15	15	24.1	102.35	898	0	125.1	38916000	24			1088
Q5T5C7;P49591	Serine--tRNA ligase, cytoplasmic	SARS	tr|Q5T5C7|Q5T5C7_HUMAN Seryl-tRNA synthetase OS=Homo sapiens OX=9606 GN=SARS1 PE=1 SV=1;sp|P49591|SYSC_HUMAN Serine--tRNA ligase, cytoplasmic OS=Homo sapiens OX=9606 GN=SARS1 PE=1 SV=3	486420	330	0.00522356	36645000	357	0.0160289	312980	474	0.00240658	2	14	14	33.8	61.312	536	0	136.04	37444000	20			786
Q9Y6X4;D6RB01;D6R953;D6RC41;D6RFI5	Soluble lamin-associated protein of 75 kDa	FAM169A	sp|Q9Y6X4|F169A_HUMAN Soluble lamin-associated protein of 75 kDa OS=Homo sapiens OX=9606 GN=FAM169A PE=1 SV=2;tr|D6RB01|D6RB01_HUMAN Soluble lamin-associated protein of 75 kDa OS=Homo sapiens OX=9606 GN=FAM169A PE=1 SV=1	148530	503	0.00159503	35906000	358	0.0157056	0	627	0	5	7	7	21.5	74.954	670	0	94.622	36055000	14			1246
P53004;C9J1E1	Biliverdin reductase A	BLVRA	sp|P53004|BIEA_HUMAN Biliverdin reductase A OS=Homo sapiens OX=9606 GN=BLVRA PE=1 SV=2	140090	512	0.0015044	35312000	359	0.0154458	0	627	0	2	5	5	26.7	33.428	296	0	71.077	35452000	8			812
Q13185;S4R2Y4;C9JMM0;B8ZZ43	Chromobox protein homolog 3	CBX3	sp|Q13185|CBX3_HUMAN Chromobox protein homolog 3 OS=Homo sapiens OX=9606 GN=CBX3 PE=1 SV=4	264870	413	0.00284438	35004000	360	0.0153111	905100	308	0.00695955	4	7	5	52.5	20.811	183	0	107.95	36173000	13			936
P60900;G3V5Z7;G3V295;G3V3I1;G3V3U4;G3V4S5;G3V2S7;H0YJC4	Proteasome subunit alpha type-6;Proteasome subunit alpha type	PSMA6	sp|P60900|PSA6_HUMAN Proteasome subunit alpha type-6 OS=Homo sapiens OX=9606 GN=PSMA6 PE=1 SV=1;tr|G3V5Z7|G3V5Z7_HUMAN Proteasome subunit alpha type OS=Homo sapiens OX=9606 GN=PSMA6 PE=1 SV=1;tr|G3V295|G3V295_HUMAN Proteasome subunit alpha type OS=Homo sap	65243000	25	0.70063	34803000	361	0.0152232	62794000	32	0.482839	8	20	20	80.5	27.399	246	0	323.31	162840000	56			835
P05198;G3V4T5;H0YJS4	Eukaryotic translation initiation factor 2 subunit 1	EIF2S1	sp|P05198|IF2A_HUMAN Eukaryotic translation initiation factor 2 subunit 1 OS=Homo sapiens OX=9606 GN=EIF2S1 PE=1 SV=3;tr|G3V4T5|G3V4T5_HUMAN Eukaryotic translation initiation factor 2 subunit 1 (Fragment) OS=Homo sapiens OX=9606 GN=EIF2S1 PE=1 SV=1;tr|H0YJ	0	657	0	33697000	362	0.0147394	192270	550	0.00147841	3	8	8	35.6	36.112	315	0	51.862	33890000	15			584
P38646;A0A3B3ITI4;D6RA73;D6RJI2;H0YBG6	Stress-70 protein, mitochondrial	HSPA9	sp|P38646|GRP75_HUMAN Stress-70 protein, mitochondrial OS=Homo sapiens OX=9606 GN=HSPA9 PE=1 SV=2	0	657	0	33500000	363	0.0146532	453140	412	0.00348431	5	8	8	18.6	73.68	679	0	66.333	33953000	13			744
Q16543;K7EQA9;K7EL68;K7EIU0;K7EKQ2;K7EJ06	Hsp90 co-chaperone Cdc37;Hsp90 co-chaperone Cdc37, N-terminally processed	CDC37	sp|Q16543|CDC37_HUMAN Hsp90 co-chaperone Cdc37 OS=Homo sapiens OX=9606 GN=CDC37 PE=1 SV=1;tr|K7EQA9|K7EQA9_HUMAN Hsp90 chaperone protein kinase-targeting subunit (Fragment) OS=Homo sapiens OX=9606 GN=CDC37 PE=1 SV=1;tr|K7EL68|K7EL68_HUMAN Hsp90 co-chaperon	0	657	0	33489000	364	0.0146484	650180	368	0.0049994	6	6	6	26.5	44.468	378	0	83.856	34139000	10			991
Q99733;C9JZI7;E9PNW0;E9PJJ2;E9PS34;E9PNJ7;A8MXH2;C9J6D1;H0YCI4;E9PP22;E9PKT8;E9PKI2;C9J1B1	Nucleosome assembly protein 1-like 4	NAP1L4	sp|Q99733|NP1L4_HUMAN Nucleosome assembly protein 1-like 4 OS=Homo sapiens OX=9606 GN=NAP1L4 PE=1 SV=1;tr|C9JZI7|C9JZI7_HUMAN Nucleosome assembly protein 1-like 4 (Fragment) OS=Homo sapiens OX=9606 GN=NAP1L4 PE=1 SV=1;tr|E9PNW0|E9PNW0_HUMAN Nucleosome asse	0	657	0	33381000	365	0.0146012	568380	381	0.00437042	13	8	7	38.7	42.823	375	0	75.638	33950000	19			1122
Q92900	Regulator of nonsense transcripts 1	UPF1	sp|Q92900|RENT1_HUMAN Regulator of nonsense transcripts 1 OS=Homo sapiens OX=9606 GN=UPF1 PE=1 SV=2	1036600	221	0.0111318	33344000	366	0.014585	1034100	294	0.00795146	1	11	11	13.8	124.34	1129	0	78.384	35415000	21			1085
B4DFG0;H0Y993;A0A494C028;P35659;D6RDA2;H0Y8X0;A0A494C198	Protein DEK	DEK	tr|B4DFG0|B4DFG0_HUMAN Protein DEK OS=Homo sapiens OX=9606 GN=DEK PE=1 SV=1;tr|H0Y993|H0Y993_HUMAN DEK oncogene (DNA binding), isoform CRA_b OS=Homo sapiens OX=9606 GN=DEK PE=1 SV=2;tr|A0A494C028|A0A494C028_HUMAN Protein DEK OS=Homo sapiens OX=9606 GN=DEK	0	657	0	33266000	367	0.0145509	285350	491	0.00219413	7	6	6	20.2	39.5	347	0	46.031	33551000	8			135
P20042	Eukaryotic translation initiation factor 2 subunit 2	EIF2S2	sp|P20042|IF2B_HUMAN Eukaryotic translation initiation factor 2 subunit 2 OS=Homo sapiens OX=9606 GN=EIF2S2 PE=1 SV=2	0	657	0	32772000	368	0.0143348	0	627	0	1	4	4	17.4	38.388	333	0	38.489	32772000	6			663
Q15645	Pachytene checkpoint protein 2 homolog	TRIP13	sp|Q15645|PCH2_HUMAN Pachytene checkpoint protein 2 homolog OS=Homo sapiens OX=9606 GN=TRIP13 PE=1 SV=2	119800	540	0.00128651	32558000	369	0.0142412	0	627	0	1	5	5	16.7	48.55	432	0	98.971	32677000	10			982
P07741;H3BQF1;H3BQZ9;H3BQB1;H3BSW3	Adenine phosphoribosyltransferase	APRT	sp|P07741|APT_HUMAN Adenine phosphoribosyltransferase OS=Homo sapiens OX=9606 GN=APRT PE=1 SV=2;tr|H3BQF1|H3BQF1_HUMAN Adenine phosphoribosyltransferase (Fragment) OS=Homo sapiens OX=9606 GN=APRT PE=1 SV=8;tr|H3BQZ9|H3BQZ9_HUMAN Adenine phosphoribosyltrans	1241500	208	0.0133322	32199000	370	0.0140842	656620	367	0.00504892	5	10	10	65.6	19.608	180	0	179.22	34098000	23			597
Q9BUR4;E9PMG4;E9PMR3	Telomerase Cajal body protein 1	WRAP53	sp|Q9BUR4|TCAB1_HUMAN Telomerase Cajal body protein 1 OS=Homo sapiens OX=9606 GN=WRAP53 PE=1 SV=1;tr|E9PMG4|E9PMG4_HUMAN Telomerase Cajal body protein 1 OS=Homo sapiens OX=9606 GN=WRAP53 PE=1 SV=1;tr|E9PMR3|E9PMR3_HUMAN Telomerase Cajal body protein 1 OS=H	0	657	0	32144000	371	0.0140601	139090	584	0.0010695	3	8	8	26.8	59.309	548	0	62.725	32283000	12			1133
Q13148;A0A087WX29;B1AKP7;G3V162;A0A087X260;A0A087WYY0;A0A087WXQ5;A0A087WV68;A0A1W2PNU8;A0A0A0N0M3;A0A087WYE7;A0A087WZC9;A0A087WW61;A0A087WX67;A0A087WXV3;K7EJM5;K7EN94;A0A087WTZ4;K7EL26;A0A087WZM1;K7EJ99;A0A0A0MSV7	TAR DNA-binding protein 43	TARDBP;TDP43	sp|Q13148|TADBP_HUMAN TAR DNA-binding protein 43 OS=Homo sapiens OX=9606 GN=TARDBP PE=1 SV=1;tr|A0A087WX29|A0A087WX29_HUMAN TAR DNA-binding protein 43 (Fragment) OS=Homo sapiens OX=9606 GN=TARDBP PE=1 SV=1;tr|B1AKP7|B1AKP7_HUMAN TAR DNA-binding protein 43	623030	289	0.00669058	31817000	372	0.0139171	642920	369	0.00494358	22	5	5	21.7	44.739	414	0	170.3	33083000	10			932
P24928;A0A6Q8PGB0;A0A6Q8PHB0	DNA-directed RNA polymerase II subunit RPB1	POLR2A	sp|P24928|RPB1_HUMAN DNA-directed RNA polymerase II subunit RPB1 OS=Homo sapiens OX=9606 GN=POLR2A PE=1 SV=2;tr|A0A6Q8PGB0|A0A6Q8PGB0_HUMAN DNA-directed RNA polymerase subunit OS=Homo sapiens OX=9606 GN=POLR2A PE=1 SV=1	361470	353	0.00388175	31658000	373	0.0138475	832070	319	0.006398	3	17	17	13.8	217.17	1970	0	207.84	32852000	26			685
P19367;B1AR62;Q2TB90	Hexokinase-1	HK1	sp|P19367|HXK1_HUMAN Hexokinase-1 OS=Homo sapiens OX=9606 GN=HK1 PE=1 SV=3	0	657	0	31543000	374	0.0137972	0	627	0	3	11	11	16.1	102.48	917	0	175.9	31543000	15			658
Q9H9Y6;H7C0D9	DNA-directed RNA polymerase I subunit RPA2	POLR1B	sp|Q9H9Y6|RPA2_HUMAN DNA-directed RNA polymerase I subunit RPA2 OS=Homo sapiens OX=9606 GN=POLR1B PE=1 SV=2	0	657	0	31331000	375	0.0137045	0	627	0	2	9	9	11.8	128.23	1135	0	72.762	31331000	12			1158
P61081;M0QYI6	NEDD8-conjugating enzyme Ubc12	UBE2M	sp|P61081|UBC12_HUMAN NEDD8-conjugating enzyme Ubc12 OS=Homo sapiens OX=9606 GN=UBE2M PE=1 SV=1	94962	571	0.00101978	31135000	376	0.0136188	145230	580	0.00111671	2	5	5	27.3	20.9	183	0	37.215	31375000	8			837
P25786;F5GX11;B4DEV8	Proteasome subunit alpha type-1	PSMA1	sp|P25786|PSA1_HUMAN Proteasome subunit alpha type-1 OS=Homo sapiens OX=9606 GN=PSMA1 PE=1 SV=1;tr|F5GX11|F5GX11_HUMAN Proteasome subunit alpha type-1 OS=Homo sapiens OX=9606 GN=PSMA1 PE=1 SV=1	57684000	31	0.619456	30820000	377	0.013481	75597000	28	0.581285	3	21	21	81.4	29.555	263	0	323.31	164100000	82			691
C9JLI6;H0YMV8;Q71UM5;P42677	40S ribosomal protein S27;40S ribosomal protein S27-like	RPS27L;RPS27	tr|C9JLI6|C9JLI6_HUMAN 40S ribosomal protein S27 OS=Homo sapiens OX=9606 GN=RPS27L PE=1 SV=1;tr|H0YMV8|H0YMV8_HUMAN 40S ribosomal protein S27 OS=Homo sapiens OX=9606 GN=RPS27L PE=1 SV=1;sp|Q71UM5|RS27L_HUMAN 40S ribosomal protein S27-like OS=Homo sapiens O	0	657	0	30744000	378	0.0134477	0	627	0	4	2	2	24.7	10.886	97	0	13.591	30744000	2			229
F2Z3A6;F8W8C2;Q9HBM0	Vezatin	VEZT	tr|F2Z3A6|F2Z3A6_HUMAN Vezatin OS=Homo sapiens OX=9606 GN=VEZT PE=1 SV=2;tr|F8W8C2|F8W8C2_HUMAN Vezatin (Fragment) OS=Homo sapiens OX=9606 GN=VEZT PE=1 SV=1;sp|Q9HBM0|VEZA_HUMAN Vezatin OS=Homo sapiens OX=9606 GN=VEZT PE=1 SV=3	0	657	0	30721000	379	0.0134377	0	627	0	3	1	1	2.2	52.863	460	0.0091896	6.2423	30721000	1			314
O60884;A0A087WT48	DnaJ homolog subfamily A member 2	DNAJA2	sp|O60884|DNJA2_HUMAN DnaJ homolog subfamily A member 2 OS=Homo sapiens OX=9606 GN=DNAJA2 PE=1 SV=1	50147	637	0.000538517	30652000	380	0.0134075	206350	541	0.00158668	2	6	6	31.1	45.745	412	0	131.75	30909000	19			538
B9ZVN9;O95602	DNA-directed RNA polymerase;DNA-directed RNA polymerase I subunit RPA1	POLR1A	tr|B9ZVN9|B9ZVN9_HUMAN DNA-directed RNA polymerase subunit OS=Homo sapiens OX=9606 GN=POLR1A PE=1 SV=1;sp|O95602|RPA1_HUMAN DNA-directed RNA polymerase I subunit RPA1 OS=Homo sapiens OX=9606 GN=POLR1A PE=1 SV=2	0	657	0	30615000	381	0.0133913	0	627	0	2	11	11	11.8	187.81	1659	0	66.802	30615000	14			211
O43815	Striatin	STRN	sp|O43815|STRN_HUMAN Striatin OS=Homo sapiens OX=9606 GN=STRN PE=1 SV=4	117860	544	0.00126567	30433000	382	0.0133117	0	627	0	1	9	8	19.1	86.131	780	0	230.66	30551000	19			518
P07737;K7EJ44;I3L3D5;CON__P02584	Profilin-1	PFN1	sp|P07737|PROF1_HUMAN Profilin-1 OS=Homo sapiens OX=9606 GN=PFN1 PE=1 SV=2;tr|K7EJ44|K7EJ44_HUMAN Profilin OS=Homo sapiens OX=9606 GN=PFN1 PE=1 SV=1;tr|I3L3D5|I3L3D5_HUMAN Profilin (Fragment) OS=Homo sapiens OX=9606 GN=PFN1 PE=1 SV=1	604810	297	0.00649492	30335000	383	0.0132688	397270	426	0.00305471	4	6	6	59.3	15.054	140	0	75.599	31337000	12			596
P47897;A0A1B0GVU9;B4DDN1;H7C0R3;A0A0U1RQX5;C9J165;A0A0U1RQT0;A0A0U1RRC8;A0A0U1RQM8;A0A0U1RQU2;A0A0U1RRI9;A0A0U1RQE9;A0A0U1RQL2;A0A0U1RQX9;F2Z2V6;A0A0U1RRJ7;A0A0U1RR79;A0A0U1RQJ6;A0A1B0GTT3;A0A0U1RR66;A0A0U1RQQ5	Glutamine--tRNA ligase	QARS	sp|P47897|SYQ_HUMAN Glutamine--tRNA ligase OS=Homo sapiens OX=9606 GN=QARS1 PE=1 SV=1;tr|A0A1B0GVU9|A0A1B0GVU9_HUMAN Glutaminyl-tRNA synthetase (Fragment) OS=Homo sapiens OX=9606 GN=QARS1 PE=1 SV=1;tr|B4DDN1|B4DDN1_HUMAN Glutaminyl-tRNA synthetase OS=Homo	182570	462	0.00196058	30317000	384	0.013261	512750	397	0.00394267	21	13	13	23.4	87.798	775	0	112.19	31012000	18			775
P60510;H3BTA2;H3BV22;I3L4X0;E5RFI3;E5RHP4;E7ESG8	Serine/threonine-protein phosphatase 4 catalytic subunit;Serine/threonine-protein phosphatase	PPP4C	sp|P60510|PP4C_HUMAN Serine/threonine-protein phosphatase 4 catalytic subunit OS=Homo sapiens OX=9606 GN=PPP4C PE=1 SV=1;tr|H3BTA2|H3BTA2_HUMAN Serine/threonine-protein phosphatase (Fragment) OS=Homo sapiens OX=9606 GN=PPP4C PE=1 SV=1;tr|H3BV22|H3BV22_HUMA	0	657	0	30101000	385	0.0131665	0	627	0	7	6	4	25.1	35.08	307	0	37.643	30101000	6			831
P56545	C-terminal-binding protein 2	CTBP2	sp|P56545|CTBP2_HUMAN C-terminal-binding protein 2 OS=Homo sapiens OX=9606 GN=CTBP2 PE=1 SV=1	0	657	0	30090000	386	0.0131617	0	627	0	1	4	3	13.3	48.944	445	0	24.427	30090000	5			828
P46781;B5MCT8;C9JM19;F2Z3C0;A8MXK4	40S ribosomal protein S9	RPS9	sp|P46781|RS9_HUMAN 40S ribosomal protein S9 OS=Homo sapiens OX=9606 GN=RPS9 PE=1 SV=3;tr|B5MCT8|B5MCT8_HUMAN 40S ribosomal protein S9 OS=Homo sapiens OX=9606 GN=RPS9 PE=1 SV=1;tr|C9JM19|C9JM19_HUMAN 40S ribosomal protein S9 OS=Homo sapiens OX=9606 GN=RPS9	167670	480	0.00180057	30078000	387	0.0131564	0	627	0	5	4	4	18.6	22.591	194	0	23.504	30246000	5			769
A0A087X0X3;P52272;M0R019;M0QYQ7;M0R2T0;M0QZM1;M0R2I7;M0R0N3;M0QY96;M0R0Y6	Heterogeneous nuclear ribonucleoprotein M	HNRNPM	tr|A0A087X0X3|A0A087X0X3_HUMAN Heterogeneous nuclear ribonucleoprotein M OS=Homo sapiens OX=9606 GN=HNRNPM PE=1 SV=1;sp|P52272|HNRPM_HUMAN Heterogeneous nuclear ribonucleoprotein M OS=Homo sapiens OX=9606 GN=HNRNPM PE=1 SV=3;tr|M0R019|M0R019_HUMAN Heteroge	596870	299	0.00640965	29730000	388	0.0130042	1006000	296	0.00773539	10	9	9	19.5	77.569	730	0	59.892	31332000	14			41
P49915	GMP synthase [glutamine-hydrolyzing]	GMPS	sp|P49915|GUAA_HUMAN GMP synthase [glutamine-hydrolyzing] OS=Homo sapiens OX=9606 GN=GMPS PE=1 SV=1	117820	545	0.00126524	29726000	389	0.0130024	0	627	0	1	10	10	22.9	76.715	693	0	70.721	29844000	14			791
P13807;M0QYU1	Glycogen [starch] synthase, muscle	GYS1	sp|P13807|GYS1_HUMAN Glycogen [starch] synthase, muscle OS=Homo sapiens OX=9606 GN=GYS1 PE=1 SV=2	212230	438	0.00227909	29598000	390	0.0129465	129830	591	0.000998296	2	6	6	11.5	83.785	737	0	46.923	29940000	9			637
P14868;C9J7S3;C9JLC1;H7C278;C9JQM9;H7BZ35	Aspartate--tRNA ligase, cytoplasmic	DARS	sp|P14868|SYDC_HUMAN Aspartate--tRNA ligase, cytoplasmic OS=Homo sapiens OX=9606 GN=DARS1 PE=1 SV=2	794100	260	0.00852766	29456000	391	0.0128843	914610	305	0.00703267	6	12	12	32.3	57.136	501	0	130.43	31165000	21			645
Q15424;Q14151;K7ES42	Scaffold attachment factor B1	SAFB	sp|Q15424|SAFB1_HUMAN Scaffold attachment factor B1 OS=Homo sapiens OX=9606 GN=SAFB PE=1 SV=4	189490	459	0.00203489	29408000	392	0.0128634	292080	486	0.00224588	3	5	5	9.2	102.64	915	0	48.93	29890000	10			978
Q96QK1;I3L4S0;A0A1W2PP10;A0A3B3ITD4	Vacuolar protein sorting-associated protein 35	VPS35	sp|Q96QK1|VPS35_HUMAN Vacuolar protein sorting-associated protein 35 OS=Homo sapiens OX=9606 GN=VPS35 PE=1 SV=2	513200	324	0.00551114	29246000	393	0.0127925	286610	490	0.00220382	4	13	13	20.7	91.706	796	0	131.66	30046000	15			1109
P13804;H0YLU7;H0YK49;H0YNX6;H0YL12;H0YKF0;H0YL83;J3KN60	Electron transfer flavoprotein subunit alpha, mitochondrial	ETFA	sp|P13804|ETFA_HUMAN Electron transfer flavoprotein subunit alpha, mitochondrial OS=Homo sapiens OX=9606 GN=ETFA PE=1 SV=1;tr|H0YLU7|H0YLU7_HUMAN Electron transfer flavoprotein subunit alpha, mitochondrial (Fragment) OS=Homo sapiens OX=9606 GN=ETFA PE=1 SV	264820	414	0.00284384	29234000	394	0.0127872	330660	462	0.00254253	8	8	8	32.7	35.079	333	0	69.628	29829000	13			636
O95197	Reticulon-3	RTN3	sp|O95197|RTN3_HUMAN Reticulon-3 OS=Homo sapiens OX=9606 GN=RTN3 PE=1 SV=2	581690	306	0.00624664	29171000	395	0.0127597	0	627	0	1	1	1	1.1	112.61	1032	0.0027933	7.3929	29752000	3			564
P19387;H3BRR2	DNA-directed RNA polymerase II subunit RPB3	POLR2C	sp|P19387|RPB3_HUMAN DNA-directed RNA polymerase II subunit RPB3 OS=Homo sapiens OX=9606 GN=POLR2C PE=1 SV=2	152820	502	0.0016411	29050000	396	0.0127068	0	627	0	2	6	6	38.9	31.441	275	0	72.986	29202000	11			659
A0A087X253;P63010;A0A087WYD1;A0A087WU93;A0A087WZQ6;K7EJ01;H7C034	AP-2 complex subunit beta	AP2B1	tr|A0A087X253|A0A087X253_HUMAN AP complex subunit beta OS=Homo sapiens OX=9606 GN=AP2B1 PE=1 SV=1;sp|P63010|AP2B1_HUMAN AP-2 complex subunit beta OS=Homo sapiens OX=9606 GN=AP2B1 PE=1 SV=1;tr|A0A087WYD1|A0A087WYD1_HUMAN AP-2 complex subunit beta (Fragment)	0	657	0	28731000	397	0.0125672	0	627	0	7	12	7	20.2	101.33	913	0	90.344	28731000	15			43
Q9UBF2	Coatomer subunit gamma-2	COPG2	sp|Q9UBF2|COPG2_HUMAN Coatomer subunit gamma-2 OS=Homo sapiens OX=9606 GN=COPG2 PE=1 SV=1	48900	640	0.000525126	28720000	398	0.0125624	128540	592	0.000988377	1	15	11	27.2	97.621	871	0	100.9	28897000	19			1190
Q14137;A0A075B729	Ribosome biogenesis protein BOP1	BOP1	sp|Q14137|BOP1_HUMAN Ribosome biogenesis protein BOP1 OS=Homo sapiens OX=9606 GN=BOP1 PE=1 SV=2	0	657	0	28703000	399	0.012555	0	627	0	2	9	9	21.4	83.629	746	0	63.461	28703000	9			953
P08559;Q5JPU0;Q5JPU1;Q5JPU3;Q5JPU2;Q5JPT9	Pyruvate dehydrogenase E1 component subunit alpha, somatic form, mitochondrial	PDHA1	sp|P08559|ODPA_HUMAN Pyruvate dehydrogenase E1 component subunit alpha, somatic form, mitochondrial OS=Homo sapiens OX=9606 GN=PDHA1 PE=1 SV=3	0	657	0	28650000	400	0.0125318	180630	559	0.00138891	6	5	5	21.8	43.295	390	0	35.8	28831000	6			602
M0QXB4;O14579;M0R061	Coatomer subunit epsilon	COPE	tr|M0QXB4|M0QXB4_HUMAN Coatomer subunit epsilon OS=Homo sapiens OX=9606 GN=COPE PE=1 SV=1;sp|O14579|COPE_HUMAN Coatomer subunit epsilon OS=Homo sapiens OX=9606 GN=COPE PE=1 SV=3;tr|M0R061|M0R061_HUMAN Coatomer subunit epsilon OS=Homo sapiens OX=9606 GN=COP	709910	274	0.00762356	28273000	401	0.0123669	1124800	282	0.00864888	3	5	5	22.7	36.923	331	0	58.401	30108000	14			464
B5MCF9;O00541;B3KXD6;H7C267	Pescadillo homolog	PES1	tr|B5MCF9|B5MCF9_HUMAN Pescadillo homolog OS=Homo sapiens OX=9606 GN=PES1 PE=1 SV=1;sp|O00541|PESC_HUMAN Pescadillo homolog OS=Homo sapiens OX=9606 GN=PES1 PE=1 SV=1;tr|B3KXD6|B3KXD6_HUMAN Pescadillo homolog OS=Homo sapiens OX=9606 GN=PES1 PE=1 SV=1	0	657	0	28214000	402	0.0123411	0	627	0	4	8	8	20	66.077	571	0	58.743	28214000	10			196
Q3ZCQ8;M0R0C3;M0R2F8;M0R047;M0R003	Mitochondrial import inner membrane translocase subunit TIM50	TIMM50	sp|Q3ZCQ8|TIM50_HUMAN Mitochondrial import inner membrane translocase subunit TIM50 OS=Homo sapiens OX=9606 GN=TIMM50 PE=1 SV=2;tr|M0R0C3|M0R0C3_HUMAN Mitochondrial import inner membrane translocase subunit TIM50 (Fragment) OS=Homo sapiens OX=9606 GN=TIMM5	0	657	0	28119000	403	0.0122995	0	627	0	5	3	3	12.2	39.646	353	0	39.716	28119000	9			998
Q96K76	Ubiquitin carboxyl-terminal hydrolase 47	USP47	sp|Q96K76|UBP47_HUMAN Ubiquitin carboxyl-terminal hydrolase 47 OS=Homo sapiens OX=9606 GN=USP47 PE=1 SV=3	194410	456	0.00208773	28046000	404	0.0122676	399870	425	0.0030747	1	17	17	15	157.31	1375	0	124.49	28640000	20			1104
Q8WY54	Protein phosphatase 1E	PPM1E	sp|Q8WY54|PPM1E_HUMAN Protein phosphatase 1E OS=Homo sapiens OX=9606 GN=PPM1E PE=1 SV=3	0	657	0	28040000	405	0.012265	0	627	0	1	5	5	9.9	83.951	755	0	37.935	28040000	5			1077
P19623;K7ESL0;K7EQ47;K7EL89;K7EKM4	Spermidine synthase	SRM	sp|P19623|SPEE_HUMAN Spermidine synthase OS=Homo sapiens OX=9606 GN=SRM PE=1 SV=1	166830	483	0.00179155	28038000	406	0.0122641	845400	315	0.0065005	5	7	7	41.4	33.824	302	0	46.47	29050000	11			661
P49366;A0A087WZK0;Q5J8M5;M0R264;M0R253;M0QX43;A0A3B3IU31;M0R1T2;B4E3M2;M0R0J4;M0QYZ7;M0R1T4;M0R0V2	Deoxyhypusine synthase	DHPS	sp|P49366|DHYS_HUMAN Deoxyhypusine synthase OS=Homo sapiens OX=9606 GN=DHPS PE=1 SV=1;tr|A0A087WZK0|A0A087WZK0_HUMAN Deoxyhypusine synthase OS=Homo sapiens OX=9606 GN=DHPS PE=1 SV=1;tr|Q5J8M5|Q5J8M5_HUMAN Deoxyhypusine synthase OS=Homo sapiens OX=9606 GN=D	167670	480	0.00180057	27846000	407	0.0121801	237760	531	0.0018282	13	7	7	33.9	40.97	369	0	86.68	28251000	12			783
Q9UNE7;H3BS86;H3BTA3;H3BUD0	E3 ubiquitin-protein ligase CHIP	STUB1	sp|Q9UNE7|CHIP_HUMAN E3 ubiquitin-protein ligase CHIP OS=Homo sapiens OX=9606 GN=STUB1 PE=1 SV=2;tr|H3BS86|H3BS86_HUMAN E3 ubiquitin-protein ligase CHIP (Fragment) OS=Homo sapiens OX=9606 GN=STUB1 PE=1 SV=8;tr|H3BTA3|H3BTA3_HUMAN E3 ubiquitin-protein ligas	223520	432	0.00240033	27660000	408	0.0120988	324720	468	0.00249686	4	7	7	27.1	34.856	303	0	61.264	28208000	10			1215
CON__P13645;P13645;CON__Q7Z3Y7;CON__P02535-1;Q7Z3Y7;CON__Q7Z3Z0;CON__Q7Z3Y8;CON__Q148H6;Q7Z3Z0;Q7Z3Y8	Keratin, type I cytoskeletal 10	KRT10	;sp|P13645|K1C10_HUMAN Keratin, type I cytoskeletal 10 OS=Homo sapiens OX=9606 GN=KRT10 PE=1 SV=6	18653000	55	0.20031	27606000	409	0.0120751	7252000	116	0.0557625	10	17	16	38.4	59.51	593	0	261.99	53512000	42		+	239
P38117;M0QY67	Electron transfer flavoprotein subunit beta	ETFB	sp|P38117|ETFB_HUMAN Electron transfer flavoprotein subunit beta OS=Homo sapiens OX=9606 GN=ETFB PE=1 SV=3;tr|M0QY67|M0QY67_HUMAN Electron transfer flavoprotein subunit beta (Fragment) OS=Homo sapiens OX=9606 GN=ETFB PE=1 SV=1	0	657	0	27131000	410	0.0118674	309880	478	0.00238275	2	6	6	28.6	27.843	255	0	67.816	27440000	8			742
P49411	Elongation factor Tu, mitochondrial	TUFM	sp|P49411|EFTU_HUMAN Elongation factor Tu, mitochondrial OS=Homo sapiens OX=9606 GN=TUFM PE=1 SV=2	321590	382	0.00345348	27124000	411	0.0118643	683870	361	0.00525845	1	5	5	14.8	49.541	452	0	102.27	28130000	10			785
P11177;C9J634;F8WF02	Pyruvate dehydrogenase E1 component subunit beta, mitochondrial	PDHB	sp|P11177|ODPB_HUMAN Pyruvate dehydrogenase E1 component subunit beta, mitochondrial OS=Homo sapiens OX=9606 GN=PDHB PE=1 SV=3	0	657	0	27110000	412	0.0118582	732040	347	0.00562884	3	7	7	24.8	39.233	359	0	95.527	27842000	14			620
P62266;D6RD47	40S ribosomal protein S23	RPS23	sp|P62266|RS23_HUMAN 40S ribosomal protein S23 OS=Homo sapiens OX=9606 GN=RPS23 PE=1 SV=3;tr|D6RD47|D6RD47_HUMAN 40S ribosomal protein S23 OS=Homo sapiens OX=9606 GN=RPS23 PE=1 SV=1	915030	238	0.0098263	27087000	413	0.0118481	980270	297	0.00753755	2	2	2	26.6	15.807	143	0	18.695	28982000	5			856
Q5JSL0;Q5JSK6;P82970;Q5JSK9;Q5JSK7;Q5JSK8	High mobility group nucleosome-binding domain-containing protein 5	HMGN5	tr|Q5JSL0|Q5JSL0_HUMAN High mobility group nucleosome-binding domain-containing protein 5 (Fragment) OS=Homo sapiens OX=9606 GN=HMGN5 PE=1 SV=1;tr|Q5JSK6|Q5JSK6_HUMAN High mobility group nucleosome-binding domain-containing protein 5 (Fragment) OS=Homo sap	0	657	0	27009000	414	0.011814	0	627	0	6	5	5	50.7	16.496	148	0	119.25	27009000	7			893
E7EM64;Q7L5N1;H7C3T0	COP9 signalosome complex subunit 6	COPS6	tr|E7EM64|E7EM64_HUMAN COP9 signalosome complex subunit 6 OS=Homo sapiens OX=9606 GN=COPS6 PE=1 SV=1;sp|Q7L5N1|CSN6_HUMAN COP9 signalosome complex subunit 6 OS=Homo sapiens OX=9606 GN=COPS6 PE=1 SV=1	2205500	162	0.0236844	26913000	415	0.011772	1972500	219	0.0151671	3	9	9	36.2	36.064	326	0	93.745	31091000	20			266
P39748;I3L3E9;F5H1Y3	Flap endonuclease 1	FEN1	sp|P39748|FEN1_HUMAN Flap endonuclease 1 OS=Homo sapiens OX=9606 GN=FEN1 PE=1 SV=1	0	657	0	26906000	416	0.011769	324870	467	0.00249801	3	7	7	30	42.592	380	0	41.875	27231000	11			747
P43246;A0A2R8YFH0;E9PHA6;A0A2R8Y6P0;A0A2R8YG02;A0A2R8Y7S8	DNA mismatch repair protein Msh2	MSH2	sp|P43246|MSH2_HUMAN DNA mismatch repair protein Msh2 OS=Homo sapiens OX=9606 GN=MSH2 PE=1 SV=1;tr|A0A2R8YFH0|A0A2R8YFH0_HUMAN DNA mismatch repair protein OS=Homo sapiens OX=9606 GN=MSH2 PE=1 SV=1;tr|E9PHA6|E9PHA6_HUMAN DNA mismatch repair protein OS=Homo	389010	345	0.00417749	26731000	417	0.0116924	356110	451	0.00273822	6	10	10	16.4	104.74	934	0	73.34	27477000	22			760
Q8TD19;G3V459	Serine/threonine-protein kinase Nek9	NEK9	sp|Q8TD19|NEK9_HUMAN Serine/threonine-protein kinase Nek9 OS=Homo sapiens OX=9606 GN=NEK9 PE=1 SV=2	455620	334	0.0048928	26652000	418	0.0116579	0	627	0	2	5	5	7.4	107.17	979	0	58.63	27107000	7			1070
Q5TEC6;A0A590UJL8;K7EMV3;K7EP01;A0A590UJJ6;B4DEB1;K7ES00;Q6NXT2;Q16695	Histone H3;Histone H3.3C;Histone H3.1t	HIST2H3PS2;H3F3B;H3F3A;H3F3C;HIST3H3	sp|Q5TEC6|H3PS2_HUMAN Histone HIST2H3PS2 OS=Homo sapiens OX=9606 GN=H3-2 PE=1 SV=1;tr|A0A590UJL8|A0A590UJL8_HUMAN Histone HIST2H3PS2 (Fragment) OS=Homo sapiens OX=9606 GN=H3-2 PE=1 SV=1;tr|K7EMV3|K7EMV3_HUMAN Histone H3 OS=Homo sapiens OX=9606 GN=H3-3B PE=	0	657	0	26581000	419	0.0116268	0	627	0	9	2	1	13.2	15.43	136	0.005305	6.6148	26581000	1			1016
A0A024RA52;P25787;C9JCK5;H3BT36;H7C402	Proteasome subunit alpha type;Proteasome subunit alpha type-2	PSMA2	tr|A0A024RA52|A0A024RA52_HUMAN Proteasome subunit alpha type OS=Homo sapiens OX=9606 GN=PSMA2 PE=1 SV=1;sp|P25787|PSA2_HUMAN Proteasome subunit alpha type-2 OS=Homo sapiens OX=9606 GN=PSMA2 PE=1 SV=2;tr|C9JCK5|C9JCK5_HUMAN Proteasome subunit alpha type-2 O	57191000	32	0.614161	26194000	420	0.0114575	63883000	31	0.491213	5	14	14	60.7	25.898	234	0	319.88	147270000	67			2
Q13033;G3V340;G3V3G7;M0QXN2;M0R2A7;M0QYS2	Striatin-3	STRN3	sp|Q13033|STRN3_HUMAN Striatin-3 OS=Homo sapiens OX=9606 GN=STRN3 PE=1 SV=3	126680	529	0.00136039	25850000	421	0.011307	0	627	0	6	7	6	13.2	87.208	797	0	56.032	25976000	11			928
P10809;E7EXB4;E7ESH4;C9JL25;C9JL19;C9JCQ4;C9J0S9	60 kDa heat shock protein, mitochondrial	HSPD1	sp|P10809|CH60_HUMAN 60 kDa heat shock protein, mitochondrial OS=Homo sapiens OX=9606 GN=HSPD1 PE=1 SV=2	1276300	205	0.0137059	25570000	422	0.0111846	5258500	136	0.040434	7	18	18	42.4	61.054	573	0	175.96	32105000	36			615
Q9UBF1	Melanoma-associated antigen C2	MAGEC2	sp|Q9UBF1|MAGC2_HUMAN Melanoma-associated antigen C2 OS=Homo sapiens OX=9606 GN=MAGEC2 PE=1 SV=1	0	657	0	25563000	423	0.0111815	98166	608	0.000754824	1	1	1	2.7	41.162	373	0.0010267	11.614	25661000	2			1189
P52655;J3KNC0	Transcription initiation factor IIA subunit 1;Transcription initiation factor IIA alpha chain;Transcription initiation factor IIA beta chain	GTF2A1	sp|P52655|TF2AA_HUMAN Transcription initiation factor IIA subunit 1 OS=Homo sapiens OX=9606 GN=GTF2A1 PE=1 SV=1;tr|J3KNC0|J3KNC0_HUMAN Transcription initiation factor IIA subunit 1 OS=Homo sapiens OX=9606 GN=GTF2A1 PE=1 SV=1	0	657	0	25476000	424	0.0111435	0	627	0	2	3	3	18.9	41.513	376	0	35.725	25476000	6			807
P28072;A0A087X2I4;I3L3X7	Proteasome subunit beta type-6	PSMB6	sp|P28072|PSB6_HUMAN Proteasome subunit beta type-6 OS=Homo sapiens OX=9606 GN=PSMB6 PE=1 SV=4	26982000	46	0.289754	25235000	425	0.011038	31480000	49	0.242058	3	10	10	69.9	25.357	239	0	163.82	83698000	36			705
P24821;J3QSU6;F5H7V9;E9PC84;H0YGZ3	Tenascin	TNC	sp|P24821|TENA_HUMAN Tenascin OS=Homo sapiens OX=9606 GN=TNC PE=1 SV=3;tr|J3QSU6|J3QSU6_HUMAN Tenascin OS=Homo sapiens OX=9606 GN=TNC PE=1 SV=1;tr|F5H7V9|F5H7V9_HUMAN Tenascin OS=Homo sapiens OX=9606 GN=TNC PE=1 SV=1;tr|E9PC84|E9PC84_HUMAN Tenascin OS=Homo	949250	235	0.0101938	25171000	426	0.01101	775480	332	0.00596287	5	15	15	12.4	240.85	2201	0	115.28	26896000	26			684
P12268;H0Y4R1;E7ETK5	Inosine-5-monophosphate dehydrogenase 2	IMPDH2	sp|P12268|IMDH2_HUMAN Inosine-5-monophosphate dehydrogenase 2 OS=Homo sapiens OX=9606 GN=IMPDH2 PE=1 SV=2;tr|H0Y4R1|H0Y4R1_HUMAN Inosine-5-monophosphate dehydrogenase 2 (Fragment) OS=Homo sapiens OX=9606 GN=IMPDH2 PE=1 SV=1;tr|E7ETK5|E7ETK5_HUMAN Inosine	123850	535	0.00133	25165000	427	0.0110074	369010	441	0.00283741	3	9	9	33.7	55.804	514	0	95.123	25658000	20			625
Q9Y3U8;J3QSB5;J3KTD3	60S ribosomal protein L36	RPL36	sp|Q9Y3U8|RL36_HUMAN 60S ribosomal protein L36 OS=Homo sapiens OX=9606 GN=RPL36 PE=1 SV=3;tr|J3QSB5|J3QSB5_HUMAN 60S ribosomal protein L36 OS=Homo sapiens OX=9606 GN=RPL36 PE=1 SV=1;tr|J3KTD3|J3KTD3_HUMAN 60S ribosomal protein L36 (Fragment) OS=Homo sapien	1375600	195	0.0147723	25110000	428	0.0109834	681500	362	0.00524023	3	4	4	31.4	12.254	105	0	32.275	27167000	8			1236
S4R3H4;E7EQT4;Q9UKV3;G3V3B0	Apoptotic chromatin condensation inducer in the nucleus	ACIN1	tr|S4R3H4|S4R3H4_HUMAN Apoptotic chromatin condensation inducer in the nucleus OS=Homo sapiens OX=9606 GN=ACIN1 PE=1 SV=1;tr|E7EQT4|E7EQT4_HUMAN Apoptotic chromatin condensation inducer in the nucleus OS=Homo sapiens OX=9606 GN=ACIN1 PE=1 SV=2;sp|Q9UKV3|AC	0	657	0	24770000	429	0.0108346	360320	446	0.00277059	4	8	8	8.8	145.44	1283	0	98.47	25130000	12			1262
Q13838;Q5STU3;A0A0G2JJZ9;F6WLT2;A0A140T9X3;A0A0A0MT12;F6TRA5;A0A140T9X9;F6S4E6;F6UJC5;A0A140TA18;H0Y400;A0A140T996;A0A0G2JHN7;F6U6E2;F6S2B7;A0A140T973;F6SXL5;A0A140T9K1;H0YCC6;F6QYI9;A0A0G2JJL7;F6R6M7;A0A140T9L4	Spliceosome RNA helicase DDX39B	DDX39B	sp|Q13838|DX39B_HUMAN Spliceosome RNA helicase DDX39B OS=Homo sapiens OX=9606 GN=DDX39B PE=1 SV=1;tr|Q5STU3|Q5STU3_HUMAN RNA helicase OS=Homo sapiens OX=9606 GN=DDX39B PE=1 SV=2;tr|A0A0G2JJZ9|A0A0G2JJZ9_HUMAN Spliceosome RNA helicase DDX39B (Fragment) OS=H	511560	325	0.00549353	24691000	430	0.0108001	605370	374	0.00465485	24	16	6	47.9	48.991	428	0	63.139	25808000	17			948
P50225;H3BRY5;P50226;H3BQX5;E9PKR8;E9PKW4;E9PM76;A0A0A6YYL2;P0DMN0;P0DMM9;H3BNY7	Sulfotransferase 1A1;Sulfotransferase;Sulfotransferase 1A2	SULT1A1;SULT1A2	sp|P50225|ST1A1_HUMAN Sulfotransferase 1A1 OS=Homo sapiens OX=9606 GN=SULT1A1 PE=1 SV=3;tr|H3BRY5|H3BRY5_HUMAN Sulfotransferase (Fragment) OS=Homo sapiens OX=9606 GN=SULT1A1 PE=1 SV=1;sp|P50226|ST1A2_HUMAN Sulfotransferase 1A2 OS=Homo sapiens OX=9606 GN=SU	257760	416	0.00276803	24688000	431	0.0107988	406190	422	0.0031233	11	7	7	36.9	34.165	295	0	60.217	25352000	15			792
Q96T76;H0Y746;H7C1W5;Q5T454;H0Y7V3;F8WCH8;B0QZ77	MMS19 nucleotide excision repair protein homolog	MMS19	sp|Q96T76|MMS19_HUMAN MMS19 nucleotide excision repair protein homolog OS=Homo sapiens OX=9606 GN=MMS19 PE=1 SV=2;tr|H0Y746|H0Y746_HUMAN MMS19 nucleotide excision repair protein (Fragment) OS=Homo sapiens OX=9606 GN=MMS19 PE=1 SV=1	0	657	0	24600000	432	0.0107603	0	627	0	7	8	8	12.1	113.29	1030	0	49.956	24600000	8			1115
Q8IYD1	Eukaryotic peptide chain release factor GTP-binding subunit ERF3B	GSPT2	sp|Q8IYD1|ERF3B_HUMAN Eukaryotic peptide chain release factor GTP-binding subunit ERF3B OS=Homo sapiens OX=9606 GN=GSPT2 PE=1 SV=2	0	657	0	24564000	433	0.0107445	380160	436	0.00292315	1	8	2	18.8	68.882	628	0	11.715	24944000	4			1053
B2WTI3;B2WTI4;K7EJU9;Q6NYC1	Bifunctional arginine demethylase and lysyl-hydroxylase JMJD6	JMJD6	tr|B2WTI3|B2WTI3_HUMAN Bifunctional arginine demethylase and lysyl-hydroxylase JMJD6 OS=Homo sapiens OX=9606 GN=JMJD6 PE=1 SV=1;tr|B2WTI4|B2WTI4_HUMAN Bifunctional arginine demethylase and lysyl-hydroxylase JMJD6 OS=Homo sapiens OX=9606 GN=JMJD6 PE=1 SV=1;	84581	584	0.000908296	24406000	434	0.0106754	0	627	0	4	5	5	18.8	39.241	335	0	33.11	24490000	10			188
O94992	Protein HEXIM1	HEXIM1	sp|O94992|HEXI1_HUMAN Protein HEXIM1 OS=Homo sapiens OX=9606 GN=HEXIM1 PE=1 SV=1	0	657	0	24047000	435	0.0105184	0	627	0	1	2	2	8.6	40.623	359	0	78.848	24047000	3			563
Q15717;M0QZR9;A0A494C0Q5;A0A494C0M6;A0A494C011;A0A494C173;B1AM48;A0A494C015;A0A494C1D9;A0A494C0F8;B1APY9;A0A494C147;A0A0A0MRX1;A0A0R4J2E6;Q12926;P26378	ELAV-like protein 1	ELAVL1	sp|Q15717|ELAV1_HUMAN ELAV-like protein 1 OS=Homo sapiens OX=9606 GN=ELAVL1 PE=1 SV=2	245160	422	0.00263272	24039000	436	0.0105149	278830	493	0.002144	16	5	5	20.2	36.091	326	0	75.017	24563000	10			985
P63167;F8VXI7;F8VXL2;F8VRV5;Q96FJ2	Dynein light chain 1, cytoplasmic;Dynein light chain 2, cytoplasmic	DYNLL1;DYNLL2	sp|P63167|DYL1_HUMAN Dynein light chain 1, cytoplasmic OS=Homo sapiens OX=9606 GN=DYNLL1 PE=1 SV=1;tr|F8VXI7|F8VXI7_HUMAN Dynein light chain (Fragment) OS=Homo sapiens OX=9606 GN=DYNLL1 PE=1 SV=1;tr|F8VXL2|F8VXL2_HUMAN Dynein light chain OS=Homo sapiens OX	135220	518	0.0014521	24032000	437	0.0105118	308500	481	0.00237214	5	2	2	37.1	10.366	89	0	26.499	24476000	6			875
P68431	Histone H3.1	HIST1H3A	sp|P68431|H31_HUMAN Histone H3.1 OS=Homo sapiens OX=9606 GN=H3C1 PE=1 SV=2	0	657	0	23950000	438	0.010476	0	627	0	1	2	1	28.7	15.404	136	0.0028355	7.7576	23950000	6			890
Q9NSD9	Phenylalanine--tRNA ligase beta subunit	FARSB	sp|Q9NSD9|SYFB_HUMAN Phenylalanine--tRNA ligase beta subunit OS=Homo sapiens OX=9606 GN=FARSB PE=1 SV=3	246080	421	0.0026426	23854000	439	0.010434	382270	434	0.00293937	1	9	9	19.4	66.115	589	0	59.958	24482000	11			1173
Q9Y4E8;H0YI26;Q13107	Ubiquitin carboxyl-terminal hydrolase 15	USP15	sp|Q9Y4E8|UBP15_HUMAN Ubiquitin carboxyl-terminal hydrolase 15 OS=Homo sapiens OX=9606 GN=USP15 PE=1 SV=3	328490	375	0.00352758	23805000	440	0.0104125	0	627	0	3	10	9	17.6	112.42	981	0	73.027	24134000	13			1239
M0R0F0;P46782;M0QZN2;M0R0R2	40S ribosomal protein S5;40S ribosomal protein S5, N-terminally processed	RPS5	tr|M0R0F0|M0R0F0_HUMAN 40S ribosomal protein S5 (Fragment) OS=Homo sapiens OX=9606 GN=RPS5 PE=1 SV=1;sp|P46782|RS5_HUMAN 40S ribosomal protein S5 OS=Homo sapiens OX=9606 GN=RPS5 PE=1 SV=4;tr|M0QZN2|M0QZN2_HUMAN 40S ribosomal protein S5 OS=Homo sapiens OX=9	334850	369	0.00359588	23773000	441	0.0103985	337210	460	0.00259289	4	4	4	25.5	22.391	200	0	42.64	24445000	6			471
Q8N543;A0A0A0MTR2;H3BUA6;H3BR79	Prolyl 3-hydroxylase OGFOD1	OGFOD1	sp|Q8N543|OGFD1_HUMAN Prolyl 3-hydroxylase OGFOD1 OS=Homo sapiens OX=9606 GN=OGFOD1 PE=1 SV=1;tr|A0A0A0MTR2|A0A0A0MTR2_HUMAN Prolyl 3-hydroxylase OGFOD1 OS=Homo sapiens OX=9606 GN=OGFOD1 PE=1 SV=1	0	657	0	23707000	442	0.0103697	0	627	0	4	5	5	14.9	63.245	542	0	35.607	23707000	6			1061
O75717;C9JYB3	WD repeat and HMG-box DNA-binding protein 1	WDHD1	sp|O75717|WDHD1_HUMAN WD repeat and HMG-box DNA-binding protein 1 OS=Homo sapiens OX=9606 GN=WDHD1 PE=1 SV=1	0	657	0	23472000	443	0.0102669	0	627	0	2	5	5	7.1	125.97	1129	0	46.786	23472000	6			550
C9JTS3;C9JG97;C9JEH3;Q13685	Angio-associated migratory cell protein	AAMP	tr|C9JTS3|C9JTS3_HUMAN Angio-associated migratory cell protein (Fragment) OS=Homo sapiens OX=9606 GN=AAMP PE=1 SV=8;tr|C9JG97|C9JG97_HUMAN Angio-associated migratory cell protein OS=Homo sapiens OX=9606 GN=AAMP PE=1 SV=1;tr|C9JEH3|C9JEH3_HUMAN Angio-associ	0	657	0	22896000	444	0.0100149	0	627	0	4	2	2	17.5	21.992	200	0	14.954	22896000	5			223
P09936;D6RE83;D6R956;D6R974	Ubiquitin carboxyl-terminal hydrolase isozyme L1;Ubiquitin carboxyl-terminal hydrolase	UCHL1	sp|P09936|UCHL1_HUMAN Ubiquitin carboxyl-terminal hydrolase isozyme L1 OS=Homo sapiens OX=9606 GN=UCHL1 PE=1 SV=2;tr|D6RE83|D6RE83_HUMAN Ubiquitin carboxyl-terminal hydrolase OS=Homo sapiens OX=9606 GN=UCHL1 PE=1 SV=1;tr|D6R956|D6R956_HUMAN Ubiquitin carbo	0	657	0	22513000	445	0.00984741	0	627	0	4	3	3	19.3	24.824	223	0	53.344	22513000	4			609
C9JP16;O75718	Cartilage-associated protein	CRTAP	tr|C9JP16|C9JP16_HUMAN Cartilage-associated protein OS=Homo sapiens OX=9606 GN=CRTAP PE=1 SV=1;sp|O75718|CRTAP_HUMAN Cartilage-associated protein OS=Homo sapiens OX=9606 GN=CRTAP PE=1 SV=1	0	657	0	22459000	446	0.00982379	0	627	0	2	5	5	16.8	41.432	358	0	31.224	22459000	7			232
P52209;K7EM49;K7EPF6;K7EMN2;K7ELN9	6-phosphogluconate dehydrogenase, decarboxylating	PGD	sp|P52209|6PGD_HUMAN 6-phosphogluconate dehydrogenase, decarboxylating OS=Homo sapiens OX=9606 GN=PGD PE=1 SV=3;tr|K7EM49|K7EM49_HUMAN Phosphogluconate dehydrogenase (NADP(+)-dependent, decarboxylating) (Fragment) OS=Homo sapiens OX=9606 GN=PGD PE=1 SV=1;t	145390	505	0.00156131	22192000	447	0.009707	201380	545	0.00154846	5	6	6	22.4	53.139	483	0	41.101	22539000	14			803
Q15738;C9JDR0	Sterol-4-alpha-carboxylate 3-dehydrogenase, decarboxylating	NSDHL	sp|Q15738|NSDHL_HUMAN Sterol-4-alpha-carboxylate 3-dehydrogenase, decarboxylating OS=Homo sapiens OX=9606 GN=NSDHL PE=1 SV=2;tr|C9JDR0|C9JDR0_HUMAN Sterol-4-alpha-carboxylate 3-dehydrogenase, decarboxylating (Fragment) OS=Homo sapiens OX=9606 GN=NSDHL PE=1	0	657	0	22159000	448	0.00969257	0	627	0	2	6	6	29.5	41.9	373	0	36.449	22159000	7			986
O00154;K7EKP8	Cytosolic acyl coenzyme A thioester hydrolase	ACOT7	sp|O00154|BACH_HUMAN Cytosolic acyl coenzyme A thioester hydrolase OS=Homo sapiens OX=9606 GN=ACOT7 PE=1 SV=3;tr|K7EKP8|K7EKP8_HUMAN Cytosolic acyl coenzyme A thioester hydrolase (Fragment) OS=Homo sapiens OX=9606 GN=ACOT7 PE=1 SV=8	0	657	0	22137000	449	0.00968294	753070	337	0.00579055	2	4	4	15.8	41.796	380	0	46	22890000	9			478
Q9UN86;D6RAC7;D6RB17;D6RBM9;D6REX8;D6RBR0;D6RE13;D6RBW8;D6RGJ4;E5RH00;D6R9X5;D6R9A4	Ras GTPase-activating protein-binding protein 2	G3BP2	sp|Q9UN86|G3BP2_HUMAN Ras GTPase-activating protein-binding protein 2 OS=Homo sapiens OX=9606 GN=G3BP2 PE=1 SV=2;tr|D6RAC7|D6RAC7_HUMAN Ras GTPase-activating protein-binding protein 2 (Fragment) OS=Homo sapiens OX=9606 GN=G3BP2 PE=1 SV=1;tr|D6RB17|D6RB17_H	0	657	0	21861000	450	0.00956222	0	627	0	12	4	3	13.7	54.12	482	0	25.773	21861000	8			1214
P62906	60S ribosomal protein L10a	RPL10A	sp|P62906|RL10A_HUMAN 60S ribosomal protein L10a OS=Homo sapiens OX=9606 GN=RPL10A PE=1 SV=2	894960	244	0.00961077	21696000	451	0.00949005	902680	309	0.00694094	1	3	3	18.9	24.831	217	0	42.559	23494000	13			869
Q96DI7;Q9NSS8	U5 small nuclear ribonucleoprotein 40 kDa protein	SNRNP40;DKFZp434D199	sp|Q96DI7|SNR40_HUMAN U5 small nuclear ribonucleoprotein 40 kDa protein OS=Homo sapiens OX=9606 GN=SNRNP40 PE=1 SV=1;tr|Q9NSS8|Q9NSS8_HUMAN U5 small nuclear ribonucleoprotein 40 kDa protein OS=Homo sapiens OX=9606 GN=SNRNP40 PE=1 SV=1	0	657	0	21665000	452	0.00947649	0	627	0	2	6	6	37.3	39.31	357	0	36.913	21665000	8			1098
I3L0N3;P46459;I3L2G1;K7EQD6	Vesicle-fusing ATPase	NSF	tr|I3L0N3|I3L0N3_HUMAN Vesicle-fusing ATPase OS=Homo sapiens OX=9606 GN=NSF PE=1 SV=1;sp|P46459|NSF_HUMAN Vesicle-fusing ATPase OS=Homo sapiens OX=9606 GN=NSF PE=1 SV=3	143590	509	0.00154198	21643000	453	0.00946686	0	627	0	4	8	8	13.8	82.091	739	0	49.524	21786000	8			400
P37108;H0YLA2	Signal recognition particle 14 kDa protein	SRP14	sp|P37108|SRP14_HUMAN Signal recognition particle 14 kDa protein OS=Homo sapiens OX=9606 GN=SRP14 PE=1 SV=2;tr|H0YLA2|H0YLA2_HUMAN Signal recognition particle 14 kDa protein OS=Homo sapiens OX=9606 GN=SRP14 PE=1 SV=1	171540	473	0.00184213	21546000	454	0.00942443	337510	459	0.0025952	2	3	3	25	14.57	136	0	57.444	22055000	7			740
Q9UNS2;C9JLV5;H7C3P9;J3QKR0;J3KTQ1;J3QL22;J3QS85;K7ES36	COP9 signalosome complex subunit 3	COPS3	sp|Q9UNS2|CSN3_HUMAN COP9 signalosome complex subunit 3 OS=Homo sapiens OX=9606 GN=COPS3 PE=1 SV=3;tr|C9JLV5|C9JLV5_HUMAN COP9 signalosome complex subunit 3 (Fragment) OS=Homo sapiens OX=9606 GN=COPS3 PE=1 SV=8;tr|H7C3P9|H7C3P9_HUMAN COP9 signalosome compl	1912000	173	0.0205325	21274000	455	0.00930546	3799900	156	0.0292184	8	10	10	42.1	47.873	423	0	204.55	26986000	29			1219
P20700;E9PBF6;A0A0D9SFE5;A0A0D9SFY5	Lamin-B1	LMNB1	sp|P20700|LMNB1_HUMAN Lamin-B1 OS=Homo sapiens OX=9606 GN=LMNB1 PE=1 SV=2;tr|E9PBF6|E9PBF6_HUMAN Lamin-B1 OS=Homo sapiens OX=9606 GN=LMNB1 PE=1 SV=1;tr|A0A0D9SFE5|A0A0D9SFE5_HUMAN Lamin B1, isoform CRA_a OS=Homo sapiens OX=9606 GN=LMNB1 PE=1 SV=1	2186500	163	0.0234803	21078000	456	0.00921973	783200	330	0.00602223	4	13	13	31.2	66.408	586	0	300.87	24047000	20			666
P26373;J3QSB4;H3BTH3	60S ribosomal protein L13	RPL13	sp|P26373|RL13_HUMAN 60S ribosomal protein L13 OS=Homo sapiens OX=9606 GN=RPL13 PE=1 SV=4;tr|J3QSB4|J3QSB4_HUMAN 60S ribosomal protein L13 (Fragment) OS=Homo sapiens OX=9606 GN=RPL13 PE=1 SV=1	897030	243	0.009633	20771000	457	0.00908544	1120000	284	0.00861197	3	7	7	28	24.261	211	0	42.3	22788000	10			693
A0A087WTP3;Q92945;M0R0I5;M0QYH3;M0QXW7;M0R3J3;E9PEB5;Q96AE4	Far upstream element-binding protein 2	KHSRP	tr|A0A087WTP3|A0A087WTP3_HUMAN Far upstream element-binding protein 2 OS=Homo sapiens OX=9606 GN=KHSRP PE=1 SV=1;sp|Q92945|FUBP2_HUMAN Far upstream element-binding protein 2 OS=Homo sapiens OX=9606 GN=KHSRP PE=1 SV=4;tr|M0R0I5|M0R0I5_HUMAN Far upstream ele	1022600	224	0.0109815	20714000	458	0.00906051	1756800	226	0.0135085	8	8	8	16.7	73.027	711	0	77.864	23494000	16			9
Q01658	Protein Dr1	DR1	sp|Q01658|NC2B_HUMAN Protein Dr1 OS=Homo sapiens OX=9606 GN=DR1 PE=1 SV=1	0	657	0	20678000	459	0.00904476	0	627	0	1	3	3	34.7	19.443	176	0	20.563	20678000	3			899
P10768;X6RA14;U3KQT1;H7BZT7	S-formylglutathione hydrolase	ESD	sp|P10768|ESTD_HUMAN S-formylglutathione hydrolase OS=Homo sapiens OX=9606 GN=ESD PE=1 SV=2;tr|X6RA14|X6RA14_HUMAN S-formylglutathione hydrolase OS=Homo sapiens OX=9606 GN=ESD PE=1 SV=1;tr|U3KQT1|U3KQT1_HUMAN S-formylglutathione hydrolase OS=Homo sapiens O	0	657	0	20566000	460	0.00899577	745420	342	0.00573173	4	7	7	42.6	31.462	282	0	50.051	21311000	14			614
Q9HAV4;E2QRM3	Exportin-5	XPO5	sp|Q9HAV4|XPO5_HUMAN Exportin-5 OS=Homo sapiens OX=9606 GN=XPO5 PE=1 SV=1	0	657	0	20517000	461	0.00897434	0	627	0	2	6	6	6.5	136.31	1204	0	171.16	20517000	11			1160
Q14112;A0A087WZP6;H0YJV3	Nidogen-2	NID2	sp|Q14112|NID2_HUMAN Nidogen-2 OS=Homo sapiens OX=9606 GN=NID2 PE=1 SV=3;tr|A0A087WZP6|A0A087WZP6_HUMAN Nidogen-2 OS=Homo sapiens OX=9606 GN=NID2 PE=1 SV=1;tr|H0YJV3|H0YJV3_HUMAN Nidogen-2 (Fragment) OS=Homo sapiens OX=9606 GN=NID2 PE=1 SV=1	295690	392	0.00317535	20489000	462	0.00896209	102660	606	0.000789379	3	10	9	12.7	151.25	1375	0	76.195	20888000	17			951
Q96ST2;A0A1B0GW95;B8ZZB6	Protein IWS1 homolog	IWS1	sp|Q96ST2|IWS1_HUMAN Protein IWS1 homolog OS=Homo sapiens OX=9606 GN=IWS1 PE=1 SV=2	0	657	0	20003000	463	0.00874951	0	627	0	3	6	6	10	91.954	819	0	83.981	20003000	10			1112
Q8N4Q1	Mitochondrial intermembrane space import and assembly protein 40	CHCHD4	sp|Q8N4Q1|MIA40_HUMAN Mitochondrial intermembrane space import and assembly protein 40 OS=Homo sapiens OX=9606 GN=CHCHD4 PE=1 SV=1	0	657	0	19942000	464	0.00872283	0	627	0	1	4	4	45.8	15.996	142	0	27.576	19942000	6			1060
E9PGT6;Q99627;H7C3S9	COP9 signalosome complex subunit 8	COPS8	tr|E9PGT6|E9PGT6_HUMAN COP9 signalosome complex subunit 8 OS=Homo sapiens OX=9606 GN=COPS8 PE=1 SV=1;sp|Q99627|CSN8_HUMAN COP9 signalosome complex subunit 8 OS=Homo sapiens OX=9606 GN=COPS8 PE=1 SV=1;tr|H7C3S9|H7C3S9_HUMAN COP9 signalosome complex subunit	2779800	149	0.0298516	19906000	465	0.00870708	1922600	220	0.0147834	3	6	6	74	19.344	173	0	76.973	24608000	16			290
A0A494C1K3;P78347;A0A494C0Q7	General transcription factor II-I	GTF2I	tr|A0A494C1K3|A0A494C1K3_HUMAN General transcription factor II-I OS=Homo sapiens OX=9606 GN=GTF2I PE=1 SV=1;sp|P78347|GTF2I_HUMAN General transcription factor II-I OS=Homo sapiens OX=9606 GN=GTF2I PE=1 SV=2	309770	387	0.00332655	19896000	466	0.00870271	118830	597	0.000913714	3	9	9	11.7	131.05	1159	0	61.584	20325000	12			139
E9PLK3;P55786;A6NEC2;H0YDG0;H0YCQ5;E9PJ74;E9PRQ5	Puromycin-sensitive aminopeptidase	NPEPPS	tr|E9PLK3|E9PLK3_HUMAN Aminopeptidase OS=Homo sapiens OX=9606 GN=NPEPPS PE=1 SV=1;sp|P55786|PSA_HUMAN Puromycin-sensitive aminopeptidase OS=Homo sapiens OX=9606 GN=NPEPPS PE=1 SV=2	239650	425	0.00257355	19878000	467	0.00869484	0	627	0	7	8	8	12.5	102.99	915	0	63.986	20117000	11			303
G3XAI2;P07942;E7EPA6	Laminin subunit beta-1	LAMB1	tr|G3XAI2|G3XAI2_HUMAN Laminin subunit beta-1 OS=Homo sapiens OX=9606 GN=LAMB1 PE=1 SV=1;sp|P07942|LAMB1_HUMAN Laminin subunit beta-1 OS=Homo sapiens OX=9606 GN=LAMB1 PE=1 SV=2;tr|E7EPA6|E7EPA6_HUMAN Laminin subunit beta-1 OS=Homo sapiens OX=9606 GN=LAMB1	944570	236	0.0101435	19824000	468	0.00867121	800630	326	0.00615625	3	11	11	10.2	200.48	1810	0	77.048	21569000	28			355
P46778;G3V1B3;M0R181	60S ribosomal protein L21	RPL21	sp|P46778|RL21_HUMAN 60S ribosomal protein L21 OS=Homo sapiens OX=9606 GN=RPL21 PE=1 SV=2	0	657	0	19678000	469	0.00860735	0	627	0	3	3	3	25	18.565	160	0	24.807	19678000	4			768
D6RFM5;P31040;A0A494C1T6;A0A087X1I3;H0Y8X1	Succinate dehydrogenase [ubiquinone] flavoprotein subunit, mitochondrial	SDHA	tr|D6RFM5|D6RFM5_HUMAN Succinate dehydrogenase [ubiquinone] flavoprotein subunit, mitochondrial OS=Homo sapiens OX=9606 GN=SDHA PE=1 SV=1;sp|P31040|SDHA_HUMAN Succinate dehydrogenase [ubiquinone] flavoprotein subunit, mitochondrial OS=Homo sapiens OX=9606	154690	495	0.00166118	19565000	470	0.00855793	541580	389	0.00416435	5	5	5	16.3	63.566	583	0	82.221	20261000	12			255
A0A6Q8PGB5;A0A6Q8PGE8;A0A6Q8PF33;A0A6Q8PFY2;A0A6Q8PGN5;H3BPK7;P49588;A0A6Q8PGR9;A0A6Q8PH44;A0A6Q8PFK3;A0A6Q8PHJ2;A0A6Q8PHP7;A0A6Q8PGI8;A0A6Q8PG62;A0A6Q8PG28;A0A6Q8PF77;A0A6Q8PHP3	Alanine--tRNA ligase, cytoplasmic	AARS	tr|A0A6Q8PGB5|A0A6Q8PGB5_HUMAN Alanine--tRNA ligase OS=Homo sapiens OX=9606 GN=AARS1 PE=1 SV=1;tr|A0A6Q8PGE8|A0A6Q8PGE8_HUMAN Alanine--tRNA ligase OS=Homo sapiens OX=9606 GN=AARS1 PE=1 SV=1;tr|A0A6Q8PF33|A0A6Q8PF33_HUMAN Alanine--tRNA ligase OS=Homo sapien	0	657	0	19561000	471	0.00855618	270990	500	0.00208371	17	7	7	13.7	102.42	925	0	63.588	19832000	11			155
O00264;U3KQM0;O15173	Membrane-associated progesterone receptor component 1	PGRMC1	sp|O00264|PGRC1_HUMAN Membrane-associated progesterone receptor component 1 OS=Homo sapiens OX=9606 GN=PGRMC1 PE=1 SV=3	226570	430	0.00243308	19500000	472	0.00852949	327140	464	0.00251546	3	3	3	27.7	21.671	195	0	23.006	20054000	9			482
O43491;E9PK52;E9PHY5;E9PII3;A0A2R8Y5B3;Q6R5J7;Q6ZSX4;E9PMV8;H0Y5B0;E9PJP4;E9PPC9;E9PQN0;E9PRG1;E9PIG0;E9PQD2;E9PMG5;E9PN54	Band 4.1-like protein 2	EPB41L2	sp|O43491|E41L2_HUMAN Band 4.1-like protein 2 OS=Homo sapiens OX=9606 GN=EPB41L2 PE=1 SV=1;tr|E9PK52|E9PK52_HUMAN Band 4.1-like protein 2 OS=Homo sapiens OX=9606 GN=EPB41L2 PE=1 SV=1;tr|E9PHY5|E9PHY5_HUMAN Band 4.1-like protein 2 OS=Homo sapiens OX=9606 GN	320480	383	0.00344156	19341000	473	0.00845995	386140	433	0.00296913	17	8	7	13.7	112.59	1005	0	57.389	20048000	11			513
lcl|AC_000008.1_prot_AP_000198.1_2	E1B 19K	#N/A	lcl|AC_000008.1_prot_AP_000198.1_2 [protein=E1B 19K] [protein_id=AP_000198.1] [location=1714..2244] [gbkey=CDS]	446270	335	0.00479239	19259000	474	0.00842408	526290	394	0.00404678	1	5	5	46	20.614	176	0	106.45	20232000	14			441
M0QXL5;P22087;M0R299;M0R2Q4;M0R0P1;M0R2U2;M0R1H0;M0R2B0	rRNA 2-O-methyltransferase fibrillarin	FBL	tr|M0QXL5|M0QXL5_HUMAN rRNA 2-O-methyltransferase fibrillarin (Fragment) OS=Homo sapiens OX=9606 GN=FBL PE=1 SV=1;sp|P22087|FBRL_HUMAN rRNA 2-O-methyltransferase fibrillarin OS=Homo sapiens OX=9606 GN=FBL PE=1 SV=2;tr|M0R299|M0R299_HUMAN rRNA 2-O-methyl	457010	333	0.00490773	19147000	475	0.00837509	1264900	265	0.00972614	8	6	6	48.8	26.639	244	0	40.584	20869000	16			465
A0A087WUT6;O60841	Eukaryotic translation initiation factor 5B	EIF5B	tr|A0A087WUT6|A0A087WUT6_HUMAN Eukaryotic translation initiation factor 5B OS=Homo sapiens OX=9606 GN=EIF5B PE=1 SV=1;sp|O60841|IF2P_HUMAN Eukaryotic translation initiation factor 5B OS=Homo sapiens OX=9606 GN=EIF5B PE=1 SV=4	0	657	0	19099000	476	0.00835409	0	627	0	2	5	5	8.9	138.68	1220	0	30.549	19099000	9			22
P09211;A8MX94;A0A2R8Y5E5;A0A087X243;A0A087X2E9	Glutathione S-transferase P	GSTP1	sp|P09211|GSTP1_HUMAN Glutathione S-transferase P OS=Homo sapiens OX=9606 GN=GSTP1 PE=1 SV=2;tr|A8MX94|A8MX94_HUMAN GST class-pi OS=Homo sapiens OX=9606 GN=GSTP1 PE=1 SV=1	89717	577	0.000963451	18927000	477	0.00827886	506550	398	0.00389499	5	3	3	22.4	23.356	210	0	79.7	19523000	7			604
A0A0D9SF54;A0A0D9SFF6;A0A5F9ZHC3;A0A0D9SFH4;A0A1B0GV13;A0A1B0GTB7;A0A1B0GUH3		SPTAN1	tr|A0A0D9SF54|A0A0D9SF54_HUMAN Spectrin alpha chain, non-erythrocytic 1 OS=Homo sapiens OX=9606 GN=SPTAN1 PE=1 SV=1	88534	579	0.000950747	18834000	478	0.00823818	0	627	0	7	206	1	79.6	282.83	2457	0	16.083	18922000	3			75
E9PPJ0;Q13435;E9PJT3;E9PJ04;H0YCG1;H0YEX5	Splicing factor 3B subunit 2	SF3B2	tr|E9PPJ0|E9PPJ0_HUMAN Splicing factor 3B subunit 2 OS=Homo sapiens OX=9606 GN=SF3B2 PE=1 SV=1;sp|Q13435|SF3B2_HUMAN Splicing factor 3B subunit 2 OS=Homo sapiens OX=9606 GN=SF3B2 PE=1 SV=2;tr|E9PJT3|E9PJT3_HUMAN Splicing factor 3B subunit 2 (Fragment) OS=H	0	657	0	18833000	479	0.00823774	750450	339	0.0057704	6	7	7	9.9	98.169	878	0	120.24	19584000	10			308
Q9Y2T2;H0YBM0;E5RJ52;P53677	AP-3 complex subunit mu-1	AP3M1	sp|Q9Y2T2|AP3M1_HUMAN AP-3 complex subunit mu-1 OS=Homo sapiens OX=9606 GN=AP3M1 PE=1 SV=1	0	657	0	18831000	480	0.00823687	0	627	0	4	5	5	18.2	46.939	418	0	34.962	18831000	8			1228
Q9BZQ8;H0Y7M9	Protein Niban	FAM129A	sp|Q9BZQ8|NIBA1_HUMAN Protein Niban 1 OS=Homo sapiens OX=9606 GN=NIBAN1 PE=1 SV=1	248550	419	0.00266912	18807000	481	0.00822637	458920	408	0.00352875	2	8	8	11.9	103.13	928	0	179.62	19515000	14			1144
Q92769;E5RH52;E5RG37;H3BM24;E5RFI6;E5RJ04;E5RGV4;E5RHE7;E5RFP9	Histone deacetylase 2	HDAC2	sp|Q92769|HDAC2_HUMAN Histone deacetylase 2 OS=Homo sapiens OX=9606 GN=HDAC2 PE=1 SV=2	0	657	0	18585000	482	0.00812926	526610	393	0.00404924	9	7	4	23	55.364	488	0	63.998	19111000	6			1083
P12236	ADP/ATP translocase 3;ADP/ATP translocase 3, N-terminally processed	SLC25A6	sp|P12236|ADT3_HUMAN ADP/ATP translocase 3 OS=Homo sapiens OX=9606 GN=SLC25A6 PE=1 SV=4	53768	635	0.000577402	18558000	483	0.00811745	322850	469	0.00248248	1	5	1	15.1	32.866	298	0	97.846	18935000	10			624
A0A2R8Y6G6;P06733;K7EM90;A0A2R8Y879;A0A2R8YEM5	Alpha-enolase	ENO1	tr|A0A2R8Y6G6|A0A2R8Y6G6_HUMAN 2-phospho-D-glycerate hydro-lyase OS=Homo sapiens OX=9606 GN=ENO1 PE=1 SV=1;sp|P06733|ENOA_HUMAN Alpha-enolase OS=Homo sapiens OX=9606 GN=ENO1 PE=1 SV=2	99035	564	0.00106351	18522000	484	0.00810171	440800	413	0.00338942	5	6	6	23.5	47.327	434	0	167.75	19062000	13			108
Q9BS26	Endoplasmic reticulum resident protein 44	ERP44	sp|Q9BS26|ERP44_HUMAN Endoplasmic reticulum resident protein 44 OS=Homo sapiens OX=9606 GN=ERP44 PE=1 SV=1	0	657	0	18334000	485	0.00801947	188200	555	0.00144712	1	3	3	11.6	46.971	406	0	24.698	18523000	4			1129
P04350;M0R278;M0QY85;M0R0X0;M0QY37;M0QX14;M0QZL7;M0R1I1	Tubulin beta-4A chain	TUBB4A	sp|P04350|TBB4A_HUMAN Tubulin beta-4A chain OS=Homo sapiens OX=9606 GN=TUBB4A PE=1 SV=2	0	657	0	18278000	486	0.00799498	245900	525	0.00189079	8	29	2	73.4	49.585	444	0	119.94	18524000	8			580
P23526	Adenosylhomocysteinase	AHCY	sp|P23526|SAHH_HUMAN Adenosylhomocysteinase OS=Homo sapiens OX=9606 GN=AHCY PE=1 SV=4	528880	322	0.00567952	18270000	487	0.00799148	1661900	237	0.0127788	1	9	9	22.9	47.716	432	0	67.587	20461000	16			681
P13489;E9PMJ3;E9PLZ3;E9PIM9;E9PIK5;E9PMN0;E9PMA9;E9PR82;E9PMI1;H0YCR7	Ribonuclease inhibitor	RNH1	sp|P13489|RINI_HUMAN Ribonuclease inhibitor OS=Homo sapiens OX=9606 GN=RNH1 PE=1 SV=2;tr|E9PMJ3|E9PMJ3_HUMAN Ribonuclease inhibitor (Fragment) OS=Homo sapiens OX=9606 GN=RNH1 PE=1 SV=1;tr|E9PLZ3|E9PLZ3_HUMAN Ribonuclease inhibitor (Fragment) OS=Homo sapien	0	657	0	18263000	488	0.00798842	249100	523	0.00191539	10	6	6	25.2	49.973	461	0	38.07	18512000	11			632
P30153;C9J9C1;B3KQV6	Serine/threonine-protein phosphatase 2A 65 kDa regulatory subunit A alpha isoform	PPP2R1A	sp|P30153|2AAA_HUMAN Serine/threonine-protein phosphatase 2A 65 kDa regulatory subunit A alpha isoform OS=Homo sapiens OX=9606 GN=PPP2R1A PE=1 SV=4;tr|C9J9C1|C9J9C1_HUMAN Serine/threonine-protein phosphatase 2A 65 kDa regulatory subunit A alpha isoform (Fr	268140	410	0.0028795	18103000	489	0.00791843	0	627	0	3	4	4	9.7	65.308	589	0	29.312	18372000	5			712
P62851	40S ribosomal protein S25	RPS25	sp|P62851|RS25_HUMAN 40S ribosomal protein S25 OS=Homo sapiens OX=9606 GN=RPS25 PE=1 SV=1	329010	374	0.00353316	18043000	490	0.00789219	0	627	0	1	1	1	7.2	13.742	125	0.0060976	6.472	18372000	2			865
P07196	Neurofilament light polypeptide	NEFL	sp|P07196|NFL_HUMAN Neurofilament light polypeptide OS=Homo sapiens OX=9606 GN=NEFL PE=1 SV=3	0	657	0	17849000	491	0.00780733	0	627	0	1	9	8	21	61.516	543	0	84.143	17849000	12			593
Q99436;Q5TBG5	Proteasome subunit beta type-7	PSMB7	sp|Q99436|PSB7_HUMAN Proteasome subunit beta type-7 OS=Homo sapiens OX=9606 GN=PSMB7 PE=1 SV=1	4720200	120	0.0506892	17608000	492	0.00770191	7833300	110	0.0602323	2	13	13	67.1	29.965	277	0	323.31	30162000	41			1116
P51570;K7ERJ9;K7EII7	Galactokinase	GALK1	sp|P51570|GALK1_HUMAN Galactokinase OS=Homo sapiens OX=9606 GN=GALK1 PE=1 SV=1	233300	427	0.00250536	17401000	493	0.00761137	353970	455	0.00272177	3	4	4	12	42.272	392	0	37.054	17988000	9			797
A8MUM1;Q53HC9;F8WDS8;C9J0U9;D3YTH5;F8WDX0;F8WB12;C9JVR6	Protein TSSC1	TSSC1	tr|A8MUM1|A8MUM1_HUMAN EARP and GARP complex-interacting protein 1 OS=Homo sapiens OX=9606 GN=EIPR1 PE=1 SV=2;sp|Q53HC9|EIPR1_HUMAN EARP and GARP complex-interacting protein 1 OS=Homo sapiens OX=9606 GN=EIPR1 PE=1 SV=2;tr|F8WDS8|F8WDS8_HUMAN EARP and GARP	0	657	0	17209000	494	0.00752739	0	627	0	8	3	3	11.1	46.319	414	0	21.384	17209000	3			179
A0A087WUK2;O14979	Heterogeneous nuclear ribonucleoprotein D-like	HNRNPDL	tr|A0A087WUK2|A0A087WUK2_HUMAN Heterogeneous nuclear ribonucleoprotein D-like OS=Homo sapiens OX=9606 GN=HNRNPDL PE=1 SV=1;sp|O14979|HNRDL_HUMAN Heterogeneous nuclear ribonucleoprotein D-like OS=Homo sapiens OX=9606 GN=HNRNPDL PE=1 SV=3	0	657	0	17125000	495	0.00749065	90916	610	0.000699077	2	7	6	22	40.04	363	0	40.655	17216000	5			18
P42285;H0YAC4	Superkiller viralicidic activity 2-like 2	SKIV2L2	sp|P42285|MTREX_HUMAN Exosome RNA helicase MTR4 OS=Homo sapiens OX=9606 GN=MTREX PE=1 SV=3	209930	442	0.00225439	17076000	496	0.00746921	170010	567	0.00130725	2	8	8	10.5	117.8	1042	0	52.786	17456000	12			758
A0A0B4J1W3;Q9BXJ9;Q6N069	N-alpha-acetyltransferase 15, NatA auxiliary subunit	NAA15	tr|A0A0B4J1W3|A0A0B4J1W3_HUMAN N-alpha-acetyltransferase 15, NatA auxiliary subunit OS=Homo sapiens OX=9606 GN=NAA15 PE=1 SV=1;sp|Q9BXJ9|NAA15_HUMAN N-alpha-acetyltransferase 15, NatA auxiliary subunit OS=Homo sapiens OX=9606 GN=NAA15 PE=1 SV=1	58034	629	0.000623214	17013000	497	0.00744166	139600	583	0.00107342	3	10	10	13.4	101.2	865	0	79.286	17211000	11			61
P26639;B7ZLP8;A2RTX5	Threonine--tRNA ligase, cytoplasmic	TARS	sp|P26639|SYTC_HUMAN Threonine--tRNA ligase 1, cytoplasmic OS=Homo sapiens OX=9606 GN=TARS1 PE=1 SV=3	125270	532	0.00134525	16939000	498	0.00740929	266010	506	0.00204542	3	6	6	11.2	83.434	723	0	42.095	17330000	11			694
P49720;A0A087WXQ8;A0A087WY10;A0A087WUL2	Proteasome subunit beta type-3	PSMB3	sp|P49720|PSB3_HUMAN Proteasome subunit beta type-3 OS=Homo sapiens OX=9606 GN=PSMB3 PE=1 SV=2;tr|A0A087WXQ8|A0A087WXQ8_HUMAN Proteasome chain 13 OS=Homo sapiens OX=9606 GN=PSMB3 PE=1 SV=1;tr|A0A087WY10|A0A087WY10_HUMAN Proteasome chain 13 OS=Homo sapiens	28480000	44	0.30584	16906000	499	0.00739485	20142000	64	0.154877	4	13	13	51.2	22.949	205	0	274.86	65528000	45			787
M0QXU7;O43615	Mitochondrial import inner membrane translocase subunit TIM44	TIMM44	tr|M0QXU7|M0QXU7_HUMAN Mitochondrial import inner membrane translocase subunit TIM44 (Fragment) OS=Homo sapiens OX=9606 GN=TIMM44 PE=1 SV=1;sp|O43615|TIM44_HUMAN Mitochondrial import inner membrane translocase subunit TIM44 OS=Homo sapiens OX=9606 GN=TIMM4	0	657	0	16900000	500	0.00739223	0	627	0	2	2	2	9.5	31.16	273	0	14.152	16900000	2			467
Q14694;H3BQP1;H3BNS8;H3BNA1;J3KT19	Ubiquitin carboxyl-terminal hydrolase 10	USP10	sp|Q14694|UBP10_HUMAN Ubiquitin carboxyl-terminal hydrolase 10 OS=Homo sapiens OX=9606 GN=USP10 PE=1 SV=2;tr|H3BQP1|H3BQP1_HUMAN Ubiquitinyl hydrolase 1 (Fragment) OS=Homo sapiens OX=9606 GN=USP10 PE=1 SV=1	0	657	0	16823000	501	0.00735855	240510	528	0.00184934	5	5	5	8.3	87.133	798	0	50.943	17064000	10			962
P28070	Proteasome subunit beta type-4	PSMB4	sp|P28070|PSB4_HUMAN Proteasome subunit beta type-4 OS=Homo sapiens OX=9606 GN=PSMB4 PE=1 SV=4	31224000	42	0.335308	16775000	502	0.00733755	20919000	63	0.160852	1	12	12	53	29.204	264	0	218.96	68918000	48			704
A6PVX3;Q5VWC4;P55036;A2A3N6	26S proteasome non-ATPase regulatory subunit 4;Putative PIP5K1A and PSMD4-like protein	PSMD4;PIPSL	tr|A6PVX3|A6PVX3_HUMAN 26S proteasome non-ATPase regulatory subunit 4 (Fragment) OS=Homo sapiens OX=9606 GN=PSMD4 PE=1 SV=1;tr|Q5VWC4|Q5VWC4_HUMAN 26S proteasome non-ATPase regulatory subunit 4 OS=Homo sapiens OX=9606 GN=PSMD4 PE=1 SV=1;sp|P55036|PSMD4_HUM	0	657	0	16656000	503	0.0072855	1123600	283	0.00863965	4	4	4	22.7	21.783	203	0	23.654	17780000	5			176
O43396;K7ER96;K7EKG2;K7EPB7;K7EML9	Thioredoxin-like protein 1	TXNL1	sp|O43396|TXNL1_HUMAN Thioredoxin-like protein 1 OS=Homo sapiens OX=9606 GN=TXNL1 PE=1 SV=3;tr|K7ER96|K7ER96_HUMAN Thioredoxin-like protein 1 (Fragment) OS=Homo sapiens OX=9606 GN=TXNL1 PE=1 SV=1	0	657	0	16629000	504	0.00727369	390490	432	0.00300258	5	4	4	24.6	32.251	289	0	25.045	17019000	6			512
J3KR97;Q9BTW9;I3L439;I3L1S3;I3L143;I3L163;I3L500;A0A0J9YVU1;I3L4D2;I3L3H4;I3L131;I3L0V3;A0A0J9YWI5;A0A0J9YVR1	Tubulin-specific chaperone D	TBCD	tr|J3KR97|J3KR97_HUMAN Tubulin-specific chaperone D OS=Homo sapiens OX=9606 GN=TBCD PE=1 SV=1;sp|Q9BTW9|TBCD_HUMAN Tubulin-specific chaperone D OS=Homo sapiens OX=9606 GN=TBCD PE=1 SV=2;tr|I3L439|I3L439_HUMAN Tubulin-specific chaperone D (Fragment) OS=Homo	0	657	0	16610000	505	0.00726538	0	627	0	14	6	6	8.2	136.55	1230	0	53.391	16610000	11			410
A0A087WUB9;Q8WYA6	Beta-catenin-like protein 1	CTNNBL1	tr|A0A087WUB9|A0A087WUB9_HUMAN Beta-catenin-like protein 1 OS=Homo sapiens OX=9606 GN=CTNNBL1 PE=1 SV=1;sp|Q8WYA6|CTBL1_HUMAN Beta-catenin-like protein 1 OS=Homo sapiens OX=9606 GN=CTNNBL1 PE=1 SV=1	0	657	0	16496000	506	0.00721551	221170	535	0.00170063	2	5	5	12	65.702	568	0	37.581	16717000	6			16
P84077;P61204;F5H0C7;F5H423;C9J1Z8;F5H1V1;F5H6T5;F8WDB3;H0YGG7	ADP-ribosylation factor 1;ADP-ribosylation factor 3	ARF1;ARF3;ARF5	sp|P84077|ARF1_HUMAN ADP-ribosylation factor 1 OS=Homo sapiens OX=9606 GN=ARF1 PE=1 SV=2;sp|P61204|ARF3_HUMAN ADP-ribosylation factor 3 OS=Homo sapiens OX=9606 GN=ARF3 PE=1 SV=2;tr|F5H0C7|F5H0C7_HUMAN ADP-ribosylation factor 3 (Fragment) OS=Homo sapiens OX	0	657	0	16439000	507	0.00719058	0	627	0	9	5	2	44.8	20.697	181	0	21.442	16439000	3			841
Q13162;H7C3T4;A6NG45	Peroxiredoxin-4	PRDX4	sp|Q13162|PRDX4_HUMAN Peroxiredoxin-4 OS=Homo sapiens OX=9606 GN=PRDX4 PE=1 SV=1;tr|H7C3T4|H7C3T4_HUMAN Peroxiredoxin-4 (Fragment) OS=Homo sapiens OX=9606 GN=PRDX4 PE=1 SV=1	438140	336	0.00470509	16424000	508	0.00718402	395100	428	0.00303803	3	7	5	32.1	30.54	271	0	75.071	17257000	9			935
V9GY54;Q5TAQ9;Q5TAQ8	DDB1- and CUL4-associated factor 8	DCAF8	tr|V9GY54|V9GY54_HUMAN DDB1- and CUL4-associated factor 8 OS=Homo sapiens OX=9606 GN=DCAF8 PE=1 SV=1;sp|Q5TAQ9|DCAF8_HUMAN DDB1- and CUL4-associated factor 8 OS=Homo sapiens OX=9606 GN=DCAF8 PE=1 SV=1	0	657	0	16407000	509	0.00717659	0	627	0	3	3	3	8.9	46.525	417	0	19.325	16407000	3			1014
Q49AR2;E5RFG1;B4DR92;E5RHP8	UPF0489 protein C5orf22	C5orf22	sp|Q49AR2|CE022_HUMAN UPF0489 protein C5orf22 OS=Homo sapiens OX=9606 GN=C5orf22 PE=1 SV=2;tr|E5RFG1|E5RFG1_HUMAN UPF0489 protein C5orf22 OS=Homo sapiens OX=9606 GN=C5orf22 PE=1 SV=1;tr|B4DR92|B4DR92_HUMAN UPF0489 protein C5orf22 OS=Homo sapiens OX=9606 GN	0	657	0	16406000	510	0.00717615	0	627	0	4	2	2	8.1	49.967	442	0	12.43	16406000	2			999
P62081;B5MCP9;A0A2R8Y623	40S ribosomal protein S7	RPS7	sp|P62081|RS7_HUMAN 40S ribosomal protein S7 OS=Homo sapiens OX=9606 GN=RPS7 PE=1 SV=1;tr|B5MCP9|B5MCP9_HUMAN 40S ribosomal protein S7 OS=Homo sapiens OX=9606 GN=RPS7 PE=1 SV=1;tr|A0A2R8Y623|A0A2R8Y623_HUMAN 40S ribosomal protein S7 (Fragment) OS=Homo sapi	273950	405	0.00294189	16162000	511	0.00706942	603640	375	0.00464154	3	5	5	29.9	22.127	194	0	57.374	17039000	10			848
Q9BPX3;H0Y9Z8;D6RA93	Condensin complex subunit 3	NCAPG	sp|Q9BPX3|CND3_HUMAN Condensin complex subunit 3 OS=Homo sapiens OX=9606 GN=NCAPG PE=1 SV=1	328300	377	0.00352554	16031000	512	0.00701212	0	627	0	3	10	10	12.3	114.33	1015	0	62.521	16359000	13			1124
A0A0A0MQR7;P19388;A0A087WVZ9;A0A087WWX0;A0A087WVN5	DNA-directed RNA polymerases I, II, and III subunit RPABC1	POLR2E	tr|A0A0A0MQR7|A0A0A0MQR7_HUMAN DNA-directed RNA polymerase II subunit E OS=Homo sapiens OX=9606 GN=POLR2E PE=1 SV=1;sp|P19388|RPAB1_HUMAN DNA-directed RNA polymerases I, II, and III subunit RPABC1 OS=Homo sapiens OX=9606 GN=POLR2E PE=1 SV=4;tr|A0A087WVZ9|A	0	657	0	15924000	513	0.00696532	0	627	0	5	5	5	42.6	23.566	204	0	56.404	15924000	6			50
E7ER27;A0A2R8YD50;P51659;A0A2R8YDT8;A0A2R8YF45;A0A2R8YEG2;A0A2R8Y7W2;A0A2R8Y7L2;E7ET17	Peroxisomal multifunctional enzyme type 2;(3R)-hydroxyacyl-CoA dehydrogenase;Enoyl-CoA hydratase 2	HSD17B4	tr|E7ER27|E7ER27_HUMAN Peroxisomal multifunctional enzyme type 2 OS=Homo sapiens OX=9606 GN=HSD17B4 PE=1 SV=3;tr|A0A2R8YD50|A0A2R8YD50_HUMAN Peroxisomal multifunctional enzyme type 2 OS=Homo sapiens OX=9606 GN=HSD17B4 PE=1 SV=1;sp|P51659|DHB4_HUMAN Peroxis	103110	558	0.00110728	15859000	514	0.00693688	0	627	0	9	4	4	9.8	53.928	500	0	35.318	15962000	6			119
Q9GZL7	Ribosome biogenesis protein WDR12	WDR12	sp|Q9GZL7|WDR12_HUMAN Ribosome biogenesis protein WDR12 OS=Homo sapiens OX=9606 GN=WDR12 PE=1 SV=2	65871	616	0.000707374	15649000	515	0.00684503	0	627	0	1	4	4	16.5	47.707	423	0	26.138	15715000	7			1146
Q15042	Rab3 GTPase-activating protein catalytic subunit	RAB3GAP1	sp|Q15042|RB3GP_HUMAN Rab3 GTPase-activating protein catalytic subunit OS=Homo sapiens OX=9606 GN=RAB3GAP1 PE=1 SV=3	0	657	0	15641000	516	0.00684153	179750	560	0.00138214	1	6	6	9.8	110.52	981	0	38.493	15820000	9			968
O43592;F8WDU6;F5GZM3	Exportin-T	XPOT	sp|O43592|XPOT_HUMAN Exportin-T OS=Homo sapiens OX=9606 GN=XPOT PE=1 SV=2	0	657	0	15626000	517	0.00683497	0	627	0	3	8	8	12.7	109.96	962	0	48.152	15626000	9			514
Q8IXW5	Putative RNA polymerase II subunit B1 CTD phosphatase RPAP2	RPAP2	sp|Q8IXW5|RPAP2_HUMAN Putative RNA polymerase II subunit B1 CTD phosphatase RPAP2 OS=Homo sapiens OX=9606 GN=RPAP2 PE=1 SV=1	0	657	0	15625000	518	0.00683453	0	627	0	1	3	3	7.8	69.508	612	0	18.637	15625000	3			1052
P05455;E7ERC4;E9PFL9;E9PGX9	Lupus La protein	SSB	sp|P05455|LA_HUMAN Lupus La protein OS=Homo sapiens OX=9606 GN=SSB PE=1 SV=2;tr|E7ERC4|E7ERC4_HUMAN Lupus La protein (Fragment) OS=Homo sapiens OX=9606 GN=SSB PE=1 SV=1;tr|E9PFL9|E9PFL9_HUMAN Lupus La protein OS=Homo sapiens OX=9606 GN=SSB PE=1 SV=1	0	657	0	15554000	519	0.00680347	0	627	0	4	4	4	13.2	46.836	408	0	26.442	15554000	5			588
C9JRH2;C9J3R0;C9JMJ4;C9JQZ4;C9JW69;P18754	Regulator of chromosome condensation	RCC1	tr|C9JRH2|C9JRH2_HUMAN Regulator of chromosome condensation (Fragment) OS=Homo sapiens OX=9606 GN=RCC1 PE=1 SV=1;tr|C9J3R0|C9J3R0_HUMAN Regulator of chromosome condensation (Fragment) OS=Homo sapiens OX=9606 GN=RCC1 PE=1 SV=9;tr|C9JMJ4|C9JMJ4_HUMAN Regulat	0	657	0	15511000	520	0.00678467	889480	310	0.00683944	6	4	4	30.9	24.465	230	0	46.243	16400000	7			216
Q9NRL3;F5GYK2;M0R0P4;M0R0W8;R4GN16;M0R317;M0QZM0	Striatin-4	STRN4	sp|Q9NRL3|STRN4_HUMAN Striatin-4 OS=Homo sapiens OX=9606 GN=STRN4 PE=1 SV=2;tr|F5GYK2|F5GYK2_HUMAN Striatin-4 OS=Homo sapiens OX=9606 GN=STRN4 PE=1 SV=1	84998	583	0.000912774	15494000	521	0.00677723	170900	566	0.00131409	7	6	5	15.5	80.595	753	0	35.003	15750000	6			1170
A6NHL2	Tubulin alpha chain-like 3	TUBAL3	sp|A6NHL2|TBAL3_HUMAN Tubulin alpha chain-like 3 OS=Homo sapiens OX=9606 GN=TUBAL3 PE=1 SV=2	0	657	0	15477000	522	0.00676979	0	627	0	1	6	1	9.9	49.908	446	0.0010111	11.347	15477000	1			169
Q9NRX4	14 kDa phosphohistidine phosphatase	PHPT1	sp|Q9NRX4|PHP14_HUMAN 14 kDa phosphohistidine phosphatase OS=Homo sapiens OX=9606 GN=PHPT1 PE=1 SV=1	327420	379	0.00351609	15358000	523	0.00671774	715060	352	0.00549828	1	3	3	37.6	13.832	125	0	60.966	16400000	6			1171
P52907	F-actin-capping protein subunit alpha-1	CAPZA1	sp|P52907|CAZA1_HUMAN F-actin-capping protein subunit alpha-1 OS=Homo sapiens OX=9606 GN=CAPZA1 PE=1 SV=3	830790	256	0.00892167	15200000	524	0.00664863	1258000	266	0.00967309	1	6	4	35.7	32.922	286	0	47.584	17289000	8			811
C9J4Z3;P61513;M0R0A1;Q6P4E4;E9PEL3;M0R2L6;G5E9R3	60S ribosomal protein L37a	RPL37A	tr|C9J4Z3|C9J4Z3_HUMAN 60S ribosomal protein L37a OS=Homo sapiens OX=9606 GN=RPL37A PE=1 SV=1;sp|P61513|RL37A_HUMAN 60S ribosomal protein L37a OS=Homo sapiens OX=9606 GN=RPL37A PE=1 SV=2;tr|M0R0A1|M0R0A1_HUMAN 60S ribosomal protein L37a OS=Homo sapiens OX=	1041700	220	0.0111866	15153000	525	0.00662807	719750	351	0.00553434	7	3	3	57.4	7.624	68	0	173.78	16914000	8			217
J3QT28;O43684;J3QSX4	Mitotic checkpoint protein BUB3	BUB3	tr|J3QT28|J3QT28_HUMAN Mitotic checkpoint protein BUB3 (Fragment) OS=Homo sapiens OX=9606 GN=BUB3 PE=1 SV=1;sp|O43684|BUB3_HUMAN Mitotic checkpoint protein BUB3 OS=Homo sapiens OX=9606 GN=BUB3 PE=1 SV=1	0	657	0	15017000	526	0.00656859	0	627	0	3	5	5	25.5	31.703	278	0	30.06	15017000	7			419
A6NJA2;P54578;J3QQT6;J3KS55	Ubiquitin carboxyl-terminal hydrolase;Ubiquitin carboxyl-terminal hydrolase 14	USP14	tr|A6NJA2|A6NJA2_HUMAN Ubiquitin carboxyl-terminal hydrolase OS=Homo sapiens OX=9606 GN=USP14 PE=1 SV=2;sp|P54578|UBP14_HUMAN Ubiquitin carboxyl-terminal hydrolase 14 OS=Homo sapiens OX=9606 GN=USP14 PE=1 SV=3	98508	565	0.00105786	14948000	527	0.0065384	173770	565	0.00133616	4	6	6	24.8	51.086	448	0	38.516	15220000	9			171
P20618	Proteasome subunit beta type-1	PSMB1	sp|P20618|PSB1_HUMAN Proteasome subunit beta type-1 OS=Homo sapiens OX=9606 GN=PSMB1 PE=1 SV=2	59402000	30	0.637905	14922000	528	0.00652703	49816000	36	0.383048	1	21	21	77.6	26.489	241	0	323.31	124140000	64			665
P63151;Q66LE6;E5RIY1;H0YB06;A0A590UJJ1;A0A590UJY3;Q00005	Serine/threonine-protein phosphatase 2A 55 kDa regulatory subunit B alpha isoform;Serine/threonine-protein phosphatase 2A 55 kDa regulatory subunit B delta isoform	PPP2R2A;PPP2R2D	sp|P63151|2ABA_HUMAN Serine/threonine-protein phosphatase 2A 55 kDa regulatory subunit B alpha isoform OS=Homo sapiens OX=9606 GN=PPP2R2A PE=1 SV=1;sp|Q66LE6|2ABD_HUMAN Serine/threonine-protein phosphatase 2A 55 kDa regulatory subunit B delta isoform OS=Ho	425300	340	0.0045672	14905000	529	0.0065196	0	627	0	7	3	3	9.6	51.691	447	0	61.689	15330000	4			874
Q15061;C9IZK7;C9JEE7	WD repeat-containing protein 43	WDR43	sp|Q15061|WDR43_HUMAN WD repeat-containing protein 43 OS=Homo sapiens OX=9606 GN=WDR43 PE=1 SV=3;tr|C9IZK7|C9IZK7_HUMAN WD repeat-containing protein 43 (Fragment) OS=Homo sapiens OX=9606 GN=WDR43 PE=1 SV=1	0	657	0	14745000	530	0.00644961	0	627	0	3	3	3	4.4	74.89	677	0	21.305	14745000	4			970
E9PQX9;C9JCC6;Q14919;E9PNC7;E9PMW2	Dr1-associated corepressor	DRAP1	tr|E9PQX9|E9PQX9_HUMAN Dr1-associated corepressor OS=Homo sapiens OX=9606 GN=DRAP1 PE=1 SV=1;tr|C9JCC6|C9JCC6_HUMAN Dr1-associated corepressor OS=Homo sapiens OX=9606 GN=DRAP1 PE=1 SV=1;sp|Q14919|NC2A_HUMAN Dr1-associated corepressor OS=Homo sapiens OX=960	0	657	0	14688000	531	0.00642468	0	627	0	5	3	3	18.9	19.966	185	0	30.208	14688000	5			222
H7C3I1;F6VDH7;Q3KNR6;Q8IZP2;P50502;Q8NFI4	Putative protein FAM10A4;Hsc70-interacting protein;Putative protein FAM10A5	ST13;ST13P4;ST13P5	tr|H7C3I1|H7C3I1_HUMAN Hsc70-interacting protein (Fragment) OS=Homo sapiens OX=9606 GN=ST13 PE=1 SV=1;tr|F6VDH7|F6VDH7_HUMAN Hsc70-interacting protein (Fragment) OS=Homo sapiens OX=9606 GN=ST13 PE=1 SV=1;tr|Q3KNR6|Q3KNR6_HUMAN Hsc70-interacting protein OS=	0	657	0	14684000	532	0.00642293	0	627	0	6	2	2	16.4	16.219	146	0	28.294	14684000	3			330
A0A024R4E5;C9JT62;C9JHS7;C9JK79;C9JHZ8;C9JES8;C9JZI8;C9J5E5;C9JIZ1;Q00341;C9JBS3;C9JEJ8;C9JHN6;C9JMQ6;C9JQ82;H7BZC3;H0Y394	Vigilin	HDLBP	tr|A0A024R4E5|A0A024R4E5_HUMAN High density lipoprotein binding protein (Vigilin), isoform CRA_a OS=Homo sapiens OX=9606 GN=HDLBP PE=1 SV=1;tr|C9JT62|C9JT62_HUMAN Vigilin (Fragment) OS=Homo sapiens OX=9606 GN=HDLBP PE=1 SV=2;tr|C9JHS7|C9JHS7_HUMAN Vigilin	125580	531	0.00134858	14659000	533	0.00641199	0	627	0	17	4	4	5	141.44	1268	0	49.443	14784000	7			1
O95347;A0A0C4DGE5	Structural maintenance of chromosomes protein 2	SMC2	sp|O95347|SMC2_HUMAN Structural maintenance of chromosomes protein 2 OS=Homo sapiens OX=9606 GN=SMC2 PE=1 SV=2	901700	241	0.00968315	14630000	534	0.00639931	1755500	227	0.0134985	2	14	14	15	135.65	1197	0	167.71	17287000	24			566
A0A2R8Y891;P08237;F8VZI0;F8VSF7;F8VTQ3;F8VW30;F8VUB8;F8VYK8;F8VX13;F8VZQ1;F8VP00	ATP-dependent 6-phosphofructokinase, muscle type	PFKM	tr|A0A2R8Y891|A0A2R8Y891_HUMAN ATP-dependent 6-phosphofructokinase OS=Homo sapiens OX=9606 GN=PFKM PE=1 SV=1;sp|P08237|PFKAM_HUMAN ATP-dependent 6-phosphofructokinase, muscle type OS=Homo sapiens OX=9606 GN=PFKM PE=1 SV=2;tr|F8VZI0|F8VZI0_HUMAN ATP-depende	0	657	0	14582000	535	0.00637831	272830	498	0.00209786	11	7	6	10.6	96.907	883	0	82.065	14855000	13			117
P22234;E9PBS1;D6RF62	Multifunctional protein ADE2;Phosphoribosylaminoimidazole-succinocarboxamide synthase;Phosphoribosylaminoimidazole carboxylase	PAICS	sp|P22234|PUR6_HUMAN Multifunctional protein ADE2 OS=Homo sapiens OX=9606 GN=PAICS PE=1 SV=3;tr|E9PBS1|E9PBS1_HUMAN AIR carboxylase (Fragment) OS=Homo sapiens OX=9606 GN=PAICS PE=1 SV=1;tr|D6RF62|D6RF62_HUMAN AIR carboxylase OS=Homo sapiens OX=9606 GN=PAIC	695300	277	0.00746667	14470000	536	0.00632932	431010	415	0.00331415	3	7	7	25.6	47.079	425	0	65.61	15596000	14			672
X6RJP6;P37802	Transgelin-2	TAGLN2	tr|X6RJP6|X6RJP6_HUMAN Transgelin-2 (Fragment) OS=Homo sapiens OX=9606 GN=TAGLN2 PE=1 SV=1;sp|P37802|TAGL2_HUMAN Transgelin-2 OS=Homo sapiens OX=9606 GN=TAGLN2 PE=1 SV=3	0	657	0	14465000	537	0.00632714	0	627	0	2	3	3	28.9	21.086	187	0	28.56	14465000	5			741
P42025	Beta-centractin	ACTR1B	sp|P42025|ACTY_HUMAN Beta-centractin OS=Homo sapiens OX=9606 GN=ACTR1B PE=1 SV=1	546060	319	0.00586402	14414000	538	0.00630483	1178000	274	0.00905794	1	10	3	38.3	42.293	376	0	25.952	16138000	7			756
G3V154;F2Z2T0;Q3YEC7;H0Y7H6	Rab-like protein 6	RABL6	tr|G3V154|G3V154_HUMAN Chromosome 9 open reading frame 86, isoform CRA_d OS=Homo sapiens OX=9606 GN=RABL6 PE=1 SV=1;tr|F2Z2T0|F2Z2T0_HUMAN Rab-like protein 6 OS=Homo sapiens OX=9606 GN=RABL6 PE=1 SV=1;sp|Q3YEC7|RABL6_HUMAN Rab-like protein 6 OS=Homo sapien	0	657	0	14406000	539	0.00630133	0	627	0	4	3	3	11	51.326	471	0	20.749	14406000	7			311
P53396;K7ESG8	ATP-citrate synthase	ACLY	sp|P53396|ACLY_HUMAN ATP-citrate synthase OS=Homo sapiens OX=9606 GN=ACLY PE=1 SV=3	553860	313	0.00594778	14181000	540	0.00620291	1570100	240	0.0120729	2	9	9	11.4	120.84	1101	0	83.077	16305000	20			813
P45954	Short/branched chain specific acyl-CoA dehydrogenase, mitochondrial	ACADSB	sp|P45954|ACDSB_HUMAN Short/branched chain specific acyl-CoA dehydrogenase, mitochondrial OS=Homo sapiens OX=9606 GN=ACADSB PE=1 SV=1	0	657	0	14148000	541	0.00618848	0	627	0	1	3	3	9	47.485	432	0	18.018	14148000	3			763
O60506;B7Z645;A0A6Q8PEX7;A0A6Q8PH31;B4DT28;O43390;F6UXX1;A0A6Q8PHG0;A0A6Q8PH35	Heterogeneous nuclear ribonucleoprotein Q;Heterogeneous nuclear ribonucleoprotein R	SYNCRIP;HNRNPR	sp|O60506|HNRPQ_HUMAN Heterogeneous nuclear ribonucleoprotein Q OS=Homo sapiens OX=9606 GN=SYNCRIP PE=1 SV=2;tr|B7Z645|B7Z645_HUMAN Heterogeneous nuclear ribonucleoprotein Q OS=Homo sapiens OX=9606 GN=SYNCRIP PE=1 SV=1;tr|A0A6Q8PEX7|A0A6Q8PEX7_HUMAN Hetero	0	657	0	14131000	542	0.00618104	121430	596	0.000933706	9	4	4	7.1	69.602	623	0	23.632	14252000	4			531
P46776;E9PJD9;E9PLL6;E9PLX7	60S ribosomal protein L27a	RPL27A	sp|P46776|RL27A_HUMAN 60S ribosomal protein L27a OS=Homo sapiens OX=9606 GN=RPL27A PE=1 SV=2;tr|E9PJD9|E9PJD9_HUMAN 60S ribosomal protein L27a OS=Homo sapiens OX=9606 GN=RPL27A PE=1 SV=1;tr|E9PLL6|E9PLL6_HUMAN 60S ribosomal protein L27a OS=Homo sapiens OX=	4309800	128	0.046282	14098000	543	0.00616661	5002300	139	0.038464	4	7	7	39.9	16.561	148	0	65.663	23410000	17			767
J3QLE5;P63162;P14678;J3KRY3;S4R3P3	Small nuclear ribonucleoprotein-associated protein N;Small nuclear ribonucleoprotein-associated proteins B and B	SNRPN;SNRPB	tr|J3QLE5|J3QLE5_HUMAN Small nuclear ribonucleoprotein-associated protein N (Fragment) OS=Homo sapiens OX=9606 GN=SNRPN PE=1 SV=1;sp|P63162|RSMN_HUMAN Small nuclear ribonucleoprotein-associated protein N OS=Homo sapiens OX=9606 GN=SNRPN PE=1 SV=1;sp|P14678	0	657	0	13992000	544	0.00612024	0	627	0	5	4	4	17.8	17.546	169	0	34.735	13992000	3			416
A0A494C0X0;Q99426;K7EP07;K7EK42;K7EQH0;K7ER04;K7EL99	Tubulin-folding cofactor B	TBCB	tr|A0A494C0X0|A0A494C0X0_HUMAN Tubulin-folding cofactor B OS=Homo sapiens OX=9606 GN=TBCB PE=1 SV=1;sp|Q99426|TBCB_HUMAN Tubulin-folding cofactor B OS=Homo sapiens OX=9606 GN=TBCB PE=1 SV=2;tr|K7EP07|K7EP07_HUMAN Tubulin-folding cofactor B (Fragment) OS=Ho	248260	420	0.00266601	13981000	545	0.00611543	411690	421	0.00316559	7	5	5	22	31.162	282	0	58.26	14641000	11			138
P34932;A0A087WTS8;A0A087WYC1;D6RJ96	Heat shock 70 kDa protein 4	HSPA4	sp|P34932|HSP74_HUMAN Heat shock 70 kDa protein 4 OS=Homo sapiens OX=9606 GN=HSPA4 PE=1 SV=4;tr|A0A087WTS8|A0A087WTS8_HUMAN Heat shock 70 kDa protein 4 OS=Homo sapiens OX=9606 GN=HSPA4 PE=1 SV=1;tr|A0A087WYC1|A0A087WYC1_HUMAN Heat shock 70 kDa protein 4 OS	1082700	216	0.0116269	13840000	546	0.00605375	269190	504	0.00206987	4	8	7	13.9	94.33	840	0	66.701	15191000	16			729
E7ETK0;A0A2R8Y849;A0A2R8YD14;P62847;A0A2R8Y8A0	40S ribosomal protein S24	RPS24	tr|E7ETK0|E7ETK0_HUMAN 40S ribosomal protein S24 OS=Homo sapiens OX=9606 GN=RPS24 PE=1 SV=1;tr|A0A2R8Y849|A0A2R8Y849_HUMAN 40S ribosomal protein S24 OS=Homo sapiens OX=9606 GN=RPS24 PE=1 SV=1;tr|A0A2R8YD14|A0A2R8YD14_HUMAN 40S ribosomal protein S24 OS=Homo	1064500	218	0.0114314	13804000	547	0.00603801	688280	359	0.00529236	5	4	4	32.1	15.197	131	0	25.313	15557000	9			115
Q96QR8	Transcriptional activator protein Pur-beta	PURB	sp|Q96QR8|PURB_HUMAN Transcriptional activator protein Pur-beta OS=Homo sapiens OX=9606 GN=PURB PE=1 SV=3	0	657	0	13804000	547	0.00603801	0	627	0	1	2	2	13.1	33.24	312	0	21.115	13804000	7			1110
P41227;C9JW55;F8W808;A8MWP7;C9JN83	N-alpha-acetyltransferase 10	NAA10	sp|P41227|NAA10_HUMAN N-alpha-acetyltransferase 10 OS=Homo sapiens OX=9606 GN=NAA10 PE=1 SV=1;tr|C9JW55|C9JW55_HUMAN N-alpha-acetyltransferase 10 (Fragment) OS=Homo sapiens OX=9606 GN=NAA10 PE=1 SV=8;tr|F8W808|F8W808_HUMAN N-alpha-acetyltransferase 10 OS=H	0	657	0	13727000	549	0.00600433	0	627	0	5	4	4	23.8	26.458	235	0	25.771	13727000	4			754
O94776	Metastasis-associated protein MTA2	MTA2	sp|O94776|MTA2_HUMAN Metastasis-associated protein MTA2 OS=Homo sapiens OX=9606 GN=MTA2 PE=1 SV=1	126210	530	0.00135534	13614000	550	0.0059549	195070	549	0.00149994	1	9	8	16.3	75.022	668	0	45.023	13935000	9			560
H0YLP6;H0YMF4;H0YKD8;P46779	60S ribosomal protein L28	RPL28	tr|H0YLP6|H0YLP6_HUMAN 60S ribosomal protein L28 OS=Homo sapiens OX=9606 GN=RPL28 PE=1 SV=1;tr|H0YMF4|H0YMF4_HUMAN 60S ribosomal protein L28 OS=Homo sapiens OX=9606 GN=RPL28 PE=1 SV=1;tr|H0YKD8|H0YKD8_HUMAN 60S ribosomal protein L28 OS=Homo sapiens OX=9606	636050	286	0.0068304	13592000	551	0.00594528	687240	360	0.00528437	4	1	1	11.2	9.657	89	0.0027498	7.0103	14915000	4			377
Q9H2M9;H7C4Y9	Rab3 GTPase-activating protein non-catalytic subunit	RAB3GAP2	sp|Q9H2M9|RBGPR_HUMAN Rab3 GTPase-activating protein non-catalytic subunit OS=Homo sapiens OX=9606 GN=RAB3GAP2 PE=1 SV=1	94666	572	0.0010166	13581000	552	0.00594046	43724	621	0.000336205	2	9	9	12.5	155.98	1393	0	60.325	13719000	15			1152
D6R9P3;D6RD18;D6RBZ0;Q99729	Heterogeneous nuclear ribonucleoprotein A/B	HNRNPAB	tr|D6R9P3|D6R9P3_HUMAN Heterogeneous nuclear ribonucleoprotein A/B OS=Homo sapiens OX=9606 GN=HNRNPAB PE=1 SV=1;tr|D6RD18|D6RD18_HUMAN Heterogeneous nuclear ribonucleoprotein A/B OS=Homo sapiens OX=9606 GN=HNRNPAB PE=1 SV=1;tr|D6RBZ0|D6RBZ0_HUMAN Heterogen	0	657	0	13565000	553	0.00593347	362050	445	0.0027839	4	4	4	17.5	30.302	280	0	28.523	13927000	4			249
P11908;A6NMS2;D3YTJ7;A0A0B4J207;P21108;A0A0A0MRQ9;A0A6Q8PFD7;A0A6Q8PGP2;A0A6Q8PFD1;H7C540	Ribose-phosphate pyrophosphokinase 2	PRPS2	sp|P11908|PRPS2_HUMAN Ribose-phosphate pyrophosphokinase 2 OS=Homo sapiens OX=9606 GN=PRPS2 PE=1 SV=2	0	657	0	13540000	554	0.00592253	691810	357	0.0053195	10	5	2	24.2	34.769	318	0	18.968	14232000	4			622
P05141;P12235;V9GYG0;Q9H0C2	ADP/ATP translocase 2;ADP/ATP translocase 2, N-terminally processed;ADP/ATP translocase 1	SLC25A5;SLC25A4	sp|P05141|ADT2_HUMAN ADP/ATP translocase 2 OS=Homo sapiens OX=9606 GN=SLC25A5 PE=1 SV=7;sp|P12235|ADT1_HUMAN ADP/ATP translocase 1 OS=Homo sapiens OX=9606 GN=SLC25A4 PE=1 SV=4;tr|V9GYG0|V9GYG0_HUMAN ADP/ATP translocase 1 OS=Homo sapiens OX=9606 GN=SLC25A4	0	657	0	13535000	555	0.00592034	0	627	0	4	5	1	15.1	32.852	298	0	13.453	13535000	1			583
O75367;B4DJC3;D6RCF2;Q5SQT3;Q9P0M6	Core histone macro-H2A.1;Histone H2A	H2AFY	sp|O75367|H2AY_HUMAN Core histone macro-H2A.1 OS=Homo sapiens OX=9606 GN=MACROH2A1 PE=1 SV=4;tr|B4DJC3|B4DJC3_HUMAN Histone H2A OS=Homo sapiens OX=9606 GN=MACROH2A1 PE=1 SV=1;tr|D6RCF2|D6RCF2_HUMAN Histone H2A OS=Homo sapiens OX=9606 GN=MACROH2A1 PE=1 SV=1	0	657	0	13454000	556	0.00588491	0	627	0	5	4	4	16.1	39.617	372	0	25.753	13454000	5			542
O94906	Pre-mRNA-processing factor 6	PRPF6	sp|O94906|PRP6_HUMAN Pre-mRNA-processing factor 6 OS=Homo sapiens OX=9606 GN=PRPF6 PE=1 SV=1	0	657	0	13405000	557	0.00586348	0	627	0	1	4	4	5.2	106.92	941	0	29.467	13405000	5			561
P23921;E9PL69	Ribonucleoside-diphosphate reductase large subunit	RRM1	sp|P23921|RIR1_HUMAN Ribonucleoside-diphosphate reductase large subunit OS=Homo sapiens OX=9606 GN=RRM1 PE=1 SV=1	0	657	0	13342000	558	0.00583592	0	627	0	2	5	5	7.8	90.069	792	0	43.267	13342000	6			682
A0A087WVR3;A0A087WTW0;Q96T88;A0A087WWG9	E3 ubiquitin-protein ligase UHRF1	UHRF1	tr|A0A087WVR3|A0A087WVR3_HUMAN RING-type E3 ubiquitin transferase OS=Homo sapiens OX=9606 GN=UHRF1 PE=1 SV=1;tr|A0A087WTW0|A0A087WTW0_HUMAN RING-type E3 ubiquitin transferase OS=Homo sapiens OX=9606 GN=UHRF1 PE=1 SV=1;sp|Q96T88|UHRF1_HUMAN E3 ubiquitin-pro	0	657	0	13313000	559	0.00582324	0	627	0	4	5	5	7.3	91.099	806	0	62.434	13313000	6			11
O96019;H7C5S0;C9JQT2	Actin-like protein 6A	ACTL6A	sp|O96019|ACL6A_HUMAN Actin-like protein 6A OS=Homo sapiens OX=9606 GN=ACTL6A PE=1 SV=1;tr|H7C5S0|H7C5S0_HUMAN Actin-like protein 6A (Fragment) OS=Homo sapiens OX=9606 GN=ACTL6A PE=1 SV=1	180640	466	0.00193985	13276000	560	0.00580705	248100	524	0.0019077	3	3	3	14.5	47.46	429	0	18.739	13704000	6			573
O43143;A0A140T947;F5H658;Q14562	Pre-mRNA-splicing factor ATP-dependent RNA helicase DHX15	DHX15	sp|O43143|DHX15_HUMAN Pre-mRNA-splicing factor ATP-dependent RNA helicase DHX15 OS=Homo sapiens OX=9606 GN=DHX15 PE=1 SV=2	0	657	0	13187000	561	0.00576813	0	627	0	4	4	3	8.3	90.932	795	0	46.168	13187000	6			509
P32119;A6NIW5	Peroxiredoxin-2	PRDX2	sp|P32119|PRDX2_HUMAN Peroxiredoxin-2 OS=Homo sapiens OX=9606 GN=PRDX2 PE=1 SV=5;tr|A6NIW5|A6NIW5_HUMAN Peroxiredoxin 2, isoform CRA_a OS=Homo sapiens OX=9606 GN=PRDX2 PE=1 SV=2	260790	415	0.00280057	13107000	562	0.00573313	111860	604	0.00086012	2	6	6	39.9	21.892	198	0	38.563	13479000	9			723
P49773;D6REP8;D6RE99;H0YC49;D6RD60;A0A6Q8PGQ8;D6RC06	Histidine triad nucleotide-binding protein 1	HINT1	sp|P49773|HINT1_HUMAN Histidine triad nucleotide-binding protein 1 OS=Homo sapiens OX=9606 GN=HINT1 PE=1 SV=2;tr|D6REP8|D6REP8_HUMAN Histidine triad nucleotide-binding protein 1 OS=Homo sapiens OX=9606 GN=HINT1 PE=1 SV=1;tr|D6RE99|D6RE99_HUMAN Histidine tr	139460	513	0.00149763	13104000	563	0.00573182	832120	318	0.00639838	7	4	4	50.8	13.802	126	0	27.795	14076000	8			790
Q8N1G4	Leucine-rich repeat-containing protein 47	LRRC47	sp|Q8N1G4|LRC47_HUMAN Leucine-rich repeat-containing protein 47 OS=Homo sapiens OX=9606 GN=LRRC47 PE=1 SV=1	0	657	0	13029000	564	0.00569901	0	627	0	1	5	5	18	63.472	583	0	26.92	13029000	5			1057
A0A087WUN7;H0YJ40;G3V4X6;G3V2S9;Q9GZT3;H0YJI1;H0YJW7	SRA stem-loop-interacting RNA-binding protein, mitochondrial	SLIRP	tr|A0A087WUN7|A0A087WUN7_HUMAN SRA stem-loop-interacting RNA-binding protein, mitochondrial OS=Homo sapiens OX=9606 GN=SLIRP PE=1 SV=1;tr|H0YJ40|H0YJ40_HUMAN SRA stem-loop-interacting RNA-binding protein, mitochondrial (Fragment) OS=Homo sapiens OX=9606 GN	0	657	0	12973000	565	0.00567452	370340	440	0.00284764	7	2	2	25	10.353	92	0.0010121	11.375	13343000	3			20
J3QLR8;Q9Y3D9	28S ribosomal protein S23, mitochondrial	MRPS23	tr|J3QLR8|J3QLR8_HUMAN 28S ribosomal protein S23, mitochondrial OS=Homo sapiens OX=9606 GN=MRPS23 PE=1 SV=1;sp|Q9Y3D9|RT23_HUMAN 28S ribosomal protein S23, mitochondrial OS=Homo sapiens OX=9606 GN=MRPS23 PE=1 SV=2	0	657	0	12958000	566	0.00566796	0	627	0	2	4	4	30.3	17.517	152	0	36.308	12958000	6			417
E9PP50;P23528;E9PLJ3;E9PS23;E9PQB7;G3V1A4;E9PK25;Q9Y281	Cofilin-1	CFL1	tr|E9PP50|E9PP50_HUMAN Cofilin, non-muscle isoform (Fragment) OS=Homo sapiens OX=9606 GN=CFL1 PE=1 SV=8;sp|P23528|COF1_HUMAN Cofilin-1 OS=Homo sapiens OX=9606 GN=CFL1 PE=1 SV=3;tr|E9PLJ3|E9PLJ3_HUMAN Cofilin, non-muscle isoform (Fragment) OS=Homo sapiens O	106450	555	0.00114314	12936000	567	0.00565834	0	627	0	8	3	3	37.7	17.777	159	0	21.675	13043000	6			307
Q96A33	Coiled-coil domain-containing protein 47	CCDC47	sp|Q96A33|CCD47_HUMAN Coiled-coil domain-containing protein 47 OS=Homo sapiens OX=9606 GN=CCDC47 PE=1 SV=1	0	657	0	12655000	568	0.00553542	0	627	0	1	3	3	7.5	55.873	483	0	18.605	12655000	4			1093
P22570;A0A0A0MTN9;J3QQX3;A0A0A0MTR6;A0A0C4DFN8;A0A0C4DGN7;A0A0A0MSZ4;A0A0A0MT64;J3QKZ8	NADPH:adrenodoxin oxidoreductase, mitochondrial	FDXR	sp|P22570|ADRO_HUMAN NADPH:adrenodoxin oxidoreductase, mitochondrial OS=Homo sapiens OX=9606 GN=FDXR PE=1 SV=3;tr|A0A0A0MTN9|A0A0A0MTN9_HUMAN NADPH:adrenodoxin oxidoreductase, mitochondrial OS=Homo sapiens OX=9606 GN=FDXR PE=1 SV=1;tr|J3QQX3|J3QQX3_HUMAN N	174340	470	0.0018722	12651000	569	0.00553367	1049100	291	0.0080668	9	6	6	19.1	53.836	491	0	44.745	13874000	13			675
A0A087X020;Q9Y3A5;F8WE72	Ribosome maturation protein SBDS	SBDS	tr|A0A087X020|A0A087X020_HUMAN Ribosome maturation protein SBDS OS=Homo sapiens OX=9606 GN=SBDS PE=1 SV=1;sp|Q9Y3A5|SBDS_HUMAN Ribosome maturation protein SBDS OS=Homo sapiens OX=9606 GN=SBDS PE=1 SV=4	0	657	0	12555000	570	0.00549168	0	627	0	3	4	4	23.6	28.864	250	0	23.791	12555000	2			38
P36578;H3BM89;H3BTP7;H3BU31	60S ribosomal protein L4	RPL4	sp|P36578|RL4_HUMAN 60S ribosomal protein L4 OS=Homo sapiens OX=9606 GN=RPL4 PE=1 SV=5;tr|H3BM89|H3BM89_HUMAN 60S ribosomal protein L4 OS=Homo sapiens OX=9606 GN=RPL4 PE=1 SV=1	556300	311	0.00597398	12436000	571	0.00543963	318710	472	0.00245064	4	6	6	14.5	47.697	427	0	38.703	13311000	7			738
Q00577	Transcriptional activator protein Pur-alpha	PURA	sp|Q00577|PURA_HUMAN Transcriptional activator protein Pur-alpha OS=Homo sapiens OX=9606 GN=PURA PE=1 SV=2	0	657	0	12391000	572	0.00541995	0	627	0	1	3	3	24.2	34.91	322	0	24.393	12391000	8			895
O76003	Glutaredoxin-3	GLRX3	sp|O76003|GLRX3_HUMAN Glutaredoxin-3 OS=Homo sapiens OX=9606 GN=GLRX3 PE=1 SV=2	0	657	0	12362000	573	0.00540726	0	627	0	1	3	3	12.8	37.432	335	0	39.632	12362000	5			556
A0A5F9UP49;Q9BRK5;A0A5F9UJX7;H0Y3T6	45 kDa calcium-binding protein	SDF4	tr|A0A5F9UP49|A0A5F9UP49_HUMAN 45 kDa calcium-binding protein OS=Homo sapiens OX=9606 GN=SDF4 PE=1 SV=1;sp|Q9BRK5|CAB45_HUMAN 45 kDa calcium-binding protein OS=Homo sapiens OX=9606 GN=SDF4 PE=1 SV=1;tr|A0A5F9UJX7|A0A5F9UJX7_HUMAN 45 kDa calcium-binding pro	0	657	0	12192000	574	0.0053329	0	627	0	4	3	3	19.7	40.936	355	0	35.914	12192000	5			146
O60264;A0A0A0MRP6;B7ZLQ5;P28370	SWI/SNF-related matrix-associated actin-dependent regulator of chromatin subfamily A member 5;Probable global transcription activator SNF2L1	SMARCA5;SMARCA1	sp|O60264|SMCA5_HUMAN SWI/SNF-related matrix-associated actin-dependent regulator of chromatin subfamily A member 5 OS=Homo sapiens OX=9606 GN=SMARCA5 PE=1 SV=1;tr|A0A0A0MRP6|A0A0A0MRP6_HUMAN Probable global transcription activator SNF2L1 OS=Homo sapiens O	0	657	0	12016000	575	0.00525592	0	627	0	4	5	5	4.5	121.9	1052	0	28.564	12016000	4			525
E7EQI7;Q12768	WASH complex subunit strumpellin	KIAA0196	tr|E7EQI7|E7EQI7_HUMAN WASH complex subunit 5 OS=Homo sapiens OX=9606 GN=WASHC5 PE=1 SV=1;sp|Q12768|WASC5_HUMAN WASH complex subunit 5 OS=Homo sapiens OX=9606 GN=WASHC5 PE=1 SV=1	0	657	0	11964000	576	0.00523317	0	627	0	2	4	4	5.8	117.06	1011	0	23.685	11964000	4			271
Q9BQ52;G5E9D5;E7ES68;H7C2I4;J3QRS2;V9GYU5;J3QL08;J3QLK4;V9GZ72;V9GYS7	Zinc phosphodiesterase ELAC protein 2	ELAC2	sp|Q9BQ52|RNZ2_HUMAN Zinc phosphodiesterase ELAC protein 2 OS=Homo sapiens OX=9606 GN=ELAC2 PE=1 SV=2;tr|G5E9D5|G5E9D5_HUMAN ElaC homolog protein 2 OS=Homo sapiens OX=9606 GN=ELAC2 PE=1 SV=1;tr|E7ES68|E7ES68_HUMAN Zinc phosphodiesterase ELAC protein 2 (Fra	0	657	0	11891000	577	0.00520124	0	627	0	10	5	5	9.7	92.218	826	0	35.842	11891000	6			1125
C9JB90;C9JU14;J3KR73;Q9NRW1;P20340;Q14964	Ras-related protein Rab-6B;Ras-related protein Rab-6A;Ras-related protein Rab-39A	RAB6B;RAB6A;RAB39A	tr|C9JB90|C9JB90_HUMAN Ras-related protein Rab-6B (Fragment) OS=Homo sapiens OX=9606 GN=RAB6B PE=4 SV=1;tr|C9JU14|C9JU14_HUMAN Ras-related protein Rab-6B (Fragment) OS=Homo sapiens OX=9606 GN=RAB6B PE=1 SV=3;tr|J3KR73|J3KR73_HUMAN Ras-related protein Rab-6	0	657	0	11889000	578	0.00520037	0	627	0	6	1	1	22.4	5.8575	49	0.0060241	6.4151	11889000	1			221
Q96P70	Importin-9	IPO9	sp|Q96P70|IPO9_HUMAN Importin-9 OS=Homo sapiens OX=9606 GN=IPO9 PE=1 SV=3	121460	538	0.00130433	11867000	579	0.00519074	0	627	0	1	8	8	13.1	115.96	1041	0	74.456	11988000	12			1106
P31153;Q00266	S-adenosylmethionine synthase isoform type-2	MAT2A	sp|P31153|METK2_HUMAN S-adenosylmethionine synthase isoform type-2 OS=Homo sapiens OX=9606 GN=MAT2A PE=1 SV=1	0	657	0	11842000	580	0.00517981	0	627	0	2	3	3	16.2	43.66	395	0	22.26	11842000	4			716
A0A2R8Y6J3;P46777;Q5T7N0;A0A2R8Y4A2	60S ribosomal protein L5	RPL5	tr|A0A2R8Y6J3|A0A2R8Y6J3_HUMAN 60S ribosomal protein L5 (Fragment) OS=Homo sapiens OX=9606 GN=RPL5 PE=1 SV=1;sp|P46777|RL5_HUMAN 60S ribosomal protein L5 OS=Homo sapiens OX=9606 GN=RPL5 PE=1 SV=3;tr|Q5T7N0|Q5T7N0_HUMAN 60S ribosomal protein L5 (Fragment) O	0	657	0	11799000	581	0.005161	364760	444	0.00280473	4	4	4	25.6	27.045	238	0	42.353	12164000	5			109
K7EIG1;I3L2B0;A0A494C0R8;O75153;I3L4B5	Clustered mitochondria protein homolog	CLUH	tr|K7EIG1|K7EIG1_HUMAN Clustered mitochondria protein homolog (Fragment) OS=Homo sapiens OX=9606 GN=CLUH PE=1 SV=2;tr|I3L2B0|I3L2B0_HUMAN Clustered mitochondria protein homolog OS=Homo sapiens OX=9606 GN=CLUH PE=1 SV=3;tr|A0A494C0R8|A0A494C0R8_HUMAN Cluste	163830	487	0.00175933	11796000	582	0.00515969	123500	595	0.000949623	5	4	4	4.6	140.49	1251	0	25.289	12084000	6			137
P52701;A0A494C0M1;A0A087WWJ1;F8W7G9;F8WAX8	DNA mismatch repair protein Msh6	MSH6	sp|P52701|MSH6_HUMAN DNA mismatch repair protein Msh6 OS=Homo sapiens OX=9606 GN=MSH6 PE=1 SV=2;tr|A0A494C0M1|A0A494C0M1_HUMAN DNA mismatch repair protein OS=Homo sapiens OX=9606 GN=MSH6 PE=1 SV=1;tr|A0A087WWJ1|A0A087WWJ1_HUMAN DNA mismatch repair protein	0	657	0	11747000	583	0.00513825	0	627	0	5	5	5	6.1	152.78	1360	0	35.467	11747000	3			808
P35219	Carbonic anhydrase-related protein	CA8	sp|P35219|CAH8_HUMAN Carbonic anhydrase-related protein OS=Homo sapiens OX=9606 GN=CA8 PE=1 SV=3	0	657	0	11738000	584	0.00513432	0	627	0	1	3	3	13.8	32.973	290	0	20.139	11738000	4			730
Q9NS69	Mitochondrial import receptor subunit TOM22 homolog	TOMM22	sp|Q9NS69|TOM22_HUMAN Mitochondrial import receptor subunit TOM22 homolog OS=Homo sapiens OX=9606 GN=TOMM22 PE=1 SV=3	535140	320	0.00574675	11715000	585	0.00512426	1190700	273	0.0091556	1	4	4	51.4	15.521	142	0	85.818	13441000	9			1172
CON__P35908v2;P35908;CON__P35908;CON__P48668;CON__P04259;CON__P02538;P48668;P02538;CON__Q5XKE5;CON__O95678;Q5XKE5;O95678;CON__Q9R0H5;CON__P07744;CON__Q8VED5;CON__Q6NXH9;CON__Q6IFZ6;CON__Q7Z794;CON__P12035;CON__Q01546;Q7Z794;P12035;Q01546;H0YID6;F8W0C6;F8VUG2;CON__REFSEQ:XP_932229;CON__Q14CN4-1;CON__Q6IME9;CON__Q3SY84;CON__Q7RTS7;CON__Q32MB2;F8W1S1;CON__Q9NSB2;CON__Q6ISB0;Q14CN4;Q3SY84;Q7RTS7;Q86Y…	Keratin, type II cytoskeletal 2 epidermal	KRT2	;sp|P35908|K22E_HUMAN Keratin, type II cytoskeletal 2 epidermal OS=Homo sapiens OX=9606 GN=KRT2 PE=1 SV=2;	5044900	114	0.054176	11710000	586	0.00512207	1678700	235	0.012908	40	17	11	40.4	65.432	639	0	290.11	18434000	34		+	242
E9PD53;Q9NTJ3;C9JR83;C9JVD8;C9J578;C9J9E4;C9JWF0;C9IYK2;C9JJ64	Structural maintenance of chromosomes protein;Structural maintenance of chromosomes protein 4	SMC4	tr|E9PD53|E9PD53_HUMAN Structural maintenance of chromosomes protein OS=Homo sapiens OX=9606 GN=SMC4 PE=1 SV=1;sp|Q9NTJ3|SMC4_HUMAN Structural maintenance of chromosomes protein 4 OS=Homo sapiens OX=9606 GN=SMC4 PE=1 SV=2;tr|C9JR83|C9JR83_HUMAN Structural	0	657	0	11667000	587	0.00510326	689360	358	0.00530067	9	8	8	11	144.45	1263	0	78.529	12357000	11			285
O60749;D6RC15;H0YK42;Q13596	Sorting nexin-2	SNX2	sp|O60749|SNX2_HUMAN Sorting nexin-2 OS=Homo sapiens OX=9606 GN=SNX2 PE=1 SV=2	0	657	0	11610000	588	0.00507833	0	627	0	4	4	4	9.2	58.47	519	0	41.454	11610000	4			534
P20962;F5GXR3	Parathymosin	PTMS	sp|P20962|PTMS_HUMAN Parathymosin OS=Homo sapiens OX=9606 GN=PTMS PE=1 SV=2;tr|F5GXR3|F5GXR3_HUMAN Parathymosin OS=Homo sapiens OX=9606 GN=PTMS PE=1 SV=1	197480	449	0.00212069	11604000	589	0.00507571	940860	302	0.00723451	2	4	4	28.4	11.53	102	0	120.95	12743000	5			667
P33176;A0A0G2JMZ6;J3KNA1;A0A6Q8PEZ8;A0A6Q8PGJ3;O60282;Q12840;A0A6Q8PGT2;A0A6Q8PGN1	Kinesin-1 heavy chain	KIF5B	sp|P33176|KINH_HUMAN Kinesin-1 heavy chain OS=Homo sapiens OX=9606 GN=KIF5B PE=1 SV=1	1205500	210	0.0129456	11604000	589	0.00507571	701570	355	0.00539455	9	10	10	12.9	109.68	963	0	74.715	13511000	13			725
D6RBW1;P06730;D6RHE2;H0Y8J7;H0Y8X3;A6NMX2	Eukaryotic translation initiation factor 4E	EIF4E	tr|D6RBW1|D6RBW1_HUMAN Eukaryotic translation initiation factor 4E OS=Homo sapiens OX=9606 GN=EIF4E PE=1 SV=1;sp|P06730|IF4E_HUMAN Eukaryotic translation initiation factor 4E OS=Homo sapiens OX=9606 GN=EIF4E PE=1 SV=2	0	657	0	11586000	591	0.00506783	0	627	0	6	3	3	13.1	28.512	245	0	25.209	11586000	3			252
A0A140T8Y2;P36915	Guanine nucleotide-binding protein-like 1	GNL1	tr|A0A140T8Y2|A0A140T8Y2_HUMAN Guanine nucleotide-binding protein-like 1 (Fragment) OS=Homo sapiens OX=9606 GN=GNL1 PE=1 SV=1;sp|P36915|GNL1_HUMAN Guanine nucleotide-binding protein-like 1 OS=Homo sapiens OX=9606 GN=GNL1 PE=1 SV=2	0	657	0	11548000	592	0.00505121	0	627	0	2	3	3	9.1	44.787	407	0	17.847	11548000	4			87
A0A087X256;Q2M389;F8W1W1;F8VNZ5;F8VYH7	WASH complex subunit 7	KIAA1033	tr|A0A087X256|A0A087X256_HUMAN WASH complex subunit 4 OS=Homo sapiens OX=9606 GN=WASHC4 PE=1 SV=1;sp|Q2M389|WASC4_HUMAN WASH complex subunit 4 OS=Homo sapiens OX=9606 GN=WASHC4 PE=1 SV=2	0	657	0	11460000	593	0.00501272	0	627	0	5	8	8	12.5	136.5	1174	0	94.261	11460000	12			44
Q9UNN5;B1ANM7;B3KT28	FAS-associated factor 1	FAF1	sp|Q9UNN5|FAF1_HUMAN FAS-associated factor 1 OS=Homo sapiens OX=9606 GN=FAF1 PE=1 SV=2;tr|B1ANM7|B1ANM7_HUMAN FAS-associated factor 1 OS=Homo sapiens OX=9606 GN=FAF1 PE=1 SV=1;tr|B3KT28|B3KT28_HUMAN FAS-associated factor 1 OS=Homo sapiens OX=9606 GN=FAF1 P	988360	229	0.0106138	11447000	594	0.00500703	434280	414	0.00333929	3	9	9	19.2	73.953	650	0	69.024	12870000	16			1218
Q5VUC6	Glycylpeptide N-tetradecanoyltransferase	NMT2	tr|Q5VUC6|Q5VUC6_HUMAN Glycylpeptide N-tetradecanoyltransferase OS=Homo sapiens OX=9606 GN=NMT2 PE=1 SV=1	0	657	0	11389000	595	0.00498166	0	627	0	1	2	1	4.9	56.716	485	0.009205	6.249	11389000	1			1018
F2Z393;P37837	Transaldolase	TALDO1	tr|F2Z393|F2Z393_HUMAN Transaldolase OS=Homo sapiens OX=9606 GN=TALDO1 PE=1 SV=1;sp|P37837|TALDO_HUMAN Transaldolase OS=Homo sapiens OX=9606 GN=TALDO1 PE=1 SV=2	0	657	0	11278000	596	0.00493311	142490	582	0.00109564	2	4	4	14.2	35.328	318	0	24.012	11420000	6			313
Q14118	Dystroglycan;Alpha-dystroglycan;Beta-dystroglycan	DAG1	sp|Q14118|DAG1_HUMAN Dystroglycan OS=Homo sapiens OX=9606 GN=DAG1 PE=1 SV=2	0	657	0	11272000	597	0.00493049	0	627	0	1	2	2	3.9	97.44	895	0.001007	11.276	11272000	2			952
A0A2R8YHI9;A0A2R8Y5Q8;Q15813;A0A2R8YFL4;A0A2R8Y6Q1;A0A2U3TZJ6;A0A2R8Y7E7;A0A2R8Y784;A0A2R8YER9;A0A2R8Y4V6;A0A2R8Y809;A0A2R8Y897;A0A2R8Y7H8;A0A2R8Y5H6;A0A2R8Y6L2;A0A2R8Y787;A0A2R8Y6G3;A0A2R8Y4P2;A0A2R8Y4E7;A0A2R8YFM3	Tubulin-specific chaperone E	TBCE	tr|A0A2R8YHI9|A0A2R8YHI9_HUMAN Tubulin-folding cofactor E OS=Homo sapiens OX=9606 GN=TBCE PE=1 SV=1;tr|A0A2R8Y5Q8|A0A2R8Y5Q8_HUMAN Tubulin-folding cofactor E OS=Homo sapiens OX=9606 GN=TBCE PE=1 SV=1;sp|Q15813|TBCE_HUMAN Tubulin-specific chaperone E OS=Hom	0	657	0	11183000	598	0.00489156	0	627	0	20	4	4	12.7	58.386	520	0	27.519	11183000	8			107
P55010;H0YLZ1;H0YN40;H0YK29;H0YK11;H0YMJ8;H0YM54	Eukaryotic translation initiation factor 5	EIF5	sp|P55010|IF5_HUMAN Eukaryotic translation initiation factor 5 OS=Homo sapiens OX=9606 GN=EIF5 PE=1 SV=2;tr|H0YLZ1|H0YLZ1_HUMAN Eukaryotic translation initiation factor 5 (Fragment) OS=Homo sapiens OX=9606 GN=EIF5 PE=1 SV=1;tr|H0YN40|H0YN40_HUMAN Eukaryoti	0	657	0	10968000	599	0.00479751	0	627	0	7	4	4	13.9	49.222	431	0	24.125	10968000	4			821
P30837	Aldehyde dehydrogenase X, mitochondrial	ALDH1B1	sp|P30837|AL1B1_HUMAN Aldehyde dehydrogenase X, mitochondrial OS=Homo sapiens OX=9606 GN=ALDH1B1 PE=1 SV=3	105620	556	0.00113423	10937000	600	0.00478395	0	627	0	1	5	5	15.9	57.206	517	0	36.503	11042000	8			715
Q9HB71;B2ZWH1	Calcyclin-binding protein	CACYBP	sp|Q9HB71|CYBP_HUMAN Calcyclin-binding protein OS=Homo sapiens OX=9606 GN=CACYBP PE=1 SV=2	0	657	0	10922000	601	0.00477739	0	627	0	2	4	4	23.2	26.21	228	0	56.681	10922000	4			1161
A0A499FIZ0;Q9H7D7;H0Y9R3;C9JCS7	WD repeat-containing protein 26	WDR26	tr|A0A499FIZ0|A0A499FIZ0_HUMAN WD repeat-containing protein 26 OS=Homo sapiens OX=9606 GN=WDR26 PE=1 SV=1;sp|Q9H7D7|WDR26_HUMAN WD repeat-containing protein 26 OS=Homo sapiens OX=9606 GN=WDR26 PE=1 SV=3;tr|H0Y9R3|H0Y9R3_HUMAN WD repeat-containing protein 2	243020	423	0.00260974	10914000	602	0.00477389	368840	442	0.00283611	4	4	4	7.4	81.327	761	0	25.369	11525000	8			142
P56537;B7ZBH1;F8WD20;A0A0B4J1Y7;A0A0U1RQV5;F8WDS6	Eukaryotic translation initiation factor 6	EIF6	sp|P56537|IF6_HUMAN Eukaryotic translation initiation factor 6 OS=Homo sapiens OX=9606 GN=EIF6 PE=1 SV=1;tr|B7ZBH1|B7ZBH1_HUMAN Eukaryotic translation initiation factor 6 (Fragment) OS=Homo sapiens OX=9606 GN=EIF6 PE=1 SV=1	0	657	0	10872000	603	0.00475552	0	627	0	6	3	3	18.8	26.599	245	0	72.199	10872000	5			827
P61970;H3BRV9	Nuclear transport factor 2	NUTF2	sp|P61970|NTF2_HUMAN Nuclear transport factor 2 OS=Homo sapiens OX=9606 GN=NUTF2 PE=1 SV=1;tr|H3BRV9|H3BRV9_HUMAN Nuclear transport factor 2 (Fragment) OS=Homo sapiens OX=9606 GN=NUTF2 PE=1 SV=1	0	657	0	10755000	604	0.00470434	0	627	0	2	4	4	44.1	14.478	127	0	23.684	10755000	5			845
Q04760	Lactoylglutathione lyase	GLO1	sp|Q04760|LGUL_HUMAN Lactoylglutathione lyase OS=Homo sapiens OX=9606 GN=GLO1 PE=1 SV=4	0	657	0	10624000	605	0.00464704	0	627	0	1	3	3	21.2	20.777	184	0	18.503	10624000	4			906
A8MZF9;P55039;J3QR71;J3QRI9;J3QKW7;J3QL90;J3KRL5;J3QKV7	Developmentally-regulated GTP-binding protein 2	DRG2	tr|A8MZF9|A8MZF9_HUMAN Developmentally-regulated GTP-binding protein 2 OS=Homo sapiens OX=9606 GN=DRG2 PE=1 SV=1;sp|P55039|DRG2_HUMAN Developmentally-regulated GTP-binding protein 2 OS=Homo sapiens OX=9606 GN=DRG2 PE=1 SV=1;tr|J3QR71|J3QR71_HUMAN Developme	0	657	0	10580000	606	0.0046278	0	627	0	8	4	4	14.9	38.129	343	0	74.745	10580000	8			181
P21266;A0A0A0MTN3	Glutathione S-transferase Mu 3	GSTM3	sp|P21266|GSTM3_HUMAN Glutathione S-transferase Mu 3 OS=Homo sapiens OX=9606 GN=GSTM3 PE=1 SV=3;tr|A0A0A0MTN3|A0A0A0MTN3_HUMAN Glutathione S-transferase OS=Homo sapiens OX=9606 GN=GSTM3 PE=1 SV=1	0	657	0	10442000	607	0.00456743	0	627	0	2	3	3	20	26.559	225	0	29.504	10442000	4			668
Q01581;D6RIW1	Hydroxymethylglutaryl-CoA synthase, cytoplasmic	HMGCS1	sp|Q01581|HMCS1_HUMAN Hydroxymethylglutaryl-CoA synthase, cytoplasmic OS=Homo sapiens OX=9606 GN=HMGCS1 PE=1 SV=2;tr|D6RIW1|D6RIW1_HUMAN Hydroxymethylglutaryl-CoA synthase, cytoplasmic (Fragment) OS=Homo sapiens OX=9606 GN=HMGCS1 PE=1 SV=8	44312	644	0.000475857	10425000	608	0.00456	0	627	0	2	4	4	13.8	57.293	520	0	70.786	10469000	9			898
A8K968;A0A0A0MRA8;Q9Y2J2;A0A0A0MSA4;A0A1B0GTF8;A0A0J9YW31;A0A0J9YY18;J3KT37;Q4VXN0;A0A2R8Y4N6;A0A1B0GWG0;A0A3B3IUD6;A0A2R8YCW8	Band 4.1-like protein 3;Band 4.1-like protein 3, N-terminally processed	EPB41L3	tr|A8K968|A8K968_HUMAN Band 4.1-like protein 3 OS=Homo sapiens OX=9606 GN=EPB41L3 PE=1 SV=1;tr|A0A0A0MRA8|A0A0A0MRA8_HUMAN Band 4.1-like protein 3 OS=Homo sapiens OX=9606 GN=EPB41L3 PE=1 SV=1;sp|Q9Y2J2|E41L3_HUMAN Band 4.1-like protein 3 OS=Homo sapiens OX	0	657	0	10371000	609	0.00453638	0	627	0	13	5	3	9.3	84.711	756	0	27.569	10371000	5			52
P36507;A0A1B0GUL7;G5E9C7;M0R1B6	Dual specificity mitogen-activated protein kinase kinase 2	MAP2K2	sp|P36507|MP2K2_HUMAN Dual specificity mitogen-activated protein kinase kinase 2 OS=Homo sapiens OX=9606 GN=MAP2K2 PE=1 SV=1;tr|A0A1B0GUL7|A0A1B0GUL7_HUMAN Protein kinase domain-containing protein OS=Homo sapiens OX=9606 PE=1 SV=1;tr|G5E9C7|G5E9C7_HUMAN Du	157200	493	0.00168814	10222000	610	0.0044712	0	627	0	4	6	4	22	44.424	400	0	60.38	10380000	9			737
M0QXH4;G3V1S7;M0R2V0;Q92839;M0R1L3	Hyaluronan synthase 1	HAS1	tr|M0QXH4|M0QXH4_HUMAN Hyaluronan synthase 1 OS=Homo sapiens OX=9606 GN=HAS1 PE=1 SV=1;tr|G3V1S7|G3V1S7_HUMAN Hyaluronan synthase 1 OS=Homo sapiens OX=9606 GN=HAS1 PE=1 SV=1;tr|M0R2V0|M0R2V0_HUMAN Hyaluronan synthase 1 OS=Homo sapiens OX=9606 GN=HAS1 PE=1	145730	504	0.00156496	10178000	611	0.00445196	0	627	0	5	2	2	11.7	23.632	214	0.002002	11.146	10324000	2			349
P45974;H7C5J3;Q92995	Ubiquitin carboxyl-terminal hydrolase 5	USP5	sp|P45974|UBP5_HUMAN Ubiquitin carboxyl-terminal hydrolase 5 OS=Homo sapiens OX=9606 GN=USP5 PE=1 SV=2	0	657	0	10155000	612	0.0044419	196570	547	0.00151148	3	5	5	9.8	95.785	858	0	40.776	10352000	11			764
H0Y3P2;D3DQV9;P78344;E9PKF8;H0YEC5;H0YD77;H0YCH5	Eukaryotic translation initiation factor 4 gamma 2	EIF4G2	tr|H0Y3P2|H0Y3P2_HUMAN Eukaryotic translation initiation factor 4 gamma 2 OS=Homo sapiens OX=9606 GN=EIF4G2 PE=1 SV=1;tr|D3DQV9|D3DQV9_HUMAN Eukaryotic translation initiation factor 4 gamma 2 (Fragment) OS=Homo sapiens OX=9606 GN=EIF4G2 PE=1 SV=1;sp|P78344	0	657	0	10129000	613	0.00443053	0	627	0	7	4	4	4.4	98.117	869	0	22.923	10129000	4			243
E9PRZ9;E9PM92;O00193	Small acidic protein	C11orf58;SMAP	tr|E9PRZ9|E9PRZ9_HUMAN Chromosome 11 open reading frame 58 (Fragment) OS=Homo sapiens OX=9606 GN=C11orf58 PE=1 SV=1;tr|E9PM92|E9PM92_HUMAN Small acidic protein OS=Homo sapiens OX=9606 GN=C11orf58 PE=1 SV=2;sp|O00193|SMAP_HUMAN Small acidic protein OS=Homo	0	657	0	10079000	614	0.00440865	0	627	0	3	1	1	17.8	10.038	90	0	93.848	10079000	3			306
M0QXZ5;Q96B54	Zinc finger protein 428	ZNF428	tr|M0QXZ5|M0QXZ5_HUMAN Zinc finger protein 428 (Fragment) OS=Homo sapiens OX=9606 GN=ZNF428 PE=1 SV=1;sp|Q96B54|ZN428_HUMAN Zinc finger protein 428 OS=Homo sapiens OX=9606 GN=ZNF428 PE=1 SV=2	0	657	0	9960000	615	0.0043566	0	627	0	2	2	2	12.8	23.568	218	0	17.178	9960000	3			468
Q712K3	Ubiquitin-conjugating enzyme E2 R2	UBE2R2	sp|Q712K3|UB2R2_HUMAN Ubiquitin-conjugating enzyme E2 R2 OS=Homo sapiens OX=9606 GN=UBE2R2 PE=1 SV=1	0	657	0	9907500	616	0.00433364	0	627	0	1	3	3	21.8	27.166	238	0	19.022	9907500	4			1033
H0YDX6;H0YD13;H0YD17;H0YDW7;H0YCV9;H0Y2P0;H0Y5E4;P16070;E9PKC6	CD44 antigen	CD44	tr|H0YDX6|H0YDX6_HUMAN CD44 antigen (Fragment) OS=Homo sapiens OX=9606 GN=CD44 PE=1 SV=2;tr|H0YD13|H0YD13_HUMAN CD44 antigen OS=Homo sapiens OX=9606 GN=CD44 PE=1 SV=2;tr|H0YD17|H0YD17_HUMAN CD44 antigen (Fragment) OS=Homo sapiens OX=9606 GN=CD44 PE=1 SV=8;	335980	367	0.00360801	9907400	617	0.0043336	422970	416	0.00325233	9	2	2	12	19.716	183	0	13.074	10666000	4			361
C9JXB8;C9JNW5;P83731	60S ribosomal protein L24	RPL24	tr|C9JXB8|C9JXB8_HUMAN 60S ribosomal protein L24 OS=Homo sapiens OX=9606 GN=RPL24 PE=1 SV=1;tr|C9JNW5|C9JNW5_HUMAN 60S ribosomal protein L24 OS=Homo sapiens OX=9606 GN=RPL24 PE=1 SV=1;sp|P83731|RL24_HUMAN 60S ribosomal protein L24 OS=Homo sapiens OX=9606 G	723170	269	0.00776596	9848600	618	0.00430788	539260	391	0.00414651	3	4	4	27.3	14.369	121	0	43.64	11111000	6			231
B1AHD1;A0A3B3IUA2;P55769;A0A3B3IRU2	NHP2-like protein 1;NHP2-like protein 1, N-terminally processed	NHP2L1	tr|B1AHD1|B1AHD1_HUMAN Ribonucloprotein OS=Homo sapiens OX=9606 GN=SNU13 PE=1 SV=1;tr|A0A3B3IUA2|A0A3B3IUA2_HUMAN Ribonucloprotein OS=Homo sapiens OX=9606 GN=SNU13 PE=1 SV=1;sp|P55769|NH2L1_HUMAN NHP2-like protein 1 OS=Homo sapiens OX=9606 GN=SNU13 PE=1 SV	0	657	0	9777500	619	0.00427678	0	627	0	4	2	2	18.2	14.627	132	0	18.992	9777500	2			131
Q9UHY1;F8W6G1	Nuclear receptor-binding protein	NRBP1	sp|Q9UHY1|NRBP_HUMAN Nuclear receptor-binding protein OS=Homo sapiens OX=9606 GN=NRBP1 PE=1 SV=1;tr|F8W6G1|F8W6G1_HUMAN Nuclear receptor-binding protein OS=Homo sapiens OX=9606 GN=NRBP1 PE=1 SV=1	285270	398	0.00306345	9714700	620	0.00424931	519430	396	0.00399403	2	4	4	8.4	59.844	535	0	24.2	10519000	9			1205
G5E9S8;G3V2E7;F8W6L3;G3V3H3;G3V5R9;E7EVH7;Q07866;A8MZ87;Q9H0B6;E9PQ02;A8MX29;Q9NSK0;H7C4M1;C9JZE5;C9J8T5;K7EL76;Q6P597	Kinesin light chain 1;Kinesin light chain 2	KLC1;KLC2	tr|G5E9S8|G5E9S8_HUMAN Kinesin light chain OS=Homo sapiens OX=9606 GN=KLC1 PE=1 SV=1;tr|G3V2E7|G3V2E7_HUMAN Kinesin light chain OS=Homo sapiens OX=9606 GN=KLC1 PE=1 SV=1;tr|F8W6L3|F8W6L3_HUMAN Kinesin light chain OS=Homo sapiens OX=9606 GN=KLC1 PE=1 SV=1;t	0	657	0	9711000	621	0.00424769	0	627	0	17	5	5	12.4	62.506	549	0	60.609	9711000	6			279
O96017;C9JFD7;H7C0V7;F8WCV2;B7ZBF8;A0A3B3ITA7;H0Y820;B7ZBF7;B7ZBF6	Serine/threonine-protein kinase Chk2	CHEK2	sp|O96017|CHK2_HUMAN Serine/threonine-protein kinase Chk2 OS=Homo sapiens OX=9606 GN=CHEK2 PE=1 SV=1;tr|C9JFD7|C9JFD7_HUMAN Serine/threonine-protein kinase Chk2 OS=Homo sapiens OX=9606 GN=CHEK2 PE=1 SV=2	0	657	0	9657900	622	0.00422446	0	627	0	9	3	3	11	60.914	543	0	18.925	9657900	5			572
P48147;A0A499FJL1	Prolyl endopeptidase	PREP	sp|P48147|PPCE_HUMAN Prolyl endopeptidase OS=Homo sapiens OX=9606 GN=PREP PE=1 SV=2;tr|A0A499FJL1|A0A499FJL1_HUMAN Post-proline cleaving enzyme OS=Homo sapiens OX=9606 GN=PREP PE=1 SV=1	0	657	0	9621700	623	0.00420863	0	627	0	2	2	2	5.6	80.699	710	0.0010309	11.685	9621700	2			776
H0YL72;P50213;H0YNF5;H0YM46	Isocitrate dehydrogenase [NAD] subunit alpha, mitochondrial	IDH3A	tr|H0YL72|H0YL72_HUMAN Isocitrate dehydrogenase [NAD] subunit alpha, mitochondrial OS=Homo sapiens OX=9606 GN=IDH3A PE=1 SV=1;sp|P50213|IDH3A_HUMAN Isocitrate dehydrogenase [NAD] subunit alpha, mitochondrial OS=Homo sapiens OX=9606 GN=IDH3A PE=1 SV=1;tr|H0	0	657	0	9601500	624	0.00419979	174910	564	0.00134493	4	4	4	11.8	35.786	331	0	25.505	9776400	5			381
A0A087WU68;K7EKJ7;K7EK45;A0A6Q8PEX4;A6NLN1;A0A0U1RRM4;P26599	Polypyrimidine tract-binding protein 1	PTBP1	tr|A0A087WU68|A0A087WU68_HUMAN Polypyrimidine tract-binding protein 1 (Fragment) OS=Homo sapiens OX=9606 GN=PTBP1 PE=1 SV=1;tr|K7EKJ7|K7EKJ7_HUMAN Polypyrimidine tract-binding protein 1 (Fragment) OS=Homo sapiens OX=9606 GN=PTBP1 PE=1 SV=7;tr|K7EK45|K7EK45	0	657	0	9591000	625	0.0041952	0	627	0	7	2	2	18.1	23.524	227	0	14.08	9591000	3			15
Q92905;E5RHH5;E5RHF2;E5RFS1;E5RG35;E5RK55	COP9 signalosome complex subunit 5	COPS5	sp|Q92905|CSN5_HUMAN COP9 signalosome complex subunit 5 OS=Homo sapiens OX=9606 GN=COPS5 PE=1 SV=4;tr|E5RHH5|E5RHH5_HUMAN COP9 signalosome complex subunit 5 OS=Homo sapiens OX=9606 GN=COPS5 PE=1 SV=1;tr|E5RHF2|E5RHF2_HUMAN COP9 signalosome complex subunit	1658300	184	0.0178081	9565300	626	0.00418396	1874700	221	0.0144151	6	8	8	32.6	37.578	334	0	76.747	13098000	13			1086
Q58FF6	Putative heat shock protein HSP 90-beta 4	HSP90AB4P	sp|Q58FF6|H90B4_HUMAN Putative heat shock protein HSP 90-beta 4 OS=Homo sapiens OX=9606 GN=HSP90AB4P PE=5 SV=1	0	657	0	9564800	627	0.00418374	0	627	0	1	7	1	12.1	58.264	505	0.0029155	9.527	9564800	1			1001
O75694;E9PF10	Nuclear pore complex protein Nup155	NUP155	sp|O75694|NU155_HUMAN Nuclear pore complex protein Nup155 OS=Homo sapiens OX=9606 GN=NUP155 PE=1 SV=1;tr|E9PF10|E9PF10_HUMAN Nuclear pore complex protein Nup155 OS=Homo sapiens OX=9606 GN=NUP155 PE=1 SV=1	0	657	0	9563300	628	0.00418308	0	627	0	2	6	6	7.5	155.2	1391	0	37.105	9563300	8			549
J3KQ34;Q9H9Q2;A0A087X1P5;J3KQ41;J3QT95;J3QT73	COP9 signalosome complex subunit 7b	COPS7B	tr|J3KQ34|J3KQ34_HUMAN COP9 signalosome complex subunit 7b OS=Homo sapiens OX=9606 GN=COPS7B PE=1 SV=1;sp|Q9H9Q2|CSN7B_HUMAN COP9 signalosome complex subunit 7b OS=Homo sapiens OX=9606 GN=COPS7B PE=1 SV=1;tr|A0A087X1P5|A0A087X1P5_HUMAN COP9 signalosome com	209520	444	0.00224999	9509100	629	0.00415938	785890	329	0.00604291	6	4	4	29.1	26.424	230	0	26.542	10505000	11			409
Q9NXH9;K7EQQ8	tRNA (guanine(26)-N(2))-dimethyltransferase	TRMT1	sp|Q9NXH9|TRM1_HUMAN tRNA (guanine(26)-N(2))-dimethyltransferase OS=Homo sapiens OX=9606 GN=TRMT1 PE=1 SV=1;tr|K7EQQ8|K7EQQ8_HUMAN tRNA (guanine(26)-N(2))-dimethyltransferase (Fragment) OS=Homo sapiens OX=9606 GN=TRMT1 PE=1 SV=1	0	657	0	9504800	630	0.00415749	0	627	0	2	3	3	6.4	72.233	659	0	17.336	9504800	2			1178
P31942	Heterogeneous nuclear ribonucleoprotein H3	HNRNPH3	sp|P31942|HNRH3_HUMAN Heterogeneous nuclear ribonucleoprotein H3 OS=Homo sapiens OX=9606 GN=HNRNPH3 PE=1 SV=2	434740	338	0.00466858	9441800	631	0.00412994	249750	522	0.00192039	1	3	3	14.5	36.926	346	0	52.89	10126000	11			719
Q5T8U3;P62424;Q5T8U2	60S ribosomal protein L7a	RPL7A	tr|Q5T8U3|Q5T8U3_HUMAN 60S ribosomal protein L7a (Fragment) OS=Homo sapiens OX=9606 GN=RPL7A PE=1 SV=1;sp|P62424|RL7A_HUMAN 60S ribosomal protein L7a OS=Homo sapiens OX=9606 GN=RPL7A PE=1 SV=2;tr|Q5T8U2|Q5T8U2_HUMAN 60S ribosomal protein L7a OS=Homo sapien	489400	328	0.00525556	9413100	632	0.00411738	394840	429	0.00303603	3	4	4	21.5	21.545	191	0	40.853	10297000	10			861
Q7L1Q6;E9PFD4;C9JFN4;B5MCE7;C9IZ80;B5MCH7;E7ETZ4;Q9Y6E2	Basic leucine zipper and W2 domain-containing protein 1;Basic leucine zipper and W2 domain-containing protein 2	BZW1;BZW2	sp|Q7L1Q6|BZW1_HUMAN Basic leucine zipper and W2 domain-containing protein 1 OS=Homo sapiens OX=9606 GN=BZW1 PE=1 SV=1;tr|E9PFD4|E9PFD4_HUMAN BZW2 protein OS=Homo sapiens OX=9606 GN=BZW2 PE=1 SV=2;tr|C9JFN4|C9JFN4_HUMAN Basic leucine zipper and W2 domain-c	0	657	0	9336800	633	0.00408401	0	627	0	8	2	2	4.1	48.043	419	0.001006	11.269	9336800	2			1038
H7BY10;K7ERT8;A8MUS3;P62750;K7EMA7;K7EJV9	60S ribosomal protein L23a	RPL23A	tr|H7BY10|H7BY10_HUMAN 60S ribosomal protein L23a (Fragment) OS=Homo sapiens OX=9606 GN=RPL23A PE=1 SV=1;tr|K7ERT8|K7ERT8_HUMAN 60S ribosomal protein L23a (Fragment) OS=Homo sapiens OX=9606 GN=RPL23A PE=1 SV=1;tr|A8MUS3|A8MUS3_HUMAN 60S ribosomal protein L	712190	273	0.00764805	9276700	634	0.00405772	1169800	275	0.00899489	6	4	4	32.9	17.692	158	0	24.624	11159000	7			180
P09661;H0YMA0;H0YKK0;H0YLR3	U2 small nuclear ribonucleoprotein A	SNRPA1	sp|P09661|RU2A_HUMAN U2 small nuclear ribonucleoprotein A OS=Homo sapiens OX=9606 GN=SNRPA1 PE=1 SV=2;tr|H0YMA0|H0YMA0_HUMAN U2 small nuclear ribonucleoprotein A (Fragment) OS=Homo sapiens OX=9606 GN=SNRPA1 PE=1 SV=1;tr|H0YKK0|H0YKK0_HUMAN Small nuclear	0	657	0	9208600	635	0.00402793	0	627	0	4	3	3	15.7	28.415	255	0	23.872	9208600	4			607
A0A2R8Y7S2;A0A2R8Y4P4;Q9HBD4;A0A0A0MT49;P51532;A0A2R8YGP5;A0A2R8YGG3;A0A2R8Y523;A0A2R8YDA1;A0A2R8Y6V2;A0A2R8Y4C5;A0A2R8YF58;A0A2R8Y526;A0A2R8Y7Y7;A0A2R8YF80;A0A2R8Y6N0;A0A2R8Y7F3;A0A2R8Y440;A0A2R8YG32;A0A0U1RQZ9;F6VDE0;P51531;A0A2R8Y4R6;A0A2R8YFV8;A0A2R8YCY3;A0A2R8Y5K3	Transcription activator BRG1;Probable global transcription activator SNF2L2	SMARCA4;SMARCA2	tr|A0A2R8Y7S2|A0A2R8Y7S2_HUMAN Transcription activator BRG1 OS=Homo sapiens OX=9606 GN=SMARCA4 PE=1 SV=1;tr|A0A2R8Y4P4|A0A2R8Y4P4_HUMAN Transcription activator BRG1 OS=Homo sapiens OX=9606 GN=SMARCA4 PE=1 SV=1;tr|Q9HBD4|Q9HBD4_HUMAN SMARCA4 isoform 2 OS=Ho	68294	611	0.000733394	9184300	636	0.0040173	156410	573	0.00120268	26	4	4	2.7	184.85	1646	0	25.382	9409000	5			58
O95782;A0A0G2JQM1;A0A0G2JS82;O94973	AP-2 complex subunit alpha-1	AP2A1	sp|O95782|AP2A1_HUMAN AP-2 complex subunit alpha-1 OS=Homo sapiens OX=9606 GN=AP2A1 PE=1 SV=3	0	657	0	9158100	637	0.00400584	0	627	0	4	5	5	7.4	107.54	977	0	34.312	9158100	6			570
P23246;H0Y9K7	Splicing factor, proline- and glutamine-rich	SFPQ	sp|P23246|SFPQ_HUMAN Splicing factor, proline- and glutamine-rich OS=Homo sapiens OX=9606 GN=SFPQ PE=1 SV=2	0	657	0	9141300	638	0.0039985	138150	585	0.00106227	2	6	6	11.9	76.149	707	0	37.307	9279500	7			676
K7EIE8;O95983;A0A0A0MTS6;A0A087WT34;A0A087X1H1	Methyl-CpG-binding domain protein 3	MBD3	tr|K7EIE8|K7EIE8_HUMAN Methyl-CpG binding domain protein 3, isoform CRA_b OS=Homo sapiens OX=9606 GN=MBD3 PE=1 SV=1;sp|O95983|MBD3_HUMAN Methyl-CpG-binding domain protein 3 OS=Homo sapiens OX=9606 GN=MBD3 PE=1 SV=1;tr|A0A0A0MTS6|A0A0A0MTS6_HUMAN Methyl-CpG	0	657	0	9059600	639	0.00396276	0	627	0	5	3	3	20	26.322	235	0	31.582	9059600	5			421
H3BQZ7;Q1KMD3	Heterogeneous nuclear ribonucleoprotein U-like protein 2	HNRNPUL2-BSCL2;HNRNPUL2	tr|H3BQZ7|H3BQZ7_HUMAN HCG2044799 OS=Homo sapiens OX=9606 GN=HNRNPUL2-BSCL2 PE=4 SV=1;sp|Q1KMD3|HNRL2_HUMAN Heterogeneous nuclear ribonucleoprotein U-like protein 2 OS=Homo sapiens OX=9606 GN=HNRNPUL2 PE=1 SV=1	0	657	0	9052600	640	0.0039597	0	627	0	2	3	3	5.6	84.69	746	0	71.909	9052600	5			388
P60709;E7EVS6;A0A2R8Y793;A0A6Q8PFE4;G5E9R0;A0A6Q8PH58;A0A2R8YGF8;C9JUM1;C9JZR7;A0A2R8YEA7;C9JTX5;A5A3E0;A0A2R8YFE2;F8WCH0;A0A6Q8PGD7	Actin, cytoplasmic 1;Actin, cytoplasmic 1, N-terminally processed	ACTB	sp|P60709|ACTB_HUMAN Actin, cytoplasmic 1 OS=Homo sapiens OX=9606 GN=ACTB PE=1 SV=1;tr|E7EVS6|E7EVS6_HUMAN Actin, cytoplasmic 1 OS=Homo sapiens OX=9606 GN=ACTB PE=1 SV=9;tr|A0A2R8Y793|A0A2R8Y793_HUMAN Actin, cytoplasmic 1 (Fragment) OS=Homo sapiens OX=9606	1066900	217	0.0114572	9049900	641	0.00395852	3024500	179	0.0232562	15	35	1	90.4	41.736	375	0	146.36	13141000	9			832
O15067;J3KTL4;J3QSG0;J3QSH6;H0YGH1	Phosphoribosylformylglycinamidine synthase	PFAS	sp|O15067|PUR4_HUMAN Phosphoribosylformylglycinamidine synthase OS=Homo sapiens OX=9606 GN=PFAS PE=1 SV=4	0	657	0	9046000	642	0.00395681	0	627	0	5	4	4	4.9	144.73	1338	0	30.676	9046000	5			503
O75083;D6RD66	WD repeat-containing protein 1	WDR1	sp|O75083|WDR1_HUMAN WD repeat-containing protein 1 OS=Homo sapiens OX=9606 GN=WDR1 PE=1 SV=4	0	657	0	9023400	643	0.00394693	260510	511	0.00200313	2	4	4	14.9	66.193	606	0	27.118	9283900	6			539
D3YTB1;F8W727;P62910	60S ribosomal protein L32	RPL32	tr|D3YTB1|D3YTB1_HUMAN 60S ribosomal protein L32 (Fragment) OS=Homo sapiens OX=9606 GN=RPL32 PE=1 SV=1;tr|F8W727|F8W727_HUMAN 60S ribosomal protein L32 OS=Homo sapiens OX=9606 GN=RPL32 PE=1 SV=1;sp|P62910|RL32_HUMAN 60S ribosomal protein L32 OS=Homo sapien	348000	361	0.00373709	9014400	644	0.00394299	261380	510	0.00200982	3	2	2	17.3	15.616	133	0	18.583	9623800	5			245
P30419;K7EN82;B7Z8J4;O60551	Glycylpeptide N-tetradecanoyltransferase 1	NMT1	sp|P30419|NMT1_HUMAN Glycylpeptide N-tetradecanoyltransferase 1 OS=Homo sapiens OX=9606 GN=NMT1 PE=1 SV=2;tr|K7EN82|K7EN82_HUMAN Glycylpeptide N-tetradecanoyltransferase 1 (Fragment) OS=Homo sapiens OX=9606 GN=NMT1 PE=1 SV=1	0	657	0	8980800	645	0.00392829	253590	517	0.00194992	4	4	3	14.5	56.806	496	0	35.097	9234400	8			713
K7EN45;Q13526;K7EMU7	Peptidyl-prolyl cis-trans isomerase NIMA-interacting 1	PIN1	tr|K7EN45|K7EN45_HUMAN Peptidyl-prolyl cis-trans isomerase (Fragment) OS=Homo sapiens OX=9606 GN=PIN1 PE=1 SV=1;sp|Q13526|PIN1_HUMAN Peptidyl-prolyl cis-trans isomerase NIMA-interacting 1 OS=Homo sapiens OX=9606 GN=PIN1 PE=1 SV=1;tr|K7EMU7|K7EMU7_HUMAN Pep	335530	368	0.00360318	8952200	646	0.00391578	0	627	0	3	2	2	33.3	9.8329	90	0	17.495	9287800	8			433
F5GYN4;J3KR44;Q96FW1;F5H6Q1;F5GYJ8;F5H3F0	Ubiquitin thioesterase OTUB1	OTUB1	tr|F5GYN4|F5GYN4_HUMAN Ubiquitinyl hydrolase 1 OS=Homo sapiens OX=9606 GN=OTUB1 PE=1 SV=1;tr|J3KR44|J3KR44_HUMAN Ubiquitin thioesterase OS=Homo sapiens OX=9606 GN=OTUB1 PE=1 SV=2;sp|Q96FW1|OTUB1_HUMAN Ubiquitin thioesterase OTUB1 OS=Homo sapiens OX=9606 GN	86438	582	0.000928238	8918900	647	0.00390122	0	627	0	6	5	5	25.7	28.05	241	0	30.645	9005400	6			316
Q53EL6	Programmed cell death protein 4	PDCD4	sp|Q53EL6|PDCD4_HUMAN Programmed cell death protein 4 OS=Homo sapiens OX=9606 GN=PDCD4 PE=1 SV=2	0	657	0	8884100	648	0.00388599	0	627	0	1	2	2	6.2	51.735	469	0	12.441	8884100	2			1000
Q9NR50;A0A0D9SEN0;H0Y580	Translation initiation factor eIF-2B subunit gamma	EIF2B3	sp|Q9NR50|EI2BG_HUMAN Translation initiation factor eIF-2B subunit gamma OS=Homo sapiens OX=9606 GN=EIF2B3 PE=1 SV=1;tr|A0A0D9SEN0|A0A0D9SEN0_HUMAN Translation initiation factor eIF-2B subunit gamma OS=Homo sapiens OX=9606 GN=EIF2B3 PE=1 SV=1	0	657	0	8840300	649	0.00386684	202590	544	0.00155777	3	3	3	11.3	50.24	452	0	25.229	9042800	6			1168
P27694;I3L4R8;I3L524;I3L2M5	Replication protein A 70 kDa DNA-binding subunit;Replication protein A 70 kDa DNA-binding subunit, N-terminally processed	RPA1	sp|P27694|RFA1_HUMAN Replication protein A 70 kDa DNA-binding subunit OS=Homo sapiens OX=9606 GN=RPA1 PE=1 SV=2;tr|I3L4R8|I3L4R8_HUMAN Replication protein A 70 kDa DNA-binding subunit (Fragment) OS=Homo sapiens OX=9606 GN=RPA1 PE=1 SV=1	80539	593	0.00086489	8787500	650	0.00384374	0	627	0	4	5	5	14.3	68.137	616	0	34.624	8868100	5			699
A8MUD9;P18124;C9JZ88;C9JIJ5	60S ribosomal protein L7	RPL7	tr|A8MUD9|A8MUD9_HUMAN 60S ribosomal protein L7 OS=Homo sapiens OX=9606 GN=RPL7 PE=1 SV=1;sp|P18124|RL7_HUMAN 60S ribosomal protein L7 OS=Homo sapiens OX=9606 GN=RPL7 PE=1 SV=1	389100	344	0.00417846	8763300	651	0.00383315	355910	452	0.00273668	4	4	4	17.8	24.433	208	0	37.79	9508300	9			178
P62854;Q5JNZ5	40S ribosomal protein S26;Putative 40S ribosomal protein S26-like 1	RPS26;RPS26P11	sp|P62854|RS26_HUMAN 40S ribosomal protein S26 OS=Homo sapiens OX=9606 GN=RPS26 PE=1 SV=3;sp|Q5JNZ5|RS26L_HUMAN Putative 40S ribosomal protein S26-like 1 OS=Homo sapiens OX=9606 GN=RPS26P11 PE=5 SV=1	0	657	0	8713400	652	0.00381133	0	627	0	2	2	2	23.5	13.015	115	0	23.995	8713400	3			866
B1AK87;B1AK85;B1AK88;P47756;A0A6I8PRV6	F-actin-capping protein subunit beta	CAPZB	tr|B1AK87|B1AK87_HUMAN F-actin-capping protein subunit beta OS=Homo sapiens OX=9606 GN=CAPZB PE=1 SV=2;tr|B1AK85|B1AK85_HUMAN F-actin-capping protein subunit beta OS=Homo sapiens OX=9606 GN=CAPZB PE=1 SV=1;tr|B1AK88|B1AK88_HUMAN F-actin-capping protein sub	374570	349	0.00402242	8698100	653	0.00380464	381700	435	0.00293499	5	5	5	39.3	27.44	244	0	95.404	9454400	7			184
P11413;E7EUI8;E9PD92;E7EM57	Glucose-6-phosphate 1-dehydrogenase	G6PD	sp|P11413|G6PD_HUMAN Glucose-6-phosphate 1-dehydrogenase OS=Homo sapiens OX=9606 GN=G6PD PE=1 SV=4;tr|E7EUI8|E7EUI8_HUMAN Glucose-6-phosphate 1-dehydrogenase (Fragment) OS=Homo sapiens OX=9606 GN=G6PD PE=1 SV=8;tr|E9PD92|E9PD92_HUMAN Glucose-6-phosphate 1-	0	657	0	8657700	654	0.00378696	0	627	0	4	4	4	11.1	59.256	515	0	29.418	8657700	3			621
Q9BV20	Methylthioribose-1-phosphate isomerase	MRI1	sp|Q9BV20|MTNA_HUMAN Methylthioribose-1-phosphate isomerase OS=Homo sapiens OX=9606 GN=MRI1 PE=1 SV=1	0	657	0	8624800	655	0.00377257	0	627	0	1	2	2	9.8	39.149	369	0	12.425	8624800	2			1134
P54136	Arginine--tRNA ligase, cytoplasmic	RARS	sp|P54136|SYRC_HUMAN Arginine--tRNA ligase, cytoplasmic OS=Homo sapiens OX=9606 GN=RARS1 PE=1 SV=2	0	657	0	8620800	656	0.00377082	153380	575	0.00117938	1	5	5	11.2	75.378	660	0	45.041	8774200	13			818
P34897;H0YIZ0;G3V5L0;G3V2Y4	Serine hydroxymethyltransferase, mitochondrial;Serine hydroxymethyltransferase	SHMT2	sp|P34897|GLYM_HUMAN Serine hydroxymethyltransferase, mitochondrial OS=Homo sapiens OX=9606 GN=SHMT2 PE=1 SV=3;tr|H0YIZ0|H0YIZ0_HUMAN Glycine hydroxymethyltransferase (Fragment) OS=Homo sapiens OX=9606 GN=SHMT2 PE=1 SV=1;tr|G3V5L0|G3V5L0_HUMAN Glycine hydr	165200	486	0.00177405	8573000	657	0.00374992	276700	496	0.00212762	4	4	4	8.5	55.992	504	0	32.851	9014900	4			728
F8VXC8;Q8TAQ2;F8VZW6	SWI/SNF complex subunit SMARCC2	SMARCC2	tr|F8VXC8|F8VXC8_HUMAN SWI/SNF complex subunit SMARCC2 OS=Homo sapiens OX=9606 GN=SMARCC2 PE=1 SV=1;sp|Q8TAQ2|SMRC2_HUMAN SWI/SNF complex subunit SMARCC2 OS=Homo sapiens OX=9606 GN=SMARCC2 PE=1 SV=1	210180	441	0.00225708	8570000	658	0.0037486	820700	323	0.00631057	3	7	5	8.6	136.18	1245	0	103.08	9600800	11			335
P25685;M0R080;M0R1D6;M0QZD0;M0QYT3;M0QXK0	DnaJ homolog subfamily B member 1	DNAJB1	sp|P25685|DNJB1_HUMAN DnaJ homolog subfamily B member 1 OS=Homo sapiens OX=9606 GN=DNAJB1 PE=1 SV=4;tr|M0R080|M0R080_HUMAN DnaJ homolog subfamily B member 1 (Fragment) OS=Homo sapiens OX=9606 GN=DNAJB1 PE=1 SV=1	0	657	0	8562800	659	0.00374545	259860	513	0.00199813	6	4	3	17.1	38.044	340	0	33.234	8822700	5			689
Q13042;Q5T8C6;A0A3B3ISD2	Cell division cycle protein 16 homolog	CDC16	sp|Q13042|CDC16_HUMAN Cell division cycle protein 16 homolog OS=Homo sapiens OX=9606 GN=CDC16 PE=1 SV=2;tr|Q5T8C6|Q5T8C6_HUMAN Cell division cycle protein 16 homolog OS=Homo sapiens OX=9606 GN=CDC16 PE=1 SV=1;tr|A0A3B3ISD2|A0A3B3ISD2_HUMAN Cell division cy	0	657	0	8399600	660	0.00367407	0	627	0	3	4	4	7.3	71.655	620	0	29.699	8399600	6			929
B1AUU8;P42566;S4R3U1	Epidermal growth factor receptor substrate 15	EPS15	tr|B1AUU8|B1AUU8_HUMAN Epidermal growth factor receptor substrate 15 OS=Homo sapiens OX=9606 GN=EPS15 PE=1 SV=1;sp|P42566|EPS15_HUMAN Epidermal growth factor receptor substrate 15 OS=Homo sapiens OX=9606 GN=EPS15 PE=1 SV=2	1012900	227	0.0108773	8357800	661	0.00365578	1140300	281	0.00876806	3	9	9	16.1	83.653	762	0	75.031	10511000	18			186
Q5JRA6;A0A0A0MRH6	Melanoma inhibitory activity protein 3	MIA3	sp|Q5JRA6|TGO1_HUMAN Transport and Golgi organization protein 1 homolog OS=Homo sapiens OX=9606 GN=MIA3 PE=1 SV=1;tr|A0A0A0MRH6|A0A0A0MRH6_HUMAN Transport and Golgi organization protein 1 homolog (Fragment) OS=Homo sapiens OX=9606 GN=MIA3 PE=1 SV=6	0	657	0	8338300	662	0.00364726	0	627	0	2	6	6	5.6	213.7	1907	0	56.022	8338300	8			1004
P62314;J3QLI9;J3QLR7	Small nuclear ribonucleoprotein Sm D1	SNRPD1	sp|P62314|SMD1_HUMAN Small nuclear ribonucleoprotein Sm D1 OS=Homo sapiens OX=9606 GN=SNRPD1 PE=1 SV=1;tr|J3QLI9|J3QLI9_HUMAN Small nuclear ribonucleoprotein Sm D1 OS=Homo sapiens OX=9606 GN=SNRPD1 PE=1 SV=1	131730	523	0.00141462	8337700	663	0.00364699	56370	618	0.000433443	3	4	4	54.6	13.281	119	0	28.616	8525800	6			859
C9JLU1;P52434	DNA-directed RNA polymerases I, II, and III subunit RPABC3	POLR2H	tr|C9JLU1|C9JLU1_HUMAN DNA-directed RNA polymerases I, II, and III subunit RPABC3 (Fragment) OS=Homo sapiens OX=9606 GN=POLR2H PE=1 SV=8;sp|P52434|RPAB3_HUMAN DNA-directed RNA polymerases I, II, and III subunit RPABC3 OS=Homo sapiens OX=9606 GN=POLR2H PE=1	0	657	0	8329700	664	0.00364349	19726	625	0.000151678	2	4	4	41.9	16.925	148	0	39.543	8349400	5			230
I3L0H8;F6QDS0;H3BQK0;Q9NUU7;Q9UMR2;I3L352;H3BN59;H3BMQ5;H3BTB3	ATP-dependent RNA helicase DDX19A;ATP-dependent RNA helicase DDX19B	DDX19A;DDX19B	tr|I3L0H8|I3L0H8_HUMAN ATP-dependent RNA helicase DDX19A OS=Homo sapiens OX=9606 GN=DDX19A PE=1 SV=1;tr|F6QDS0|F6QDS0_HUMAN RNA helicase OS=Homo sapiens OX=9606 GN=hCG_2043426 PE=1 SV=1;tr|H3BQK0|H3BQK0_HUMAN RNA helicase OS=Homo sapiens OX=9606 GN=DDX19B	93169	574	0.00100052	8318100	665	0.00363842	395560	427	0.00304156	9	5	5	19.5	50.519	447	0	48.011	8806900	10			329
P40429;M0QZU1;A0A096LPE0;M0QYS1;Q8J015;Q6NVV1	60S ribosomal protein L13a	RPL13A	sp|P40429|RL13A_HUMAN 60S ribosomal protein L13a OS=Homo sapiens OX=9606 GN=RPL13A PE=1 SV=2;tr|M0QZU1|M0QZU1_HUMAN 60S ribosomal protein L13a OS=Homo sapiens OX=9606 GN=RPL13A PE=1 SV=1;tr|A0A096LPE0|A0A096LPE0_HUMAN 60S ribosomal protein L13a OS=Homo sap	880210	249	0.00945238	8317200	666	0.00363803	358340	448	0.00275537	6	4	4	19.7	23.577	203	0	43.405	9555800	8			749
P23258;Q9NRH3;K7EKE5;K7EIS0	Tubulin gamma-1 chain;Tubulin gamma-2 chain	TUBG1;TUBG2	sp|P23258|TBG1_HUMAN Tubulin gamma-1 chain OS=Homo sapiens OX=9606 GN=TUBG1 PE=1 SV=2;sp|Q9NRH3|TBG2_HUMAN Tubulin gamma-2 chain OS=Homo sapiens OX=9606 GN=TUBG2 PE=2 SV=1	0	657	0	8317200	666	0.00363803	0	627	0	4	4	4	23.3	51.169	451	0	27.309	8317200	6			677
J3KN16;Q5VYK3;R4GMY1;R4GMY3	Proteasome-associated protein ECM29 homolog	KIAA0368;ECM29	tr|J3KN16|J3KN16_HUMAN Proteasome adapter and scaffold protein ECM29 OS=Homo sapiens OX=9606 GN=ECPAS PE=1 SV=1;sp|Q5VYK3|ECM29_HUMAN Proteasome adapter and scaffold protein ECM29 OS=Homo sapiens OX=9606 GN=ECPAS PE=1 SV=2;tr|R4GMY1|R4GMY1_HUMAN Proteasome	74438	600	0.000799373	8316700	668	0.00363781	0	627	0	4	7	7	5	223.69	2017	0	94.335	8391200	9			406
P00374;B4DM58;C9JJ68;Q86XF0	Dihydrofolate reductase	DHFR	sp|P00374|DYR_HUMAN Dihydrofolate reductase OS=Homo sapiens OX=9606 GN=DHFR PE=1 SV=2;tr|B4DM58|B4DM58_HUMAN Dihydrofolate reductase OS=Homo sapiens OX=9606 GN=DHFR PE=1 SV=1	0	657	0	8281700	669	0.0036225	0	627	0	4	5	5	31.6	21.452	187	0	36.824	8281700	6			574
A0A087X2D0;P84103	Serine/arginine-rich splicing factor 3	SRSF3	tr|A0A087X2D0|A0A087X2D0_HUMAN Serine/arginine-rich-splicing factor 3 OS=Homo sapiens OX=9606 GN=SRSF3 PE=1 SV=1;sp|P84103|SRSF3_HUMAN Serine/arginine-rich splicing factor 3 OS=Homo sapiens OX=9606 GN=SRSF3 PE=1 SV=1	843490	255	0.00905805	8262700	670	0.00361419	1467200	249	0.0112817	2	2	2	31.6	10.32	95	0	14.494	10573000	5			45
G3V1J5;Q9Y2L1;F2Z2C0	Exosome complex exonuclease RRP44	DIS3	tr|G3V1J5|G3V1J5_HUMAN Exosome complex exonuclease RRP44 OS=Homo sapiens OX=9606 GN=DIS3 PE=1 SV=1;sp|Q9Y2L1|RRP44_HUMAN Exosome complex exonuclease RRP44 OS=Homo sapiens OX=9606 GN=DIS3 PE=1 SV=2;tr|F2Z2C0|F2Z2C0_HUMAN Exosome complex exonuclease RRP44 OS	0	657	0	8232000	671	0.00360076	0	627	0	3	6	6	11.6	90.583	796	0	39.657	8232000	7			348
O15460	Prolyl 4-hydroxylase subunit alpha-2	P4HA2	sp|O15460|P4HA2_HUMAN Prolyl 4-hydroxylase subunit alpha-2 OS=Homo sapiens OX=9606 GN=P4HA2 PE=1 SV=1	0	657	0	8227800	672	0.00359892	0	627	0	1	2	2	6.4	60.901	535	0	15.822	8227800	3			508
Q13155;A8MU58	Aminoacyl tRNA synthase complex-interacting multifunctional protein 2	AIMP2	sp|Q13155|AIMP2_HUMAN Aminoacyl tRNA synthase complex-interacting multifunctional protein 2 OS=Homo sapiens OX=9606 GN=AIMP2 PE=1 SV=2;tr|A8MU58|A8MU58_HUMAN Aminoacyl tRNA synthase complex-interacting multifunctional protein 2 OS=Homo sapiens OX=9606 GN=A	196180	451	0.00210673	8208900	673	0.00359065	0	627	0	2	3	3	17.2	35.348	320	0	19.76	8405000	7			934
Q86W61;D6RGZ6;E9PF17;P13611	Versican core protein	VCAN	tr|Q86W61|Q86W61_HUMAN VCAN protein OS=Homo sapiens OX=9606 GN=VCAN PE=1 SV=1;tr|D6RGZ6|D6RGZ6_HUMAN Versican core protein (Fragment) OS=Homo sapiens OX=9606 GN=VCAN PE=1 SV=1;tr|E9PF17|E9PF17_HUMAN Versican core protein OS=Homo sapiens OX=9606 GN=VCAN PE=	132000	522	0.00141752	8152500	674	0.00356598	243630	527	0.00187333	4	3	3	16.4	39.264	354	0	19.211	8528100	5			256
Q6PGP7;D6RCE2	Tetratricopeptide repeat protein 37	TTC37	sp|Q6PGP7|TTC37_HUMAN Tetratricopeptide repeat protein 37 OS=Homo sapiens OX=9606 GN=TTC37 PE=1 SV=1;tr|D6RCE2|D6RCE2_HUMAN Tetratricopeptide repeat protein 37 (Fragment) OS=Homo sapiens OX=9606 GN=TTC37 PE=1 SV=1	0	657	0	8145500	675	0.00356292	0	627	0	2	4	4	3.1	175.48	1564	0	25.272	8145500	4			1027
M0R389;Q15102;M0QZT2	Platelet-activating factor acetylhydrolase IB subunit gamma	PAFAH1B3	tr|M0R389|M0R389_HUMAN Platelet-activating factor acetylhydrolase IB subunit alpha1 (Fragment) OS=Homo sapiens OX=9606 GN=PAFAH1B3 PE=1 SV=8;sp|Q15102|PA1B3_HUMAN Platelet-activating factor acetylhydrolase IB subunit alpha1 OS=Homo sapiens OX=9606 GN=PAFAH	0	657	0	8133200	676	0.00355754	0	627	0	3	3	3	25	18.356	164	0	25.127	8133200	3			475
lcl|NC_017825.1_prot_YP_006272978.1_30	E4Orf2	#N/A	lcl|NC_017825.1_prot_YP_006272978.1_30 [locus_tag=YOE_gp30] [db_xref=GeneID:12657134] [protein=E4Orf2] [protein_id=YP_006272978.1] [location=complement(35491..35880)] [gbkey=CDS]	525300	323	0.00564108	8095500	677	0.00354105	977320	298	0.00751486	1	4	4	45	14.698	129	0	70.298	9598200	19			462
Q16186	Proteasomal ubiquitin receptor ADRM1	ADRM1	sp|Q16186|ADRM1_HUMAN Proteasomal ubiquitin receptor ADRM1 OS=Homo sapiens OX=9606 GN=ADRM1 PE=1 SV=2	0	657	0	8074700	678	0.00353195	0	627	0	1	2	2	7.1	42.153	407	0	13.783	8074700	1			988
surface	Surface glycoprotein	S	surface glycoprotein [Severe acute respiratory syndrome coronavirus 2] 1273 aa protein YP_009724390.1 GI:1796318598	1703400	183	0.0182924	8074500	679	0.00353187	1147200	280	0.00882112	1	11	11	11.3	141.18	1273	0	129.77	10925000	17			1263
Q5W0H4;A0A0B4J2C3;P13693	Translationally-controlled tumor protein	TPT1	tr|Q5W0H4|Q5W0H4_HUMAN Translationally-controlled tumor protein OS=Homo sapiens OX=9606 GN=TPT1 PE=1 SV=1;tr|A0A0B4J2C3|A0A0B4J2C3_HUMAN Translationally-controlled tumor protein OS=Homo sapiens OX=9606 GN=TPT1 PE=1 SV=1;sp|P13693|TCTP_HUMAN Translationally	0	657	0	8046700	680	0.00351971	0	627	0	3	1	1	7.4	21.525	188	0.0027881	7.3698	8046700	3			64
E9PQH6;Q5JR08;P08134;Q5JR07;Q5JR05;U3KQA9;U3KQV3	Rho-related GTP-binding protein RhoC	RHOC	tr|E9PQH6|E9PQH6_HUMAN Rho-related GTP-binding protein RhoC (Fragment) OS=Homo sapiens OX=9606 GN=RHOC PE=1 SV=1;tr|Q5JR08|Q5JR08_HUMAN Rho-related GTP-binding protein RhoC (Fragment) OS=Homo sapiens OX=9606 GN=RHOC PE=1 SV=8;sp|P08134|RHOC_HUMAN Rho-relat	323600	380	0.00347507	8045800	681	0.00351931	0	627	0	7	4	1	33.7	19.224	169	0	57.106	8369400	6			309
A0A2R8Y5H3;A0A2U3TZL3;A0A2R8Y7Q9;A0A2R8YEK8;A0A2R8Y5S9;Q9Y5P4;A0A2R8YFA1;A0A2R8YE59;A0A2R8YE18;A0A2R8Y7C5;A0A2R8Y773;H0Y9J1;A0A2R8YCI0;A0A2R8YFI2;A0A2R8YEA4	Collagen type IV alpha-3-binding protein	COL4A3BP	tr|A0A2R8Y5H3|A0A2R8Y5H3_HUMAN Ceramide transfer protein (Fragment) OS=Homo sapiens OX=9606 GN=CERT1 PE=1 SV=1;tr|A0A2U3TZL3|A0A2U3TZL3_HUMAN Ceramide transfer protein (Fragment) OS=Homo sapiens OX=9606 GN=CERT1 PE=1 SV=1;tr|A0A2R8Y7Q9|A0A2R8Y7Q9_HUMAN Cer	0	657	0	7978900	682	0.00349005	0	627	0	15	4	4	10.9	59.269	521	0	39.887	7978900	6			106
E9PLT0;O75534	Cold shock domain-containing protein E1	CSDE1	tr|E9PLT0|E9PLT0_HUMAN Cold shock domain-containing protein E1 OS=Homo sapiens OX=9606 GN=CSDE1 PE=1 SV=1;sp|O75534|CSDE1_HUMAN Cold shock domain-containing protein E1 OS=Homo sapiens OX=9606 GN=CSDE1 PE=1 SV=2	0	657	0	7897200	683	0.00345431	0	627	0	2	4	4	6.6	74.583	668	0	79.095	7897200	6			304
F5GZ28;P18858;M0R0Q7	DNA ligase;DNA ligase 1	LIG1	tr|F5GZ28|F5GZ28_HUMAN DNA ligase OS=Homo sapiens OX=9606 GN=LIG1 PE=1 SV=1;sp|P18858|DNLI1_HUMAN DNA ligase 1 OS=Homo sapiens OX=9606 GN=LIG1 PE=1 SV=1	0	657	0	7884800	684	0.00344889	0	627	0	3	3	3	6.1	93.946	851	0	18.814	7884800	3			317
P48444;Q6P1Q5;B0YIW6;E9PK34	Coatomer subunit delta	ARCN1	sp|P48444|COPD_HUMAN Coatomer subunit delta OS=Homo sapiens OX=9606 GN=ARCN1 PE=1 SV=1;tr|Q6P1Q5|Q6P1Q5_HUMAN Coatomer subunit delta OS=Homo sapiens OX=9606 GN=ARCN1 PE=1 SV=1;tr|B0YIW6|B0YIW6_HUMAN Coatomer subunit delta OS=Homo sapiens OX=9606 GN=ARCN1 P	0	657	0	7826000	685	0.00342317	0	627	0	4	3	3	5.9	57.21	511	0	17.691	7826000	4			777
O75828	Carbonyl reductase [NADPH] 3	CBR3	sp|O75828|CBR3_HUMAN Carbonyl reductase [NADPH] 3 OS=Homo sapiens OX=9606 GN=CBR3 PE=1 SV=3	0	657	0	7825300	686	0.00342286	0	627	0	1	4	2	17.3	30.85	277	0	15.721	7825300	2			553
P62753;A2A3R5;A2A3R7	40S ribosomal protein S6	RPS6	sp|P62753|RS6_HUMAN 40S ribosomal protein S6 OS=Homo sapiens OX=9606 GN=RPS6 PE=1 SV=1;tr|A2A3R5|A2A3R5_HUMAN 40S ribosomal protein S6 OS=Homo sapiens OX=9606 GN=RPS6 PE=1 SV=1	913270	239	0.0098074	7815200	687	0.00341845	252060	519	0.00193815	3	7	7	32.1	28.68	249	0	218.74	8980500	12			863
O14828	Secretory carrier-associated membrane protein 3	SCAMP3	sp|O14828|SCAM3_HUMAN Secretory carrier-associated membrane protein 3 OS=Homo sapiens OX=9606 GN=SCAMP3 PE=1 SV=3	615390	292	0.00660853	7805000	688	0.00341398	672720	363	0.00517272	1	4	4	17.9	38.287	347	0	52.988	9093100	7			497
O94763;I3L2V7;I3L104;I3NI51	Unconventional prefoldin RPB5 interactor 1	URI1	sp|O94763|RMP_HUMAN Unconventional prefoldin RPB5 interactor 1 OS=Homo sapiens OX=9606 GN=URI1 PE=1 SV=3;tr|I3L2V7|I3L2V7_HUMAN Unconventional prefoldin RPB5 interactor 1 (Fragment) OS=Homo sapiens OX=9606 GN=URI1 PE=1 SV=1;tr|I3L104|I3L104_HUMAN Unconvent	0	657	0	7783200	689	0.00340445	270340	502	0.00207871	4	2	2	6	59.832	535	0	12.455	8053500	4			559
Q5VSL9;Q9ULQ0	Striatin-interacting protein 1;Striatin-interacting protein 2	STRIP1;STRIP2	sp|Q5VSL9|STRP1_HUMAN Striatin-interacting protein 1 OS=Homo sapiens OX=9606 GN=STRIP1 PE=1 SV=1;sp|Q9ULQ0|STRP2_HUMAN Striatin-interacting protein 2 OS=Homo sapiens OX=9606 GN=STRIP2 PE=1 SV=2	0	657	0	7727000	690	0.00337987	0	627	0	2	4	4	4.4	95.575	837	0	25.296	7727000	6			1017
P61289;K7ESG5;K9J957;A0A087WTV2;B3KQ25;K7ENH2;K7EPX6;K7EKR3;K7EMD0;B7Z8D3;K7EJF8	Proteasome activator complex subunit 3	PSME3	sp|P61289|PSME3_HUMAN Proteasome activator complex subunit 3 OS=Homo sapiens OX=9606 GN=PSME3 PE=1 SV=1;tr|K7ESG5|K7ESG5_HUMAN Proteasome activator complex subunit 3 OS=Homo sapiens OX=9606 GN=PSME3 PE=1 SV=1;tr|K9J957|K9J957_HUMAN Proteasome activator com	6716400	96	0.0721259	7723400	691	0.00337829	3311700	171	0.0254645	11	11	11	49.6	29.506	254	0	135.97	17751000	26			843
D6R9C3;D6RIE3;D6RGV5;H0UI06;P14406	Cytochrome c oxidase subunit 7A2, mitochondrial	COX7A2	tr|D6R9C3|D6R9C3_HUMAN Cytochrome c oxidase subunit 7A2, mitochondrial OS=Homo sapiens OX=9606 GN=COX7A2 PE=1 SV=1;tr|D6RIE3|D6RIE3_HUMAN Cytochrome c oxidase subunit 7A2, mitochondrial OS=Homo sapiens OX=9606 GN=COX7A2 PE=1 SV=1;tr|D6RGV5|D6RGV5_HUMAN Cyt	0	657	0	7672200	692	0.0033559	0	627	0	5	1	1	18.9	5.8468	53	0.0028195	7.6163	7672200	2			248
B1AJY7;O75832;B1AJY5;B1AJY6	26S proteasome non-ATPase regulatory subunit 10	PSMD10	tr|B1AJY7|B1AJY7_HUMAN 26S proteasome non-ATPase regulatory subunit 10 OS=Homo sapiens OX=9606 GN=PSMD10 PE=1 SV=1;sp|O75832|PSD10_HUMAN 26S proteasome non-ATPase regulatory subunit 10 OS=Homo sapiens OX=9606 GN=PSMD10 PE=1 SV=1;tr|B1AJY5|B1AJY5_HUMAN 26S	94537	573	0.00101521	7656600	693	0.00334907	160020	572	0.00123043	4	4	4	36.3	20.808	193	0	29.144	7911100	4			183
Q0VDF9	Heat shock 70 kDa protein 14	HSPA14	sp|Q0VDF9|HSP7E_HUMAN Heat shock 70 kDa protein 14 OS=Homo sapiens OX=9606 GN=HSPA14 PE=1 SV=1	0	657	0	7576600	694	0.00331408	0	627	0	1	2	2	6.7	54.794	509	0	11.889	7576600	2			919
E7EPB3;P50914	60S ribosomal protein L14	RPL14	tr|E7EPB3|E7EPB3_HUMAN 60S ribosomal protein L14 OS=Homo sapiens OX=9606 GN=RPL14 PE=1 SV=1;sp|P50914|RL14_HUMAN 60S ribosomal protein L14 OS=Homo sapiens OX=9606 GN=RPL14 PE=1 SV=4	278440	401	0.0029901	7564900	695	0.00330896	1087500	288	0.00836207	2	5	5	33.9	14.558	124	0	38.341	8930800	9			269
U3KQ56;Q9UBQ7	Glyoxylate reductase/hydroxypyruvate reductase	GRHPR	tr|U3KQ56|U3KQ56_HUMAN Glyoxylate reductase/hydroxypyruvate reductase OS=Homo sapiens OX=9606 GN=GRHPR PE=1 SV=1;sp|Q9UBQ7|GRHPR_HUMAN Glyoxylate reductase/hydroxypyruvate reductase OS=Homo sapiens OX=9606 GN=GRHPR PE=1 SV=1	0	657	0	7551000	696	0.00330288	0	627	0	2	1	1	6.7	38.695	358	0.0029098	9.2372	7551000	3			1194
Q9HCN4;F8WD09	GPN-loop GTPase 1	GPN1	sp|Q9HCN4|GPN1_HUMAN GPN-loop GTPase 1 OS=Homo sapiens OX=9606 GN=GPN1 PE=1 SV=1	0	657	0	7517100	697	0.00328805	0	627	0	2	3	3	13.9	41.74	374	0	16.974	7517100	3			1163
O76071	Probable cytosolic iron-sulfur protein assembly protein CIAO1	CIAO1	sp|O76071|CIAO1_HUMAN Probable cytosolic iron-sulfur protein assembly protein CIAO1 OS=Homo sapiens OX=9606 GN=CIAO1 PE=1 SV=1	0	657	0	7496700	698	0.00327913	0	627	0	1	3	3	18.9	37.84	339	0	21.644	7496700	6			557
C9J931;Q15382;C9J469	GTP-binding protein Rheb	RHEB	tr|C9J931|C9J931_HUMAN GTP-binding protein Rheb OS=Homo sapiens OX=9606 GN=RHEB PE=1 SV=1;sp|Q15382|RHEB_HUMAN GTP-binding protein Rheb OS=Homo sapiens OX=9606 GN=RHEB PE=1 SV=1;tr|C9J469|C9J469_HUMAN GTP-binding protein Rheb (Fragment) OS=Homo sapiens OX=	0	657	0	7210900	699	0.00315412	0	627	0	3	2	2	35.4	8.6739	79	0	12.197	7210900	2			220
D3DTZ5;J3QSB9;P63272	Transcription elongation factor SPT4	SUPT4H1	tr|D3DTZ5|D3DTZ5_HUMAN Suppressor of Ty 4 homolog 1 (S. cerevisiae), isoform CRA_b OS=Homo sapiens OX=9606 GN=SUPT4H1 PE=1 SV=1;tr|J3QSB9|J3QSB9_HUMAN Transcription elongation factor SPT4 OS=Homo sapiens OX=9606 GN=SUPT4H1 PE=1 SV=1;sp|P63272|SPT4H_HUMAN T	0	657	0	7178100	700	0.00313977	289650	488	0.00222719	3	1	1	21.1	8.5057	76	0.0052356	6.4834	7467800	3			244
P27695	DNA-(apurinic or apyrimidinic site) lyase;DNA-(apurinic or apyrimidinic site) lyase, mitochondrial	APEX1	sp|P27695|APEX1_HUMAN DNA-(apurinic or apyrimidinic site) endonuclease OS=Homo sapiens OX=9606 GN=APEX1 PE=1 SV=2	0	657	0	7155300	701	0.0031298	0	627	0	1	1	1	6.3	35.554	318	1	-2	7155300	0	+		700
P46063;F5H2L2;F8WA66;F8WD97	ATP-dependent DNA helicase Q1	RECQL	sp|P46063|RECQ1_HUMAN ATP-dependent DNA helicase Q1 OS=Homo sapiens OX=9606 GN=RECQL PE=1 SV=3;tr|F5H2L2|F5H2L2_HUMAN ATP-dependent DNA helicase Q1 (Fragment) OS=Homo sapiens OX=9606 GN=RECQL PE=1 SV=1;tr|F8WA66|F8WA66_HUMAN ATP-dependent DNA helicase Q1 (	0	657	0	7132700	702	0.00311991	0	627	0	4	2	2	3.5	73.457	649	0	11.796	7132700	3			766
B5MC59;P35244	Replication protein A 14 kDa subunit	RPA3	tr|B5MC59|B5MC59_HUMAN Replication protein A 14 kDa subunit OS=Homo sapiens OX=9606 GN=RPA3 PE=1 SV=1;sp|P35244|RFA3_HUMAN Replication protein A 14 kDa subunit OS=Homo sapiens OX=9606 GN=RPA3 PE=1 SV=1	341410	362	0.00366633	7109500	703	0.00310977	379790	437	0.0029203	2	1	1	20.7	9.1703	82	0.0028958	8.7757	7830700	3			195
Q9H1E5;E9PIN7	Thioredoxin-related transmembrane protein 4	TMX4	sp|Q9H1E5|TMX4_HUMAN Thioredoxin-related transmembrane protein 4 OS=Homo sapiens OX=9606 GN=TMX4 PE=1 SV=1	131110	524	0.00140796	7105300	704	0.00310793	168410	570	0.00129495	2	5	5	18.3	38.952	349	0	44.57	7404900	10			1148
H3BLU7;O43488;A0A499FJT0;Q8NHP1	Aflatoxin B1 aldehyde reductase member 2	AKR7A2	tr|H3BLU7|H3BLU7_HUMAN Aflatoxin B1 aldehyde reductase member 2 (Fragment) OS=Homo sapiens OX=9606 GN=AKR7A2 PE=1 SV=1;sp|O43488|ARK72_HUMAN Aflatoxin B1 aldehyde reductase member 2 OS=Homo sapiens OX=9606 GN=AKR7A2 PE=1 SV=3	0	657	0	7086700	705	0.00309979	0	627	0	4	3	3	14.3	34.684	314	0	17.633	7086700	3			383
P43897;C9JT21	Elongation factor Ts, mitochondrial	TSFM	sp|P43897|EFTS_HUMAN Elongation factor Ts, mitochondrial OS=Homo sapiens OX=9606 GN=TSFM PE=1 SV=2	0	657	0	7077900	706	0.00309594	0	627	0	2	3	3	15.7	35.39	325	0	73.917	7077900	3			762
Q9NVJ2;Q96BM9	ADP-ribosylation factor-like protein 8B;ADP-ribosylation factor-like protein 8A	ARL8B;ARL8A	sp|Q9NVJ2|ARL8B_HUMAN ADP-ribosylation factor-like protein 8B OS=Homo sapiens OX=9606 GN=ARL8B PE=1 SV=1;sp|Q96BM9|ARL8A_HUMAN ADP-ribosylation factor-like protein 8A OS=Homo sapiens OX=9606 GN=ARL8A PE=1 SV=1	0	657	0	7041000	707	0.0030798	0	627	0	2	2	2	12.9	21.539	186	0	13.391	7041000	2			1097
E9PF58;A0A1W2PNV4;Q92747;F8WFD3;C9JEY1;C9K057;O15143	Actin-related protein 2/3 complex subunit 1A;Actin-related protein 2/3 complex subunit 1B	ARPC1A;ARPC1B	tr|E9PF58|E9PF58_HUMAN Actin-related protein 2/3 complex subunit 1A OS=Homo sapiens OX=9606 GN=ARPC1A PE=1 SV=1;tr|A0A1W2PNV4|A0A1W2PNV4_HUMAN Uncharacterized protein OS=Homo sapiens OX=9606 PE=3 SV=1;sp|Q92747|ARC1A_HUMAN Actin-related protein 2/3 complex	154010	497	0.00165388	6960500	708	0.00304459	0	627	0	7	2	2	14.3	30.888	279	0	11.874	7114500	3			91
E7EVX8;Q8WWY3;E7EU94;E7ESX0;E7EN72	U4/U6 small nuclear ribonucleoprotein Prp31	PRPF31	tr|E7EVX8|E7EVX8_HUMAN Pre-mRNA-processing factor 31 OS=Homo sapiens OX=9606 GN=PRPF31 PE=1 SV=1;sp|Q8WWY3|PRP31_HUMAN U4/U6 small nuclear ribonucleoprotein Prp31 OS=Homo sapiens OX=9606 GN=PRPF31 PE=1 SV=2;tr|E7EU94|E7EU94_HUMAN U4/U6 small nuclear ribonu	0	657	0	6957200	709	0.00304315	0	627	0	5	3	3	7.9	54.766	493	0	18.877	6957200	3			280
A0A087WUI2;P22626	Heterogeneous nuclear ribonucleoproteins A2/B1	HNRNPA2B1	tr|A0A087WUI2|A0A087WUI2_HUMAN Heterogeneous nuclear ribonucleoproteins A2/B1 OS=Homo sapiens OX=9606 GN=HNRNPA2B1 PE=1 SV=1;sp|P22626|ROA2_HUMAN Heterogeneous nuclear ribonucleoproteins A2/B1 OS=Homo sapiens OX=9606 GN=HNRNPA2B1 PE=1 SV=2	0	657	0	6931400	710	0.00303186	0	627	0	2	2	2	12.3	29.836	261	0	18.025	6931400	3			17
O60684;O15131;Q5TFJ7	Importin subunit alpha-7;Importin subunit alpha-6	KPNA6;KPNA5	sp|O60684|IMA7_HUMAN Importin subunit alpha-7 OS=Homo sapiens OX=9606 GN=KPNA6 PE=1 SV=1;sp|O15131|IMA6_HUMAN Importin subunit alpha-6 OS=Homo sapiens OX=9606 GN=KPNA5 PE=1 SV=2;tr|Q5TFJ7|Q5TFJ7_HUMAN Importin subunit alpha-7 (Fragment) OS=Homo sapiens OX=	0	657	0	6923500	711	0.00302841	0	627	0	3	3	3	11.8	60.029	536	0	63.07	6923500	4			504
X1WI22;D6RAA2;Q5SQT8;D6RDB2;D6RD69;Q9Y6B6;Q9NR31	GTP-binding protein SAR1b;GTP-binding protein SAR1a	SAR1A;SAR1B	tr|X1WI22|X1WI22_HUMAN GTP-binding protein SAR1a (Fragment) OS=Homo sapiens OX=9606 GN=SAR1A PE=1 SV=7;tr|D6RAA2|D6RAA2_HUMAN GTP-binding protein SAR1b (Fragment) OS=Homo sapiens OX=9606 GN=SAR1B PE=1 SV=1;tr|Q5SQT8|Q5SQT8_HUMAN GTP-binding protein SAR1a O	0	657	0	6867400	712	0.00300387	0	627	0	7	1	1	22	5.7567	50	0.0028902	8.7314	6867400	2			250
O95376	E3 ubiquitin-protein ligase ARIH2	ARIH2	sp|O95376|ARI2_HUMAN E3 ubiquitin-protein ligase ARIH2 OS=Homo sapiens OX=9606 GN=ARIH2 PE=1 SV=1	0	657	0	6837100	713	0.00299062	0	627	0	1	3	3	7.7	57.818	493	0	26.744	6837100	3			568
Q12789;H3BRD0;H3BU37	General transcription factor 3C polypeptide 1	GTF3C1	sp|Q12789|TF3C1_HUMAN General transcription factor 3C polypeptide 1 OS=Homo sapiens OX=9606 GN=GTF3C1 PE=1 SV=4;tr|H3BRD0|H3BRD0_HUMAN General transcription factor 3C polypeptide 1 (Fragment) OS=Homo sapiens OX=9606 GN=GTF3C1 PE=1 SV=8	0	657	0	6761700	714	0.00295763	0	627	0	3	4	4	2.2	238.87	2109	0	26.612	6761700	6			922
S4R3N1;Q9Y3A3;B4DM50	MOB-like protein phocein	HSPE1-MOB4;MOB4	tr|S4R3N1|S4R3N1_HUMAN 10 kDa heat shock protein, mitochondrial OS=Homo sapiens OX=9606 GN=HSPE1-MOB4 PE=1 SV=1;sp|Q9Y3A3|PHOCN_HUMAN MOB-like protein phocein OS=Homo sapiens OX=9606 GN=MOB4 PE=1 SV=1;tr|B4DM50|B4DM50_HUMAN MOB-like protein phocein OS=Homo	0	657	0	6739400	715	0.00294788	413750	419	0.00318143	3	4	4	15.7	29.736	261	0	26.437	7153100	5			1230
Q9NZT2;A0A087X028;A0A0A0MRN5;Q4VXW3	Opioid growth factor receptor	OGFR	sp|Q9NZT2|OGFR_HUMAN Opioid growth factor receptor OS=Homo sapiens OX=9606 GN=OGFR PE=1 SV=3;tr|A0A087X028|A0A087X028_HUMAN Opioid growth factor receptor OS=Homo sapiens OX=9606 GN=OGFR PE=1 SV=1;tr|A0A0A0MRN5|A0A0A0MRN5_HUMAN Opioid growth factor receptor	172600	472	0.00185351	6717500	716	0.0029383	239230	529	0.0018395	4	5	5	13.6	73.324	677	0	28.16	7129300	5			1185
A0A3B3IUB1;Q13144;A0A3B3IST9;A0A3B3ISI2;A0A3B3ISS1;A0A3B3IS56;A0A3B3ISV1;A0A3B3IRP4;A0A3B3ITQ2;A0A3B3IUF2;A0A3B3ISM8;A0A3B3ISX3;A0A3B3ITG6;A0A3B3ITK8	Translation initiation factor eIF-2B subunit epsilon	EIF2B5	tr|A0A3B3IUB1|A0A3B3IUB1_HUMAN eIF-2B GDP-GTP exchange factor subunit epsilon OS=Homo sapiens OX=9606 GN=EIF2B5 PE=1 SV=1;sp|Q13144|EI2BE_HUMAN Translation initiation factor eIF-2B subunit epsilon OS=Homo sapiens OX=9606 GN=EIF2B5 PE=1 SV=3;tr|A0A3B3IST9|A	0	657	0	6691200	717	0.0029268	0	627	0	14	4	4	9.7	81.222	729	0	36.577	6691200	6			132
Q9NWV8;M0QYV1;M0R3F4;M0R2A4;M0R2K3;M0R193;M0R0I0;M0R2I2;J3KQS6	BRISC and BRCA1-A complex member 1	BABAM1	sp|Q9NWV8|BABA1_HUMAN BRISC and BRCA1-A complex member 1 OS=Homo sapiens OX=9606 GN=BABAM1 PE=1 SV=1;tr|M0QYV1|M0QYV1_HUMAN BRISC and BRCA1-A complex member 1 (Fragment) OS=Homo sapiens OX=9606 GN=BABAM1 PE=1 SV=1;tr|M0R3F4|M0R3F4_HUMAN BRISC and BRCA1-A c	0	657	0	6689600	718	0.0029261	271010	499	0.00208387	9	2	2	7.6	36.56	329	0	11.718	6960600	3			1177
A0A087X0M4;Q9BWU0;H7C256	Kanadaptin	SLC4A1AP	tr|A0A087X0M4|A0A087X0M4_HUMAN Kanadaptin OS=Homo sapiens OX=9606 GN=SLC4A1AP PE=1 SV=1;sp|Q9BWU0|NADAP_HUMAN Kanadaptin OS=Homo sapiens OX=9606 GN=SLC4A1AP PE=1 SV=1	0	657	0	6663200	719	0.00291455	0	627	0	3	3	3	6.6	82.89	742	0	20.511	6663200	4			40
I3L1L3;Q9BQG0	Myb-binding protein 1A	MYBBP1A	tr|I3L1L3|I3L1L3_HUMAN Myb-binding protein 1A (Fragment) OS=Homo sapiens OX=9606 GN=MYBBP1A PE=1 SV=1;sp|Q9BQG0|MBB1A_HUMAN Myb-binding protein 1A OS=Homo sapiens OX=9606 GN=MYBBP1A PE=1 SV=2	0	657	0	6620700	720	0.00289596	0	627	0	2	4	4	4.8	140.13	1252	0	26.157	6620700	4			402
Q9NQC3	Reticulon-4	RTN4	sp|Q9NQC3|RTN4_HUMAN Reticulon-4 OS=Homo sapiens OX=9606 GN=RTN4 PE=1 SV=2	854270	252	0.00917381	6607800	721	0.00289032	1151700	279	0.00885572	1	7	1	12	129.93	1192	0.002765	7.1642	8613800	4			1166
Q8IYS1	Peptidase M20 domain-containing protein 2	PM20D2	sp|Q8IYS1|P20D2_HUMAN Peptidase M20 domain-containing protein 2 OS=Homo sapiens OX=9606 GN=PM20D2 PE=1 SV=2	534510	321	0.00573998	6600300	722	0.00288704	0	627	0	1	4	4	18.8	47.776	436	0	25.865	7134800	5			1054
P51151;A0A1B0GUI0;Q9NP90	Ras-related protein Rab-9A;Ras-related protein Rab-9B	RAB9A;RAB9B	sp|P51151|RAB9A_HUMAN Ras-related protein Rab-9A OS=Homo sapiens OX=9606 GN=RAB9A PE=1 SV=1;tr|A0A1B0GUI0|A0A1B0GUI0_HUMAN Ras-related protein Rab-9A (Fragment) OS=Homo sapiens OX=9606 GN=RAB9A PE=4 SV=1;sp|Q9NP90|RAB9B_HUMAN Ras-related protein Rab-9B OS=	65048	617	0.000698536	6593500	723	0.00288406	0	627	0	3	2	2	13.4	22.837	201	0	12.918	6658600	3			796
Q13885	Tubulin beta-2A chain	TUBB2A	sp|Q13885|TBB2A_HUMAN Tubulin beta-2A chain OS=Homo sapiens OX=9606 GN=TUBB2A PE=1 SV=1	0	657	0	6587300	724	0.00288135	779160	331	0.00599116	1	34	2	71.7	49.906	445	0	49.133	7366400	4			949
Q9Y696	Chloride intracellular channel protein 4	CLIC4	sp|Q9Y696|CLIC4_HUMAN Chloride intracellular channel protein 4 OS=Homo sapiens OX=9606 GN=CLIC4 PE=1 SV=4	0	657	0	6583000	725	0.00287947	0	627	0	1	3	3	22.5	28.772	253	0	27.318	6583000	3			1245
O14802	DNA-directed RNA polymerase III subunit RPC1	POLR3A	sp|O14802|RPC1_HUMAN DNA-directed RNA polymerase III subunit RPC1 OS=Homo sapiens OX=9606 GN=POLR3A PE=1 SV=2	0	657	0	6559400	726	0.00286915	0	627	0	1	4	4	5.8	155.64	1390	0	44.301	6559400	7			495
Q9BXP5;H7C3A1;H7C1K0	Serrate RNA effector molecule homolog	SRRT	sp|Q9BXP5|SRRT_HUMAN Serrate RNA effector molecule homolog OS=Homo sapiens OX=9606 GN=SRRT PE=1 SV=1;tr|H7C3A1|H7C3A1_HUMAN Arsenite-resistance protein 2 (Fragment) OS=Homo sapiens OX=9606 GN=SRRT PE=1 SV=1	0	657	0	6548900	727	0.00286455	0	627	0	3	3	3	5.1	100.67	876	0	18.424	6548900	4			1141
Q5VWZ2	Lysophospholipase-like protein 1	LYPLAL1	sp|Q5VWZ2|LYPL1_HUMAN Lysophospholipase-like protein 1 OS=Homo sapiens OX=9606 GN=LYPLAL1 PE=1 SV=3	0	657	0	6532100	728	0.00285721	0	627	0	1	3	3	24.5	26.316	237	0	30.471	6532100	6			1019
A0A0C4DFL7;Q16850;H7C0D0	Lanosterol 14-alpha demethylase	CYP51A1	tr|A0A0C4DFL7|A0A0C4DFL7_HUMAN Lanosterol 14-alpha demethylase OS=Homo sapiens OX=9606 GN=CYP51A1 PE=1 SV=1;sp|Q16850|CP51A_HUMAN Lanosterol 14-alpha demethylase OS=Homo sapiens OX=9606 GN=CYP51A1 PE=1 SV=3	0	657	0	6476700	729	0.00283297	0	627	0	3	4	4	10.8	57.278	509	0	24.702	6476700	6			66
Q15477;H7C5N0;B4E0B4	Helicase SKI2W	SKIV2L	sp|Q15477|SKIV2_HUMAN Helicase SKI2W OS=Homo sapiens OX=9606 GN=SKIV2L PE=1 SV=3;tr|H7C5N0|H7C5N0_HUMAN Helicase SKI2W (Fragment) OS=Homo sapiens OX=9606 GN=SKIV2L PE=1 SV=1;tr|B4E0B4|B4E0B4_HUMAN Helicase SKI2W OS=Homo sapiens OX=9606 GN=SKIV2L PE=1 SV=1	144430	508	0.001551	6427700	730	0.00281154	0	627	0	3	2	2	3.5	137.75	1246	0	12.273	6572200	3			981
A0A2R8Y7W8;A0A2R8Y6W5;Q16626	Male-enhanced antigen 1	MEA1	tr|A0A2R8Y7W8|A0A2R8Y7W8_HUMAN Male-enhanced antigen 1 OS=Homo sapiens OX=9606 GN=MEA1 PE=1 SV=1;tr|A0A2R8Y6W5|A0A2R8Y6W5_HUMAN Male-enhanced antigen 1 OS=Homo sapiens OX=9606 GN=MEA1 PE=1 SV=1;sp|Q16626|MEA1_HUMAN Male-enhanced antigen 1 OS=Homo sapiens O	306740	388	0.00329401	6424900	731	0.00281032	805880	324	0.00619662	3	2	2	17.4	18.544	172	0	68.769	7537500	8			110
Q9UBS4;H7C2Y5	DnaJ homolog subfamily B member 11	DNAJB11	sp|Q9UBS4|DJB11_HUMAN DnaJ homolog subfamily B member 11 OS=Homo sapiens OX=9606 GN=DNAJB11 PE=1 SV=1;tr|H7C2Y5|H7C2Y5_HUMAN DnaJ_C domain-containing protein (Fragment) OS=Homo sapiens OX=9606 PE=1 SV=8	0	657	0	6410800	732	0.00280415	0	627	0	2	2	2	8.4	40.513	358	0	12.718	6410800	2			1195
P61353;K7ELC7;K7EQQ9;K7ERY7	60S ribosomal protein L27	RPL27	sp|P61353|RL27_HUMAN 60S ribosomal protein L27 OS=Homo sapiens OX=9606 GN=RPL27 PE=1 SV=2;tr|K7ELC7|K7ELC7_HUMAN 60S ribosomal protein L27 (Fragment) OS=Homo sapiens OX=9606 GN=RPL27 PE=1 SV=1	273850	406	0.00294081	6390000	733	0.00279505	458070	409	0.00352222	4	4	4	30.1	15.798	136	0	24.292	7121900	5			844
P46940;A0A0J9YXZ5;H0YLE8;A0A087WWP1;E9PDT6;E7EWC2;F5H7S7;F2Z2E2;Q13576;Q86VI3	Ras GTPase-activating-like protein IQGAP1	IQGAP1	sp|P46940|IQGA1_HUMAN Ras GTPase-activating-like protein IQGAP1 OS=Homo sapiens OX=9606 GN=IQGAP1 PE=1 SV=1;tr|A0A0J9YXZ5|A0A0J9YXZ5_HUMAN Ras GTPase-activating-like protein IQGAP1 OS=Homo sapiens OX=9606 GN=IQGAP1 PE=1 SV=1;tr|H0YLE8|H0YLE8_HUMAN Ras GTPa	463270	332	0.00497495	6371700	734	0.00278705	672510	365	0.0051711	10	8	8	7.6	189.25	1657	0	52.341	7507400	12			772
J3KMX5;P62277	40S ribosomal protein S13	RPS13	tr|J3KMX5|J3KMX5_HUMAN 40S ribosomal protein S13 OS=Homo sapiens OX=9606 GN=RPS13 PE=1 SV=1;sp|P62277|RS13_HUMAN 40S ribosomal protein S13 OS=Homo sapiens OX=9606 GN=RPS13 PE=1 SV=2	123290	536	0.00132398	6279200	735	0.00274658	333620	461	0.00256529	2	2	2	18.9	16.733	148	0	14.43	6736100	5			405
A0A087X054;A0A494C039;Q9Y4L1	Hypoxia up-regulated protein 1	HYOU1	tr|A0A087X054|A0A087X054_HUMAN Hypoxia up-regulated protein 1 OS=Homo sapiens OX=9606 GN=HYOU1 PE=1 SV=1;tr|A0A494C039|A0A494C039_HUMAN Hypoxia up-regulated protein 1 OS=Homo sapiens OX=9606 GN=HYOU1 PE=1 SV=1;sp|Q9Y4L1|HYOU1_HUMAN Hypoxia up-regulated pro	55500	633	0.000596002	6260900	736	0.00273858	0	627	0	3	2	2	2.9	104.78	937	0	12.517	6316400	3			39
Q12931	Heat shock protein 75 kDa, mitochondrial	TRAP1	sp|Q12931|TRAP1_HUMAN Heat shock protein 75 kDa, mitochondrial OS=Homo sapiens OX=9606 GN=TRAP1 PE=1 SV=3	0	657	0	6251500	737	0.00273447	238440	530	0.00183343	1	2	2	2	80.109	704	0	18.385	6489900	2			927
B7Z7P8;P62495;D6RCB3;D6RJE8;I3L492	Eukaryotic peptide chain release factor subunit 1	ETF1	tr|B7Z7P8|B7Z7P8_HUMAN Eukaryotic peptide chain release factor subunit 1 OS=Homo sapiens OX=9606 GN=ETF1 PE=1 SV=1;sp|P62495|ERF1_HUMAN Eukaryotic peptide chain release factor subunit 1 OS=Homo sapiens OX=9606 GN=ETF1 PE=1 SV=3;tr|D6RCB3|D6RCB3_HUMAN Eukar	0	657	0	6243600	738	0.00273101	0	627	0	5	2	2	5.7	47.475	423	0	14.68	6243600	2			205
X6RFL8;P61106	Ras-related protein Rab-14	RAB14	tr|X6RFL8|X6RFL8_HUMAN Ras-related protein Rab-14 (Fragment) OS=Homo sapiens OX=9606 GN=RAB14 PE=1 SV=1;sp|P61106|RAB14_HUMAN Ras-related protein Rab-14 OS=Homo sapiens OX=9606 GN=RAB14 PE=1 SV=4	0	657	0	6186000	739	0.00270582	0	627	0	2	3	3	21.5	20.409	181	0	18.426	6186000	3			838
P19525	Interferon-induced, double-stranded RNA-activated protein kinase	EIF2AK2	sp|P19525|E2AK2_HUMAN Interferon-induced, double-stranded RNA-activated protein kinase OS=Homo sapiens OX=9606 GN=EIF2AK2 PE=1 SV=2	0	657	0	6152700	740	0.00269125	0	627	0	1	2	2	4.7	62.094	551	0	29.63	6152700	4			660
A0A1C7CYX9;Q16555	Dihydropyrimidinase-related protein 2	DPYSL2	tr|A0A1C7CYX9|A0A1C7CYX9_HUMAN Dihydropyrimidinase-related protein 2 OS=Homo sapiens OX=9606 GN=DPYSL2 PE=1 SV=1;sp|Q16555|DPYL2_HUMAN Dihydropyrimidinase-related protein 2 OS=Homo sapiens OX=9606 GN=DPYSL2 PE=1 SV=1	0	657	0	6106500	741	0.00267104	0	627	0	2	3	2	9	73.502	677	0	21.168	6106500	6			90
P63208;E5RJR5;E7ERH2;F8W8N3	S-phase kinase-associated protein 1	SKP1	sp|P63208|SKP1_HUMAN S-phase kinase-associated protein 1 OS=Homo sapiens OX=9606 GN=SKP1 PE=1 SV=2;tr|E5RJR5|E5RJR5_HUMAN S-phase kinase-associated protein 1 OS=Homo sapiens OX=9606 GN=SKP1 PE=1 SV=1;tr|E7ERH2|E7ERH2_HUMAN Cyclin-A/CDK2-associated protein	215290	436	0.00231195	6022700	742	0.00263439	251600	520	0.00193462	4	4	4	27	18.658	163	0	74.634	6489600	10			877
P49207	60S ribosomal protein L34	RPL34	sp|P49207|RL34_HUMAN 60S ribosomal protein L34 OS=Homo sapiens OX=9606 GN=RPL34 PE=1 SV=3	0	657	0	5981100	743	0.00261619	0	627	0	1	2	2	10.3	13.293	117	0	15.586	5981100	2			780
O43681	ATPase ASNA1	ASNA1	sp|O43681|GET3_HUMAN ATPase GET3 OS=Homo sapiens OX=9606 GN=GET3 PE=1 SV=2	153010	500	0.00164314	5966700	744	0.00260989	0	627	0	1	3	3	11.2	38.792	348	0	17.641	6119700	3			515
O76094;D6RDY6	Signal recognition particle subunit SRP72	SRP72	sp|O76094|SRP72_HUMAN Signal recognition particle subunit SRP72 OS=Homo sapiens OX=9606 GN=SRP72 PE=1 SV=3;tr|D6RDY6|D6RDY6_HUMAN Signal recognition particle subunit SRP72 (Fragment) OS=Homo sapiens OX=9606 GN=SRP72 PE=1 SV=3	0	657	0	5940300	745	0.00259835	0	627	0	2	2	2	4.6	74.605	671	0	13.177	5940300	3			558
A0A087X2H1;Q9ULT8;G3V4V5;H0YJP0;H0YJD4;A0A087WVU6	E3 ubiquitin-protein ligase HECTD1	HECTD1	tr|A0A087X2H1|A0A087X2H1_HUMAN HECT-type E3 ubiquitin transferase OS=Homo sapiens OX=9606 GN=HECTD1 PE=1 SV=1;sp|Q9ULT8|HECD1_HUMAN E3 ubiquitin-protein ligase HECTD1 OS=Homo sapiens OX=9606 GN=HECTD1 PE=1 SV=3;tr|G3V4V5|G3V4V5_HUMAN E3 ubiquitin-protein l	265340	412	0.00284943	5924200	746	0.0025913	0	627	0	6	5	5	2.1	289.63	2614	0	43.915	6189500	5			47
V9GYX7;Q9NZ32;G3V524;G3V2Q5;G3V5Y4;F6S9Y6	Actin-related protein 10	ACTR10	tr|V9GYX7|V9GYX7_HUMAN Actin-related protein 10 (Fragment) OS=Homo sapiens OX=9606 GN=ACTR10 PE=1 SV=1;sp|Q9NZ32|ARP10_HUMAN Actin-related protein 10 OS=Homo sapiens OX=9606 GN=ACTR10 PE=1 SV=1	21395	653	0.000229756	5902100	747	0.00258164	60047	616	0.000461717	6	3	3	15.6	33.201	302	0	24.591	5983500	6			1181
Q8IZF6	Probable G-protein coupled receptor 112	GPR112	sp|Q8IZF6|AGRG4_HUMAN Adhesion G-protein coupled receptor G4 OS=Homo sapiens OX=9606 GN=ADGRG4 PE=2 SV=2	0	657	0	5871600	748	0.0025683	0	627	0	1	1	1	0.3	333.36	3080	1	-2	5871600	0	+		1055
X1WI28;P27635;B8A6G2;F8W7C6;A0A087WV22;A6QRI9	60S ribosomal protein L10	RPL10	tr|X1WI28|X1WI28_HUMAN 60S ribosomal protein L10 (Fragment) OS=Homo sapiens OX=9606 GN=RPL10 PE=1 SV=7;sp|P27635|RL10_HUMAN 60S ribosomal protein L10 OS=Homo sapiens OX=9606 GN=RPL10 PE=1 SV=4;tr|B8A6G2|B8A6G2_HUMAN 60S ribosomal protein L10 (Fragment) OS=	0	657	0	5871500	749	0.00256825	0	627	0	6	2	2	20.5	22.975	200	0	13.458	5871500	6			698
G3V576;G3V2Q1;P07910;G3V555;G3V575	Heterogeneous nuclear ribonucleoproteins C1/C2	HNRNPC	tr|G3V576|G3V576_HUMAN Heterogeneous nuclear ribonucleoproteins C1/C2 OS=Homo sapiens OX=9606 GN=HNRNPC PE=1 SV=1;tr|G3V2Q1|G3V2Q1_HUMAN Heterogeneous nuclear ribonucleoproteins C1/C2 OS=Homo sapiens OX=9606 GN=HNRNPC PE=1 SV=1;sp|P07910|HNRPC_HUMAN Hetero	0	657	0	5861900	750	0.00256405	0	627	0	5	9	1	41.1	25.256	231	0	15.286	5861900	7			353
Q96JQ2;G3V3D8	Calmin	CLMN	sp|Q96JQ2|CLMN_HUMAN Calmin OS=Homo sapiens OX=9606 GN=CLMN PE=1 SV=1;tr|G3V3D8|G3V3D8_HUMAN Calmin OS=Homo sapiens OX=9606 GN=CLMN PE=1 SV=1	0	657	0	5825400	751	0.00254809	0	627	0	2	2	2	2.7	111.65	1002	0.0019881	10.938	5825400	2			1102
A0A087WYF6;F8W7U3;E7ESD2;A0A0A0MR88;A0A096LPC5;Q9Y4E1;Q641Q2;J3KP36;A0A0A0MT65	WASH complex subunit FAM21C;WASH complex subunit FAM21A	FAM21A;FAM21C	tr|A0A087WYF6|A0A087WYF6_HUMAN WASH complex subunit 2A OS=Homo sapiens OX=9606 GN=WASHC2A PE=1 SV=1;tr|F8W7U3|F8W7U3_HUMAN WASH complex subunit 2A OS=Homo sapiens OX=9606 GN=WASHC2A PE=1 SV=1;tr|E7ESD2|E7ESD2_HUMAN WASH complex subunit 2A OS=Homo sapiens O	174000	471	0.00186855	5807900	752	0.00254043	484910	402	0.0037286	9	5	5	8	136.57	1245	0	44.784	6466800	9			32
P09486;E5RK62;F5GY03	SPARC	SPARC	sp|P09486|SPRC_HUMAN SPARC OS=Homo sapiens OX=9606 GN=SPARC PE=1 SV=1;tr|E5RK62|E5RK62_HUMAN Osteonectin (Fragment) OS=Homo sapiens OX=9606 GN=SPARC PE=1 SV=1;tr|F5GY03|F5GY03_HUMAN Osteonectin (Fragment) OS=Homo sapiens OX=9606 GN=SPARC PE=1 SV=1	0	657	0	5788900	753	0.00253212	0	627	0	3	2	2	13.5	34.632	303	0	12.758	5788900	4			606
A0A0B4J1Z5;P52657	Transcription initiation factor IIA subunit 2	GTF2A2	tr|A0A0B4J1Z5|A0A0B4J1Z5_HUMAN Transcription initiation factor IIA gamma chain OS=Homo sapiens OX=9606 GN=GTF2A2 PE=1 SV=1;sp|P52657|T2AG_HUMAN Transcription initiation factor IIA subunit 2 OS=Homo sapiens OX=9606 GN=GTF2A2 PE=1 SV=1	0	657	0	5786400	754	0.00253103	0	627	0	2	1	1	21.6	8.4534	74	0	33.832	5786400	3			62
O43172	U4/U6 small nuclear ribonucleoprotein Prp4	PRPF4	sp|O43172|PRP4_HUMAN U4/U6 small nuclear ribonucleoprotein Prp4 OS=Homo sapiens OX=9606 GN=PRPF4 PE=1 SV=2	0	657	0	5779500	755	0.00252801	0	627	0	1	2	2	5.7	58.449	522	0	13.787	5779500	3			510
Q96F63	Coiled-coil domain-containing protein 97	CCDC97	sp|Q96F63|CCD97_HUMAN Coiled-coil domain-containing protein 97 OS=Homo sapiens OX=9606 GN=CCDC97 PE=1 SV=1	0	657	0	5730700	756	0.00250667	0	627	0	1	2	2	10.5	38.946	343	0.0010183	11.524	5730700	2			1100
A0A2R8Y4F5;H0YFD6;P40939	Trifunctional enzyme subunit alpha, mitochondrial;Long-chain enoyl-CoA hydratase;Long chain 3-hydroxyacyl-CoA dehydrogenase	HADHA	tr|A0A2R8Y4F5|A0A2R8Y4F5_HUMAN Enoyl-CoA hydratase OS=Homo sapiens OX=9606 GN=HADHA PE=1 SV=1;tr|H0YFD6|H0YFD6_HUMAN Enoyl-CoA hydratase OS=Homo sapiens OX=9606 GN=HADHA PE=1 SV=2;sp|P40939|ECHA_HUMAN Trifunctional enzyme subunit alpha, mitochondrial OS=Ho	193980	457	0.00208311	5704100	757	0.00249503	178240	562	0.00137053	3	5	5	10.6	79.466	728	0	41.186	6076300	5			101
Q9UBL6;E7ENV7;O75131;Q96FN4;Q8IYJ1;Q96A23;O95741;Q86YQ8;Q9HCH3	Copine-7;Copine-3;Copine-2;Copine-9;Copine-4;Copine-6;Copine-8;Copine-5	CPNE7;CPNE8;CPNE3;CPNE2;CPNE9;CPNE4;CPNE6;CPNE5	sp|Q9UBL6|CPNE7_HUMAN Copine-7 OS=Homo sapiens OX=9606 GN=CPNE7 PE=1 SV=1;tr|E7ENV7|E7ENV7_HUMAN Copine-8 OS=Homo sapiens OX=9606 GN=CPNE8 PE=1 SV=2;sp|O75131|CPNE3_HUMAN Copine-3 OS=Homo sapiens OX=9606 GN=CPNE3 PE=1 SV=1;sp|Q96FN4|CPNE2_HUMAN Copine-2 OS	0	657	0	5697000	758	0.00249192	0	627	0	9	2	2	4.4	70.293	633	0.0010235	11.578	5697000	2			1192
G3V279;P84090	Enhancer of rudimentary homolog	ERH	tr|G3V279|G3V279_HUMAN Enhancer of rudimentary homolog OS=Homo sapiens OX=9606 GN=ERH PE=1 SV=1;sp|P84090|ERH_HUMAN Enhancer of rudimentary homolog OS=Homo sapiens OX=9606 GN=ERH PE=1 SV=1	0	657	0	5676600	759	0.002483	0	627	0	2	1	1	15.5	8.2033	71	0	25.631	5676600	1			352
Q709F0;D6RDI8	Acyl-CoA dehydrogenase family member 11	ACAD11	sp|Q709F0|ACD11_HUMAN Acyl-CoA dehydrogenase family member 11 OS=Homo sapiens OX=9606 GN=ACAD11 PE=1 SV=3;tr|D6RDI8|D6RDI8_HUMAN Acyl-CoA dehydrogenase family member 11 OS=Homo sapiens OX=9606 GN=ACAD11 PE=1 SV=2	0	657	0	5666300	760	0.0024785	0	627	0	2	2	2	5.3	87.263	780	0	12.796	5666300	3			1032
P40616;F8VP99;F8W1Z8;F8VP63;B4DZG7;F8VYN9	ADP-ribosylation factor-like protein 1	ARL1	sp|P40616|ARL1_HUMAN ADP-ribosylation factor-like protein 1 OS=Homo sapiens OX=9606 GN=ARL1 PE=1 SV=1;tr|F8VP99|F8VP99_HUMAN ADP-ribosylation factor-like protein 1 (Fragment) OS=Homo sapiens OX=9606 GN=ARL1 PE=1 SV=1;tr|F8W1Z8|F8W1Z8_HUMAN ADP-ribosylation	17694	655	0.000190012	5663700	761	0.00247736	52831	619	0.000406231	6	2	2	14.9	20.417	181	0	14.796	5734200	6			750
Q8WUM4;F8WEQ7;F8WBR8;C9IZF9;A0A3B3IT07	Programmed cell death 6-interacting protein	PDCD6IP	sp|Q8WUM4|PDC6I_HUMAN Programmed cell death 6-interacting protein OS=Homo sapiens OX=9606 GN=PDCD6IP PE=1 SV=1	130890	525	0.0014056	5635400	762	0.00246498	278230	494	0.00213938	5	4	4	8.3	96.022	868	0	29.989	6044500	8			1074
A0A1W2PNX8;Q9H3U1	Protein unc-45 homolog A	UNC45A	tr|A0A1W2PNX8|A0A1W2PNX8_HUMAN Protein unc-45 homolog A OS=Homo sapiens OX=9606 GN=UNC45A PE=1 SV=1;sp|Q9H3U1|UN45A_HUMAN Protein unc-45 homolog A OS=Homo sapiens OX=9606 GN=UNC45A PE=1 SV=1	0	657	0	5629900	763	0.00246257	0	627	0	2	4	4	5.8	118.39	1084	0	23.827	5629900	4			92
Q5TDF0;Q9BSD7	Cancer-related nucleoside-triphosphatase	NTPCR	tr|Q5TDF0|Q5TDF0_HUMAN Cancer-related nucleoside-triphosphatase OS=Homo sapiens OX=9606 GN=NTPCR PE=1 SV=1;sp|Q9BSD7|NTPCR_HUMAN Cancer-related nucleoside-triphosphatase OS=Homo sapiens OX=9606 GN=NTPCR PE=1 SV=1	82352	589	0.00088436	5574300	764	0.00243825	295150	485	0.00226948	2	3	3	12.7	25.072	228	0	23.255	5951800	5			1015
A0A0R4J2F3;P0DPB6			tr|A0A0R4J2F3|A0A0R4J2F3_HUMAN DNA-directed RNA polymerase I subunit D OS=Homo sapiens OX=9606 GN=POLR1D PE=1 SV=1;sp|P0DPB6|RPAC2_HUMAN DNA-directed RNA polymerases I and III subunit RPAC2 OS=Homo sapiens OX=9606 GN=POLR1D PE=1 SV=1	0	657	0	5565100	765	0.00243423	0	627	0	2	1	1	16.4	13.262	116	0.005277	6.5506	5565100	1			83
E9PHA2;Q15003;C9J470;H7C415;C9JZP1	Condensin complex subunit 2	NCAPH	tr|E9PHA2|E9PHA2_HUMAN Condensin complex subunit 2 OS=Homo sapiens OX=9606 GN=NCAPH PE=1 SV=1;sp|Q15003|CND2_HUMAN Condensin complex subunit 2 OS=Homo sapiens OX=9606 GN=NCAPH PE=1 SV=3;tr|C9J470|C9J470_HUMAN Condensin complex subunit 2 (Fragment) OS=Homo	109490	552	0.00117579	5548700	766	0.00242706	791220	328	0.00608389	5	6	6	12.3	81.572	730	0	39.895	6449400	13			291
P30041	Peroxiredoxin-6	PRDX6	sp|P30041|PRDX6_HUMAN Peroxiredoxin-6 OS=Homo sapiens OX=9606 GN=PRDX6 PE=1 SV=3	74386	602	0.000798815	5521000	767	0.00241494	0	627	0	1	3	3	18.8	25.035	224	0	19.765	5595400	3			710
E9PFD2;P11172;F2Z3P2;F2Z303;F8WDG4	Uridine 5-monophosphate synthase;Orotate phosphoribosyltransferase;Orotidine 5-phosphate decarboxylase	UMPS	tr|E9PFD2|E9PFD2_HUMAN OMPdecase OS=Homo sapiens OX=9606 GN=UMPS PE=1 SV=1;sp|P11172|UMPS_HUMAN Uridine 5-monophosphate synthase OS=Homo sapiens OX=9606 GN=UMPS PE=1 SV=1;tr|F2Z3P2|F2Z3P2_HUMAN Uridine 5-monophosphate synthase OS=Homo sapiens OX=9606 GN=	0	657	0	5479300	768	0.0023967	0	627	0	5	2	2	7.9	37.64	342	0	33.407	5479300	3			287
Q96ST3	Paired amphipathic helix protein Sin3a	SIN3A	sp|Q96ST3|SIN3A_HUMAN Paired amphipathic helix protein Sin3a OS=Homo sapiens OX=9606 GN=SIN3A PE=1 SV=2	0	657	0	5474200	769	0.00239447	0	627	0	1	2	2	2.9	145.17	1273	0	12.4	5474200	2			1113
Q9H0C8;F8SNU6;H7C2I8;E9PC05;F8SNU7	Integrin-linked kinase-associated serine/threonine phosphatase 2C	ILKAP	sp|Q9H0C8|ILKAP_HUMAN Integrin-linked kinase-associated serine/threonine phosphatase 2C OS=Homo sapiens OX=9606 GN=ILKAP PE=1 SV=1	0	657	0	5446300	770	0.00238227	0	627	0	5	3	3	8.2	42.906	392	0	20.897	5446300	4			1147
H0YEB6;O60232;H0YEK1;G3V1B8;E9PN57;E9PK41	Sjoegren syndrome/scleroderma autoantigen 1	SSSCA1	tr|H0YEB6|H0YEB6_HUMAN Protein ZNRD2 (Fragment) OS=Homo sapiens OX=9606 GN=ZNRD2 PE=1 SV=1;sp|O60232|ZNRD2_HUMAN Protein ZNRD2 OS=Homo sapiens OX=9606 GN=ZNRD2 PE=1 SV=1;tr|H0YEK1|H0YEK1_HUMAN Protein ZNRD2 (Fragment) OS=Homo sapiens OX=9606 GN=ZNRD2 PE=1	0	657	0	5441300	771	0.00238008	858300	312	0.00659969	6	3	3	20.7	20.916	193	0	50.817	6299600	5			369
E7EMW7;O95071;E7ET84	E3 ubiquitin-protein ligase UBR5	UBR5	tr|E7EMW7|E7EMW7_HUMAN E3 ubiquitin-protein ligase UBR5 OS=Homo sapiens OX=9606 GN=UBR5 PE=1 SV=1;sp|O95071|UBR5_HUMAN E3 ubiquitin-protein ligase UBR5 OS=Homo sapiens OX=9606 GN=UBR5 PE=1 SV=2;tr|E7ET84|E7ET84_HUMAN E3 ubiquitin-protein ligase UBR5 OS=Hom	0	657	0	5421100	772	0.00237124	0	627	0	3	2	2	1	308.57	2792	0	12.216	5421100	2			268
D6R938;E9PBG7;E9PF82;Q13557;H0Y9C2;A0A5F9ZH90;H7BXS4;A0A5F9ZHY2;A0A5K1VW76;Q8WU40;A0A5F9ZHM9;A0A5F9ZH21;A0A5F9ZHR5;Q5SWX3;D6RFJ0;A0A2Q3DQE3;A0A5F9ZH50;Q9UQM7;Q13555;Q13554;E9PBE8;E7EQE4;H0Y9J2;H0Y6G2	Calcium/calmodulin-dependent protein kinase type II subunit delta;Calcium/calmodulin-dependent protein kinase type II subunit alpha;Calcium/calmodulin-dependent protein kinase type II subunit gamma;Calcium/calmodulin-dependent protein kinase type II subunit beta	CAMK2D;CAMK2B;CAMK2G;CAMK2A	tr|D6R938|D6R938_HUMAN Calcium/calmodulin-dependent protein kinase OS=Homo sapiens OX=9606 GN=CAMK2D PE=1 SV=1;tr|E9PBG7|E9PBG7_HUMAN Calcium/calmodulin-dependent protein kinase OS=Homo sapiens OX=9606 GN=CAMK2D PE=1 SV=1;tr|E9PF82|E9PF82_HUMAN Calcium/cal	268550	409	0.0028839	5406900	773	0.00236503	257090	515	0.00197683	24	3	3	11.2	56.298	498	0	31.557	5932600	8			247
A0A0J9YWF7;A0A1B0GUY0;A0A1B0GTY9;A0A1B0GUA1;A0A1B0GTG2;A0A1B0GW82;A0A1B0GW77;P49419;A0A1B0GTJ4;F8WDY6;A0A1B0GVU0;F8VVF2;H0YHM6;A0A1B0GV49	Alpha-aminoadipic semialdehyde dehydrogenase	ALDH7A1	tr|A0A0J9YWF7|A0A0J9YWF7_HUMAN Alpha-aminoadipic semialdehyde dehydrogenase OS=Homo sapiens OX=9606 GN=ALDH7A1 PE=1 SV=1;tr|A0A1B0GUY0|A0A1B0GUY0_HUMAN Alpha-aminoadipic semialdehyde dehydrogenase (Fragment) OS=Homo sapiens OX=9606 GN=ALDH7A1 PE=1 SV=1;tr|	0	657	0	5400000	774	0.00236201	0	627	0	14	3	3	17	32.085	294	0	39.754	5400000	3			79
Q9Y547	Intraflagellar transport protein 25 homolog	HSPB11	sp|Q9Y547|IFT25_HUMAN Intraflagellar transport protein 25 homolog OS=Homo sapiens OX=9606 GN=HSPB11 PE=1 SV=1	0	657	0	5392500	775	0.00235873	0	627	0	1	1	1	17.4	16.297	144	0.0029126	9.293	5392500	3			1241
O60462	Neuropilin-2	NRP2	sp|O60462|NRP2_HUMAN Neuropilin-2 OS=Homo sapiens OX=9606 GN=NRP2 PE=1 SV=3	0	657	0	5389700	776	0.00235751	0	627	0	1	2	2	3.7	104.83	931	0	27.496	5389700	1			529
G5E9A6;P51784;Q5JXD3	Ubiquitin carboxyl-terminal hydrolase;Ubiquitin carboxyl-terminal hydrolase 11	USP11	tr|G5E9A6|G5E9A6_HUMAN Ubiquitin carboxyl-terminal hydrolase OS=Homo sapiens OX=9606 GN=USP11 PE=1 SV=1;sp|P51784|UBP11_HUMAN Ubiquitin carboxyl-terminal hydrolase 11 OS=Homo sapiens OX=9606 GN=USP11 PE=1 SV=3	0	657	0	5362300	777	0.00234552	0	627	0	3	5	4	10.7	105.03	920	0	29.317	5362300	7			356
P25705;K7EK77;K7ENJ4;K7ERX7;K7EJP1;K7EQH4;K7ESA0	ATP synthase subunit alpha, mitochondrial	ATP5A1	sp|P25705|ATPA_HUMAN ATP synthase subunit alpha, mitochondrial OS=Homo sapiens OX=9606 GN=ATP5F1A PE=1 SV=1;tr|K7EK77|K7EK77_HUMAN ATP synthase subunit alpha, mitochondrial (Fragment) OS=Homo sapiens OX=9606 GN=ATP5F1A PE=1 SV=1;tr|K7ENJ4|K7ENJ4_HUMAN ATP	355780	359	0.00382064	5344200	778	0.00233761	748880	340	0.00575833	7	8	8	16.5	59.75	553	0	58.097	6448900	11			690
Q13409;E9PGG1;E7EU01;E7EUM4;E7ERR6;E7ERH4;E7ET01;E7ETL8;E7EQU2;E7ESD3;E7EMU4;E7EV09;E7EQL5	Cytoplasmic dynein 1 intermediate chain 2	DYNC1I2	sp|Q13409|DC1I2_HUMAN Cytoplasmic dynein 1 intermediate chain 2 OS=Homo sapiens OX=9606 GN=DYNC1I2 PE=1 SV=3;tr|E9PGG1|E9PGG1_HUMAN Cytoplasmic dynein 1 intermediate chain 2 (Fragment) OS=Homo sapiens OX=9606 GN=DYNC1I2 PE=1 SV=1;tr|E7EU01|E7EU01_HUMAN Cyt	380120	348	0.00408202	5325400	779	0.00232938	178250	561	0.00137061	13	3	3	8.3	71.456	638	0	40.822	5883800	9			941
P55084;B5MD38;F5GZQ3;C9JEY0;C9JE81;C9K0M0	Trifunctional enzyme subunit beta, mitochondrial;3-ketoacyl-CoA thiolase	HADHB	sp|P55084|ECHB_HUMAN Trifunctional enzyme subunit beta, mitochondrial OS=Homo sapiens OX=9606 GN=HADHB PE=1 SV=3;tr|B5MD38|B5MD38_HUMAN Trifunctional enzyme subunit beta, mitochondrial OS=Homo sapiens OX=9606 GN=HADHB PE=1 SV=1;tr|F5GZQ3|F5GZQ3_HUMAN Trifu	0	657	0	5261400	780	0.00230139	839500	317	0.00645513	6	6	6	17.1	51.294	474	0	38.001	6100900	9			824
P47755;F8W9N7;C9JUG7;A0A0D9SET8	F-actin-capping protein subunit alpha-2	CAPZA2	sp|P47755|CAZA2_HUMAN F-actin-capping protein subunit alpha-2 OS=Homo sapiens OX=9606 GN=CAPZA2 PE=1 SV=3;tr|F8W9N7|F8W9N7_HUMAN F-actin-capping protein subunit alpha OS=Homo sapiens OX=9606 GN=CAPZA2 PE=1 SV=1;tr|C9JUG7|C9JUG7_HUMAN F-actin-capping protei	140740	511	0.00151138	5236100	781	0.00229032	0	627	0	4	5	3	23.8	32.949	286	0	31.614	5376800	3			773
Q9UKD2	mRNA turnover protein 4 homolog	MRTO4	sp|Q9UKD2|MRT4_HUMAN mRNA turnover protein 4 homolog OS=Homo sapiens OX=9606 GN=MRTO4 PE=1 SV=2	0	657	0	5220800	782	0.00228363	0	627	0	1	2	2	14.6	27.56	239	0	14.934	5220800	4			1209
Q8WU90	Zinc finger CCCH domain-containing protein 15	ZC3H15	sp|Q8WU90|ZC3HF_HUMAN Zinc finger CCCH domain-containing protein 15 OS=Homo sapiens OX=9606 GN=ZC3H15 PE=1 SV=1	0	657	0	5213900	783	0.00228061	0	627	0	1	2	2	7.3	48.602	426	0	12.084	5213900	2			1073
Q14318;U3KQI1;M0R1Q0;M0R1S6;M0R2Q6;A0A0A0MTJ1;M0R2K9	Peptidyl-prolyl cis-trans isomerase FKBP8;Peptidyl-prolyl cis-trans isomerase	FKBP8	sp|Q14318|FKBP8_HUMAN Peptidyl-prolyl cis-trans isomerase FKBP8 OS=Homo sapiens OX=9606 GN=FKBP8 PE=1 SV=2;tr|U3KQI1|U3KQI1_HUMAN Peptidyl-prolyl cis-trans isomerase FKBP8 (Fragment) OS=Homo sapiens OX=9606 GN=FKBP8 PE=1 SV=1;tr|M0R1Q0|M0R1Q0_HUMAN Peptidy	0	657	0	5209100	784	0.00227851	0	627	0	7	2	2	10.9	44.561	412	0	15.151	5209100	2			957
Q13426	DNA repair protein XRCC4	XRCC4	sp|Q13426|XRCC4_HUMAN DNA repair protein XRCC4 OS=Homo sapiens OX=9606 GN=XRCC4 PE=1 SV=2	0	657	0	5183000	785	0.0022671	0	627	0	1	2	2	10.4	38.286	336	0	40.338	5183000	3			942
H3BNB9;Q9Y4X5;H3BSK4	E3 ubiquitin-protein ligase ARIH1	ARIH1	tr|H3BNB9|H3BNB9_HUMAN RBR-type E3 ubiquitin transferase (Fragment) OS=Homo sapiens OX=9606 GN=ARIH1 PE=1 SV=1;sp|Q9Y4X5|ARI1_HUMAN E3 ubiquitin-protein ligase ARIH1 OS=Homo sapiens OX=9606 GN=ARIH1 PE=1 SV=2;tr|H3BSK4|H3BSK4_HUMAN E3 ubiquitin-protein lig	0	657	0	5165800	786	0.00225957	0	627	0	3	2	2	13.7	22.216	204	0	49.086	5165800	2			385
P62330	ADP-ribosylation factor 6	ARF6	sp|P62330|ARF6_HUMAN ADP-ribosylation factor 6 OS=Homo sapiens OX=9606 GN=ARF6 PE=1 SV=2	168450	477	0.00180895	5085000	787	0.00222423	0	627	0	1	3	3	23.4	20.082	175	0	16.574	5253400	2			860
A0A6Q8PFA7;A0A6Q8PFQ8;A0A6Q8PFS4;A0A6Q8PHC0;A0A6Q8PHJ9;A0A6Q8PG15;A0A6Q8PFM5;A0A6Q8PFE1;O95831;A0A6Q8PF87;E9PMA0;A0A6Q8PFW2	Apoptosis-inducing factor 1, mitochondrial	AIFM1	tr|A0A6Q8PFA7|A0A6Q8PFA7_HUMAN Apoptosis-inducing factor 1, mitochondrial OS=Homo sapiens OX=9606 GN=AIFM1 PE=1 SV=1;tr|A0A6Q8PFQ8|A0A6Q8PFQ8_HUMAN Apoptosis-inducing factor 1, mitochondrial OS=Homo sapiens OX=9606 GN=AIFM1 PE=1 SV=1;tr|A0A6Q8PFS4|A0A6Q8PF	0	657	0	5059000	788	0.00221286	0	627	0	12	2	2	11.1	50.316	460	0	14.459	5059000	3			158
A0A087WTA5;E7ERK9;Q9UI10	Translation initiation factor eIF-2B subunit delta	EIF2B4	tr|A0A087WTA5|A0A087WTA5_HUMAN Translation initiation factor eIF-2B subunit delta OS=Homo sapiens OX=9606 GN=EIF2B4 PE=1 SV=1;tr|E7ERK9|E7ERK9_HUMAN Translation initiation factor eIF-2B subunit delta OS=Homo sapiens OX=9606 GN=EIF2B4 PE=1 SV=1;sp|Q9UI10|EI	0	657	0	5049300	789	0.00220861	375490	438	0.00288724	3	3	3	9	57.495	520	0	21.936	5424800	7			8
Q99714	3-hydroxyacyl-CoA dehydrogenase type-2	HSD17B10	sp|Q99714|HCD2_HUMAN 3-hydroxyacyl-CoA dehydrogenase type-2 OS=Homo sapiens OX=9606 GN=HSD17B10 PE=1 SV=3	17456	656	0.000187456	5042200	790	0.00220551	0	627	0	1	2	2	15.3	26.923	261	0	27.971	5059700	5			1121
P31939;F8WEF0;C9JLK0	Bifunctional purine biosynthesis protein PURH;Phosphoribosylaminoimidazolecarboxamide formyltransferase;IMP cyclohydrolase	ATIC	sp|P31939|PUR9_HUMAN Bifunctional purine biosynthesis protein ATIC OS=Homo sapiens OX=9606 GN=ATIC PE=1 SV=3	78014	599	0.000837775	5039400	791	0.00220428	37778	622	0.000290485	3	4	4	12	64.615	592	0	36.223	5155100	7			718
E9PB51;Q9BWF3;E9PLB0;E9PM61;D6R9K7;U3KQD5;J3QRR5;Q9BQ04	RNA-binding protein 4;RNA-binding protein 4B	RBM4;RBM4B	tr|E9PB51|E9PB51_HUMAN RNA-binding protein 4 (Fragment) OS=Homo sapiens OX=9606 GN=RBM4 PE=1 SV=1;sp|Q9BWF3|RBM4_HUMAN RNA-binding protein 4 OS=Homo sapiens OX=9606 GN=RBM4 PE=1 SV=1;tr|E9PLB0|E9PLB0_HUMAN RNA-binding protein 4B OS=Homo sapiens OX=9606 GN=	221950	433	0.00238347	5037000	792	0.00220323	0	627	0	8	2	2	15	26.286	240	0.0029762	10.926	5258900	2			283
P52298;F8WE41;C9JQX9;B3KSB0	Nuclear cap-binding protein subunit 2	NCBP2	sp|P52298|NCBP2_HUMAN Nuclear cap-binding protein subunit 2 OS=Homo sapiens OX=9606 GN=NCBP2 PE=1 SV=1;tr|F8WE41|F8WE41_HUMAN Nuclear cap-binding protein subunit 2 OS=Homo sapiens OX=9606 GN=NCBP2 PE=1 SV=1;tr|C9JQX9|C9JQX9_HUMAN Nuclear cap-binding protei	0	657	0	4985700	793	0.00218079	0	627	0	4	2	2	15.4	18.001	156	0	27.201	4985700	2			805
Q8N6N7	Acyl-CoA-binding domain-containing protein 7	ACBD7	sp|Q8N6N7|ACBD7_HUMAN Acyl-CoA-binding domain-containing protein 7 OS=Homo sapiens OX=9606 GN=ACBD7 PE=1 SV=1	0	657	0	4982000	794	0.00217918	0	627	0	1	1	1	9.1	9.7902	88	0.0076401	6.3247	4982000	1			1062
Q9H223	EH domain-containing protein 4	EHD4	sp|Q9H223|EHD4_HUMAN EH domain-containing protein 4 OS=Homo sapiens OX=9606 GN=EHD4 PE=1 SV=1	0	657	0	4963300	795	0.002171	0	627	0	1	2	2	5	61.174	541	0	16.449	4963300	3			1149
Q8WVC2;Q9BYK1;P63220;Q9BYK2	40S ribosomal protein S21	RPS21	tr|Q8WVC2|Q8WVC2_HUMAN 40S ribosomal protein S21 OS=Homo sapiens OX=9606 GN=RPS21 PE=1 SV=1;tr|Q9BYK1|Q9BYK1_HUMAN 40S ribosomal protein S21 OS=Homo sapiens OX=9606 GN=RPS21 PE=1 SV=1;sp|P63220|RS21_HUMAN 40S ribosomal protein S21 OS=Homo sapiens OX=9606 G	0	657	0	4909400	796	0.00214742	0	627	0	4	2	2	30.9	8.85	81	0.0010173	11.502	4909400	3			878
F8VZX2;H3BRU6;F8VXH9;F8W0G4;F8VRH0;F8W1G6;H3BND9;J3QT27;E9PFP8;P57721		PCBP2	tr|F8VZX2|F8VZX2_HUMAN Poly(rC)-binding protein 2 OS=Homo sapiens OX=9606 GN=PCBP2 PE=1 SV=1;tr|H3BRU6|H3BRU6_HUMAN Poly(rC)-binding protein 2 (Fragment) OS=Homo sapiens OX=9606 GN=PCBP2 PE=1 SV=1;tr|F8VXH9|F8VXH9_HUMAN Poly(rC)-binding protein 2 (Fragment	0	657	0	4896800	797	0.00214191	0	627	0	10	6	1	37.1	33.8	321	0.0060764	6.4617	4896800	2			338
Q9HCS7	Pre-mRNA-splicing factor SYF1	XAB2	sp|Q9HCS7|SYF1_HUMAN Pre-mRNA-splicing factor SYF1 OS=Homo sapiens OX=9606 GN=XAB2 PE=1 SV=2	0	657	0	4882400	798	0.00213561	0	627	0	1	2	2	2.6	100.01	855	0	14.044	4882400	2			1164
Q6PD74;H0YL49	Alpha- and gamma-adaptin-binding protein p34	AAGAB	sp|Q6PD74|AAGAB_HUMAN Alpha- and gamma-adaptin-binding protein p34 OS=Homo sapiens OX=9606 GN=AAGAB PE=1 SV=1	97109	567	0.00104283	4881800	799	0.00213535	0	627	0	2	3	3	20	34.593	315	0	18.978	4978900	6			1026
F8WDV0;Q9UI26;H0Y8M5	Importin-11	IPO11	tr|F8WDV0|F8WDV0_HUMAN Importin-11 OS=Homo sapiens OX=9606 GN=IPO11 PE=1 SV=1;sp|Q9UI26|IPO11_HUMAN Importin-11 OS=Homo sapiens OX=9606 GN=IPO11 PE=1 SV=1	0	657	0	4862700	800	0.00212699	0	627	0	3	3	3	5.4	99.707	863	0	20.424	4862700	4			345
O00592	Podocalyxin	PODXL	sp|O00592|PODXL_HUMAN Podocalyxin OS=Homo sapiens OX=9606 GN=PODXL PE=1 SV=2	952300	234	0.0102265	4840600	801	0.00211733	828670	321	0.00637186	1	3	3	9	58.635	558	0	17.519	6621600	4			490
Q96SU4	Oxysterol-binding protein-related protein 9	OSBPL9	sp|Q96SU4|OSBL9_HUMAN Oxysterol-binding protein-related protein 9 OS=Homo sapiens OX=9606 GN=OSBPL9 PE=1 SV=2	0	657	0	4828600	802	0.00211208	0	627	0	1	2	2	2.9	83.184	736	0	12.484	4828600	3			1114
A0A0C4DGA2;O75521;F8WAW4;F8W6J1;F1LLU7;C9JB63	Enoyl-CoA delta isomerase 2, mitochondrial	ECI2	tr|A0A0C4DGA2|A0A0C4DGA2_HUMAN Enoyl-CoA delta isomerase 2, mitochondrial OS=Homo sapiens OX=9606 GN=ECI2 PE=1 SV=1;sp|O75521|ECI2_HUMAN Enoyl-CoA delta isomerase 2 OS=Homo sapiens OX=9606 GN=ECI2 PE=1 SV=4;tr|F8WAW4|F8WAW4_HUMAN Enoyl-CoA delta isomerase	0	657	0	4765700	803	0.00208456	0	627	0	6	2	2	6.6	40.183	364	0	34.423	4765700	2			68
A0A0B4J2F8;F6S314;E2QRJ6;P52435;D6RAG0;E7EP90;A0A0B4J1Z8;F8WF84;A6NFM0;E7EWC6;H0Y980;Q9H1A7;Q9GZM3	DNA-directed RNA polymerase II subunit RPB11-a;DNA-directed RNA polymerase II subunit RPB11-b2;DNA-directed RNA polymerase II subunit RPB11-b1	POLR2J3;POLR2J;POLR2J2	tr|A0A0B4J2F8|A0A0B4J2F8_HUMAN DNA-directed RNA polymerase II subunit RPB11-b2 OS=Homo sapiens OX=9606 GN=POLR2J3 PE=3 SV=1;tr|F6S314|F6S314_HUMAN DNA-directed RNA polymerase II subunit RPB11-a OS=Homo sapiens OX=9606 GN=POLR2J PE=3 SV=1;tr|E2QRJ6|E2QRJ6_H	0	657	0	4757200	804	0.00208085	0	627	0	13	2	2	18.3	13.074	115	0	13.901	4757200	3			65
B7Z7F3;Q9H6Z4;K7EIJ4;K7ENJ2;K7EID7;K7ENB9;K7EPW1	Ran-binding protein 3	RANBP3	tr|B7Z7F3|B7Z7F3_HUMAN Ran-binding protein 3 OS=Homo sapiens OX=9606 GN=RANBP3 PE=1 SV=1;sp|Q9H6Z4|RANB3_HUMAN Ran-binding protein 3 OS=Homo sapiens OX=9606 GN=RANBP3 PE=1 SV=1;tr|K7EIJ4|K7EIJ4_HUMAN Ran-binding protein 3 (Fragment) OS=Homo sapiens OX=9606	417300	342	0.00448129	4739100	805	0.00207293	0	627	0	7	3	3	8.9	52.894	494	0	20.864	5156400	2			204
M0R2N5;Q9NZ01;M0R3C3	Very-long-chain enoyl-CoA reductase	TECR	tr|M0R2N5|M0R2N5_HUMAN Very-long-chain enoyl-CoA reductase OS=Homo sapiens OX=9606 GN=TECR PE=1 SV=1;sp|Q9NZ01|TECR_HUMAN Very-long-chain enoyl-CoA reductase OS=Homo sapiens OX=9606 GN=TECR PE=1 SV=1;tr|M0R3C3|M0R3C3_HUMAN Very-long-chain enoyl-CoA reducta	0	657	0	4724200	806	0.00206641	0	627	0	3	2	2	7.5	39.967	346	0	12.297	4724200	1			474
Q9BY32	Inosine triphosphate pyrophosphatase	ITPA	sp|Q9BY32|ITPA_HUMAN Inosine triphosphate pyrophosphatase OS=Homo sapiens OX=9606 GN=ITPA PE=1 SV=2	0	657	0	4708300	807	0.00205946	0	627	0	1	1	1	10.8	21.445	194	0.0045208	6.7819	4708300	3			1143
E5RJ95;E5RFS0;E5RIC7;Q969P6	DNA topoisomerase I, mitochondrial	TOP1MT	tr|E5RJ95|E5RJ95_HUMAN DNA topoisomerase I, mitochondrial (Fragment) OS=Homo sapiens OX=9606 GN=TOP1MT PE=1 SV=1;tr|E5RFS0|E5RFS0_HUMAN DNA topoisomerase I, mitochondrial (Fragment) OS=Homo sapiens OX=9606 GN=TOP1MT PE=1 SV=1;tr|E5RIC7|E5RIC7_HUMAN DNA top	0	657	0	4689400	808	0.00205119	0	627	0	4	1	1	5.5	23.784	201	1	-2	4689400	1	+		259
H0YJ50;Q99986;H0YJJ9	Serine/threonine-protein kinase VRK1	VRK1	tr|H0YJ50|H0YJ50_HUMAN Serine/threonine-protein kinase VRK1 (Fragment) OS=Homo sapiens OX=9606 GN=VRK1 PE=1 SV=1;sp|Q99986|VRK1_HUMAN Serine/threonine-protein kinase VRK1 OS=Homo sapiens OX=9606 GN=VRK1 PE=1 SV=1;tr|H0YJJ9|H0YJJ9_HUMAN Serine/threonine-pro	0	657	0	4662500	809	0.00203942	0	627	0	3	2	2	12.5	26.582	232	0	12.007	4662500	2			375
Q12797;E5RHJ2;E5RHK2;G3XAN5;E5RG29;E5RG56	Aspartyl/asparaginyl beta-hydroxylase	ASPH	sp|Q12797|ASPH_HUMAN Aspartyl/asparaginyl beta-hydroxylase OS=Homo sapiens OX=9606 GN=ASPH PE=1 SV=3;tr|E5RHJ2|E5RHJ2_HUMAN Aspartyl/asparaginyl beta-hydroxylase OS=Homo sapiens OX=9606 GN=ASPH PE=1 SV=1;tr|E5RHK2|E5RHK2_HUMAN Aspartyl/asparaginyl beta-hyd	0	657	0	4612700	810	0.00201764	0	627	0	6	2	2	5	85.862	758	0	37.679	4612700	3			923
Q92615	La-related protein 4B	LARP4B	sp|Q92615|LAR4B_HUMAN La-related protein 4B OS=Homo sapiens OX=9606 GN=LARP4B PE=1 SV=3	0	657	0	4596600	811	0.0020106	0	627	0	1	2	2	4.5	80.551	738	0.0029499	10.621	4596600	2			1080
D6RJA0;Q8WTS6	Histone-lysine N-methyltransferase SETD7	SETD7	tr|D6RJA0|D6RJA0_HUMAN [Histone H3]-lysine(4) N-methyltransferase OS=Homo sapiens OX=9606 GN=SETD7 PE=1 SV=1;sp|Q8WTS6|SETD7_HUMAN Histone-lysine N-methyltransferase SETD7 OS=Homo sapiens OX=9606 GN=SETD7 PE=1 SV=1	0	657	0	4586400	812	0.00200614	0	627	0	2	1	1	4.4	40.127	362	0.0027855	7.359	4586400	2			258
A0A0C4DGI3;B4DJV2;O75390;F8VRP1;F8VX68;H0YIC4;F8VRI6;F8VPF9;F8VPA1;F8VR34;F8W1S4;H0YH82	Citrate synthase;Citrate synthase, mitochondrial	CS	tr|A0A0C4DGI3|A0A0C4DGI3_HUMAN Citrate synthase OS=Homo sapiens OX=9606 GN=CS PE=1 SV=1;tr|B4DJV2|B4DJV2_HUMAN Citrate synthase OS=Homo sapiens OX=9606 GN=CS PE=1 SV=1;sp|O75390|CISY_HUMAN Citrate synthase, mitochondrial OS=Homo sapiens OX=9606 GN=CS PE=1	0	657	0	4582600	813	0.00200447	0	627	0	12	2	2	12.8	44.703	400	0	13.365	4582600	2			71
E9PHS0;O43813	LanC-like protein 1	LANCL1	tr|E9PHS0|E9PHS0_HUMAN Glutathione S-transferase LANCL1 (Fragment) OS=Homo sapiens OX=9606 GN=LANCL1 PE=1 SV=1;sp|O43813|LANC1_HUMAN Glutathione S-transferase LANCL1 OS=Homo sapiens OX=9606 GN=LANCL1 PE=1 SV=1	0	657	0	4575000	814	0.00200115	0	627	0	2	1	1	11.2	22.042	196	0.0052817	6.5676	4575000	2			293
Q9BXW7	Cat eye syndrome critical region protein 5	CECR5	sp|Q9BXW7|HDHD5_HUMAN Haloacid dehalogenase-like hydrolase domain-containing 5 OS=Homo sapiens OX=9606 GN=HDHD5 PE=1 SV=1	0	657	0	4529400	815	0.0019812	0	627	0	1	1	1	4	46.321	423	0.0045413	6.8354	4529400	2			1142
G5EA36;P30260;I3L2Z8;I3L394;I3L3H6;F6QPS0	Cell division cycle protein 27 homolog	CDC27	tr|G5EA36|G5EA36_HUMAN Cell division cycle 27, isoform CRA_c OS=Homo sapiens OX=9606 GN=CDC27 PE=1 SV=1;sp|P30260|CDC27_HUMAN Cell division cycle protein 27 homolog OS=Homo sapiens OX=9606 GN=CDC27 PE=1 SV=2;tr|I3L2Z8|I3L2Z8_HUMAN Cell division cycle prote	0	657	0	4522500	816	0.00197819	0	627	0	6	2	2	3	91.737	823	0	12.376	4522500	2			358
A0A2R8Y7U1;A0A2R8YGD1;A0A2R8YD45;O14773	Tripeptidyl-peptidase 1	TPP1	tr|A0A2R8Y7U1|A0A2R8Y7U1_HUMAN Tripeptidyl aminopeptidase (Fragment) OS=Homo sapiens OX=9606 GN=TPP1 PE=1 SV=1;tr|A0A2R8YGD1|A0A2R8YGD1_HUMAN Tripeptidyl aminopeptidase OS=Homo sapiens OX=9606 GN=TPP1 PE=1 SV=1;tr|A0A2R8YD45|A0A2R8YD45_HUMAN Tripeptidyl-pe	0	657	0	4513600	817	0.00197429	0	627	0	4	2	2	10.2	43.568	400	0	12.648	4513600	2			113
P13861;C9J830;H7C330;H7C4A9;H7C1L0;P31323	cAMP-dependent protein kinase type II-alpha regulatory subunit	PRKAR2A	sp|P13861|KAP2_HUMAN cAMP-dependent protein kinase type II-alpha regulatory subunit OS=Homo sapiens OX=9606 GN=PRKAR2A PE=1 SV=2;tr|C9J830|C9J830_HUMAN cAMP-dependent protein kinase type II-alpha regulatory subunit (Fragment) OS=Homo sapiens OX=9606 GN=PRK	313000	386	0.00336124	4473700	818	0.00195684	49968	620	0.000384217	6	5	5	19.3	45.518	404	0	33.089	4836700	9			638
Q9UNX4	WD repeat-containing protein 3	WDR3	sp|Q9UNX4|WDR3_HUMAN WD repeat-containing protein 3 OS=Homo sapiens OX=9606 GN=WDR3 PE=1 SV=1	0	657	0	4448800	819	0.00194595	0	627	0	1	2	2	2.5	106.1	943	0.0010101	11.338	4448800	3			1220
Q9Y3B4	Splicing factor 3B subunit 6	SF3B6	sp|Q9Y3B4|SF3B6_HUMAN Splicing factor 3B subunit 6 OS=Homo sapiens OX=9606 GN=SF3B6 PE=1 SV=1	119260	541	0.00128071	4438500	820	0.00194144	69908	615	0.000537541	1	2	2	20.8	14.585	125	0	32.827	4627700	4			1231
P18077;F8WBS5;F8WB72;C9K025	60S ribosomal protein L35a	RPL35A	sp|P18077|RL35A_HUMAN 60S ribosomal protein L35a OS=Homo sapiens OX=9606 GN=RPL35A PE=1 SV=2;tr|F8WBS5|F8WBS5_HUMAN 60S ribosomal protein L35a OS=Homo sapiens OX=9606 GN=RPL35A PE=1 SV=1;tr|F8WB72|F8WB72_HUMAN 60S ribosomal protein L35a OS=Homo sapiens OX=	136380	516	0.00146455	4436900	821	0.00194074	600620	376	0.00461832	4	3	3	16.4	12.538	110	0	16.69	5173900	4			655
Q96MX6	WD repeat-containing protein 92	WDR92	sp|Q96MX6|WDR92_HUMAN WD repeat-containing protein 92 OS=Homo sapiens OX=9606 GN=WDR92 PE=1 SV=1	0	657	0	4421500	822	0.00193401	306300	482	0.00235522	1	3	3	11.8	39.74	357	0	18.428	4727800	3			1105
A0A3B3IUB9;Q9NR09	Baculoviral IAP repeat-containing protein 6	BIRC6	tr|A0A3B3IUB9|A0A3B3IUB9_HUMAN Baculoviral IAP repeat-containing protein 6 (Fragment) OS=Homo sapiens OX=9606 GN=BIRC6 PE=1 SV=1;sp|Q9NR09|BIRC6_HUMAN Baculoviral IAP repeat-containing protein 6 OS=Homo sapiens OX=9606 GN=BIRC6 PE=1 SV=2	160940	489	0.0017283	4408100	823	0.00192815	0	627	0	2	4	4	1.8	419.02	3842	0	36.443	4569000	4			133
Q6UXN9	WD repeat-containing protein 82	WDR82	sp|Q6UXN9|WDR82_HUMAN WD repeat-containing protein 82 OS=Homo sapiens OX=9606 GN=WDR82 PE=1 SV=1	0	657	0	4373200	824	0.00191288	0	627	0	1	2	2	10.2	35.079	313	0	13.095	4373200	2			1029
P16403;P10412;P16402	Histone H1.2;Histone H1.4;Histone H1.3	HIST1H1C;HIST1H1E;HIST1H1D	sp|P16403|H12_HUMAN Histone H1.2 OS=Homo sapiens OX=9606 GN=H1-2 PE=1 SV=2;sp|P10412|H14_HUMAN Histone H1.4 OS=Homo sapiens OX=9606 GN=H1-4 PE=1 SV=2;sp|P16402|H13_HUMAN Histone H1.3 OS=Homo sapiens OX=9606 GN=H1-3 PE=1 SV=2	737100	266	0.00791555	4358700	825	0.00190654	191020	551	0.0014688	3	2	2	6.1	21.364	213	0	11.84	5286800	5			612
Q8TC07;C9JA93	TBC1 domain family member 15	TBC1D15	sp|Q8TC07|TBC15_HUMAN TBC1 domain family member 15 OS=Homo sapiens OX=9606 GN=TBC1D15 PE=1 SV=2;tr|C9JA93|C9JA93_HUMAN TBC1 domain family member 15 (Fragment) OS=Homo sapiens OX=9606 GN=TBC1D15 PE=1 SV=1	0	657	0	4333700	826	0.0018956	0	627	0	2	3	3	5.4	79.49	691	0	42.153	4333700	3			1069
A0A590UJG2;H3BPE1;H3BQK9;Q9UPN3;H0Y390;H0YBX0;H0Y4F5;A0A669KB06;H0Y314;A0A494C1U5;E9PLY0;A0A494C073;E9PLY5;E9PNZ4;A0A5F9ZGX0;A0A0U1RQJ2;E9PHM6;F6QMI7;F8W9J4;Q03001	Microtubule-actin cross-linking factor 1, isoforms 1/2/3/5	MACF1	tr|A0A590UJG2|A0A590UJG2_HUMAN Microtubule-actin cross-linking factor 1, isoforms 1/2/3/5 OS=Homo sapiens OX=9606 GN=MACF1 PE=1 SV=1;tr|H3BPE1|H3BPE1_HUMAN Microtubule-actin cross-linking factor 1, isoforms 1/2/3/5 OS=Homo sapiens OX=9606 GN=MACF1 PE=1 SV=	19118	654	0.000205304	4305900	827	0.00188344	229430	532	0.00176415	20	5	5	1.5	614.89	5379	0	53.816	4554500	8			144
O60306;H0YH15	Intron-binding protein aquarius	AQR	sp|O60306|AQR_HUMAN RNA helicase aquarius OS=Homo sapiens OX=9606 GN=AQR PE=1 SV=4	0	657	0	4286500	828	0.00187496	0	627	0	2	3	3	4	171.29	1485	0	19.12	4286500	3			527
Q9UHV9	Prefoldin subunit 2	PFDN2	sp|Q9UHV9|PFD2_HUMAN Prefoldin subunit 2 OS=Homo sapiens OX=9606 GN=PFDN2 PE=1 SV=1	134740	519	0.00144694	4232100	829	0.00185116	354540	454	0.00272615	1	2	2	22.1	16.648	154	0	13.403	4721400	4			1204
Q13451	Peptidyl-prolyl cis-trans isomerase FKBP5;Peptidyl-prolyl cis-trans isomerase FKBP5, N-terminally processed	FKBP5	sp|Q13451|FKBP5_HUMAN Peptidyl-prolyl cis-trans isomerase FKBP5 OS=Homo sapiens OX=9606 GN=FKBP5 PE=1 SV=2	0	657	0	4218600	830	0.00184526	147730	578	0.00113593	1	2	2	9.4	51.212	457	0	13.977	4366300	2			943
H3BNV7;Q9Y3D0;J3KS95	Mitotic spindle-associated MMXD complex subunit MIP18	FAM96B	tr|H3BNV7|H3BNV7_HUMAN Cytosolic iron-sulfur assembly component 2B (Fragment) OS=Homo sapiens OX=9606 GN=CIAO2B PE=1 SV=1;sp|Q9Y3D0|CIA2B_HUMAN Cytosolic iron-sulfur assembly component 2B OS=Homo sapiens OX=9606 GN=CIAO2B PE=1 SV=1;tr|J3KS95|J3KS95_HUMAN C	57467	630	0.000617125	4215500	831	0.0018439	0	627	0	3	2	2	26.7	17.461	161	0	14.438	4272900	2			387
P40938	Replication factor C subunit 3	RFC3	sp|P40938|RFC3_HUMAN Replication factor C subunit 3 OS=Homo sapiens OX=9606 GN=RFC3 PE=1 SV=2	0	657	0	4184300	832	0.00183025	0	627	0	1	1	1	5.1	40.556	356	0.0059727	6.3668	4184300	1			752
Q96I24;A0A494C1K6	Far upstream element-binding protein 3	FUBP3	sp|Q96I24|FUBP3_HUMAN Far upstream element-binding protein 3 OS=Homo sapiens OX=9606 GN=FUBP3 PE=1 SV=2	96964	569	0.00104127	4154000	833	0.001817	116740	600	0.000897644	2	3	3	6.1	61.64	572	0	21.98	4367700	4			1101
A0A087X1D8;A0A087WVN4;P14324	Farnesyl pyrophosphate synthase	FDPS	tr|A0A087X1D8|A0A087X1D8_HUMAN Farnesyl pyrophosphate synthase (Fragment) OS=Homo sapiens OX=9606 GN=FDPS PE=1 SV=1;tr|A0A087WVN4|A0A087WVN4_HUMAN Farnesyl pyrophosphate synthase (Fragment) OS=Homo sapiens OX=9606 GN=FDPS PE=1 SV=1;sp|P14324|FPPS_HUMAN Far	0	657	0	4151600	834	0.00181595	0	627	0	3	1	1	7.5	20.033	174	0.0028116	7.5261	4151600	1			25
Q9UKN8;F2Z356	General transcription factor 3C polypeptide 4	GTF3C4	sp|Q9UKN8|TF3C4_HUMAN General transcription factor 3C polypeptide 4 OS=Homo sapiens OX=9606 GN=GTF3C4 PE=1 SV=2;tr|F2Z356|F2Z356_HUMAN General transcription factor 3C polypeptide 4 OS=Homo sapiens OX=9606 GN=GTF3C4 PE=1 SV=1	0	657	0	4114500	835	0.00179972	0	627	0	2	2	2	4.5	91.981	822	0	14.339	4114500	2			1210
C9J7E5;Q9Y5L0;E9PFH4	Transportin-3	TNPO3	tr|C9J7E5|C9J7E5_HUMAN Transportin-3 OS=Homo sapiens OX=9606 GN=TNPO3 PE=1 SV=1;sp|Q9Y5L0|TNPO3_HUMAN Transportin-3 OS=Homo sapiens OX=9606 GN=TNPO3 PE=1 SV=3;tr|E9PFH4|E9PFH4_HUMAN Transportin-3 OS=Homo sapiens OX=9606 GN=TNPO3 PE=1 SV=1	0	657	0	4094100	836	0.0017908	0	627	0	3	3	3	5.1	108.05	957	0	34.758	4094100	5			218
Q13637	Ras-related protein Rab-32	RAB32	sp|Q13637|RAB32_HUMAN Ras-related protein Rab-32 OS=Homo sapiens OX=9606 GN=RAB32 PE=1 SV=3	0	657	0	4081600	837	0.00178533	0	627	0	1	2	1	9.8	24.997	225	0	13.788	4081600	3			946
A0A0G2JL47;A0A024RCR6;A0A0G2JK23;P46379;F6S6P2;X6REW1;A0A0G2JJM1;H0Y4L1;H0Y710	Large proline-rich protein BAG6	BAT3;BAG6	tr|A0A0G2JL47|A0A0G2JL47_HUMAN BCL2-associated athanogene 6 OS=Homo sapiens OX=9606 GN=BAG6 PE=1 SV=1;tr|A0A024RCR6|A0A024RCR6_HUMAN BCL2-associated athanogene 6 OS=Homo sapiens OX=9606 GN=BAG6 PE=1 SV=1;tr|A0A0G2JK23|A0A0G2JK23_HUMAN BCL2-associated athan	81963	590	0.000880182	4032900	838	0.00176403	0	627	0	9	3	3	3.7	113.46	1077	0	17.643	4114900	3			4
A6NCC9;E9PME3;C9JHT9;C9JJV1;Q9Y5U2;E9PL88;C9JDU0	Protein TSSC4	TSSC4	tr|A6NCC9|A6NCC9_HUMAN Protein TSSC4 OS=Homo sapiens OX=9606 GN=TSSC4 PE=1 SV=1;tr|E9PME3|E9PME3_HUMAN Protein TSSC4 (Fragment) OS=Homo sapiens OX=9606 GN=TSSC4 PE=1 SV=1;tr|C9JHT9|C9JHT9_HUMAN Protein TSSC4 (Fragment) OS=Homo sapiens OX=9606 GN=TSSC4 PE=1	0	657	0	4031500	839	0.00176342	0	627	0	7	3	3	20.5	13.847	127	0	18.666	4031500	4			167
A0A6Q8PF69;A0A6Q8PGR0;A0A6Q8PHA0;A0A6Q8PFN8;A0A6Q8PH48;A0A6Q8PHI5;A0A6Q8PFB7;A0A6Q8PEX6;A0A6Q8PG86;A0A6Q8PFH9;A0A6Q8PHF4;A0A6Q8PHC9;O95163;A0A6Q8PFX1;A0A6Q8PFC8;H0YDF3;A0A6Q8PH36;A0A6Q8PGC4;A0A6Q8PGA6;F5H2T0;A0A6Q8PGW3;A0A6Q8PF66	Elongator complex protein 1	IKBKAP	tr|A0A6Q8PF69|A0A6Q8PF69_HUMAN IkappaB kinase complex-associated protein OS=Homo sapiens OX=9606 GN=ELP1 PE=1 SV=1;tr|A0A6Q8PGR0|A0A6Q8PGR0_HUMAN IkappaB kinase complex-associated protein OS=Homo sapiens OX=9606 GN=ELP1 PE=1 SV=1;tr|A0A6Q8PHA0|A0A6Q8PHA0_H	0	657	0	4018400	840	0.00175769	0	627	0	22	2	2	3.6	90.907	810	0	12.562	4018400	2			154
A0A087WZG9;B4DSP0;A0A087WXK2;A0A087WUL4;A0A087WX23;Q86TG7;A0A087WYS2	Retrotransposon-derived protein PEG10	PEG10	tr|A0A087WZG9|A0A087WZG9_HUMAN Retrotransposon-derived protein PEG10 OS=Homo sapiens OX=9606 GN=PEG10 PE=1 SV=1;tr|B4DSP0|B4DSP0_HUMAN HCG1642748, isoform CRA_b OS=Homo sapiens OX=9606 GN=PEG10 PE=1 SV=1;tr|A0A087WXK2|A0A087WXK2_HUMAN Retrotransposon-deriv	0	657	0	4004100	841	0.00175143	291200	487	0.00223911	7	3	3	15.9	40.471	359	0	20.556	4295300	4			19
A0A6Q8PGG1;A0A6Q8PGH7;A0A6Q8PFA6;A0A6Q8PG37;A0A6Q8PH57;O00139;D6R9M0	Kinesin-like protein KIF2A	KIF2A	tr|A0A6Q8PGG1|A0A6Q8PGG1_HUMAN Kinesin-like protein KIF2A OS=Homo sapiens OX=9606 GN=KIF2A PE=1 SV=1;tr|A0A6Q8PGH7|A0A6Q8PGH7_HUMAN Kinesin-like protein (Fragment) OS=Homo sapiens OX=9606 GN=KIF2A PE=1 SV=1;tr|A0A6Q8PFA6|A0A6Q8PFA6_HUMAN Kinesin-like prote	0	657	0	3999700	842	0.00174951	0	627	0	7	2	2	2.9	67.147	590	0.001994	11.029	3999700	2			157
K7EQF2		PLCD3	tr|K7EQF2|K7EQF2_HUMAN 1-phosphatidylinositol 4,5-bisphosphate phosphodiesterase delta-3 (Fragment) OS=Homo sapiens OX=9606 GN=PLCD3 PE=1 SV=1	0	657	0	3956900	843	0.00173079	0	627	0	1	1	1	6.7	23.001	195	1	-2	3956900	1	+		437
Q9NXR7;C9J2G0;A0A075B7D2;F8W733	BRCA1-A complex subunit BRE	BRE	sp|Q9NXR7|BABA2_HUMAN BRISC and BRCA1-A complex member 2 OS=Homo sapiens OX=9606 GN=BABAM2 PE=1 SV=2;tr|C9J2G0|C9J2G0_HUMAN BRCA1-A complex subunit BRE (Fragment) OS=Homo sapiens OX=9606 GN=BABAM2 PE=1 SV=1;tr|A0A075B7D2|A0A075B7D2_HUMAN BRCA1-A complex su	0	657	0	3954500	844	0.00172974	0	627	0	4	2	2	7.3	43.551	383	0	11.779	3954500	2			1179
A0A1W2PS52;P04080	Cystatin-B	CSTB	tr|A0A1W2PS52|A0A1W2PS52_HUMAN Cystatin-B OS=Homo sapiens OX=9606 GN=CSTB PE=1 SV=1;sp|P04080|CYTB_HUMAN Cystatin-B OS=Homo sapiens OX=9606 GN=CSTB PE=1 SV=2	0	657	0	3941900	845	0.00172423	0	627	0	2	1	1	14.5	9.0182	83	0.0027701	7.1968	3941900	2			96
P29966	Myristoylated alanine-rich C-kinase substrate	MARCKS	sp|P29966|MARCS_HUMAN Myristoylated alanine-rich C-kinase substrate OS=Homo sapiens OX=9606 GN=MARCKS PE=1 SV=4	0	657	0	3933900	846	0.00172073	0	627	0	1	2	2	15.1	31.554	332	0	16.396	3933900	2			709
C9JZN1;C9JIS1;C9JXA5;P62879;H7C5J5;A0A6Q8PFW8;E7EP32;A0A6Q8PG88;A0A6Q8PFE0;A0A6Q8PFV8;Q9HAV0	Guanine nucleotide-binding protein G(I)/G(S)/G(T) subunit beta-2;Guanine nucleotide-binding protein subunit beta-4	GNB2;GNB4	tr|C9JZN1|C9JZN1_HUMAN Guanine nucleotide-binding protein G(I)/G(S)/G(T) subunit beta-2 (Fragment) OS=Homo sapiens OX=9606 GN=GNB2 PE=1 SV=1;tr|C9JIS1|C9JIS1_HUMAN Guanine nucleotide-binding protein G(I)/G(S)/G(T) subunit beta-2 (Fragment) OS=Homo sapiens	0	657	0	3924600	847	0.00171666	0	627	0	11	2	2	21.1	17.032	152	0	22.12	3924600	2			226
Q09161;X6R941	Nuclear cap-binding protein subunit 1	NCBP1	sp|Q09161|NCBP1_HUMAN Nuclear cap-binding protein subunit 1 OS=Homo sapiens OX=9606 GN=NCBP1 PE=1 SV=1	0	657	0	3913500	848	0.0017118	0	627	0	2	3	3	5.4	91.838	790	0	18.697	3913500	5			918
M0R1B5;E9PJS0;M0R026;A1L0T0;E9PL44	Acetolactate synthase-like protein	ILVBL	tr|M0R1B5|M0R1B5_HUMAN 2-hydroxyacyl-CoA lyase 2 (Fragment) OS=Homo sapiens OX=9606 GN=ILVBL PE=1 SV=8;tr|E9PJS0|E9PJS0_HUMAN 2-hydroxyacyl-CoA lyase 2 (Fragment) OS=Homo sapiens OX=9606 GN=ILVBL PE=1 SV=1;tr|M0R026|M0R026_HUMAN 2-hydroxyacyl-CoA lyase 2 O	0	657	0	3906300	849	0.00170865	0	627	0	5	2	2	24.2	17.494	165	0	11.774	3906300	1			164
Q5T7U0;H7BY84;Q5T7U1;Q9Y5Q8	General transcription factor 3C polypeptide 5	GTF3C5	tr|Q5T7U0|Q5T7U0_HUMAN General transcription factor 3C polypeptide 5 (Fragment) OS=Homo sapiens OX=9606 GN=GTF3C5 PE=1 SV=1;tr|H7BY84|H7BY84_HUMAN General transcription factor 3C polypeptide 5 OS=Homo sapiens OX=9606 GN=GTF3C5 PE=1 SV=2;tr|Q5T7U1|Q5T7U1_HU	0	657	0	3873000	850	0.00169409	0	627	0	4	1	1	3.6	26.267	224	0.0053144	6.6416	3873000	1			391
Q96K17	Transcription factor BTF3 homolog 4	BTF3L4	sp|Q96K17|BT3L4_HUMAN Transcription factor BTF3 homolog 4 OS=Homo sapiens OX=9606 GN=BTF3L4 PE=1 SV=1	61554	625	0.000661015	3868800	851	0.00169225	610200	373	0.00469198	1	2	2	19	17.27	158	0	14.558	4540600	7			1103
P47813;X6RAC9;O14602;A6NJH9	Eukaryotic translation initiation factor 1A, X-chromosomal;Eukaryotic translation initiation factor 1A, Y-chromosomal	EIF1AX;EIF1AY	sp|P47813|IF1AX_HUMAN Eukaryotic translation initiation factor 1A, X-chromosomal OS=Homo sapiens OX=9606 GN=EIF1AX PE=1 SV=2;tr|X6RAC9|X6RAC9_HUMAN Eukaryotic translation initiation factor 4C OS=Homo sapiens OX=9606 GN=EIF1AX PE=1 SV=1;sp|O14602|IF1AY_HUMA	0	657	0	3854600	852	0.00168604	0	627	0	4	3	3	24.3	16.46	144	0	17.311	3854600	3			774
Q14676	Mediator of DNA damage checkpoint protein 1	MDC1	sp|Q14676|MDC1_HUMAN Mediator of DNA damage checkpoint protein 1 OS=Homo sapiens OX=9606 GN=MDC1 PE=1 SV=3	0	657	0	3848500	853	0.00168337	0	627	0	1	2	2	1.9	226.66	2089	0	13.835	3848500	3			960
Q9H295	Dendritic cell-specific transmembrane protein	DCSTAMP	sp|Q9H295|DCSTP_HUMAN Dendritic cell-specific transmembrane protein OS=Homo sapiens OX=9606 GN=DCSTAMP PE=1 SV=1	0	657	0	3839300	854	0.00167935	0	627	0	1	1	1	2.6	53.392	470	1	-2	3839300	0	+		1150
P15927;Q5TEJ7;Q5TEJ0	Replication protein A 32 kDa subunit	RPA2	sp|P15927|RFA2_HUMAN Replication protein A 32 kDa subunit OS=Homo sapiens OX=9606 GN=RPA2 PE=1 SV=1;tr|Q5TEJ7|Q5TEJ7_HUMAN Replication protein A 32 kDa subunit (Fragment) OS=Homo sapiens OX=9606 GN=RPA2 PE=1 SV=1	79841	596	0.000857395	3797700	855	0.00166115	0	627	0	3	3	3	15.6	29.247	270	0	55.094	3877500	5			648
H0YDU8;P53041	Serine/threonine-protein phosphatase;Serine/threonine-protein phosphatase 5	PPP5C	tr|H0YDU8|H0YDU8_HUMAN Serine/threonine-protein phosphatase (Fragment) OS=Homo sapiens OX=9606 GN=PPP5C PE=1 SV=1;sp|P53041|PPP5_HUMAN Serine/threonine-protein phosphatase 5 OS=Homo sapiens OX=9606 GN=PPP5C PE=1 SV=1	0	657	0	3796100	856	0.00166045	0	627	0	2	1	1	2.1	55.096	485	0.0028763	8.4848	3796100	1			368
Q9P2I0;H0YJF4	Cleavage and polyadenylation specificity factor subunit 2	CPSF2	sp|Q9P2I0|CPSF2_HUMAN Cleavage and polyadenylation specificity factor subunit 2 OS=Homo sapiens OX=9606 GN=CPSF2 PE=1 SV=2	71338	605	0.000766083	3786200	857	0.00165612	0	627	0	2	5	5	9.2	88.486	782	0	37.906	3857600	7			1187
A0A2R8Y765;J3QKS7;A0A2R8Y7U4;A0A2U3TZQ7;A0A2R8Y7I9;A0A2R8Y4T4;A0A2R8YES3;A0A2R8Y855;B4DGM3;Q969G3;J3QR61;J3KT85;A0A2R8YD78	SWI/SNF-related matrix-associated actin-dependent regulator of chromatin subfamily E member 1	SMARCE1	tr|A0A2R8Y765|A0A2R8Y765_HUMAN SWI/SNF-related matrix-associated actin-dependent regulator of chromatin subfamily E member 1 OS=Homo sapiens OX=9606 GN=SMARCE1 PE=1 SV=1;tr|J3QKS7|J3QKS7_HUMAN SWI/SNF-related matrix-associated actin-dependent regulator of	0	657	0	3758400	858	0.00164396	190760	552	0.0014668	13	3	3	15.2	32.319	277	0	22.215	3949200	3			103
C9JIG9;O95747	Serine/threonine-protein kinase OSR1	OXSR1	tr|C9JIG9|C9JIG9_HUMAN Non-specific serine/threonine protein kinase OS=Homo sapiens OX=9606 GN=OXSR1 PE=1 SV=1;sp|O95747|OXSR1_HUMAN Serine/threonine-protein kinase OSR1 OS=Homo sapiens OX=9606 GN=OXSR1 PE=1 SV=1	0	657	0	3754900	859	0.00164243	0	627	0	2	2	2	4.3	51.856	468	0	11.703	3754900	3			225
O75351;K7EL71;K7EKZ3	Vacuolar protein sorting-associated protein 4B	VPS4B	sp|O75351|VPS4B_HUMAN Vacuolar protein sorting-associated protein 4B OS=Homo sapiens OX=9606 GN=VPS4B PE=1 SV=2;tr|K7EL71|K7EL71_HUMAN Vacuolar protein sorting-associated protein 4B OS=Homo sapiens OX=9606 GN=VPS4B PE=1 SV=1;tr|K7EKZ3|K7EKZ3_HUMAN Vacuolar	0	657	0	3751000	860	0.00164072	0	627	0	3	2	2	8.1	49.301	444	0	11.877	3751000	2			541
B4DY09;Q12905	Interleukin enhancer-binding factor 2	ILF2	tr|B4DY09|B4DY09_HUMAN Interleukin enhancer-binding factor 2 OS=Homo sapiens OX=9606 GN=ILF2 PE=1 SV=1;sp|Q12905|ILF2_HUMAN Interleukin enhancer-binding factor 2 OS=Homo sapiens OX=9606 GN=ILF2 PE=1 SV=2	0	657	0	3746300	861	0.00163867	0	627	0	2	2	2	10.5	38.91	352	0	13.221	3746300	2			193
E7EQY4;E7EV10;Q9BTC8;E9PCS8;E9PF88;F6RRE2	Metastasis-associated protein MTA3	MTA3	tr|E7EQY4|E7EQY4_HUMAN Metastasis-associated protein MTA3 OS=Homo sapiens OX=9606 GN=MTA3 PE=1 SV=1;tr|E7EV10|E7EV10_HUMAN Metastasis-associated protein MTA3 OS=Homo sapiens OX=9606 GN=MTA3 PE=1 SV=1;sp|Q9BTC8|MTA3_HUMAN Metastasis-associated protein MTA3	0	657	0	3740000	862	0.00163591	0	627	0	6	4	2	9.7	58.726	514	0	12.554	3740000	2			272
Q7Z7L1;C9JDG6;C9J902;K7ER38;C9JUT2;K7EIM3	Schlafen family member 11	SLFN11	sp|Q7Z7L1|SLN11_HUMAN Schlafen family member 11 OS=Homo sapiens OX=9606 GN=SLFN11 PE=1 SV=2;tr|C9JDG6|C9JDG6_HUMAN Schlafen family member 11 (Fragment) OS=Homo sapiens OX=9606 GN=SLFN11 PE=1 SV=1;tr|C9J902|C9J902_HUMAN Schlafen family member 11 (Fragment)	0	657	0	3735700	863	0.00163403	0	627	0	6	2	2	5.1	102.83	901	0	12.709	3735700	1			1046
K7ES20;K7ENC6;J3QRG6;P42772;P42771	Cyclin-dependent kinase 4 inhibitor B;Cyclin-dependent kinase inhibitor 2A	CDKN2A;CDKN2B	tr|K7ES20|K7ES20_HUMAN Cyclin-dependent kinase inhibitor 2A OS=Homo sapiens OX=9606 GN=CDKN2A PE=1 SV=1;tr|K7ENC6|K7ENC6_HUMAN Cyclin-dependent kinase inhibitor 2A OS=Homo sapiens OX=9606 GN=CDKN2A PE=1 SV=1;tr|J3QRG6|J3QRG6_HUMAN Cyclin-dependent kinase i	0	657	0	3725900	864	0.00162975	0	627	0	5	1	1	21.2	11.075	104	0.0060711	6.454	3725900	1			418
Q96PK6;A0A0A6YYI9;F8WDX3;A0A0A0MSL8;B8ZZ74	RNA-binding protein 14	RBM14	sp|Q96PK6|RBM14_HUMAN RNA-binding protein 14 OS=Homo sapiens OX=9606 GN=RBM14 PE=1 SV=2	373880	350	0.00401501	3722300	865	0.00162817	328090	463	0.00252277	5	4	4	9.3	69.491	669	0	33.788	4424300	7			1107
P36957;Q86SW4;H0YJF9;G3V5M3;G3V3F0	Dihydrolipoyllysine-residue succinyltransferase component of 2-oxoglutarate dehydrogenase complex, mitochondrial	DLST	sp|P36957|ODO2_HUMAN Dihydrolipoyllysine-residue succinyltransferase component of 2-oxoglutarate dehydrogenase complex, mitochondrial OS=Homo sapiens OX=9606 GN=DLST PE=1 SV=4	1933400	171	0.0207623	3719200	866	0.00162682	4728400	144	0.0363579	5	8	8	27.4	48.755	453	0	86.132	10381000	21			739
P23378	Glycine dehydrogenase (decarboxylating), mitochondrial	GLDC	sp|P23378|GCSP_HUMAN Glycine dehydrogenase (decarboxylating), mitochondrial OS=Homo sapiens OX=9606 GN=GLDC PE=1 SV=2	0	657	0	3709400	867	0.00162253	0	627	0	1	1	1	2.2	112.73	1020	0	18.402	3709400	2			678
Q9NWS6	Protein FAM118A	FAM118A	sp|Q9NWS6|F118A_HUMAN Protein FAM118A OS=Homo sapiens OX=9606 GN=FAM118A PE=1 SV=2	0	657	0	3707500	868	0.0016217	0	627	0	1	1	1	2.8	40.269	357	0.0091667	6.2179	3707500	1			1176
Q8N3U4	Cohesin subunit SA-2	STAG2	sp|Q8N3U4|STAG2_HUMAN Cohesin subunit SA-2 OS=Homo sapiens OX=9606 GN=STAG2 PE=1 SV=3	101520	561	0.0010902	3703000	869	0.00161973	0	627	0	1	2	2	2.1	141.32	1231	0	14.475	3804600	4			1058
A0A590UK28;A0A590UKA4;A0A590UJ22;S4R3E3;A0A590UJS2;A0A590UJQ2;A0A590UJG5;A0A590UJJ0;A0A590UKB4;A0A590UJQ9;A0A590UJI6;A0A590UJR6;A0A590UJB0;A0A590UJF0;B0AZR9;A0A590UJ58;A0A0A0MR13;P63092;Q5JWF2;A0A590UJY8;A0A590UJY2	Guanine nucleotide-binding protein G(s) subunit alpha isoforms short;Guanine nucleotide-binding protein G(s) subunit alpha isoforms XLas	GNAS	tr|A0A590UK28|A0A590UK28_HUMAN Guanine nucleotide-binding protein G(s) subunit alpha isoforms short (Fragment) OS=Homo sapiens OX=9606 GN=GNAS PE=1 SV=1;tr|A0A590UKA4|A0A590UKA4_HUMAN Guanine nucleotide-binding protein G(s) subunit alpha isoforms short (Fr	0	657	0	3699100	870	0.00161802	0	627	0	21	2	2	26.8	14.645	127	0	12.509	3699100	3			51
Q15459	Splicing factor 3A subunit 1	SF3A1	sp|Q15459|SF3A1_HUMAN Splicing factor 3A subunit 1 OS=Homo sapiens OX=9606 GN=SF3A1 PE=1 SV=1	0	657	0	3692900	871	0.00161531	181390	557	0.00139475	1	2	2	3.8	88.885	793	0	12.567	3874300	2			980
P00492	Hypoxanthine-guanine phosphoribosyltransferase	HPRT1	sp|P00492|HPRT_HUMAN Hypoxanthine-guanine phosphoribosyltransferase OS=Homo sapiens OX=9606 GN=HPRT1 PE=1 SV=2	0	657	0	3674100	872	0.00160709	0	627	0	1	2	2	18.8	24.579	218	0	12.943	3674100	4			575
Q92922;F8WE13	SWI/SNF complex subunit SMARCC1	SMARCC1	sp|Q92922|SMRC1_HUMAN SWI/SNF complex subunit SMARCC1 OS=Homo sapiens OX=9606 GN=SMARCC1 PE=1 SV=3;tr|F8WE13|F8WE13_HUMAN SWI/SNF complex subunit SMARCC1 OS=Homo sapiens OX=9606 GN=SMARCC1 PE=1 SV=1	0	657	0	3671300	873	0.00160586	0	627	0	2	4	2	4.8	122.87	1105	0	26.002	3671300	3			1087
O00505	Importin subunit alpha-4	KPNA3	sp|O00505|IMA4_HUMAN Importin subunit alpha-4 OS=Homo sapiens OX=9606 GN=KPNA3 PE=1 SV=2	0	657	0	3638300	874	0.00159143	0	627	0	1	1	1	6.3	57.81	521	0.0027804	7.2731	3638300	2			489
H3BT13;P62318	Small nuclear ribonucleoprotein Sm D3	SNRPD3	tr|H3BT13|H3BT13_HUMAN Small nuclear ribonucleoprotein Sm D3 OS=Homo sapiens OX=9606 GN=SNRPD3 PE=1 SV=1;sp|P62318|SMD3_HUMAN Small nuclear ribonucleoprotein Sm D3 OS=Homo sapiens OX=9606 GN=SNRPD3 PE=1 SV=1	0	657	0	3637600	875	0.00159112	0	627	0	2	1	1	33.9	6.9058	62	0.002893	8.7491	3637600	1			390
A0A2R8Y6B6;A0A087WUQ6;P07203	Glutathione peroxidase;Glutathione peroxidase 1	GPX1	tr|A0A2R8Y6B6|A0A2R8Y6B6_HUMAN Glutathione peroxidase 1 OS=Homo sapiens OX=9606 GN=GPX1 PE=1 SV=1;tr|A0A087WUQ6|A0A087WUQ6_HUMAN Glutathione peroxidase OS=Homo sapiens OX=9606 GN=GPX1 PE=1 SV=1;sp|P07203|GPX1_HUMAN Glutathione peroxidase 1 OS=Homo sapiens	0	657	0	3630000	876	0.0015878	311500	475	0.0023952	3	2	2	15.9	16.914	157	0	12.093	3941500	3			21
C9J126;P19022;A0A6Q8PG20;A0A6Q8PHJ8;A0A0G2JRA4;C9JMH2;A0A6Q8PF58;A0A087WX99;P55283	Cadherin-2;Cadherin-4	CDH2;CDH4	tr|C9J126|C9J126_HUMAN Cadherin-2 OS=Homo sapiens OX=9606 GN=CDH2 PE=1 SV=2;sp|P19022|CADH2_HUMAN Cadherin-2 OS=Homo sapiens OX=9606 GN=CDH2 PE=1 SV=4;tr|A0A6Q8PG20|A0A6Q8PG20_HUMAN Cadherin-2 (Fragment) OS=Homo sapiens OX=9606 GN=CDH2 PE=1 SV=1;tr|A0A6Q8P	436970	337	0.00469252	3594600	877	0.00157231	0	627	0	9	2	2	4.1	90.672	821	0.0010225	11.564	4031600	2			213
A0A087WVF1;Q96B23;K7EQH1	Uncharacterized protein C18orf25	C18orf25	tr|A0A087WVF1|A0A087WVF1_HUMAN Uncharacterized protein C18orf25 OS=Homo sapiens OX=9606 GN=C18orf25 PE=1 SV=1;sp|Q96B23|CR025_HUMAN Uncharacterized protein C18orf25 OS=Homo sapiens OX=9606 GN=C18orf25 PE=1 SV=3;tr|K7EQH1|K7EQH1_HUMAN Uncharacterized protei	0	657	0	3547800	878	0.00155184	0	627	0	3	2	2	13.1	29.646	275	0	12.196	3547800	2			23
Q9BVC6	Transmembrane protein 109	TMEM109	sp|Q9BVC6|TM109_HUMAN Transmembrane protein 109 OS=Homo sapiens OX=9606 GN=TMEM109 PE=1 SV=1	578590	307	0.00621335	3547400	879	0.00155167	624830	372	0.00480448	1	1	1	4.9	26.21	243	0.0028302	7.7339	4750800	4			1137
Q13085;Q59FY4;O00763	Acetyl-CoA carboxylase 1;Biotin carboxylase	ACACA	sp|Q13085|ACACA_HUMAN Acetyl-CoA carboxylase 1 OS=Homo sapiens OX=9606 GN=ACACA PE=1 SV=2;tr|Q59FY4|Q59FY4_HUMAN Acetyl-CoA carboxylase 1 (Fragment) OS=Homo sapiens OX=9606 GN=ACACA PE=1 SV=1	337530	365	0.00362466	3499200	880	0.00153058	115330	602	0.000886802	3	4	4	2.6	265.55	2346	0	36.528	3952100	5			931
Q9UGP8	Translocation protein SEC63 homolog	SEC63	sp|Q9UGP8|SEC63_HUMAN Translocation protein SEC63 homolog OS=Homo sapiens OX=9606 GN=SEC63 PE=1 SV=2	0	657	0	3483800	881	0.00152385	0	627	0	1	1	1	2	87.996	760	0.0027447	6.9874	3483800	2			1201
Q7L576;A0A0G2JQH3;A0A087WVZ5;A0A0G2JR96;A0A0G2JQT1;H0YL50;E7EW33;H7C229;E7EVJ5;Q96F07	Cytoplasmic FMR1-interacting protein 1	CYFIP1	sp|Q7L576|CYFP1_HUMAN Cytoplasmic FMR1-interacting protein 1 OS=Homo sapiens OX=9606 GN=CYFIP1 PE=1 SV=1;tr|A0A0G2JQH3|A0A0G2JQH3_HUMAN Cytoplasmic FMR1-interacting protein 1 (Fragment) OS=Homo sapiens OX=9606 GN=CYFIP1 PE=1 SV=1;tr|A0A087WVZ5|A0A087WVZ5_H	137450	515	0.00147604	3475600	882	0.00152026	0	627	0	10	3	3	2.7	145.18	1253	0	23.563	3613000	6			1040
A0A087WYJ2;M0R2B7;P28340;M0QZR8;M0QXE6;M0QXQ2;A0A2R8Y705;A0A2R8Y7K6;M0R3H8	DNA polymerase;DNA polymerase delta catalytic subunit	POLD1	tr|A0A087WYJ2|A0A087WYJ2_HUMAN DNA polymerase OS=Homo sapiens OX=9606 GN=POLD1 PE=1 SV=1;tr|M0R2B7|M0R2B7_HUMAN DNA polymerase OS=Homo sapiens OX=9606 GN=POLD1 PE=1 SV=1;sp|P28340|DPOD1_HUMAN DNA polymerase delta catalytic subunit OS=Homo sapiens OX=9606 G	67636	613	0.000726328	3426700	883	0.00149887	0	627	0	9	6	6	7.6	121.18	1083	0	38.268	3494400	8			33
A0A087WXM6;J3QQT2;J3QLC8;J3KRX5;A0A0A0MRF8;A0A0A6YYL6;P18621;A0A087WY81;J3KRB3;A0A087WWH0;J3QS96	60S ribosomal protein L17	RPL17;RPL17-C18orf32	tr|A0A087WXM6|A0A087WXM6_HUMAN 60S ribosomal protein L17 (Fragment) OS=Homo sapiens OX=9606 GN=RPL17 PE=1 SV=1;tr|J3QQT2|J3QQT2_HUMAN 60S ribosomal protein L17 (Fragment) OS=Homo sapiens OX=9606 GN=RPL17 PE=1 SV=1;tr|J3QLC8|J3QLC8_HUMAN 60S ribosomal prote	0	657	0	3421100	884	0.00149642	0	627	0	11	2	2	14.2	19.586	169	0	17.676	3421100	2			29
P30520	Adenylosuccinate synthetase isozyme 2	ADSS	sp|P30520|PURA2_HUMAN Adenylosuccinate synthetase isozyme 2 OS=Homo sapiens OX=9606 GN=ADSS2 PE=1 SV=3	60939	626	0.00065441	3420900	885	0.00149634	155190	574	0.0011933	1	2	2	7.7	50.097	456	0	14.399	3637000	6			714
A0A6Q8PHD1;A0A6Q8PFA9;A0A3B3IUC4;P06280	Alpha-galactosidase A	GLA	tr|A0A6Q8PHD1|A0A6Q8PHD1_HUMAN Alpha-galactosidase (Fragment) OS=Homo sapiens OX=9606 GN=GLA PE=1 SV=1;tr|A0A6Q8PFA9|A0A6Q8PFA9_HUMAN Alpha-galactosidase OS=Homo sapiens OX=9606 GN=GLA PE=1 SV=1;tr|A0A3B3IUC4|A0A3B3IUC4_HUMAN Alpha-galactosidase OS=Homo sa	0	657	0	3416600	886	0.00149445	0	627	0	4	1	1	5.2	39.218	343	0	11.706	3416600	2			134
Q5T7C4;P09429;D6R9A6;P26583;B2RPK0	High mobility group protein B1;High mobility group protein B2;Putative high mobility group protein B1-like 1	HMGB1;HMGB2;HMGB1P1	tr|Q5T7C4|Q5T7C4_HUMAN High mobility group protein B1 OS=Homo sapiens OX=9606 GN=HMGB1 PE=1 SV=1;sp|P09429|HMGB1_HUMAN High mobility group protein B1 OS=Homo sapiens OX=9606 GN=HMGB1 PE=1 SV=3;tr|D6R9A6|D6R9A6_HUMAN High mobility group protein B2 (Fragment	155050	494	0.00166505	3403100	887	0.00148855	0	627	0	5	2	2	16.5	18.311	158	0	15.677	3558100	2			605
A0A6Q8PFE7;A0A6Q8PF43;A0A6Q8PHJ6;A0A6Q8PHA6;A0A6Q8PH65;A0A6Q8PGY2;A0A6Q8PFK8;A0A6Q8PGK1;P04792	Heat shock protein beta-1	HSPB1	tr|A0A6Q8PFE7|A0A6Q8PFE7_HUMAN Heat shock protein beta-1 OS=Homo sapiens OX=9606 GN=HSPB1 PE=1 SV=1;tr|A0A6Q8PF43|A0A6Q8PF43_HUMAN Heat shock protein beta-1 OS=Homo sapiens OX=9606 GN=HSPB1 PE=1 SV=1;tr|A0A6Q8PHJ6|A0A6Q8PHJ6_HUMAN Heat shock protein beta-1	0	657	0	3380700	888	0.00147875	244640	526	0.0018811	9	1	1	8.2	13.827	122	0	11.808	3625300	2			156
Q92598;A0A0A0MSM0;Q5TBM3;R4GN69	Heat shock protein 105 kDa	HSPH1	sp|Q92598|HS105_HUMAN Heat shock protein 105 kDa OS=Homo sapiens OX=9606 GN=HSPH1 PE=1 SV=1;tr|A0A0A0MSM0|A0A0A0MSM0_HUMAN Heat shock protein 105 kDa OS=Homo sapiens OX=9606 GN=HSPH1 PE=1 SV=1	199550	447	0.00214292	3357200	889	0.00146847	0	627	0	4	3	2	4.4	96.864	858	0	12.008	3556700	2			1079
O43823	A-kinase anchor protein 8	AKAP8	sp|O43823|AKAP8_HUMAN A-kinase anchor protein 8 OS=Homo sapiens OX=9606 GN=AKAP8 PE=1 SV=1	0	657	0	3346900	890	0.00146397	0	627	0	1	1	1	1.4	76.107	692	1	-2	3346900	0	+		519
Q9ULR0;D6RC18;A8MVI5	Pre-mRNA-splicing factor ISY1 homolog	ISY1	sp|Q9ULR0|ISY1_HUMAN Pre-mRNA-splicing factor ISY1 homolog OS=Homo sapiens OX=9606 GN=ISY1 PE=1 SV=3;tr|D6RC18|D6RC18_HUMAN Pre-mRNA-splicing factor ISY1 homolog OS=Homo sapiens OX=9606 GN=ISY1 PE=1 SV=1;tr|A8MVI5|A8MVI5_HUMAN Pre-mRNA-splicing factor ISY1	0	657	0	3340900	891	0.00146134	196360	548	0.00150986	3	2	2	11.2	32.992	285	0	11.781	3537300	2			1212
Q8TDB4	Protein MGARP	MGARP	sp|Q8TDB4|HUMMR_HUMAN Protein MGARP OS=Homo sapiens OX=9606 GN=MGARP PE=1 SV=1	0	657	0	3338700	892	0.00146038	0	627	0	1	1	1	13.3	25.389	240	0.0028599	8.1268	3338700	2			1071
M0QZS6;Q9UBE0;A0A590UKA0;M0QX65;A0A590UK93;A0A590UKC5;B3KNJ4;M0R286;M0QYM8;M0R054	SUMO-activating enzyme subunit 1;SUMO-activating enzyme subunit 1, N-terminally processed	SAE1	tr|M0QZS6|M0QZS6_HUMAN SUMO-activating enzyme subunit 1 OS=Homo sapiens OX=9606 GN=SAE1 PE=1 SV=1;sp|Q9UBE0|SAE1_HUMAN SUMO-activating enzyme subunit 1 OS=Homo sapiens OX=9606 GN=SAE1 PE=1 SV=1;tr|A0A590UKA0|A0A590UKA0_HUMAN SUMO-activating enzyme subunit	551160	315	0.00591878	3330900	893	0.00145697	73059	614	0.000561769	10	5	5	23.4	29.422	265	0	28.646	3955100	7			470
Q9Y5Q9;H7BZV8;H7C0C0;A0A494C1S7	General transcription factor 3C polypeptide 3	GTF3C3	sp|Q9Y5Q9|TF3C3_HUMAN General transcription factor 3C polypeptide 3 OS=Homo sapiens OX=9606 GN=GTF3C3 PE=1 SV=1	0	657	0	3329600	894	0.0014564	0	627	0	4	3	3	3.7	101.27	886	0	35.831	3329600	3			1243
Q969Z0;H7C4R5;C9J7P5;C9IZN7	Protein TBRG4	TBRG4	sp|Q969Z0|FAKD4_HUMAN FAST kinase domain-containing protein 4 OS=Homo sapiens OX=9606 GN=TBRG4 PE=1 SV=1;tr|H7C4R5|H7C4R5_HUMAN FAST kinase domain-containing protein 4 (Fragment) OS=Homo sapiens OX=9606 GN=TBRG4 PE=1 SV=1	0	657	0	3327400	895	0.00145544	0	627	0	4	3	3	7.4	70.737	631	0	18.99	3327400	4			1092
Q7Z2T5;X6RK96	TRMT1-like protein	TRMT1L	sp|Q7Z2T5|TRM1L_HUMAN TRMT1-like protein OS=Homo sapiens OX=9606 GN=TRMT1L PE=1 SV=2;tr|X6RK96|X6RK96_HUMAN TRMT1-like protein (Fragment) OS=Homo sapiens OX=9606 GN=TRMT1L PE=1 SV=1	0	657	0	3308800	896	0.0014473	0	627	0	2	2	2	5.7	81.746	733	0.0010215	11.552	3308800	1			1041
Q9BV86	N-terminal Xaa-Pro-Lys N-methyltransferase 1;N-terminal Xaa-Pro-Lys N-methyltransferase 1, N-terminally processed	NTMT1	sp|Q9BV86|NTM1A_HUMAN N-terminal Xaa-Pro-Lys N-methyltransferase 1 OS=Homo sapiens OX=9606 GN=NTMT1 PE=1 SV=3	0	657	0	3265800	897	0.00142849	0	627	0	1	2	2	9.9	25.387	223	0	27.46	3265800	2			1135
Q9UFC0;H7C5S6	Leucine-rich repeat and WD repeat-containing protein 1	LRWD1	sp|Q9UFC0|LRWD1_HUMAN Leucine-rich repeat and WD repeat-containing protein 1 OS=Homo sapiens OX=9606 GN=LRWD1 PE=1 SV=2;tr|H7C5S6|H7C5S6_HUMAN Leucine-rich repeat and WD repeat-containing protein 1 (Fragment) OS=Homo sapiens OX=9606 GN=LRWD1 PE=1 SV=1	0	657	0	3243100	898	0.00141856	0	627	0	2	2	2	4	70.86	647	0	12.156	3243100	3			1200
Q92572	AP-3 complex subunit sigma-1	AP3S1	sp|Q92572|AP3S1_HUMAN AP-3 complex subunit sigma-1 OS=Homo sapiens OX=9606 GN=AP3S1 PE=1 SV=1	0	657	0	3189100	899	0.00139494	0	627	0	1	1	1	4.7	21.732	193	0.0052678	6.5465	3189100	2			1078
P52732	Kinesin-like protein KIF11	KIF11	sp|P52732|KIF11_HUMAN Kinesin-like protein KIF11 OS=Homo sapiens OX=9606 GN=KIF11 PE=1 SV=2	607110	296	0.00651962	3157600	900	0.00138117	189320	554	0.00145573	1	7	7	9.7	119.16	1056	0	122.46	3954100	10			809
H3BV85;H3BTW0;A0A0B4J295;A0A087WZT3;H3BVE0;Q9H3K6	BolA-like protein 2	BOLA2B;BOLA2	tr|H3BV85|H3BV85_HUMAN BolA-like protein 2 OS=Homo sapiens OX=9606 GN=BOLA2B PE=1 SV=2;tr|H3BTW0|H3BTW0_HUMAN BOLA2-SMG1P6 readthrough (Fragment) OS=Homo sapiens OX=9606 GN=BOLA2-SMG1P6 PE=3 SV=1;tr|A0A0B4J295|A0A0B4J295_HUMAN BOLA2-SMG1P6 readthrough OS=H	0	657	0	3153700	901	0.00137946	0	627	0	6	1	1	29.6	6.3612	54	0	34.125	3153700	1			36
Q99459	Cell division cycle 5-like protein	CDC5L	sp|Q99459|CDC5L_HUMAN Cell division cycle 5-like protein OS=Homo sapiens OX=9606 GN=CDC5L PE=1 SV=2	0	657	0	3152400	902	0.00137889	0	627	0	1	1	1	1.2	92.25	802	0.0053286	6.6536	3152400	1			1117
Q6T5J5;J3KNI5;Q8N7C3	Probable E3 ubiquitin-protein ligase TRIML2	FLJ25801;TRIML2	tr|Q6T5J5|Q6T5J5_HUMAN Probable E3 ubiquitin-protein ligase TRIML2 (Fragment) OS=Homo sapiens OX=9606 GN=TRIML2 PE=1 SV=1;tr|J3KNI5|J3KNI5_HUMAN Probable E3 ubiquitin-protein ligase TRIML2 (Fragment) OS=Homo sapiens OX=9606 GN=TRIML2 PE=1 SV=1;sp|Q8N7C3|TR	0	657	0	3140500	903	0.00137369	0	627	0	3	1	1	8.5	13.816	118	1	-2	3140500	0	+		408
A0A0A0MTP7;F8VXG7;Q99590	Protein SCAF11	SCAF11	tr|A0A0A0MTP7|A0A0A0MTP7_HUMAN Protein SCAF11 OS=Homo sapiens OX=9606 GN=SCAF11 PE=1 SV=1;tr|F8VXG7|F8VXG7_HUMAN Protein SCAF11 OS=Homo sapiens OX=9606 GN=SCAF11 PE=1 SV=1;sp|Q99590|SCAFB_HUMAN Protein SCAF11 OS=Homo sapiens OX=9606 GN=SCAF11 PE=1 SV=2	0	657	0	3101900	904	0.0013568	0	627	0	3	1	1	2.7	106.01	935	0.0060137	6.3931	3101900	1			60
Q92688	Acidic leucine-rich nuclear phosphoprotein 32 family member B	ANP32B	sp|Q92688|AN32B_HUMAN Acidic leucine-rich nuclear phosphoprotein 32 family member B OS=Homo sapiens OX=9606 GN=ANP32B PE=1 SV=1	0	657	0	3101300	905	0.00135654	0	627	0	1	1	1	4.4	28.787	251	0.0044803	6.7028	3101300	2			1082
A0A3B3ITT5;P47914	60S ribosomal protein L29	RPL29	tr|A0A3B3ITT5|A0A3B3ITT5_HUMAN 60S ribosomal protein L29 OS=Homo sapiens OX=9606 GN=RPL29 PE=1 SV=1;sp|P47914|RL29_HUMAN 60S ribosomal protein L29 OS=Homo sapiens OX=9606 GN=RPL29 PE=1 SV=2	0	657	0	3098100	906	0.00135514	0	627	0	2	1	1	9	18.512	167	0.0027574	7.0979	3098100	1			128
Q9BXK5;F2Z2C3;A0A087WW80;A0A0A0MR90;E9PDD6;A0A087WTL4;A0A087WX97;F6VJB4	Bcl-2-like protein 13	BCL2L13	sp|Q9BXK5|B2L13_HUMAN Bcl-2-like protein 13 OS=Homo sapiens OX=9606 GN=BCL2L13 PE=1 SV=1;tr|F2Z2C3|F2Z2C3_HUMAN Bcl-2-like protein 13 OS=Homo sapiens OX=9606 GN=BCL2L13 PE=1 SV=1;tr|A0A087WW80|A0A087WW80_HUMAN Bcl-2-like protein 13 OS=Homo sapiens OX=9606	212660	437	0.00228371	3072900	907	0.00134412	698450	356	0.00537056	8	4	4	16.5	52.723	485	0	28.838	3984000	9			1140
K7ENG2;P26368	Splicing factor U2AF 65 kDa subunit	U2AF2	tr|K7ENG2|K7ENG2_HUMAN U2 snRNP auxiliary factor large subunit OS=Homo sapiens OX=9606 GN=U2AF2 PE=1 SV=1;sp|P26368|U2AF2_HUMAN Splicing factor U2AF 65 kDa subunit OS=Homo sapiens OX=9606 GN=U2AF2 PE=1 SV=4	0	657	0	3063200	908	0.00133987	0	627	0	2	2	2	7.8	33.901	307	0	11.723	3063200	2			434
B7Z9I1;Q5T4U5;P11310;H0YDT5	Medium-chain specific acyl-CoA dehydrogenase, mitochondrial	ACADM	tr|B7Z9I1|B7Z9I1_HUMAN Medium-chain specific acyl-CoA dehydrogenase, mitochondrial OS=Homo sapiens OX=9606 GN=ACADM PE=1 SV=1;tr|Q5T4U5|Q5T4U5_HUMAN Medium-chain specific acyl-CoA dehydrogenase, mitochondrial OS=Homo sapiens OX=9606 GN=ACADM PE=1 SV=1;sp|P	194770	455	0.00209159	3042500	909	0.00133082	116370	601	0.000894799	4	4	4	17.7	42.426	385	0	73.17	3353700	8			206
Q6GMV2	SET and MYND domain-containing protein 5	SMYD5	sp|Q6GMV2|SMYD5_HUMAN SET and MYND domain-containing protein 5 OS=Homo sapiens OX=9606 GN=SMYD5 PE=1 SV=2	0	657	0	3022700	910	0.00132216	0	627	0	1	1	1	2.9	47.34	418	0	12.888	3022700	1			1021
H3BLV9;Q96SB4	SRSF protein kinase 1	SRPK1	tr|H3BLV9|H3BLV9_HUMAN SRSF protein kinase 1 (Fragment) OS=Homo sapiens OX=9606 GN=SRPK1 PE=1 SV=1;sp|Q96SB4|SRPK1_HUMAN SRSF protein kinase 1 OS=Homo sapiens OX=9606 GN=SRPK1 PE=1 SV=2	0	657	0	3017900	911	0.00132006	0	627	0	2	2	2	3.1	76.039	671	0	13.228	3017900	4			384
F8WAH1;Q9UDR5;F8WE53	Alpha-aminoadipic semialdehyde synthase, mitochondrial;Lysine ketoglutarate reductase;Saccharopine dehydrogenase	AASS	tr|F8WAH1|F8WAH1_HUMAN Lysine ketoglutarate reductase OS=Homo sapiens OX=9606 GN=AASS PE=1 SV=1;sp|Q9UDR5|AASS_HUMAN Alpha-aminoadipic semialdehyde synthase, mitochondrial OS=Homo sapiens OX=9606 GN=AASS PE=1 SV=1	0	657	0	3016500	912	0.00131945	0	627	0	3	3	3	6.4	81.037	732	0	21.744	3016500	4			344
Q9UBW8;F5H7C6;F5GYF7;F5H248;F5H4U8;F5H4Z0;F5H3M6;G3XAP1;F5GXT7	COP9 signalosome complex subunit 7a	COPS7A	sp|Q9UBW8|CSN7A_HUMAN COP9 signalosome complex subunit 7a OS=Homo sapiens OX=9606 GN=COPS7A PE=1 SV=1;tr|F5H7C6|F5H7C6_HUMAN COP9 signalosome complex subunit 7a (Fragment) OS=Homo sapiens OX=9606 GN=COPS7A PE=1 SV=1;tr|F5GYF7|F5GYF7_HUMAN COP9 signalosome	84458	585	0.000906975	3011700	913	0.00131735	0	627	0	9	4	4	23.3	30.276	275	0	45.636	3096100	6			1198
H0YIW2;Q9UJX3	Anaphase-promoting complex subunit 7	ANAPC7	tr|H0YIW2|H0YIW2_HUMAN Anaphase-promoting complex subunit 7 (Fragment) OS=Homo sapiens OX=9606 GN=ANAPC7 PE=1 SV=1;sp|Q9UJX3|APC7_HUMAN Anaphase-promoting complex subunit 7 OS=Homo sapiens OX=9606 GN=ANAPC7 PE=1 SV=4	0	657	0	2972000	914	0.00129998	0	627	0	2	2	2	12.1	16.674	149	0	12.554	2972000	2			374
Q02878;F8VR69;F8VZ45;U3KQR5	60S ribosomal protein L6	RPL6	sp|Q02878|RL6_HUMAN 60S ribosomal protein L6 OS=Homo sapiens OX=9606 GN=RPL6 PE=1 SV=3	332220	372	0.00356764	2953000	915	0.00129167	212550	539	0.00163435	4	4	4	23.6	32.728	288	0	47.802	3497800	7			904
A0A0A0MRI2;Q9UNH7	Sorting nexin-6;Sorting nexin-6, N-terminally processed	SNX6	tr|A0A0A0MRI2|A0A0A0MRI2_HUMAN Sorting nexin OS=Homo sapiens OX=9606 GN=SNX6 PE=1 SV=1;sp|Q9UNH7|SNX6_HUMAN Sorting nexin-6 OS=Homo sapiens OX=9606 GN=SNX6 PE=1 SV=1	0	657	0	2945900	916	0.00128857	0	627	0	2	1	1	2.6	47.804	418	0.0028249	7.7027	2945900	2			54
O60547	GDP-mannose 4,6 dehydratase	GMDS	sp|O60547|GMDS_HUMAN GDP-mannose 4,6 dehydratase OS=Homo sapiens OX=9606 GN=GMDS PE=1 SV=1	0	657	0	2924200	917	0.00127907	226100	534	0.00173854	1	2	2	5.4	41.949	372	0	13.229	3150300	2			532
Q15370;A0A0B4J296;B8ZZU8	Transcription elongation factor B polypeptide 2	TCEB2	sp|Q15370|ELOB_HUMAN Elongin-B OS=Homo sapiens OX=9606 GN=ELOB PE=1 SV=1;tr|A0A0B4J296|A0A0B4J296_HUMAN Elongin-B OS=Homo sapiens OX=9606 GN=ELOB PE=1 SV=1;tr|B8ZZU8|B8ZZU8_HUMAN Elongin-B OS=Homo sapiens OX=9606 GN=ELOB PE=1 SV=1	0	657	0	2914600	918	0.00127488	0	627	0	3	2	2	16.9	13.133	118	0.002006	11.206	2914600	2			976
K7EQ02;K7EQ55;K7EK33;Q96EP5	DAZ-associated protein 1	DAZAP1	tr|K7EQ02|K7EQ02_HUMAN DAZ-associated protein 1 (Fragment) OS=Homo sapiens OX=9606 GN=DAZAP1 PE=1 SV=2;tr|K7EQ55|K7EQ55_HUMAN DAZ-associated protein 1 OS=Homo sapiens OX=9606 GN=DAZAP1 PE=1 SV=2;tr|K7EK33|K7EK33_HUMAN DAZ-associated protein 1 OS=Homo sapie	0	657	0	2895000	919	0.0012663	0	627	0	4	1	1	4.9	35.02	327	0	21.185	2895000	3			429
A0A590UJC4;A0A590UK34;A0A590UJR3;A0A590UJ21;A0A0C4DGX4;A0A590UJ50;Q13616	Cullin-1	CUL1	tr|A0A590UJC4|A0A590UJC4_HUMAN Cullin-1 OS=Homo sapiens OX=9606 GN=CUL1 PE=1 SV=1;tr|A0A590UK34|A0A590UK34_HUMAN Cullin-1 OS=Homo sapiens OX=9606 GN=CUL1 PE=1 SV=1;tr|A0A590UJR3|A0A590UJR3_HUMAN Cullin-1 OS=Homo sapiens OX=9606 GN=CUL1 PE=1 SV=1;tr|A0A590U	0	657	0	2867600	920	0.00125432	0	627	0	7	1	1	1.3	78.373	678	0.0027624	7.1476	2867600	1			73
X6RJ95;Q9H7Z7;A6NHH0	Prostaglandin E synthase 2;Prostaglandin E synthase 2 truncated form	PTGES2	tr|X6RJ95|X6RJ95_HUMAN Prostaglandin E synthase 2 (Fragment) OS=Homo sapiens OX=9606 GN=PTGES2 PE=1 SV=1;sp|Q9H7Z7|PGES2_HUMAN Prostaglandin E synthase 2 OS=Homo sapiens OX=9606 GN=PTGES2 PE=1 SV=1;tr|A6NHH0|A6NHH0_HUMAN Prostaglandin E synthase 2 OS=Homo	0	657	0	2867100	921	0.0012541	0	627	0	3	2	2	15.5	29.13	265	0	14.734	2867100	2			1156
A0A494C0G7;Q9UNQ2;D6RCL3;A0A0C4DGB1	Probable dimethyladenosine transferase	DIMT1	tr|A0A494C0G7|A0A494C0G7_HUMAN rRNA adenine N(6)-methyltransferase OS=Homo sapiens OX=9606 GN=DIMT1 PE=1 SV=1;sp|Q9UNQ2|DIM1_HUMAN Probable dimethyladenosine transferase OS=Homo sapiens OX=9606 GN=DIMT1 PE=1 SV=1;tr|D6RCL3|D6RCL3_HUMAN rRNA adenine N(6)-me	46060	643	0.000494628	2849800	922	0.00124653	0	627	0	4	2	2	6.3	35.692	317	0	11.862	2895900	2			136
Q15427	Splicing factor 3B subunit 4	SF3B4	sp|Q15427|SF3B4_HUMAN Splicing factor 3B subunit 4 OS=Homo sapiens OX=9606 GN=SF3B4 PE=1 SV=1	0	657	0	2821700	923	0.00123424	0	627	0	1	1	1	5.4	44.385	424	0.0028409	7.8314	2821700	2			979
F8W717;A0A3B3IU69;O00423	Echinoderm microtubule-associated protein-like 1	EML1	tr|F8W717|F8W717_HUMAN Echinoderm microtubule-associated protein-like 1 OS=Homo sapiens OX=9606 GN=EML1 PE=1 SV=1;tr|A0A3B3IU69|A0A3B3IU69_HUMAN Echinoderm microtubule-associated protein-like 1 OS=Homo sapiens OX=9606 GN=EML1 PE=1 SV=1;sp|O00423|EMAL1_HUMA	0	657	0	2800400	924	0.00122492	0	627	0	3	1	1	3.2	88.716	803	0.0084246	6.2917	2800400	1			130
A0A1B0GV93;Q53GQ0;E9PI21;A0A1B0GVY6	Very-long-chain 3-oxoacyl-CoA reductase	HSD17B12	tr|A0A1B0GV93|A0A1B0GV93_HUMAN Very-long-chain 3-oxoacyl-CoA reductase OS=Homo sapiens OX=9606 GN=HSD17B12 PE=1 SV=1;sp|Q53GQ0|DHB12_HUMAN Very-long-chain 3-oxoacyl-CoA reductase OS=Homo sapiens OX=9606 GN=HSD17B12 PE=1 SV=2;tr|E9PI21|E9PI21_HUMAN Very-lon	0	657	0	2799800	925	0.00122466	151780	576	0.00116708	4	2	2	9.8	30.361	276	0	11.708	2951600	2			89
O14654	Insulin receptor substrate 4	IRS4	sp|O14654|IRS4_HUMAN Insulin receptor substrate 4 OS=Homo sapiens OX=9606 GN=IRS4 PE=1 SV=1	52829	636	0.000567319	2791600	926	0.00122107	0	627	0	1	3	3	3.3	133.77	1257	0	17.884	2844500	3			493
Q8TAT6;A0A0D9SFI9;I3L4U9;I3L3I1	Nuclear protein localization protein 4 homolog	NPLOC4	sp|Q8TAT6|NPL4_HUMAN Nuclear protein localization protein 4 homolog OS=Homo sapiens OX=9606 GN=NPLOC4 PE=1 SV=3;tr|A0A0D9SFI9|A0A0D9SFI9_HUMAN Nuclear protein localization protein 4 homolog OS=Homo sapiens OX=9606 GN=NPLOC4 PE=1 SV=1;tr|I3L4U9|I3L4U9_HUMAN	0	657	0	2783400	927	0.00121749	0	627	0	4	2	2	5.8	68.119	608	0	34.15	2783400	5			1068
Q12874	Splicing factor 3A subunit 3	SF3A3	sp|Q12874|SF3A3_HUMAN Splicing factor 3A subunit 3 OS=Homo sapiens OX=9606 GN=SF3A3 PE=1 SV=1	0	657	0	2767500	928	0.00121053	0	627	0	1	3	3	8.6	58.848	501	0	18.685	2767500	4			924
P20290	Transcription factor BTF3	BTF3	sp|P20290|BTF3_HUMAN Transcription factor BTF3 OS=Homo sapiens OX=9606 GN=BTF3 PE=1 SV=1	0	657	0	2766000	929	0.00120988	0	627	0	1	1	1	13.6	22.168	206	0.0028517	8.0647	2766000	3			664
Q15056	Eukaryotic translation initiation factor 4H	EIF4H	sp|Q15056|IF4H_HUMAN Eukaryotic translation initiation factor 4H OS=Homo sapiens OX=9606 GN=EIF4H PE=1 SV=5	0	657	0	2752200	930	0.00120384	0	627	0	1	1	1	11.7	27.385	248	0.0060189	6.4083	2752200	2			969
D6REL4;E7EQZ7;Q13123	Protein Red	IK	tr|D6REL4|D6REL4_HUMAN Protein Red (Fragment) OS=Homo sapiens OX=9606 GN=IK PE=1 SV=6;tr|E7EQZ7|E7EQZ7_HUMAN Protein Red (Fragment) OS=Homo sapiens OX=9606 GN=IK PE=1 SV=1;sp|Q13123|RED_HUMAN Protein Red OS=Homo sapiens OX=9606 GN=IK PE=1 SV=3	0	657	0	2739000	931	0.00119807	0	627	0	3	1	1	4.2	24.7	212	0.0053476	6.6705	2739000	1			254
Q92797;A0A087WUE9;M0R033;M0R3C7	Symplekin	SYMPK	sp|Q92797|SYMPK_HUMAN Symplekin OS=Homo sapiens OX=9606 GN=SYMPK PE=1 SV=2;tr|A0A087WUE9|A0A087WUE9_HUMAN Symplekin OS=Homo sapiens OX=9606 GN=SYMPK PE=1 SV=1	58481	628	0.000628014	2717500	932	0.00118866	133480	587	0.00102636	4	3	3	2.4	141.15	1274	0	19.421	2909500	7			1084
E5RJR3;Q9NZL9	Methionine adenosyltransferase 2 subunit beta	MAT2B	tr|E5RJR3|E5RJR3_HUMAN Methionine adenosyltransferase 2 subunit beta OS=Homo sapiens OX=9606 GN=MAT2B PE=1 SV=1;sp|Q9NZL9|MAT2B_HUMAN Methionine adenosyltransferase 2 subunit beta OS=Homo sapiens OX=9606 GN=MAT2B PE=1 SV=1	0	657	0	2703800	933	0.00118267	0	627	0	2	1	1	10.3	13.541	117	0.0053097	6.6412	2703800	1			265
Q96AG4	Leucine-rich repeat-containing protein 59	LRRC59	sp|Q96AG4|LRC59_HUMAN Leucine-rich repeat-containing protein 59 OS=Homo sapiens OX=9606 GN=LRRC59 PE=1 SV=1	79206	597	0.000850575	2699000	934	0.00118057	0	627	0	1	2	2	8.8	34.93	307	0.0029703	10.923	2778300	2			1096
Q8NEV4	Myosin-IIIa	MYO3A	sp|Q8NEV4|MYO3A_HUMAN Myosin-IIIa OS=Homo sapiens OX=9606 GN=MYO3A PE=1 SV=2	0	657	0	2692300	935	0.00117764	0	627	0	1	1	1	0.6	186.21	1616	0.0052724	6.5483	2692300	2			1065
Q2NL82	Pre-rRNA-processing protein TSR1 homolog	TSR1	sp|Q2NL82|TSR1_HUMAN Pre-rRNA-processing protein TSR1 homolog OS=Homo sapiens OX=9606 GN=TSR1 PE=1 SV=1	0	657	0	2658000	936	0.00116264	0	627	0	1	2	2	3	91.809	804	0	56.413	2658000	4			994
A0A0B4J269;Q13509;G3V2A3	Tubulin beta-3 chain	TUBB3	tr|A0A0B4J269|A0A0B4J269_HUMAN G_PROTEIN_RECEP_F1_2 domain-containing protein OS=Homo sapiens OX=9606 PE=1 SV=1;sp|Q13509|TBB3_HUMAN Tubulin beta-3 chain OS=Homo sapiens OX=9606 GN=TUBB3 PE=1 SV=2	0	657	0	2622000	937	0.00114689	0	627	0	3	18	1	21.2	88.381	797	0.0044723	6.6948	2622000	2			63
P28482	Mitogen-activated protein kinase 1	MAPK1	sp|P28482|MK01_HUMAN Mitogen-activated protein kinase 1 OS=Homo sapiens OX=9606 GN=MAPK1 PE=1 SV=3	0	657	0	2618700	938	0.00114545	0	627	0	1	1	1	5.3	41.389	360	0.0084602	6.3031	2618700	1			707
P62136;E9PMD7	Serine/threonine-protein phosphatase PP1-alpha catalytic subunit;Serine/threonine-protein phosphatase	PPP1CA	sp|P62136|PP1A_HUMAN Serine/threonine-protein phosphatase PP1-alpha catalytic subunit OS=Homo sapiens OX=9606 GN=PPP1CA PE=1 SV=1;tr|E9PMD7|E9PMD7_HUMAN Serine/threonine-protein phosphatase (Fragment) OS=Homo sapiens OX=9606 GN=PPP1CA PE=1 SV=1	0	657	0	2615800	939	0.00114418	0	627	0	2	6	1	34.5	37.512	330	0.0027397	6.9428	2615800	2			849
D6RBD7;C9J1V9;O43324;D6RCQ0;H0YAL7	Eukaryotic translation elongation factor 1 epsilon-1	EEF1E1;EEF1E1-BLOC1S5	tr|D6RBD7|D6RBD7_HUMAN Eukaryotic translation elongation factor 1 epsilon-1 OS=Homo sapiens OX=9606 GN=EEF1E1 PE=1 SV=1;tr|C9J1V9|C9J1V9_HUMAN EEF1E1-BLOC1S5 readthrough (NMD candidate) OS=Homo sapiens OX=9606 GN=EEF1E1-BLOC1S5 PE=4 SV=2;sp|O43324|MCA3_HUM	327710	378	0.0035192	2615100	940	0.00114387	467330	405	0.00359342	5	2	2	14	16.686	150	0	25.451	3410100	6			214
H3BP78;F8W7R3;A0A6Q8PGF4;A0A6Q8PH09;Q9NVI1	Fanconi anemia group I protein	FANCI	tr|H3BP78|H3BP78_HUMAN Fanconi anemia group I protein (Fragment) OS=Homo sapiens OX=9606 GN=FANCI PE=1 SV=1;tr|F8W7R3|F8W7R3_HUMAN Fanconi anemia group I protein OS=Homo sapiens OX=9606 GN=FANCI PE=1 SV=1;tr|A0A6Q8PGF4|A0A6Q8PGF4_HUMAN Fanconi anemia group	0	657	0	2599700	941	0.00113713	0	627	0	5	1	1	1	122.83	1090	0.0045579	6.87	2599700	1			161
Q5T1M5	FK506-binding protein 15	FKBP15	sp|Q5T1M5|FKB15_HUMAN FK506-binding protein 15 OS=Homo sapiens OX=9606 GN=FKBP15 PE=1 SV=2	62827	622	0.000674685	2595300	942	0.00113521	0	627	0	1	2	2	2.3	133.63	1219	0.0029674	10.917	2658100	2			1009
Q9NRF9	DNA polymerase epsilon subunit 3	POLE3	sp|Q9NRF9|DPOE3_HUMAN DNA polymerase epsilon subunit 3 OS=Homo sapiens OX=9606 GN=POLE3 PE=1 SV=1	91518	576	0.000982791	2590100	943	0.00113294	308920	480	0.00237537	1	1	1	10.9	16.859	147	0	20.076	2990600	4			1169
H0YFV4;O60706	ATP-binding cassette sub-family C member 9	ABCC9	tr|H0YFV4|H0YFV4_HUMAN ATP-binding cassette sub-family C member 9 (Fragment) OS=Homo sapiens OX=9606 GN=ABCC9 PE=1 SV=1;sp|O60706|ABCC9_HUMAN ATP-binding cassette sub-family C member 9 OS=Homo sapiens OX=9606 GN=ABCC9 PE=1 SV=2	0	657	0	2586100	944	0.00113119	0	627	0	2	1	1	2	131.58	1176	1	-2	2586100	1	+		371
A0A2R8Y6X0;A0A669KBJ7;Q9H2P0	Activity-dependent neuroprotector homeobox protein	ADNP	tr|A0A2R8Y6X0|A0A2R8Y6X0_HUMAN Activity-dependent neuroprotector homeobox protein OS=Homo sapiens OX=9606 GN=ADNP PE=1 SV=1;tr|A0A669KBJ7|A0A669KBJ7_HUMAN Activity-dependent neuroprotector homeobox protein OS=Homo sapiens OX=9606 GN=ADNP PE=1 SV=1;sp|Q9H2P	0	657	0	2585500	945	0.00113092	0	627	0	3	1	1	2.3	97.225	874	0.0027752	7.2404	2585500	1			111
H0YB37;Q99614	Tetratricopeptide repeat protein 1	TTC1	tr|H0YB37|H0YB37_HUMAN Tetratricopeptide repeat protein 1 (Fragment) OS=Homo sapiens OX=9606 GN=TTC1 PE=1 SV=1;sp|Q99614|TTC1_HUMAN Tetratricopeptide repeat protein 1 OS=Homo sapiens OX=9606 GN=TTC1 PE=1 SV=1	153480	498	0.00164819	2583500	946	0.00113005	205310	542	0.00157868	2	1	1	6.1	18.901	163	0.0052632	6.546	2942300	3			366
M0R0F9;W4VSQ9;Q15642	Cdc42-interacting protein 4	TRIP10	tr|M0R0F9|M0R0F9_HUMAN Cdc42-interacting protein 4 OS=Homo sapiens OX=9606 GN=TRIP10 PE=1 SV=1;tr|W4VSQ9|W4VSQ9_HUMAN Cdc42-interacting protein 4 OS=Homo sapiens OX=9606 GN=TRIP10 PE=1 SV=1;sp|Q15642|CIP4_HUMAN Cdc42-interacting protein 4 OS=Homo sapiens O	0	657	0	2576900	947	0.00112716	0	627	0	3	1	1	5.7	49.712	437	0.0028169	7.6065	2576900	1			472
O60216;E5RJW1;E5RJK5;E5RFV8;E5RIN7;A0A140T8W2;Q9H4I0	Double-strand-break repair protein rad21 homolog	RAD21	sp|O60216|RAD21_HUMAN Double-strand-break repair protein rad21 homolog OS=Homo sapiens OX=9606 GN=RAD21 PE=1 SV=2;tr|E5RJW1|E5RJW1_HUMAN Double-strand-break repair protein rad21 homolog (Fragment) OS=Homo sapiens OX=9606 GN=RAD21 PE=1 SV=1;tr|E5RJK5|E5RJK5	185600	461	0.00199312	2569300	948	0.00112384	391330	431	0.00300904	7	4	4	7.4	71.689	631	0	29.549	3146300	4			523
M0QXN5;P37198	Nuclear pore glycoprotein p62	NUP62	tr|M0QXN5|M0QXN5_HUMAN Nuclear pore glycoprotein p62 OS=Homo sapiens OX=9606 GN=NUP62 PE=1 SV=1;sp|P37198|NUP62_HUMAN Nuclear pore glycoprotein p62 OS=Homo sapiens OX=9606 GN=NUP62 PE=1 SV=3	29281	651	0.000314442	2557600	949	0.00111872	0	627	0	2	3	3	11	45.615	446	0	16.364	2586900	2			466
A0A0A0MRR7;P09234	U1 small nuclear ribonucleoprotein C	SNRPC	tr|A0A0A0MRR7|A0A0A0MRR7_HUMAN U1 small nuclear ribonucleoprotein C OS=Homo sapiens OX=9606 GN=SNRPC PE=1 SV=1;sp|P09234|RU1C_HUMAN U1 small nuclear ribonucleoprotein C OS=Homo sapiens OX=9606 GN=SNRPC PE=1 SV=1	0	657	0	2548700	950	0.00111483	0	627	0	2	1	1	10	19.687	180	0.0060923	6.4719	2548700	1			55
A6NKE1;O43617;A0A087WWM0	Trafficking protein particle complex subunit 3	TRAPPC3	tr|A6NKE1|A6NKE1_HUMAN Trafficking protein particle complex subunit 3 OS=Homo sapiens OX=9606 GN=TRAPPC3 PE=1 SV=1;sp|O43617|TPPC3_HUMAN Trafficking protein particle complex subunit 3 OS=Homo sapiens OX=9606 GN=TRAPPC3 PE=1 SV=1;tr|A0A087WWM0|A0A087WWM0_HU	220360	434	0.0023664	2548600	951	0.00111478	0	627	0	3	2	2	13.6	13.343	118	0	12.151	2769000	3			172
Q9UDY4	DnaJ homolog subfamily B member 4	DNAJB4	sp|Q9UDY4|DNJB4_HUMAN DnaJ homolog subfamily B member 4 OS=Homo sapiens OX=9606 GN=DNAJB4 PE=1 SV=1	0	657	0	2535000	952	0.00110883	0	627	0	1	2	1	8.3	37.806	337	0.0028681	8.303	2535000	1			1199
Q9HAU5	Regulator of nonsense transcripts 2	UPF2	sp|Q9HAU5|RENT2_HUMAN Regulator of nonsense transcripts 2 OS=Homo sapiens OX=9606 GN=UPF2 PE=1 SV=1	0	657	0	2531200	953	0.00110717	0	627	0	1	2	2	2	147.81	1272	0	12.305	2531200	2			1159
O00429;B4DPZ9;F8W1W3;F8VUJ9;F8VZ52	Dynamin-1-like protein	DNM1L	sp|O00429|DNM1L_HUMAN Dynamin-1-like protein OS=Homo sapiens OX=9606 GN=DNM1L PE=1 SV=2;tr|B4DPZ9|B4DPZ9_HUMAN Dynamin-1-like protein OS=Homo sapiens OX=9606 GN=DNM1L PE=1 SV=1;tr|F8W1W3|F8W1W3_HUMAN Dynamin-1-like protein (Fragment) OS=Homo sapiens OX=960	0	657	0	2517200	954	0.00110105	0	627	0	5	2	2	3.8	81.876	736	0	12.966	2517200	2			486
P13995;B9A062;B8ZZU9	Bifunctional methylenetetrahydrofolate dehydrogenase/cyclohydrolase, mitochondrial;NAD-dependent methylenetetrahydrofolate dehydrogenase;Methenyltetrahydrofolate cyclohydrolase	MTHFD2	sp|P13995|MTDC_HUMAN Bifunctional methylenetetrahydrofolate dehydrogenase/cyclohydrolase, mitochondrial OS=Homo sapiens OX=9606 GN=MTHFD2 PE=1 SV=2;tr|B9A062|B9A062_HUMAN Bifunctional methylenetetrahydrofolate dehydrogenase/cyclohydrolase, mitochondrial OS	0	657	0	2511200	955	0.00109842	0	627	0	3	2	2	6.6	37.895	350	0.0010163	11.494	2511200	2			639
H0YA99;A0A2R8Y857;H0Y8Y7;A0A3B3IS06;E7ETY2;Q13428	Treacle protein	TCOF1	tr|H0YA99|H0YA99_HUMAN Treacle protein (Fragment) OS=Homo sapiens OX=9606 GN=TCOF1 PE=1 SV=1;tr|A0A2R8Y857|A0A2R8Y857_HUMAN Treacle protein (Fragment) OS=Homo sapiens OX=9606 GN=TCOF1 PE=1 SV=1;tr|H0Y8Y7|H0Y8Y7_HUMAN Treacle protein OS=Homo sapiens OX=9606	0	657	0	2507100	956	0.00109663	0	627	0	6	1	1	9.6	21.057	188	0	16.205	2507100	1			116
Q6VMQ6;F5GYR7;F5H592;A8MV73	Activating transcription factor 7-interacting protein 1	ATF7IP	sp|Q6VMQ6|MCAF1_HUMAN Activating transcription factor 7-interacting protein 1 OS=Homo sapiens OX=9606 GN=ATF7IP PE=1 SV=3;tr|F5GYR7|F5GYR7_HUMAN Activating transcription factor 7-interacting protein 1 (Fragment) OS=Homo sapiens OX=9606 GN=ATF7IP PE=1 SV=1;	0	657	0	2490300	957	0.00108928	0	627	0	4	2	2	2.1	136.39	1270	0	20.156	2490300	4			1031
P11047	Laminin subunit gamma-1	LAMC1	sp|P11047|LAMC1_HUMAN Laminin subunit gamma-1 OS=Homo sapiens OX=9606 GN=LAMC1 PE=1 SV=3	1797900	178	0.0193072	2471400	958	0.00108101	1075300	289	0.00826826	1	8	8	8	177.6	1609	0	205.26	5344600	17			618
F8VYY9;P54619;F8VVA3;A0A494C068;E9PGP6;A0A494C1K7;Q9UGJ0;F8VSH3;F8VRY2;H0YHF8;F8VSL2;F8VPF5;F8VZX1;A0A494C026;H0YIC9	5-AMP-activated protein kinase subunit gamma-1;5-AMP-activated protein kinase subunit gamma-2	PRKAG1;PRKAG2	tr|F8VYY9|F8VYY9_HUMAN 5-AMP-activated protein kinase subunit gamma-1 OS=Homo sapiens OX=9606 GN=PRKAG1 PE=1 SV=1;sp|P54619|AAKG1_HUMAN 5-AMP-activated protein kinase subunit gamma-1 OS=Homo sapiens OX=9606 GN=PRKAG1 PE=1 SV=1;tr|F8VVA3|F8VVA3_HUMAN 5-A	0	657	0	2466700	959	0.00107896	0	627	0	15	3	3	16.4	31.905	280	0	18.277	2466700	3			336
Q8NBJ5;M0QX72	Procollagen galactosyltransferase 1	COLGALT1	sp|Q8NBJ5|GT251_HUMAN Procollagen galactosyltransferase 1 OS=Homo sapiens OX=9606 GN=COLGALT1 PE=1 SV=1	0	657	0	2464300	960	0.00107791	0	627	0	2	3	3	5.6	71.635	622	0	23.872	2464300	4			1064
A0A3B3ISX1;A0A3B3IRQ9;P55265	Double-stranded RNA-specific adenosine deaminase	ADAR	tr|A0A3B3ISX1|A0A3B3ISX1_HUMAN Double-stranded RNA-specific adenosine deaminase (Fragment) OS=Homo sapiens OX=9606 GN=ADAR PE=1 SV=1;tr|A0A3B3IRQ9|A0A3B3IRQ9_HUMAN Double-stranded RNA-specific adenosine deaminase (Fragment) OS=Homo sapiens OX=9606 GN=ADAR	0	657	0	2463700	961	0.00107765	0	627	0	3	1	1	2.1	77.922	707	0.0028544	8.0881	2463700	1			125
H7C1W2;H0Y5Q7;E9PF84;G5E9Q7;E7EQB8;P51553	Isocitrate dehydrogenase [NAD] subunit, mitochondrial;Isocitrate dehydrogenase [NAD] subunit gamma, mitochondrial	IDH3G	tr|H7C1W2|H7C1W2_HUMAN Isocitrate dehydrogenase [NAD] subunit gamma, mitochondrial (Fragment) OS=Homo sapiens OX=9606 GN=IDH3G PE=1 SV=1;tr|H0Y5Q7|H0Y5Q7_HUMAN Isocitrate dehydrogenase [NAD] subunit gamma, mitochondrial (Fragment) OS=Homo sapiens OX=9606 G	0	657	0	2433900	962	0.00106461	0	627	0	6	1	1	5.5	22.384	199	0.002	11.093	2433900	2			270
A6NM32;C9JQD4;O43447	Peptidyl-prolyl cis-trans isomerase;Peptidyl-prolyl cis-trans isomerase H	PPIH	tr|A6NM32|A6NM32_HUMAN Peptidyl-prolyl cis-trans isomerase H OS=Homo sapiens OX=9606 GN=PPIH PE=1 SV=1;tr|C9JQD4|C9JQD4_HUMAN Peptidyl-prolyl cis-trans isomerase (Fragment) OS=Homo sapiens OX=9606 GN=PPIH PE=1 SV=1;sp|O43447|PPIH_HUMAN Peptidyl-prolyl cis-	0	657	0	2422600	963	0.00105967	0	627	0	3	1	1	17.5	6.3261	57	0.0060397	6.4308	2422600	0			173
Q8NGR2	Olfactory receptor 1L6	OR1L6	sp|Q8NGR2|OR1L6_HUMAN Olfactory receptor 1L6 OS=Homo sapiens OX=9606 GN=OR1L6 PE=3 SV=2	0	657	0	2421300	964	0.0010591	0	627	0	1	1	1	2.3	39.515	347	1	-2	2421300	1	+		1067
F8VR50;C9JZD1;O15145	Actin-related protein 2/3 complex subunit 3	ARPC3	tr|F8VR50|F8VR50_HUMAN Actin-related protein 2/3 complex subunit 3 (Fragment) OS=Homo sapiens OX=9606 GN=ARPC3 PE=1 SV=1;tr|C9JZD1|C9JZD1_HUMAN Actin-related protein 2/3 complex subunit 3 (Fragment) OS=Homo sapiens OX=9606 GN=ARPC3 PE=1 SV=1;sp|O15145|ARPC	0	657	0	2417200	965	0.00105731	0	627	0	3	1	1	13.1	9.7261	84	0.0029557	10.663	2417200	1			237
D6RD30		CCNG1	tr|D6RD30|D6RD30_HUMAN Cyclin-G1 OS=Homo sapiens OX=9606 GN=CCNG1 PE=4 SV=1	0	657	0	2414400	966	0.00105608	0	627	0	1	1	1	9.3	12.508	107	1	-2	2414400	1	+		253
A0A0A0MSK4;A0A0A0MRC4;Q86YR5;A0A087WVF5	G-protein-signaling modulator 1	GPSM1	tr|A0A0A0MSK4|A0A0A0MSK4_HUMAN G-protein-signaling modulator 1 OS=Homo sapiens OX=9606 GN=GPSM1 PE=1 SV=1;tr|A0A0A0MRC4|A0A0A0MRC4_HUMAN G-protein-signaling modulator 1 OS=Homo sapiens OX=9606 GN=GPSM1 PE=1 SV=2;sp|Q86YR5|GPSM1_HUMAN G-protein-signaling mo	0	657	0	2382100	967	0.00104195	0	627	0	4	2	2	4.4	74.481	675	0	11.858	2382100	1			53
X6RCK5;X6RLR1;O75935;X6RA56;A0A0A0MRV8	Dynactin subunit 3	DCTN3	tr|X6RCK5|X6RCK5_HUMAN Dynactin subunit 3 (Fragment) OS=Homo sapiens OX=9606 GN=DCTN3 PE=1 SV=1;tr|X6RLR1|X6RLR1_HUMAN Dynactin subunit 3 OS=Homo sapiens OX=9606 GN=DCTN3 PE=1 SV=1;sp|O75935|DCTN3_HUMAN Dynactin subunit 3 OS=Homo sapiens OX=9606 GN=DCTN3 P	91912	575	0.000987022	2375600	968	0.00103911	251280	521	0.00193216	5	3	3	23.2	17.299	151	0	20.899	2718800	6			555
Q5T8A0;Q9Y399	28S ribosomal protein S2, mitochondrial	MRPS2	tr|Q5T8A0|Q5T8A0_HUMAN 28S ribosomal protein S2, mitochondrial (Fragment) OS=Homo sapiens OX=9606 GN=MRPS2 PE=1 SV=1;sp|Q9Y399|RT02_HUMAN 28S ribosomal protein S2, mitochondrial OS=Homo sapiens OX=9606 GN=MRPS2 PE=1 SV=1	0	657	0	2366200	969	0.001035	0	627	0	2	2	2	6.7	30.479	270	0.0010081	11.288	2366200	2			1013
E9PK21;Q9UNP9	Peptidyl-prolyl cis-trans isomerase E	PPIE	tr|E9PK21|E9PK21_HUMAN Peptidyl-prolyl cis-trans isomerase E OS=Homo sapiens OX=9606 GN=PPIE PE=1 SV=1;sp|Q9UNP9|PPIE_HUMAN Peptidyl-prolyl cis-trans isomerase E OS=Homo sapiens OX=9606 GN=PPIE PE=1 SV=1	0	657	0	2362400	970	0.00103334	0	627	0	2	1	1	12	22.788	208	0.0060345	6.4199	2362400	1			297
O95816	BAG family molecular chaperone regulator 2	BAG2	sp|O95816|BAG2_HUMAN BAG family molecular chaperone regulator 2 OS=Homo sapiens OX=9606 GN=BAG2 PE=1 SV=1	0	657	0	2350200	971	0.001028	269810	503	0.00207464	1	2	2	15.6	23.772	211	0	12.87	2620000	3			571
J3KS14;F5H478;J3KRU5;X6R3T8;J3QLH3;J3QQJ0;Q9UHR5	SAP30-binding protein	SAP30BP	tr|J3KS14|J3KS14_HUMAN SAP30-binding protein (Fragment) OS=Homo sapiens OX=9606 GN=SAP30BP PE=1 SV=1;tr|F5H478|F5H478_HUMAN SAP30-binding protein OS=Homo sapiens OX=9606 GN=SAP30BP PE=1 SV=1;tr|J3KRU5|J3KRU5_HUMAN SAP30 binding protein, isoform CRA_f OS=Ho	0	657	0	2343100	972	0.0010249	0	627	0	7	1	1	14.4	11.594	104	0	21.668	2343100	1			323
Q9NUG6	p53 and DNA damage-regulated protein 1	PDRG1	sp|Q9NUG6|PDRG1_HUMAN p53 and DNA damage-regulated protein 1 OS=Homo sapiens OX=9606 GN=PDRG1 PE=1 SV=2	0	657	0	2333200	973	0.00102056	0	627	0	1	1	1	12.8	15.511	133	0.0028846	8.633	2333200	2			1174
Q96A49	Synapse-associated protein 1	SYAP1	sp|Q96A49|SYAP1_HUMAN Synapse-associated protein 1 OS=Homo sapiens OX=9606 GN=SYAP1 PE=1 SV=1	954760	233	0.010253	2323800	974	0.00101645	1214200	270	0.0093363	1	6	6	27.8	39.933	352	0	134.47	4492800	11			1094
K7EKS1;P36954	DNA-directed RNA polymerase II subunit RPB9	POLR2I	tr|K7EKS1|K7EKS1_HUMAN DNA-directed RNA polymerase II subunit RPB9 OS=Homo sapiens OX=9606 GN=POLR2I PE=1 SV=1;sp|P36954|RPB9_HUMAN DNA-directed RNA polymerase II subunit RPB9 OS=Homo sapiens OX=9606 GN=POLR2I PE=1 SV=1	0	657	0	2315300	975	0.00101274	0	627	0	2	1	1	26.1	10.245	88	0.0053381	6.6672	2315300	2			430
Q9UL42	Paraneoplastic antigen Ma2	PNMA2	sp|Q9UL42|PNMA2_HUMAN Paraneoplastic antigen Ma2 OS=Homo sapiens OX=9606 GN=PNMA2 PE=1 SV=2	0	657	0	2314200	976	0.00101225	0	627	0	1	2	2	10.2	41.509	364	0	14.205	2314200	4			1211
H0YLQ3;H0YM23;O75179;H7C2F5;H3BLS9;E9PDP5;Q8IWZ3	Ankyrin repeat domain-containing protein 17;Ankyrin repeat and KH domain-containing protein 1	ANKRD17;ANKHD1	tr|H0YLQ3|H0YLQ3_HUMAN Ankyrin repeat domain-containing protein 17 (Fragment) OS=Homo sapiens OX=9606 GN=ANKRD17 PE=1 SV=1;tr|H0YM23|H0YM23_HUMAN Ankyrin repeat domain-containing protein 17 (Fragment) OS=Homo sapiens OX=9606 GN=ANKRD17 PE=1 SV=1;sp|O75179|	0	657	0	2304700	977	0.0010081	0	627	0	7	2	2	4.2	91.926	862	0	13.414	2304700	2			382
P62857	40S ribosomal protein S28	RPS28	sp|P62857|RS28_HUMAN 40S ribosomal protein S28 OS=Homo sapiens OX=9606 GN=RPS28 PE=1 SV=1	0	657	0	2298700	978	0.00100547	0	627	0	1	1	1	17.4	7.8409	69	0.0029211	10.132	2298700	2			867
Q9UJW0;E5RI97;E5RGG1;H9KVE0	Dynactin subunit 4	DCTN4	sp|Q9UJW0|DCTN4_HUMAN Dynactin subunit 4 OS=Homo sapiens OX=9606 GN=DCTN4 PE=1 SV=1	181310	464	0.00194705	2294100	979	0.00100346	918250	304	0.00706066	4	6	6	18.5	52.337	460	0	40.422	3393700	7			1207
H7BY94;Q13895	Bystin	BYSL	tr|H7BY94|H7BY94_HUMAN Bystin (Fragment) OS=Homo sapiens OX=9606 GN=BYSL PE=1 SV=1;sp|Q13895|BYST_HUMAN Bystin OS=Homo sapiens OX=9606 GN=BYSL PE=1 SV=3	56358	631	0.000605216	2290700	980	0.00100197	114130	603	0.000877575	2	1	1	4.9	20.89	183	0	28.706	2461100	3			392
A0A087WU64;A6NMQ1;P09884	DNA polymerase;DNA polymerase alpha catalytic subunit	POLA1	tr|A0A087WU64|A0A087WU64_HUMAN DNA polymerase OS=Homo sapiens OX=9606 GN=POLA1 PE=1 SV=1;tr|A6NMQ1|A6NMQ1_HUMAN DNA polymerase OS=Homo sapiens OX=9606 GN=POLA1 PE=1 SV=1;sp|P09884|DPOLA_HUMAN DNA polymerase alpha catalytic subunit OS=Homo sapiens OX=9606 G	0	657	0	2274800	981	0.00099502	143170	581	0.00110087	3	2	2	2.9	165.77	1461	0.002947	10.621	2418000	1			14
B5MCW2;H7C422;G5E9G0;P39023;H7C3M2;Q92901	60S ribosomal protein L3;60S ribosomal protein L3-like	RPL3;RPL3L	tr|B5MCW2|B5MCW2_HUMAN 60S ribosomal protein L3 (Fragment) OS=Homo sapiens OX=9606 GN=RPL3 PE=1 SV=1;tr|H7C422|H7C422_HUMAN 60S ribosomal protein L3 (Fragment) OS=Homo sapiens OX=9606 GN=RPL3 PE=1 SV=1;tr|G5E9G0|G5E9G0_HUMAN 60S ribosomal protein L3 OS=Hom	125100	533	0.00134342	2274000	982	0.00099467	0	627	0	6	2	2	13.6	31.243	272	0	13.183	2399100	2			197
A0A2R8Y2X6;A1A5D9	Bicaudal D-related protein 2	CCDC64B	tr|A0A2R8Y2X6|A0A2R8Y2X6_HUMAN BICD family-like cargo adapter 2 OS=Homo sapiens OX=9606 GN=BICDL2 PE=1 SV=1;sp|A1A5D9|BICL2_HUMAN BICD family-like cargo adapter 2 OS=Homo sapiens OX=9606 GN=BICDL2 PE=1 SV=2	0	657	0	2272800	983	0.000994145	0	627	0	2	1	1	3.1	60.717	541	0.0045167	6.781	2272800	1			99
Q9Y3I0	tRNA-splicing ligase RtcB homolog	RTCB	sp|Q9Y3I0|RTCB_HUMAN RNA-splicing ligase RtcB homolog OS=Homo sapiens OX=9606 GN=RTCB PE=1 SV=1	0	657	0	2269400	984	0.000992658	0	627	0	1	1	1	1.8	55.21	505	0.0028571	8.1013	2269400	1			1233
J3KSS8		SLC47A1	tr|J3KSS8|J3KSS8_HUMAN Multidrug and toxin extrusion protein 1 OS=Homo sapiens OX=9606 GN=SLC47A1 PE=1 SV=1	0	657	0	2259300	985	0.00098824	0	627	0	1	1	1	3.2	34.3	316	1	-2	2259300	0	+		412
P61026;A0A2R8YDI9;H0YLJ8;H0YL94;H0YMN7;H0YNE9;G3V196;A0A2R8YFB8;P51153;Q92930;P61006;P59190	Ras-related protein Rab-10;Ras-related protein Rab-13;Ras-related protein Rab-8B;Ras-related protein Rab-8A;Ras-related protein Rab-15	RAB10;RAB8B;RAB15;RAB13;RAB8A	sp|P61026|RAB10_HUMAN Ras-related protein Rab-10 OS=Homo sapiens OX=9606 GN=RAB10 PE=1 SV=1;tr|A0A2R8YDI9|A0A2R8YDI9_HUMAN Ras-related protein Rab-15 OS=Homo sapiens OX=9606 GN=RAB15 PE=1 SV=1;tr|H0YLJ8|H0YLJ8_HUMAN Ras-related protein Rab-8B OS=Homo sapie	283860	399	0.00304831	2258900	986	0.000988065	0	627	0	12	2	1	11	22.541	200	0	20.276	2542800	3			836
Q9H6T3	RNA polymerase II-associated protein 3	RPAP3	sp|Q9H6T3|RPAP3_HUMAN RNA polymerase II-associated protein 3 OS=Homo sapiens OX=9606 GN=RPAP3 PE=1 SV=2	0	657	0	2237400	987	0.000978661	0	627	0	1	2	2	4.1	75.718	665	0	15.193	2237400	2			1155
C9JTK6;J3KQ32;Q9NTK5	Obg-like ATPase 1	OLA1	tr|C9JTK6|C9JTK6_HUMAN Obg-like ATPase 1 (Fragment) OS=Homo sapiens OX=9606 GN=OLA1 PE=1 SV=1;tr|J3KQ32|J3KQ32_HUMAN Obg-like ATPase 1 OS=Homo sapiens OX=9606 GN=OLA1 PE=1 SV=1;sp|Q9NTK5|OLA1_HUMAN Obg-like ATPase 1 OS=Homo sapiens OX=9606 GN=OLA1 PE=1 SV=	0	657	0	2229500	988	0.000975205	0	627	0	3	1	1	12.9	12.302	116	0	16.909	2229500	3			234
A0A3B3IRW2;A0A3B3IRK6;Q13724;A0A3B3IS52	Mannosyl-oligosaccharide glucosidase	MOGS	tr|A0A3B3IRW2|A0A3B3IRW2_HUMAN Mannosyl-oligosaccharide glucosidase OS=Homo sapiens OX=9606 GN=MOGS PE=1 SV=1;tr|A0A3B3IRK6|A0A3B3IRK6_HUMAN Mannosyl-oligosaccharide glucosidase (Fragment) OS=Homo sapiens OX=9606 GN=MOGS PE=1 SV=1;sp|Q13724|MOGS_HUMAN Mann	0	657	0	2201600	989	0.000963002	0	627	0	4	2	2	5.3	62.248	562	0	17.013	2201600	3			124
Q5QPK2;H0Y368;O60762;Q5QPJ9	Dolichol-phosphate mannosyltransferase subunit 1	DPM1	tr|Q5QPK2|Q5QPK2_HUMAN Dolichol-phosphate mannosyltransferase subunit 1 OS=Homo sapiens OX=9606 GN=DPM1 PE=1 SV=1;tr|H0Y368|H0Y368_HUMAN Dolichol-phosphate mannosyltransferase subunit 1 (Fragment) OS=Homo sapiens OX=9606 GN=DPM1 PE=1 SV=1;sp|O60762|DPM1_HU	110880	550	0.00119072	2191200	990	0.000958453	0	627	0	4	3	3	13.2	32.426	287	0	38.395	2302100	5			362
X6RFN3;Q99496;Q06587	E3 ubiquitin-protein ligase RING2;E3 ubiquitin-protein ligase RING1	RNF2;RING1	tr|X6RFN3|X6RFN3_HUMAN E3 ubiquitin-protein ligase RING2 (Fragment) OS=Homo sapiens OX=9606 GN=RNF2 PE=1 SV=2;sp|Q99496|RING2_HUMAN E3 ubiquitin-protein ligase RING2 OS=Homo sapiens OX=9606 GN=RNF2 PE=1 SV=1;sp|Q06587|RING1_HUMAN E3 ubiquitin-protein ligas	0	657	0	2187100	991	0.000956659	0	627	0	3	1	1	5.7	27.277	245	0.0028436	7.8569	2187100	2			910
P31948;F5GXD8;F5H783	Stress-induced-phosphoprotein 1	STIP1	sp|P31948|STIP1_HUMAN Stress-induced-phosphoprotein 1 OS=Homo sapiens OX=9606 GN=STIP1 PE=1 SV=1	169160	476	0.00181657	2179200	992	0.000953204	0	627	0	3	3	3	7.7	62.639	543	0	22.242	2348300	3			721
A0A6Q8PFV4;H0YJZ6;Q9UPY3	Endoribonuclease Dicer	DICER1	tr|A0A6Q8PFV4|A0A6Q8PFV4_HUMAN Endoribonuclease Dicer (Fragment) OS=Homo sapiens OX=9606 GN=DICER1 PE=1 SV=1;tr|H0YJZ6|H0YJZ6_HUMAN Endoribonuclease Dicer OS=Homo sapiens OX=9606 GN=DICER1 PE=1 SV=2;sp|Q9UPY3|DICER_HUMAN Endoribonuclease Dicer OS=Homo sapi	0	657	0	2172400	993	0.000950229	0	627	0	3	1	1	4.4	41.81	364	1	-2	2172400	1	+		159
Q99575	Ribonucleases P/MRP protein subunit POP1	POP1	sp|Q99575|POP1_HUMAN Ribonucleases P/MRP protein subunit POP1 OS=Homo sapiens OX=9606 GN=POP1 PE=1 SV=2	0	657	0	2140400	994	0.000936232	0	627	0	1	1	1	1.5	114.71	1024	0.0045496	6.8638	2140400	1			1119
E9PI14;Q9NX20	39S ribosomal protein L16, mitochondrial	MRPL16	tr|E9PI14|E9PI14_HUMAN 39S ribosomal protein L16, mitochondrial (Fragment) OS=Homo sapiens OX=9606 GN=MRPL16 PE=1 SV=1;sp|Q9NX20|RM16_HUMAN 39S ribosomal protein L16, mitochondrial OS=Homo sapiens OX=9606 GN=MRPL16 PE=1 SV=1	0	657	0	2136500	995	0.000934526	0	627	0	2	1	1	18.6	9.5822	86	0.006087	6.4702	2136500	1			294
D6RJC7;D6RH20;G5EA06;Q92552	28S ribosomal protein S27, mitochondrial	MRPS27	tr|D6RJC7|D6RJC7_HUMAN 28S ribosomal protein S27, mitochondrial OS=Homo sapiens OX=9606 GN=MRPS27 PE=1 SV=1;tr|D6RH20|D6RH20_HUMAN 28S ribosomal protein S27, mitochondrial (Fragment) OS=Homo sapiens OX=9606 GN=MRPS27 PE=1 SV=1;tr|G5EA06|G5EA06_HUMAN 28S ri	0	657	0	2131000	996	0.000932121	0	627	0	4	1	1	6.1	23.197	197	0.0028653	8.2252	2131000	1			257
E9PHH9;Q9BUI4	DNA-directed RNA polymerase III subunit RPC3	POLR3C	tr|E9PHH9|E9PHH9_HUMAN DNA-directed RNA polymerase III subunit RPC3 OS=Homo sapiens OX=9606 GN=POLR3C PE=1 SV=1;sp|Q9BUI4|RPC3_HUMAN DNA-directed RNA polymerase III subunit RPC3 OS=Homo sapiens OX=9606 GN=POLR3C PE=1 SV=1	0	657	0	2121300	997	0.000927878	0	627	0	2	1	1	4.1	46.189	411	0	11.947	2121300	2			292
M0QZR4;Q92888;M0QZH8;M0R2C7;M0QYS3;M0QYC1	Rho guanine nucleotide exchange factor 1	ARHGEF1	tr|M0QZR4|M0QZR4_HUMAN Rho guanine nucleotide exchange factor 1 OS=Homo sapiens OX=9606 GN=ARHGEF1 PE=1 SV=1;sp|Q92888|ARHG1_HUMAN Rho guanine nucleotide exchange factor 1 OS=Homo sapiens OX=9606 GN=ARHGEF1 PE=1 SV=2;tr|M0QZH8|M0QZH8_HUMAN Rho guanine nucl	0	657	0	2099200	998	0.000918211	0	627	0	6	4	4	6	108.32	968	0	27.131	2099200	4			469
Q9NPQ8;E9PSI0;H0YEN0	Synembryn-A	RIC8A	sp|Q9NPQ8|RIC8A_HUMAN Synembryn-A OS=Homo sapiens OX=9606 GN=RIC8A PE=1 SV=3;tr|E9PSI0|E9PSI0_HUMAN Synembryn-A (Fragment) OS=Homo sapiens OX=9606 GN=RIC8A PE=1 SV=1	0	657	0	2067300	999	0.000904258	0	627	0	3	3	3	6.4	59.709	531	0	17.052	2067300	4			1165
D6RAA6;P57088	Transmembrane protein 33	TMEM33	tr|D6RAA6|D6RAA6_HUMAN Transmembrane protein 33 (Fragment) OS=Homo sapiens OX=9606 GN=TMEM33 PE=1 SV=1;sp|P57088|TMM33_HUMAN Transmembrane protein 33 OS=Homo sapiens OX=9606 GN=TMEM33 PE=1 SV=2	0	657	0	2066900	1000	0.000904083	0	627	0	2	1	1	5.4	25.223	222	0.0052448	6.4948	2066900	1			251
B1AH59;Q9H1I8	Activating signal cointegrator 1 complex subunit 2	ASCC2	tr|B1AH59|B1AH59_HUMAN Activating signal cointegrator 1 complex subunit 2 (Fragment) OS=Homo sapiens OX=9606 GN=ASCC2 PE=1 SV=1;sp|Q9H1I8|ASCC2_HUMAN Activating signal cointegrator 1 complex subunit 2 OS=Homo sapiens OX=9606 GN=ASCC2 PE=1 SV=3	0	657	0	2062600	1001	0.000902202	0	627	0	2	2	2	11.7	27.52	240	0	14.433	2062600	3			182
B4DXW1;P61158;A0A0A0MTI9;H7C4J1;C9IZN3;Q9C0K3;Q9P1U1	Actin-related protein 3;Actin-related protein 3C;Actin-related protein 3B	ACTR3;ACTR3C;ACTR3B	tr|B4DXW1|B4DXW1_HUMAN Actin-like protein 3 OS=Homo sapiens OX=9606 GN=ACTR3 PE=1 SV=1;sp|P61158|ARP3_HUMAN Actin-related protein 3 OS=Homo sapiens OX=9606 GN=ACTR3 PE=1 SV=3;tr|A0A0A0MTI9|A0A0A0MTI9_HUMAN Actin-related protein 3C OS=Homo sapiens OX=9606 G	25266	652	0.000271326	2058000	1002	0.00090019	0	627	0	7	2	2	6.3	42.003	367	0	13.589	2083300	3			192
A0A5F9ZHL7;E9PRQ6;A0A5F9ZHH9;A0A5F9ZHJ7;A0A5F9ZHL1;P24752	Acetyl-CoA acetyltransferase, mitochondrial	ACAT1	tr|A0A5F9ZHL7|A0A5F9ZHL7_HUMAN Acetyl-CoA acetyltransferase, mitochondrial OS=Homo sapiens OX=9606 GN=ACAT1 PE=1 SV=1;tr|E9PRQ6|E9PRQ6_HUMAN Acetyl-CoA acetyltransferase, mitochondrial OS=Homo sapiens OX=9606 GN=ACAT1 PE=1 SV=1;tr|A0A5F9ZHH9|A0A5F9ZHH9_HUM	0	657	0	2040700	1003	0.000892622	0	627	0	6	1	1	16	11.349	106	0	16.059	2040700	2			147
P21912;A0A087WXX8;A0A087WWT1	Succinate dehydrogenase [ubiquinone] iron-sulfur subunit, mitochondrial	SDHB	sp|P21912|SDHB_HUMAN Succinate dehydrogenase [ubiquinone] iron-sulfur subunit, mitochondrial OS=Homo sapiens OX=9606 GN=SDHB PE=1 SV=3;tr|A0A087WXX8|A0A087WXX8_HUMAN Iron-sulfur subunit of complex II (Fragment) OS=Homo sapiens OX=9606 GN=SDHB PE=1 SV=1;tr|	114790	547	0.0012327	2037800	1004	0.000891354	0	627	0	3	3	3	12.1	31.629	280	0	17.438	2152600	3			670
Q96A65	Exocyst complex component 4	EXOC4	sp|Q96A65|EXOC4_HUMAN Exocyst complex component 4 OS=Homo sapiens OX=9606 GN=EXOC4 PE=1 SV=1	0	657	0	2016600	1005	0.000882081	0	627	0	1	1	1	1.5	110.5	974	0.0083893	6.2706	2016600	2			1095
E9PS77;Q9NW68	BSD domain-containing protein 1	BSDC1	tr|E9PS77|E9PS77_HUMAN BSD domain-containing protein 1 (Fragment) OS=Homo sapiens OX=9606 GN=BSDC1 PE=1 SV=1;sp|Q9NW68|BSDC1_HUMAN BSD domain-containing protein 1 OS=Homo sapiens OX=9606 GN=BSDC1 PE=1 SV=1	0	657	0	2015500	1006	0.0008816	0	627	0	2	1	1	12.2	17.397	156	0	31.259	2015500	3			310
A0A3B3ITM0;H3BTM2;A0A1W2PP38;P63096;P09471;P08754;P04899	Guanine nucleotide-binding protein G(i) subunit alpha-1;Guanine nucleotide-binding protein G(o) subunit alpha;Guanine nucleotide-binding protein G(k) subunit alpha;Guanine nucleotide-binding protein G(i) subunit alpha-2	GNAO1;GNAI1;GNAI3;GNAI2	tr|A0A3B3ITM0|A0A3B3ITM0_HUMAN Guanine nucleotide-binding protein G(i) subunit alpha-1 (Fragment) OS=Homo sapiens OX=9606 GN=GNAI1 PE=1 SV=1;tr|H3BTM2|H3BTM2_HUMAN Guanine nucleotide-binding protein G(o) subunit alpha (Fragment) OS=Homo sapiens OX=9606 GN=	0	657	0	1999000	1007	0.000874383	0	627	0	7	1	1	7.1	19.693	168	0.002809	7.522	1999000	2			93
Q9UBK9;S4R2Z4	Protein UXT	UXT	sp|Q9UBK9|UXT_HUMAN Protein UXT OS=Homo sapiens OX=9606 GN=UXT PE=1 SV=1;tr|S4R2Z4|S4R2Z4_HUMAN Protein UXT OS=Homo sapiens OX=9606 GN=UXT PE=1 SV=1	65020	618	0.000698235	1998700	1008	0.000874251	200080	546	0.00153847	2	2	2	15.9	18.246	157	0.0010277	11.617	2263800	4			1191
K7EPP1;K7EN03;Q8WUF5	RelA-associated inhibitor	PPP1R13L	tr|K7EPP1|K7EPP1_HUMAN RelA-associated inhibitor (Fragment) OS=Homo sapiens OX=9606 GN=PPP1R13L PE=1 SV=1;tr|K7EN03|K7EN03_HUMAN RelA-associated inhibitor (Fragment) OS=Homo sapiens OX=9606 GN=PPP1R13L PE=1 SV=1;sp|Q8WUF5|IASPP_HUMAN RelA-associated inhibi	0	657	0	1992900	1009	0.000871714	0	627	0	3	1	1	30	6.7435	60	1	-2	1992900	0	+		432
Q10713	Mitochondrial-processing peptidase subunit alpha	PMPCA	sp|Q10713|MPPA_HUMAN Mitochondrial-processing peptidase subunit alpha OS=Homo sapiens OX=9606 GN=PMPCA PE=1 SV=2	0	657	0	1990500	1010	0.000870665	0	627	0	1	1	1	3.4	58.252	525	0.0044964	6.7359	1990500	2			920
P36406	E3 ubiquitin-protein ligase TRIM23	TRIM23	sp|P36406|TRI23_HUMAN E3 ubiquitin-protein ligase TRIM23 OS=Homo sapiens OX=9606 GN=TRIM23 PE=1 SV=1	0	657	0	1988200	1011	0.000869658	0	627	0	1	1	1	1.7	64.066	574	0.004529	6.7896	1988200	1			736
K7EJ37;Q01780	Exosome component 10	EXOSC10	tr|K7EJ37|K7EJ37_HUMAN Exosome component 10 OS=Homo sapiens OX=9606 GN=EXOSC10 PE=1 SV=1;sp|Q01780|EXOSX_HUMAN Exosome component 10 OS=Homo sapiens OX=9606 GN=EXOSC10 PE=1 SV=2	0	657	0	1960000	1012	0.000857324	0	627	0	2	1	1	8.9	13.706	124	0.0027473	7.0043	1960000	1			424
R4GMQ1;O60341	Lysine-specific histone demethylase 1A	KDM1A	tr|R4GMQ1|R4GMQ1_HUMAN Lysine-specific histone demethylase OS=Homo sapiens OX=9606 GN=KDM1A PE=1 SV=2;sp|O60341|KDM1A_HUMAN Lysine-specific histone demethylase 1A OS=Homo sapiens OX=9606 GN=KDM1A PE=1 SV=2	0	657	0	1957000	1013	0.000856011	0	627	0	2	1	1	2.8	93.596	858	0.0028275	7.7323	1957000	1			528
A0A087WTZ5;E9PJ81;E9PRQ7;Q04323	UBX domain-containing protein 1	UBXN1	tr|A0A087WTZ5|A0A087WTZ5_HUMAN UBX domain-containing protein 1 OS=Homo sapiens OX=9606 GN=UBXN1 PE=1 SV=1;tr|E9PJ81|E9PJ81_HUMAN UBX domain-containing protein 1 (Fragment) OS=Homo sapiens OX=9606 GN=UBXN1 PE=1 SV=1;tr|E9PRQ7|E9PRQ7_HUMAN UBX domain-contain	0	657	0	1948800	1014	0.000852425	0	627	0	4	1	1	8	27.015	238	0.0045005	6.7472	1948800	1			12
O00442	RNA 3-terminal phosphate cyclase	RTCA	sp|O00442|RTCA_HUMAN RNA 3-terminal phosphate cyclase OS=Homo sapiens OX=9606 GN=RTCA PE=1 SV=1	0	657	0	1942600	1015	0.000849713	0	627	0	1	1	1	2.7	39.336	366	0.0029268	10.201	1942600	2			487
F5H702;Q96GC5	39S ribosomal protein L48, mitochondrial	MRPL48	tr|F5H702|F5H702_HUMAN 39S ribosomal protein L48, mitochondrial OS=Homo sapiens OX=9606 GN=MRPL48 PE=1 SV=1;sp|Q96GC5|RM48_HUMAN 39S ribosomal protein L48, mitochondrial OS=Homo sapiens OX=9606 GN=MRPL48 PE=1 SV=2	0	657	0	1921800	1016	0.000840614	0	627	0	2	1	1	10.6	12.77	113	0.0084531	6.2986	1921800	1			328
E7ETF9;Q9BV73	Centrosome-associated protein CEP250	CEP250	tr|E7ETF9|E7ETF9_HUMAN Centrosome-associated protein CEP250 (Fragment) OS=Homo sapiens OX=9606 GN=CEP250 PE=1 SV=1;sp|Q9BV73|CP250_HUMAN Centrosome-associated protein CEP250 OS=Homo sapiens OX=9606 GN=CEP250 PE=1 SV=2	0	657	0	1913000	1017	0.000836765	0	627	0	2	1	1	1.9	78.571	684	1	-2	1913000	1	+		274
A0A3B3ITP0;A0A2R8Y6D0;A0A2R8Y420;A0A2R8Y7N0;A0A2R8Y7Y3;Q4VB86;A0A2R8YD30;A0A2R8YFR9;A0A2R8Y6G5;A0A2R8Y570;A0A2R8Y5G2;A0A2R8Y5Z6;A0A3B3IU06;A0A2U3TZH6;P11171;A0A2R8Y6T6;A0A3B3ITC5	Protein 4.1	EPB41	tr|A0A3B3ITP0|A0A3B3ITP0_HUMAN Band 4.1 OS=Homo sapiens OX=9606 GN=EPB41 PE=1 SV=1;tr|A0A2R8Y6D0|A0A2R8Y6D0_HUMAN Band 4.1 OS=Homo sapiens OX=9606 GN=EPB41 PE=1 SV=1;tr|A0A2R8Y420|A0A2R8Y420_HUMAN Band 4.1 OS=Homo sapiens OX=9606 GN=EPB41 PE=1 SV=1;tr|A0A2	0	657	0	1885200	1018	0.000824605	0	627	0	17	2	1	4.6	60.539	542	0.0029791	10.927	1885200	1			100
F5GWI9;F5GXZ7;F5GZ97;Q9Y3C0	WASH complex subunit CCDC53	CCDC53	tr|F5GWI9|F5GWI9_HUMAN Coiled-coil domain-containing protein 53 OS=Homo sapiens OX=9606 GN=WASHC3 PE=1 SV=1;tr|F5GXZ7|F5GXZ7_HUMAN Coiled-coil domain-containing protein 53 OS=Homo sapiens OX=9606 GN=WASHC3 PE=1 SV=1;tr|F5GZ97|F5GZ97_HUMAN Coiled-coil domai	0	657	0	1868800	1019	0.000817432	0	627	0	4	1	1	7.1	18.534	169	0.0027523	7.0172	1868800	2			315
A0A087WYC0;A0A6Q8KRG2;Q08379	Golgin subfamily A member 2	GOLGA2	tr|A0A087WYC0|A0A087WYC0_HUMAN Golgin subfamily A member 2 OS=Homo sapiens OX=9606 GN=GOLGA2 PE=1 SV=1;tr|A0A6Q8KRG2|A0A6Q8KRG2_HUMAN Golgin subfamily A member 2 OS=Homo sapiens OX=9606 GN=GOLGA2 PE=1 SV=1;sp|Q08379|GOGA2_HUMAN Golgin subfamily A member 2	0	657	0	1842800	1020	0.000806059	0	627	0	3	1	1	3.5	31.894	286	0	11.746	1842800	2			31
H7C2R7;P52788	Spermine synthase	SMS	tr|H7C2R7|H7C2R7_HUMAN Spermine synthase (Fragment) OS=Homo sapiens OX=9606 GN=SMS PE=1 SV=1;sp|P52788|SPSY_HUMAN Spermine synthase OS=Homo sapiens OX=9606 GN=SMS PE=1 SV=2	0	657	0	1841700	1021	0.000805578	0	627	0	2	1	1	5.8	33.367	311	0	32.624	1841700	3			396
Q6NXE6;F5H7V0;F5GZP0;F5H3X1;F5H052;F5H2X2;F5H2K4;F5GWV0;F5H4P3;B4E1N1	Armadillo repeat-containing protein 6	ARMC6	sp|Q6NXE6|ARMC6_HUMAN Armadillo repeat-containing protein 6 OS=Homo sapiens OX=9606 GN=ARMC6 PE=1 SV=2;tr|F5H7V0|F5H7V0_HUMAN Armadillo repeat-containing protein 6 (Fragment) OS=Homo sapiens OX=9606 GN=ARMC6 PE=1 SV=1;tr|F5GZP0|F5GZP0_HUMAN Armadillo repea	0	657	0	1840500	1022	0.000805053	0	627	0	10	2	2	5.8	54.141	501	0.0010246	11.584	1840500	2			1023
G3V1A1;E9PKZ0;E9PKU4;P62917	60S ribosomal protein L8	RPL8	tr|G3V1A1|G3V1A1_HUMAN 60S ribosomal protein L8 OS=Homo sapiens OX=9606 GN=RPL8 PE=1 SV=1;tr|E9PKZ0|E9PKZ0_HUMAN 60S ribosomal protein L8 (Fragment) OS=Homo sapiens OX=9606 GN=RPL8 PE=1 SV=1;tr|E9PKU4|E9PKU4_HUMAN 60S ribosomal protein L8 (Fragment) OS=Hom	69825	607	0.000749835	1838100	1023	0.000804003	0	627	0	4	2	2	25.1	18.169	167	0	11.808	1907900	3			301
E9PCX2;P15121	Aldose reductase	AKR1B1	tr|E9PCX2|E9PCX2_HUMAN Aldo-keto reductase family 1 member B1 OS=Homo sapiens OX=9606 GN=AKR1B1 PE=1 SV=1;sp|P15121|ALDR_HUMAN Aldo-keto reductase family 1 member B1 OS=Homo sapiens OX=9606 GN=AKR1B1 PE=1 SV=3	0	657	0	1828200	1024	0.000799673	0	627	0	2	1	1	6.8	29.445	263	0.0099585	6.1859	1828200	1			284
Q66K74;M0R1M7	Microtubule-associated protein 1S;MAP1S heavy chain;MAP1S light chain	MAP1S	sp|Q66K74|MAP1S_HUMAN Microtubule-associated protein 1S OS=Homo sapiens OX=9606 GN=MAP1S PE=1 SV=2;tr|M0R1M7|M0R1M7_HUMAN Microtubule-associated protein 1S (Fragment) OS=Homo sapiens OX=9606 GN=MAP1S PE=1 SV=1	59406	627	0.000637948	1814600	1025	0.000793724	0	627	0	2	2	2	3.4	112.21	1059	0	12.96	1874000	4			1020
Q5T6V7;Q5T6V5	UPF0553 protein C9orf64	C9orf64	tr|Q5T6V7|Q5T6V7_HUMAN Queuosine salvage protein OS=Homo sapiens OX=9606 GN=C9orf64 PE=1 SV=1;sp|Q5T6V5|QSPP_HUMAN Queuosine salvage protein OS=Homo sapiens OX=9606 GN=C9orf64 PE=1 SV=1	0	657	0	1797800	1026	0.000786376	0	627	0	2	1	1	5	23.275	200	0	11.749	1797800	1			1012
Q9H307	Pinin	PNN	sp|Q9H307|PININ_HUMAN Pinin OS=Homo sapiens OX=9606 GN=PNN PE=1 SV=5	0	657	0	1755400	1027	0.000767829	0	627	0	1	1	1	2.4	81.627	717	0.0084388	6.2968	1755400	1			1153
E9PIZ4;E9PSD5;E9PPQ5;Q9UHD1	Cysteine and histidine-rich domain-containing protein 1	CHORDC1	tr|E9PIZ4|E9PIZ4_HUMAN Cysteine and histidine-rich domain-containing protein 1 OS=Homo sapiens OX=9606 GN=CHORDC1 PE=1 SV=1;tr|E9PSD5|E9PSD5_HUMAN Cysteine and histidine-rich domain-containing protein 1 OS=Homo sapiens OX=9606 GN=CHORDC1 PE=1 SV=1;tr|E9PPQ	0	657	0	1751600	1028	0.000766167	0	627	0	4	1	1	13.8	13.143	116	0.009182	6.2421	1751600	1			296
F5H1D6;Q07864	DNA polymerase;DNA polymerase epsilon catalytic subunit A	POLE	tr|F5H1D6|F5H1D6_HUMAN DNA polymerase epsilon catalytic subunit OS=Homo sapiens OX=9606 GN=POLE PE=1 SV=1;sp|Q07864|DPOE1_HUMAN DNA polymerase epsilon catalytic subunit A OS=Homo sapiens OX=9606 GN=POLE PE=1 SV=5	81144	592	0.000871387	1750600	1029	0.00076573	0	627	0	2	2	2	1.5	258.35	2259	0	13.752	1831800	3			321
G8JLH9;P40763	Signal transducer and activator of transcription;Signal transducer and activator of transcription 3	STAT3	tr|G8JLH9|G8JLH9_HUMAN Signal transducer and activator of transcription OS=Homo sapiens OX=9606 GN=STAT3 PE=1 SV=1;sp|P40763|STAT3_HUMAN Signal transducer and activator of transcription 3 OS=Homo sapiens OX=9606 GN=STAT3 PE=1 SV=2	0	657	0	1735800	1030	0.000759256	0	627	0	2	1	1	2.5	76.138	672	0.0060086	6.39	1735800	1			360
Q9BSJ8	Extended synaptotagmin-1	ESYT1	sp|Q9BSJ8|ESYT1_HUMAN Extended synaptotagmin-1 OS=Homo sapiens OX=9606 GN=ESYT1 PE=1 SV=1	37960	646	0.000407644	1721700	1031	0.000753089	0	627	0	1	2	2	2.6	122.85	1104	0	17.27	1759700	3			1130
A0A494C1L5;H0YAC6;A0A494BZW2;E9PEM5;P50851;A0A494C0R9;A0A3B3IS13;H0Y9N9;A0A3B3ISK3;Q5T321;A0A0D9SF28;F5GXV7;Q8NFP9	Lipopolysaccharide-responsive and beige-like anchor protein	LRBA	tr|A0A494C1L5|A0A494C1L5_HUMAN Lipopolysaccharide-responsive and beige-like anchor protein OS=Homo sapiens OX=9606 GN=LRBA PE=1 SV=1;tr|H0YAC6|H0YAC6_HUMAN Lipopolysaccharide-responsive and beige-like anchor protein (Fragment) OS=Homo sapiens OX=9606 GN=LR	1828000	177	0.0196305	1689700	1032	0.000739092	1427600	254	0.0109772	13	9	9	4.3	317.79	2852	0	77.291	4945300	13			140
A0A669KB10;A0A669KBG8;Q92538	Golgi-specific brefeldin A-resistance guanine nucleotide exchange factor 1	GBF1	tr|A0A669KB10|A0A669KB10_HUMAN Golgi-specific brefeldin A-resistance guanine nucleotide exchange factor 1 OS=Homo sapiens OX=9606 GN=GBF1 PE=1 SV=1;tr|A0A669KBG8|A0A669KBG8_HUMAN Golgi-specific brefeldin A-resistance guanine nucleotide exchange factor 1 OS	50011	639	0.000537057	1688000	1033	0.000738348	0	627	0	3	2	2	2.1	209.21	1884	0.0029732	10.925	1738000	4			149
A0AVT1	Ubiquitin-like modifier-activating enzyme 6	UBA6	sp|A0AVT1|UBA6_HUMAN Ubiquitin-like modifier-activating enzyme 6 OS=Homo sapiens OX=9606 GN=UBA6 PE=1 SV=1	0	657	0	1659000	1034	0.000725663	0	627	0	1	2	2	3.2	117.97	1052	0.0029644	10.885	1659000	2			163
K7ERT7;Q99536	Synaptic vesicle membrane protein VAT-1 homolog	VAT1	tr|K7ERT7|K7ERT7_HUMAN Synaptic vesicle membrane protein VAT-1 homolog (Fragment) OS=Homo sapiens OX=9606 GN=VAT1 PE=1 SV=1;sp|Q99536|VAT1_HUMAN Synaptic vesicle membrane protein VAT-1 homolog OS=Homo sapiens OX=9606 GN=VAT1 PE=1 SV=2	0	657	0	1651600	1035	0.000722426	0	627	0	2	2	2	21.2	15.059	146	0.0010204	11.547	1651600	2			439
A0A1W2PQD2;Q9UBB4	Ataxin-10	ATXN10	tr|A0A1W2PQD2|A0A1W2PQD2_HUMAN Ataxin-10 OS=Homo sapiens OX=9606 GN=ATXN10 PE=1 SV=1;sp|Q9UBB4|ATX10_HUMAN Ataxin-10 OS=Homo sapiens OX=9606 GN=ATXN10 PE=1 SV=1	0	657	0	1633800	1036	0.00071464	0	627	0	2	3	3	8.9	44.602	395	0	21.86	1633800	4			95
H0YMF9;H0YL19;H0YN81;Q9GZS3;H3BQA8;H0YM76	WD repeat-containing protein 61;WD repeat-containing protein 61, N-terminally processed	WDR61	tr|H0YMF9|H0YMF9_HUMAN WD repeat-containing protein 61 OS=Homo sapiens OX=9606 GN=WDR61 PE=1 SV=1;tr|H0YL19|H0YL19_HUMAN WD repeat-containing protein 61 OS=Homo sapiens OX=9606 GN=WDR61 PE=1 SV=1;tr|H0YN81|H0YN81_HUMAN WD repeat-containing protein 61 (Frag	55795	632	0.00059917	1616900	1037	0.000707248	0	627	0	6	3	3	21.7	20.743	189	0	21.489	1672700	4			379
H7C2W9;C9JU56;B7Z4E3;B7Z4C8;P62899	60S ribosomal protein L31	RPL31	tr|H7C2W9|H7C2W9_HUMAN 60S ribosomal protein L31 (Fragment) OS=Homo sapiens OX=9606 GN=RPL31 PE=1 SV=1;tr|C9JU56|C9JU56_HUMAN 60S ribosomal protein L31 (Fragment) OS=Homo sapiens OX=9606 GN=RPL31 PE=1 SV=1;tr|B7Z4E3|B7Z4E3_HUMAN 60S ribosomal protein L31 O	54233	634	0.000582396	1604900	1038	0.000701999	0	627	0	5	2	2	21.3	12.701	108	0	13.873	1659200	3			201
H0YBW4;E5RIM3;Q9Y263	Phospholipase A-2-activating protein	PLAA	tr|H0YBW4|H0YBW4_HUMAN Phospholipase A-2-activating protein (Fragment) OS=Homo sapiens OX=9606 GN=PLAA PE=1 SV=1;tr|E5RIM3|E5RIM3_HUMAN Phospholipase A-2-activating protein OS=Homo sapiens OX=9606 GN=PLAA PE=1 SV=1;sp|Q9Y263|PLAP_HUMAN Phospholipase A-2-ac	0	657	0	1599700	1039	0.000699725	0	627	0	3	1	1	4.1	31.382	290	0.0060034	6.3873	1599700	1			264
A0A499FJN5;P22830	Ferrochelatase, mitochondrial	FECH	tr|A0A499FJN5|A0A499FJN5_HUMAN Ferrochelatase OS=Homo sapiens OX=9606 GN=FECH PE=1 SV=1;sp|P22830|HEMH_HUMAN Ferrochelatase, mitochondrial OS=Homo sapiens OX=9606 GN=FECH PE=1 SV=2	0	657	0	1599300	1040	0.00069955	0	627	0	2	1	1	4.3	40.23	351	0.0029183	9.9032	1599300	2			143
Q9NZ53	Podocalyxin-like protein 2	PODXL2	sp|Q9NZ53|PDXL2_HUMAN Podocalyxin-like protein 2 OS=Homo sapiens OX=9606 GN=PODXL2 PE=1 SV=1	0	657	0	1598900	1041	0.000699375	0	627	0	1	1	1	4.6	65.075	605	0.0027599	7.1341	1598900	1			1182
O95478	Ribosome biogenesis protein NSA2 homolog	NSA2	sp|O95478|NSA2_HUMAN Ribosome biogenesis protein NSA2 homolog OS=Homo sapiens OX=9606 GN=NSA2 PE=1 SV=1	138070	514	0.0014827	1590100	1042	0.000695526	0	627	0	1	1	1	4.2	30.065	260	0.009942	6.1711	1728200	3			569
Q7Z2Z2	Elongation factor Tu GTP-binding domain-containing protein 1	EFTUD1	sp|Q7Z2Z2|EFL1_HUMAN Elongation factor-like GTPase 1 OS=Homo sapiens OX=9606 GN=EFL1 PE=1 SV=2	0	657	0	1590000	1043	0.000695482	0	627	0	1	2	2	3.6	125.43	1120	0.001998	11.047	1590000	2			1042
Q8WVC0	RNA polymerase-associated protein LEO1	LEO1	sp|Q8WVC0|LEO1_HUMAN RNA polymerase-associated protein LEO1 OS=Homo sapiens OX=9606 GN=LEO1 PE=1 SV=1	0	657	0	1555200	1044	0.00068026	0	627	0	1	1	1	1.8	75.403	666	0.0027675	7.1965	1555200	1			1075
E9PIQ7;O00165	HCLS1-associated protein X-1	HAX1	tr|E9PIQ7|E9PIQ7_HUMAN HCLS1-associated protein X-1 OS=Homo sapiens OX=9606 GN=HAX1 PE=1 SV=1;sp|O00165|HAX1_HUMAN HCLS1-associated protein X-1 OS=Homo sapiens OX=9606 GN=HAX1 PE=1 SV=2	0	657	0	1553600	1045	0.00067956	0	627	0	2	1	1	15.9	17.167	151	0.0010299	11.673	1553600	1			295
Q16512	Serine/threonine-protein kinase N1	PKN1	sp|Q16512|PKN1_HUMAN Serine/threonine-protein kinase N1 OS=Homo sapiens OX=9606 GN=PKN1 PE=1 SV=2	0	657	0	1535900	1046	0.000671818	0	627	0	1	1	1	1.1	103.93	942	0.0045126	6.7716	1535900	1			989
A0A0G2JMS5;A0A087WU62;A0A087X2D5;Q9BRJ2	39S ribosomal protein L45, mitochondrial	MRPL45	tr|A0A0G2JMS5|A0A0G2JMS5_HUMAN 39S ribosomal protein L45, mitochondrial OS=Homo sapiens OX=9606 GN=MRPL45 PE=1 SV=1;tr|A0A087WU62|A0A087WU62_HUMAN 39S ribosomal protein L45, mitochondrial OS=Homo sapiens OX=9606 GN=MRPL45 PE=1 SV=1;tr|A0A087X2D5|A0A087X2D5	0	657	0	1533300	1047	0.000670681	0	627	0	4	1	1	7.8	29.408	256	0.0091743	6.2312	1533300	1			13
H7BZQ7;A0A024RBT2;H7BZK7;A0A2U3TZH2;Q9NR28	Diablo homolog, mitochondrial	DIABLO	tr|H7BZQ7|H7BZQ7_HUMAN Diablo homolog, mitochondrial (Fragment) OS=Homo sapiens OX=9606 GN=DIABLO PE=1 SV=2;tr|A0A024RBT2|A0A024RBT2_HUMAN Diablo homolog, mitochondrial OS=Homo sapiens OX=9606 GN=DIABLO PE=1 SV=1;tr|H7BZK7|H7BZK7_HUMAN Diablo homolog, mito	0	657	0	1533000	1048	0.000670549	0	627	0	5	1	1	13.4	14.355	127	0	35.736	1533000	2			3
B7Z4L4;P04843	Dolichyl-diphosphooligosaccharide--protein glycosyltransferase subunit 1	RPN1	tr|B7Z4L4|B7Z4L4_HUMAN Dolichyl-diphosphooligosaccharide--protein glycosyltransferase subunit 1 OS=Homo sapiens OX=9606 GN=RPN1 PE=1 SV=1;sp|P04843|RPN1_HUMAN Dolichyl-diphosphooligosaccharide--protein glycosyltransferase subunit 1 OS=Homo sapiens OX=9606	0	657	0	1512300	1049	0.000661495	0	627	0	2	1	1	3.9	49.921	435	0.0099502	6.1771	1512300	1			202
A0A2R8Y4S0;A0A2R8Y6A2;O15269	Serine palmitoyltransferase 1	SPTLC1	tr|A0A2R8Y4S0|A0A2R8Y4S0_HUMAN Serine palmitoyltransferase 1 OS=Homo sapiens OX=9606 GN=SPTLC1 PE=1 SV=1;tr|A0A2R8Y6A2|A0A2R8Y6A2_HUMAN Serine palmitoyltransferase 1 OS=Homo sapiens OX=9606 GN=SPTLC1 PE=1 SV=1;sp|O15269|SPTC1_HUMAN Serine palmitoyltransfer	0	657	0	1511600	1050	0.000661189	0	627	0	3	1	1	14	16	143	0.0045331	6.7998	1511600	0			102
Q15654	Thyroid receptor-interacting protein 6	TRIP6	sp|Q15654|TRIP6_HUMAN Thyroid receptor-interacting protein 6 OS=Homo sapiens OX=9606 GN=TRIP6 PE=1 SV=3	0	657	0	1500000	1051	0.000656115	0	627	0	1	1	1	4.4	50.287	476	0.0027985	7.4311	1500000	1			983
P52789	Hexokinase-2	HK2	sp|P52789|HXK2_HUMAN Hexokinase-2 OS=Homo sapiens OX=9606 GN=HK2 PE=1 SV=2	0	657	0	1497100	1052	0.000654846	0	627	0	1	1	1	2.3	102.38	917	0.0060449	6.4315	1497100	0			810
H0YAI6;D6RA22;D6RH33;D6R9E7;D6RB94;B4DK73;B4DHS8;D6RBY6;D6RE66;H0YAA3;Q9HAD4	WD repeat-containing protein 41	WDR41	tr|H0YAI6|H0YAI6_HUMAN WD repeat-containing protein 41 (Fragment) OS=Homo sapiens OX=9606 GN=WDR41 PE=1 SV=1;tr|D6RA22|D6RA22_HUMAN WD repeat-containing protein 41 OS=Homo sapiens OX=9606 GN=WDR41 PE=1 SV=1;tr|D6RH33|D6RH33_HUMAN WD repeat-containing prote	0	657	0	1481000	1053	0.000647804	0	627	0	11	1	1	15	6.8046	60	0.0060606	6.4422	1481000	0			190
Q9UHB9	Signal recognition particle subunit SRP68	SRP68	sp|Q9UHB9|SRP68_HUMAN Signal recognition particle subunit SRP68 OS=Homo sapiens OX=9606 GN=SRP68 PE=1 SV=2	0	657	0	1472500	1054	0.000644086	0	627	0	1	2	2	3.7	70.729	627	0.0010256	11.602	1472500	2			1202
G3V126;Q9UI12	V-type proton ATPase subunit H	ATP6V1H	tr|G3V126|G3V126_HUMAN V-type proton ATPase subunit H OS=Homo sapiens OX=9606 GN=ATP6V1H PE=1 SV=1;sp|Q9UI12|VATH_HUMAN V-type proton ATPase subunit H OS=Homo sapiens OX=9606 GN=ATP6V1H PE=1 SV=1	0	657	0	1455500	1055	0.00063665	0	627	0	2	1	1	5.2	51.57	443	0.0084459	6.2973	1455500	2			347
[truncated: 195 more rows]

## Sheet: in-gel ABV5811
Protein IDs	Protein names	Gene names	Gene name	Fasta headers	Intensity ABV5811	Rank	% Intensity	Number of proteins	Peptides	Unique peptides	Sequence coverage [%]	Mol. weight [kDa]	Sequence length	Fraction average	Q-value	Score	MS/MS count	Only identified by site	Potential contaminant	id
[truncated: 1,846 more rows]
