# Supplementary material for: Process- and product-related impurities in the ChAdOx1 nCov-19 vaccine
Source: eLife journal article supplement (doi:10.7554/elife.78513), 2022-07-04
Supplement: supp [file elife-78513-supp-v1.zip › elife_poa_e78513_Figure_3_source_data_1.xlsx]

## Sheet: in-sol JJ XD955
Protein IDs	Protein names	Gene names	Fasta headers	species	Number of proteins	Peptides	Unique peptides	Sequence coverage [%]	Mol. weight [kDa]	Sequence length	Q-value	Score	Sequence coverage JJ XD955 in sol [%]	Intensity	Intensity JJ XD955 in sol	Intensity %	MS/MS count	Only identified by site	Potential contaminant	id
CON__P00761		Trypsin		con	1	1	1	6.5	24.409	231	0	13.114	6.5	41600000	41600000	0.136733	2		+	15
CON__P04264;P04264;CON__Q6IFZ6;CON__Q9R0H5;CON__Q6NXH9;CON__Q7Z794;Q7Z794	Keratin, type II cytoskeletal 1	KRT1	;sp|P04264|K2C1_HUMAN Keratin, type II cytoskeletal 1 OS=Homo sapiens OX=9606 GN=KRT1 PE=1 SV=6	Homo sapiens	7	20	13	41	66.017	644	0	323.31	41	160140000	160140000	0.526357	40		+	17
CON__P13645;P13645;CON__P02535-1;CON__Q7Z3Z0;CON__Q7Z3Y8;CON__Q148H6;CON__Q7Z3Y7;CON__Q2M2I5;Q7Z3Z0;Q7Z3Y8;Q7Z3Y7;Q2M2I5	Keratin, type I cytoskeletal 10	KRT10	;sp|P13645|K1C10_HUMAN Keratin, type I cytoskeletal 10 OS=Homo sapiens OX=9606 GN=KRT10 PE=1 SV=6	Homo sapiens	12	16	15	40	59.51	593	0	323.31	40	55881000	55881000	0.183673	32		+	18
CON__P35527;P35527;K7EQQ3	Keratin, type I cytoskeletal 9	KRT9	;sp|P35527|K1C9_HUMAN Keratin, type I cytoskeletal 9 OS=Homo sapiens OX=9606 GN=KRT9 PE=1 SV=3;tr|K7EQQ3|K7EQQ3_HUMAN Keratin, type I cytoskeletal 9 OS=Homo sapiens OX=9606 GN=KRT9 PE=1 SV=1	Homo sapiens	3	15	15	38.8	62.129	623	0	310.73	38.8	53281000	53281000	0.175127	29		+	20
A0A0U1RR32;A0A0U1RRH7;Q99878;Q96KK5;Q9BTM1;Q16777;Q93077;Q7L7L0;Q6FI13;P20671;P0C0S8;P04908;H0YFX9;C9J0D1;A0A494C189;A0A3B3IS11;Q71UI9;P0C0S5;Q96QV6;P16104;C9J386;Q8IUE6	Histone H2A type 1-J;Histone H2A type 1-H;Histone H2A.J;Histone H2A type 2-C;Histone H2A type 1-C;Histone H2A type 3;Histone H2A type 2-A;Histone H2A type 1-D;Histone H2A type 1;Histone H2A type 1-B/E;Histone H2A;Histone H2A.V;Histone H2A.Z;Histone H2A type 1-A;Histone H2AX	HIST1H2AJ;HIST1H2AH;H2AFJ;HIST2H2AC;HIST1H2AC;HIST3H2A;HIST2H2AA3;HIST1H2AD;HIST1H2AG;HIST1H2AB;H2AFV;H2AFZ;HIST1H2AA;H2AFX	tr|A0A0U1RR32|A0A0U1RR32_HUMAN Histone H2A OS=Homo sapiens OX=9606 GN=hCG_2039566 PE=3 SV=1;tr|A0A0U1RRH7|A0A0U1RRH7_HUMAN Histone H2A OS=Homo sapiens OX=9606 PE=3 SV=1;sp|Q99878|H2A1J_HUMAN Histone H2A type 1-J OS=Homo sapiens OX=9606 GN=H2AC14 PE=1 SV=3;	Homo sapiens	22	3	3	20.7	18.481	169	0	24.238	20.7	35027000	35027000	0.115129	3			5
CON__P35908v2;P35908;CON__P35908;H0YID6;CON__Q5XKE5;CON__P12035;CON__Q01546;Q5XKE5;P12035;Q01546	Keratin, type II cytoskeletal 2 epidermal	KRT2	;sp|P35908|K22E_HUMAN Keratin, type II cytoskeletal 2 epidermal OS=Homo sapiens OX=9606 GN=KRT2 PE=1 SV=2;	Homo sapiens	10	18	14	42.6	65.432	639	0	323.31	42.6	29302000	29302000	0.0963114	21		+	21
P62805	Histone H4	HIST1H4A	sp|P62805|H4_HUMAN Histone H4 OS=Homo sapiens OX=9606 GN=H4C1 PE=1 SV=2	Homo sapiens	1	2	2	21.4	11.367	103	0	54.449	21.4	17316000	17316000	0.0569151	3			64
P62241;Q5JR95	40S ribosomal protein S8	RPS8	sp|P62241|RS8_HUMAN 40S ribosomal protein S8 OS=Homo sapiens OX=9606 GN=RPS8 PE=1 SV=2;tr|Q5JR95|Q5JR95_HUMAN 40S ribosomal protein S8 OS=Homo sapiens OX=9606 GN=RPS8 PE=1 SV=1	Homo sapiens	2	5	5	31.7	24.205	208	0	71.436	31.7	13383000	13383000	0.043988	10			58
P16403;P10412;P16402;P22492;Q02539	Histone H1.2;Histone H1.4;Histone H1.3	HIST1H1C;HIST1H1E;HIST1H1D	sp|P16403|H12_HUMAN Histone H1.2 OS=Homo sapiens OX=9606 GN=H1-2 PE=1 SV=2;sp|P10412|H14_HUMAN Histone H1.4 OS=Homo sapiens OX=9606 GN=H1-4 PE=1 SV=2;sp|P16402|H13_HUMAN Histone H1.3 OS=Homo sapiens OX=9606 GN=H1-3 PE=1 SV=2	Homo sapiens	5	4	4	15.5	21.364	213	0	28.347	15.5	9877900	9877900	0.0324672	5			54
P62979;J3QS39;J3QTR3;F5H6Q2;F5GYU3;F5H2Z3;F5H265;B4DV12;F5H388;A0A2R8Y422;F5H747;F5GXK7;J3QKN0;Q5PY61;Q96C32;P62987;P0CG47;P0CG48;J3QSA3;F5GZ39;M0R1V7;M0R1M6;M0R2S1	Ubiquitin-40S ribosomal protein S27a;Ubiquitin;40S ribosomal protein S27a;Ubiquitin-60S ribosomal protein L40;Ubiquitin;60S ribosomal protein L40;Polyubiquitin-B;Ubiquitin;Polyubiquitin-C;Ubiquitin	RPS27A;UBB;UBC;UBA52	sp|P62979|RS27A_HUMAN Ubiquitin-40S ribosomal protein S27a OS=Homo sapiens OX=9606 GN=RPS27A PE=1 SV=2;tr|J3QS39|J3QS39_HUMAN Polyubiquitin-B (Fragment) OS=Homo sapiens OX=9606 GN=UBB PE=1 SV=1;tr|J3QTR3|J3QTR3_HUMAN Ubiquitin-40S ribosomal protein S27a (F	Homo sapiens	23	3	3	24.4	17.965	156	0	106.77	24.4	9661100	9661100	0.0317546	7			67
U3KQK0;Q99880;Q99879;Q99877;Q93079;Q5QNW6;P62807;P58876;P57053;O60814;Q8N257;Q16778;P33778;P23527;P06899	Histone H2B;Histone H2B type 1-L;Histone H2B type 1-M;Histone H2B type 1-N;Histone H2B type 1-H;Histone H2B type 2-F;Histone H2B type 1-C/E/F/G/I;Histone H2B type 1-D;Histone H2B type F-S;Histone H2B type 1-K;Histone H2B type 3-B;Histone H2B type 2-E;Histone H2B type 1-B;Histone H2B type 1-O;Histone H2B type 1-J	HIST1H2BN;HIST1H2BL;HIST1H2BM;HIST1H2BH;HIST2H2BF;HIST1H2BC;HIST1H2BD;H2BFS;HIST1H2BK;HIST3H2BB;HIST2H2BE;HIST1H2BB;HIST1H2BO;HIST1H2BJ	tr|U3KQK0|U3KQK0_HUMAN Histone H2B OS=Homo sapiens OX=9606 GN=H2BC15 PE=1 SV=1;sp|Q99880|H2B1L_HUMAN Histone H2B type 1-L OS=Homo sapiens OX=9606 GN=H2BC13 PE=1 SV=3;sp|Q99879|H2B1M_HUMAN Histone H2B type 1-M OS=Homo sapiens OX=9606 GN=H2BC14 PE=1 SV=3;sp|	Homo sapiens	15	2	2	15.1	18.804	166	0	25.502	15.1	8198000	8198000	0.0269456	4			50
E9PJD9;E9PLL6;P46776	60S ribosomal protein L27a	RPL27A	tr|E9PJD9|E9PJD9_HUMAN 60S ribosomal protein L27a OS=Homo sapiens OX=9606 GN=RPL27A PE=1 SV=1;tr|E9PLL6|E9PLL6_HUMAN 60S ribosomal protein L27a OS=Homo sapiens OX=9606 GN=RPL27A PE=1 SV=1;sp|P46776|RL27A_HUMAN 60S ribosomal protein L27a OS=Homo sapiens OX=	Homo sapiens	3	2	2	24.2	10.127	91	0	15.783	24.2	6865400	6865400	0.0225656	4			25
Q9Y3U8;J3QSB5;J3KTD3	60S ribosomal protein L36	RPL36	sp|Q9Y3U8|RL36_HUMAN 60S ribosomal protein L36 OS=Homo sapiens OX=9606 GN=RPL36 PE=1 SV=3;tr|J3QSB5|J3QSB5_HUMAN 60S ribosomal protein L36 OS=Homo sapiens OX=9606 GN=RPL36 PE=1 SV=1	Homo sapiens	3	3	3	28.6	12.254	105	0	18.169	28.6	6861000	6861000	0.0225511	4			75
Q5VVC8;P62913	60S ribosomal protein L11	RPL11	tr|Q5VVC8|Q5VVC8_HUMAN 60S ribosomal protein L11 OS=Homo sapiens OX=9606 GN=RPL11 PE=1 SV=2;sp|P62913|RL11_HUMAN 60S ribosomal protein L11 OS=Homo sapiens OX=9606 GN=RPL11 PE=1 SV=2	Homo sapiens	2	2	2	13.8	19.024	167	0	170.97	13.8	6407000	6407000	0.0210589	3			65
G3V203;H0YHA7;J3QQ67;Q07020;F8VUA6;F8VYV2;A0A075B7A0	60S ribosomal protein L18	RPL18	tr|G3V203|G3V203_HUMAN 60S ribosomal protein L18 OS=Homo sapiens OX=9606 GN=RPL18 PE=1 SV=1;tr|H0YHA7|H0YHA7_HUMAN 60S ribosomal protein L18 (Fragment) OS=Homo sapiens OX=9606 GN=RPL18 PE=1 SV=1;tr|J3QQ67|J3QQ67_HUMAN 60S ribosomal protein L18 (Fragment) O	Homo sapiens	7	3	3	22.6	18.756	164	0	82.355	22.6	5530500	5530500	0.0181779	3			27
M0R3D6;M0R1A7;M0R117;Q02543;M0R0P7	60S ribosomal protein L18a	RPL18A	tr|M0R3D6|M0R3D6_HUMAN 60S ribosomal protein L18a (Fragment) OS=Homo sapiens OX=9606 GN=RPL18A PE=1 SV=1;tr|M0R1A7|M0R1A7_HUMAN 60S ribosomal protein L18a OS=Homo sapiens OX=9606 GN=RPL18A PE=1 SV=1;tr|M0R117|M0R117_HUMAN 60S ribosomal protein L18a OS=Homo	Homo sapiens	5	5	5	37.6	16.714	141	0	91.774	37.6	5337100	5337100	0.0175423	6			48
CON__P02533;P02533;CON__Q61782;CON__Q6IFX2;CON__P19012;CON__P08779;P19012;P08779;A0A3B3IS58;A8MT21;F5GWP8;CON__P35900;CON__Q9D312;CON__Q04695;CON__Q9QWL7;CON__A2A4G1;CON__Q9Z2K1;CON__Q3ZAW8;P35900;Q04695;CON__Q8N1A0;CON__P08727;CON__P19001;Q8N1A0;P08727	Keratin, type I cytoskeletal 14;Keratin, type I cytoskeletal 15;Keratin, type I cytoskeletal 16	KRT14;KRT15;KRT16	;sp|P02533|K1C14_HUMAN Keratin, type I cytoskeletal 14 OS=Homo sapiens OX=9606 GN=KRT14 PE=1 SV=4;;;;;sp|P19012|K1C15_HUMAN Keratin, type I cytoskeletal 15 OS=Homo sapiens OX=9606 GN=KRT15 PE=1 SV=3;sp|P08779|K1C16_HUMAN Keratin, type I cytoskeletal 16 OS=	Homo sapiens	25	5	2	12.7	51.621	472	0	117.05	12.7	3497100	3497100	0.0114945	6		+	16
Q5JU21;Q5JU20;Q5JU23;Q05932	Folylpolyglutamate synthase, mitochondrial	FPGS	tr|Q5JU21|Q5JU21_HUMAN Folylpoly-gamma-glutamate synthetase (Fragment) OS=Homo sapiens OX=9606 GN=FPGS PE=1 SV=1;tr|Q5JU20|Q5JU20_HUMAN Folylpoly-gamma-glutamate synthetase (Fragment) OS=Homo sapiens OX=9606 GN=FPGS PE=1 SV=8;tr|Q5JU23|Q5JU23_HUMAN Folylpo	Homo sapiens	4	1	1	8.2	21.59	194	1	-2	8.2	3300800	3300800	0.0108492	1	+		69
P62753;A2A3R7;A2A3R5	40S ribosomal protein S6	RPS6	sp|P62753|RS6_HUMAN 40S ribosomal protein S6 OS=Homo sapiens OX=9606 GN=RPS6 PE=1 SV=1;tr|A2A3R7|A2A3R7_HUMAN 40S ribosomal protein S6 OS=Homo sapiens OX=9606 GN=RPS6 PE=1 SV=1;tr|A2A3R5|A2A3R5_HUMAN 40S ribosomal protein S6 OS=Homo sapiens OX=9606 GN=RPS6	Homo sapiens	3	3	3	17.7	28.68	249	0	323.31	17.7	2822600	2822600	0.00927747	5			63
P62937;F8WE65;C9J5S7	Peptidyl-prolyl cis-trans isomerase A;Peptidyl-prolyl cis-trans isomerase A, N-terminally processed;Peptidyl-prolyl cis-trans isomerase	PPIA	sp|P62937|PPIA_HUMAN Peptidyl-prolyl cis-trans isomerase A OS=Homo sapiens OX=9606 GN=PPIA PE=1 SV=2;tr|F8WE65|F8WE65_HUMAN Peptidyl-prolyl cis-trans isomerase OS=Homo sapiens OX=9606 GN=PPIA PE=1 SV=1;tr|C9J5S7|C9J5S7_HUMAN Peptidyl-prolyl cis-trans isome	Homo sapiens	3	4	4	33.9	18.012	165	0	45.603	33.9	2654000	2654000	0.00872331	6			66
CON__P13647;P13647;F8W0C6;CON__P48668;CON__P04259;CON__P02538;P48668;P02538;F8VV57;H0YI76;CON__H-INV:HIT000016045;F8VP67;H0YIN9;F8VUG2;F8W1U3;CON__REFSEQ:XP_932229;CON__P05787;CON__P07744;CON__Q8VED5;CON__O95678;P05787;O95678	Keratin, type II cytoskeletal 5	KRT5	;sp|P13647|K2C5_HUMAN Keratin, type II cytoskeletal 5 OS=Homo sapiens OX=9606 GN=KRT5 PE=1 SV=3	Homo sapiens	22	7	2	14.9	62.378	590	0	139.69	14.9	2426700	2426700	0.00797621	7		+	19
P62266;D6RD47	40S ribosomal protein S23	RPS23	sp|P62266|RS23_HUMAN 40S ribosomal protein S23 OS=Homo sapiens OX=9606 GN=RPS23 PE=1 SV=3;tr|D6RD47|D6RD47_HUMAN 40S ribosomal protein S23 OS=Homo sapiens OX=9606 GN=RPS23 PE=1 SV=1	Homo sapiens	2	3	3	34.3	15.807	143	0	48.212	34.3	2180100	2180100	0.00716567	5			60
E7EPB3;P50914	60S ribosomal protein L14	RPL14	tr|E7EPB3|E7EPB3_HUMAN 60S ribosomal protein L14 OS=Homo sapiens OX=9606 GN=RPL14 PE=1 SV=1;sp|P50914|RL14_HUMAN 60S ribosomal protein L14 OS=Homo sapiens OX=9606 GN=RPL14 PE=1 SV=4	Homo sapiens	2	3	3	27.4	14.558	124	0	37.222	27.4	2150500	2150500	0.00706838	3			23
K7EK07;P84243;K7EMV3;K7EP01;A0A590UJJ6;B4DEB1;Q5TEC6;K7ES00;Q6NXT2;Q71DI3;Q16695;P68431	Histone H3;Histone H3.3;Histone H3.3C;Histone H3.2;Histone H3.1t;Histone H3.1	H3F3B;H3F3A;HIST2H3PS2;H3F3C;HIST2H3A;HIST3H3;HIST1H3A	tr|K7EK07|K7EK07_HUMAN Histone H3 (Fragment) OS=Homo sapiens OX=9606 GN=H3-3B PE=1 SV=1;sp|P84243|H33_HUMAN Histone H3.3 OS=Homo sapiens OX=9606 GN=H3-3A PE=1 SV=2;tr|K7EMV3|K7EMV3_HUMAN Histone H3 OS=Homo sapiens OX=9606 GN=H3-3B PE=1 SV=1;tr|K7EP01|K7EP0	Homo sapiens	12	2	2	29.5	14.914	132	0	13.397	29.5	2142400	2142400	0.00704175	2			31
P40429;Q8J015;M0QYS1;Q6NVV1;M0QZU1;A0A096LPE0	60S ribosomal protein L13a;Putative 60S ribosomal protein L13a protein RPL13AP3	RPL13A;RPL13a;RPL13AP3	sp|P40429|RL13A_HUMAN 60S ribosomal protein L13a OS=Homo sapiens OX=9606 GN=RPL13A PE=1 SV=2;tr|Q8J015|Q8J015_HUMAN 60S ribosomal protein L13a OS=Homo sapiens OX=9606 GN=RPL13A PE=1 SV=1;tr|M0QYS1|M0QYS1_HUMAN 60S ribosomal protein L13a (Fragment) OS=Homo	Homo sapiens	6	3	3	14.8	23.577	203	0	27.368	14.8	1844000	1844000	0.00606096	4			56
P07737;CON__P02584;K7EJ44;I3L3D5	Profilin-1	PFN1	sp|P07737|PROF1_HUMAN Profilin-1 OS=Homo sapiens OX=9606 GN=PFN1 PE=1 SV=2;	Homo sapiens	4	3	3	36.4	15.054	140	0	53.827	36.4	1719300	1719300	0.00565109	3		+	52
Q5T7C4;P09429;B2RPK0	High mobility group protein B1	HMGB1	tr|Q5T7C4|Q5T7C4_HUMAN High mobility group protein B1 OS=Homo sapiens OX=9606 GN=HMGB1 PE=1 SV=1;sp|P09429|HMGB1_HUMAN High mobility group protein B1 OS=Homo sapiens OX=9606 GN=HMGB1 PE=1 SV=3	Homo sapiens	3	3	3	29.7	18.311	158	0	17.386	29.7	1628700	1628700	0.0053533	2			53
J3KTA4;A0A1X7SBZ2;A0A5H1ZRQ2;P17844;Q92841;A0A0U1RQJ0;J3KRZ1;J3QRQ7	Probable ATP-dependent RNA helicase DDX5;Probable ATP-dependent RNA helicase DDX17	DDX5;DDX17	tr|J3KTA4|J3KTA4_HUMAN DEAD box protein 5 OS=Homo sapiens OX=9606 GN=DDX5 PE=1 SV=1;tr|A0A1X7SBZ2|A0A1X7SBZ2_HUMAN RNA helicase OS=Homo sapiens OX=9606 GN=DDX17 PE=1 SV=1;tr|A0A5H1ZRQ2|A0A5H1ZRQ2_HUMAN RNA helicase OS=Homo sapiens OX=9606 GN=DDX17 PE=1 SV=	Homo sapiens	8	2	2	4.1	69.086	614	0	17.08	4.1	1517600	1517600	0.00498813	2			6
O75531	Barrier-to-autointegration factor;Barrier-to-autointegration factor, N-terminally processed	BANF1	sp|O75531|BAF_HUMAN Barrier-to-autointegration factor OS=Homo sapiens OX=9606 GN=BANF1 PE=1 SV=1	Homo sapiens	1	1	1	13.5	10.058	89	0	23.872	13.5	1406700	1406700	0.00462362	2			51
F5H1D6;Q07864	DNA polymerase;DNA polymerase epsilon catalytic subunit A	POLE	tr|F5H1D6|F5H1D6_HUMAN DNA polymerase epsilon catalytic subunit OS=Homo sapiens OX=9606 GN=POLE PE=1 SV=1;sp|Q07864|DPOE1_HUMAN DNA polymerase epsilon catalytic subunit A OS=Homo sapiens OX=9606 GN=POLE PE=1 SV=5	Homo sapiens	2	1	1	0.7	258.35	2259	1	-2	0.7	1198500	1198500	0.00393929	1	+		26
Q5T749	Keratinocyte proline-rich protein	KPRP	sp|Q5T749|KPRP_HUMAN Keratinocyte proline-rich protein OS=Homo sapiens OX=9606 GN=KPRP PE=1 SV=1	Homo sapiens	1	2	2	5.4	64.135	579	0	14.976	5.4	1159600	1159600	0.00381143	3			71
P62258;K7EIT4;K7EM20;B7Z2E6;H0YB80;P27348;Q04917;P31946;P61981;P31947	14-3-3 protein epsilon;14-3-3 protein theta;14-3-3 protein eta;14-3-3 protein beta/alpha;14-3-3 protein beta/alpha, N-terminally processed;14-3-3 protein gamma;14-3-3 protein gamma, N-terminally processed;14-3-3 protein sigma	YWHAE;YWHAZ;YWHAQ;YWHAH;YWHAB;YWHAG;SFN	sp|P62258|1433E_HUMAN 14-3-3 protein epsilon OS=Homo sapiens OX=9606 GN=YWHAE PE=1 SV=1;tr|K7EIT4|K7EIT4_HUMAN 14-3-3 protein epsilon (Fragment) OS=Homo sapiens OX=9606 GN=YWHAE PE=1 SV=1;tr|K7EM20|K7EM20_HUMAN 14-3-3 protein epsilon (Fragment) OS=Homo sap	Homo sapiens	10	2	1	8.6	29.174	255	0	52.247	8.6	1029600	1029600	0.00338414	2			59
A0A087WVQ9;Q5VTE0;P68104;A6PW80;Q5JR01;A0A087WV01;A0A2U3TZH3;Q05639;A0A6Q8PFK6;A0A2R8YDN5;A0A2R8Y660;A0A2R8Y488	Putative elongation factor 1-alpha-like 3;Elongation factor 1-alpha 1;Elongation factor 1-alpha;Elongation factor 1-alpha 2	EEF1A1;EEF1A1P5;EEF1A2	tr|A0A087WVQ9|A0A087WVQ9_HUMAN Elongation factor 1-alpha 1 OS=Homo sapiens OX=9606 GN=EEF1A1 PE=1 SV=1;sp|Q5VTE0|EF1A3_HUMAN Putative elongation factor 1-alpha-like 3 OS=Homo sapiens OX=9606 GN=EEF1A1P5 PE=5 SV=1;sp|P68104|EF1A1_HUMAN Elongation factor 1-a	Homo sapiens	12	3	3	8.6	47.883	441	0	31.076	8.6	1003700	1003700	0.00329901	3			1
K7ELC7;P61353	60S ribosomal protein L27	RPL27	tr|K7ELC7|K7ELC7_HUMAN 60S ribosomal protein L27 (Fragment) OS=Homo sapiens OX=9606 GN=RPL27 PE=1 SV=1;sp|P61353|RL27_HUMAN 60S ribosomal protein L27 OS=Homo sapiens OX=9606 GN=RPL27 PE=1 SV=2	Homo sapiens	2	2	2	13.9	16.359	144	0	13.553	13.9	1002600	1002600	0.0032954	2			32
C9JXB8;C9JNW5;P83731	60S ribosomal protein L24	RPL24	tr|C9JXB8|C9JXB8_HUMAN 60S ribosomal protein L24 OS=Homo sapiens OX=9606 GN=RPL24 PE=1 SV=1;tr|C9JNW5|C9JNW5_HUMAN 60S ribosomal protein L24 OS=Homo sapiens OX=9606 GN=RPL24 PE=1 SV=1;sp|P83731|RL24_HUMAN 60S ribosomal protein L24 OS=Homo sapiens OX=9606 G	Homo sapiens	3	2	2	14	14.369	121	0	19.512	14	977790	977790	0.00321385	2			14
P62269;J3JS69;A0A0G2JQH2;Q5GGW2	40S ribosomal protein S18	RPS18	sp|P62269|RS18_HUMAN 40S ribosomal protein S18 OS=Homo sapiens OX=9606 GN=RPS18 PE=1 SV=3;tr|J3JS69|J3JS69_HUMAN 40S ribosomal protein S18 OS=Homo sapiens OX=9606 GN=RPS18 PE=1 SV=1	Homo sapiens	4	4	4	25	17.718	152	0	90.036	25	952830	952830	0.00313181	5			61
J3QSB4;P26373;H3BTH3	60S ribosomal protein L13	RPL13	tr|J3QSB4|J3QSB4_HUMAN 60S ribosomal protein L13 (Fragment) OS=Homo sapiens OX=9606 GN=RPL13 PE=1 SV=1;sp|P26373|RL13_HUMAN 60S ribosomal protein L13 OS=Homo sapiens OX=9606 GN=RPL13 PE=1 SV=4;tr|H3BTH3|H3BTH3_HUMAN 60S ribosomal protein L13 OS=Homo sapien	Homo sapiens	3	2	2	14.3	14.692	126	0	13.938	14.3	902750	902750	0.00296721	2			29
A0A3B3ITT5;P47914	60S ribosomal protein L29	RPL29	tr|A0A3B3ITT5|A0A3B3ITT5_HUMAN 60S ribosomal protein L29 OS=Homo sapiens OX=9606 GN=RPL29 PE=1 SV=1;sp|P47914|RL29_HUMAN 60S ribosomal protein L29 OS=Homo sapiens OX=9606 GN=RPL29 PE=1 SV=2	Homo sapiens	2	1	1	9	18.512	167	0	14.395	9	889160	889160	0.00292254	2			8
CON__Q86YZ3;Q86YZ3	Hornerin	HRNR	;sp|Q86YZ3|HORN_HUMAN Hornerin OS=Homo sapiens OX=9606 GN=HRNR PE=1 SV=2	Homo sapiens	2	2	2	3.6	282.39	2850	0	41.129	3.6	814030	814030	0.0026756	4		+	22
G2XKQ0;B8ZZN6;P63165;B8ZZJ0;B8ZZ67;B9A032	Small ubiquitin-related modifier;Small ubiquitin-related modifier 1	SUMO1	sp|G2XKQ0|SUMO5_HUMAN Small ubiquitin-related modifier 5 OS=Homo sapiens OX=9606 GN=SUMO1P1 PE=1 SV=2;tr|B8ZZN6|B8ZZN6_HUMAN Small ubiquitin-related modifier 1 OS=Homo sapiens OX=9606 GN=SUMO1 PE=1 SV=1;sp|P63165|SUMO1_HUMAN Small ubiquitin-related modifie	Homo sapiens	6	2	2	18.8	11.526	101	0	16.465	18.8	787570	787570	0.00258863	3			13
Q5T8U3;P62424;Q5T8U2	60S ribosomal protein L7a	RPL7A	tr|Q5T8U3|Q5T8U3_HUMAN 60S ribosomal protein L7a (Fragment) OS=Homo sapiens OX=9606 GN=RPL7A PE=1 SV=1;sp|P62424|RL7A_HUMAN 60S ribosomal protein L7a OS=Homo sapiens OX=9606 GN=RPL7A PE=1 SV=2;tr|Q5T8U2|Q5T8U2_HUMAN 60S ribosomal protein L7a OS=Homo sapien	Homo sapiens	3	2	2	12.6	21.545	191	0	48.549	12.6	746510	746510	0.00245367	3			62
Q02878	60S ribosomal protein L6	RPL6	sp|Q02878|RL6_HUMAN 60S ribosomal protein L6 OS=Homo sapiens OX=9606 GN=RPL6 PE=1 SV=3	Homo sapiens	1	2	2	8.7	32.728	288	0	32.97	8.7	591520	591520	0.00194424	3			68
A0A6Q8PFE4;E7EVS6;P63261;P60709;I3L3I0;I3L1U9;I3L4N8;A6NL76;A0A2R8Y793;P68133;P68032;A0A2R8YFE2;C9JUM1;C9JZR7;G5E9R0;K7EM38;A0A6Q8PH58;A0A2R8YEA7;I3L3R2;A0A2R8YGF8;J3KT65;Q9BYX7;P63267;P62736;P0CG39;Q6S8J3;P0CG38;A5A3E0	Actin, cytoplasmic 2;Actin, cytoplasmic 2, N-terminally processed;Actin, cytoplasmic 1;Actin, cytoplasmic 1, N-terminally processed;Actin, alpha skeletal muscle;Actin, alpha cardiac muscle 1	ACTB;ACTG1;ACTA1;ACTC1	tr|A0A6Q8PFE4|A0A6Q8PFE4_HUMAN Actin, cytoplasmic 1 OS=Homo sapiens OX=9606 GN=ACTB PE=1 SV=1;tr|E7EVS6|E7EVS6_HUMAN Actin, cytoplasmic 1 OS=Homo sapiens OX=9606 GN=ACTB PE=1 SV=9;sp|P63261|ACTG_HUMAN Actin, cytoplasmic 2 OS=Homo sapiens OX=9606 GN=ACTG1 P	Homo sapiens	28	3	3	9.6	37.34	332	0	52.038	9.6	582170	582170	0.00191351	2			10
A0A0G2JIW1;P0DMV9;P0DMV8;V9GZ37;Q53FA3;P34931	Heat shock 70 kDa protein 1B;Heat shock 70 kDa protein 1A	HSPA1B;HSPA1A	tr|A0A0G2JIW1|A0A0G2JIW1_HUMAN Heat shock 70 kDa protein 1B OS=Homo sapiens OX=9606 GN=HSPA1B PE=1 SV=1;sp|P0DMV9|HS71B_HUMAN Heat shock 70 kDa protein 1B OS=Homo sapiens OX=9606 GN=HSPA1B PE=1 SV=1;sp|P0DMV8|HS71A_HUMAN Heat shock 70 kDa protein 1A OS=Hom	Homo sapiens	6	3	3	5.6	70.108	642	0	27.974	5.6	571130	571130	0.00187722	3			3
H0YBG7;H0YBD7;H0YB39;E9PCY7;G8JLB6;P31943;P52597	Heterogeneous nuclear ribonucleoprotein H;Heterogeneous nuclear ribonucleoprotein H, N-terminally processed;Heterogeneous nuclear ribonucleoprotein F;Heterogeneous nuclear ribonucleoprotein F, N-terminally processed	HNRNPH1;HNRNPF	tr|H0YBG7|H0YBG7_HUMAN Heterogeneous nuclear ribonucleoprotein H (Fragment) OS=Homo sapiens OX=9606 GN=HNRNPH1 PE=1 SV=1;tr|H0YBD7|H0YBD7_HUMAN Heterogeneous nuclear ribonucleoprotein H (Fragment) OS=Homo sapiens OX=9606 GN=HNRNPH1 PE=1 SV=8;tr|H0YB39|H0YB	Homo sapiens	7	2	2	20.5	19.761	185	0	45.657	20.5	505180	505180	0.00166045	3			24
P12004	Proliferating cell nuclear antigen	PCNA	sp|P12004|PCNA_HUMAN Proliferating cell nuclear antigen OS=Homo sapiens OX=9606 GN=PCNA PE=1 SV=1	Homo sapiens	1	1	1	5	28.768	261	0	68.532	5	436690	436690	0.00143534	1			55
E7ETK0;A0A2R8Y849;A0A2R8YD14;P62847	40S ribosomal protein S24	RPS24	tr|E7ETK0|E7ETK0_HUMAN 40S ribosomal protein S24 OS=Homo sapiens OX=9606 GN=RPS24 PE=1 SV=1;tr|A0A2R8Y849|A0A2R8Y849_HUMAN 40S ribosomal protein S24 OS=Homo sapiens OX=9606 GN=RPS24 PE=1 SV=1;tr|A0A2R8YD14|A0A2R8YD14_HUMAN 40S ribosomal protein S24 OS=Homo	Homo sapiens	4	1	1	9.2	15.197	131	0	14.286	9.2	433870	433870	0.00142607	2			7
M0R3H0;M0R210;Q6IPX4;P62249;M0QX76;M0R1M5	40S ribosomal protein S16	RPS16	tr|M0R3H0|M0R3H0_HUMAN 40S ribosomal protein S16 OS=Homo sapiens OX=9606 GN=RPS16 PE=1 SV=1;tr|M0R210|M0R210_HUMAN 40S ribosomal protein S16 OS=Homo sapiens OX=9606 GN=RPS16 PE=1 SV=1;tr|Q6IPX4|Q6IPX4_HUMAN 40S ribosomal protein S16 OS=Homo sapiens OX=9606	Homo sapiens	6	2	2	21	11.075	100	0	16.619	21	404490	404490	0.0013295	2			49
Q5T6W2;P61978	Heterogeneous nuclear ribonucleoprotein K	HNRNPK	tr|Q5T6W2|Q5T6W2_HUMAN Heterogeneous nuclear ribonucleoprotein K (Fragment) OS=Homo sapiens OX=9606 GN=HNRNPK PE=1 SV=1;sp|P61978|HNRPK_HUMAN Heterogeneous nuclear ribonucleoprotein K OS=Homo sapiens OX=9606 GN=HNRNPK PE=1 SV=1	Homo sapiens	2	1	1	4.5	41.807	379	0	14.911	4.5	377270	377270	0.00124003	1			57
K7EJB5		SNRPD2	tr|K7EJB5|K7EJB5_HUMAN Small nuclear ribonucleoprotein Sm D2 OS=Homo sapiens OX=9606 GN=SNRPD2 PE=1 SV=1	Homo sapiens	1	1	1	27.8	6.1443	54	1	-2	27.8	372040	372040	0.00122284	1	+		30
H3BTL6;B7Z896;F5H3M2;Q9BVG8	Kinesin-like protein;Kinesin-like protein KIFC3	KIFC3	tr|H3BTL6|H3BTL6_HUMAN Kinesin-like protein (Fragment) OS=Homo sapiens OX=9606 GN=KIFC3 PE=1 SV=1;tr|B7Z896|B7Z896_HUMAN Kinesin-like protein OS=Homo sapiens OX=9606 GN=KIFC3 PE=1 SV=1;tr|F5H3M2|F5H3M2_HUMAN Kinesin-like protein OS=Homo sapiens OX=9606 GN=	Homo sapiens	4	1	1	4.3	30.662	280	1	-2	4.3	325550	325550	0.00107003	1	+		12
Q6DKI1;R4GMU7	60S ribosomal protein L7-like 1	RPL7L1	sp|Q6DKI1|RL7L_HUMAN 60S ribosomal protein L7-like 1 OS=Homo sapiens OX=9606 GN=RPL7L1 PE=1 SV=2;tr|R4GMU7|R4GMU7_HUMAN 60S ribosomal protein L7-like 1 (Fragment) OS=Homo sapiens OX=9606 GN=RPL7L1 PE=1 SV=2	Homo sapiens	2	3	3	15.7	29.669	255	0	41.803	15.7	253410	253410	0.000832921	4			72
E9PHW9;A0A5F9ZI30;A0A5F9ZGY4;A0A5F9ZHF7;A0A5F9ZHT4;A0A5F9ZGZ5;A0A5F9ZI65;A0A5F9ZI46;A0A5F9ZHT8;A0A5F9ZH19;A0A5F9ZHN5;A0A5F9ZI40;I6L894;A0A5F9ZGY3;A0A5F9ZHD2;A0A5F9ZHR8;D6RHE1;A0A5F9ZHE4;A0A5F9ZGX3;A0A5F9ZHS1;A0A5F9ZH30;Q01484	Ankyrin-2	ANK2	tr|E9PHW9|E9PHW9_HUMAN Ankyrin-2 (Fragment) OS=Homo sapiens OX=9606 GN=ANK2 PE=1 SV=1;tr|A0A5F9ZI30|A0A5F9ZI30_HUMAN Ankyrin-2 OS=Homo sapiens OX=9606 GN=ANK2 PE=1 SV=1;tr|A0A5F9ZGY4|A0A5F9ZGY4_HUMAN Ankyrin-2 OS=Homo sapiens OX=9606 GN=ANK2 PE=1 SV=1;tr|A	Homo sapiens	22	1	1	0.7	189.1	1730	1	-2	0.7	250020	250020	0.000821779	1	+		9
Q15233;C9IZL7;H7C367;C9JYS8	Non-POU domain-containing octamer-binding protein	NONO	sp|Q15233|NONO_HUMAN Non-POU domain-containing octamer-binding protein OS=Homo sapiens OX=9606 GN=NONO PE=1 SV=4;tr|C9IZL7|C9IZL7_HUMAN Non-POU domain-containing octamer-binding protein (Fragment) OS=Homo sapiens OX=9606 GN=NONO PE=1 SV=1;tr|H7C367|H7C367_	Homo sapiens	4	2	2	7.2	54.231	471	0	13.975	7.2	147630	147630	0.000485238	3			70
A0A087WUI2;P22626	Heterogeneous nuclear ribonucleoproteins A2/B1	HNRNPA2B1	tr|A0A087WUI2|A0A087WUI2_HUMAN Heterogeneous nuclear ribonucleoproteins A2/B1 OS=Homo sapiens OX=9606 GN=HNRNPA2B1 PE=1 SV=1;sp|P22626|ROA2_HUMAN Heterogeneous nuclear ribonucleoproteins A2/B1 OS=Homo sapiens OX=9606 GN=HNRNPA2B1 PE=1 SV=2	Homo sapiens	2	1	1	3.8	29.836	261	0	12.931	3.8	0	0	0	1			0
A0A087X1B6		AR	tr|A0A087X1B6|A0A087X1B6_HUMAN Androgen receptor OS=Homo sapiens OX=9606 GN=AR PE=1 SV=1	Homo sapiens	1	1	1	2.7	79.421	737	1	-2	2.7	0	0	0	1	+		2
A0A0U1RQC7;D6REC4	Cilia- and flagella-associated protein 99	CFAP99	tr|A0A0U1RQC7|A0A0U1RQC7_HUMAN Cilia- and flagella-associated protein 99 OS=Homo sapiens OX=9606 GN=CFAP99 PE=1 SV=1;sp|D6REC4|CFA99_HUMAN Cilia- and flagella-associated protein 99 OS=Homo sapiens OX=9606 GN=CFAP99 PE=3 SV=1	Homo sapiens	2	1	1	1.8	81.885	714	1	-2	1.8	0	0	0	1	+		4
H3BM27		CALML4	tr|H3BM27|H3BM27_HUMAN Calmodulin-like protein 4 (Fragment) OS=Homo sapiens OX=9606 GN=CALML4 PE=4 SV=1	Homo sapiens	1	1	1	51.7	3.1555	29	1	-2	51.7	0	0	0	1	+		28
K7EM35		ESRRG	tr|K7EM35|K7EM35_HUMAN Estrogen-related receptor gamma OS=Homo sapiens OX=9606 GN=ESRRG PE=4 SV=1	Homo sapiens	1	1	1	36.2	5.249	47	1	-2	36.2	0	0	0	1	+		33
Q92688	Acidic leucine-rich nuclear phosphoprotein 32 family member B	ANP32B	sp|Q92688|AN32B_HUMAN Acidic leucine-rich nuclear phosphoprotein 32 family member B OS=Homo sapiens OX=9606 GN=ANP32B PE=1 SV=1	Homo sapiens	1	1	1	4.4	28.787	251	0	16.837	4.4	0	0	0	1			73
Q9BQS8	FYVE and coiled-coil domain-containing protein 1	FYCO1	sp|Q9BQS8|FYCO1_HUMAN FYVE and coiled-coil domain-containing protein 1 OS=Homo sapiens OX=9606 GN=FYCO1 PE=1 SV=3	Homo sapiens	1	1	1	0.8	166.98	1478	1	-2	0.8	0	0	0	1	+		74
ASQ41649.1		TetR	ASQ41649.1 tetracycline repressor TetR [synthetic construct]	host cell protein	1	2	2	15.1	24.459	218	0	38.791	15.1	2863900	2863900	0.00941322	2			11
lcl|EF153474.1_prot_ABO61316.1_10		hexon	lcl|EF153474.1_prot_ABO61316.1_10 [protein=hexon] [protein_id=ABO61316.1] [location=17755..20643] [gbkey=CDS]	JJ_human Adenovirus 26	1	55	55	76.9	108.31	962	0	323.31	76.9	7064400000	7064400000	23.2196	341			43
lcl|EF153474.1_prot_ABO61315.1_9		VI	lcl|EF153474.1_prot_ABO61315.1_9 [protein=pVI] [protein_id=ABO61315.1] [location=17010..17714] [gbkey=CDS]	JJ_human Adenovirus 26	1	16	16	72.6	25.515	234	0	323.31	72.6	5279500000	5279500000	17.3529	154			42
lcl|EF153474.1_prot_ABO61313.1_7		VII	lcl|EF153474.1_prot_ABO61313.1_7 [protein=pVII] [protein_id=ABO61313.1] [location=15076..15663] [gbkey=CDS]	JJ_human Adenovirus 26	1	9	9	34.9	21.647	195	0	310.64	34.9	5127200000	5127200000	16.8524	112			40
lcl|EF153474.1_prot_ABO61314.1_8		V	lcl|EF153474.1_prot_ABO61314.1_8 [protein=pV] [protein_id=ABO61314.1] [location=15696..16700] [gbkey=CDS]	JJ_human Adenovirus 26	1	25	25	62.9	38.058	334	0	323.31	62.9	3601600000	3601600000	11.8379	165			41
lcl|EF153474.1_prot_ABO61311.1_5		IIIa	lcl|EF153474.1_prot_ABO61311.1_5 [protein=pIIIa] [protein_id=ABO61311.1] [location=11778..13460] [gbkey=CDS]	JJ_human Adenovirus 26	1	26	26	63.6	62.138	560	0	323.31	63.6	2296900000	2296900000	7.54957	129			38
lcl|EF153474.1_prot_ABO61310.1_4		52/55K	lcl|EF153474.1_prot_ABO61310.1_4 [protein=52/55K] [protein_id=ABO61310.1] [location=10634..11755] [gbkey=CDS]	JJ_human Adenovirus 26	1	15	15	55.2	42.116	373	0	323.31	55.2	2254000000	2254000000	7.40857	65			37
lcl|EF153474.1_prot_ABO61312.1_6		penton	lcl|EF153474.1_prot_ABO61312.1_6 [protein=penton] [protein_id=ABO61312.1] [location=13512..15071] [gbkey=CDS]	JJ_human Adenovirus 26	1	24	24	64.4	58.587	519	0	323.31	64.4	1576700000	1576700000	5.18238	84			39
lcl|EF153474.1_prot_ABO61320.1_14		VIII	lcl|EF153474.1_prot_ABO61320.1_14 [protein=pVIII] [protein_id=ABO61320.1] [location=25528..26211] [gbkey=CDS]	JJ_human Adenovirus 26	1	9	9	74	24.613	227	0	323.31	74	1427400000	1427400000	4.69165	53			46
lcl|EF153474.1_prot_ABO61307.1_1		IX	lcl|EF153474.1_prot_ABO61307.1_1 [protein=pIX] [protein_id=ABO61307.1] [location=3450..3854] [gbkey=CDS]	JJ_human Adenovirus 26	1	7	7	94	13.792	134	0	323.31	94	741950000	741950000	2.43868	89			34
lcl|EF153474.1_prot_ABO61321.1_15		fiber	lcl|EF153474.1_prot_ABO61321.1_15 [protein=fiber] [protein_id=ABO61321.1] [location=30962..32086] [gbkey=CDS]	JJ_human Adenovirus 26	1	14	14	57.8	40.998	374	0	323.31	57.8	380120000	380120000	1.2494	38			47
lcl|EF153474.1_prot_ABO61317.1_11		protease	lcl|EF153474.1_prot_ABO61317.1_11 [protein=protease] [protein_id=ABO61317.1] [location=20646..21275] [gbkey=CDS]	JJ_human Adenovirus 26	1	8	8	38.8	23.588	209	0	92.354	38.8	103420000	103420000	0.339926	13			44
lcl|EF153474.1_prot_ABO61309.1_3		TP	lcl|EF153474.1_prot_ABO61309.1_3 [protein=pTP] [protein_id=ABO61309.1] [location=complement(8321..10174)] [gbkey=CDS]	JJ_human Adenovirus 26	1	16	16	37.3	71.142	617	0	278.88	37.3	53163000	53163000	0.174739	26			36
lcl|EF153474.1_prot_ABO61319.1_13		100K	lcl|EF153474.1_prot_ABO61319.1_13 [protein=100K] [protein_id=ABO61319.1] [location=22805..25000] [gbkey=CDS]	JJ_human Adenovirus 26	1	6	6	12.9	82.085	731	0	44.291	12.9	4348100	4348100	0.0142916	7			45
lcl|EF153474.1_prot_ABO61308.1_2		DNA polymerase	lcl|EF153474.1_prot_ABO61308.1_2 [protein=DNA polymerase] [protein_id=ABO61308.1] [location=complement(5001..8276)] [gbkey=CDS]	JJ_human Adenovirus 26	1	1	1	1.3	125.45	1091	0	42.486	1.3	0	0	0	1			35

## Sheet: in sol JJ 21C 10-01, XE395
Protein IDs	Protein names	Gene names	Fasta headers	species	Number of proteins	Peptides	Unique peptides	Sequence coverage [%]	Mol. weight [kDa]	Sequence length	Q-value	Score	Intensity	Intensity JJ 21C 10-01	Int % JJ 21C 10-01	Intensity JJ XE 395	Int % JJ XE 395	MS/MS count	Only identified by site	Potential contaminant	id
lcl|EF153474.1_prot_ABO61313.1_7[protein=pVII][protein_id=ABO61313.1][location=15076..15663][gbkey=CDS]		VII	lcl|EF153474.1_prot_ABO61313.1_7 [protein=pVII] [protein_id=ABO61313.1] [location=15076..15663] [gbkey=CDS]	JJ_human Adenovirus 26	1	9	9	44.6	21.647	195	0	323.31	16560000000	7146000000	19.0144	5101100000	23.4474	440			93
lcl|EF153474.1_prot_ABO61316.1_10[protein=hexon][protein_id=ABO61316.1][location=17755..20643][gbkey=CDS]		hexon	lcl|EF153474.1_prot_ABO61316.1_10 [protein=hexon] [protein_id=ABO61316.1] [location=17755..20643] [gbkey=CDS]	JJ_human Adenovirus 26	1	61	61	79	108.31	962	0	323.31	13697000000	855310000	2.27585	3198300000	14.7011	343			96
lcl|EF153474.1_prot_ABO61315.1_9[protein=pVI][protein_id=ABO61315.1][location=17010..17714][gbkey=CDS]		VI	lcl|EF153474.1_prot_ABO61315.1_9 [protein=pVI] [protein_id=ABO61315.1] [location=17010..17714] [gbkey=CDS]	JJ_human Adenovirus 26	1	22	22	91.5	25.515	234	0	323.31	12326000000	3773500000	10.0407	3272400000	15.0417	251			95
lcl|EF153474.1_prot_ABO61314.1_8[protein=pV][protein_id=ABO61314.1][location=15696..16700][gbkey=CDS]		V	lcl|EF153474.1_prot_ABO61314.1_8 [protein=pV] [protein_id=ABO61314.1] [location=15696..16700] [gbkey=CDS]	JJ_human Adenovirus 26	1	25	25	68.3	38.058	334	0	323.31	10144000000	4908500000	13.0608	2659800000	12.2259	226			94
lcl|EF153474.1_prot_ABO61311.1_5[protein=pIIIa][protein_id=ABO61311.1][location=11778..13460][gbkey=CDS]		IIIa	lcl|EF153474.1_prot_ABO61311.1_5 [protein=pIIIa] [protein_id=ABO61311.1] [location=11778..13460] [gbkey=CDS]	JJ_human Adenovirus 26	1	25	25	63.8	62.138	560	0	323.31	8460100000	3247600000	8.64137	2331700000	10.7177	236			91
lcl|EF153474.1_prot_ABO61312.1_6[protein=penton][protein_id=ABO61312.1][location=13512..15071][gbkey=CDS]		penton	lcl|EF153474.1_prot_ABO61312.1_6 [protein=penton] [protein_id=ABO61312.1] [location=13512..15071] [gbkey=CDS]	JJ_human Adenovirus 26	1	37	37	85	58.587	519	0	323.31	7389000000	4282900000	11.3961	1955600000	8.98898	189			92
lcl|EF153474.1_prot_ABO61320.1_14[protein=pVIII][protein_id=ABO61320.1][location=25528..26211][gbkey=CDS]		VIII	lcl|EF153474.1_prot_ABO61320.1_14 [protein=pVIII] [protein_id=ABO61320.1] [location=25528..26211] [gbkey=CDS]	JJ_human Adenovirus 26	1	11	11	86.3	24.613	227	0	323.31	4043300000	1904400000	5.06732	778570000	3.57872	95			99
lcl|EF153474.1_prot_ABO61310.1_4[protein=52/55K][protein_id=ABO61310.1][location=10634..11755][gbkey=CDS]		52/55k	lcl|EF153474.1_prot_ABO61310.1_4 [protein=52/55K] [protein_id=ABO61310.1] [location=10634..11755] [gbkey=CDS]	JJ_human Adenovirus 26	1	14	14	55.2	42.116	373	0	323.31	2691400000	537120000	1.42919	463570000	2.13081	86			90
lcl|EF153474.1_prot_ABO61307.1_1[protein=pIX][protein_id=ABO61307.1][location=3450..3854][gbkey=CDS]		IX	lcl|EF153474.1_prot_ABO61307.1_1 [protein=pIX] [protein_id=ABO61307.1] [location=3450..3854] [gbkey=CDS]	JJ_human Adenovirus 26	1	9	9	94	13.792	134	0	323.31	2435500000	453680000	1.20717	470470000	2.16253	230			87
lcl|EF153474.1_prot_ABO61321.1_15[protein=fiber][protein_id=ABO61321.1][location=30962..32086][gbkey=CDS]		fiber	lcl|EF153474.1_prot_ABO61321.1_15 [protein=fiber] [protein_id=ABO61321.1] [location=30962..32086] [gbkey=CDS]	JJ_human Adenovirus 26	1	19	19	70.3	40.998	374	0	323.31	673840000	30361000	0.080786	212380000	0.976212	61			100
lcl|EF153474.1_prot_ABO61317.1_11[protein=protease][protein_id=ABO61317.1][location=20646..21275][gbkey=CDS]		protease	lcl|EF153474.1_prot_ABO61317.1_11 [protein=protease] [protein_id=ABO61317.1] [location=20646..21275] [gbkey=CDS]	JJ_human Adenovirus 26	1	9	9	38.8	23.588	209	0	160.64	641640000	427030000	1.13626	139380000	0.640665	22			97
lcl|EF153474.1_prot_ABO61309.1_3[protein=pTP][protein_id=ABO61309.1][location=complement(8321..10174)][gbkey=CDS]		TP	lcl|EF153474.1_prot_ABO61309.1_3 [protein=pTP] [protein_id=ABO61309.1] [location=complement(8321..10174)] [gbkey=CDS]	JJ_human Adenovirus 26	1	23	23	51.5	71.142	617	0	210.97	127160000	57234000	0.152291	40392000	0.185663	42			89
lcl|EF153474.1_prot_ABO61319.1_13[protein=100K][protein_id=ABO61319.1][location=22805..25000][gbkey=CDS]		100K	lcl|EF153474.1_prot_ABO61319.1_13 [protein=100K] [protein_id=ABO61319.1] [location=22805..25000] [gbkey=CDS]	JJ_human Adenovirus 26	1	3	3	7	82.085	731	0	2.4205	3254400	0	0	0	0	2			98
lcl|EF153474.1_prot_ABO61308.1_2[protein=DNApolymerase][protein_id=ABO61308.1][location=complement(5001..8276)][gbkey=CDS]		DNA polymerase	lcl|EF153474.1_prot_ABO61308.1_2 [protein=DNA polymerase] [protein_id=ABO61308.1] [location=complement(5001..8276)] [gbkey=CDS]	JJ_human Adenovirus 26	1	1	1	1.3	125.45	1091	0	1.3357	0	0	0	0	0	1			88
CON__P04264;P04264;CON__H-INV:HIT000016045;F8VP67;CON__H-INV:HIT000292931	Keratin, type II cytoskeletal 1	KRT1	;sp|P04264|K2C1_HUMAN Keratin, type II cytoskeletal 1 OS=Homo sapiens OX=9606 GN=KRT1 PE=1 SV=6	con_Homo sapiens	5	26	17	48.9	66.017	644	0	323.31	2648900000	2534300000	6.74339	2782800	0.0127912	83		+	50
CON__P00761		Trypsin	>sp|P00761|TRYP_PIG Trypsin OS=Sus scrofa OX=9823 PE=1 SV=1	con	1	2	2	10	24.409	231	0	81.795	1880900000	1840800000	4.89809	1567900	0.0072069	6		+	47
CON__P13645;P13645;CON__P02535-1;CON__P05784;CON__Q148H6;CON__Q7Z3Y7;CON__Q2M2I5;Q7Z3Y7;Q2M2I5;A0A3B3ITG2;F8VZY9;CON__Q14525;CON__Q9UE12;CON__Q15323;CON__A2A5Y0;CON__Q92764;C4AM86;CON__Q14532;CON__Q7Z3Z0;CON__A2AB72;CON__Q497I4;CON__O76015;CON__Q7Z3Y8;CON__O76013;CON__O76014;CON__REFSEQ:XP_986630;CON__Q99456;Q14525;Q15323;P05783;Q14532;O76014;Q7Z3Z0;Q92764;O76015;Q7Z3Y8;O76013;Q99456	Keratin, type I cytoskeletal 10	KRT10	;sp|P13645|K1C10_HUMAN Keratin, type I cytoskeletal 10 OS=Homo sapiens OX=9606 GN=KRT10 PE=1 SV=6	con_Homo sapiens	38	27	24	56.3	59.51	593	0	323.31	1688300000	1636700000	4.35501	1669300	0.00767299	78		+	51
CON__P35527;P35527;K7EQQ3	Keratin, type I cytoskeletal 9	KRT9	;sp|P35527|K1C9_HUMAN Keratin, type I cytoskeletal 9 OS=Homo sapiens OX=9606 GN=KRT9 PE=1 SV=3;tr|K7EQQ3|K7EQQ3_HUMAN Keratin, type I cytoskeletal 9 OS=Homo sapiens OX=9606 GN=KRT9 PE=1 SV=1	con_Homo sapiens	3	24	23	55.4	62.129	623	0	323.31	1615600000	1559100000	4.14853	5714500	0.0262669	88		+	53
CON__P35908v2;P35908;CON__P35908;Q01546;CON__Q01546;CON__O95678;CON__P12035;O95678;P12035;CON__P07744;CON__Q6NXH9;H0YID6;CON__Q9R0H5;CON__Q7Z794;CON__P19013;P19013;Q7Z794;H0YHD9;F8VS61;H0YIC5;CON__REFSEQ:XP_932229;CON__Q9DCV7;CON__Q3KNV1;CON__P08729;CON__Q9NSB2;CON__Q6ISB0;P08729;Q9NSB2;P12036	Keratin, type II cytoskeletal 2 epidermal	KRT2	;sp|P35908|K22E_HUMAN Keratin, type II cytoskeletal 2 epidermal OS=Homo sapiens OX=9606 GN=KRT2 PE=1 SV=2;	con_Homo sapiens	29	27	16	55.2	65.432	639	0	323.31	1304200000	1259300000	3.35081	1043900	0.00479832	60		+	54
P61956;A8MUA9;A8MU27;Q6EEV6;P55854	Small ubiquitin-related modifier 2;Small ubiquitin-related modifier 4;Small ubiquitin-related modifier 3	SUMO2;SUMO3;SUMO4	sp|P61956|SUMO2_HUMAN Small ubiquitin-related modifier 2 OS=Homo sapiens OX=9606 GN=SUMO2 PE=1 SV=3;tr|A8MUA9|A8MUA9_HUMAN SMT3 suppressor of mif two 3 homolog 3 (Yeast), isoform CRA_d OS=Homo sapiens OX=9606 GN=SUMO3 PE=1 SV=1;tr|A8MU27|A8MU27_HUMAN Small	Homo sapiens	5	2	2	23.2	10.871	95	0	52.036	404840000	60347000	0.160574	336130000	1.54503	6			120
C9JJE5;C9JLU6;C9J4N6;O75874	Isocitrate dehydrogenase [NADP] cytoplasmic	IDH1	tr|C9JJE5|C9JJE5_HUMAN Isocitrate dehydrogenase [NADP] cytoplasmic (Fragment) OS=Homo sapiens OX=9606 GN=IDH1 PE=1 SV=1;tr|C9JLU6|C9JLU6_HUMAN Isocitrate dehydrogenase [NADP] cytoplasmic (Fragment) OS=Homo sapiens OX=9606 GN=IDH1 PE=1 SV=8;tr|C9J4N6|C9J4N6	Homo sapiens	4	1	1	30.6	7.0719	62	0.0084034	0.77512	216750000	0	0	216750000	0.996298	1			42
Q9Y2A7	Nck-associated protein 1	NCKAP1	sp|Q9Y2A7|NCKP1_HUMAN Nck-associated protein 1 OS=Homo sapiens OX=9606 GN=NCKAP1 PE=1 SV=1	Homo sapiens	1	1	1	0.8	128.79	1128	0.0098039	0.88866	208210000	64387000	0.171324	100100000	0.460113	3			162
A0A075B6H4;Q9H8E8	Cysteine-rich protein 2-binding protein	CSRP2BP	tr|A0A075B6H4|A0A075B6H4_HUMAN Cysteine-rich protein 2-binding protein OS=Homo sapiens OX=9606 GN=KAT14 PE=1 SV=1;sp|Q9H8E8|CSR2B_HUMAN Cysteine-rich protein 2-binding protein OS=Homo sapiens OX=9606 GN=KAT14 PE=1 SV=3	Homo sapiens	2	1	1	1	88.772	781	0.009434	0.87616	189950000	0	0	189950000	0.873111	1			0
Q96FX7	tRNA (adenine(58)-N(1))-methyltransferase catalytic subunit TRMT61A	TRMT61A	sp|Q96FX7|TRM61_HUMAN tRNA (adenine(58)-N(1))-methyltransferase catalytic subunit TRMT61A OS=Homo sapiens OX=9606 GN=TRMT61A PE=1 SV=1	Homo sapiens	1	1	1	7.3	31.381	289	0	1.989	102710000	98220000	0.261349	4490100	0.0206389	8			150
CON__P41361			>sp|P41361|ANT3_BOVIN Antithrombin-III OS=Bos taurus OX=9913 GN=SERPINC1 PE=1 SV=2	con	1	1	1	3.9	52.347	465	0.0091743	0.86354	75131000	75131000	0.199912	0	0	5		+	55
CON__P02533;P02533;CON__Q9QWL7;CON__Q6IFX2;CON__P08779;P08779;C9JM50;CON__P08727;CON__Q04695;CON__P19012;P08727;Q04695;P19012;K7EPJ9;F5GWP8;CON__P19001;CON__A2A4G1;K7EMS3;CON__Q9Z2K1;CON__Q3ZAW8;CON__Q61782;K7ESE1;K7ENW6;C9JTG5;A8MT21	Keratin, type I cytoskeletal 14	KRT14	;sp|P02533|K1C14_HUMAN Keratin, type I cytoskeletal 14 OS=Homo sapiens OX=9606 GN=KRT14 PE=1 SV=4	con_Homo sapiens	25	13	10	37.5	51.621	472	0	323.31	72764000	70060000	0.186419	0	0	21		+	48
CON__P13647;P13647;H0YI76;F8W0C6;H0YIN9;CON__Q8VED5;F8VUG2;F8W1U3;CON__P05787;CON__Q9H552;P05787;F8VV57	Keratin, type II cytoskeletal 5	KRT5	;sp|P13647|K2C5_HUMAN Keratin, type II cytoskeletal 5 OS=Homo sapiens OX=9606 GN=KRT5 PE=1 SV=3;tr|H0YI76|H0YI76_HUMAN Keratin, type II cytoskeletal 5 (Fragment) OS=Homo sapiens OX=9606 GN=KRT5 PE=1 SV=1	con_Homo sapiens	12	12	2	22	62.378	590	0	311.76	71445000	69272000	0.184322	901230	0.00414253	15		+	52
Q9NR99	Matrix-remodeling-associated protein 5	MXRA5	sp|Q9NR99|MXRA5_HUMAN Matrix-remodeling-associated protein 5 OS=Homo sapiens OX=9606 GN=MXRA5 PE=1 SV=3	Homo sapiens	1	1	1	0.7	312.15	2828	1	-2	71160000	71160000	0.189346	0	0	1	+		160
Q8TBA6	Golgin subfamily A member 5	GOLGA5	sp|Q8TBA6|GOGA5_HUMAN Golgin subfamily A member 5 OS=Homo sapiens OX=9606 GN=GOLGA5 PE=1 SV=3	Homo sapiens	1	1	1	1.6	83.023	731	0.0084746	0.77537	70217000	70217000	0.186837	0	0	0			147
A0A3B3ITT5;P47914	60S ribosomal protein L29	RPL29	tr|A0A3B3ITT5|A0A3B3ITT5_HUMAN 60S ribosomal protein L29 OS=Homo sapiens OX=9606 GN=RPL29 PE=1 SV=1;sp|P47914|RL29_HUMAN 60S ribosomal protein L29 OS=Homo sapiens OX=9606 GN=RPL29 PE=1 SV=2	Homo sapiens	2	2	2	13.8	18.512	167	0	9.4402	64339000	48741000	0.129692	14709000	0.0676104	5			26
CON__Q86YZ3;Q86YZ3	Hornerin	HRNR	;sp|Q86YZ3|HORN_HUMAN Hornerin OS=Homo sapiens OX=9606 GN=HRNR PE=1 SV=2	con_Homo sapiens	2	6	6	9.2	282.39	2850	0	37.773	61384000	60570000	0.161168	0	0	9		+	59
C9JJN9;Q8N3P4	Vacuolar protein sorting-associated protein 8 homolog	VPS8	tr|C9JJN9|C9JJN9_HUMAN Vacuolar protein sorting-associated protein 8 homolog OS=Homo sapiens OX=9606 GN=VPS8 PE=1 SV=1;sp|Q8N3P4|VPS8_HUMAN Vacuolar protein sorting-associated protein 8 homolog OS=Homo sapiens OX=9606 GN=VPS8 PE=1 SV=3	Homo sapiens	2	2	2	2.6	161.8	1428	0	1.5861	47787000	44827000	0.119278	2960100	0.0136062	4			46
P62805	Histone H4	HIST1H4A	sp|P62805|H4_HUMAN Histone H4 OS=Homo sapiens OX=9606 GN=H4C1 PE=1 SV=2	Homo sapiens	1	5	5	38.8	11.367	103	0	151.48	44859000	3178600	0.00845777	24365000	0.111995	8			128
D3DRR9;Q86WR7	Proline and serine-rich protein 2	C10orf47;PROSER2	tr|D3DRR9|D3DRR9_HUMAN Chromosome 10 open reading frame 47, isoform CRA_b OS=Homo sapiens OX=9606 GN=PROSER2 PE=1 SV=1;sp|Q86WR7|PRSR2_HUMAN Proline and serine-rich protein 2 OS=Homo sapiens OX=9606 GN=PROSER2 PE=1 SV=2	Homo sapiens	2	1	1	5.4	24.792	239	0	1.2643	43955000	43955000	0.116958	0	0	4			60
I3L520;Q9P225	Dynein heavy chain 2, axonemal	DNAH2	tr|I3L520|I3L520_HUMAN Dynein heavy chain 2, axonemal (Fragment) OS=Homo sapiens OX=9606 GN=DNAH2 PE=1 SV=8;sp|Q9P225|DYH2_HUMAN Dynein heavy chain 2, axonemal OS=Homo sapiens OX=9606 GN=DNAH2 PE=1 SV=3	Homo sapiens	2	1	1	1.2	132.71	1158	0.0093458	0.87314	42619000	42619000	0.113403	0	0	1			79
A0A0U1RQC7;D6REC4	Cilia- and flagella-associated protein 99	CFAP99	tr|A0A0U1RQC7|A0A0U1RQC7_HUMAN Cilia- and flagella-associated protein 99 OS=Homo sapiens OX=9606 GN=CFAP99 PE=1 SV=1;sp|D6REC4|CFA99_HUMAN Cilia- and flagella-associated protein 99 OS=Homo sapiens OX=9606 GN=CFAP99 PE=3 SV=1	Homo sapiens	2	1	1	1.8	81.885	714	1	-2	41428000	0	0	0	0	0	+		19
P16403;P10412;P16402	Histone H1.2;Histone H1.4;Histone H1.3	HIST1H1C;HIST1H1E;HIST1H1D	sp|P16403|H12_HUMAN Histone H1.2 OS=Homo sapiens OX=9606 GN=H1-2 PE=1 SV=2;sp|P10412|H14_HUMAN Histone H1.4 OS=Homo sapiens OX=9606 GN=H1-4 PE=1 SV=2;sp|P16402|H13_HUMAN Histone H1.3 OS=Homo sapiens OX=9606 GN=H1-3 PE=1 SV=2	Homo sapiens	3	2	2	9.9	21.364	213	0	4.0854	33856000	17215000	0.0458065	14825000	0.0681436	5			109
A0A0U1RR32;A0A0U1RRH7;Q99878;Q96KK5;Q9BTM1;Q16777;Q93077;Q7L7L0;Q6FI13;P20671;P0C0S8;P04908;H0YFX9;C9J0D1;A0A494C189;A0A3B3IS11;Q71UI9;P0C0S5;Q96QV6;P16104;C9J386;Q8IUE6	Histone H2A type 1-J;Histone H2A type 1-H;Histone H2A.J;Histone H2A type 2-C;Histone H2A type 1-C;Histone H2A type 3;Histone H2A type 2-A;Histone H2A type 1-D;Histone H2A type 1;Histone H2A type 1-B/E;Histone H2A;Histone H2A.V;Histone H2A.Z;Histone H2A type 1-A;Histone H2AX	HIST1H2AJ;HIST1H2AH;H2AFJ;HIST2H2AC;HIST1H2AC;HIST3H2A;HIST2H2AA3;HIST1H2AD;HIST1H2AG;HIST1H2AB;H2AFV;H2AFZ;HIST1H2AA;H2AFX	tr|A0A0U1RR32|A0A0U1RR32_HUMAN Histone H2A OS=Homo sapiens OX=9606 GN=hCG_2039566 PE=3 SV=1;tr|A0A0U1RRH7|A0A0U1RRH7_HUMAN Histone H2A OS=Homo sapiens OX=9606 PE=3 SV=1;sp|Q99878|H2A1J_HUMAN Histone H2A type 1-J OS=Homo sapiens OX=9606 GN=H2AC14 PE=1 SV=3;	Homo sapiens	22	3	3	20.7	18.481	169	0	23.52	33197000	13089000	0.0348278	18877000	0.0867687	10			21
D6RBU4;A0A087WZV0;O43314	Inositol hexakisphosphate and diphosphoinositol-pentakisphosphate kinase 2	PPIP5K2	tr|D6RBU4|D6RBU4_HUMAN Inositol hexakisphosphate and diphosphoinositol-pentakisphosphate kinase (Fragment) OS=Homo sapiens OX=9606 GN=PPIP5K2 PE=1 SV=1;tr|A0A087WZV0|A0A087WZV0_HUMAN Inositol hexakisphosphate and diphosphoinositol-pentakisphosphate kinase	Homo sapiens	3	1	1	1.8	51.208	452	1	-2	25138000	25138000	0.0668884	0	0	1	+		6
U3KQK0;Q99880;Q99879;Q99877;Q93079;Q8N257;Q5QNW6;Q16778;P62807;P58876;P57053;P33778;P23527;P06899;O60814;Q96A08	Histone H2B;Histone H2B type 1-L;Histone H2B type 1-M;Histone H2B type 1-N;Histone H2B type 1-H;Histone H2B type 3-B;Histone H2B type 2-F;Histone H2B type 2-E;Histone H2B type 1-C/E/F/G/I;Histone H2B type 1-D;Histone H2B type F-S;Histone H2B type 1-B;Histone H2B type 1-O;Histone H2B type 1-J;Histone H2B type 1-K;Histone H2B type 1-A	HIST1H2BN;HIST1H2BL;HIST1H2BM;HIST1H2BH;HIST3H2BB;HIST2H2BF;HIST2H2BE;HIST1H2BC;HIST1H2BD;H2BFS;HIST1H2BB;HIST1H2BO;HIST1H2BJ;HIST1H2BK;HIST1H2BA	tr|U3KQK0|U3KQK0_HUMAN Histone H2B OS=Homo sapiens OX=9606 GN=H2BC15 PE=1 SV=1;sp|Q99880|H2B1L_HUMAN Histone H2B type 1-L OS=Homo sapiens OX=9606 GN=H2BC13 PE=1 SV=3;sp|Q99879|H2B1M_HUMAN Histone H2B type 1-M OS=Homo sapiens OX=9606 GN=H2BC14 PE=1 SV=3;sp|	Homo sapiens	16	2	2	15.7	18.804	166	0	1.7072	22545000	4514400	0.0120121	11572000	0.0531911	5			103
P62979;J3QS39;J3QTR3;F5H6Q2;F5GYU3;F5H2Z3;F5H265;B4DV12;F5H388;A0A2R8Y422;F5H747;F5GXK7;J3QKN0;Q5PY61;Q96C32;P62987;P0CG47;P0CG48;J3QSA3;F5GZ39;M0R1V7;M0R1M6;M0R2S1	Ubiquitin-40S ribosomal protein S27a;Ubiquitin;40S ribosomal protein S27a;Ubiquitin-60S ribosomal protein L40;Ubiquitin;60S ribosomal protein L40;Polyubiquitin-B;Ubiquitin;Polyubiquitin-C;Ubiquitin	RPS27A;UBB;UBC;UBA52	sp|P62979|RS27A_HUMAN Ubiquitin-40S ribosomal protein S27a OS=Homo sapiens OX=9606 GN=RPS27A PE=1 SV=2;tr|J3QS39|J3QS39_HUMAN Polyubiquitin-B (Fragment) OS=Homo sapiens OX=9606 GN=UBB PE=1 SV=1;tr|J3QTR3|J3QTR3_HUMAN Ubiquitin-40S ribosomal protein S27a (F	Homo sapiens	23	3	3	24.4	17.965	156	0	221.3	21812000	10132000	0.0269597	4015800	0.0184588	11			131
H0YLZ5;H0YKX6;H0YMY9;E5RHT7		MOK	tr|H0YLZ5|H0YLZ5_HUMAN MAPK/MAK/MRK overlapping kinase OS=Homo sapiens OX=9606 GN=MOK PE=4 SV=1;tr|H0YKX6|H0YKX6_HUMAN MAPK/MAK/MRK overlapping kinase OS=Homo sapiens OX=9606 GN=MOK PE=4 SV=1;tr|H0YMY9|H0YMY9_HUMAN MAPK/MAK/MRK overlapping kinase (Fragment	Homo sapiens	4	1	1	23.4	5.3451	47	0.008547	0.82141	20050000	20050000	0.05335	0	0	0			64
P22674	Cyclin-O	CCNO	sp|P22674|CCNO_HUMAN Cyclin-O OS=Homo sapiens OX=9606 GN=CCNO PE=1 SV=2	Homo sapiens	1	1	1	4.3	38.096	350	1	-2	19598000	19598000	0.0521473	0	0	1	+		115
E9PE96;Q9Y6V0	Protein piccolo	PCLO	tr|E9PE96|E9PE96_HUMAN Protein piccolo OS=Homo sapiens OX=9606 GN=PCLO PE=1 SV=1;sp|Q9Y6V0|PCLO_HUMAN Protein piccolo OS=Homo sapiens OX=9606 GN=PCLO PE=1 SV=5	Homo sapiens	2	1	1	1.1	136.39	1217	1	-2	19369000	0	0	19369000	0.0890302	0	+		68
A0A0H2UH41;A0A087X187;A0A087WTB9;Q6S5H5;A6NI47;Q6S545	POTE ankyrin domain family member G;Putative POTE ankyrin domain family member M;POTE ankyrin domain family member H	POTEG;POTEH;POTEM	tr|A0A0H2UH41|A0A0H2UH41_HUMAN Putative POTE ankyrin domain family member M OS=Homo sapiens OX=9606 GN=POTEM PE=4 SV=1;tr|A0A087X187|A0A087X187_HUMAN Putative POTE ankyrin domain family member M OS=Homo sapiens OX=9606 GN=POTEM PE=4 SV=1;tr|A0A087WTB9|A0A0	Homo sapiens	6	1	1	4.3	36.513	322	1	-2	19147000	0	0	19147000	0.0880098	1	+		2
P62241;Q5JR95	40S ribosomal protein S8	RPS8	sp|P62241|RS8_HUMAN 40S ribosomal protein S8 OS=Homo sapiens OX=9606 GN=RPS8 PE=1 SV=2;tr|Q5JR95|Q5JR95_HUMAN 40S ribosomal protein S8 OS=Homo sapiens OX=9606 GN=RPS8 PE=1 SV=1	Homo sapiens	2	5	5	31.7	24.205	208	0	323.31	18841000	8592000	0.022862	2517000	0.0115695	10			122
Q07065	Cytoskeleton-associated protein 4	CKAP4	sp|Q07065|CKAP4_HUMAN Cytoskeleton-associated protein 4 OS=Homo sapiens OX=9606 GN=CKAP4 PE=1 SV=2	Homo sapiens	1	1	1	3	66.022	602	0.009901	0.88955	17575000	3878500	0.0103201	11752000	0.0540185	4			137
A0A087X1N7;P20929	Nebulin	NEB	tr|A0A087X1N7|A0A087X1N7_HUMAN Nebulin OS=Homo sapiens OX=9606 GN=NEB PE=1 SV=1;sp|P20929|NEBU_HUMAN Nebulin OS=Homo sapiens OX=9606 GN=NEB PE=1 SV=5	Homo sapiens	2	1	1	0.1	990.84	8560	0.0083333	0.76575	16363000	0	0	16363000	0.0752131	1			11
A0A3B3ITY6			tr|A0A3B3ITY6|A0A3B3ITY6_HUMAN Calsyntenin-1 (Fragment) OS=Homo sapiens OX=9606 GN=CLSTN1 PE=1 SV=1	Homo sapiens	1	1	1	3.5	41.278	373	1	-2	14588000	14588000	0.0388165	0	0	0	+		27
Q5T749	Keratinocyte proline-rich protein	KPRP	sp|Q5T749|KPRP_HUMAN Keratinocyte proline-rich protein OS=Homo sapiens OX=9606 GN=KPRP PE=1 SV=1	Homo sapiens	1	4	4	9.7	64.135	579	0	149.9	13456000	12649000	0.0336571	0	0	5			143
E7EPB3;P50914	60S ribosomal protein L14	RPL14	tr|E7EPB3|E7EPB3_HUMAN 60S ribosomal protein L14 OS=Homo sapiens OX=9606 GN=RPL14 PE=1 SV=1;sp|P50914|RL14_HUMAN 60S ribosomal protein L14 OS=Homo sapiens OX=9606 GN=RPL14 PE=1 SV=4	Homo sapiens	2	4	4	36.3	14.558	124	0	31.379	11944000	1552000	0.00412964	8241900	0.0378842	6			66
K7EMA7;H7BY10;K7EJV9;K7ERT8;A8MUS3;P62750	60S ribosomal protein L23a	RPL23A	tr|K7EMA7|K7EMA7_HUMAN 60S ribosomal protein L23a OS=Homo sapiens OX=9606 GN=RPL23A PE=1 SV=1;tr|H7BY10|H7BY10_HUMAN 60S ribosomal protein L23a (Fragment) OS=Homo sapiens OX=9606 GN=RPL23A PE=1 SV=1;tr|K7EJV9|K7EJV9_HUMAN 60S ribosomal protein L23a (Fragme	Homo sapiens	6	2	2	27.1	7.9232	70	0	60.982	11928000	8678100	0.0230911	3249700	0.0149374	3			36
P10745	Retinol-binding protein 3	RBP3	sp|P10745|RET3_HUMAN Retinol-binding protein 3 OS=Homo sapiens OX=9606 GN=RBP3 PE=1 SV=2	Homo sapiens	1	1	1	1.8	135.36	1247	1	-2	11904000	11904000	0.0316747	0	0	1	+		110
Q13233	Mitogen-activated protein kinase kinase kinase 1	MAP3K1	sp|Q13233|M3K1_HUMAN Mitogen-activated protein kinase kinase kinase 1 OS=Homo sapiens OX=9606 GN=MAP3K1 PE=1 SV=4	Homo sapiens	1	1	1	0.9	164.47	1512	0	1.0591	11179000	0	0	11179000	0.0513846	0			139
G3V203;H0YHA7;J3QQ67;Q07020;F8VUA6;F8VYV2;A0A075B7A0	60S ribosomal protein L18	RPL18	tr|G3V203|G3V203_HUMAN 60S ribosomal protein L18 OS=Homo sapiens OX=9606 GN=RPL18 PE=1 SV=1;tr|H0YHA7|H0YHA7_HUMAN 60S ribosomal protein L18 (Fragment) OS=Homo sapiens OX=9606 GN=RPL18 PE=1 SV=1;tr|J3QQ67|J3QQ67_HUMAN 60S ribosomal protein L18 (Fragment) O	Homo sapiens	7	3	3	22.6	18.756	164	0	323.31	10659000	3141200	0.00835826	1987400	0.00913515	10			77
P15924	Desmoplakin	DSP	sp|P15924|DESP_HUMAN Desmoplakin OS=Homo sapiens OX=9606 GN=DSP PE=1 SV=3	Homo sapiens	1	7	7	3.4	331.77	2871	0	323.31	10641000	10641000	0.0283141	0	0	10			114
Q99459	Cell division cycle 5-like protein	CDC5L	sp|Q99459|CDC5L_HUMAN Cell division cycle 5-like protein OS=Homo sapiens OX=9606 GN=CDC5L PE=1 SV=2	Homo sapiens	1	1	1	2.7	92.25	802	1	-2	9670900	9670900	0.0257328	0	0	2	+		153
A0A0D9SF36		NRXN1	tr|A0A0D9SF36|A0A0D9SF36_HUMAN Neurexin-1-beta (Fragment) OS=Homo sapiens OX=9606 GN=NRXN1 PE=1 SV=4	Homo sapiens	1	1	1	4.7	23.023	213	0.0081967	0.76416	9556100	9556100	0.0254273	0	0	2			14
K7EK07;P84243;K7EMV3;K7EP01;A0A590UJJ6;B4DEB1;Q5TEC6;K7ES00;Q6NXT2;Q71DI3;Q16695;P68431	Histone H3;Histone H3.3;Histone H3.3C;Histone H3.2;Histone H3.1t;Histone H3.1	H3F3B;H3F3A;HIST2H3PS2;H3F3C;HIST2H3A;HIST3H3;HIST1H3A	tr|K7EK07|K7EK07_HUMAN Histone H3 (Fragment) OS=Homo sapiens OX=9606 GN=H3-3B PE=1 SV=1;sp|P84243|H33_HUMAN Histone H3.3 OS=Homo sapiens OX=9606 GN=H3-3A PE=1 SV=2;tr|K7EMV3|K7EMV3_HUMAN Histone H3 OS=Homo sapiens OX=9606 GN=H3-3B PE=1 SV=1;tr|K7EP01|K7EP0	Homo sapiens	12	2	2	29.5	14.914	132	0	5.5914	9408400	4970500	0.0132257	3836500	0.0176346	3			83
P62753;A2A3R7;A2A3R5	40S ribosomal protein S6	RPS6	sp|P62753|RS6_HUMAN 40S ribosomal protein S6 OS=Homo sapiens OX=9606 GN=RPS6 PE=1 SV=1;tr|A2A3R7|A2A3R7_HUMAN 40S ribosomal protein S6 OS=Homo sapiens OX=9606 GN=RPS6 PE=1 SV=1;tr|A2A3R5|A2A3R5_HUMAN 40S ribosomal protein S6 OS=Homo sapiens OX=9606 GN=RPS6	Homo sapiens	3	3	3	15.7	28.68	249	0	126.99	8777200	4891200	0.0130147	1657400	0.00761829	8			127
J3QSB5;Q9Y3U8	60S ribosomal protein L36	RPL36	tr|J3QSB5|J3QSB5_HUMAN 60S ribosomal protein L36 OS=Homo sapiens OX=9606 GN=RPL36 PE=1 SV=1;sp|Q9Y3U8|RL36_HUMAN 60S ribosomal protein L36 OS=Homo sapiens OX=9606 GN=RPL36 PE=1 SV=3	Homo sapiens	2	1	1	10.6	10.789	94	0	4.6169	8155300	5396800	0.0143601	2758500	0.0126795	2			81
P40429;M0QZU1;A0A096LPE0;Q8J015;M0QYS1;Q6NVV1	60S ribosomal protein L13a;Putative 60S ribosomal protein L13a protein RPL13AP3	RPL13A;RPL13a;RPL13AP3	sp|P40429|RL13A_HUMAN 60S ribosomal protein L13a OS=Homo sapiens OX=9606 GN=RPL13A PE=1 SV=2;tr|M0QZU1|M0QZU1_HUMAN 60S ribosomal protein L13a OS=Homo sapiens OX=9606 GN=RPL13A PE=1 SV=1;tr|A0A096LPE0|A0A096LPE0_HUMAN 60S ribosomal protein L13a OS=Homo sap	Homo sapiens	6	2	2	10.8	23.577	203	0	92.46	7900500	4112500	0.0109427	1943900	0.0089352	8			118
E9PJD9;E9PLL6;P46776;E9PLX7	60S ribosomal protein L27a	RPL27A	tr|E9PJD9|E9PJD9_HUMAN 60S ribosomal protein L27a OS=Homo sapiens OX=9606 GN=RPL27A PE=1 SV=1;tr|E9PLL6|E9PLL6_HUMAN 60S ribosomal protein L27a OS=Homo sapiens OX=9606 GN=RPL27A PE=1 SV=1;sp|P46776|RL27A_HUMAN 60S ribosomal protein L27a OS=Homo sapiens OX=	Homo sapiens	4	3	3	36.3	10.127	91	0	16.756	7417000	1350400	0.00359321	1543400	0.00709429	5			69
O60861	Growth arrest-specific protein 7	GAS7	sp|O60861|GAS7_HUMAN Growth arrest-specific protein 7 OS=Homo sapiens OX=9606 GN=GAS7 PE=1 SV=3	Homo sapiens	1	1	1	2.1	54.371	476	0	1.3123	7393200	0	0	7393200	0.0339831	0			104
M0R3D6;M0R1A7;M0R117;Q02543;M0R0P7	60S ribosomal protein L18a	RPL18A	tr|M0R3D6|M0R3D6_HUMAN 60S ribosomal protein L18a (Fragment) OS=Homo sapiens OX=9606 GN=RPL18A PE=1 SV=1;tr|M0R1A7|M0R1A7_HUMAN 60S ribosomal protein L18a OS=Homo sapiens OX=9606 GN=RPL18A PE=1 SV=1;tr|M0R117|M0R117_HUMAN 60S ribosomal protein L18a OS=Homo	Homo sapiens	5	3	3	25.5	16.714	141	0	9.3881	7101400	2456200	0.00653558	0	0	5			101
ASQ41649.1tetracyclinerepressorTetR[syntheticconstruct]		TetR	ASQ41649.1 tetracycline repressor TetR [synthetic construct]	host cell protein	1	2	2	15.1	24.459	218	0	226.89	7080100	3664600	0.00975095	1737700	0.0079874	8			37
Q9H6S0	Probable ATP-dependent RNA helicase YTHDC2	YTHDC2	sp|Q9H6S0|YTDC2_HUMAN 3-5 RNA helicase YTHDC2 OS=Homo sapiens OX=9606 GN=YTHDC2 PE=1 SV=2	Homo sapiens	1	1	1	0.6	160.25	1430	0.0095238	0.87979	6968300	4010800	0.0106721	2957500	0.0135942	2			158
Q5VVC8;P62913	60S ribosomal protein L11	RPL11	tr|Q5VVC8|Q5VVC8_HUMAN 60S ribosomal protein L11 OS=Homo sapiens OX=9606 GN=RPL11 PE=1 SV=2;sp|P62913|RL11_HUMAN 60S ribosomal protein L11 OS=Homo sapiens OX=9606 GN=RPL11 PE=1 SV=2	Homo sapiens	2	3	3	18.6	19.024	167	0	83.437	6407000	0	0	0	0	5			130
Q02878;F8VR69;F8VZ45;U3KQR5	60S ribosomal protein L6	RPL6	sp|Q02878|RL6_HUMAN 60S ribosomal protein L6 OS=Homo sapiens OX=9606 GN=RPL6 PE=1 SV=3	Homo sapiens	4	5	5	19.8	32.728	288	0	140.09	5820800	4417000	0.011753	812280	0.00373367	9			135
CON__Q5D862;Q5D862	Filaggrin-2	FLG2	;sp|Q5D862|FILA2_HUMAN Filaggrin-2 OS=Homo sapiens OX=9606 GN=FLG2 PE=1 SV=1	con_Homo sapiens	2	4	4	3.6	248.07	2391	0	80.537	5811700	5811700	0.0154641	0	0	4		+	57
F2Z388;P42766	60S ribosomal protein L35	RPL35	tr|F2Z388|F2Z388_HUMAN 60S ribosomal protein L35 OS=Homo sapiens OX=9606 GN=RPL35 PE=1 SV=1;sp|P42766|RL35_HUMAN 60S ribosomal protein L35 OS=Homo sapiens OX=9606 GN=RPL35 PE=1 SV=2	Homo sapiens	2	2	2	17.7	10.645	96	0	3.2165	5527600	0	0	5527600	0.0254078	1			72
Q15058	Kinesin-like protein KIF14	KIF14	sp|Q15058|KIF14_HUMAN Kinesin-like protein KIF14 OS=Homo sapiens OX=9606 GN=KIF14 PE=1 SV=1	Homo sapiens	1	1	1	0.7	186.49	1648	1	-2	5414200	0	0	5414200	0.0248865	1	+		140
A0A087WSY3;A6NG92;C9JT67;Q3MJ40;A2RUR9	Coiled-coil domain-containing protein 144B;Coiled-coil domain-containing protein 144A	CCDC144A;CCDC144B	tr|A0A087WSY3|A0A087WSY3_HUMAN Coiled-coil domain-containing protein 144A OS=Homo sapiens OX=9606 GN=CCDC144A PE=4 SV=1;tr|A6NG92|A6NG92_HUMAN CCDC144A protein OS=Homo sapiens OX=9606 GN=CCDC144A PE=2 SV=4;tr|C9JT67|C9JT67_HUMAN Coiled-coil domain-containi	Homo sapiens	5	1	1	2.8	82.883	725	1	-2	5330300	0	0	5330300	0.0245009	1	+		1
D6RC00		IRX4	tr|D6RC00|D6RC00_HUMAN Iroquois-class homeodomain protein IRX-4 OS=Homo sapiens OX=9606 GN=IRX4 PE=1 SV=1	Homo sapiens	1	1	1	12.2	20.61	196	1	-2	4806900	4806900	0.0127904	0	0	0	+		63
P62266;D6RD47	40S ribosomal protein S23	RPS23	sp|P62266|RS23_HUMAN 40S ribosomal protein S23 OS=Homo sapiens OX=9606 GN=RPS23 PE=1 SV=3;tr|D6RD47|D6RD47_HUMAN 40S ribosomal protein S23 OS=Homo sapiens OX=9606 GN=RPS23 PE=1 SV=1	Homo sapiens	2	2	2	26.6	15.807	143	0	93.942	4735600	1646800	0.00438189	908750	0.0041771	9			124
K7EMC7;Q8WWM9	Cytoglobin	CYGB	tr|K7EMC7|K7EMC7_HUMAN Cytoglobin OS=Homo sapiens OX=9606 GN=CYGB PE=1 SV=1;sp|Q8WWM9|CYGB_HUMAN Cytoglobin OS=Homo sapiens OX=9606 GN=CYGB PE=1 SV=1	Homo sapiens	2	1	1	5.3	24.993	226	1	-2	4626400	4626400	0.0123101	0	0	1	+		85
J3QTB1;Q86WV6	Stimulator of interferon genes protein	TMEM173	tr|J3QTB1|J3QTB1_HUMAN Stimulator of interferon genes protein OS=Homo sapiens OX=9606 GN=STING1 PE=1 SV=2;sp|Q86WV6|STING_HUMAN Stimulator of interferon genes protein OS=Homo sapiens OX=9606 GN=STING1 PE=1 SV=1	Homo sapiens	2	1	1	4.9	31.635	283	1	-2	4476800	4476800	0.0119121	0	0	1	+		82
Q9Y661	Heparan sulfate glucosamine 3-O-sulfotransferase 4	HS3ST4	sp|Q9Y661|HS3S4_HUMAN Heparan sulfate glucosamine 3-O-sulfotransferase 4 OS=Homo sapiens OX=9606 GN=HS3ST4 PE=2 SV=3	Homo sapiens	1	1	1	5	49.799	456	1	-2	4353500	4353500	0.011584	0	0	0	+		163
G3V164;P48058	Glutamate receptor 4	GRIA4	tr|G3V164|G3V164_HUMAN Glutamate receptor OS=Homo sapiens OX=9606 GN=GRIA4 PE=1 SV=1;sp|P48058|GRIA4_HUMAN Glutamate receptor 4 OS=Homo sapiens OX=9606 GN=GRIA4 PE=1 SV=2	Homo sapiens	2	1	1	1.6	99.249	884	1	-2	4070400	0	0	4070400	0.0187097	1	+		76
Q9HBG4	V-type proton ATPase 116 kDa subunit a isoform 4	ATP6V0A4	sp|Q9HBG4|VPP4_HUMAN V-type proton ATPase 116 kDa subunit a isoform 4 OS=Homo sapiens OX=9606 GN=ATP6V0A4 PE=1 SV=2	Homo sapiens	1	1	1	1.2	96.385	840	0	1.6515	4016000	0	0	4016000	0.0184597	0			159
P49207	60S ribosomal protein L34	RPL34	sp|P49207|RL34_HUMAN 60S ribosomal protein L34 OS=Homo sapiens OX=9606 GN=RPL34 PE=1 SV=3	Homo sapiens	1	1	1	6.8	13.293	117	0	2.6132	3789600	3789600	0.0100836	0	0	1			119
A0A087X0P0;Q02224	Kinesin-like protein;Centromere-associated protein E	CENPE	tr|A0A087X0P0|A0A087X0P0_HUMAN Centromere-associated protein E OS=Homo sapiens OX=9606 GN=CENPE PE=1 SV=1;sp|Q02224|CENPE_HUMAN Centromere-associated protein E OS=Homo sapiens OX=9606 GN=CENPE PE=1 SV=2	Homo sapiens	2	1	1	0.3	312.1	2664	0.0090909	0.85535	3742500	0	0	3742500	0.0172025	1			8
J3QL79;F8WD03;J3QQJ7;Q4G0P3	Hydrocephalus-inducing protein homolog	HYDIN	tr|J3QL79|J3QL79_HUMAN Hydrocephalus-inducing protein homolog (Fragment) OS=Homo sapiens OX=9606 GN=HYDIN PE=1 SV=1;tr|F8WD03|F8WD03_HUMAN Hydrocephalus-inducing protein homolog OS=Homo sapiens OX=9606 GN=HYDIN PE=1 SV=1;tr|J3QQJ7|J3QQJ7_HUMAN Hydrocephalu	Homo sapiens	4	1	1	3	59.465	528	0.009009	0.85152	3304400	3304400	0.00879251	0	0	1			75
Q5JU21;Q5JU20;Q5JU23;Q05932	Folylpolyglutamate synthase, mitochondrial	FPGS	tr|Q5JU21|Q5JU21_HUMAN Folylpoly-gamma-glutamate synthetase (Fragment) OS=Homo sapiens OX=9606 GN=FPGS PE=1 SV=1;tr|Q5JU20|Q5JU20_HUMAN Folylpoly-gamma-glutamate synthetase (Fragment) OS=Homo sapiens OX=9606 GN=FPGS PE=1 SV=8;tr|Q5JU23|Q5JU23_HUMAN Folylpo	Homo sapiens	4	1	1	8.2	21.59	194	1	-2	3300800	0	0	0	0	1	+		136
C9JDB3		DOCK4	tr|C9JDB3|C9JDB3_HUMAN Dedicator of cytokinesis protein 4 (Fragment) OS=Homo sapiens OX=9606 GN=DOCK4 PE=1 SV=1	Homo sapiens	1	1	1	9.2	15.357	131	0	0.99334	3281400	2162900	0.00575515	1118400	0.00514076	2			45
CON__Q7RTS7;CON__Q32MB2;F8W1S1;Q7RTS7;Q86Y46;CON__Q14CN4-1;CON__Q6IME9;CON__Q3SY84;Q14CN4;Q3SY84;H0YIG3	Keratin, type II cytoskeletal 74;Keratin, type II cytoskeletal 73;Keratin, type II cytoskeletal 72;Keratin, type II cytoskeletal 71	KRT74;KRT73;KRT72;KRT71	;;tr|F8W1S1|F8W1S1_HUMAN Keratin, type II cytoskeletal 74 OS=Homo sapiens OX=9606 GN=KRT74 PE=1 SV=1;sp|Q7RTS7|K2C74_HUMAN Keratin, type II cytoskeletal 74 OS=Homo sapiens OX=9606 GN=KRT74 PE=1 SV=2;sp|Q86Y46|K2C73_HUMAN Keratin, type II cytoskeletal 73 OS	con_Homo sapiens	11	3	1	5.1	57.865	529	0	113.38	3098300	3098300	0.00824411	0	0	1		+	56
A0A0J9YXN7;Q96Q06	Perilipin-4	PLIN4	tr|A0A0J9YXN7|A0A0J9YXN7_HUMAN Perilipin-4 OS=Homo sapiens OX=9606 GN=PLIN4 PE=1 SV=1;sp|Q96Q06|PLIN4_HUMAN Perilipin-4 OS=Homo sapiens OX=9606 GN=PLIN4 PE=1 SV=2	Homo sapiens	2	1	1	1.6	136.02	1372	1	-2	2989400	2989400	0.00795434	0	0	0	+		18
P07737;K7EJ44;CON__P02584;I3L3D5	Profilin-1	PFN1	sp|P07737|PROF1_HUMAN Profilin-1 OS=Homo sapiens OX=9606 GN=PFN1 PE=1 SV=2;tr|K7EJ44|K7EJ44_HUMAN Profilin OS=Homo sapiens OX=9606 GN=PFN1 PE=1 SV=1;	Homo sapiens	4	4	4	46.4	15.054	140	0	4.9744	2983300	1264000	0.00336331	0	0	4		+	108
J3KP84;E9PPG7;E9PRU6;F2Z2D6;E9PJS8;E9PLY6;Q9NTX5;E9PIU8;H0Y5L2	Ethylmalonyl-CoA decarboxylase	ECHDC1	tr|J3KP84|J3KP84_HUMAN Ethylmalonyl-CoA decarboxylase OS=Homo sapiens OX=9606 GN=ECHDC1 PE=1 SV=1;tr|E9PPG7|E9PPG7_HUMAN Ethylmalonyl-CoA decarboxylase OS=Homo sapiens OX=9606 GN=ECHDC1 PE=1 SV=1;tr|E9PRU6|E9PRU6_HUMAN Ethylmalonyl-CoA decarboxylase (Fragm	Homo sapiens	9	2	2	30.4	13.589	125	0	1.1154	2893900	0	0	2893900	0.0133019	1			70
Q9BQS8	FYVE and coiled-coil domain-containing protein 1	FYCO1	sp|Q9BQS8|FYCO1_HUMAN FYVE and coiled-coil domain-containing protein 1 OS=Homo sapiens OX=9606 GN=FYCO1 PE=1 SV=3	Homo sapiens	1	1	1	0.8	166.98	1478	0	1.7472	2751400	1477400	0.00393114	1274000	0.00585598	3			154
Q96M20	Cyclic nucleotide-binding domain-containing protein 2	CNBD2	sp|Q96M20|CNBD2_HUMAN Cyclic nucleotide-binding domain-containing protein 2 OS=Homo sapiens OX=9606 GN=CNBD2 PE=2 SV=2	Homo sapiens	1	1	1	2.1	67.511	576	0.0088496	0.84435	2706200	0	0	2706200	0.0124391	0			151
J3KS15;Q14197	Peptidyl-tRNA hydrolase ICT1, mitochondrial	ICT1	tr|J3KS15|J3KS15_HUMAN Peptidyl-tRNA hydrolase ICT1, mitochondrial (Fragment) OS=Homo sapiens OX=9606 GN=MRPL58 PE=1 SV=1;sp|Q14197|ICT1_HUMAN Peptidyl-tRNA hydrolase ICT1, mitochondrial OS=Homo sapiens OX=9606 GN=MRPL58 PE=1 SV=1	Homo sapiens	2	1	1	6.8	21.905	192	1	-2	2643400	0	0	2643400	0.0121505	0	+		80
A1L162	Glutamate-rich protein 2	ERICH2	sp|A1L162|ERIC2_HUMAN Glutamate-rich protein 2 OS=Homo sapiens OX=9606 GN=ERICH2 PE=1 SV=1	Homo sapiens	1	1	1	9	17.672	156	1	-2	2601500	2601500	0.0069222	0	0	1	+		33
Q5T8U3;P62424;Q5T8U2	60S ribosomal protein L7a	RPL7A	tr|Q5T8U3|Q5T8U3_HUMAN 60S ribosomal protein L7a (Fragment) OS=Homo sapiens OX=9606 GN=RPL7A PE=1 SV=1;sp|P62424|RL7A_HUMAN 60S ribosomal protein L7a OS=Homo sapiens OX=9606 GN=RPL7A PE=1 SV=2;tr|Q5T8U2|Q5T8U2_HUMAN 60S ribosomal protein L7a OS=Homo sapien	Homo sapiens	3	2	2	12.6	21.545	191	0	157.05	2479300	1732800	0.00461072	0	0	4			126
J3KQL4;A0A0D9SFU9;Q8TF27;Q5VW22;Q5VUJ5;A6NIR3;Q5VTM2	Arf-GAP with GTPase, ANK repeat and PH domain-containing protein 11;Arf-GAP with GTPase, ANK repeat and PH domain-containing protein 6;Putative Arf-GAP with GTPase, ANK repeat and PH domain-containing protein 7;Arf-GAP with GTPase, ANK repeat and PH domain-containing protein 5;Arf-GAP with GTPase, ANK repeat and PH domain-containing protein 9	AGAP5;AGAP11;AGAP6;AGAP7P;AGAP9	tr|J3KQL4|J3KQL4_HUMAN Arf-GAP with GTPase, ANK repeat and PH domain-containing protein 5 OS=Homo sapiens OX=9606 GN=AGAP5 PE=4 SV=1;tr|A0A0D9SFU9|A0A0D9SFU9_HUMAN Arf-GAP with GTPase, ANK repeat and PH domain-containing protein 5 OS=Homo sapiens OX=9606 G	Homo sapiens	7	1	1	2.9	72.982	663	0	0.98666	2419600	0	0	2419600	0.0111218	1			15
Q92522	Histone H1x	H1FX	sp|Q92522|H1X_HUMAN Histone H1.10 OS=Homo sapiens OX=9606 GN=H1-10 PE=1 SV=1	Homo sapiens	1	2	2	12.7	22.487	213	0	141.17	2196500	1318200	0.00350753	878280	0.00403704	3			149
P62258;K7EM20;K7EIT4;B7Z2E6;H0YB80;P27348;Q04917;P31946;P61981;P31947	14-3-3 protein epsilon	YWHAE	sp|P62258|1433E_HUMAN 14-3-3 protein epsilon OS=Homo sapiens OX=9606 GN=YWHAE PE=1 SV=1;tr|K7EM20|K7EM20_HUMAN 14-3-3 protein epsilon (Fragment) OS=Homo sapiens OX=9606 GN=YWHAE PE=1 SV=1	Homo sapiens	10	3	2	16.1	29.174	255	0	70.229	2085200	0	0	1055500	0.00485164	5			123
Q9NZT1	Calmodulin-like protein 5	CALML5	sp|Q9NZT1|CALL5_HUMAN Calmodulin-like protein 5 OS=Homo sapiens OX=9606 GN=CALML5 PE=1 SV=2	Homo sapiens	1	1	1	15.8	15.892	146	0	131.37	2062100	0	0	2062100	0.00947851	3			161
Q9BYD9	Actin-related protein T3	ACTRT3	sp|Q9BYD9|ACTT3_HUMAN Actin-related protein T3 OS=Homo sapiens OX=9606 GN=ACTRT3 PE=2 SV=1	Homo sapiens	1	1	1	6.7	41.007	372	0.0080645	0.75542	1979400	1076800	0.0028652	902670	0.00414915	2			156
F5GX11;P25786	Proteasome subunit alpha type-1	PSMA1	tr|F5GX11|F5GX11_HUMAN Proteasome subunit alpha type-1 OS=Homo sapiens OX=9606 GN=PSMA1 PE=1 SV=1;sp|P25786|PSA1_HUMAN Proteasome subunit alpha type-1 OS=Homo sapiens OX=9606 GN=PSMA1 PE=1 SV=1	Homo sapiens	2	1	1	5	26.505	238	0	1.8371	1795100	0	0	1795100	0.00825124	1			73
H0YJD4;A0A087X2H1;Q9ULT8	E3 ubiquitin-protein ligase HECTD1	HECTD1	tr|H0YJD4|H0YJD4_HUMAN E3 ubiquitin-protein ligase HECTD1 (Fragment) OS=Homo sapiens OX=9606 GN=HECTD1 PE=1 SV=2;tr|A0A087X2H1|A0A087X2H1_HUMAN HECT-type E3 ubiquitin transferase OS=Homo sapiens OX=9606 GN=HECTD1 PE=1 SV=1;sp|Q9ULT8|HECD1_HUMAN E3 ubiquiti	Homo sapiens	3	1	1	2.2	110.38	976	1	-2	1761700	1761700	0.00468762	0	0	0	+		13
Q8N4B1	Sesquipedalian-1	FAM109A	sp|Q8N4B1|SESQ1_HUMAN Sesquipedalian-1 OS=Homo sapiens OX=9606 GN=PHETA1 PE=1 SV=1	Homo sapiens	1	1	1	6.4	27.215	249	1	-2	1643300	0	0	1643300	0.00755348	2	+		146
H7C3T3;A0A0D9SGH2;A0A5F9ZH95;A0A087X0N0;A0A0D9SFL5;C9JC32;A0A5F9ZI06;Q9UPV9	Trafficking kinesin-binding protein 1	TRAK1	tr|H7C3T3|H7C3T3_HUMAN Trafficking kinesin-binding protein 1 (Fragment) OS=Homo sapiens OX=9606 GN=TRAK1 PE=1 SV=1;tr|A0A0D9SGH2|A0A0D9SGH2_HUMAN Trafficking kinesin-binding protein 1 OS=Homo sapiens OX=9606 GN=TRAK1 PE=1 SV=1;tr|A0A5F9ZH95|A0A5F9ZH95_HUMA	Homo sapiens	8	1	1	5.7	33.752	300	0	0.94631	1625400	1625400	0.00432494	0	0	1			7
C9J9H5;C9JX80		MAD1L1	tr|C9J9H5|C9J9H5_HUMAN Mitotic spindle assembly checkpoint protein MAD1 (Fragment) OS=Homo sapiens OX=9606 GN=MAD1L1 PE=1 SV=1;tr|C9JX80|C9JX80_HUMAN Mitotic spindle assembly checkpoint protein MAD1 (Fragment) OS=Homo sapiens OX=9606 GN=MAD1L1 PE=1 SV=1	Homo sapiens	2	1	1	58.5	4.7212	41	1	-2	1602200	0	0	0	0	0	+		44
Q16649	Nuclear factor interleukin-3-regulated protein	NFIL3	sp|Q16649|NFIL3_HUMAN Nuclear factor interleukin-3-regulated protein OS=Homo sapiens OX=9606 GN=NFIL3 PE=1 SV=2	Homo sapiens	1	1	1	2.2	51.471	462	0.0086207	0.82673	1597900	0	0	1597900	0.0073448	1			142
P01019	Angiotensinogen;Angiotensin-1;Angiotensin-2;Angiotensin-3;Angiotensin-4;Angiotensin 1-9;Angiotensin 1-7;Angiotensin 1-5;Angiotensin 1-4	AGT	sp|P01019|ANGT_HUMAN Angiotensinogen OS=Homo sapiens OX=9606 GN=AGT PE=1 SV=1	Homo sapiens	1	1	1	2.1	53.154	485	0	1.3667	1494200	0	0	1494200	0.00686814	0			107
F5H523;Q9P2K6	Kelch-like protein 42	KLHL42	tr|F5H523|F5H523_HUMAN Kelch-like protein 42 OS=Homo sapiens OX=9606 GN=KLHL42 PE=1 SV=1;sp|Q9P2K6|KLH42_HUMAN Kelch-like protein 42 OS=Homo sapiens OX=9606 GN=KLHL42 PE=1 SV=2	Homo sapiens	2	1	1	3.5	41.022	369	1	-2	1438300	1438300	0.0038271	0	0	0	+		74
O75531	Barrier-to-autointegration factor;Barrier-to-autointegration factor, N-terminally processed	BANF1	sp|O75531|BAF_HUMAN Barrier-to-autointegration factor OS=Homo sapiens OX=9606 GN=BANF1 PE=1 SV=1	Homo sapiens	1	2	2	29.2	10.058	89	0	143.46	1406700	0	0	0	0	3			105
Q01469	Fatty acid-binding protein, epidermal	FABP5	sp|Q01469|FABP5_HUMAN Fatty acid-binding protein 5 OS=Homo sapiens OX=9606 GN=FABP5 PE=1 SV=3	Homo sapiens	1	1	1	6.7	15.164	135	0	18.535	1396300	0	0	1396300	0.00641814	0			134
F8WE65;C9J5S7;P62937	Peptidyl-prolyl cis-trans isomerase;Peptidyl-prolyl cis-trans isomerase A;Peptidyl-prolyl cis-trans isomerase A, N-terminally processed	PPIA	tr|F8WE65|F8WE65_HUMAN Peptidyl-prolyl cis-trans isomerase OS=Homo sapiens OX=9606 GN=PPIA PE=1 SV=1;tr|C9J5S7|C9J5S7_HUMAN Peptidyl-prolyl cis-trans isomerase OS=Homo sapiens OX=9606 GN=PPIA PE=1 SV=1;sp|P62937|PPIA_HUMAN Peptidyl-prolyl cis-trans isomera	Homo sapiens	3	1	1	22.5	13.022	120	0	2.8741	1367700	0	0	0	0	2			43
E5RJ48;A0A087X1K9		LYPLA1	tr|E5RJ48|E5RJ48_HUMAN Acyl-protein thioesterase 1 (Fragment) OS=Homo sapiens OX=9606 GN=LYPLA1 PE=1 SV=1;tr|A0A087X1K9|A0A087X1K9_HUMAN Acyl-protein thioesterase 1 OS=Homo sapiens OX=9606 GN=LYPLA1 PE=1 SV=1	Homo sapiens	2	1	1	28.9	9.6199	90	0	0.90133	1351300	1351300	0.0035956	0	0	1			10
O95478;A0A0A0MQZ6	Ribosome biogenesis protein NSA2 homolog	NSA2	sp|O95478|NSA2_HUMAN Ribosome biogenesis protein NSA2 homolog OS=Homo sapiens OX=9606 GN=NSA2 PE=1 SV=1;tr|A0A0A0MQZ6|A0A0A0MQZ6_HUMAN Ribosome biogenesis protein NSA2 homolog OS=Homo sapiens OX=9606 GN=NSA2 PE=1 SV=1	Homo sapiens	2	2	2	8.1	30.065	260	0	1.9222	1278200	1085200	0.00288755	0	0	3			106
Q15773	Myeloid leukemia factor 2	MLF2	sp|Q15773|MLF2_HUMAN Myeloid leukemia factor 2 OS=Homo sapiens OX=9606 GN=MLF2 PE=1 SV=1	Homo sapiens	1	1	1	6.5	28.147	248	0.0081301	0.7622	1112800	0	0	0	0	2			141
A0A087WYW3;P30414	NK-tumor recognition protein;Putative peptidyl-prolyl cis-trans isomerase	NKTR	tr|A0A087WYW3|A0A087WYW3_HUMAN NK-tumor recognition protein OS=Homo sapiens OX=9606 GN=NKTR PE=1 SV=1;sp|P30414|NKTR_HUMAN NK-tumor recognition protein OS=Homo sapiens OX=9606 GN=NKTR PE=1 SV=2	Homo sapiens	2	1	1	0.8	131.82	1162	0	1.0793	1037500	0	0	1037500	0.0047689	0			5
A0A2R8Y811;P62263	40S ribosomal protein S14	RPS14	tr|A0A2R8Y811|A0A2R8Y811_HUMAN 40S ribosomal protein S14 (Fragment) OS=Homo sapiens OX=9606 GN=RPS14 PE=1 SV=1;sp|P62263|RS14_HUMAN 40S ribosomal protein S14 OS=Homo sapiens OX=9606 GN=RPS14 PE=1 SV=3	Homo sapiens	2	1	1	8.7	16.159	150	0	1.1886	989190	989190	0.00263208	0	0	2			24
P30305	M-phase inducer phosphatase 2	CDC25B	sp|P30305|MPIP2_HUMAN M-phase inducer phosphatase 2 OS=Homo sapiens OX=9606 GN=CDC25B PE=1 SV=2	Homo sapiens	1	1	1	4.1	64.987	580	0.0079365	0.7479	981990	981990	0.00261293	0	0	1			116
P62269;J3JS69	40S ribosomal protein S18	RPS18	sp|P62269|RS18_HUMAN 40S ribosomal protein S18 OS=Homo sapiens OX=9606 GN=RPS18 PE=1 SV=3;tr|J3JS69|J3JS69_HUMAN 40S ribosomal protein S18 OS=Homo sapiens OX=9606 GN=RPS18 PE=1 SV=1	Homo sapiens	2	2	2	13.8	17.718	152	0	8.3416	952830	0	0	0	0	2			125
H0YL22;Q9Y375	Complex I intermediate-associated protein 30, mitochondrial	NDUFAF1	tr|H0YL22|H0YL22_HUMAN Complex I intermediate-associated protein 30, mitochondrial OS=Homo sapiens OX=9606 GN=NDUFAF1 PE=1 SV=1;sp|Q9Y375|CIA30_HUMAN Complex I intermediate-associated protein 30, mitochondrial OS=Homo sapiens OX=9606 GN=NDUFAF1 PE=1 SV=2	Homo sapiens	2	1	1	7.7	30.042	261	1	-2	952080	0	0	952080	0.00437627	1	+		78
H0YBG7;H0YBD7;H0YB39;E9PCY7;G8JLB6;P52597;P31943	Heterogeneous nuclear ribonucleoprotein F;Heterogeneous nuclear ribonucleoprotein F, N-terminally processed;Heterogeneous nuclear ribonucleoprotein H;Heterogeneous nuclear ribonucleoprotein H, N-terminally processed	HNRNPH1;HNRNPF	tr|H0YBG7|H0YBG7_HUMAN Heterogeneous nuclear ribonucleoprotein H (Fragment) OS=Homo sapiens OX=9606 GN=HNRNPH1 PE=1 SV=1;tr|H0YBD7|H0YBD7_HUMAN Heterogeneous nuclear ribonucleoprotein H (Fragment) OS=Homo sapiens OX=9606 GN=HNRNPH1 PE=1 SV=8;tr|H0YB39|H0YB	Homo sapiens	7	1	1	9.2	19.761	185	0	1.6157	919590	0	0	414410	0.00190485	3			67
M0R210;P62249;M0R3H0;Q6IPX4;M0QX76;M0R1M5	40S ribosomal protein S16	RPS16	tr|M0R210|M0R210_HUMAN 40S ribosomal protein S16 OS=Homo sapiens OX=9606 GN=RPS16 PE=1 SV=1;sp|P62249|RS16_HUMAN 40S ribosomal protein S16 OS=Homo sapiens OX=9606 GN=RPS16 PE=1 SV=2;tr|M0R3H0|M0R3H0_HUMAN 40S ribosomal protein S16 OS=Homo sapiens OX=9606 G	Homo sapiens	6	3	3	22.5	14.419	129	0	3.2482	896790	896790	0.00238622	0	0	6			102
D6R9J6;D6RAC4;D6RC86;D6RGK1;D6R9U6;D6RHD1;D6RJE1;D6RE69;D6R9I1;A0A1B0GV48;D6RBC4;Q8NAP3	Zinc finger and BTB domain-containing protein 38	ZBTB38	tr|D6R9J6|D6R9J6_HUMAN Zinc finger and BTB domain-containing protein 38 (Fragment) OS=Homo sapiens OX=9606 GN=ZBTB38 PE=1 SV=1;tr|D6RAC4|D6RAC4_HUMAN Zinc finger and BTB domain-containing protein 38 (Fragment) OS=Homo sapiens OX=9606 GN=ZBTB38 PE=1 SV=8;tr	Homo sapiens	12	1	1	55.9	3.9225	34	0.0097087	0.88663	860190	0	0	860190	0.00395389	1			22
P14923;A0A2R8Y6G0;A0A2R8Y804;A0A2R8Y543;A0A2R8Y5C3;A0A2R8Y750;A0A2R8Y5Z1;B4DGU4;A0A2R8YCH5;A0A2R8Y7Z0;A0A2R8Y5A3;P35222	Junction plakoglobin	JUP	sp|P14923|PLAK_HUMAN Junction plakoglobin OS=Homo sapiens OX=9606 GN=JUP PE=1 SV=3	Homo sapiens	12	5	5	10.6	81.744	745	0	12.826	845160	845160	0.00224884	0	0	6			113
A0A0U1RQJ0;J3KTA4;A0A1X7SBZ2;A0A5H1ZRQ2;P17844;Q92841	Probable ATP-dependent RNA helicase DDX5;Probable ATP-dependent RNA helicase DDX17	DDX5;DDX17	tr|A0A0U1RQJ0|A0A0U1RQJ0_HUMAN Probable ATP-dependent RNA helicase DDX17 (Fragment) OS=Homo sapiens OX=9606 GN=DDX17 PE=1 SV=1;tr|J3KTA4|J3KTA4_HUMAN DEAD box protein 5 OS=Homo sapiens OX=9606 GN=DDX5 PE=1 SV=1;tr|A0A1X7SBZ2|A0A1X7SBZ2_HUMAN RNA helicase O	Homo sapiens	6	1	1	21.4	5.9768	56	0	2.1006	825600	0	0	0	0	2			20
E7ETK0;A0A2R8Y849;A0A2R8YD14;P62847;A0A2R8Y8A0	40S ribosomal protein S24	RPS24	tr|E7ETK0|E7ETK0_HUMAN 40S ribosomal protein S24 OS=Homo sapiens OX=9606 GN=RPS24 PE=1 SV=1;tr|A0A2R8Y849|A0A2R8Y849_HUMAN 40S ribosomal protein S24 OS=Homo sapiens OX=9606 GN=RPS24 PE=1 SV=1;tr|A0A2R8YD14|A0A2R8YD14_HUMAN 40S ribosomal protein S24 OS=Homo	Homo sapiens	5	2	2	18.3	15.197	131	0	39.759	800580	366700	0.000975733	0	0	3			25
A0A494C0J7;Q08188	Protein-glutamine gamma-glutamyltransferase E;Protein-glutamine gamma-glutamyltransferase E 50 kDa catalytic chain;Protein-glutamine gamma-glutamyltransferase E 27 kDa non-catalytic chain	TGM3	tr|A0A494C0J7|A0A494C0J7_HUMAN TGc domain-containing protein OS=Homo sapiens OX=9606 PE=3 SV=1;sp|Q08188|TGM3_HUMAN Protein-glutamine gamma-glutamyltransferase E OS=Homo sapiens OX=9606 GN=TGM3 PE=1 SV=4	Homo sapiens	2	1	1	1.5	78.856	712	0	1.0366	714810	714810	0.001902	0	0	1			29
P31942	Heterogeneous nuclear ribonucleoprotein H3	HNRNPH3	sp|P31942|HNRH3_HUMAN Heterogeneous nuclear ribonucleoprotein H3 OS=Homo sapiens OX=9606 GN=HNRNPH3 PE=1 SV=2	Homo sapiens	1	1	1	4.9	36.926	346	0	31.493	705810	705810	0.00187805	0	0	3			117
P83436	Conserved oligomeric Golgi complex subunit 7	COG7	sp|P83436|COG7_HUMAN Conserved oligomeric Golgi complex subunit 7 OS=Homo sapiens OX=9606 GN=COG7 PE=1 SV=1	Homo sapiens	1	1	1	1.4	86.343	770	1	-2	704480	704480	0.00187451	0	0	0	+		133
Q8WTQ4	Uncharacterized protein C16orf78	C16orf78	sp|Q8WTQ4|CP078_HUMAN Uncharacterized protein C16orf78 OS=Homo sapiens OX=9606 GN=C16orf78 PE=2 SV=1	Homo sapiens	1	1	1	5.7	30.819	265	1	-2	658520	0	0	658520	0.00302691	1	+		148
K7ESL1;P83876	Thioredoxin-like protein 4A	TXNL4A	tr|K7ESL1|K7ESL1_HUMAN Thioredoxin-like protein 4A OS=Homo sapiens OX=9606 GN=TXNL4A PE=1 SV=1;sp|P83876|TXN4A_HUMAN Thioredoxin-like protein 4A OS=Homo sapiens OX=9606 GN=TXNL4A PE=1 SV=1	Homo sapiens	2	1	1	28.2	8.4627	71	0.0096154	0.88002	649330	0	0	649330	0.00298467	1			86
A0A6Q8PFE4;E7EVS6;P63261;P60709;I3L3I0;I3L1U9;I3L4N8;A6NL76;A0A2R8Y793;P68133;P68032;A0A2R8YFE2;C9JUM1;C9JZR7;G5E9R0;K7EM38;A0A6Q8PH58;A0A2R8YEA7;I3L3R2;A0A2R8YGF8;J3KT65;Q9BYX7;P63267;P62736;P0CG39;Q6S8J3;P0CG38;A5A3E0	Actin, cytoplasmic 2;Actin, cytoplasmic 2, N-terminally processed;Actin, cytoplasmic 1;Actin, cytoplasmic 1, N-terminally processed;Actin, alpha skeletal muscle;Actin, alpha cardiac muscle 1	ACTB;ACTG1;ACTA1;ACTC1	tr|A0A6Q8PFE4|A0A6Q8PFE4_HUMAN Actin, cytoplasmic 1 OS=Homo sapiens OX=9606 GN=ACTB PE=1 SV=1;tr|E7EVS6|E7EVS6_HUMAN Actin, cytoplasmic 1 OS=Homo sapiens OX=9606 GN=ACTB PE=1 SV=9;sp|P63261|ACTG_HUMAN Actin, cytoplasmic 2 OS=Homo sapiens OX=9606 GN=ACTG1 P	Homo sapiens	28	3	3	9.6	37.34	332	0	3.4689	582170	0	0	0	0	2			32
CON__P02769			>sp|P02769|ALBU_BOVIN Albumin OS=Bos taurus OX=9913 GN=ALB PE=1 SV=4	con	1	1	1	2.1	69.293	607	0	51.523	560660	560660	0.00149183	0	0	2		+	49
A6PW80;Q5JR01;A0A087WV01;A0A087WVQ9;Q5VTE0;P68104;A0A6Q8PFK6;A0A2R8YDN5;A0A2R8Y660;A0A2R8Y488;A0A2U3TZH3;Q05639	Elongation factor 1-alpha;Putative elongation factor 1-alpha-like 3;Elongation factor 1-alpha 1;Elongation factor 1-alpha 2	EEF1A1;EEF1A1P5;EEF1A2	tr|A6PW80|A6PW80_HUMAN Elongation factor 1-alpha 1 (Fragment) OS=Homo sapiens OX=9606 GN=EEF1A1 PE=4 SV=8;tr|Q5JR01|Q5JR01_HUMAN Elongation factor 1-alpha 1 (Fragment) OS=Homo sapiens OX=9606 GN=EEF1A1 PE=1 SV=1;tr|A0A087WV01|A0A087WV01_HUMAN Elongation fa	Homo sapiens	12	2	2	25.5	11.994	106	0	1.6159	557880	0	0	0	0	2			3
H0YDU1;E9PJK4;A6NI28	Rho GTPase-activating protein 42	ARHGAP42	tr|H0YDU1|H0YDU1_HUMAN Rho GTPase-activating protein 42 (Fragment) OS=Homo sapiens OX=9606 GN=ARHGAP42 PE=1 SV=1;tr|E9PJK4|E9PJK4_HUMAN Rho GTPase-activating protein 42 OS=Homo sapiens OX=9606 GN=ARHGAP42 PE=1 SV=1;sp|A6NI28|RHG42_HUMAN Rho GTPase-activati	Homo sapiens	3	1	1	8.3	27.38	230	1	-2	546320	0	0	546320	0.00251118	1	+		35
K7ELC7;P61353	60S ribosomal protein L27	RPL27	tr|K7ELC7|K7ELC7_HUMAN 60S ribosomal protein L27 (Fragment) OS=Homo sapiens OX=9606 GN=RPL27 PE=1 SV=1;sp|P61353|RL27_HUMAN 60S ribosomal protein L27 OS=Homo sapiens OX=9606 GN=RPL27 PE=1 SV=2	Homo sapiens	2	1	1	7.6	16.359	144	0.008	0.75159	529150	0	0	0	0	1			84
B8ZZJ0;B9A032;G2XKQ0;B8ZZN6;P63165	Small ubiquitin-related modifier;Small ubiquitin-related modifier 1	SUMO1	tr|B8ZZJ0|B8ZZJ0_HUMAN Small ubiquitin-related modifier 1 OS=Homo sapiens OX=9606 GN=SUMO1 PE=1 SV=1;tr|B9A032|B9A032_HUMAN Small ubiquitin-related modifier 1 OS=Homo sapiens OX=9606 GN=SUMO1 PE=1 SV=1;sp|G2XKQ0|SUMO5_HUMAN Small ubiquitin-related modifier	Homo sapiens	5	1	1	20.7	6.6846	58	0	0.92793	492360	0	0	0	0	1			40
A0A2R8Y705;A0A2R8Y7K6;M0QZR8;A0A087WYJ2;M0R2B7;P28340	DNA polymerase;DNA polymerase delta catalytic subunit	POLD1	tr|A0A2R8Y705|A0A2R8Y705_HUMAN DNA polymerase (Fragment) OS=Homo sapiens OX=9606 GN=POLD1 PE=1 SV=1;tr|A0A2R8Y7K6|A0A2R8Y7K6_HUMAN DNA-directed DNA polymerase OS=Homo sapiens OX=9606 GN=POLD1 PE=1 SV=1;tr|M0QZR8|M0QZR8_HUMAN DNA polymerase OS=Homo sapiens	Homo sapiens	6	1	1	6.3	50.13	447	0.0086957	0.83037	483180	0	0	483180	0.00222095	1			4
P12004	Proliferating cell nuclear antigen	PCNA	sp|P12004|PCNA_HUMAN Proliferating cell nuclear antigen OS=Homo sapiens OX=9606 GN=PCNA PE=1 SV=1	Homo sapiens	1	1	1	5	28.768	261	0	12.379	436690	0	0	0	0	1			111
B0AZS6;E7EX29;P63104;E7ESK7	14-3-3 protein zeta/delta	YWHAZ	tr|B0AZS6|B0AZS6_HUMAN 14-3-3 protein zeta/delta OS=Homo sapiens OX=9606 GN=YWHAZ PE=1 SV=1;tr|E7EX29|E7EX29_HUMAN 14-3-3 protein zeta/delta (Fragment) OS=Homo sapiens OX=9606 GN=YWHAZ PE=1 SV=1;sp|P63104|1433Z_HUMAN 14-3-3 protein zeta/delta OS=Homo sapie	Homo sapiens	4	2	1	13.1	19.072	168	0	7.5833	427130	0	0	427130	0.00196332	3			38
Q5T6W2;P61978	Heterogeneous nuclear ribonucleoprotein K	HNRNPK	tr|Q5T6W2|Q5T6W2_HUMAN Heterogeneous nuclear ribonucleoprotein K (Fragment) OS=Homo sapiens OX=9606 GN=HNRNPK PE=1 SV=1;sp|P61978|HNRPK_HUMAN Heterogeneous nuclear ribonucleoprotein K OS=Homo sapiens OX=9606 GN=HNRNPK PE=1 SV=1	Homo sapiens	2	1	1	4.5	41.807	379	0.0092593	0.86375	377270	0	0	0	0	1			121
A0A5F9ZH78;A0A5F9ZGN6;P05089	Arginase-1	ARG1	tr|A0A5F9ZH78|A0A5F9ZH78_HUMAN Arginase-1 OS=Homo sapiens OX=9606 GN=ARG1 PE=1 SV=1;tr|A0A5F9ZGN6|A0A5F9ZGN6_HUMAN Arginase OS=Homo sapiens OX=9606 GN=ARG1 PE=1 SV=1;sp|P05089|ARGI1_HUMAN Arginase-1 OS=Homo sapiens OX=9606 GN=ARG1 PE=1 SV=2	Homo sapiens	3	1	1	8.4	25.66	237	0	1.9292	323620	323620	0.000861104	0	0	2			31
Q5TBN5;Q5TBN3;P13796	Plastin-2	LCP1	tr|Q5TBN5|Q5TBN5_HUMAN Plastin-2 (Fragment) OS=Homo sapiens OX=9606 GN=LCP1 PE=1 SV=1;tr|Q5TBN3|Q5TBN3_HUMAN Plastin-2 (Fragment) OS=Homo sapiens OX=9606 GN=LCP1 PE=1 SV=1;sp|P13796|PLSL_HUMAN Plastin-2 OS=Homo sapiens OX=9606 GN=LCP1 PE=1 SV=6	Homo sapiens	3	1	1	22.7	7.3752	66	1	-2	307070	307070	0.000817067	0	0	2	+		112
Q96SQ7	Protein atonal homolog 8	ATOH8	sp|Q96SQ7|ATOH8_HUMAN Protein atonal homolog 8 OS=Homo sapiens OX=9606 GN=ATOH8 PE=1 SV=2	Homo sapiens	1	1	1	13.4	34.643	321	0.0087719	0.84055	271610	271610	0.000722713	0	0	0			152
Q6DKI1	60S ribosomal protein L7-like 1	RPL7L1	sp|Q6DKI1|RL7L_HUMAN 60S ribosomal protein L7-like 1 OS=Homo sapiens OX=9606 GN=RPL7L1 PE=1 SV=2	Homo sapiens	1	1	1	7.1	29.669	255	0	1.7397	253410	0	0	0	0	2			144
A0A2R8Y4C6;A0A2R8Y4Z5;H0Y7K3;A0A2R8Y5D7;H0Y7U8;H0Y470;A0A2R8YDS8;A0A2R8Y7D4;A0A2R8YCU9;A0A2R8Y885;A0A2R8Y820;H7C2C6;A0A2R8Y7B1;A0A2U3TZV9;Q3V6T2	Girdin	CCDC88A	tr|A0A2R8Y4C6|A0A2R8Y4C6_HUMAN Girdin (Fragment) OS=Homo sapiens OX=9606 GN=CCDC88A PE=1 SV=1;tr|A0A2R8Y4Z5|A0A2R8Y4Z5_HUMAN Girdin (Fragment) OS=Homo sapiens OX=9606 GN=CCDC88A PE=1 SV=1;tr|H0Y7K3|H0Y7K3_HUMAN Girdin (Fragment) OS=Homo sapiens OX=9606 GN=	Homo sapiens	15	1	1	7.8	18.071	166	1	-2	152020	152020	0.000404502	0	0	0	+		23
C9IZL7;Q15233	Non-POU domain-containing octamer-binding protein	NONO	tr|C9IZL7|C9IZL7_HUMAN Non-POU domain-containing octamer-binding protein (Fragment) OS=Homo sapiens OX=9606 GN=NONO PE=1 SV=1;sp|Q15233|NONO_HUMAN Non-POU domain-containing octamer-binding protein OS=Homo sapiens OX=9606 GN=NONO PE=1 SV=4	Homo sapiens	2	1	1	11.1	23.673	207	0	1.17	147630	0	0	0	0	2			41
C9JN01;C9JB42;C9JDR7;C9JDX6;F8WCZ4;C9J2P2;E9PH18;C9J2C4;A0A0J9YX62;O75190	DnaJ homolog subfamily B member 6	DNAJB6	tr|C9JN01|C9JN01_HUMAN DnaJ homolog subfamily B member 6 (Fragment) OS=Homo sapiens OX=9606 GN=DNAJB6 PE=1 SV=1;tr|C9JB42|C9JB42_HUMAN DnaJ homolog subfamily B member 6 (Fragment) OS=Homo sapiens OX=9606 GN=DNAJB6 PE=1 SV=1;tr|C9JDR7|C9JDR7_HUMAN DnaJ homo	Homo sapiens	10	1	1	20	5.4111	45	0	3.6699	77255	0	0	77255	0.000355105	1			17
CON__Q8N1N4-2;CON__Q7RTT2;Q8N1N4	Keratin, type II cytoskeletal 78	KRT78	;;sp|Q8N1N4|K2C78_HUMAN Keratin, type II cytoskeletal 78 OS=Homo sapiens OX=9606 GN=KRT78 PE=1 SV=2	con_Homo sapiens	3	2	1	3.8	56.964	521	0	33.274	0	0	0	0	0	1		+	58
P62851	40S ribosomal protein S25	RPS25	sp|P62851|RS25_HUMAN 40S ribosomal protein S25 OS=Homo sapiens OX=9606 GN=RPS25 PE=1 SV=1	Homo sapiens	1	1	1	7.2	13.742	125	0	2.3002	0	0	0	0	0	1			129
P81605	Dermcidin;Survival-promoting peptide;DCD-1	DCD	sp|P81605|DCD_HUMAN Dermcidin OS=Homo sapiens OX=9606 GN=DCD PE=1 SV=2	Homo sapiens	1	1	1	10	11.284	110	0	2.9791	0	0	0	0	0	1			132
Q13009	T-lymphoma invasion and metastasis-inducing protein 1	TIAM1	sp|Q13009|TIAM1_HUMAN T-lymphoma invasion and metastasis-inducing protein 1 OS=Homo sapiens OX=9606 GN=TIAM1 PE=1 SV=2	Homo sapiens	1	1	1	0.5	177.51	1591	0.010101	0.89853	0	0	0	0	0	1			138
Q6MZQ0	Proline-rich protein 5-like	PRR5L	sp|Q6MZQ0|PRR5L_HUMAN Proline-rich protein 5-like OS=Homo sapiens OX=9606 GN=PRR5L PE=1 SV=2	Homo sapiens	1	1	1	5.4	40.835	368	0.01	0.89444	0	0	0	0	0	3			145
Q9BRL6	Serine/arginine-rich splicing factor 8	SRSF8	sp|Q9BRL6|SRSF8_HUMAN Serine/arginine-rich splicing factor 8 OS=Homo sapiens OX=9606 GN=SRSF8 PE=1 SV=1	Homo sapiens	1	1	1	6	32.287	282	0.0089286	0.85148	0	0	0	0	0	1			155
Q9C0J8	pre-mRNA 3 end processing protein WDR33	WDR33	sp|Q9C0J8|WDR33_HUMAN pre-mRNA 3 end processing protein WDR33 OS=Homo sapiens OX=9606 GN=WDR33 PE=1 SV=2	Homo sapiens	1	1	1	1.9	145.89	1336	1	-2	0	0	0	0	0	1	+		157
A0A087X1B6		AR	tr|A0A087X1B6|A0A087X1B6_HUMAN Androgen receptor OS=Homo sapiens OX=9606 GN=AR PE=1 SV=1	Homo sapiens	1	1	1	2.7	79.421	737	1	-2	0	0	0	0	0	1	+		9
A0A087X220;Q6ZMI3	Gliomedin	GLDN	tr|A0A087X220|A0A087X220_HUMAN Gliomedin (Fragment) OS=Homo sapiens OX=9606 GN=GLDN PE=1 SV=1;sp|Q6ZMI3|GLDN_HUMAN Gliomedin OS=Homo sapiens OX=9606 GN=GLDN PE=1 SV=1	Homo sapiens	2	1	1	11.9	15.666	151	1	-2	0	0	0	0	0	1	+		12
A0A0G2JLM5			tr|A0A0G2JLM5|A0A0G2JLM5_HUMAN Uncharacterized protein OS=Homo sapiens OX=9606 PE=4 SV=1	Homo sapiens	1	1	1	2	43.84	398	0	1.3653	0	0	0	0	0	1			16
A0A494C061			tr|A0A494C061|A0A494C061_HUMAN Mitochondrial Rho GTPase 1 (Fragment) OS=Homo sapiens OX=9606 GN=RHOT1 PE=1 SV=1	Homo sapiens	1	1	1	9.3	24.386	214	0	1.0024	0	0	0	0	0	1			28
A0A494C0S0			tr|A0A494C0S0|A0A494C0S0_HUMAN Sorting nexin-25 OS=Homo sapiens OX=9606 GN=SNX25 PE=1 SV=1	Homo sapiens	1	1	1	1.7	114.21	1004	1	-2	0	0	0	0	0	1	+		30
A2A3C4;A2A3C1;A2A3C3;A2A3C6;A2A3C2;O60241	Brain-specific angiogenesis inhibitor 2	ADGRB2;BAI2	tr|A2A3C4|A2A3C4_HUMAN Adhesion G protein-coupled receptor B2 (Fragment) OS=Homo sapiens OX=9606 GN=ADGRB2 PE=1 SV=1;tr|A2A3C1|A2A3C1_HUMAN Adhesion G protein-coupled receptor B2 OS=Homo sapiens OX=9606 GN=ADGRB2 PE=1 SV=1;tr|A2A3C3|A2A3C3_HUMAN Adhesion G	Homo sapiens	6	1	1	0.9	92.029	847	0	1.2356	0	0	0	0	0	1			34
D6R9W5;D6RJF1;D6RGH3;D6RG30;Q2TB18	Protein asteroid homolog 1	ASTE1	tr|D6R9W5|D6R9W5_HUMAN Protein asteroid homolog 1 (Fragment) OS=Homo sapiens OX=9606 GN=ASTE1 PE=1 SV=1;tr|D6RJF1|D6RJF1_HUMAN Protein asteroid homolog 1 (Fragment) OS=Homo sapiens OX=9606 GN=ASTE1 PE=1 SV=8;tr|D6RGH3|D6RGH3_HUMAN Protein asteroid homolog	Homo sapiens	5	1	1	47.9	5.6224	48	1	-2	0	0	0	0	0	1	+		62
D6RF53;D6R974;D6RE83;D6R956;P09936	Ubiquitin carboxyl-terminal hydrolase;Ubiquitin carboxyl-terminal hydrolase isozyme L1	UCHL1	tr|D6RF53|D6RF53_HUMAN Ubiquitin carboxyl-terminal hydrolase (Fragment) OS=Homo sapiens OX=9606 GN=UCHL1 PE=1 SV=1;tr|D6R974|D6R974_HUMAN Ubiquitin carboxyl-terminal hydrolase OS=Homo sapiens OX=9606 GN=UCHL1 PE=1 SV=1;tr|D6RE83|D6RE83_HUMAN Ubiquitin carb	Homo sapiens	5	1	1	31	6.3355	58	1	-2	0	0	0	0	0	1	+		61
E5RIZ5		PPIA	tr|E5RIZ5|E5RIZ5_HUMAN Peptidyl-prolyl cis-trans isomerase A OS=Homo sapiens OX=9606 GN=PPIA PE=1 SV=1	Homo sapiens	1	1	1	53.4	6.178	58	1	-2	0	0	0	0	0	1	+		65
E9PK67;E9PNI7;Q53GL7	Poly [ADP-ribose] polymerase 10	PARP10	tr|E9PK67|E9PK67_HUMAN Poly [ADP-ribose] polymerase OS=Homo sapiens OX=9606 GN=PARP10 PE=1 SV=1;tr|E9PNI7|E9PNI7_HUMAN Poly [ADP-ribose] polymerase OS=Homo sapiens OX=9606 GN=PARP10 PE=1 SV=1;sp|Q53GL7|PAR10_HUMAN Protein mono-ADP-ribosyltransferase PARP10	Homo sapiens	3	1	1	0.9	109.1	1016	0.0082645	0.76513	0	0	0	0	0	1			71
F8WEJ8;F8WCI0;B5MC67;Q7Z6J6	FERM domain-containing protein 5	FRMD5	tr|F8WEJ8|F8WEJ8_HUMAN FERM domain-containing protein 5 OS=Homo sapiens OX=9606 GN=FRMD5 PE=1 SV=1;tr|F8WCI0|F8WCI0_HUMAN FERM domain-containing protein 5 OS=Homo sapiens OX=9606 GN=FRMD5 PE=1 SV=1;tr|B5MC67|B5MC67_HUMAN FERM domain-containing protein 5 OS	Homo sapiens	4	1	1	8.9	14.45	123	1	-2	0	0	0	0	0	1	+		39

## Sheet: in-sol ABV9317
659			34557887100	73854856610
Protein IDs	Protein names	Gene names	Fasta headers	species	Number of proteins	Peptides	Unique peptides	Sequence coverage [%]	Mol. weight [kDa]	Sequence length	Q-value	Score	Sequence coverage AZ ABV9317 in sol [%]	Intensity	Intensity AZ ABV9317 in sol	Intensity %	MS/MS count	Only identified by site	Potential contaminant	id
lcl|AC_000008.1_prot_AP_000199.1_3		E1B 55K	lcl|AC_000008.1_prot_AP_000199.1_3 [protein=E1B 55K] [protein_id=AP_000199.1] [location=2019..3509] [gbkey=CDS]	human Adenovirus 5, host cell	1	3	3	6.5	54.999	496	0	5.0486	6.5	8517100	8517100	0.0115322	4			264
P08238;Q58FF7	Heat shock protein HSP 90-beta	HSP90AB1	sp|P08238|HS90B_HUMAN Heat shock protein HSP 90-beta OS=Homo sapiens OX=9606 GN=HSP90AB1 PE=1 SV=4	Homo sapiens	2	66	40	75.4	83.263	724	0	323.31	75.4	5054400000	5054400000	6.84369	160			357
P08670;B0YJC4;B0YJC5;A0A1B0GTT5;A0A1B0GVG8;H7C5W5;P41219;E7EMV2;E7ESP9;Q16352;P07197;F8W835;P12036	Vimentin	VIM	sp|P08670|VIME_HUMAN Vimentin OS=Homo sapiens OX=9606 GN=VIM PE=1 SV=4;tr|B0YJC4|B0YJC4_HUMAN Vimentin OS=Homo sapiens OX=9606 GN=VIM PE=1 SV=1;tr|B0YJC5|B0YJC5_HUMAN Vimentin OS=Homo sapiens OX=9606 GN=VIM PE=1 SV=1	Homo sapiens	13	50	46	79.6	53.651	466	0	323.31	79.6	4493300000	4493300000	6.08396	121			360
P07900;G3V2J8;Q14568;Q58FG0;Q58FF6;Q58FG1	Heat shock protein HSP 90-alpha	HSP90AA1	sp|P07900|HS90A_HUMAN Heat shock protein HSP 90-alpha OS=Homo sapiens OX=9606 GN=HSP90AA1 PE=1 SV=5	Homo sapiens	6	61	43	65.3	84.659	732	0	323.31	65.3	3265800000	3265800000	4.42192	129			355
P55072;C9IZA5;C9JUP7	Transitional endoplasmic reticulum ATPase	VCP	sp|P55072|TERA_HUMAN Transitional endoplasmic reticulum ATPase OS=Homo sapiens OX=9606 GN=VCP PE=1 SV=4	Homo sapiens	3	70	70	82	89.321	806	0	323.31	82	3199700000	3199700000	4.33242	215			463
P49321;E9PPR5;H0YF33;H0YDS9;E9PNB5;E9PQG5;E9PAU3;E9PKR5;E9PJQ2	Nuclear autoantigenic sperm protein	NASP	sp|P49321|NASP_HUMAN Nuclear autoantigenic sperm protein OS=Homo sapiens OX=9606 GN=NASP PE=1 SV=2	Homo sapiens	9	47	19	79.2	85.237	788	0	323.31	79.2	2563800000	2563800000	3.4714	129			444
P27797;K7EJB9;K7EL50	Calreticulin	CALR	sp|P27797|CALR_HUMAN Calreticulin OS=Homo sapiens OX=9606 GN=CALR PE=1 SV=1;tr|K7EJB9|K7EJB9_HUMAN Calreticulin (Fragment) OS=Homo sapiens OX=9606 GN=CALR PE=1 SV=1	Homo sapiens	3	32	32	80.3	48.141	417	0	213.71	80.3	2106100000	2106100000	2.85167	66			411
P14625;Q96GW1;A0A1W2PRR1;H0YIV0;Q58FF3;F8W026	Endoplasmin	HSP90B1	sp|P14625|ENPL_HUMAN Endoplasmin OS=Homo sapiens OX=9606 GN=HSP90B1 PE=1 SV=1	Homo sapiens	6	52	50	60.1	92.468	803	0	323.31	60.1	2041100000	2041100000	2.76366	132			384
P68371	Tubulin beta-4B chain	TUBB4B	sp|P68371|TBB4B_HUMAN Tubulin beta-4B chain OS=Homo sapiens OX=9606 GN=TUBB4B PE=1 SV=1	Homo sapiens	1	25	2	62.5	49.83	445	0	323.31	62.5	1724200000	1724200000	2.33458	93			496
P62258;B4DJF2;I3L3T1;K7EM20;K7EIT4;I3L0W5;P31947	14-3-3 protein epsilon	YWHAE	sp|P62258|1433E_HUMAN 14-3-3 protein epsilon OS=Homo sapiens OX=9606 GN=YWHAE PE=1 SV=1	Homo sapiens	7	31	29	87.8	29.174	255	0	323.31	87.8	1554700000	1554700000	2.10507	93			478
P06748;E5RI98;E5RGW4	Nucleophosmin	NPM1	sp|P06748|NPM_HUMAN Nucleophosmin OS=Homo sapiens OX=9606 GN=NPM1 PE=1 SV=2	Homo sapiens	3	20	20	78.6	32.575	294	0	323.31	78.6	1512200000	1512200000	2.04753	86			350
P68363;F8VVB9;F8VQQ4;F8VS66;F8VRZ4;F8VX09;F8VWV9;C9JDS9;F8VRK0;F8W0F6;A6NHL2;C9K0S6;F8VXZ7;Q9H853	Tubulin alpha-1B chain	TUBA1B	sp|P68363|TBA1B_HUMAN Tubulin alpha-1B chain OS=Homo sapiens OX=9606 GN=TUBA1B PE=1 SV=1	Homo sapiens	14	29	0	78.9	50.151	451	0	323.31	78.9	1385700000	1385700000	1.87625	81			494
K7ELL7;P14314;K7EPW7;A0A0C4DGP4;K7EKX1;K7EJ70;K7EIP3	Glucosidase 2 subunit beta	PRKCSH	tr|K7ELL7|K7ELL7_HUMAN Glucosidase 2 subunit beta OS=Homo sapiens OX=9606 GN=PRKCSH PE=1 SV=1;sp|P14314|GLU2B_HUMAN Glucosidase 2 subunit beta OS=Homo sapiens OX=9606 GN=PRKCSH PE=1 SV=2	Homo sapiens	7	28	28	59.8	60.192	535	0	323.31	59.8	1102500000	1102500000	1.49279	67			259
P63104;E7EX29;B0AZS6;B7Z2E6;H0YB80;E7ESK7;E5RIR4;E9PD24;E7EVZ2;E5RGE1	14-3-3 protein zeta/delta	YWHAZ	sp|P63104|1433Z_HUMAN 14-3-3 protein zeta/delta OS=Homo sapiens OX=9606 GN=YWHAZ PE=1 SV=1;tr|E7EX29|E7EX29_HUMAN 14-3-3 protein zeta/delta (Fragment) OS=Homo sapiens OX=9606 GN=YWHAZ PE=1 SV=1;tr|B0AZS6|B0AZS6_HUMAN 14-3-3 protein zeta/delta OS=Homo sapie	Homo sapiens	10	21	17	75.9	27.745	245	0	288.77	75.9	877340000	877340000	1.18792	44			487
P60709;E7EVS6;A0A2R8Y793;A0A6Q8PFE4;Q6S8J3;G5E9R0;A0A6Q8PH58;A0A2R8YGF8;C9JUM1;C9JZR7;A5A3E0;A0A2R8YFE2;C9JTX5;A0A2R8YEA7;Q9BYX7;P0CG39;P0CG38;A0A6Q8PGD7;Q562R1;F8WCH0	Actin, cytoplasmic 1;Actin, cytoplasmic 1, N-terminally processed	ACTB	sp|P60709|ACTB_HUMAN Actin, cytoplasmic 1 OS=Homo sapiens OX=9606 GN=ACTB PE=1 SV=1;tr|E7EVS6|E7EVS6_HUMAN Actin, cytoplasmic 1 OS=Homo sapiens OX=9606 GN=ACTB PE=1 SV=9;tr|A0A2R8Y793|A0A2R8Y793_HUMAN Actin, cytoplasmic 1 (Fragment) OS=Homo sapiens OX=9606	Homo sapiens	20	14	1	49.9	41.736	375	0	323.31	49.9	818500000	818500000	1.10825	60			467
P05387;H0YDD8	60S acidic ribosomal protein P2	RPLP2	sp|P05387|RLA2_HUMAN 60S acidic ribosomal protein P2 OS=Homo sapiens OX=9606 GN=RPLP2 PE=1 SV=1	Homo sapiens	2	16	14	97.4	11.665	115	0	323.31	97.4	793000000	793000000	1.07373	73			348
Q13813;A0A0D9SF54;A0A0D9SGF6;A0A0D9SFF6;A0A0D9SFH4;A0A1B0GTB7;A0A1B0GV13;A0A5F9ZHC3	Spectrin alpha chain, non-erythrocytic 1	SPTAN1	sp|Q13813|SPTN1_HUMAN Spectrin alpha chain, non-erythrocytic 1 OS=Homo sapiens OX=9606 GN=SPTAN1 PE=1 SV=3;tr|A0A0D9SF54|A0A0D9SF54_HUMAN Spectrin alpha chain, non-erythrocytic 1 OS=Homo sapiens OX=9606 GN=SPTAN1 PE=1 SV=1;tr|A0A0D9SGF6|A0A0D9SGF6_HUMAN Sp	Homo sapiens	8	89	89	44.6	284.54	2472	0	323.31	44.6	601390000	601390000	0.814286	152			527
P07237;H7BZ94;H0Y3Z3;I3L398;I3L312;I3L4M2;I3NI03;I3L3U6;I3L0S0;I3L3P5	Protein disulfide-isomerase	P4HB	sp|P07237|PDIA1_HUMAN Protein disulfide-isomerase OS=Homo sapiens OX=9606 GN=P4HB PE=1 SV=3;tr|H7BZ94|H7BZ94_HUMAN Protein disulfide-isomerase OS=Homo sapiens OX=9606 GN=P4HB PE=1 SV=2;tr|H0Y3Z3|H0Y3Z3_HUMAN Protein disulfide-isomerase (Fragment) OS=Homo s	Homo sapiens	10	28	28	63	57.116	508	0	249.1	63	512350000	512350000	0.693726	63			352
P67936;A0A2R8YGX3;A0A2R8Y5V9;A0A2R8YH90;A0A2R8YE05;K7ENT6;A0A2R8YEU4;A0A2R8YHD2;A0A590UJB9;A0A590UK79;H0YL80;A0A494C0G0;H0YKX5;H0YKP3;F5H7S3;H7BYY1;H0YKJ4;H0YK48;A0A494BZZ2;B7Z596;A0A0S2Z4G6;Q6ZN40;P09493;A0A5F9UN72;K7EPB9;U3KQK2	Tropomyosin alpha-4 chain	TPM4	sp|P67936|TPM4_HUMAN Tropomyosin alpha-4 chain OS=Homo sapiens OX=9606 GN=TPM4 PE=1 SV=3;tr|A0A2R8YGX3|A0A2R8YGX3_HUMAN Tropomyosin alpha-4 chain OS=Homo sapiens OX=9606 GN=TPM4 PE=1 SV=1;tr|A0A2R8Y5V9|A0A2R8Y5V9_HUMAN Tropomyosin alpha-4 chain OS=Homo sap	Homo sapiens	26	16	9	48	28.521	248	0	235.36	48	508490000	508490000	0.688499	21			491
Q60FE5;P21333;A0A087WWY3;F8WE98;H0Y5C6;H0Y5F3;O75369;A0A669KBC6;H7C2E7	Filamin-A	FLNA	tr|Q60FE5|Q60FE5_HUMAN Filamin-A OS=Homo sapiens OX=9606 GN=FLNA PE=1 SV=1;sp|P21333|FLNA_HUMAN Filamin-A OS=Homo sapiens OX=9606 GN=FLNA PE=1 SV=4;tr|A0A087WWY3|A0A087WWY3_HUMAN Filamin-A OS=Homo sapiens OX=9606 GN=FLNA PE=1 SV=1	Homo sapiens	9	59	57	36.3	278.22	2620	0	323.31	36.3	434800000	434800000	0.588722	86			397
P27824;H0Y9Q7;D6RDP7;D6RAU8;D6RB85;D6RGY2;D6RFL1;H0Y9H1;D6RAQ8;D6RHJ3;D6RD16;O14967	Calnexin	CANX	sp|P27824|CALX_HUMAN Calnexin OS=Homo sapiens OX=9606 GN=CANX PE=1 SV=2;tr|H0Y9Q7|H0Y9Q7_HUMAN Calnexin (Fragment) OS=Homo sapiens OX=9606 GN=CANX PE=1 SV=1	Homo sapiens	12	24	24	39.5	67.567	592	0	163.05	39.5	427380000	427380000	0.578676	51			412
Q08380;K7EP36;K7ESM3;K7EKQ5;K7ERZ6;K7EJY8;K7EJD3;K7ES75;K7EN99	Galectin-3-binding protein	LGALS3BP	sp|Q08380|LG3BP_HUMAN Galectin-3-binding protein OS=Homo sapiens OX=9606 GN=LGALS3BP PE=1 SV=1	Homo sapiens	9	17	17	43.9	65.33	585	0	281.66	43.9	423630000	423630000	0.573598	51			510
Q01082;A0A087WUZ3;F8W6C1;A4QPE4;O15020;P11277	Spectrin beta chain, non-erythrocytic 1	SPTBN1	sp|Q01082|SPTB2_HUMAN Spectrin beta chain, non-erythrocytic 1 OS=Homo sapiens OX=9606 GN=SPTBN1 PE=1 SV=2;tr|A0A087WUZ3|A0A087WUZ3_HUMAN Spectrin beta chain OS=Homo sapiens OX=9606 GN=SPTBN1 PE=1 SV=1	Homo sapiens	6	71	70	39.3	274.61	2364	0	323.31	39.3	396430000	396430000	0.536769	117			501
P05386	60S acidic ribosomal protein P1	RPLP1	sp|P05386|RLA1_HUMAN 60S acidic ribosomal protein P1 OS=Homo sapiens OX=9606 GN=RPLP1 PE=1 SV=1	Homo sapiens	1	6	4	95.6	11.514	114	0	28.49	95.6	369650000	369650000	0.500509	13			347
P05388;F8VWS0;F8VU65;F8VW21;F8VPE8;G3V210;Q8NHW5;F8VQY6;F8VRK7;F8VZS0;F8VS58;F8VWV4;F8W1K8;F8VYN4	60S acidic ribosomal protein P0;60S acidic ribosomal protein P0-like	RPLP0;RPLP0P6	sp|P05388|RLA0_HUMAN 60S acidic ribosomal protein P0 OS=Homo sapiens OX=9606 GN=RPLP0 PE=1 SV=1;tr|F8VWS0|F8VWS0_HUMAN 60S acidic ribosomal protein P0 OS=Homo sapiens OX=9606 GN=RPLP0 PE=1 SV=1;tr|F8VU65|F8VU65_HUMAN 60S acidic ribosomal protein P0 (Fragme	Homo sapiens	14	20	20	72.2	34.273	317	0	157.73	72.2	364580000	364580000	0.493644	51			349
O43707;F5GXS2;H7C144;K7EJH8;K7EP19;H0YJW3;A0A494C1A0;P35609;Q08043;A0A494C0Q3;A0A494C033;A0A494C166;H0YJ11;D6RH00;G3V2E8;G3V5M4;G3V2X9;A0A494C060;F6THM6;A0A087WSZ2	Alpha-actinin-4	ACTN4	sp|O43707|ACTN4_HUMAN Alpha-actinin-4 OS=Homo sapiens OX=9606 GN=ACTN4 PE=1 SV=2;tr|F5GXS2|F5GXS2_HUMAN Alpha-actinin-4 OS=Homo sapiens OX=9606 GN=ACTN4 PE=1 SV=2	Homo sapiens	20	44	31	53.9	104.85	911	0	290.77	53.9	357160000	357160000	0.483597	76			312
Q02952	A-kinase anchor protein 12	AKAP12	sp|Q02952|AKA12_HUMAN A-kinase anchor protein 12 OS=Homo sapiens OX=9606 GN=AKAP12 PE=1 SV=4	Homo sapiens	1	44	44	40.9	191.48	1782	0	323.31	40.9	331350000	331350000	0.44865	67			505
P04406;E7EUT5	Glyceraldehyde-3-phosphate dehydrogenase	GAPDH	sp|P04406|G3P_HUMAN Glyceraldehyde-3-phosphate dehydrogenase OS=Homo sapiens OX=9606 GN=GAPDH PE=1 SV=3;tr|E7EUT5|E7EUT5_HUMAN Glyceraldehyde-3-phosphate dehydrogenase OS=Homo sapiens OX=9606 GN=GAPDH PE=1 SV=1	Homo sapiens	2	14	14	59.7	36.053	335	0	145.39	59.7	313990000	313990000	0.425145	31			343
Q14697;F5H6X6	Neutral alpha-glucosidase AB	GANAB	sp|Q14697|GANAB_HUMAN Neutral alpha-glucosidase AB OS=Homo sapiens OX=9606 GN=GANAB PE=1 SV=3;tr|F5H6X6|F5H6X6_HUMAN Neutral alpha-glucosidase AB OS=Homo sapiens OX=9606 GN=GANAB PE=1 SV=1	Homo sapiens	2	26	4	29.3	106.87	944	0	279.19	29.3	304730000	304730000	0.412607	39			540
Q5JP53;P07437;Q5ST81;G3V2A3;G3V5W4;G3V2R8;G3V3R4;G3V2N6	Tubulin beta chain	TUBB	tr|Q5JP53|Q5JP53_HUMAN Tubulin beta chain OS=Homo sapiens OX=9606 GN=TUBB PE=1 SV=1;sp|P07437|TBB5_HUMAN Tubulin beta chain OS=Homo sapiens OX=9606 GN=TUBB PE=1 SV=2;tr|Q5ST81|Q5ST81_HUMAN Tubulin beta chain OS=Homo sapiens OX=9606 GN=TUBB PE=1 SV=1	Homo sapiens	8	24	5	61.3	47.766	426	0	139.63	61.3	279840000	279840000	0.378905	25			353
Q5VTE0;P68104;A0A087WVQ9;A0A2U3TZH3;Q05639;A0A087WV01;A0A2R8Y660;A0A2R8Y488;Q5JR01;A0A6Q8PFK6;A6PW80;A0A2R8YDN5	Putative elongation factor 1-alpha-like 3;Elongation factor 1-alpha 1;Elongation factor 1-alpha 2;Elongation factor 1-alpha	EEF1A1P5;EEF1A1;EEF1A2	sp|Q5VTE0|EF1A3_HUMAN Putative elongation factor 1-alpha-like 3 OS=Homo sapiens OX=9606 GN=EEF1A1P5 PE=5 SV=1;sp|P68104|EF1A1_HUMAN Elongation factor 1-alpha 1 OS=Homo sapiens OX=9606 GN=EEF1A1 PE=1 SV=1;tr|A0A087WVQ9|A0A087WVQ9_HUMAN Elongation factor 1-a	Homo sapiens	12	10	10	33.5	50.184	462	0	188.7	33.5	274450000	274450000	0.371607	27			493
P05067;A0A0A0MRG2;E9PG40;H7C0V9;H7C2L2	Amyloid beta A4 protein;N-APP;Soluble APP-alpha;Soluble APP-beta;C99;Beta-amyloid protein 42;Beta-amyloid protein 40;C83;P3(42);P3(40);C80;Gamma-secretase C-terminal fragment 59;Gamma-secretase C-terminal fragment 57;Gamma-secretase C-terminal fragment 50;C31	APP	sp|P05067|A4_HUMAN Amyloid-beta precursor protein OS=Homo sapiens OX=9606 GN=APP PE=1 SV=3;tr|A0A0A0MRG2|A0A0A0MRG2_HUMAN ABPP OS=Homo sapiens OX=9606 GN=APP PE=1 SV=1;tr|E9PG40|E9PG40_HUMAN ABPP OS=Homo sapiens OX=9606 GN=APP PE=1 SV=1;tr|H7C0V9|H7C0V9_HU	Homo sapiens	5	21	21	31.4	86.942	770	0	214.34	31.4	265160000	265160000	0.359029	30			344
B2R5W2;G3V4C1;G3V4W0;B4DY08;G3V2D6;G3V5V7;G3V5X6;G3V3K6;G3V251;B4DSU6;G3V4M8;G3V2H6;A0A0G2JPF8;A0A0G2JNQ3;P0DMR1;O60812;B7ZW38;B2RXH8		HNRNPC	tr|B2R5W2|B2R5W2_HUMAN Heterogeneous nuclear ribonucleoproteins C1/C2 OS=Homo sapiens OX=9606 GN=HNRNPC PE=1 SV=1;tr|G3V4C1|G3V4C1_HUMAN Heterogeneous nuclear ribonucleoproteins C1/C2 OS=Homo sapiens OX=9606 GN=HNRNPC PE=1 SV=1;tr|G3V4W0|G3V4W0_HUMAN Heter	Homo sapiens	18	14	1	61	31.948	290	0	177.61	61	257170000	257170000	0.34821	40			110
P46821;D6RA32;D6RA40;D6RCL2;D6RGJ3	Microtubule-associated protein 1B;MAP1B heavy chain;MAP1 light chain LC1	MAP1B	sp|P46821|MAP1B_HUMAN Microtubule-associated protein 1B OS=Homo sapiens OX=9606 GN=MAP1B PE=1 SV=2	Homo sapiens	5	40	40	26.3	270.63	2468	0	323.31	26.3	239770000	239770000	0.32465	63			443
P26641	Elongation factor 1-gamma	EEF1G	sp|P26641|EF1G_HUMAN Elongation factor 1-gamma OS=Homo sapiens OX=9606 GN=EEF1G PE=1 SV=3	Homo sapiens	1	11	11	24.9	50.118	437	0	78.233	24.9	224310000	224310000	0.303717	18			409
P14543	Nidogen-1	NID1	sp|P14543|NID1_HUMAN Nidogen-1 OS=Homo sapiens OX=9606 GN=NID1 PE=1 SV=3	Homo sapiens	1	29	29	35.7	136.38	1247	0	252.74	35.7	224230000	224230000	0.303609	46			382
Q07021;I3L3Q7;I3L3B0	Complement component 1 Q subcomponent-binding protein, mitochondrial	C1QBP	sp|Q07021|C1QBP_HUMAN Complement component 1 Q subcomponent-binding protein, mitochondrial OS=Homo sapiens OX=9606 GN=C1QBP PE=1 SV=1;tr|I3L3Q7|I3L3Q7_HUMAN Complement component 1 Q subcomponent-binding protein, mitochondrial (Fragment) OS=Homo sapiens OX=	Homo sapiens	3	6	6	32.3	31.362	282	0	58.553	32.3	220350000	220350000	0.298355	16			508
E9PK01;P29692;E9PRY8;A0A087X1X7;E9PQ49;E9PI39;E9PQZ1;E9PPR1;E9PL12;E9PL71;E9PMW7;H0YE72;E9PIZ1;H0YCK7;E9PN91;H0YE58;E9PK06;E9PK72;E9PQC9;E9PKK3;E9PNW6;E9PJD0	Elongation factor 1-delta	EEF1D	tr|E9PK01|E9PK01_HUMAN Elongation factor 1-delta (Fragment) OS=Homo sapiens OX=9606 GN=EEF1D PE=1 SV=1;sp|P29692|EF1D_HUMAN Elongation factor 1-delta OS=Homo sapiens OX=9606 GN=EEF1D PE=1 SV=5;tr|E9PRY8|E9PRY8_HUMAN Elongation factor 1-delta OS=Homo sapien	Homo sapiens	22	15	13	75.1	28.821	261	0	158.78	75.1	213740000	213740000	0.289405	25			181
P31946;Q4VY20;Q4VY19;A0A0J9YWE8;A0A0J9YWZ2	14-3-3 protein beta/alpha;14-3-3 protein beta/alpha, N-terminally processed	YWHAB	sp|P31946|1433B_HUMAN 14-3-3 protein beta/alpha OS=Homo sapiens OX=9606 GN=YWHAB PE=1 SV=3	Homo sapiens	5	15	10	69.5	28.082	246	0	183.85	69.5	206450000	206450000	0.279535	20			419
Q32MZ4;C9JTC6	Leucine-rich repeat flightless-interacting protein 1	LRRFIP1	sp|Q32MZ4|LRRF1_HUMAN Leucine-rich repeat flightless-interacting protein 1 OS=Homo sapiens OX=9606 GN=LRRFIP1 PE=1 SV=2	Homo sapiens	2	20	20	39.5	89.252	808	0	193.33	39.5	200630000	200630000	0.271654	38			561
Q13263;M0R0K9;M0R2I3;M0R3C0	Transcription intermediary factor 1-beta	TRIM28	sp|Q13263|TIF1B_HUMAN Transcription intermediary factor 1-beta OS=Homo sapiens OX=9606 GN=TRIM28 PE=1 SV=5;tr|M0R0K9|M0R0K9_HUMAN Transcription intermediary factor 1-beta (Fragment) OS=Homo sapiens OX=9606 GN=TRIM28 PE=1 SV=1	Homo sapiens	4	16	16	45.9	88.549	835	0	104.29	45.9	196670000	196670000	0.266293	43			524
Q16576;E9PC52;Q5JP01;Q5JP02;C9J7L0;Q5JNZ6	Histone-binding protein RBBP7	RBBP7	sp|Q16576|RBBP7_HUMAN Histone-binding protein RBBP7 OS=Homo sapiens OX=9606 GN=RBBP7 PE=1 SV=1;tr|E9PC52|E9PC52_HUMAN Histone-binding protein RBBP7 OS=Homo sapiens OX=9606 GN=RBBP7 PE=1 SV=1;tr|Q5JP01|Q5JP01_HUMAN Histone-binding protein RBBP7 (Fragment) O	Homo sapiens	6	14	11	62.1	47.82	425	0	50.076	62.1	188460000	188460000	0.255176	37			559
Q99613;B5ME19;H3BPE3;H3BPE4;H3BTY8	Eukaryotic translation initiation factor 3 subunit C;Eukaryotic translation initiation factor 3 subunit C-like protein	EIF3C;EIF3CL	sp|Q99613|EIF3C_HUMAN Eukaryotic translation initiation factor 3 subunit C OS=Homo sapiens OX=9606 GN=EIF3C PE=1 SV=1;sp|B5ME19|EIFCL_HUMAN Eukaryotic translation initiation factor 3 subunit C-like protein OS=Homo sapiens OX=9606 GN=EIF3CL PE=1 SV=1	Homo sapiens	5	19	19	22.5	105.34	913	0	315.19	22.5	185800000	185800000	0.251575	32			615
O15355	Protein phosphatase 1G	PPM1G	sp|O15355|PPM1G_HUMAN Protein phosphatase 1G OS=Homo sapiens OX=9606 GN=PPM1G PE=1 SV=1	Homo sapiens	1	13	13	44.3	59.271	546	0	139.96	44.3	182270000	182270000	0.246795	30			306
Q04837;A0A0G2JLD8;E7EUY5;C9K0U8	Single-stranded DNA-binding protein, mitochondrial	SSBP1	sp|Q04837|SSBP_HUMAN Single-stranded DNA-binding protein, mitochondrial OS=Homo sapiens OX=9606 GN=SSBP1 PE=1 SV=1;tr|A0A0G2JLD8|A0A0G2JLD8_HUMAN Single-stranded DNA-binding protein, mitochondrial (Fragment) OS=Homo sapiens OX=9606 GN=SSBP1 PE=1 SV=1;tr|E7	Homo sapiens	4	10	10	70.3	17.259	148	0	87.908	70.3	177130000	177130000	0.239835	16			506
O75821;K7EL20;K7ER90;K7ENA8;K7EP16;K7EL60;K7ENH0	Eukaryotic translation initiation factor 3 subunit G	EIF3G	sp|O75821|EIF3G_HUMAN Eukaryotic translation initiation factor 3 subunit G OS=Homo sapiens OX=9606 GN=EIF3G PE=1 SV=2;tr|K7EL20|K7EL20_HUMAN Eukaryotic translation initiation factor 3 subunit G (Fragment) OS=Homo sapiens OX=9606 GN=EIF3G PE=1 SV=8;tr|K7ER9	Homo sapiens	7	17	17	65.6	35.611	320	0	323.31	65.6	176120000	176120000	0.238468	29			328
Q14152	Eukaryotic translation initiation factor 3 subunit A	EIF3A	sp|Q14152|EIF3A_HUMAN Eukaryotic translation initiation factor 3 subunit A OS=Homo sapiens OX=9606 GN=EIF3A PE=1 SV=1	Homo sapiens	1	26	26	24.2	166.57	1382	0	142	24.2	169650000	169650000	0.229707	40			533
Q7Z6Z7;H0Y659;A0A087X146;A5YM72	E3 ubiquitin-protein ligase HUWE1	HUWE1	sp|Q7Z6Z7|HUWE1_HUMAN E3 ubiquitin-protein ligase HUWE1 OS=Homo sapiens OX=9606 GN=HUWE1 PE=1 SV=3	Homo sapiens	4	33	32	12.6	481.89	4374	0	323.31	12.6	167540000	167540000	0.22685	48			582
O75822;H0YGJ7;H0YLP3	Eukaryotic translation initiation factor 3 subunit J	EIF3J	sp|O75822|EIF3J_HUMAN Eukaryotic translation initiation factor 3 subunit J OS=Homo sapiens OX=9606 GN=EIF3J PE=1 SV=2	Homo sapiens	3	10	10	48.4	29.062	258	0	106.43	48.4	152540000	152540000	0.20654	19			329
E5RGV5;E5RG67;F8W8I6;P31483	Nucleolysin TIA-1 isoform p40	TIA1	tr|E5RGV5|E5RGV5_HUMAN Nucleolysin TIA-1 isoform p40 OS=Homo sapiens OX=9606 GN=TIA1 PE=1 SV=1;tr|E5RG67|E5RG67_HUMAN Nucleolysin TIA-1 isoform p40 OS=Homo sapiens OX=9606 GN=TIA1 PE=1 SV=1;tr|F8W8I6|F8W8I6_HUMAN Nucleolysin TIA-1 isoform p40 OS=Homo sapie	Homo sapiens	4	1	1	9	15.821	144	0.0016447	1.9215	9	145630000	145630000	0.197184	4			154
P67809;H0Y449;C9J5V9;Q9Y2T7	Nuclease-sensitive element-binding protein 1	YBX1	sp|P67809|YBOX1_HUMAN Y-box-binding protein 1 OS=Homo sapiens OX=9606 GN=YBX1 PE=1 SV=3;tr|H0Y449|H0Y449_HUMAN Y-box-binding protein 1 (Fragment) OS=Homo sapiens OX=9606 GN=YBX1 PE=1 SV=1	Homo sapiens	4	9	5	50	35.924	324	0	116.38	50	140820000	140820000	0.190671	12			490
Q04917;A2IDB2;F8WEB6;A2IDB1	14-3-3 protein eta	YWHAH	sp|Q04917|1433F_HUMAN 14-3-3 protein eta OS=Homo sapiens OX=9606 GN=YWHAH PE=1 SV=4	Homo sapiens	4	14	11	56.5	28.218	246	0	113.69	56.5	128740000	128740000	0.174315	14			507
A0A0U1RQF0;P49327;A0A0U1RRG3	Fatty acid synthase;[Acyl-carrier-protein] S-acetyltransferase;[Acyl-carrier-protein] S-malonyltransferase;3-oxoacyl-[acyl-carrier-protein] synthase;3-oxoacyl-[acyl-carrier-protein] reductase;3-hydroxyacyl-[acyl-carrier-protein] dehydratase;Enoyl-[acyl-carrier-protein] reductase;Oleoyl-[acyl-carrier-protein] hydrolase	FASN	tr|A0A0U1RQF0|A0A0U1RQF0_HUMAN 3-hydroxyacyl-[acyl-carrier-protein] dehydratase OS=Homo sapiens OX=9606 GN=FASN PE=1 SV=1;sp|P49327|FAS_HUMAN Fatty acid synthase OS=Homo sapiens OX=9606 GN=FASN PE=1 SV=3	Homo sapiens	3	29	29	19.3	273.2	2509	0	316.24	19.3	127370000	127370000	0.17246	43			59
B8ZZQ6;P06454	Prothymosin alpha;Prothymosin alpha, N-terminally processed;Thymosin alpha-1	PTMA	tr|B8ZZQ6|B8ZZQ6_HUMAN Prothymosin alpha OS=Homo sapiens OX=9606 GN=PTMA PE=1 SV=1;sp|P06454|PTMA_HUMAN Prothymosin alpha OS=Homo sapiens OX=9606 GN=PTMA PE=1 SV=2	Homo sapiens	2	2	2	15.9	11.758	107	0	29.342	15.9	121770000	121770000	0.164877	5			122
Q9Y230;M0R0Y3;X6R2L4;M0QXI6;M0R0Z0;M0QXZ7;A0A1W2PS48	RuvB-like 2	RUVBL2	sp|Q9Y230|RUVB2_HUMAN RuvB-like 2 OS=Homo sapiens OX=9606 GN=RUVBL2 PE=1 SV=3;tr|M0R0Y3|M0R0Y3_HUMAN RuvB-like helicase OS=Homo sapiens OX=9606 GN=RUVBL2 PE=1 SV=1	Homo sapiens	7	13	13	32	51.156	463	0	110.01	32	113610000	113610000	0.153829	14			652
O14744;G3V580;G3V2L6;G3V2X6;C9JSX3;G3V5L5;H0YJX6;G3V507;G3V2F5;H0YJ77;H0YJD3;H7BZ44	Protein arginine N-methyltransferase 5;Protein arginine N-methyltransferase 5, N-terminally processed	PRMT5	sp|O14744|ANM5_HUMAN Protein arginine N-methyltransferase 5 OS=Homo sapiens OX=9606 GN=PRMT5 PE=1 SV=4;tr|G3V580|G3V580_HUMAN Protein arginine N-methyltransferase 5 (Fragment) OS=Homo sapiens OX=9606 GN=PRMT5 PE=1 SV=1	Homo sapiens	12	17	17	32.5	72.683	637	0	87.031	32.5	113490000	113490000	0.153666	25			303
Q58FF8	Putative heat shock protein HSP 90-beta 2	HSP90AB2P	sp|Q58FF8|H90B2_HUMAN Putative heat shock protein HSP 90-beta 2 OS=Homo sapiens OX=9606 GN=HSP90AB2P PE=1 SV=2	Homo sapiens	1	12	1	28.6	44.348	381	0	83.145	28.6	105260000	105260000	0.142523	3			564
P13667;A0A499FI48	Protein disulfide-isomerase A4	PDIA4	sp|P13667|PDIA4_HUMAN Protein disulfide-isomerase A4 OS=Homo sapiens OX=9606 GN=PDIA4 PE=1 SV=2;tr|A0A499FI48|A0A499FI48_HUMAN Protein disulfide-isomerase OS=Homo sapiens OX=9606 GN=PDIA4 PE=1 SV=1	Homo sapiens	2	14	14	28.8	72.932	645	0	46.269	28.8	99896000	99896000	0.13526	22			379
P61978;Q5T6W2;S4R359	Heterogeneous nuclear ribonucleoprotein K	HNRNPK	sp|P61978|HNRPK_HUMAN Heterogeneous nuclear ribonucleoprotein K OS=Homo sapiens OX=9606 GN=HNRNPK PE=1 SV=1;tr|Q5T6W2|Q5T6W2_HUMAN Heterogeneous nuclear ribonucleoprotein K (Fragment) OS=Homo sapiens OX=9606 GN=HNRNPK PE=1 SV=1	Homo sapiens	3	9	9	28.1	50.976	463	0	91.37	28.1	99336000	99336000	0.134502	16			472
E7EX73;E9PGM1;E7EUU4;Q04637;C9JF13;C9J6B6;C9J2Z7;C9K073;A0A6Q8PFB2;H7C044;F8WCF2;C9JHW9;H7C0V6;A0A0A0MSA7;A0A0U1RQK7;O43432;C9JWH7;C9J556;C9JSU8;C9JWW9	Eukaryotic translation initiation factor 4 gamma 1	EIF4G1	tr|E7EX73|E7EX73_HUMAN Eukaryotic translation initiation factor 4 gamma 1 OS=Homo sapiens OX=9606 GN=EIF4G1 PE=1 SV=1;tr|E9PGM1|E9PGM1_HUMAN Eukaryotic translation initiation factor 4 gamma 1 OS=Homo sapiens OX=9606 GN=EIF4G1 PE=1 SV=1;tr|E7EUU4|E7EUU4_HUM	Homo sapiens	20	16	16	15.9	158.64	1436	0	170.71	15.9	96445000	96445000	0.130587	29			168
P12270;Q5SWX9	Nucleoprotein TPR	TPR	sp|P12270|TPR_HUMAN Nucleoprotein TPR OS=Homo sapiens OX=9606 GN=TPR PE=1 SV=3	Homo sapiens	2	26	26	16	267.29	2363	0	214.25	16	95519000	95519000	0.129333	40			373
P13639	Elongation factor 2	EEF2	sp|P13639|EF2_HUMAN Elongation factor 2 OS=Homo sapiens OX=9606 GN=EEF2 PE=1 SV=4	Homo sapiens	1	19	19	31.5	95.337	858	0	74.192	31.5	95240000	95240000	0.128956	32			378
P27348;E9PG15	14-3-3 protein theta	YWHAQ	sp|P27348|1433T_HUMAN 14-3-3 protein theta OS=Homo sapiens OX=9606 GN=YWHAQ PE=1 SV=1;tr|E9PG15|E9PG15_HUMAN 14-3-3 protein theta (Fragment) OS=Homo sapiens OX=9606 GN=YWHAQ PE=1 SV=1	Homo sapiens	2	15	12	53.5	27.764	245	0	310.53	53.5	94536000	94536000	0.128002	25			410
P14866;M0QXS5;A0A3B3ITJ4;M0QYT0;B4DVF8;M0R1W6;M0R076	Heterogeneous nuclear ribonucleoprotein L	HNRNPL	sp|P14866|HNRPL_HUMAN Heterogeneous nuclear ribonucleoprotein L OS=Homo sapiens OX=9606 GN=HNRNPL PE=1 SV=2;tr|M0QXS5|M0QXS5_HUMAN Heterogeneous nuclear ribonucleoprotein L (Fragment) OS=Homo sapiens OX=9606 GN=HNRNPL PE=1 SV=1;tr|A0A3B3ITJ4|A0A3B3ITJ4_HUM	Homo sapiens	7	13	13	43	64.132	589	0	57.359	43	94364000	94364000	0.12777	18			385
A0A1X7SBZ2;A0A5H1ZRQ2;Q92841;J3KRZ1;A0A0U1RQJ0;J3QSF1	Probable ATP-dependent RNA helicase DDX17	DDX17	tr|A0A1X7SBZ2|A0A1X7SBZ2_HUMAN RNA helicase OS=Homo sapiens OX=9606 GN=DDX17 PE=1 SV=1;tr|A0A5H1ZRQ2|A0A5H1ZRQ2_HUMAN RNA helicase OS=Homo sapiens OX=9606 GN=DDX17 PE=1 SV=1;sp|Q92841|DDX17_HUMAN Probable ATP-dependent RNA helicase DDX17 OS=Homo sapiens OX	Homo sapiens	6	15	10	22.5	80.253	729	0	257.42	22.5	91834000	91834000	0.124344	24			66
C9JIF9;P13798;H7C393;C9JLK2;H7C1U0;F8WEH5	Acylamino-acid-releasing enzyme	APEH	tr|C9JIF9|C9JIF9_HUMAN Acyl-peptide hydrolase OS=Homo sapiens OX=9606 GN=APEH PE=1 SV=1;sp|P13798|ACPH_HUMAN Acylamino-acid-releasing enzyme OS=Homo sapiens OX=9606 GN=APEH PE=1 SV=4;tr|H7C393|H7C393_HUMAN Acylamino-acid-releasing enzyme (Fragment) OS=Homo	Homo sapiens	6	11	11	23.9	81.673	737	0	139.21	23.9	87903000	87903000	0.119021	23			133
Q16643;D6R9W4;D6R9Q9;D6RCR4;D6RFI1	Drebrin	DBN1	sp|Q16643|DREB_HUMAN Drebrin OS=Homo sapiens OX=9606 GN=DBN1 PE=1 SV=4;tr|D6R9W4|D6R9W4_HUMAN Drebrin (Fragment) OS=Homo sapiens OX=9606 GN=DBN1 PE=1 SV=1	Homo sapiens	5	13	13	35.7	71.428	649	0	91.885	35.7	87045000	87045000	0.11786	22			560
P24534;C9JZW3;F2Z2G2;F8WF65	Elongation factor 1-beta	EEF1B2	sp|P24534|EF1B_HUMAN Elongation factor 1-beta OS=Homo sapiens OX=9606 GN=EEF1B2 PE=1 SV=3;tr|C9JZW3|C9JZW3_HUMAN Elongation factor 1-beta (Fragment) OS=Homo sapiens OX=9606 GN=EEF1B2 PE=1 SV=1	Homo sapiens	4	10	8	60	24.763	225	0	197.95	60	86814000	86814000	0.117547	20			402
V9GYY3;A0A384N5Y3;F5H2F4;P11586;V9GZ78;A0A494C1T2	C-1-tetrahydrofolate synthase, cytoplasmic;Methylenetetrahydrofolate dehydrogenase;Methenyltetrahydrofolate cyclohydrolase;Formyltetrahydrofolate synthetase;C-1-tetrahydrofolate synthase, cytoplasmic, N-terminally processed	MTHFD1	tr|V9GYY3|V9GYY3_HUMAN C-1-tetrahydrofolate synthase, cytoplasmic OS=Homo sapiens OX=9606 GN=MTHFD1 PE=1 SV=2;tr|A0A384N5Y3|A0A384N5Y3_HUMAN C-1-tetrahydrofolate synthase, cytoplasmic OS=Homo sapiens OX=9606 GN=MTHFD1 PE=1 SV=1;tr|F5H2F4|F5H2F4_HUMAN C-1-t	Homo sapiens	6	20	20	28.3	99.719	922	0	160.86	28.3	85092000	85092000	0.115215	24			77
Q8TEX9;H0YN07;H0YMR4;H0YN14;H0YK93;H0YLV0;H0YL92;H0YKG5	Importin-4	IPO4	sp|Q8TEX9|IPO4_HUMAN Importin-4 OS=Homo sapiens OX=9606 GN=IPO4 PE=1 SV=2;tr|H0YN07|H0YN07_HUMAN Importin-4 (Fragment) OS=Homo sapiens OX=9606 GN=IPO4 PE=1 SV=1;tr|H0YMR4|H0YMR4_HUMAN Importin-4 (Fragment) OS=Homo sapiens OX=9606 GN=IPO4 PE=1 SV=1;tr|H0YN1	Homo sapiens	8	3	3	2.7	118.71	1081	0	15.889	2.7	83683000	83683000	0.113307	4			592
P61981	14-3-3 protein gamma;14-3-3 protein gamma, N-terminally processed	YWHAG	sp|P61981|1433G_HUMAN 14-3-3 protein gamma OS=Homo sapiens OX=9606 GN=YWHAG PE=1 SV=2	Homo sapiens	1	15	11	69.6	28.302	247	0	101.29	69.6	83445000	83445000	0.112985	25			473
A0A286YF22;A0A2C9F2M7;O43175;A0A286YFA2;A0A286YFL2;A0A286YFM8;A0A286YF78;A0A286YER3;A0A286YFC8;A0A286YFB2;A0A286YFF3;A0A286YF34;A0A286YFK5;A0A286YFE1	D-3-phosphoglycerate dehydrogenase	PHGDH	tr|A0A286YF22|A0A286YF22_HUMAN D-3-phosphoglycerate dehydrogenase OS=Homo sapiens OX=9606 GN=PHGDH PE=1 SV=1;tr|A0A2C9F2M7|A0A2C9F2M7_HUMAN D-3-phosphoglycerate dehydrogenase OS=Homo sapiens OX=9606 GN=PHGDH PE=1 SV=1;sp|O43175|SERA_HUMAN D-3-phosphoglycer	Homo sapiens	14	12	12	25.5	55.938	526	0	102.73	25.5	82473000	82473000	0.111669	20			67
Q13283;E5RI46;E5RIF8;E5RH42;E5RIZ6;E5RJU8;E5RH00;D6R9X5;D6R9A4;D6RBM9;D6REX8;D6RBR0;D6RE13;D6RBW8;D6RGJ4;D6RAC7;D6RB17	Ras GTPase-activating protein-binding protein 1	G3BP1	sp|Q13283|G3BP1_HUMAN Ras GTPase-activating protein-binding protein 1 OS=Homo sapiens OX=9606 GN=G3BP1 PE=1 SV=1	Homo sapiens	17	8	7	26.6	52.164	466	0	67.69	26.6	81270000	81270000	0.11004	16			525
P60842;J3KT12;J3QLN6;J3QR64;J3KTB5;J3QL43;J3QS69;J3QKZ9;J3KS25;E7EQG2;Q14240;J3KSZ0;J3KT04;J3KS93;E7EMV8;J3KSN7;J3QL52;J3QQP0;E9PBH4;F8WE11;J3KTN0	Eukaryotic initiation factor 4A-I;Eukaryotic initiation factor 4A-II;Eukaryotic initiation factor 4A-II, N-terminally processed	EIF4A1;EIF4A2	sp|P60842|IF4A1_HUMAN Eukaryotic initiation factor 4A-I OS=Homo sapiens OX=9606 GN=EIF4A1 PE=1 SV=1;tr|J3KT12|J3KT12_HUMAN RNA helicase OS=Homo sapiens OX=9606 GN=EIF4A1 PE=1 SV=1;tr|J3QLN6|J3QLN6_HUMAN RNA helicase (Fragment) OS=Homo sapiens OX=9606 GN=EI	Homo sapiens	21	10	9	28.3	46.153	406	0	112.94	28.3	81059000	81059000	0.109754	12			468
O00267;M0QYL9;M0R105;M0R2M5	Transcription elongation factor SPT5	SUPT5H	sp|O00267|SPT5H_HUMAN Transcription elongation factor SPT5 OS=Homo sapiens OX=9606 GN=SUPT5H PE=1 SV=1	Homo sapiens	4	18	18	28.5	121	1087	0	158.99	28.5	80980000	80980000	0.109647	29			297
A0A0R4J2E8;A8MXP9;P43243;D6REM6;D6R991;H0Y8T4;B3KM87;D6RB45;A0A1B0GX04;D6R9F3;D6RBS2;D6RCM3;D6REK4;D6R8Z5	Matrin-3	MATR3	tr|A0A0R4J2E8|A0A0R4J2E8_HUMAN Matrin-3 OS=Homo sapiens OX=9606 GN=MATR3 PE=1 SV=1;tr|A8MXP9|A8MXP9_HUMAN Matrin-3 OS=Homo sapiens OX=9606 GN=MATR3 PE=1 SV=1;sp|P43243|MATR3_HUMAN Matrin-3 OS=Homo sapiens OX=9606 GN=MATR3 PE=1 SV=2;tr|D6REM6|D6REM6_HUMAN M	Homo sapiens	14	16	16	27.6	94.622	847	0	149.63	27.6	79138000	79138000	0.107153	20			57
P11021	78 kDa glucose-regulated protein	HSPA5	sp|P11021|BIP_HUMAN Endoplasmic reticulum chaperone BiP OS=Homo sapiens OX=9606 GN=HSPA5 PE=1 SV=2	Homo sapiens	1	19	19	40.2	72.332	654	0	143.38	40.2	77947000	77947000	0.105541	28			369
Q09028;H0YCT5;H0YF10;H0YDK2;H0YEU5;E9PNS2;E9PIC4;C9JPP3;E9PNS6	Histone-binding protein RBBP4	RBBP4	sp|Q09028|RBBP4_HUMAN Histone-binding protein RBBP4 OS=Homo sapiens OX=9606 GN=RBBP4 PE=1 SV=3	Homo sapiens	9	9	6	34.8	47.655	425	0	25.401	34.8	76939000	76939000	0.104176	11			512
Q13347;Q5TFK1	Eukaryotic translation initiation factor 3 subunit I	EIF3I	sp|Q13347|EIF3I_HUMAN Eukaryotic translation initiation factor 3 subunit I OS=Homo sapiens OX=9606 GN=EIF3I PE=1 SV=1	Homo sapiens	2	9	9	52	36.501	325	0	61.522	52	75607000	75607000	0.102372	20			526
F8VY35;F5H4R6;H0YIV4;P55209;F8W118;F8VV59;F8W0J6;H0YH88;H0YHC3;F8W020;F8W543;B7Z9C2;F8VUX1;F8VXI6;F8VRJ2;F8VVB5;B7Z4K9	Nucleosome assembly protein 1-like 1	NAP1L1	tr|F8VY35|F8VY35_HUMAN Nucleosome assembly protein 1-like 1 (Fragment) OS=Homo sapiens OX=9606 GN=NAP1L1 PE=1 SV=1;tr|F5H4R6|F5H4R6_HUMAN Nucleosome assembly protein 1-like 1 OS=Homo sapiens OX=9606 GN=NAP1L1 PE=1 SV=1;tr|H0YIV4|H0YIV4_HUMAN Nucleosome ass	Homo sapiens	17	10	9	57.2	31.02	264	0	65.701	57.2	70758000	70758000	0.0958068	19			201
E7EV71;Q14766;C9JD84;H7BZ76;H7C0I7;C9JDW2;H7C4L5	Latent-transforming growth factor beta-binding protein 1	LTBP1	tr|E7EV71|E7EV71_HUMAN Latent-transforming growth factor beta-binding protein 1 OS=Homo sapiens OX=9606 GN=LTBP1 PE=1 SV=2;sp|Q14766|LTBP1_HUMAN Latent-transforming growth factor beta-binding protein 1 OS=Homo sapiens OX=9606 GN=LTBP1 PE=1 SV=4;tr|C9JD84|C	Homo sapiens	7	13	13	16.5	148.43	1353	0	140.49	16.5	70078000	70078000	0.0948861	20			169
K7EM02;K7EIJ8;Q8IYT4	Katanin p60 ATPase-containing subunit A-like 2	KATNAL2	tr|K7EM02|K7EM02_HUMAN Katanin p60 ATPase-containing subunit A-like 2 (Fragment) OS=Homo sapiens OX=9606 GN=KATNAL2 PE=1 SV=1;tr|K7EIJ8|K7EIJ8_HUMAN Katanin p60 ATPase-containing subunit A-like 2 (Fragment) OS=Homo sapiens OX=9606 GN=KATNAL2 PE=1 SV=1;sp|Q	Homo sapiens	3	1	1	9.4	13.999	128	0.0017182	2.2436	9.4	68956000	68956000	0.0933669	1			255
O60763	General vesicular transport factor p115	USO1	sp|O60763|USO1_HUMAN General vesicular transport factor p115 OS=Homo sapiens OX=9606 GN=USO1 PE=1 SV=2	Homo sapiens	1	13	13	23.5	107.89	962	0	96.393	23.5	67739000	67739000	0.0917191	21			320
Q3ZCM7;A0A075B736;Q5SQY0	Tubulin beta-8 chain	TUBB8	sp|Q3ZCM7|TBB8_HUMAN Tubulin beta-8 chain OS=Homo sapiens OX=9606 GN=TUBB8 PE=1 SV=2;tr|A0A075B736|A0A075B736_HUMAN Tubulin beta chain OS=Homo sapiens OX=9606 GN=TUBB8 PE=1 SV=1;tr|Q5SQY0|Q5SQY0_HUMAN Tubulin beta chain OS=Homo sapiens OX=9606 GN=TUBB8 PE=	Homo sapiens	3	7	2	21.2	49.775	444	0	3.0537	21.2	67394000	67394000	0.091252	4			562
A0A087WYT3;Q15185;B4DDC6	Prostaglandin E synthase 3	PTGES3	tr|A0A087WYT3|A0A087WYT3_HUMAN Prostaglandin E synthase 3 OS=Homo sapiens OX=9606 GN=PTGES3 PE=1 SV=1;sp|Q15185|TEBP_HUMAN Prostaglandin E synthase 3 OS=Homo sapiens OX=9606 GN=PTGES3 PE=1 SV=1	Homo sapiens	3	5	5	32.3	19.155	164	0	16.733	32.3	63915000	63915000	0.0865414	10			23
P43487;F6WQW2;C9JXG8;C9JJ34;C9JDM3;C9JGV6;C9JIC6;Q5T0Z6;Q9C010	Ran-specific GTPase-activating protein	RANBP1	sp|P43487|RANG_HUMAN Ran-specific GTPase-activating protein OS=Homo sapiens OX=9606 GN=RANBP1 PE=1 SV=1;tr|F6WQW2|F6WQW2_HUMAN Ran-specific GTPase-activating protein OS=Homo sapiens OX=9606 GN=RANBP1 PE=1 SV=1;tr|C9JXG8|C9JXG8_HUMAN Ran-specific GTPase-act	Homo sapiens	9	6	6	44.8	23.31	201	0	25.923	44.8	63576000	63576000	0.0860824	9			439
Q8NBJ4;C9J941;F8WAT9;C9JYM4	Golgi membrane protein 1	GOLM1	sp|Q8NBJ4|GOLM1_HUMAN Golgi membrane protein 1 OS=Homo sapiens OX=9606 GN=GOLM1 PE=1 SV=1	Homo sapiens	4	10	10	31.2	45.333	401	0	308.71	31.2	62664000	62664000	0.0848475	17			589
P23396;E9PL09;F2Z2S8;H0YF32;H0YCJ7;E9PPU1;H0YEU2;E9PQ96;E9PJH4;E9PK82;E9PSF4;H0YES8;E9PQX2	40S ribosomal protein S3	RPS3	sp|P23396|RS3_HUMAN 40S ribosomal protein S3 OS=Homo sapiens OX=9606 GN=RPS3 PE=1 SV=2;tr|E9PL09|E9PL09_HUMAN 40S ribosomal protein S3 OS=Homo sapiens OX=9606 GN=RPS3 PE=1 SV=1;tr|F2Z2S8|F2Z2S8_HUMAN 40S ribosomal protein S3 OS=Homo sapiens OX=9606 GN=RPS3	Homo sapiens	13	10	10	48.6	26.688	243	0	20.621	48.6	58752000	58752000	0.0795506	12			401
A0A1W2PPS1;Q00839;A0A1W2PP35;Q5RI18;A0A1X7SBS1;A0A1W2PRZ7;A0A1W2PQ74;A0A1W2PQL0;A0A1W2PP34;A0A1W2PPL4;A0A1W2PPH7;A0A1W2PRI6;A0A1W2PQD4;A0A1W2PPE9;A0A1W2PP22	Heterogeneous nuclear ribonucleoprotein U	HNRNPU	tr|A0A1W2PPS1|A0A1W2PPS1_HUMAN Heterogeneous nuclear ribonucleoprotein U OS=Homo sapiens OX=9606 GN=HNRNPU PE=1 SV=1;sp|Q00839|HNRPU_HUMAN Heterogeneous nuclear ribonucleoprotein U OS=Homo sapiens OX=9606 GN=HNRNPU PE=1 SV=6;tr|A0A1W2PP35|A0A1W2PP35_HUMAN	Homo sapiens	15	9	9	15.7	88.317	804	0	99.319	15.7	56317000	56317000	0.0762536	12			65
F5H039;Q9NQX3;H0YJ30;H0YJR5	Gephyrin;Molybdopterin adenylyltransferase;Molybdopterin molybdenumtransferase	GPHN	tr|F5H039|F5H039_HUMAN Molybdopterin molybdenumtransferase OS=Homo sapiens OX=9606 GN=GPHN PE=1 SV=1;sp|Q9NQX3|GEPH_HUMAN Gephyrin OS=Homo sapiens OX=9606 GN=GPHN PE=1 SV=1;tr|H0YJ30|H0YJ30_HUMAN Molybdopterin molybdenumtransferase (Fragment) OS=Homo sapie	Homo sapiens	4	13	5	19.7	84.733	782	0	110.09	19.7	55829000	55829000	0.0755929	20			199
F5GXR3;P20962	Parathymosin	PTMS	tr|F5GXR3|F5GXR3_HUMAN Parathymosin OS=Homo sapiens OX=9606 GN=PTMS PE=1 SV=1;sp|P20962|PTMS_HUMAN Parathymosin OS=Homo sapiens OX=9606 GN=PTMS PE=1 SV=2	Homo sapiens	2	2	2	13.5	12.074	104	0	31.778	13.5	54802000	54802000	0.0742023	2			196
F8W1I6;Q13561;F8VW18;H0YI98;F8VRV7;F8VX93;F8W0U6;H0YHL1	Dynactin subunit 2	DCTN2	tr|F8W1I6|F8W1I6_HUMAN Dynactin subunit 2 OS=Homo sapiens OX=9606 GN=DCTN2 PE=1 SV=1;sp|Q13561|DCTN2_HUMAN Dynactin subunit 2 OS=Homo sapiens OX=9606 GN=DCTN2 PE=1 SV=4;tr|F8VW18|F8VW18_HUMAN Dynactin subunit 2 (Fragment) OS=Homo sapiens OX=9606 GN=DCTN2 P	Homo sapiens	8	8	8	28.6	34.258	315	0	65.702	28.6	54658000	54658000	0.0740073	10			209
P68133;P68032;A6NL76;P63267;P62736;F8WB63;B8ZZJ2;C9JFL5;F6UVQ4;F6QUT6	Actin, alpha skeletal muscle;Actin, alpha cardiac muscle 1;Actin, gamma-enteric smooth muscle;Actin, aortic smooth muscle	ACTA1;ACTC1;ACTG2;ACTA2	sp|P68133|ACTS_HUMAN Actin, alpha skeletal muscle OS=Homo sapiens OX=9606 GN=ACTA1 PE=1 SV=1;sp|P68032|ACTC_HUMAN Actin, alpha cardiac muscle 1 OS=Homo sapiens OX=9606 GN=ACTC1 PE=1 SV=1;tr|A6NL76|A6NL76_HUMAN Actin, alpha skeletal muscle OS=Homo sapiens O	Homo sapiens	10	10	4	22.5	42.051	377	0	10.542	22.5	54374000	54374000	0.0736228	5			492
P14618;B4DNK4;H3BTN5;H3BR70;H3BQ34;H3BT25;H3BUW1;H3BTJ2;H3BU13;P30613	Pyruvate kinase PKM;Pyruvate kinase	PKM	sp|P14618|KPYM_HUMAN Pyruvate kinase PKM OS=Homo sapiens OX=9606 GN=PKM PE=1 SV=4;tr|B4DNK4|B4DNK4_HUMAN Pyruvate kinase OS=Homo sapiens OX=9606 GN=PKM PE=1 SV=1;tr|H3BTN5|H3BTN5_HUMAN Pyruvate kinase (Fragment) OS=Homo sapiens OX=9606 GN=PKM PE=1 SV=1;tr|	Homo sapiens	10	14	14	38	57.936	531	0	130.35	38	54149000	54149000	0.0733181	21			383
O75643;A0A494C1A5	U5 small nuclear ribonucleoprotein 200 kDa helicase	SNRNP200	sp|O75643|U520_HUMAN U5 small nuclear ribonucleoprotein 200 kDa helicase OS=Homo sapiens OX=9606 GN=SNRNP200 PE=1 SV=2;tr|A0A494C1A5|A0A494C1A5_HUMAN U5 small nuclear ribonucleoprotein 200 kDa helicase (Fragment) OS=Homo sapiens OX=9606 GN=SNRNP200 PE=1 SV	Homo sapiens	2	16	16	10.5	244.5	2136	0	248.37	10.5	53643000	53643000	0.072633	24			325
Q8N163;G3V119;H0YB24;E5RHJ4;H0YC69;E5RGU7;E5RFJ3;H0YC58;A0A087X2B6	Cell cycle and apoptosis regulator protein 2	CCAR2	sp|Q8N163|CCAR2_HUMAN Cell cycle and apoptosis regulator protein 2 OS=Homo sapiens OX=9606 GN=CCAR2 PE=1 SV=2;tr|G3V119|G3V119_HUMAN Cell cycle and apoptosis regulator protein 2 OS=Homo sapiens OX=9606 GN=CCAR2 PE=1 SV=1;tr|H0YB24|H0YB24_HUMAN Cell cycle a	Homo sapiens	9	11	11	22.4	102.9	923	0	214.31	22.4	53629000	53629000	0.072614	17			585
P19338;H7BY16;C9JYW2;C9JLB1;C9J1H7;C9JWL1	Nucleolin	NCL	sp|P19338|NUCL_HUMAN Nucleolin OS=Homo sapiens OX=9606 GN=NCL PE=1 SV=3	Homo sapiens	6	13	13	24.6	76.613	710	0	87.13	24.6	52709000	52709000	0.0713684	20			393
P51858;H3BPQ6;M0R0J3;Q9Y3E1;O75475;Q7Z4V5	Hepatoma-derived growth factor	HDGF	sp|P51858|HDGF_HUMAN Hepatoma-derived growth factor OS=Homo sapiens OX=9606 GN=HDGF PE=1 SV=1	Homo sapiens	6	8	8	43.3	26.788	240	0	225.73	43.3	51049000	51049000	0.0691207	14			453
Q9Y265;E7ETR0;H7C4I3;H7C4G5;J3QLR1	RuvB-like 1	RUVBL1	sp|Q9Y265|RUVB1_HUMAN RuvB-like 1 OS=Homo sapiens OX=9606 GN=RUVBL1 PE=1 SV=1;tr|E7ETR0|E7ETR0_HUMAN RuvB-like helicase OS=Homo sapiens OX=9606 GN=RUVBL1 PE=1 SV=1	Homo sapiens	5	8	8	22.4	50.227	456	0	26.588	22.4	49081000	49081000	0.066456	11			653
P10909;H0YC35;E7ERK6;H0YLK8;H0YAS8;E7ETB4;E5RG36;E5RGB0;E5RH61;E5RJZ5	Clusterin;Clusterin beta chain;Clusterin alpha chain;Clusterin	CLU	sp|P10909|CLUS_HUMAN Clusterin OS=Homo sapiens OX=9606 GN=CLU PE=1 SV=1;tr|H0YC35|H0YC35_HUMAN Clusterin (Fragment) OS=Homo sapiens OX=9606 GN=CLU PE=1 SV=1;tr|E7ERK6|E7ERK6_HUMAN Clusterin (Fragment) OS=Homo sapiens OX=9606 GN=CLU PE=1 SV=1;tr|H0YLK8|H0YL	Homo sapiens	10	6	6	18.9	52.494	449	0	66.183	18.9	48826000	48826000	0.0661108	10			368
E9PCY7;G8JLB6;P31943;D6RIU0;D6RBM0;D6RFM3;D6RAM1;E5RGV0;D6R9T0;D6RIT2;E7EN40;D6RDU3;D6RJ04;D6RIH9;D6RDL0;E7EQJ0;H0YB39;D6RF17;E5RGH4;H0YBG7;H0YBD7;P55795;D6R9D3;H0YAQ2;P31942	Heterogeneous nuclear ribonucleoprotein H;Heterogeneous nuclear ribonucleoprotein H, N-terminally processed	HNRNPH1	tr|E9PCY7|E9PCY7_HUMAN Heterogeneous nuclear ribonucleoprotein H OS=Homo sapiens OX=9606 GN=HNRNPH1 PE=1 SV=1;tr|G8JLB6|G8JLB6_HUMAN Heterogeneous nuclear ribonucleoprotein H OS=Homo sapiens OX=9606 GN=HNRNPH1 PE=1 SV=1;sp|P31943|HNRH1_HUMAN Heterogeneous	Homo sapiens	25	10	8	37.5	47.087	429	0	75.658	37.5	48768000	48768000	0.0660322	19			174
O43852;H0Y875	Calumenin	CALU	sp|O43852|CALU_HUMAN Calumenin OS=Homo sapiens OX=9606 GN=CALU PE=1 SV=2	Homo sapiens	2	10	10	36.5	37.106	315	0	37.078	36.5	48604000	48604000	0.0658102	17			315
P50990;H7C4C8;H7C2U0	T-complex protein 1 subunit theta	CCT8	sp|P50990|TCPQ_HUMAN T-complex protein 1 subunit theta OS=Homo sapiens OX=9606 GN=CCT8 PE=1 SV=4	Homo sapiens	3	12	12	30.3	59.62	548	0	68.398	30.3	47054000	47054000	0.0637114	15			450
O15371;B0QYA5;B0QYA6;B0QYA4;B0QYA8	Eukaryotic translation initiation factor 3 subunit D	EIF3D	sp|O15371|EIF3D_HUMAN Eukaryotic translation initiation factor 3 subunit D OS=Homo sapiens OX=9606 GN=EIF3D PE=1 SV=1;tr|B0QYA5|B0QYA5_HUMAN Eukaryotic translation initiation factor 3 subunit D (Fragment) OS=Homo sapiens OX=9606 GN=EIF3D PE=1 SV=1	Homo sapiens	5	10	10	29.2	63.972	548	0	102.3	29.2	46718000	46718000	0.0632565	19			307
P55884;C9JQN7;C9JZG1	Eukaryotic translation initiation factor 3 subunit B	EIF3B	sp|P55884|EIF3B_HUMAN Eukaryotic translation initiation factor 3 subunit B OS=Homo sapiens OX=9606 GN=EIF3B PE=1 SV=3	Homo sapiens	3	15	15	24.8	92.48	814	0	36.366	24.8	45659000	45659000	0.0618226	19			464
Q13200;F8WBS8;H7C2Q3;C9JPC0	26S proteasome non-ATPase regulatory subunit 2	PSMD2	sp|Q13200|PSMD2_HUMAN 26S proteasome non-ATPase regulatory subunit 2 OS=Homo sapiens OX=9606 GN=PSMD2 PE=1 SV=3	Homo sapiens	4	7	7	13.7	100.2	908	0	44.1	13.7	44190000	44190000	0.0598336	10			523
Q13885;Q9BVA1	Tubulin beta-2A chain;Tubulin beta-2B chain	TUBB2A;TUBB2B	sp|Q13885|TBB2A_HUMAN Tubulin beta-2A chain OS=Homo sapiens OX=9606 GN=TUBB2A PE=1 SV=1;sp|Q9BVA1|TBB2B_HUMAN Tubulin beta-2B chain OS=Homo sapiens OX=9606 GN=TUBB2B PE=1 SV=1	Homo sapiens	2	20	5	62.9	49.906	445	0	37.688	62.9	43883000	43883000	0.0594179	13			529
S4R3H4;E7EQT4;Q9UKV3;G3V3T3;G3V3B0	Apoptotic chromatin condensation inducer in the nucleus	ACIN1	tr|S4R3H4|S4R3H4_HUMAN Apoptotic chromatin condensation inducer in the nucleus OS=Homo sapiens OX=9606 GN=ACIN1 PE=1 SV=1;tr|E7EQT4|E7EQT4_HUMAN Apoptotic chromatin condensation inducer in the nucleus OS=Homo sapiens OX=9606 GN=ACIN1 PE=1 SV=2;sp|Q9UKV3|AC	Homo sapiens	5	10	10	15	145.44	1283	0	112.54	15	42945000	42945000	0.0581478	13			664
P0DP25;P0DP24;P0DP23;E7EMB3;F8WBR5;M0QZ52;G3V479;G3V361;A0A590UJI2;Q96HY3;P27482		CALM2;CALM3;CALM1	sp|P0DP25|CALM3_HUMAN Calmodulin-3 OS=Homo sapiens OX=9606 GN=CALM3 PE=1 SV=1;sp|P0DP24|CALM2_HUMAN Calmodulin-2 OS=Homo sapiens OX=9606 GN=CALM2 PE=1 SV=1;sp|P0DP23|CALM1_HUMAN Calmodulin-1 OS=Homo sapiens OX=9606 GN=CALM1 PE=1 SV=1;tr|E7EMB3|E7EMB3_HUMAN	Homo sapiens	11	6	6	33.6	16.837	149	0	121.64	33.6	42394000	42394000	0.0574018	8			363
A0A087WWU8;D6R904;J3KN67;A0A494C0P6;A0A2R2Y2Q3;P06753;Q5VU61	Tropomyosin alpha-3 chain	TPM3	tr|A0A087WWU8|A0A087WWU8_HUMAN Tropomyosin alpha-3 chain OS=Homo sapiens OX=9606 GN=TPM3 PE=1 SV=1;tr|D6R904|D6R904_HUMAN Tropomyosin alpha-3 chain OS=Homo sapiens OX=9606 GN=TPM3 PE=1 SV=1;tr|J3KN67|J3KN67_HUMAN Tropomyosin alpha-3 chain OS=Homo sapiens O	Homo sapiens	7	12	7	37	26.42	227	0	157.53	37	40839000	40839000	0.0552963	9			18
P49368;B4DUR8;E9PRC8;Q5SZX6;E9PQ35;E9PM09;Q5SZX9	T-complex protein 1 subunit gamma	CCT3	sp|P49368|TCPG_HUMAN T-complex protein 1 subunit gamma OS=Homo sapiens OX=9606 GN=CCT3 PE=1 SV=4;tr|B4DUR8|B4DUR8_HUMAN T-complex protein 1 subunit gamma OS=Homo sapiens OX=9606 GN=CCT3 PE=1 SV=1	Homo sapiens	7	11	11	26.1	60.533	545	0	44.02	26.1	39370000	39370000	0.0533073	16			445
M0QZC5;P62280;M0R1H6	40S ribosomal protein S11	RPS11	tr|M0QZC5|M0QZC5_HUMAN 40S ribosomal protein S11 OS=Homo sapiens OX=9606 GN=RPS11 PE=1 SV=1;sp|P62280|RS11_HUMAN 40S ribosomal protein S11 OS=Homo sapiens OX=9606 GN=RPS11 PE=1 SV=3;tr|M0R1H6|M0R1H6_HUMAN 40S ribosomal protein S11 OS=Homo sapiens OX=9606 G	Homo sapiens	3	4	4	40.7	13.997	118	0	11.871	40.7	38675000	38675000	0.0523662	5			286
Q9C0C9;K7ES11	E2/E3 hybrid ubiquitin-protein ligase UBE2O	UBE2O	sp|Q9C0C9|UBE2O_HUMAN (E3-independent) E2 ubiquitin-conjugating enzyme OS=Homo sapiens OX=9606 GN=UBE2O PE=1 SV=3;tr|K7ES11|K7ES11_HUMAN (E3-independent) E2 ubiquitin-conjugating enzyme (Fragment) OS=Homo sapiens OX=9606 GN=UBE2O PE=1 SV=1	Homo sapiens	2	9	9	11.4	141.29	1292	0	20.248	11.4	38234000	38234000	0.0517691	14			625
P12956;B1AHC9	X-ray repair cross-complementing protein 6	XRCC6	sp|P12956|XRCC6_HUMAN X-ray repair cross-complementing protein 6 OS=Homo sapiens OX=9606 GN=XRCC6 PE=1 SV=2;tr|B1AHC9|B1AHC9_HUMAN ATP-dependent DNA helicase 2 subunit 1 OS=Homo sapiens OX=9606 GN=XRCC6 PE=1 SV=1	Homo sapiens	2	8	8	14.9	69.842	609	0	30.291	14.9	38192000	38192000	0.0517122	14			376
E7EX90;Q14203;E7EWF7;Q6AWB1;C9JJD0;C9JKG6;E9PCY0;C9JZA4;C9JTE5;C9JJN7	Dynactin subunit 1	DCTN1	tr|E7EX90|E7EX90_HUMAN Dynactin subunit 1 OS=Homo sapiens OX=9606 GN=DCTN1 PE=1 SV=1;sp|Q14203|DCTN1_HUMAN Dynactin subunit 1 OS=Homo sapiens OX=9606 GN=DCTN1 PE=1 SV=3;tr|E7EWF7|E7EWF7_HUMAN Uncharacterized protein (Fragment) OS=Homo sapiens OX=9606 PE=4	Homo sapiens	10	12	12	13.8	139.09	1256	0	62.427	13.8	37740000	37740000	0.0511002	17			170
P63261;I3L4N8;K7EM38;I3L3R2;J3KT65;I3L3I0;I3L1U9	Actin, cytoplasmic 2;Actin, cytoplasmic 2, N-terminally processed	ACTG1	sp|P63261|ACTG_HUMAN Actin, cytoplasmic 2 OS=Homo sapiens OX=9606 GN=ACTG1 PE=1 SV=1	Homo sapiens	7	14	1	49.9	41.792	375	0	120.36	49.9	37071000	37071000	0.0501944	8			488
P12532;F8WCN3;C9JSQ1;C9J995;C9J8F6;C9JJX8;C9J6W7;C9JT96;P17540	Creatine kinase U-type, mitochondrial	CKMT1A;CKMT1B	sp|P12532|KCRU_HUMAN Creatine kinase U-type, mitochondrial OS=Homo sapiens OX=9606 GN=CKMT1A PE=1 SV=1;tr|F8WCN3|F8WCN3_HUMAN Creatine kinase OS=Homo sapiens OX=9606 GN=CKMT1A PE=1 SV=1	Homo sapiens	9	9	9	43.4	47.036	417	0	29.494	43.4	37060000	37060000	0.0501795	14			374
A0A087WZK9;B3KS98;O15372;E5RJT0	Eukaryotic translation initiation factor 3 subunit H	EIF3H	tr|A0A087WZK9|A0A087WZK9_HUMAN Eukaryotic translation initiation factor 3 subunit H OS=Homo sapiens OX=9606 GN=EIF3H PE=1 SV=1;tr|B3KS98|B3KS98_HUMAN Eukaryotic translation initiation factor 3 subunit H OS=Homo sapiens OX=9606 GN=EIF3H PE=1 SV=1;sp|O15372|	Homo sapiens	4	7	7	22.6	39.589	349	0	23.165	22.6	36826000	36826000	0.0498627	11			25
P60228;H0YBR5;E5RIT4;E5RGA2;H0YAW4	Eukaryotic translation initiation factor 3 subunit E	EIF3E	sp|P60228|EIF3E_HUMAN Eukaryotic translation initiation factor 3 subunit E OS=Homo sapiens OX=9606 GN=EIF3E PE=1 SV=1;tr|H0YBR5|H0YBR5_HUMAN Eukaryotic translation initiation factor 3 subunit E (Fragment) OS=Homo sapiens OX=9606 GN=EIF3E PE=1 SV=1;tr|E5RIT	Homo sapiens	5	9	9	19.1	52.22	445	0	27.871	19.1	36610000	36610000	0.0495702	11			466
Q9HC35;B5MBZ0	Echinoderm microtubule-associated protein-like 4	EML4	sp|Q9HC35|EMAL4_HUMAN Echinoderm microtubule-associated protein-like 4 OS=Homo sapiens OX=9606 GN=EML4 PE=1 SV=3;tr|B5MBZ0|B5MBZ0_HUMAN Echinoderm microtubule-associated protein-like 4 OS=Homo sapiens OX=9606 GN=EML4 PE=1 SV=3	Homo sapiens	2	9	9	12.2	108.91	981	0	32.933	12.2	36592000	36592000	0.0495458	11			629
P20042	Eukaryotic translation initiation factor 2 subunit 2	EIF2S2	sp|P20042|IF2B_HUMAN Eukaryotic translation initiation factor 2 subunit 2 OS=Homo sapiens OX=9606 GN=EIF2S2 PE=1 SV=2	Homo sapiens	1	7	7	34.2	38.388	333	0	56.279	34.2	35725000	35725000	0.0483719	16			395
A6NNK5;Q12888;C9JXV0;H7C3N7;M0R142;H7BZY0	Tumor suppressor p53-binding protein 1	TP53BP1	tr|A6NNK5|A6NNK5_HUMAN TP53-binding protein 1 OS=Homo sapiens OX=9606 GN=TP53BP1 PE=1 SV=2;sp|Q12888|TP53B_HUMAN TP53-binding protein 1 OS=Homo sapiens OX=9606 GN=TP53BP1 PE=1 SV=2;tr|C9JXV0|C9JXV0_HUMAN TP53-binding protein 1 (Fragment) OS=Homo sapiens OX	Homo sapiens	6	13	13	13.5	209.02	1927	0	58.791	13.5	35203000	35203000	0.0476651	17			97
A0A499FI31;Q15020;A0A494C0L2;F8W667	Squamous cell carcinoma antigen recognized by T-cells 3	SART3	tr|A0A499FI31|A0A499FI31_HUMAN Squamous cell carcinoma antigen recognized by T-cells 3 OS=Homo sapiens OX=9606 GN=SART3 PE=1 SV=1;sp|Q15020|SART3_HUMAN Squamous cell carcinoma antigen recognized by T-cells 3 OS=Homo sapiens OX=9606 GN=SART3 PE=1 SV=1	Homo sapiens	4	7	7	10.4	111.96	981	0	103.02	10.4	35154000	35154000	0.0475988	12			86
P61163;R4GMT0;A0A1B0GVS3	Alpha-centractin	ACTR1A	sp|P61163|ACTZ_HUMAN Alpha-centractin OS=Homo sapiens OX=9606 GN=ACTR1A PE=1 SV=1;tr|R4GMT0|R4GMT0_HUMAN Alpha-centractin OS=Homo sapiens OX=9606 GN=ACTR1A PE=1 SV=1;tr|A0A1B0GVS3|A0A1B0GVS3_HUMAN Alpha-centractin OS=Homo sapiens OX=9606 GN=ACTR1A PE=1 SV=	Homo sapiens	3	7	4	28.5	42.613	376	0	16.787	28.5	35109000	35109000	0.0475378	13			471
E9PLL6;P46776;E9PJD9;E9PLX7	60S ribosomal protein L27a	RPL27A	tr|E9PLL6|E9PLL6_HUMAN 60S ribosomal protein L27a OS=Homo sapiens OX=9606 GN=RPL27A PE=1 SV=1;sp|P46776|RL27A_HUMAN 60S ribosomal protein L27a OS=Homo sapiens OX=9606 GN=RPL27A PE=1 SV=2;tr|E9PJD9|E9PJD9_HUMAN 60S ribosomal protein L27a OS=Homo sapiens OX=	Homo sapiens	4	6	6	44.4	12.201	108	0	23.367	44.4	34128000	34128000	0.0462096	11			186
C9J9K3;A0A0C4DG17;P08865;F8WD59	40S ribosomal protein SA	RPSA	tr|C9J9K3|C9J9K3_HUMAN 40S ribosomal protein SA (Fragment) OS=Homo sapiens OX=9606 GN=RPSA PE=1 SV=8;tr|A0A0C4DG17|A0A0C4DG17_HUMAN 40S ribosomal protein SA OS=Homo sapiens OX=9606 GN=RPSA PE=1 SV=1;sp|P08865|RSSA_HUMAN 40S ribosomal protein SA OS=Homo sap	Homo sapiens	4	4	4	23.2	29.404	263	0	54.123	23.2	34079000	34079000	0.0461432	8			42
Q15029;K7EP67;K7EJ74;K7EIV5;K7EIT3	116 kDa U5 small nuclear ribonucleoprotein component	EFTUD2	sp|Q15029|U5S1_HUMAN 116 kDa U5 small nuclear ribonucleoprotein component OS=Homo sapiens OX=9606 GN=EFTUD2 PE=1 SV=1;tr|K7EP67|K7EP67_HUMAN 116 kDa U5 small nuclear ribonucleoprotein component (Fragment) OS=Homo sapiens OX=9606 GN=EFTUD2 PE=1 SV=1	Homo sapiens	5	12	12	21.1	109.43	972	0	46.001	21.1	33115000	33115000	0.0448379	17			543
Q15084	Protein disulfide-isomerase A6	PDIA6	sp|Q15084|PDIA6_HUMAN Protein disulfide-isomerase A6 OS=Homo sapiens OX=9606 GN=PDIA6 PE=1 SV=1	Homo sapiens	1	10	10	31.6	48.121	440	0	41.313	31.6	33110000	33110000	0.0448312	18			545
B1APP6;Q01813;H0Y757	ATP-dependent 6-phosphofructokinase, platelet type	PFKP	tr|B1APP6|B1APP6_HUMAN ATP-dependent 6-phosphofructokinase, platelet type OS=Homo sapiens OX=9606 GN=PFKP PE=1 SV=2;sp|Q01813|PFKAP_HUMAN ATP-dependent 6-phosphofructokinase, platelet type OS=Homo sapiens OX=9606 GN=PFKP PE=1 SV=2;tr|H0Y757|H0Y757_HUMAN AT	Homo sapiens	3	5	5	11.4	62.585	568	0	12.699	11.4	32444000	32444000	0.0439294	9			108
F8VQ14;F5GWF6;P78371	T-complex protein 1 subunit beta	CCT2	tr|F8VQ14|F8VQ14_HUMAN CCT-beta OS=Homo sapiens OX=9606 GN=CCT2 PE=1 SV=1;tr|F5GWF6|F5GWF6_HUMAN CCT-beta OS=Homo sapiens OX=9606 GN=CCT2 PE=1 SV=2;sp|P78371|TCPB_HUMAN T-complex protein 1 subunit beta OS=Homo sapiens OX=9606 GN=CCT2 PE=1 SV=4	Homo sapiens	3	8	8	28.1	44.812	416	0	81.499	28.1	32434000	32434000	0.0439159	12			194
Q9BWJ5	Splicing factor 3B subunit 5	SF3B5	sp|Q9BWJ5|SF3B5_HUMAN Splicing factor 3B subunit 5 OS=Homo sapiens OX=9606 GN=SF3B5 PE=1 SV=1	Homo sapiens	1	3	3	46.5	10.135	86	0	30.691	46.5	32261000	32261000	0.0436816	4			622
A0A0G2JIW1;P0DMV9;P0DMV8;V9GZ37;Q53FA3;P34931	Heat shock 70 kDa protein 1B;Heat shock 70 kDa protein 1A;Heat shock 70 kDa protein 1-like	HSPA1B;HSPA1A;HSPA1L	tr|A0A0G2JIW1|A0A0G2JIW1_HUMAN Heat shock 70 kDa protein 1B OS=Homo sapiens OX=9606 GN=HSPA1B PE=1 SV=1;sp|P0DMV9|HS71B_HUMAN Heat shock 70 kDa protein 1B OS=Homo sapiens OX=9606 GN=HSPA1B PE=1 SV=1;sp|P0DMV8|HS71A_HUMAN Heat shock 70 kDa protein 1A OS=Hom	Homo sapiens	6	9	8	17.9	70.108	642	0	42.457	17.9	31998000	31998000	0.0433255	11			50
Q13838;Q5STU3;A0A0G2JJZ9;F6S4E6;A0A0A0MT12;F6TRA5;F6WLT2;F6R6M7;A0A0G2JHN7;F6U6E2;F6S2B7;F6QYI9;A0A0G2JJL7;A0A140T9X3;A0A140T9L4;A0A140T973;A0A140T9K1;A0A140T9X9;A0A140T996;F6UJC5;A0A140TA18;A0A140T9K2;A0A140T9N3	Spliceosome RNA helicase DDX39B	DDX39B	sp|Q13838|DX39B_HUMAN Spliceosome RNA helicase DDX39B OS=Homo sapiens OX=9606 GN=DDX39B PE=1 SV=1;tr|Q5STU3|Q5STU3_HUMAN RNA helicase OS=Homo sapiens OX=9606 GN=DDX39B PE=1 SV=2;tr|A0A0G2JJZ9|A0A0G2JJZ9_HUMAN Spliceosome RNA helicase DDX39B (Fragment) OS=H	Homo sapiens	23	11	3	29.7	48.991	428	0	27.851	29.7	31849000	31849000	0.0431238	11			528
Q15233;H7C367;C9JYS8;C9IZL7	Non-POU domain-containing octamer-binding protein	NONO	sp|Q15233|NONO_HUMAN Non-POU domain-containing octamer-binding protein OS=Homo sapiens OX=9606 GN=NONO PE=1 SV=4;tr|H7C367|H7C367_HUMAN Non-POU domain-containing octamer-binding protein (Fragment) OS=Homo sapiens OX=9606 GN=NONO PE=1 SV=8;tr|C9JYS8|C9JYS8_	Homo sapiens	4	6	6	18.3	54.231	471	0	26.423	18.3	31680000	31680000	0.0428949	9			547
C9JD32;B9ZVP7;J3KT29;P62829	60S ribosomal protein L23	RPL23	tr|C9JD32|C9JD32_HUMAN 60S ribosomal protein L23 (Fragment) OS=Homo sapiens OX=9606 GN=RPL23 PE=1 SV=1;tr|B9ZVP7|B9ZVP7_HUMAN 60S ribosomal protein L23 OS=Homo sapiens OX=9606 GN=RPL23 PE=1 SV=1;tr|J3KT29|J3KT29_HUMAN 60S ribosomal protein L23 OS=Homo sapi	Homo sapiens	4	5	5	52.7	9.6694	91	0	26.054	52.7	31588000	31588000	0.0427704	7			124
P07910;G3V2Q1;G3V576;G3V555;G3V575	Heterogeneous nuclear ribonucleoproteins C1/C2	HNRNPC	sp|P07910|HNRPC_HUMAN Heterogeneous nuclear ribonucleoproteins C1/C2 OS=Homo sapiens OX=9606 GN=HNRNPC PE=1 SV=4;tr|G3V2Q1|G3V2Q1_HUMAN Heterogeneous nuclear ribonucleoproteins C1/C2 OS=Homo sapiens OX=9606 GN=HNRNPC PE=1 SV=1;tr|G3V576|G3V576_HUMAN Hetero	Homo sapiens	5	14	1	62.1	33.67	306	0	2.9177	62.1	31424000	31424000	0.0425483	4			356
P26640;A0A140T936;A2ABF4;A0A0G2JJT9;A0A140T954;A0A140T904;H0Y426	Valine--tRNA ligase	VARS	sp|P26640|SYVC_HUMAN Valine--tRNA ligase OS=Homo sapiens OX=9606 GN=VARS1 PE=1 SV=4;tr|A0A140T936|A0A140T936_HUMAN Valyl-tRNA synthetase (Fragment) OS=Homo sapiens OX=9606 GN=VARS1 PE=1 SV=1	Homo sapiens	7	7	7	7.1	140.47	1264	0	17.704	7.1	31394000	31394000	0.0425077	11			408
A0A0U1RR32;A0A0U1RRH7;Q99878;Q96KK5;Q9BTM1;Q16777;Q6FI13;P20671;P0C0S8;H0YFX9;Q93077;Q7L7L0;P04908;C9J0D1;A0A494C189;A0A3B3IS11;Q71UI9;P0C0S5;Q96QV6;P16104;C9J386;Q8IUE6	Histone H2A type 1-J;Histone H2A type 1-H;Histone H2A.J;Histone H2A type 2-C;Histone H2A type 2-A;Histone H2A type 1-D;Histone H2A type 1;Histone H2A;Histone H2A type 1-C;Histone H2A type 3;Histone H2A type 1-B/E;Histone H2A.V;Histone H2A.Z;Histone H2A type 1-A;Histone H2AX	HIST1H2AJ;HIST1H2AH;H2AFJ;HIST2H2AC;HIST2H2AA3;HIST1H2AD;HIST1H2AG;HIST1H2AC;HIST3H2A;HIST1H2AB;H2AFV;H2AFZ;HIST1H2AA;H2AFX	tr|A0A0U1RR32|A0A0U1RR32_HUMAN Histone H2A OS=Homo sapiens OX=9606 GN=hCG_2039566 PE=3 SV=1;tr|A0A0U1RRH7|A0A0U1RRH7_HUMAN Histone H2A OS=Homo sapiens OX=9606 PE=3 SV=1;sp|Q99878|H2A1J_HUMAN Histone H2A type 1-J OS=Homo sapiens OX=9606 GN=H2AC14 PE=1 SV=3;	Homo sapiens	22	4	4	27.2	18.481	169	0	8.7495	27.2	31234000	31234000	0.0422911	6			62
P35998;C9JLS9	26S protease regulatory subunit 7	PSMC2	sp|P35998|PRS7_HUMAN 26S proteasome regulatory subunit 7 OS=Homo sapiens OX=9606 GN=PSMC2 PE=1 SV=3;tr|C9JLS9|C9JLS9_HUMAN 26S proteasome regulatory subunit 7 (Fragment) OS=Homo sapiens OX=9606 GN=PSMC2 PE=1 SV=1	Homo sapiens	2	7	7	20.8	48.633	433	0	36.913	20.8	31010000	31010000	0.0419878	12			424
P30050	60S ribosomal protein L12	RPL12	sp|P30050|RL12_HUMAN 60S ribosomal protein L12 OS=Homo sapiens OX=9606 GN=RPL12 PE=1 SV=1	Homo sapiens	1	5	5	43	17.818	165	0	90.569	43	30924000	30924000	0.0418713	9			417
Q08211	ATP-dependent RNA helicase A	DHX9	sp|Q08211|DHX9_HUMAN ATP-dependent RNA helicase A OS=Homo sapiens OX=9606 GN=DHX9 PE=1 SV=4	Homo sapiens	1	11	11	14.3	140.96	1270	0	50.15	14.3	30599000	30599000	0.0414313	13			509
A0A087WW66;Q99460;H7BZR6	26S proteasome non-ATPase regulatory subunit 1	PSMD1	tr|A0A087WW66|A0A087WW66_HUMAN 26S proteasome non-ATPase regulatory subunit 1 OS=Homo sapiens OX=9606 GN=PSMD1 PE=1 SV=1;sp|Q99460|PSMD1_HUMAN 26S proteasome non-ATPase regulatory subunit 1 OS=Homo sapiens OX=9606 GN=PSMD1 PE=1 SV=2	Homo sapiens	3	6	6	9.1	105.85	953	0	34.058	9.1	30595000	30595000	0.0414258	11			16
K7ERF1;Q9UBQ5;K7ES31;A0A087WVB9;K7EK53;K7EQM4	Eukaryotic translation initiation factor 3 subunit K	EIF3K	tr|K7ERF1|K7ERF1_HUMAN Eukaryotic translation initiation factor 3 subunit K OS=Homo sapiens OX=9606 GN=EIF3K PE=1 SV=1;sp|Q9UBQ5|EIF3K_HUMAN Eukaryotic translation initiation factor 3 subunit K OS=Homo sapiens OX=9606 GN=EIF3K PE=1 SV=1;tr|K7ES31|K7ES31_HU	Homo sapiens	6	4	4	29.7	22.095	192	0	30.786	29.7	29960000	29960000	0.0405661	7			263
P24928;A0A6Q8PGB0;A0A6Q8PHB0	DNA-directed RNA polymerase II subunit RPB1	POLR2A	sp|P24928|RPB1_HUMAN DNA-directed RNA polymerase II subunit RPB1 OS=Homo sapiens OX=9606 GN=POLR2A PE=1 SV=2;tr|A0A6Q8PGB0|A0A6Q8PGB0_HUMAN DNA-directed RNA polymerase subunit OS=Homo sapiens OX=9606 GN=POLR2A PE=1 SV=1	Homo sapiens	3	9	9	7.8	217.17	1970	0	48.021	7.8	29038000	29038000	0.0393177	13			403
P04181	Ornithine aminotransferase, mitochondrial;Ornithine aminotransferase, hepatic form;Ornithine aminotransferase, renal form	OAT	sp|P04181|OAT_HUMAN Ornithine aminotransferase, mitochondrial OS=Homo sapiens OX=9606 GN=OAT PE=1 SV=1	Homo sapiens	1	5	5	14.1	48.534	439	0	25.229	14.1	28518000	28518000	0.0386136	6			341
Q13185;S4R2Y4;C9JMM0;B8ZZ43	Chromobox protein homolog 3	CBX3	sp|Q13185|CBX3_HUMAN Chromobox protein homolog 3 OS=Homo sapiens OX=9606 GN=CBX3 PE=1 SV=4;tr|S4R2Y4|S4R2Y4_HUMAN Chromobox protein homolog 3 (Fragment) OS=Homo sapiens OX=9606 GN=CBX3 PE=1 SV=1;tr|C9JMM0|C9JMM0_HUMAN Chromobox protein homolog 3 (Fragment)	Homo sapiens	4	6	6	39.3	20.811	183	0	85.557	39.3	28050000	28050000	0.0379799	7			522
U3KQK0;Q99880;Q99879;Q99877;Q93079;Q8N257;Q5QNW6;Q16778;P62807;P58876;P57053;P33778;P23527;P06899;O60814;Q96A08;A0A2R8Y619	Histone H2B;Histone H2B type 1-L;Histone H2B type 1-M;Histone H2B type 1-N;Histone H2B type 1-H;Histone H2B type 3-B;Histone H2B type 2-F;Histone H2B type 2-E;Histone H2B type 1-C/E/F/G/I;Histone H2B type 1-D;Histone H2B type F-S;Histone H2B type 1-B;Histone H2B type 1-O;Histone H2B type 1-J;Histone H2B type 1-K;Histone H2B type 1-A	HIST1H2BN;HIST1H2BL;HIST1H2BM;HIST1H2BH;HIST3H2BB;HIST2H2BF;HIST2H2BE;HIST1H2BC;HIST1H2BD;H2BFS;HIST1H2BB;HIST1H2BO;HIST1H2BJ;HIST1H2BK;HIST1H2BA	tr|U3KQK0|U3KQK0_HUMAN Histone H2B OS=Homo sapiens OX=9606 GN=H2BC15 PE=1 SV=1;sp|Q99880|H2B1L_HUMAN Histone H2B type 1-L OS=Homo sapiens OX=9606 GN=H2BC13 PE=1 SV=3;sp|Q99879|H2B1M_HUMAN Histone H2B type 1-M OS=Homo sapiens OX=9606 GN=H2BC14 PE=1 SV=3;sp|	Homo sapiens	17	3	3	22.9	18.804	166	0	22.7	22.9	28014000	28014000	0.0379312	7			321
J3KTA4;P17844;J3QRQ7;X6RLV5;J3QR02;J3KRX8;J3KTQ4	Probable ATP-dependent RNA helicase DDX5	DDX5	tr|J3KTA4|J3KTA4_HUMAN DEAD box protein 5 OS=Homo sapiens OX=9606 GN=DDX5 PE=1 SV=1;sp|P17844|DDX5_HUMAN Probable ATP-dependent RNA helicase DDX5 OS=Homo sapiens OX=9606 GN=DDX5 PE=1 SV=1;tr|J3QRQ7|J3QRQ7_HUMAN RNA helicase (Fragment) OS=Homo sapiens OX=96	Homo sapiens	7	12	7	21	69.086	614	0	28.127	21	27854000	27854000	0.0377145	11			254
E9PPJ0;Q13435;E9PJT3;E9PJ04;H0YCG1	Splicing factor 3B subunit 2	SF3B2	tr|E9PPJ0|E9PPJ0_HUMAN Splicing factor 3B subunit 2 OS=Homo sapiens OX=9606 GN=SF3B2 PE=1 SV=1;sp|Q13435|SF3B2_HUMAN Splicing factor 3B subunit 2 OS=Homo sapiens OX=9606 GN=SF3B2 PE=1 SV=2;tr|E9PJT3|E9PJT3_HUMAN Splicing factor 3B subunit 2 (Fragment) OS=H	Homo sapiens	5	4	4	9.2	98.169	878	0	6.8924	9.2	27052000	27052000	0.0366286	8			191
P62979;J3QS39;J3QTR3;F5H6Q2;F5GYU3;F5H2Z3;F5H265;B4DV12;F5H388;A0A2R8Y422;F5H747;F5GXK7;J3QKN0;Q5PY61;Q96C32;P62987;P0CG47;P0CG48;M0R1V7;M0R1M6;M0R2S1;J3QSA3;F5GZ39	Ubiquitin-40S ribosomal protein S27a;Ubiquitin;40S ribosomal protein S27a;Ubiquitin-60S ribosomal protein L40;Ubiquitin;60S ribosomal protein L40;Polyubiquitin-B;Ubiquitin;Polyubiquitin-C;Ubiquitin	RPS27A;UBB;UBC;UBA52	sp|P62979|RS27A_HUMAN Ubiquitin-40S ribosomal protein S27a OS=Homo sapiens OX=9606 GN=RPS27A PE=1 SV=2;tr|J3QS39|J3QS39_HUMAN Polyubiquitin-B (Fragment) OS=Homo sapiens OX=9606 GN=UBB PE=1 SV=1;tr|J3QTR3|J3QTR3_HUMAN Ubiquitin-40S ribosomal protein S27a (F	Homo sapiens	23	4	4	37.8	17.965	156	0	65.784	37.8	26463000	26463000	0.0358311	8			486
Q9BQA1;H0Y711	Methylosome protein 50	WDR77	sp|Q9BQA1|MEP50_HUMAN Methylosome protein 50 OS=Homo sapiens OX=9606 GN=WDR77 PE=1 SV=1	Homo sapiens	2	5	5	15.5	36.724	342	0	21.222	15.5	26366000	26366000	0.0356998	7			617
Q5EBL4;A0A1B0GVV3;Q969X0	RILP-like protein 1	RILPL1	sp|Q5EBL4|RIPL1_HUMAN RILP-like protein 1 OS=Homo sapiens OX=9606 GN=RILPL1 PE=1 SV=1;tr|A0A1B0GVV3|A0A1B0GVV3_HUMAN RILP-like protein 1 OS=Homo sapiens OX=9606 GN=RILPL1 PE=1 SV=1	Homo sapiens	3	9	9	36	47.107	403	0	23.206	36	25912000	25912000	0.035085	11			565
A0A0A0MRQ5;Q06830;A0A0A0MSI0;H7C3T4;P32119	Peroxiredoxin-1	PRDX1	tr|A0A0A0MRQ5|A0A0A0MRQ5_HUMAN Peroxiredoxin-1 OS=Homo sapiens OX=9606 GN=PRDX1 PE=1 SV=1;sp|Q06830|PRDX1_HUMAN Peroxiredoxin-1 OS=Homo sapiens OX=9606 GN=PRDX1 PE=1 SV=1;tr|A0A0A0MSI0|A0A0A0MSI0_HUMAN Peroxiredoxin-1 (Fragment) OS=Homo sapiens OX=9606 GN=	Homo sapiens	5	4	3	56.7	10.676	97	0	7.9182	56.7	25597000	25597000	0.0346585	5			38
B0QY89;Q9Y262;B0QY90;H0Y7E6;C9JHP4;C9K0Q7	Eukaryotic translation initiation factor 3 subunit L	EIF3L	tr|B0QY89|B0QY89_HUMAN Eukaryotic translation initiation factor 3 subunit L OS=Homo sapiens OX=9606 GN=EIF3L PE=1 SV=1;sp|Q9Y262|EIF3L_HUMAN Eukaryotic translation initiation factor 3 subunit L OS=Homo sapiens OX=9606 GN=EIF3L PE=1 SV=1;tr|B0QY90|B0QY90_HU	Homo sapiens	6	8	8	17.8	70.901	607	0	165.58	17.8	25498000	25498000	0.0345245	15			103
Q5TCU3;CON__Q3SX28;A7XZE4;P07951	Tropomyosin beta chain	TPM2;TPM2b	tr|Q5TCU3|Q5TCU3_HUMAN Tropomyosin beta chain OS=Homo sapiens OX=9606 GN=TPM2 PE=1 SV=1;;tr|A7XZE4|A7XZE4_HUMAN Beta tropomyosin isoform OS=Homo sapiens OX=9606 GN=TPM2 PE=1 SV=1;sp|P07951|TPM2_HUMAN Tropomyosin beta chain OS=Homo sapiens OX=9606 GN=TPM2 P	Homo sapiens	4	8	1	16.9	32.814	284	0	8.876	16.9	25495000	25495000	0.0345204	1		+	98
P11142;E9PKE3;E9PI65;E9PQQ4;E9PQK7;E9PK54;E9PLF4;E9PNE6;E9PN25;E9PPY6;E9PN89;A8K7Q2;P54652;E9PM13;E9PS65	Heat shock cognate 71 kDa protein	HSPA8	sp|P11142|HSP7C_HUMAN Heat shock cognate 71 kDa protein OS=Homo sapiens OX=9606 GN=HSPA8 PE=1 SV=1;tr|E9PKE3|E9PKE3_HUMAN Heat shock cognate 71 kDa protein OS=Homo sapiens OX=9606 GN=HSPA8 PE=1 SV=1;tr|E9PI65|E9PI65_HUMAN Heat shock cognate 71 kDa protein	Homo sapiens	15	8	7	20.6	70.897	646	0	47.229	20.6	25313000	25313000	0.034274	11			371
Q15424;Q14151;K7ES42	Scaffold attachment factor B1;Scaffold attachment factor B2	SAFB;SAFB2	sp|Q15424|SAFB1_HUMAN Scaffold attachment factor B1 OS=Homo sapiens OX=9606 GN=SAFB PE=1 SV=4;sp|Q14151|SAFB2_HUMAN Scaffold attachment factor B2 OS=Homo sapiens OX=9606 GN=SAFB2 PE=1 SV=1	Homo sapiens	3	7	7	12.7	102.64	915	0	75.809	12.7	25285000	25285000	0.0342361	10			551
O00303;H0YDT6;E9PQV8;A0A1W2PP79	Eukaryotic translation initiation factor 3 subunit F	EIF3F	sp|O00303|EIF3F_HUMAN Eukaryotic translation initiation factor 3 subunit F OS=Homo sapiens OX=9606 GN=EIF3F PE=1 SV=1	Homo sapiens	4	5	5	19.3	37.563	357	0	69.609	19.3	25248000	25248000	0.034186	9			299
A0A087WTP3;Q92945;M0R0I5;M0QYH3;M0QXW7;M0R3J3;M0R251;M0QYG1;M0R263;M0R0C6	Far upstream element-binding protein 2	KHSRP	tr|A0A087WTP3|A0A087WTP3_HUMAN Far upstream element-binding protein 2 OS=Homo sapiens OX=9606 GN=KHSRP PE=1 SV=1;sp|Q92945|FUBP2_HUMAN Far upstream element-binding protein 2 OS=Homo sapiens OX=9606 GN=KHSRP PE=1 SV=4;tr|M0R0I5|M0R0I5_HUMAN Far upstream ele	Homo sapiens	10	8	7	16.2	73.027	711	0	25.548	16.2	24848000	24848000	0.0336444	7			5
A0A087WVQ6;Q00610;J3KS13;A0A087WX41;P53675	Clathrin heavy chain;Clathrin heavy chain 1	CLTC	tr|A0A087WVQ6|A0A087WVQ6_HUMAN Clathrin heavy chain OS=Homo sapiens OX=9606 GN=CLTC PE=1 SV=1;sp|Q00610|CLH1_HUMAN Clathrin heavy chain 1 OS=Homo sapiens OX=9606 GN=CLTC PE=1 SV=5	Homo sapiens	5	10	10	7.6	192.06	1679	0	107.13	7.6	24146000	24146000	0.0326939	12			13
E9PJF4;P54105;E9PMI6;J3KN38;E9PQ83	Methylosome subunit pICln	CLNS1A	tr|E9PJF4|E9PJF4_HUMAN Chloride channel, nucleotide sensitive 1A OS=Homo sapiens OX=9606 GN=CLNS1A PE=1 SV=1;sp|P54105|ICLN_HUMAN Methylosome subunit pICln OS=Homo sapiens OX=9606 GN=CLNS1A PE=1 SV=1;tr|E9PMI6|E9PMI6_HUMAN Chloride channel, nucleotide sens	Homo sapiens	5	5	5	36.9	19.743	179	0	7.7769	36.9	23997000	23997000	0.0324921	8			180
Q15365	Poly(rC)-binding protein 1	PCBP1	sp|Q15365|PCBP1_HUMAN Poly(rC)-binding protein 1 OS=Homo sapiens OX=9606 GN=PCBP1 PE=1 SV=2	Homo sapiens	1	5	3	21.6	37.497	356	0	25.544	21.6	23557000	23557000	0.0318963	6			549
Q9UQ80;F8VR77	Proliferation-associated protein 2G4	PA2G4	sp|Q9UQ80|PA2G4_HUMAN Proliferation-associated protein 2G4 OS=Homo sapiens OX=9606 GN=PA2G4 PE=1 SV=3	Homo sapiens	2	6	6	15	43.786	394	0	24.245	15	23514000	23514000	0.0318381	6			650
A0A024QZP7;P06493;E5RIU6;A0A087WZZ9;K7ELV5;E7ESI2;G3V5T9;P24941;Q00526;G3V317;F8VXD2;A0A2R8YEB7;F8VYH9;F8VZZ0;F8VTV8;F8VWX7;F8VZ51;K7EJ83;A0A2R8Y644;H0YAZ9;Q9BVE2;E7EUK8;E5RGN0;A0A087X209;A0A087WZU2;A0A2R8YD28;F5H6Z0;A0A2R8YF61;A0A2R8Y7W5;J3QSD7;A0A2R8Y4Z0;Q00535;P11802;Q00534;P50750;Q96Q40;O94921;Q07002;Q00536;Q00537;Q9NYV4;Q14004	Cyclin-dependent kinase 1	CDC2;CDK1	tr|A0A024QZP7|A0A024QZP7_HUMAN Cell division cycle 2, G1 to S and G2 to M, isoform CRA_a OS=Homo sapiens OX=9606 GN=CDK1 PE=1 SV=1;sp|P06493|CDK1_HUMAN Cyclin-dependent kinase 1 OS=Homo sapiens OX=9606 GN=CDK1 PE=1 SV=3	Homo sapiens	42	9	9	30	34.081	297	0	45.917	30	23495000	23495000	0.0318124	10			0
Q02790;F5H120;H0YFG2	Peptidyl-prolyl cis-trans isomerase FKBP4;Peptidyl-prolyl cis-trans isomerase FKBP4, N-terminally processed	FKBP4	sp|Q02790|FKBP4_HUMAN Peptidyl-prolyl cis-trans isomerase FKBP4 OS=Homo sapiens OX=9606 GN=FKBP4 PE=1 SV=3	Homo sapiens	3	6	6	20.9	51.804	459	0	71.446	20.9	23468000	23468000	0.0317758	7			504
Q9NY27;C9IZ04;F8WCA1;F8WDK3;H7C559	Serine/threonine-protein phosphatase 4 regulatory subunit 2	PPP4R2	sp|Q9NY27|PP4R2_HUMAN Serine/threonine-protein phosphatase 4 regulatory subunit 2 OS=Homo sapiens OX=9606 GN=PPP4R2 PE=1 SV=3;tr|C9IZ04|C9IZ04_HUMAN Serine/threonine-protein phosphatase 4 regulatory subunit 2 (Fragment) OS=Homo sapiens OX=9606 GN=PPP4R2 PE	Homo sapiens	5	7	7	25.2	46.898	417	0	34.187	25.2	23362000	23362000	0.0316323	8			635
P68366;C9JDL2;C9JEV8;C9JQ00;C9JJQ8	Tubulin alpha-4A chain	TUBA4A	sp|P68366|TBA4A_HUMAN Tubulin alpha-4A chain OS=Homo sapiens OX=9606 GN=TUBA4A PE=1 SV=1	Homo sapiens	5	19	1	46	49.924	448	0	11.861	46	23098000	23098000	0.0312749	4			495
P62701;C9JEH7;P22090;Q8TD47	40S ribosomal protein S4, X isoform	RPS4X	sp|P62701|RS4X_HUMAN 40S ribosomal protein S4, X isoform OS=Homo sapiens OX=9606 GN=RPS4X PE=1 SV=2	Homo sapiens	4	7	7	30	29.597	263	0	10.073	30	22932000	22932000	0.0310501	8			480
P49411;H3BNU3	Elongation factor Tu, mitochondrial	TUFM	sp|P49411|EFTU_HUMAN Elongation factor Tu, mitochondrial OS=Homo sapiens OX=9606 GN=TUFM PE=1 SV=2	Homo sapiens	2	8	8	25.2	49.541	452	0	26.965	25.2	22915000	22915000	0.0310271	10			446
A0A2R8Y811;P62263;E5RH77	40S ribosomal protein S14	RPS14	tr|A0A2R8Y811|A0A2R8Y811_HUMAN 40S ribosomal protein S14 (Fragment) OS=Homo sapiens OX=9606 GN=RPS14 PE=1 SV=1;sp|P62263|RS14_HUMAN 40S ribosomal protein S14 OS=Homo sapiens OX=9606 GN=RPS14 PE=1 SV=3;tr|E5RH77|E5RH77_HUMAN 40S ribosomal protein S14 OS=Hom	Homo sapiens	3	4	4	32	16.159	150	0	12.405	32	22601000	22601000	0.0306019	5			76
P22314;Q5JRR9;Q5JRS0;Q5JRS1;Q5JRS3;Q5JRS2;Q5JRR6	Ubiquitin-like modifier-activating enzyme 1	UBA1	sp|P22314|UBA1_HUMAN Ubiquitin-like modifier-activating enzyme 1 OS=Homo sapiens OX=9606 GN=UBA1 PE=1 SV=3	Homo sapiens	7	10	10	14.2	117.85	1058	0	84.176	14.2	22597000	22597000	0.0305965	16			399
A0A087WUK2;O14979	Heterogeneous nuclear ribonucleoprotein D-like	HNRNPDL	tr|A0A087WUK2|A0A087WUK2_HUMAN Heterogeneous nuclear ribonucleoprotein D-like OS=Homo sapiens OX=9606 GN=HNRNPDL PE=1 SV=1;sp|O14979|HNRDL_HUMAN Heterogeneous nuclear ribonucleoprotein D-like OS=Homo sapiens OX=9606 GN=HNRNPDL PE=1 SV=3	Homo sapiens	2	5	3	11.8	40.04	363	0	55.8	11.8	22054000	22054000	0.0298613	6			9
M0R3H0;M0R210;Q6IPX4;P62249;M0QX76;M0R1M5	40S ribosomal protein S16	RPS16	tr|M0R3H0|M0R3H0_HUMAN 40S ribosomal protein S16 OS=Homo sapiens OX=9606 GN=RPS16 PE=1 SV=1;tr|M0R210|M0R210_HUMAN 40S ribosomal protein S16 OS=Homo sapiens OX=9606 GN=RPS16 PE=1 SV=1;tr|Q6IPX4|Q6IPX4_HUMAN 40S ribosomal protein S16 OS=Homo sapiens OX=9606	Homo sapiens	6	2	2	24	11.075	100	0	4.2883	24	21973000	21973000	0.0297516	4			291
O75607	Nucleoplasmin-3	NPM3	sp|O75607|NPM3_HUMAN Nucleoplasmin-3 OS=Homo sapiens OX=9606 GN=NPM3 PE=1 SV=3	Homo sapiens	1	2	2	14.6	19.343	178	0	17.039	14.6	21886000	21886000	0.0296338	3			324
C9J7B7;Q15008;C9J0E9	26S proteasome non-ATPase regulatory subunit 6	PSMD6	tr|C9J7B7|C9J7B7_HUMAN 26S proteasome non-ATPase regulatory subunit 6 (Fragment) OS=Homo sapiens OX=9606 GN=PSMD6 PE=1 SV=1;sp|Q15008|PSMD6_HUMAN 26S proteasome non-ATPase regulatory subunit 6 OS=Homo sapiens OX=9606 GN=PSMD6 PE=1 SV=1;tr|C9J0E9|C9J0E9_HUM	Homo sapiens	3	4	4	44.4	16.564	144	0	5.8669	44.4	21872000	21872000	0.0296148	4			131
Q99832;F8WAM2;F8WBP8;A0A0D9SG95	T-complex protein 1 subunit eta	CCT7	sp|Q99832|TCPH_HUMAN T-complex protein 1 subunit eta OS=Homo sapiens OX=9606 GN=CCT7 PE=1 SV=2	Homo sapiens	4	9	9	20.1	59.366	543	0	18.805	20.1	21852000	21852000	0.0295878	11			616
A0A2R8Y5G6;A0A0D9SFB3;A0A2R8YF78;A0A2R8YCW1;A0A0D9SG12;A0A2R8YFR4;A0A2U3TZJ9;A0A2R8YFS5;A0A2R8Y4A4;A0A2R8Y645;A0A0D9SF53;O00571;A0A2R8YDT5;A0A2R8Y7T2;F6S8Q4;A0A2R8YDH3;O15523;A0A087WVZ1;A0A0J9YVQ7;A0A2R8YCU0;A0A2R8Y650;D6RCM4;Q9NQI0	ATP-dependent RNA helicase DDX3X;ATP-dependent RNA helicase DDX3Y	DDX3X;DDX3Y	tr|A0A2R8Y5G6|A0A2R8Y5G6_HUMAN RNA helicase OS=Homo sapiens OX=9606 GN=DDX3X PE=1 SV=1;tr|A0A0D9SFB3|A0A0D9SFB3_HUMAN RNA helicase OS=Homo sapiens OX=9606 GN=DDX3X PE=1 SV=1;tr|A0A2R8YF78|A0A2R8YF78_HUMAN RNA helicase OS=Homo sapiens OX=9606 GN=DDX3X PE=1	Homo sapiens	23	11	10	23.5	69.047	622	0	47.739	23.5	21286000	21286000	0.0288214	12			47
Q9UNF0;A0A0U1RR22;B0QYG7;B0QYG8;H0Y923	Protein kinase C and casein kinase substrate in neurons protein 2	PACSIN2	sp|Q9UNF0|PACN2_HUMAN Protein kinase C and casein kinase substrate in neurons protein 2 OS=Homo sapiens OX=9606 GN=PACSIN2 PE=1 SV=2;tr|A0A0U1RR22|A0A0U1RR22_HUMAN Protein kinase C and casein kinase substrate in neurons protein 2 (Fragment) OS=Homo sapiens	Homo sapiens	5	5	5	11.5	55.738	486	0	37.947	11.5	21177000	21177000	0.0286738	8			646
Q5JR95;P62241	40S ribosomal protein S8	RPS8	tr|Q5JR95|Q5JR95_HUMAN 40S ribosomal protein S8 OS=Homo sapiens OX=9606 GN=RPS8 PE=1 SV=1;sp|P62241|RS8_HUMAN 40S ribosomal protein S8 OS=Homo sapiens OX=9606 GN=RPS8 PE=1 SV=2	Homo sapiens	2	4	4	22.3	21.879	188	0	49.181	22.3	20938000	20938000	0.0283502	3			477
O00264;U3KQM0;O15173	Membrane-associated progesterone receptor component 1	PGRMC1	sp|O00264|PGRC1_HUMAN Membrane-associated progesterone receptor component 1 OS=Homo sapiens OX=9606 GN=PGRMC1 PE=1 SV=3	Homo sapiens	3	6	6	36.9	21.671	195	0	27.63	36.9	20810000	20810000	0.0281769	9			296
P40227;Q92526	T-complex protein 1 subunit zeta	CCT6A	sp|P40227|TCPZ_HUMAN T-complex protein 1 subunit zeta OS=Homo sapiens OX=9606 GN=CCT6A PE=1 SV=3	Homo sapiens	2	8	8	23.9	58.024	531	0	15.1	23.9	20487000	20487000	0.0277395	10			432
O75533;H7C341	Splicing factor 3B subunit 1	SF3B1	sp|O75533|SF3B1_HUMAN Splicing factor 3B subunit 1 OS=Homo sapiens OX=9606 GN=SF3B1 PE=1 SV=3	Homo sapiens	2	5	5	5.1	145.83	1304	0	32.097	5.1	20483000	20483000	0.0277341	9			322
A0A087X0X3;P52272;M0QZM1;M0R2I7;M0R019;M0R0Y6;M0QY96;M0QYQ7;M0R0N3;M0R2T0	Heterogeneous nuclear ribonucleoprotein M	HNRNPM	tr|A0A087X0X3|A0A087X0X3_HUMAN Heterogeneous nuclear ribonucleoprotein M OS=Homo sapiens OX=9606 GN=HNRNPM PE=1 SV=1;sp|P52272|HNRPM_HUMAN Heterogeneous nuclear ribonucleoprotein M OS=Homo sapiens OX=9606 GN=HNRNPM PE=1 SV=3;tr|M0QZM1|M0QZM1_HUMAN Heteroge	Homo sapiens	10	5	5	9.3	77.569	730	0	151.9	9.3	20394000	20394000	0.0276136	7			28
E9PNW0;E9PJJ2;E9PS34;E9PNJ7;C9J6D1;Q99733;A8MXH2;E9PKT8;C9JZI7;E9PKI2;E9PP22;C9J1B1	Nucleosome assembly protein 1-like 4	NAP1L4	tr|E9PNW0|E9PNW0_HUMAN Nucleosome assembly protein 1-like 4 (Fragment) OS=Homo sapiens OX=9606 GN=NAP1L4 PE=1 SV=1;tr|E9PJJ2|E9PJJ2_HUMAN Nucleosome assembly protein 1-like 4 (Fragment) OS=Homo sapiens OX=9606 GN=NAP1L4 PE=1 SV=1;tr|E9PS34|E9PS34_HUMAN Nuc	Homo sapiens	12	5	4	60.7	12.25	107	0	57.827	60.7	20193000	20193000	0.0273415	6			130
A0A0D9SFE5;E9PBF6;P20700;A0A0D9SFY5	Lamin-B1	LMNB1	tr|A0A0D9SFE5|A0A0D9SFE5_HUMAN Lamin B1, isoform CRA_a OS=Homo sapiens OX=9606 GN=LMNB1 PE=1 SV=1;tr|E9PBF6|E9PBF6_HUMAN Lamin-B1 OS=Homo sapiens OX=9606 GN=LMNB1 PE=1 SV=1;sp|P20700|LMNB1_HUMAN Lamin-B1 OS=Homo sapiens OX=9606 GN=LMNB1 PE=1 SV=2;tr|A0A0D9	Homo sapiens	4	6	6	21	37.581	329	0	64.822	21	20189000	20189000	0.027336	10			48
Q6P2Q9;I3L0J9	Pre-mRNA-processing-splicing factor 8	PRPF8	sp|Q6P2Q9|PRP8_HUMAN Pre-mRNA-processing-splicing factor 8 OS=Homo sapiens OX=9606 GN=PRPF8 PE=1 SV=2;tr|I3L0J9|I3L0J9_HUMAN Pre-mRNA-processing-splicing factor 8 (Fragment) OS=Homo sapiens OX=9606 GN=PRPF8 PE=1 SV=8	Homo sapiens	2	10	10	7.4	273.6	2335	0	54.656	7.4	20144000	20144000	0.0272751	16			574
P25205;J3KQ69;A0A499FHX9;Q7Z6P5	DNA replication licensing factor MCM3	MCM3	sp|P25205|MCM3_HUMAN DNA replication licensing factor MCM3 OS=Homo sapiens OX=9606 GN=MCM3 PE=1 SV=3;tr|J3KQ69|J3KQ69_HUMAN DNA helicase OS=Homo sapiens OX=9606 GN=MCM3 PE=1 SV=3;tr|A0A499FHX9|A0A499FHX9_HUMAN DNA helicase OS=Homo sapiens OX=9606 GN=MCM3 P	Homo sapiens	4	10	10	18.2	90.98	808	0	131.77	18.2	20111000	20111000	0.0272304	14			404
O60271	C-Jun-amino-terminal kinase-interacting protein 4	SPAG9	sp|O60271|JIP4_HUMAN C-Jun-amino-terminal kinase-interacting protein 4 OS=Homo sapiens OX=9606 GN=SPAG9 PE=1 SV=4	Homo sapiens	1	8	1	8.3	146.2	1321	0	38.055	8.3	20106000	20106000	0.0272237	8			317
Q5T624		NASP	tr|Q5T624|Q5T624_HUMAN Nuclear autoantigenic sperm protein OS=Homo sapiens OX=9606 GN=NASP PE=1 SV=1	Homo sapiens	1	24	0	76.5	45.793	422	0	9.2152	76.5	19991000	19991000	0.027068	2			569
Q9NZI8;F8W930;Q9Y6M1	Insulin-like growth factor 2 mRNA-binding protein 1	IGF2BP1	sp|Q9NZI8|IF2B1_HUMAN Insulin-like growth factor 2 mRNA-binding protein 1 OS=Homo sapiens OX=9606 GN=IGF2BP1 PE=1 SV=2	Homo sapiens	3	6	5	16.1	63.48	577	0	16.293	16.1	19971000	19971000	0.0270409	9			637
O43847;F5H7V1;G3V1R5;H0Y5G9	Nardilysin	NRD1	sp|O43847|NRDC_HUMAN Nardilysin OS=Homo sapiens OX=9606 GN=NRDC PE=1 SV=3;tr|F5H7V1|F5H7V1_HUMAN Nardilysin OS=Homo sapiens OX=9606 GN=NRDC PE=1 SV=2;tr|G3V1R5|G3V1R5_HUMAN Nardilysin OS=Homo sapiens OX=9606 GN=NRDC PE=1 SV=1	Homo sapiens	4	6	6	7.4	131.7	1151	0	39.49	7.4	19951000	19951000	0.0270138	7			314
P13010	X-ray repair cross-complementing protein 5	XRCC5	sp|P13010|XRCC5_HUMAN X-ray repair cross-complementing protein 5 OS=Homo sapiens OX=9606 GN=XRCC5 PE=1 SV=3	Homo sapiens	1	4	4	6	82.704	732	0	17.631	6	19064000	19064000	0.0258128	5			377
P46060;H0Y4Q3	Ran GTPase-activating protein 1	RANGAP1	sp|P46060|RAGP1_HUMAN Ran GTPase-activating protein 1 OS=Homo sapiens OX=9606 GN=RANGAP1 PE=1 SV=1	Homo sapiens	2	6	6	15.7	63.541	587	0	12.288	15.7	19004000	19004000	0.0257316	6			441
G8JLG1;Q14683;A0A6Q8PHC3;V9GY57	Structural maintenance of chromosomes protein;Structural maintenance of chromosomes protein 1A	SMC1A	tr|G8JLG1|G8JLG1_HUMAN Structural maintenance of chromosomes protein OS=Homo sapiens OX=9606 GN=SMC1A PE=1 SV=2;sp|Q14683|SMC1A_HUMAN Structural maintenance of chromosomes protein 1A OS=Homo sapiens OX=9606 GN=SMC1A PE=1 SV=2;tr|A0A6Q8PHC3|A0A6Q8PHC3_HUMAN	Homo sapiens	4	7	7	7.5	140.86	1211	0	54.488	7.5	18973000	18973000	0.0256896	10			222
Q8N4Q1	Mitochondrial intermembrane space import and assembly protein 40	CHCHD4	sp|Q8N4Q1|MIA40_HUMAN Mitochondrial intermembrane space import and assembly protein 40 OS=Homo sapiens OX=9606 GN=CHCHD4 PE=1 SV=1	Homo sapiens	1	1	1	14.1	15.996	142	0	6.2089	14.1	18911000	18911000	0.0256056	1			587
Q14444;G3V153;E9PLA9	Caprin-1	CAPRIN1	sp|Q14444|CAPR1_HUMAN Caprin-1 OS=Homo sapiens OX=9606 GN=CAPRIN1 PE=1 SV=2;tr|G3V153|G3V153_HUMAN Caprin-1 OS=Homo sapiens OX=9606 GN=CAPRIN1 PE=1 SV=1;tr|E9PLA9|E9PLA9_HUMAN Caprin-1 (Fragment) OS=Homo sapiens OX=9606 GN=CAPRIN1 PE=1 SV=1	Homo sapiens	3	5	5	13.7	78.365	709	0	15.952	13.7	18783000	18783000	0.0254323	6			536
J3QLH6;J3KRP2;J3QSA9;P62195;J3QRW1;J3QSE0;J3QQM1;J3QRR3	26S protease regulatory subunit 8	PSMC5	tr|J3QLH6|J3QLH6_HUMAN 26S proteasome regulatory subunit 8 (Fragment) OS=Homo sapiens OX=9606 GN=PSMC5 PE=1 SV=1;tr|J3KRP2|J3KRP2_HUMAN 26S proteasome regulatory subunit 8 (Fragment) OS=Homo sapiens OX=9606 GN=PSMC5 PE=1 SV=1;tr|J3QSA9|J3QSA9_HUMAN 26S pro	Homo sapiens	8	5	5	36.7	24.236	215	0	68.143	36.7	18760000	18760000	0.0254012	8			252
P49736;H0Y8E6;F8WDM3	DNA replication licensing factor MCM2	MCM2	sp|P49736|MCM2_HUMAN DNA replication licensing factor MCM2 OS=Homo sapiens OX=9606 GN=MCM2 PE=1 SV=4;tr|H0Y8E6|H0Y8E6_HUMAN DNA replication licensing factor MCM2 (Fragment) OS=Homo sapiens OX=9606 GN=MCM2 PE=1 SV=1	Homo sapiens	3	6	6	11.6	101.89	904	0	79.287	11.6	18589000	18589000	0.0251696	9			448
Q5VVC8;P62913	60S ribosomal protein L11	RPL11	tr|Q5VVC8|Q5VVC8_HUMAN 60S ribosomal protein L11 OS=Homo sapiens OX=9606 GN=RPL11 PE=1 SV=2;sp|P62913|RL11_HUMAN 60S ribosomal protein L11 OS=Homo sapiens OX=9606 GN=RPL11 PE=1 SV=2	Homo sapiens	2	1	1	8.4	19.024	167	0	9.8573	8.4	18520000	18520000	0.0250762	3			485
A0A0A0MRN5;Q9NZT2;A0A087X028	Opioid growth factor receptor	OGFR	tr|A0A0A0MRN5|A0A0A0MRN5_HUMAN Opioid growth factor receptor OS=Homo sapiens OX=9606 GN=OGFR PE=1 SV=1;sp|Q9NZT2|OGFR_HUMAN Opioid growth factor receptor OS=Homo sapiens OX=9606 GN=OGFR PE=1 SV=3	Homo sapiens	3	6	6	17.8	67.194	625	0	11.927	17.8	18285000	18285000	0.024758	7			37
P13674	Prolyl 4-hydroxylase subunit alpha-1	P4HA1	sp|P13674|P4HA1_HUMAN Prolyl 4-hydroxylase subunit alpha-1 OS=Homo sapiens OX=9606 GN=P4HA1 PE=1 SV=2	Homo sapiens	1	6	6	15.4	61.049	534	0	16.773	15.4	18139000	18139000	0.0245603	6			380
I3L397;I3L504;P63241;F8WCJ1;C9J7B5;C9J4W5;Q9GZV4;Q6IS14	Eukaryotic translation initiation factor 5A;Eukaryotic translation initiation factor 5A-1;Eukaryotic translation initiation factor 5A-2;Eukaryotic translation initiation factor 5A-1-like	EIF5A;EIF5A2;EIF5AL1	tr|I3L397|I3L397_HUMAN Eukaryotic translation initiation factor 5A (Fragment) OS=Homo sapiens OX=9606 GN=EIF5A PE=1 SV=8;tr|I3L504|I3L504_HUMAN Eukaryotic translation initiation factor 5A-1 OS=Homo sapiens OX=9606 GN=EIF5A PE=1 SV=1;sp|P63241|IF5A1_HUMAN E	Homo sapiens	8	6	6	50	16.019	146	0	38.246	50	17984000	17984000	0.0243505	8			245
F8VZJ2;H0YHX9;Q13765;E9PAV3;F8W1N5;F8VNW4;F8W0W4;F8VZ58;Q9BZK3	Nascent polypeptide-associated complex subunit alpha;Nascent polypeptide-associated complex subunit alpha, muscle-specific form	NACA	tr|F8VZJ2|F8VZJ2_HUMAN Nascent polypeptide-associated complex subunit alpha OS=Homo sapiens OX=9606 GN=NACA PE=1 SV=1;tr|H0YHX9|H0YHX9_HUMAN Nascent polypeptide-associated complex subunit alpha OS=Homo sapiens OX=9606 GN=NACA PE=1 SV=2;sp|Q13765|NACA_HUMAN	Homo sapiens	9	4	4	45.6	15.016	136	0	35.807	45.6	17778000	17778000	0.0240715	4			171
Q15717;M0QZR9;A0A494C0Q5;A0A494C0M6;A0A494C011;A0A494C173;B1AM48;A0A494C015;A0A494C1D9;A0A494C0F8;B1APY9;A0A494C147;A0A0A0MRX1;A0A0R4J2E6;Q12926;P26378	ELAV-like protein 1	ELAVL1	sp|Q15717|ELAV1_HUMAN ELAV-like protein 1 OS=Homo sapiens OX=9606 GN=ELAVL1 PE=1 SV=2;tr|M0QZR9|M0QZR9_HUMAN ELAV-like protein 1 OS=Homo sapiens OX=9606 GN=ELAVL1 PE=1 SV=1	Homo sapiens	16	4	4	21.5	36.091	326	0	40.342	21.5	17523000	17523000	0.0237263	8			555
Q71U36;P0DPH8;P0DPH7;A0A1W2PQM2;Q6PEY2;V9GZ17	Tubulin alpha-1A chain;Tubulin alpha-3E chain	TUBA1A;TUBA3E	sp|Q71U36|TBA1A_HUMAN Tubulin alpha-1A chain OS=Homo sapiens OX=9606 GN=TUBA1A PE=1 SV=1;sp|P0DPH8|TBA3D_HUMAN Tubulin alpha-3D chain OS=Homo sapiens OX=9606 GN=TUBA3D PE=1 SV=1;sp|P0DPH7|TBA3C_HUMAN Tubulin alpha-3C chain OS=Homo sapiens OX=9606 GN=TUBA3C	Homo sapiens	6	27	0	75.6	50.135	451	0	29.017	75.6	17102000	17102000	0.0231562	3			577
P60866;E5RIP1;E5RJX2;G3XAN0	40S ribosomal protein S20	RPS20	sp|P60866|RS20_HUMAN 40S ribosomal protein S20 OS=Homo sapiens OX=9606 GN=RPS20 PE=1 SV=1;tr|E5RIP1|E5RIP1_HUMAN 40S ribosomal protein S20 OS=Homo sapiens OX=9606 GN=RPS20 PE=1 SV=1;tr|E5RJX2|E5RJX2_HUMAN 40S ribosomal protein S20 OS=Homo sapiens OX=9606 G	Homo sapiens	4	2	2	25.2	13.373	119	0	7.3028	25.2	17099000	17099000	0.0231522	4			469
F5GX11;P25786;B4DEV8	Proteasome subunit alpha type-1	PSMA1	tr|F5GX11|F5GX11_HUMAN Proteasome subunit alpha type-1 OS=Homo sapiens OX=9606 GN=PSMA1 PE=1 SV=1;sp|P25786|PSA1_HUMAN Proteasome subunit alpha type-1 OS=Homo sapiens OX=9606 GN=PSMA1 PE=1 SV=1	Homo sapiens	3	6	6	27.3	26.505	238	0	12.443	27.3	16904000	16904000	0.0228881	7			195
Q15393	Splicing factor 3B subunit 3	SF3B3	sp|Q15393|SF3B3_HUMAN Splicing factor 3B subunit 3 OS=Homo sapiens OX=9606 GN=SF3B3 PE=1 SV=4	Homo sapiens	1	5	5	7.7	135.58	1217	0	19.998	7.7	16853000	16853000	0.0228191	8			550
C9J2Y9;P30876;C9J4M6	DNA-directed RNA polymerase;DNA-directed RNA polymerase II subunit RPB2	POLR2B	tr|C9J2Y9|C9J2Y9_HUMAN DNA-directed RNA polymerase subunit beta OS=Homo sapiens OX=9606 GN=POLR2B PE=1 SV=2;sp|P30876|RPB2_HUMAN DNA-directed RNA polymerase II subunit RPB2 OS=Homo sapiens OX=9606 GN=POLR2B PE=1 SV=1;tr|C9J4M6|C9J4M6_HUMAN DNA-directed RNA	Homo sapiens	3	6	6	7	133.06	1167	0	12.324	7	16853000	16853000	0.0228191	7			125
A0A087WYF6;F8W7U3;E7ESD2;Q641Q2;J3KP36;A0A0A0MR88;A0A096LPC5;Q9Y4E1;A0A0A0MT65	WASH complex subunit FAM21A;WASH complex subunit FAM21C	FAM21A;FAM21C	tr|A0A087WYF6|A0A087WYF6_HUMAN WASH complex subunit 2A OS=Homo sapiens OX=9606 GN=WASHC2A PE=1 SV=1;tr|F8W7U3|F8W7U3_HUMAN WASH complex subunit 2A OS=Homo sapiens OX=9606 GN=WASHC2A PE=1 SV=1;tr|E7ESD2|E7ESD2_HUMAN WASH complex subunit 2A OS=Homo sapiens O	Homo sapiens	9	8	8	11.5	136.57	1245	0	27.201	11.5	16816000	16816000	0.022769	10			22
A0A087WZG9;B4DSP0;A0A087WXK2;A0A087WUL4;A0A087WX23;Q86TG7;A0A087WYS2	Retrotransposon-derived protein PEG10	PEG10	tr|A0A087WZG9|A0A087WZG9_HUMAN Retrotransposon-derived protein PEG10 OS=Homo sapiens OX=9606 GN=PEG10 PE=1 SV=1;tr|B4DSP0|B4DSP0_HUMAN HCG1642748, isoform CRA_b OS=Homo sapiens OX=9606 GN=PEG10 PE=1 SV=1;tr|A0A087WXK2|A0A087WXK2_HUMAN Retrotransposon-deriv	Homo sapiens	7	3	3	14.2	40.471	359	0	50.22	14.2	16648000	16648000	0.0225415	6			10
A6NEL2	Ankyrin repeat domain-containing protein SOWAHB	SOWAHB	sp|A6NEL2|SWAHB_HUMAN Ankyrin repeat domain-containing protein SOWAHB OS=Homo sapiens OX=9606 GN=SOWAHB PE=1 SV=1	Homo sapiens	1	1	1	1.3	85.741	793	0.007657	1.5484	1.3	16443000	16443000	0.0222639	1			96
A0A087WX29;Q13148;K7EJ99;A0A0A0MSV7;K7EJM5;A0A1W2PNU8;A0A0A0N0M3;K7EN94;B1AKP7;G3V162;A0A087X260;A0A087WYY0	TAR DNA-binding protein 43	TARDBP	tr|A0A087WX29|A0A087WX29_HUMAN TAR DNA-binding protein 43 (Fragment) OS=Homo sapiens OX=9606 GN=TARDBP PE=1 SV=1;sp|Q13148|TADBP_HUMAN TAR DNA-binding protein 43 OS=Homo sapiens OX=9606 GN=TARDBP PE=1 SV=1	Homo sapiens	12	3	3	23.5	26.743	243	0	25.898	23.5	15880000	15880000	0.0215016	4			19
H0Y9Y4;D6RG13;P61247;D6RI02;D6R9B6;H0Y8L7;D6RB09;E9PFI5;D6RAT0	40S ribosomal protein S3a	RPS3A	tr|H0Y9Y4|H0Y9Y4_HUMAN 40S ribosomal protein S3a (Fragment) OS=Homo sapiens OX=9606 GN=RPS3A PE=1 SV=1;tr|D6RG13|D6RG13_HUMAN 40S ribosomal protein S3a (Fragment) OS=Homo sapiens OX=9606 GN=RPS3A PE=1 SV=1;sp|P61247|RS3A_HUMAN 40S ribosomal protein S3a OS=	Homo sapiens	9	2	2	10.6	23.528	208	0	17.07	10.6	15737000	15737000	0.021308	4			151
P52292;J3QLL0;J3KS65	Importin subunit alpha-1	KPNA2	sp|P52292|IMA1_HUMAN Importin subunit alpha-1 OS=Homo sapiens OX=9606 GN=KPNA2 PE=1 SV=1;tr|J3QLL0|J3QLL0_HUMAN Importin subunit alpha-1 (Fragment) OS=Homo sapiens OX=9606 GN=KPNA2 PE=1 SV=1;tr|J3KS65|J3KS65_HUMAN Importin subunit alpha-1 (Fragment) OS=Hom	Homo sapiens	3	8	8	19.5	57.861	529	0	219.39	19.5	15698000	15698000	0.0212552	12			455
P28066	Proteasome subunit alpha type-5	PSMA5	sp|P28066|PSA5_HUMAN Proteasome subunit alpha type-5 OS=Homo sapiens OX=9606 GN=PSMA5 PE=1 SV=3	Homo sapiens	1	6	6	36.9	26.411	241	0	60.116	36.9	15646000	15646000	0.0211848	6			413
Q16543;K7EL68;K7EIU0;K7EQA9	Hsp90 co-chaperone Cdc37;Hsp90 co-chaperone Cdc37, N-terminally processed	CDC37	sp|Q16543|CDC37_HUMAN Hsp90 co-chaperone Cdc37 OS=Homo sapiens OX=9606 GN=CDC37 PE=1 SV=1;tr|K7EL68|K7EL68_HUMAN Hsp90 co-chaperone Cdc37 (Fragment) OS=Homo sapiens OX=9606 GN=CDC37 PE=1 SV=1	Homo sapiens	4	3	3	13.2	44.468	378	0	60.176	13.2	14976000	14976000	0.0202776	5			558
P12004	Proliferating cell nuclear antigen	PCNA	sp|P12004|PCNA_HUMAN Proliferating cell nuclear antigen OS=Homo sapiens OX=9606 GN=PCNA PE=1 SV=1	Homo sapiens	1	3	3	17.2	28.768	261	0	14.252	17.2	14762000	14762000	0.0199879	6			372
C9JLU1;P52434	DNA-directed RNA polymerases I, II, and III subunit RPABC3	POLR2H	tr|C9JLU1|C9JLU1_HUMAN DNA-directed RNA polymerases I, II, and III subunit RPABC3 (Fragment) OS=Homo sapiens OX=9606 GN=POLR2H PE=1 SV=8;sp|P52434|RPAB3_HUMAN DNA-directed RNA polymerases I, II, and III subunit RPABC3 OS=Homo sapiens OX=9606 GN=POLR2H PE=1	Homo sapiens	2	1	1	8.1	16.925	148	0	5.1103	8.1	14686000	14686000	0.0198849	1			136
A0A087WZK0;P49366;Q5J8M5;M0R253;M0QX43;A0A3B3IU31;B4E3M2;M0R264;M0R0J4;M0QYZ7;M0R1T4;M0R1T2	Deoxyhypusine synthase	DHPS	tr|A0A087WZK0|A0A087WZK0_HUMAN Deoxyhypusine synthase OS=Homo sapiens OX=9606 GN=DHPS PE=1 SV=1;sp|P49366|DHYS_HUMAN Deoxyhypusine synthase OS=Homo sapiens OX=9606 GN=DHPS PE=1 SV=1;tr|Q5J8M5|Q5J8M5_HUMAN Deoxyhypusine synthase OS=Homo sapiens OX=9606 GN=D	Homo sapiens	12	4	4	20.8	41.114	370	0	58.31	20.8	14358000	14358000	0.0194408	6			24
P62906	60S ribosomal protein L10a	RPL10A	sp|P62906|RL10A_HUMAN 60S ribosomal protein L10a OS=Homo sapiens OX=9606 GN=RPL10A PE=1 SV=2	Homo sapiens	1	1	1	7.4	24.831	217	0	11.933	7.4	14318000	14318000	0.0193867	2			484
P17858	ATP-dependent 6-phosphofructokinase, liver type	PFKL	sp|P17858|PFKAL_HUMAN ATP-dependent 6-phosphofructokinase, liver type OS=Homo sapiens OX=9606 GN=PFKL PE=1 SV=6	Homo sapiens	1	5	5	11.2	85.018	780	0	8.4117	11.2	14248000	14248000	0.0192919	6			391
Q08J23;A0A140T9Y7	tRNA (cytosine(34)-C(5))-methyltransferase	NSUN2	sp|Q08J23|NSUN2_HUMAN RNA cytosine C(5)-methyltransferase NSUN2 OS=Homo sapiens OX=9606 GN=NSUN2 PE=1 SV=2	Homo sapiens	2	6	6	15.5	86.47	767	0	65.288	15.5	14167000	14167000	0.0191822	11			511
A0A2R8YDW2;A0A2R8Y4X2;A0A2R8YD40;A0A2R8YDJ9;A0A2R8Y425;A0A2R8Y5J0;A0A2R8YFK9;A0A2U3TZM0;A0A2R8YFD8;F5GWX5;A0A2R8Y212;A0A2R8Y521;A0A0C4DGG9;Q14839;A0A2R8Y5M9;A0A2R8Y7M9;A0A2R8Y7I0;A0A2R8YE38;A0A2R8YER1;A0A2R8Y8C1;A0A2R8Y445;K7EMY3;Q8TDI0;A0A2R8Y7X1;A0A2R8Y6G9;A0A5F9ZHX5;A0A2R8Y685;A0A2R8Y5Z7;Q12873	Chromodomain-helicase-DNA-binding protein 4	CHD4	tr|A0A2R8YDW2|A0A2R8YDW2_HUMAN Chromodomain-helicase-DNA-binding protein 4 (Fragment) OS=Homo sapiens OX=9606 GN=CHD4 PE=1 SV=1;tr|A0A2R8Y4X2|A0A2R8Y4X2_HUMAN Chromodomain-helicase-DNA-binding protein 4 (Fragment) OS=Homo sapiens OX=9606 GN=CHD4 PE=1 SV=1;	Homo sapiens	29	5	5	6.4	138.39	1215	0	26.128	6.4	14096000	14096000	0.0190861	7			44
Q15645	Pachytene checkpoint protein 2 homolog	TRIP13	sp|Q15645|PCH2_HUMAN Pachytene checkpoint protein 2 homolog OS=Homo sapiens OX=9606 GN=TRIP13 PE=1 SV=2	Homo sapiens	1	2	2	9	48.55	432	0	3.0234	9	13985000	13985000	0.0189358	1			553
Q9UNZ2;F2Z2K0;R4GNE6	NSFL1 cofactor p47	NSFL1C	sp|Q9UNZ2|NSF1C_HUMAN NSFL1 cofactor p47 OS=Homo sapiens OX=9606 GN=NSFL1C PE=1 SV=2;tr|F2Z2K0|F2Z2K0_HUMAN NSFL1 cofactor p47 OS=Homo sapiens OX=9606 GN=NSFL1C PE=1 SV=1	Homo sapiens	3	6	6	26.2	40.572	370	0	84.318	26.2	13976000	13976000	0.0189236	9			648
Q14C86;F8W9S7;H0Y7I9;C9IZ08;B4DGD8;H0Y4E7;A0A0A0MQV8;B0QZ65	GTPase-activating protein and VPS9 domain-containing protein 1	GAPVD1	sp|Q14C86|GAPD1_HUMAN GTPase-activating protein and VPS9 domain-containing protein 1 OS=Homo sapiens OX=9606 GN=GAPVD1 PE=1 SV=2;tr|F8W9S7|F8W9S7_HUMAN GTPase-activating protein and VPS9 domain-containing protein 1 OS=Homo sapiens OX=9606 GN=GAPVD1 PE=1 SV	Homo sapiens	8	6	6	8.3	164.98	1478	0	105.09	8.3	13833000	13833000	0.01873	9			542
D6RB01;Q9Y6X4	Soluble lamin-associated protein of 75 kDa	FAM169A	tr|D6RB01|D6RB01_HUMAN Soluble lamin-associated protein of 75 kDa OS=Homo sapiens OX=9606 GN=FAM169A PE=1 SV=1;sp|Q9Y6X4|F169A_HUMAN Soluble lamin-associated protein of 75 kDa OS=Homo sapiens OX=9606 GN=FAM169A PE=1 SV=2	Homo sapiens	2	6	6	18.4	68.054	610	0	119.42	18.4	13815000	13815000	0.0187056	9			149
Q96K76	Ubiquitin carboxyl-terminal hydrolase 47	USP47	sp|Q96K76|UBP47_HUMAN Ubiquitin carboxyl-terminal hydrolase 47 OS=Homo sapiens OX=9606 GN=USP47 PE=1 SV=3	Homo sapiens	1	5	5	5.1	157.31	1375	0	48.22	5.1	13672000	13672000	0.018512	8			609
P16152;E9PQ63;A8MTM1	Carbonyl reductase [NADPH] 1	CBR1	sp|P16152|CBR1_HUMAN Carbonyl reductase [NADPH] 1 OS=Homo sapiens OX=9606 GN=CBR1 PE=1 SV=3;tr|E9PQ63|E9PQ63_HUMAN Carbonyl reductase [NADPH] 1 OS=Homo sapiens OX=9606 GN=CBR1 PE=1 SV=1;tr|A8MTM1|A8MTM1_HUMAN Carbonyl reductase [NADPH] 1 OS=Homo sapiens OX	Homo sapiens	3	6	6	27.4	30.375	277	0	87.884	27.4	13647000	13647000	0.0184781	10			386
P50991	T-complex protein 1 subunit delta	CCT4	sp|P50991|TCPD_HUMAN T-complex protein 1 subunit delta OS=Homo sapiens OX=9606 GN=CCT4 PE=1 SV=4	Homo sapiens	1	3	3	8.5	57.924	539	0	7.7846	8.5	13565000	13565000	0.0183671	4			451
P19387	DNA-directed RNA polymerase II subunit RPB3	POLR2C	sp|P19387|RPB3_HUMAN DNA-directed RNA polymerase II subunit RPB3 OS=Homo sapiens OX=9606 GN=POLR2C PE=1 SV=2	Homo sapiens	1	2	2	14.9	31.441	275	0	30.312	14.9	13160000	13160000	0.0178187	4			394
Q13045;K7EQZ7;J3KS54	Protein flightless-1 homolog	FLII	sp|Q13045|FLII_HUMAN Protein flightless-1 homolog OS=Homo sapiens OX=9606 GN=FLII PE=1 SV=2	Homo sapiens	3	5	5	5.4	144.75	1269	0	42.928	5.4	13031000	13031000	0.0176441	7			519
P33993;C9J8M6	DNA replication licensing factor MCM7	MCM7	sp|P33993|MCM7_HUMAN DNA replication licensing factor MCM7 OS=Homo sapiens OX=9606 GN=MCM7 PE=1 SV=4	Homo sapiens	2	5	5	9.5	81.307	719	0	35.881	9.5	12851000	12851000	0.0174003	6			422
D6RHH4;J3KPE3;P63244;H0Y8R5;D6RFX4;H0YAF8;D6R9Z1;H0YAM7;D6RAC2;H0Y8W2;D6R9L0;D6RHJ5;D6RF23;D6RAU2;E9PD14;D6RBD0;D6RFZ9;D6REE5	Guanine nucleotide-binding protein subunit beta-2-like 1;Guanine nucleotide-binding protein subunit beta-2-like 1, N-terminally processed	GNB2L1	tr|D6RHH4|D6RHH4_HUMAN Receptor of-activated protein C kinase 1 OS=Homo sapiens OX=9606 GN=RACK1 PE=1 SV=1;tr|J3KPE3|J3KPE3_HUMAN Receptor of-activated protein C kinase 1 OS=Homo sapiens OX=9606 GN=RACK1 PE=1 SV=1;sp|P63244|RACK1_HUMAN Receptor of activate	Homo sapiens	18	3	3	19.3	25.869	233	0	11.229	19.3	12814000	12814000	0.0173502	4			152
A0A2R8Y5A0;A0A2R8YF43;A0A2R8YD58;E7EU96;Q8NEV1;P68400;A0A087WY74;A0A2R8YDP2;A0A2R8YFU2;A0A2R8YEW1;V9GYA2;A0A2R8Y4D6;A0A2R8Y4H0	Casein kinase II subunit alpha 3;Casein kinase II subunit alpha	CSNK2A1;CSNK2A3	tr|A0A2R8Y5A0|A0A2R8Y5A0_HUMAN Casein kinase II subunit alpha OS=Homo sapiens OX=9606 GN=CSNK2A1 PE=1 SV=1;tr|A0A2R8YF43|A0A2R8YF43_HUMAN Casein kinase II subunit alpha OS=Homo sapiens OX=9606 GN=CSNK2A1 PE=1 SV=1;tr|A0A2R8YD58|A0A2R8YD58_HUMAN Casein kina	Homo sapiens	13	5	5	17.5	40.717	354	0	55.032	17.5	12785000	12785000	0.017311	4			70
Q9NRX4	14 kDa phosphohistidine phosphatase	PHPT1	sp|Q9NRX4|PHP14_HUMAN 14 kDa phosphohistidine phosphatase OS=Homo sapiens OX=9606 GN=PHPT1 PE=1 SV=1	Homo sapiens	1	5	5	59.2	13.832	125	0	36.245	59.2	12696000	12696000	0.0171905	9			632
A0A3B3IS57;A0A3B3IU45;A0A3B3IT92;P33991;A0A3B3ITP6;E5RG31;A0A494C100;Q9UJA3	DNA replication licensing factor MCM4	MCM4	tr|A0A3B3IS57|A0A3B3IS57_HUMAN DNA helicase OS=Homo sapiens OX=9606 GN=MCM4 PE=1 SV=1;tr|A0A3B3IU45|A0A3B3IU45_HUMAN DNA helicase OS=Homo sapiens OX=9606 GN=MCM4 PE=1 SV=1;tr|A0A3B3IT92|A0A3B3IT92_HUMAN DNA helicase OS=Homo sapiens OX=9606 GN=MCM4 PE=1 SV=	Homo sapiens	8	6	6	11.1	83.76	749	0	27.422	11.1	12689000	12689000	0.017181	8			79
Q9BZQ8	Protein Niban	FAM129A	sp|Q9BZQ8|NIBA1_HUMAN Protein Niban 1 OS=Homo sapiens OX=9606 GN=NIBAN1 PE=1 SV=1	Homo sapiens	1	3	3	5.5	103.13	928	0	40.204	5.5	12610000	12610000	0.017074	7			624
A0A3B3ITT5;P47914	60S ribosomal protein L29	RPL29	tr|A0A3B3ITT5|A0A3B3ITT5_HUMAN 60S ribosomal protein L29 OS=Homo sapiens OX=9606 GN=RPL29 PE=1 SV=1;sp|P47914|RL29_HUMAN 60S ribosomal protein L29 OS=Homo sapiens OX=9606 GN=RPL29 PE=1 SV=2	Homo sapiens	2	2	2	13.8	18.512	167	0	9.8432	13.8	12581000	12581000	0.0170348	2			81
Q5JSK8;Q5JSL0;Q5JSK6;P82970;Q5JSK7;Q5JSK9	High mobility group nucleosome-binding domain-containing protein 5	HMGN5	tr|Q5JSK8|Q5JSK8_HUMAN High mobility group nucleosome-binding domain-containing protein 5 (Fragment) OS=Homo sapiens OX=9606 GN=HMGN5 PE=1 SV=1;tr|Q5JSL0|Q5JSL0_HUMAN High mobility group nucleosome-binding domain-containing protein 5 (Fragment) OS=Homo sap	Homo sapiens	6	4	4	63.7	11.363	102	0	27.548	63.7	12410000	12410000	0.0168032	6			498
Q7KZ85	Transcription elongation factor SPT6	SUPT6H	sp|Q7KZ85|SPT6H_HUMAN Transcription elongation factor SPT6 OS=Homo sapiens OX=9606 GN=SUPT6H PE=1 SV=2	Homo sapiens	1	9	9	8.5	199.07	1726	0	29.917	8.5	12380000	12380000	0.0167626	10			578
H0YLA2;P37108	Signal recognition particle 14 kDa protein	SRP14	tr|H0YLA2|H0YLA2_HUMAN Signal recognition particle 14 kDa protein OS=Homo sapiens OX=9606 GN=SRP14 PE=1 SV=1;sp|P37108|SRP14_HUMAN Signal recognition particle 14 kDa protein OS=Homo sapiens OX=9606 GN=SRP14 PE=1 SV=2	Homo sapiens	2	3	3	35.7	13.058	115	0	44.304	35.7	12360000	12360000	0.0167355	4			234
H0Y8G5;D6RF44;H0YA96;D6RAF8;Q14103;D6RBQ9;D6RD83	Heterogeneous nuclear ribonucleoprotein D0	HNRNPD	tr|H0Y8G5|H0Y8G5_HUMAN Heterogeneous nuclear ribonucleoprotein D0 (Fragment) OS=Homo sapiens OX=9606 GN=HNRNPD PE=1 SV=8;tr|D6RF44|D6RF44_HUMAN Heterogeneous nuclear ribonucleoprotein D0 (Fragment) OS=Homo sapiens OX=9606 GN=HNRNPD PE=1 SV=8;tr|H0YA96|H0YA	Homo sapiens	7	5	2	22.3	29.667	260	0	5.9126	15.4	12354000	12354000	0.0167274	1			226
P17661	Desmin	DES	sp|P17661|DESM_HUMAN Desmin OS=Homo sapiens OX=9606 GN=DES PE=1 SV=3	Homo sapiens	1	5	1	7.2	53.535	470	0	4.0689	7.2	12183000	12183000	0.0164959	1			390
O60502;H7C3X0	Protein O-GlcNAcase	MGEA5	sp|O60502|OGA_HUMAN Protein O-GlcNAcase OS=Homo sapiens OX=9606 GN=OGA PE=1 SV=2	Homo sapiens	2	5	5	6.1	102.91	916	0	30.487	6.1	12054000	12054000	0.0163212	6			318
Q14974;J3QR48;J3KTM9	Importin subunit beta-1	KPNB1	sp|Q14974|IMB1_HUMAN Importin subunit beta-1 OS=Homo sapiens OX=9606 GN=KPNB1 PE=1 SV=2;tr|J3QR48|J3QR48_HUMAN Importin subunit beta-1 (Fragment) OS=Homo sapiens OX=9606 GN=KPNB1 PE=1 SV=8	Homo sapiens	3	5	5	7.1	97.169	876	0	79.467	7.1	12034000	12034000	0.0162941	8			541
P78527	DNA-dependent protein kinase catalytic subunit	PRKDC	sp|P78527|PRKDC_HUMAN DNA-dependent protein kinase catalytic subunit OS=Homo sapiens OX=9606 GN=PRKDC PE=1 SV=3	Homo sapiens	1	4	4	1.8	469.08	4128	0	11.747	1.8	11954000	11954000	0.0161858	3			497
P41091;Q2VIR3;H7BZU1	Eukaryotic translation initiation factor 2 subunit 3;Putative eukaryotic translation initiation factor 2 subunit 3-like protein	EIF2S3;EIF2S3L	sp|P41091|IF2G_HUMAN Eukaryotic translation initiation factor 2 subunit 3 OS=Homo sapiens OX=9606 GN=EIF2S3 PE=1 SV=3;sp|Q2VIR3|IF2GL_HUMAN Eukaryotic translation initiation factor 2 subunit 3B OS=Homo sapiens OX=9606 GN=EIF2S3B PE=2 SV=2	Homo sapiens	3	6	6	18	51.109	472	0	56.228	18	11937000	11937000	0.0161628	10			435
P28072;I3L3X7;A0A087X2I4	Proteasome subunit beta type-6	PSMB6	sp|P28072|PSB6_HUMAN Proteasome subunit beta type-6 OS=Homo sapiens OX=9606 GN=PSMB6 PE=1 SV=4	Homo sapiens	3	3	3	17.6	25.357	239	0	10.236	17.6	11808000	11808000	0.0159881	4			415
Q9UQE7	Structural maintenance of chromosomes protein 3	SMC3	sp|Q9UQE7|SMC3_HUMAN Structural maintenance of chromosomes protein 3 OS=Homo sapiens OX=9606 GN=SMC3 PE=1 SV=2	Homo sapiens	1	6	6	5.3	141.54	1217	0	244.01	5.3	11782000	11782000	0.0159529	7			651
H0YN88;A0A075B716;H3BNC9;P08708;H0YN73	40S ribosomal protein S17	RPS17	tr|H0YN88|H0YN88_HUMAN 40S ribosomal protein S17 OS=Homo sapiens OX=9606 GN=RPS17 PE=1 SV=1;tr|A0A075B716|A0A075B716_HUMAN 40S ribosomal protein S17 OS=Homo sapiens OX=9606 GN=RPS17 PE=1 SV=1;tr|H3BNC9|H3BNC9_HUMAN 40S ribosomal protein S17 OS=Homo sapiens	Homo sapiens	5	3	3	33.8	15.919	136	0	6.7676	33.8	11604000	11604000	0.0157119	4			2
P09874	Poly [ADP-ribose] polymerase 1	PARP1	sp|P09874|PARP1_HUMAN Poly [ADP-ribose] polymerase 1 OS=Homo sapiens OX=9606 GN=PARP1 PE=1 SV=4	Homo sapiens	1	3	3	3.6	113.08	1014	0	21.595	3.6	11540000	11540000	0.0156252	3			362
M0R0F0;P46782;M0QZN2;M0R0R2	40S ribosomal protein S5;40S ribosomal protein S5, N-terminally processed	RPS5	tr|M0R0F0|M0R0F0_HUMAN 40S ribosomal protein S5 (Fragment) OS=Homo sapiens OX=9606 GN=RPS5 PE=1 SV=1;sp|P46782|RS5_HUMAN 40S ribosomal protein S5 OS=Homo sapiens OX=9606 GN=RPS5 PE=1 SV=4;tr|M0QZN2|M0QZN2_HUMAN 40S ribosomal protein S5 OS=Homo sapiens OX=9	Homo sapiens	4	3	3	24	22.391	200	0	64.532	24	11537000	11537000	0.0156212	8			288
Q9Y3U8;J3QSB5;J3KTD3	60S ribosomal protein L36	RPL36	sp|Q9Y3U8|RL36_HUMAN 60S ribosomal protein L36 OS=Homo sapiens OX=9606 GN=RPL36 PE=1 SV=3;tr|J3QSB5|J3QSB5_HUMAN 60S ribosomal protein L36 OS=Homo sapiens OX=9606 GN=RPL36 PE=1 SV=1	Homo sapiens	3	3	3	31.4	12.254	105	0	4.9263	31.4	11512000	11512000	0.0155873	3			656
H3BQZ9;P07741;H3BSW3;H3BQF1;H3BQB1	Adenine phosphoribosyltransferase	APRT	tr|H3BQZ9|H3BQZ9_HUMAN Adenine phosphoribosyltransferase OS=Homo sapiens OX=9606 GN=APRT PE=1 SV=1;sp|P07741|APT_HUMAN Adenine phosphoribosyltransferase OS=Homo sapiens OX=9606 GN=APRT PE=1 SV=2;tr|H3BSW3|H3BSW3_HUMAN Adenine phosphoribosyltransferase OS=H	Homo sapiens	5	5	5	30.7	16.616	153	0	9.9984	30.7	11392000	11392000	0.0154248	5			238
A0A3B3ISC6;A0A3B3IT15;A0A3B3IS84;P53621;A0A3B3ITI7;A0A3B3IU89;A0A3B3ISK1;A0A3B3ITV3	Coatomer subunit alpha;Xenin;Proxenin	COPA	tr|A0A3B3ISC6|A0A3B3ISC6_HUMAN Coatomer subunit alpha (Fragment) OS=Homo sapiens OX=9606 GN=COPA PE=1 SV=1;tr|A0A3B3IT15|A0A3B3IT15_HUMAN Coatomer subunit alpha OS=Homo sapiens OX=9606 GN=COPA PE=1 SV=1;tr|A0A3B3IS84|A0A3B3IS84_HUMAN Coatomer subunit alpha	Homo sapiens	8	6	6	7.5	114.87	1024	0	53.525	7.5	11191000	11191000	0.0151527	7			80
H0YEN5;E9PQD7;P15880	40S ribosomal protein S2	RPS2	tr|H0YEN5|H0YEN5_HUMAN 40S ribosomal protein S2 (Fragment) OS=Homo sapiens OX=9606 GN=RPS2 PE=1 SV=1;tr|E9PQD7|E9PQD7_HUMAN 40S ribosomal protein S2 OS=Homo sapiens OX=9606 GN=RPS2 PE=1 SV=1;sp|P15880|RS2_HUMAN 40S ribosomal protein S2 OS=Homo sapiens OX=9	Homo sapiens	3	3	3	17.4	21.154	195	0	8.8408	17.4	11125000	11125000	0.0150633	4			192
Q9H307	Pinin	PNN	sp|Q9H307|PININ_HUMAN Pinin OS=Homo sapiens OX=9606 GN=PNN PE=1 SV=5	Homo sapiens	1	2	2	5.9	81.627	717	0	27.354	5.9	10828000	10828000	0.0146612	4			627
A0A087X2D0;P84103;A0A0B4J1Z1;C9JAB2;Q16629	Serine/arginine-rich splicing factor 3;Serine/arginine-rich splicing factor 7	SRSF3;SRSF7	tr|A0A087X2D0|A0A087X2D0_HUMAN Serine/arginine-rich-splicing factor 3 OS=Homo sapiens OX=9606 GN=SRSF3 PE=1 SV=1;sp|P84103|SRSF3_HUMAN Serine/arginine-rich splicing factor 3 OS=Homo sapiens OX=9606 GN=SRSF3 PE=1 SV=1;tr|A0A0B4J1Z1|A0A0B4J1Z1_HUMAN Serine/a	Homo sapiens	5	2	2	24.2	10.32	95	0	6.477	24.2	10800000	10800000	0.0146233	2			31
F8VPD4;P27708;H7BZB3	CAD protein;Glutamine-dependent carbamoyl-phosphate synthase;Aspartate carbamoyltransferase;Dihydroorotase	CAD	tr|F8VPD4|F8VPD4_HUMAN Aspartate carbamoyltransferase OS=Homo sapiens OX=9606 GN=CAD PE=1 SV=1;sp|P27708|PYR1_HUMAN CAD protein OS=Homo sapiens OX=9606 GN=CAD PE=1 SV=3	Homo sapiens	3	6	6	3.8	236.02	2162	0	30.058	3.8	10600000	10600000	0.0143525	9			205
F8WAX8;P52701;F8W7G9;A0A087WWJ1	DNA mismatch repair protein Msh6	MSH6	tr|F8WAX8|F8WAX8_HUMAN DNA mismatch repair protein Msh6 OS=Homo sapiens OX=9606 GN=MSH6 PE=1 SV=1;sp|P52701|MSH6_HUMAN DNA mismatch repair protein Msh6 OS=Homo sapiens OX=9606 GN=MSH6 PE=1 SV=2;tr|F8W7G9|F8W7G9_HUMAN DNA mismatch repair protein Msh6 OS=Hom	Homo sapiens	4	2	2	31.2	17.308	160	0	6.3912	31.2	10431000	10431000	0.0141236	4			212
H0Y9R4;A0A2R8Y5Y7;P32969;H0Y9V9;D6RAN4	60S ribosomal protein L9	RPL9	tr|H0Y9R4|H0Y9R4_HUMAN 60S ribosomal protein L9 (Fragment) OS=Homo sapiens OX=9606 GN=RPL9 PE=1 SV=2;tr|A0A2R8Y5Y7|A0A2R8Y5Y7_HUMAN 60S ribosomal protein L9 OS=Homo sapiens OX=9606 GN=RPL9 PE=1 SV=1;sp|P32969|RL9_HUMAN 60S ribosomal protein L9 OS=Homo sapi	Homo sapiens	5	6	6	63.3	10.045	90	0	78.123	63.3	10411000	10411000	0.0140966	7			72
B4DFG0;H0Y993;P35659;H0Y8X0;A0A494C198;A0A494C028;D6RDA2;D6R9L5	Protein DEK	DEK	tr|B4DFG0|B4DFG0_HUMAN Protein DEK OS=Homo sapiens OX=9606 GN=DEK PE=1 SV=1;tr|H0Y993|H0Y993_HUMAN DEK oncogene (DNA binding), isoform CRA_b OS=Homo sapiens OX=9606 GN=DEK PE=1 SV=2;sp|P35659|DEK_HUMAN Protein DEK OS=Homo sapiens OX=9606 GN=DEK PE=1 SV=1;t	Homo sapiens	8	4	4	17.6	39.5	347	0	12.854	17.6	10304000	10304000	0.0139517	6			113
Q9NRL3;F5GYK2;M0R317;M0R2A7;M0QYS2;M0R0P4;R4GN16;M0QZM0	Striatin-4	STRN4	sp|Q9NRL3|STRN4_HUMAN Striatin-4 OS=Homo sapiens OX=9606 GN=STRN4 PE=1 SV=2;tr|F5GYK2|F5GYK2_HUMAN Striatin-4 OS=Homo sapiens OX=9606 GN=STRN4 PE=1 SV=1;tr|M0R317|M0R317_HUMAN Striatin-4 (Fragment) OS=Homo sapiens OX=9606 GN=STRN4 PE=1 SV=1	Homo sapiens	8	4	4	14.9	80.595	753	0	12.867	14.9	10154000	10154000	0.0137486	5			631
O75717	WD repeat and HMG-box DNA-binding protein 1	WDHD1	sp|O75717|WDHD1_HUMAN WD repeat and HMG-box DNA-binding protein 1 OS=Homo sapiens OX=9606 GN=WDHD1 PE=1 SV=1	Homo sapiens	1	4	4	5.7	125.97	1129	0	24.186	5.7	10120000	10120000	0.0137026	4			326
Q13151	Heterogeneous nuclear ribonucleoprotein A0	HNRNPA0	sp|Q13151|ROA0_HUMAN Heterogeneous nuclear ribonucleoprotein A0 OS=Homo sapiens OX=9606 GN=HNRNPA0 PE=1 SV=1	Homo sapiens	1	4	4	20	30.84	305	0	15.455	20	10006000	10006000	0.0135482	8			520
P00558;P07205	Phosphoglycerate kinase 1	PGK1	sp|P00558|PGK1_HUMAN Phosphoglycerate kinase 1 OS=Homo sapiens OX=9606 GN=PGK1 PE=1 SV=3	Homo sapiens	2	5	5	15.8	44.614	417	0	48.639	15.8	9870900	9870900	0.0133653	7			340
P62805	Histone H4	HIST1H4A	sp|P62805|H4_HUMAN Histone H4 OS=Homo sapiens OX=9606 GN=H4C1 PE=1 SV=2	Homo sapiens	1	2	2	17.5	11.367	103	0	4.4593	17.5	9849400	9849400	0.0133362	3			481
E9PM69;R4GNH3;P17980;E9PMD8;E9PLG2;E9PN50;E9PKD5	26S protease regulatory subunit 6A	PSMC3	tr|E9PM69|E9PM69_HUMAN 26S proteasome regulatory subunit 6A OS=Homo sapiens OX=9606 GN=PSMC3 PE=1 SV=1;tr|R4GNH3|R4GNH3_HUMAN 26S proteasome regulatory subunit 6A OS=Homo sapiens OX=9606 GN=PSMC3 PE=1 SV=1;sp|P17980|PRS6A_HUMAN 26S proteasome regulatory su	Homo sapiens	7	4	4	18.9	44.323	397	0	7.6777	18.9	9833400	9833400	0.0133145	5			188
P10155;H0Y9N5;G5E9R9	60 kDa SS-A/Ro ribonucleoprotein	TROVE2	sp|P10155|RO60_HUMAN 60 kDa SS-A/Ro ribonucleoprotein OS=Homo sapiens OX=9606 GN=RO60 PE=1 SV=2	Homo sapiens	3	4	4	12.6	60.67	538	0	13.927	12.6	9831400	9831400	0.0133118	8			364
P46783;Q9NQ39	40S ribosomal protein S10;Putative 40S ribosomal protein S10-like	RPS10;RPS10P5	sp|P46783|RS10_HUMAN 40S ribosomal protein S10 OS=Homo sapiens OX=9606 GN=RPS10 PE=1 SV=1;sp|Q9NQ39|RS10L_HUMAN Putative 40S ribosomal protein S10-like OS=Homo sapiens OX=9606 GN=RPS10P5 PE=5 SV=1	Homo sapiens	2	1	1	8.5	18.898	165	0	4.2386	8.5	9678300	9678300	0.0131045	1			442
E7ENZ3;P48643;B7ZAR1;E9PCA1;D6RIZ7	T-complex protein 1 subunit epsilon	CCT5	tr|E7ENZ3|E7ENZ3_HUMAN T-complex protein 1 subunit epsilon OS=Homo sapiens OX=9606 GN=CCT5 PE=1 SV=1;sp|P48643|TCPE_HUMAN T-complex protein 1 subunit epsilon OS=Homo sapiens OX=9606 GN=CCT5 PE=1 SV=1;tr|B7ZAR1|B7ZAR1_HUMAN T-complex protein 1 subunit epsil	Homo sapiens	5	5	5	18.5	53.848	486	0	50.389	18.5	9636100	9636100	0.0130473	7			163
P25398	40S ribosomal protein S12	RPS12	sp|P25398|RS12_HUMAN 40S ribosomal protein S12 OS=Homo sapiens OX=9606 GN=RPS12 PE=1 SV=3	Homo sapiens	1	4	4	43.2	14.515	132	0	29.386	43.2	9569100	9569100	0.0129566	5			405
F6RU00;B4DQA8;K7EJC8;E9PCW1;G5E9T8;O95249	Golgi SNAP receptor complex member 1	GOSR1	tr|F6RU00|F6RU00_HUMAN Golgi SNAP receptor complex member 1 OS=Homo sapiens OX=9606 GN=GOSR1 PE=1 SV=1;tr|B4DQA8|B4DQA8_HUMAN 28 kDa Golgi SNARE protein OS=Homo sapiens OX=9606 GN=GOSR1 PE=1 SV=1;tr|K7EJC8|K7EJC8_HUMAN Golgi SNAP receptor complex member 1	Homo sapiens	6	1	1	11.1	9.4134	81	0.0017007	2.191	11.1	9214100	9214100	0.012476	1			116
O43242;F5H8K4	26S proteasome non-ATPase regulatory subunit 3	PSMD3	sp|O43242|PSMD3_HUMAN 26S proteasome non-ATPase regulatory subunit 3 OS=Homo sapiens OX=9606 GN=PSMD3 PE=1 SV=2;tr|F5H8K4|F5H8K4_HUMAN 26S proteasome non-ATPase regulatory subunit 3 OS=Homo sapiens OX=9606 GN=PSMD3 PE=1 SV=2	Homo sapiens	2	2	2	7.1	60.977	534	0	7.2596	7.1	9207800	9207800	0.0124674	5			308
O43491;E9PMV8;H0Y5B0;Q6R5J7;E9PK52;E9PHY5;E9PII3;A0A2R8Y5B3	Band 4.1-like protein 2	EPB41L2	sp|O43491|E41L2_HUMAN Band 4.1-like protein 2 OS=Homo sapiens OX=9606 GN=EPB41L2 PE=1 SV=1;tr|E9PMV8|E9PMV8_HUMAN Band 4.1-like protein 2 (Fragment) OS=Homo sapiens OX=9606 GN=EPB41L2 PE=1 SV=1;tr|H0Y5B0|H0Y5B0_HUMAN Band 4.1-like protein 2 (Fragment) OS=H	Homo sapiens	8	3	3	6.9	112.59	1005	0	6.9686	6.9	9205000	9205000	0.0124636	2			310
P14174	Macrophage migration inhibitory factor	MIF	sp|P14174|MIF_HUMAN Macrophage migration inhibitory factor OS=Homo sapiens OX=9606 GN=MIF PE=1 SV=4	Homo sapiens	1	2	2	17.4	12.476	115	0	10.597	17.4	9137400	9137400	0.0123721	3			381
I3L3P7;P62244;H3BV27;H3BT37;I3L303;I3L246;H3BVC7;H3BN98	40S ribosomal protein S15a	RPS15A	tr|I3L3P7|I3L3P7_HUMAN 40S ribosomal protein S15a OS=Homo sapiens OX=9606 GN=RPS15A PE=1 SV=1;sp|P62244|RS15A_HUMAN 40S ribosomal protein S15a OS=Homo sapiens OX=9606 GN=RPS15A PE=1 SV=2;tr|H3BV27|H3BV27_HUMAN 40S ribosomal protein S15a OS=Homo sapiens OX=	Homo sapiens	8	3	3	20	11.477	100	0	3.9576	20	9090800	9090800	0.012309	4			247
C9JG97;C9JEH3;Q13685;H7C0R2;C9JTS3	Angio-associated migratory cell protein	AAMP	tr|C9JG97|C9JG97_HUMAN Angio-associated migratory cell protein OS=Homo sapiens OX=9606 GN=AAMP PE=1 SV=1;tr|C9JEH3|C9JEH3_HUMAN Angio-associated migratory cell protein OS=Homo sapiens OX=9606 GN=AAMP PE=1 SV=1;sp|Q13685|AAMP_HUMAN Angio-associated migrator	Homo sapiens	5	3	3	12.3	44.693	415	0	4.7078	12.3	9072900	9072900	0.0122848	2			132
P38117;M0QY67	Electron transfer flavoprotein subunit beta	ETFB	sp|P38117|ETFB_HUMAN Electron transfer flavoprotein subunit beta OS=Homo sapiens OX=9606 GN=ETFB PE=1 SV=3;tr|M0QY67|M0QY67_HUMAN Electron transfer flavoprotein subunit beta (Fragment) OS=Homo sapiens OX=9606 GN=ETFB PE=1 SV=1	Homo sapiens	2	2	2	11	27.843	255	0	15.962	11	8994700	8994700	0.0121789	1			429
O94992	Protein HEXIM1	HEXIM1	sp|O94992|HEXI1_HUMAN Protein HEXIM1 OS=Homo sapiens OX=9606 GN=HEXIM1 PE=1 SV=1	Homo sapiens	1	1	1	4.7	40.623	359	0	8.041	4.7	8955800	8955800	0.0121262	2			334
P35606;H0YAC7	Coatomer subunit beta	COPB2	sp|P35606|COPB2_HUMAN Coatomer subunit beta OS=Homo sapiens OX=9606 GN=COPB2 PE=1 SV=2	Homo sapiens	2	5	5	8.9	102.49	906	0	88.462	8.9	8875500	8875500	0.0120175	6			423
O14818;Q8TAA3;F5GY34;H0Y586;A0A087WYS6	Proteasome subunit alpha type-7;Proteasome subunit alpha type-7-like	PSMA7;PSMA8	sp|O14818|PSA7_HUMAN Proteasome subunit alpha type-7 OS=Homo sapiens OX=9606 GN=PSMA7 PE=1 SV=1;sp|Q8TAA3|PSMA8_HUMAN Proteasome subunit alpha-type 8 OS=Homo sapiens OX=9606 GN=PSMA8 PE=2 SV=3;tr|F5GY34|F5GY34_HUMAN Proteasome subunit alpha-type 8 OS=Homo	Homo sapiens	5	3	3	14.9	27.887	248	0	58.156	14.9	8842500	8842500	0.0119728	3			304
P38646	Stress-70 protein, mitochondrial	HSPA9	sp|P38646|GRP75_HUMAN Stress-70 protein, mitochondrial OS=Homo sapiens OX=9606 GN=HSPA9 PE=1 SV=2	Homo sapiens	1	3	3	6.3	73.68	679	0	55.429	6.3	8809300	8809300	0.0119279	3			430
P22102;C9JZG2;C9JKQ7;C9JBJ1;C9JTV6;F8WD69	Trifunctional purine biosynthetic protein adenosine-3;Phosphoribosylamine--glycine ligase;Phosphoribosylformylglycinamidine cyclo-ligase;Phosphoribosylglycinamide formyltransferase	GART	sp|P22102|PUR2_HUMAN Trifunctional purine biosynthetic protein adenosine-3 OS=Homo sapiens OX=9606 GN=GART PE=1 SV=1;tr|C9JZG2|C9JZG2_HUMAN Trifunctional purine biosynthetic protein adenosine-3 (Fragment) OS=Homo sapiens OX=9606 GN=GART PE=1 SV=1;tr|C9JKQ7	Homo sapiens	6	4	4	6	107.77	1010	0	10.945	6	8801100	8801100	0.0119168	4			398
O14617;A0A2R8Y611	AP-3 complex subunit delta-1	AP3D1	sp|O14617|AP3D1_HUMAN AP-3 complex subunit delta-1 OS=Homo sapiens OX=9606 GN=AP3D1 PE=1 SV=1;tr|A0A2R8Y611|A0A2R8Y611_HUMAN AP-3 complex subunit delta (Fragment) OS=Homo sapiens OX=9606 GN=AP3D1 PE=1 SV=1	Homo sapiens	2	5	5	7.8	130.16	1153	0	18.118	7.8	8788100	8788100	0.0118991	5			301
Q14694;H3BNA1;H3BNL0;Q68D90;H3BQC6;H3BVF1	Ubiquitin carboxyl-terminal hydrolase 10	USP10	sp|Q14694|UBP10_HUMAN Ubiquitin carboxyl-terminal hydrolase 10 OS=Homo sapiens OX=9606 GN=USP10 PE=1 SV=2;tr|H3BNA1|H3BNA1_HUMAN Ubiquitinyl hydrolase 1 (Fragment) OS=Homo sapiens OX=9606 GN=USP10 PE=1 SV=1	Homo sapiens	6	3	3	9.5	87.133	798	0	10.157	9.5	8742800	8742800	0.0118378	6			539
U3KQT1;P10768;H7BZT7;X6RA14	S-formylglutathione hydrolase	ESD	tr|U3KQT1|U3KQT1_HUMAN S-formylglutathione hydrolase OS=Homo sapiens OX=9606 GN=ESD PE=1 SV=2;sp|P10768|ESTD_HUMAN S-formylglutathione hydrolase OS=Homo sapiens OX=9606 GN=ESD PE=1 SV=2;tr|H7BZT7|H7BZT7_HUMAN S-formylglutathione hydrolase (Fragment) OS=Hom	Homo sapiens	4	3	3	21.4	28.995	262	0	22.223	21.4	8618300	8618300	0.0116692	5			366
F8WE65;C9J5S7;P62937;E5RIZ5	Peptidyl-prolyl cis-trans isomerase;Peptidyl-prolyl cis-trans isomerase A;Peptidyl-prolyl cis-trans isomerase A, N-terminally processed	PPIA	tr|F8WE65|F8WE65_HUMAN Peptidyl-prolyl cis-trans isomerase OS=Homo sapiens OX=9606 GN=PPIA PE=1 SV=1;tr|C9J5S7|C9J5S7_HUMAN Peptidyl-prolyl cis-trans isomerase OS=Homo sapiens OX=9606 GN=PPIA PE=1 SV=1;sp|P62937|PPIA_HUMAN Peptidyl-prolyl cis-trans isomera	Homo sapiens	4	3	3	45	13.022	120	0	24.863	45	8590800	8590800	0.011632	6			129
E7EQR6;P17987;F5H282;E7ERF2	T-complex protein 1 subunit alpha	TCP1	tr|E7EQR6|E7EQR6_HUMAN T-complex protein 1 subunit alpha OS=Homo sapiens OX=9606 GN=TCP1 PE=1 SV=1;sp|P17987|TCPA_HUMAN T-complex protein 1 subunit alpha OS=Homo sapiens OX=9606 GN=TCP1 PE=1 SV=1;tr|F5H282|F5H282_HUMAN T-complex protein 1 subunit alpha OS=	Homo sapiens	4	4	4	10	43.885	401	0	21.463	10	8523100	8523100	0.0115403	8			164
A0A2R8Y765;J3QKS7;A0A2R8Y7U4;A0A2U3TZQ7;A0A2R8Y7I9;A0A2R8Y4T4;A0A2R8YES3;A0A2R8Y855;B4DGM3;Q969G3;J3QR61;A0A2R8YFC8;A0A2R8YEB8;J3KT85;A0A2R8YD78;J3QKX6	SWI/SNF-related matrix-associated actin-dependent regulator of chromatin subfamily E member 1	SMARCE1	tr|A0A2R8Y765|A0A2R8Y765_HUMAN SWI/SNF-related matrix-associated actin-dependent regulator of chromatin subfamily E member 1 OS=Homo sapiens OX=9606 GN=SMARCE1 PE=1 SV=1;tr|J3QKS7|J3QKS7_HUMAN SWI/SNF-related matrix-associated actin-dependent regulator of	Homo sapiens	16	3	3	13	32.319	277	0	26.174	13	8512800	8512800	0.0115264	3			68
A0A6Q8PHB5;A0A6Q8PHP0;P49902;Q5JUV6;Q5JUV4	Cytosolic purine 5-nucleotidase	NT5C2	tr|A0A6Q8PHB5|A0A6Q8PHB5_HUMAN Cytosolic purine 5-nucleotidase OS=Homo sapiens OX=9606 GN=NT5C2 PE=1 SV=1;tr|A0A6Q8PHP0|A0A6Q8PHP0_HUMAN Cytosolic purine 5-nucleotidase OS=Homo sapiens OX=9606 GN=NT5C2 PE=1 SV=1;sp|P49902|5NTC_HUMAN Cytosolic purine 5-n	Homo sapiens	5	3	3	13.8	50.147	436	0	10.614	13.8	8460100	8460100	0.011455	5			94
Q9Y285;K7EK06;K7ER16;K7ER00	Phenylalanine--tRNA ligase alpha subunit	FARSA	sp|Q9Y285|SYFA_HUMAN Phenylalanine--tRNA ligase alpha subunit OS=Homo sapiens OX=9606 GN=FARSA PE=1 SV=3;tr|K7EK06|K7EK06_HUMAN Phenylalanine--tRNA ligase alpha subunit (Fragment) OS=Homo sapiens OX=9606 GN=FARSA PE=1 SV=8;tr|K7ER16|K7ER16_HUMAN Phenylalan	Homo sapiens	4	3	3	8.1	57.563	508	0	33.937	8.1	8456500	8456500	0.0114502	4			654
P61081	NEDD8-conjugating enzyme Ubc12	UBE2M	sp|P61081|UBC12_HUMAN NEDD8-conjugating enzyme Ubc12 OS=Homo sapiens OX=9606 GN=UBE2M PE=1 SV=1	Homo sapiens	1	3	3	21.3	20.9	183	0	18.812	21.3	8431800	8431800	0.0114167	5			470
Q7KZF4;H7C597	Staphylococcal nuclease domain-containing protein 1	SND1	sp|Q7KZF4|SND1_HUMAN Staphylococcal nuclease domain-containing protein 1 OS=Homo sapiens OX=9606 GN=SND1 PE=1 SV=1	Homo sapiens	2	4	4	6.2	102	910	0	18.732	6.2	8362900	8362900	0.0113234	6			579
F8VZX2;Q15366;F8W0G4;F8VXH9;H3BRU6;F8W1G6;J3QT27;E9PFP8;P57721;H3BSP4;F8VTZ0;H3BND9;F8VRH0	Poly(rC)-binding protein 2	PCBP2	tr|F8VZX2|F8VZX2_HUMAN Poly(rC)-binding protein 2 OS=Homo sapiens OX=9606 GN=PCBP2 PE=1 SV=1;sp|Q15366|PCBP2_HUMAN Poly(rC)-binding protein 2 OS=Homo sapiens OX=9606 GN=PCBP2 PE=1 SV=1;tr|F8W0G4|F8W0G4_HUMAN Poly(rC)-binding protein 2 (Fragment) OS=Homo sa	Homo sapiens	13	5	3	26.8	33.8	321	0	5.3339	26.8	8349700	8349700	0.0113056	1			208
P36507;A0A1B0GUL7;Q02750	Dual specificity mitogen-activated protein kinase kinase 2	MAP2K2	sp|P36507|MP2K2_HUMAN Dual specificity mitogen-activated protein kinase kinase 2 OS=Homo sapiens OX=9606 GN=MAP2K2 PE=1 SV=1	Homo sapiens	3	3	3	14.2	44.424	400	0	4.2009	14.2	8309900	8309900	0.0112517	3			426
U3KQF4;K7EIY6;Q9BV68	E3 ubiquitin-protein ligase RNF126	RNF126	tr|U3KQF4|U3KQF4_HUMAN RING-type E3 ubiquitin transferase OS=Homo sapiens OX=9606 GN=RNF126 PE=1 SV=1;tr|K7EIY6|K7EIY6_HUMAN RING-type E3 ubiquitin transferase (Fragment) OS=Homo sapiens OX=9606 GN=RNF126 PE=1 SV=7;sp|Q9BV68|RN126_HUMAN E3 ubiquitin-protei	Homo sapiens	3	2	2	29.7	8.202	74	0	14.762	29.7	8303100	8303100	0.0112425	3			257
Q9BZE9;J3KRF7;J3KRY8;J3QL04;J3QR12	Tether containing UBX domain for GLUT4	ASPSCR1	sp|Q9BZE9|ASPC1_HUMAN Tether containing UBX domain for GLUT4 OS=Homo sapiens OX=9606 GN=ASPSCR1 PE=1 SV=1;tr|J3KRF7|J3KRF7_HUMAN Tether-containing UBX domain for GLUT4 (Fragment) OS=Homo sapiens OX=9606 GN=ASPSCR1 PE=1 SV=8;tr|J3KRY8|J3KRY8_HUMAN Tether-co	Homo sapiens	5	3	3	11	60.182	553	0	19.22	11	8300100	8300100	0.0112384	4			623
P07814;V9GYZ6	Bifunctional glutamate/proline--tRNA ligase;Glutamate--tRNA ligase;Proline--tRNA ligase	EPRS	sp|P07814|SYEP_HUMAN Bifunctional glutamate/proline--tRNA ligase OS=Homo sapiens OX=9606 GN=EPRS1 PE=1 SV=5;tr|V9GYZ6|V9GYZ6_HUMAN Glutamyl-tRNA synthetase (Fragment) OS=Homo sapiens OX=9606 GN=EPRS1 PE=1 SV=1	Homo sapiens	2	4	4	4.7	170.59	1512	0	13.261	4.7	8282300	8282300	0.0112143	5			354
P17655	Calpain-2 catalytic subunit	CAPN2	sp|P17655|CAN2_HUMAN Calpain-2 catalytic subunit OS=Homo sapiens OX=9606 GN=CAPN2 PE=1 SV=6	Homo sapiens	1	4	4	11.7	79.994	700	0	15.49	11.7	8129100	8129100	0.0110069	6			389
P10809;C9JL25;E7EXB4;E7ESH4	60 kDa heat shock protein, mitochondrial	HSPD1	sp|P10809|CH60_HUMAN 60 kDa heat shock protein, mitochondrial OS=Homo sapiens OX=9606 GN=HSPD1 PE=1 SV=2	Homo sapiens	4	3	3	8.9	61.054	573	0	8.8217	8.9	8065700	8065700	0.010921	4			367
P42704;C9JCA9;B8ZZ38;A0A0C4DG06;H7C3W8	Leucine-rich PPR motif-containing protein, mitochondrial	LRPPRC	sp|P42704|LPPRC_HUMAN Leucine-rich PPR motif-containing protein, mitochondrial OS=Homo sapiens OX=9606 GN=LRPPRC PE=1 SV=3;tr|C9JCA9|C9JCA9_HUMAN Leucine-rich PPR motif-containing protein, mitochondrial (Fragment) OS=Homo sapiens OX=9606 GN=LRPPRC PE=1 SV=	Homo sapiens	5	6	6	6.3	157.9	1394	0	24.996	6.3	7987500	7987500	0.0108151	9			438
P25685;M0R080	DnaJ homolog subfamily B member 1	DNAJB1	sp|P25685|DNJB1_HUMAN DnaJ homolog subfamily B member 1 OS=Homo sapiens OX=9606 GN=DNAJB1 PE=1 SV=4;tr|M0R080|M0R080_HUMAN DnaJ homolog subfamily B member 1 (Fragment) OS=Homo sapiens OX=9606 GN=DNAJB1 PE=1 SV=1	Homo sapiens	2	2	2	8.2	38.044	340	0	16.744	8.2	7928000	7928000	0.0107346	3			406
P51570;K7ERJ9;K7EII7	Galactokinase	GALK1	sp|P51570|GALK1_HUMAN Galactokinase OS=Homo sapiens OX=9606 GN=GALK1 PE=1 SV=1;tr|K7ERJ9|K7ERJ9_HUMAN Galactokinase OS=Homo sapiens OX=9606 GN=GALK1 PE=1 SV=1	Homo sapiens	3	4	4	9.9	42.272	392	0	18.504	9.9	7913400	7913400	0.0107148	6			452
A0A494C0X0;Q99426;K7EP07;K7EK42	Tubulin-folding cofactor B	TBCB	tr|A0A494C0X0|A0A494C0X0_HUMAN Tubulin-folding cofactor B OS=Homo sapiens OX=9606 GN=TBCB PE=1 SV=1;sp|Q99426|TBCB_HUMAN Tubulin-folding cofactor B OS=Homo sapiens OX=9606 GN=TBCB PE=1 SV=2;tr|K7EP07|K7EP07_HUMAN Tubulin-folding cofactor B (Fragment) OS=Ho	Homo sapiens	4	3	3	20.2	31.162	282	0	4.8171	20.2	7753700	7753700	0.0104986	2			85
P51991	Heterogeneous nuclear ribonucleoprotein A3	HNRNPA3	sp|P51991|ROA3_HUMAN Heterogeneous nuclear ribonucleoprotein A3 OS=Homo sapiens OX=9606 GN=HNRNPA3 PE=1 SV=2	Homo sapiens	1	3	3	7.7	39.594	378	0	11.661	7.7	7745000	7745000	0.0104868	6			454
P10599	Thioredoxin	TXN	sp|P10599|THIO_HUMAN Thioredoxin OS=Homo sapiens OX=9606 GN=TXN PE=1 SV=3	Homo sapiens	1	3	3	46.7	11.737	105	0	5.9095	46.7	7739300	7739300	0.0104791	4			365
A0A087X2I1;P62333;H0YJS8;H0YJC0	26S protease regulatory subunit 10B	PSMC6	tr|A0A087X2I1|A0A087X2I1_HUMAN 26S proteasome regulatory subunit 10B OS=Homo sapiens OX=9606 GN=PSMC6 PE=1 SV=1;sp|P62333|PRS10_HUMAN 26S proteasome regulatory subunit 10B OS=Homo sapiens OX=9606 GN=PSMC6 PE=1 SV=1;tr|H0YJS8|H0YJS8_HUMAN 26S proteasome reg	Homo sapiens	4	3	3	11.2	45.796	403	0	5.7548	11.2	7636400	7636400	0.0103397	4			33
Q93008;O00507	Probable ubiquitin carboxyl-terminal hydrolase FAF-X;Probable ubiquitin carboxyl-terminal hydrolase FAF-Y	USP9X;USP9Y	sp|Q93008|USP9X_HUMAN Probable ubiquitin carboxyl-terminal hydrolase FAF-X OS=Homo sapiens OX=9606 GN=USP9X PE=1 SV=4;sp|O00507|USP9Y_HUMAN Probable ubiquitin carboxyl-terminal hydrolase FAF-Y OS=Homo sapiens OX=9606 GN=USP9Y PE=2 SV=2	Homo sapiens	2	5	5	3.3	290.46	2554	0	40.353	3.3	7632200	7632200	0.0103341	8			603
Q96S55	ATPase WRNIP1	WRNIP1	sp|Q96S55|WRIP1_HUMAN ATPase WRNIP1 OS=Homo sapiens OX=9606 GN=WRNIP1 PE=1 SV=2	Homo sapiens	1	2	2	8	72.132	665	0	4.8313	8	7502900	7502900	0.010159	3			611
A0A6I8PRU9;A0A6I8PTV8;A0A6I8PIP7;A0A6I8PLB8;A0A6I8PL42;B4DER1;A0A6I8PIT3;A0A6I8PIV1;Q9P2J5;A0A6I8PLB3;A0A6I8PS05;A0A6I8PRS0	Leucine--tRNA ligase, cytoplasmic	LARS	tr|A0A6I8PRU9|A0A6I8PRU9_HUMAN Leucyl-tRNA synthetase OS=Homo sapiens OX=9606 GN=LARS1 PE=1 SV=1;tr|A0A6I8PTV8|A0A6I8PTV8_HUMAN Leucyl-tRNA synthetase OS=Homo sapiens OX=9606 GN=LARS1 PE=1 SV=1;tr|A0A6I8PIP7|A0A6I8PIP7_HUMAN Leucyl-tRNA synthetase OS=Homo	Homo sapiens	12	2	2	4.1	61.756	543	0.0016103	1.8116	4.1	7484100	7484100	0.0101335	2			90
Q12931	Heat shock protein 75 kDa, mitochondrial	TRAP1	sp|Q12931|TRAP1_HUMAN Heat shock protein 75 kDa, mitochondrial OS=Homo sapiens OX=9606 GN=TRAP1 PE=1 SV=3	Homo sapiens	1	1	1	1.7	80.109	704	0.001642	1.9206	1.7	7450600	7450600	0.0100882	1			517
P36578;H3BTP7;H3BU31;H3BM89	60S ribosomal protein L4	RPL4	sp|P36578|RL4_HUMAN 60S ribosomal protein L4 OS=Homo sapiens OX=9606 GN=RPL4 PE=1 SV=5;tr|H3BTP7|H3BTP7_HUMAN 60S ribosomal protein L4 (Fragment) OS=Homo sapiens OX=9606 GN=RPL4 PE=1 SV=1;tr|H3BU31|H3BU31_HUMAN 60S ribosomal protein L4 (Fragment) OS=Homo s	Homo sapiens	4	3	3	8	47.697	427	0	82.488	8	7364700	7364700	0.00997186	5			427
H0YDW1;H0YEN2;E9PQP7;H7BXH2;E9PKF6;Q5H9R7	Serine/threonine-protein phosphatase 6 regulatory subunit 3	PPP6R3	tr|H0YDW1|H0YDW1_HUMAN Serine/threonine-protein phosphatase 6 regulatory subunit 3 (Fragment) OS=Homo sapiens OX=9606 GN=PPP6R3 PE=1 SV=1;tr|H0YEN2|H0YEN2_HUMAN Serine/threonine-protein phosphatase 6 regulatory subunit 3 (Fragment) OS=Homo sapiens OX=9606	Homo sapiens	6	1	1	20.5	12.521	112	0.0017422	2.3737	20.5	7261800	7261800	0.00983253	2			182
C9JZP1;C9J470;E9PHA2;Q15003	Condensin complex subunit 2	NCAPH	tr|C9JZP1|C9JZP1_HUMAN Condensin complex subunit 2 (Fragment) OS=Homo sapiens OX=9606 GN=NCAPH PE=1 SV=1;tr|C9J470|C9J470_HUMAN Condensin complex subunit 2 (Fragment) OS=Homo sapiens OX=9606 GN=NCAPH PE=1 SV=8;tr|E9PHA2|E9PHA2_HUMAN Condensin complex subun	Homo sapiens	4	1	1	10.2	23.957	216	0	9.7768	10.2	7212200	7212200	0.00976537	2			126
A0A0A0MRN0		PRPF38B	tr|A0A0A0MRN0|A0A0A0MRN0_HUMAN Pre-mRNA-splicing factor 38B OS=Homo sapiens OX=9606 GN=PRPF38B PE=1 SV=1	Homo sapiens	1	1	1	5.1	52.487	435	0.0015949	1.7671	5.1	7160800	7160800	0.00969577	1			36
P55010;H0YLZ1;H0YN40;H0YK29;H0YK11;H0YMJ8;H0YM54	Eukaryotic translation initiation factor 5	EIF5	sp|P55010|IF5_HUMAN Eukaryotic translation initiation factor 5 OS=Homo sapiens OX=9606 GN=EIF5 PE=1 SV=2;tr|H0YLZ1|H0YLZ1_HUMAN Eukaryotic translation initiation factor 5 (Fragment) OS=Homo sapiens OX=9606 GN=EIF5 PE=1 SV=1;tr|H0YN40|H0YN40_HUMAN Eukaryoti	Homo sapiens	7	3	3	8.6	49.222	431	0	4.5424	8.6	7155600	7155600	0.00968873	4			460
P31689	DnaJ homolog subfamily A member 1	DNAJA1	sp|P31689|DNJA1_HUMAN DnaJ homolog subfamily A member 1 OS=Homo sapiens OX=9606 GN=DNAJA1 PE=1 SV=2	Homo sapiens	1	3	3	10.6	44.868	397	0	28.483	10.6	7147700	7147700	0.00967804	3			418
G3V1B8;H0YEB6;O60232	Sjoegren syndrome/scleroderma autoantigen 1	SSSCA1	tr|G3V1B8|G3V1B8_HUMAN Protein ZNRD2 OS=Homo sapiens OX=9606 GN=ZNRD2 PE=1 SV=1;tr|H0YEB6|H0YEB6_HUMAN Protein ZNRD2 (Fragment) OS=Homo sapiens OX=9606 GN=ZNRD2 PE=1 SV=1;sp|O60232|ZNRD2_HUMAN Protein ZNRD2 OS=Homo sapiens OX=9606 GN=ZNRD2 PE=1 SV=1	Homo sapiens	3	1	1	22.2	17.176	162	0.0031646	1.7508	22.2	7139800	7139800	0.00966734	1			214
E5RGQ3;Q9H446;E5RGS5	RWD domain-containing protein 1	RWDD1	tr|E5RGQ3|E5RGQ3_HUMAN RWD domain-containing protein 1 (Fragment) OS=Homo sapiens OX=9606 GN=RWDD1 PE=1 SV=1;sp|Q9H446|RWDD1_HUMAN RWD domain-containing protein 1 OS=Homo sapiens OX=9606 GN=RWDD1 PE=1 SV=1	Homo sapiens	3	3	3	40.3	8.5618	72	0	21.384	40.3	7117700	7117700	0.00963742	5			155
Q14112;H0YJV3;A0A087WZP6	Nidogen-2	NID2	sp|Q14112|NID2_HUMAN Nidogen-2 OS=Homo sapiens OX=9606 GN=NID2 PE=1 SV=3;tr|H0YJV3|H0YJV3_HUMAN Nidogen-2 (Fragment) OS=Homo sapiens OX=9606 GN=NID2 PE=1 SV=1;tr|A0A087WZP6|A0A087WZP6_HUMAN Nidogen-2 OS=Homo sapiens OX=9606 GN=NID2 PE=1 SV=1	Homo sapiens	3	4	4	4.9	151.25	1375	0	14.749	4.9	7040800	7040800	0.00953329	5			530
P50570;K7EMQ3;A0A1B0GUX5;E5RHK8;A0A0D9SFB1;A0A0U1RQP1;A0A0D9SFE4;Q05193;Q9UQ16	Dynamin-2	DNM2	sp|P50570|DYN2_HUMAN Dynamin-2 OS=Homo sapiens OX=9606 GN=DNM2 PE=1 SV=2;tr|K7EMQ3|K7EMQ3_HUMAN Dynamin-2 (Fragment) OS=Homo sapiens OX=9606 GN=DNM2 PE=1 SV=2	Homo sapiens	9	3	3	4.4	98.063	870	0	16.203	4.4	6927400	6927400	0.00937975	3			449
H7C106;F8W914;Q9NQC3	Reticulon;Reticulon-4	RTN4	tr|H7C106|H7C106_HUMAN Reticulon (Fragment) OS=Homo sapiens OX=9606 GN=RTN4 PE=1 SV=1;tr|F8W914|F8W914_HUMAN Reticulon OS=Homo sapiens OX=9606 GN=RTN4 PE=1 SV=1;sp|Q9NQC3|RTN4_HUMAN Reticulon-4 OS=Homo sapiens OX=9606 GN=RTN4 PE=1 SV=2	Homo sapiens	3	2	2	8.4	22.694	203	0	4.0642	8.4	6871200	6871200	0.00930365	2			211
Q5T1M5	FK506-binding protein 15	FKBP15	sp|Q5T1M5|FKB15_HUMAN FK506-binding protein 15 OS=Homo sapiens OX=9606 GN=FKBP15 PE=1 SV=2	Homo sapiens	1	3	3	3.3	133.63	1219	0	3.6261	3.3	6811300	6811300	0.00922255	3			568
E7ESY4;Q13330;H0Y4T7;H0YIT0;E9PF88;F8W9Y9;E9PCS8;E7EQY4;E7EV10;Q9BTC8	Metastasis-associated protein MTA1	MTA1	tr|E7ESY4|E7ESY4_HUMAN Metastasis-associated protein MTA1 OS=Homo sapiens OX=9606 GN=MTA1 PE=1 SV=1;sp|Q13330|MTA1_HUMAN Metastasis-associated protein MTA1 OS=Homo sapiens OX=9606 GN=MTA1 PE=1 SV=2;tr|H0Y4T7|H0Y4T7_HUMAN Metastasis-associated protein MTA1	Homo sapiens	10	3	3	7.7	79.372	703	0	5.0166	7.7	6777700	6777700	0.00917705	3			166
H3BN59;F6QDS0;Q9UMR2;H3BTB3;H3BMQ5;I3L0H8;H3BQK0;Q9NUU7;H3BTX1	ATP-dependent RNA helicase DDX19B;ATP-dependent RNA helicase DDX19A	DDX19A;DDX19B	tr|H3BN59|H3BN59_HUMAN RNA helicase (Fragment) OS=Homo sapiens OX=9606 PE=1 SV=1;tr|F6QDS0|F6QDS0_HUMAN RNA helicase OS=Homo sapiens OX=9606 GN=hCG_2043426 PE=1 SV=1;sp|Q9UMR2|DD19B_HUMAN ATP-dependent RNA helicase DDX19B OS=Homo sapiens OX=9606 GN=DDX19B	Homo sapiens	9	3	3	19.2	28.982	261	0	146.28	19.2	6742200	6742200	0.00912899	4			203
E5RHH1;J3KSS0;J3QRI7;J3QQQ9;J3QQV1;E5RIT6;Q9UNX3;P61254	60S ribosomal protein L26-like 1;60S ribosomal protein L26	RPL26L1;RPL26	tr|E5RHH1|E5RHH1_HUMAN 60S ribosomal protein L26-like 1 (Fragment) OS=Homo sapiens OX=9606 GN=RPL26L1 PE=1 SV=8;tr|J3KSS0|J3KSS0_HUMAN 60S ribosomal protein L26 OS=Homo sapiens OX=9606 GN=RPL26 PE=3 SV=1;tr|J3QRI7|J3QRI7_HUMAN 60S ribosomal protein L26 (Fr	Homo sapiens	8	1	1	28.9	4.5282	38	0	7.3222	28.9	6734400	6734400	0.00911843	3			157
P42677	40S ribosomal protein S27	RPS27	sp|P42677|RS27_HUMAN 40S ribosomal protein S27 OS=Homo sapiens OX=9606 GN=RPS27 PE=1 SV=3	Homo sapiens	1	1	1	13.1	9.461	84	0	4.4539	13.1	6717300	6717300	0.00909527	1			437
O14929	Histone acetyltransferase type B catalytic subunit	HAT1	sp|O14929|HAT1_HUMAN Histone acetyltransferase type B catalytic subunit OS=Homo sapiens OX=9606 GN=HAT1 PE=1 SV=1	Homo sapiens	1	3	3	9.3	49.512	419	0	40.417	9.3	6691800	6691800	0.00906074	4			305
Q5T7N0;A0A2R8Y6J3;P46777;A0A2R8Y4A2	60S ribosomal protein L5	RPL5	tr|Q5T7N0|Q5T7N0_HUMAN 60S ribosomal protein L5 (Fragment) OS=Homo sapiens OX=9606 GN=RPL5 PE=1 SV=2;tr|A0A2R8Y6J3|A0A2R8Y6J3_HUMAN 60S ribosomal protein L5 (Fragment) OS=Homo sapiens OX=9606 GN=RPL5 PE=1 SV=1;sp|P46777|RL5_HUMAN 60S ribosomal protein L5 O	Homo sapiens	4	3	3	33.8	14.114	130	0	19.02	33.8	6680400	6680400	0.00904531	5			73
E7EQU2;E7ESD3;E7EMU4;E7EV09;E7EQL5;Q13409;E9PGG1;E7EU01;E7EUM4;E7ERR6;E7ERH4;E7ET01;E7ETL8	Cytoplasmic dynein 1 intermediate chain 2	DYNC1I2	tr|E7EQU2|E7EQU2_HUMAN Cytoplasmic dynein 1 intermediate chain 2 (Fragment) OS=Homo sapiens OX=9606 GN=DYNC1I2 PE=1 SV=1;tr|E7ESD3|E7ESD3_HUMAN Cytoplasmic dynein 1 intermediate chain 2 (Fragment) OS=Homo sapiens OX=9606 GN=DYNC1I2 PE=1 SV=1;tr|E7EMU4|E7EM	Homo sapiens	13	2	2	19.5	20.756	185	0	11.389	19.5	6654000	6654000	0.00900956	5			161
G3V295;G3V5Z7;P60900;G3V3U4;G3V3I1;G3V4S5;G3V2S7	Proteasome subunit alpha type;Proteasome subunit alpha type-6	PSMA6	tr|G3V295|G3V295_HUMAN Proteasome subunit alpha type OS=Homo sapiens OX=9606 GN=PSMA6 PE=1 SV=1;tr|G3V5Z7|G3V5Z7_HUMAN Proteasome subunit alpha type OS=Homo sapiens OX=9606 GN=PSMA6 PE=1 SV=1;sp|P60900|PSA6_HUMAN Proteasome subunit alpha type-6 OS=Homo sap	Homo sapiens	7	3	3	16.7	22.842	203	0	5.5912	16.7	6608300	6608300	0.00894769	2			216
M0R3D6;M0R1A7;M0R117;Q02543;M0R0P7	60S ribosomal protein L18a	RPL18A	tr|M0R3D6|M0R3D6_HUMAN 60S ribosomal protein L18a (Fragment) OS=Homo sapiens OX=9606 GN=RPL18A PE=1 SV=1;tr|M0R1A7|M0R1A7_HUMAN 60S ribosomal protein L18a OS=Homo sapiens OX=9606 GN=RPL18A PE=1 SV=1;tr|M0R117|M0R117_HUMAN 60S ribosomal protein L18a OS=Homo	Homo sapiens	5	3	3	27.7	16.714	141	0	26.308	27.7	6555500	6555500	0.00887619	4			289
G3V459;Q8TD19	Serine/threonine-protein kinase Nek9	NEK9	tr|G3V459|G3V459_HUMAN Serine/threonine-protein kinase Nek9 OS=Homo sapiens OX=9606 GN=NEK9 PE=1 SV=1;sp|Q8TD19|NEK9_HUMAN Serine/threonine-protein kinase Nek9 OS=Homo sapiens OX=9606 GN=NEK9 PE=1 SV=2	Homo sapiens	2	1	1	28.8	11.491	104	0	24.944	28.8	6554700	6554700	0.00887511	2			218
O43390;A0A6Q8PH35;B4DT28;A0A6Q8PHG0;A0A6Q8PEX7;A0A6Q8PH31;B7Z645;O60506;A0A286YEZ8;F6UXX1	Heterogeneous nuclear ribonucleoprotein R;Heterogeneous nuclear ribonucleoprotein Q	HNRNPR;SYNCRIP	sp|O43390|HNRPR_HUMAN Heterogeneous nuclear ribonucleoprotein R OS=Homo sapiens OX=9606 GN=HNRNPR PE=1 SV=1;tr|A0A6Q8PH35|A0A6Q8PH35_HUMAN Heterogeneous nuclear ribonucleoprotein R OS=Homo sapiens OX=9606 GN=HNRNPR PE=1 SV=1;tr|B4DT28|B4DT28_HUMAN Heteroge	Homo sapiens	10	4	4	7.4	70.942	633	0	6.2224	7.4	6522800	6522800	0.00883192	4			309
C9JFE4;A0A096LP07;A0A096LPJ3;A8K070;Q13098;J3QLT0;J3KSA5;J3KRJ4	COP9 signalosome complex subunit 1	GPS1	tr|C9JFE4|C9JFE4_HUMAN COP9 signalosome complex subunit 1 OS=Homo sapiens OX=9606 GN=GPS1 PE=1 SV=2;tr|A0A096LP07|A0A096LP07_HUMAN COP9 signalosome complex subunit 1 OS=Homo sapiens OX=9606 GN=GPS1 PE=1 SV=1;tr|A0A096LPJ3|A0A096LPJ3_HUMAN COP9 signalosome	Homo sapiens	8	3	3	6.8	53.371	471	0	23.016	6.8	6510300	6510300	0.00881499	6			34
O95347;A0A0C4DGE5	Structural maintenance of chromosomes protein 2	SMC2	sp|O95347|SMC2_HUMAN Structural maintenance of chromosomes protein 2 OS=Homo sapiens OX=9606 GN=SMC2 PE=1 SV=2;tr|A0A0C4DGE5|A0A0C4DGE5_HUMAN Structural maintenance of chromosomes protein 2 OS=Homo sapiens OX=9606 GN=SMC2 PE=1 SV=1	Homo sapiens	2	4	4	5.1	135.65	1197	0	7.5761	5.1	6427700	6427700	0.00870315	4			336
P33176;A0A6Q8PGT2;A0A6Q8PGN1;A0A0G2JMZ6;J3KNA1;A0A6Q8PEZ8;A0A6Q8PGJ3;O60282;Q12840	Kinesin-1 heavy chain	KIF5B	sp|P33176|KINH_HUMAN Kinesin-1 heavy chain OS=Homo sapiens OX=9606 GN=KIF5B PE=1 SV=1	Homo sapiens	9	4	4	5	109.68	963	0	119.02	5	6367200	6367200	0.00862123	5			421
Q5JRA6;A0A0A0MRH6	Melanoma inhibitory activity protein 3	MIA3	sp|Q5JRA6|TGO1_HUMAN Transport and Golgi organization protein 1 homolog OS=Homo sapiens OX=9606 GN=MIA3 PE=1 SV=1;tr|A0A0A0MRH6|A0A0A0MRH6_HUMAN Transport and Golgi organization protein 1 homolog (Fragment) OS=Homo sapiens OX=9606 GN=MIA3 PE=1 SV=6	Homo sapiens	2	3	3	3.5	213.7	1907	0	10.822	3.5	6353700	6353700	0.00860295	5			566
Q13162;A6NG45	Peroxiredoxin-4	PRDX4	sp|Q13162|PRDX4_HUMAN Peroxiredoxin-4 OS=Homo sapiens OX=9606 GN=PRDX4 PE=1 SV=1;tr|A6NG45|A6NG45_HUMAN Peroxiredoxin-4 OS=Homo sapiens OX=9606 GN=PRDX4 PE=1 SV=1	Homo sapiens	2	3	2	12.2	30.54	271	0	16.226	12.2	6285600	6285600	0.00851075	3			521
H3BSA1;P19784;H3BV19	Casein kinase II subunit alpha	CSNK2A2	tr|H3BSA1|H3BSA1_HUMAN Casein kinase II subunit alpha (Fragment) OS=Homo sapiens OX=9606 GN=CSNK2A2 PE=1 SV=2;sp|P19784|CSK22_HUMAN Casein kinase II subunit alpha OS=Homo sapiens OX=9606 GN=CSNK2A2 PE=1 SV=1;tr|H3BV19|H3BV19_HUMAN Casein kinase II subuni	Homo sapiens	3	2	2	17	27.025	230	0	113.25	17	6225800	6225800	0.00842978	2			240
P67775;P62714;H0YBN9;E5RI56;H0YC23	Serine/threonine-protein phosphatase 2A catalytic subunit alpha isoform;Serine/threonine-protein phosphatase 2A catalytic subunit beta isoform	PPP2CA;PPP2CB	sp|P67775|PP2AA_HUMAN Serine/threonine-protein phosphatase 2A catalytic subunit alpha isoform OS=Homo sapiens OX=9606 GN=PPP2CA PE=1 SV=1;sp|P62714|PP2AB_HUMAN Serine/threonine-protein phosphatase 2A catalytic subunit beta isoform OS=Homo sapiens OX=9606 G	Homo sapiens	5	3	3	15.9	35.594	309	0	24.782	15.9	6134500	6134500	0.00830616	5			489
Q5TAQ9;V9GY54;Q5TAQ8	DDB1- and CUL4-associated factor 8	DCAF8	sp|Q5TAQ9|DCAF8_HUMAN DDB1- and CUL4-associated factor 8 OS=Homo sapiens OX=9606 GN=DCAF8 PE=1 SV=1;tr|V9GY54|V9GY54_HUMAN DDB1- and CUL4-associated factor 8 OS=Homo sapiens OX=9606 GN=DCAF8 PE=1 SV=1	Homo sapiens	3	3	3	7.4	66.851	597	0	7.184	7.4	6113500	6113500	0.00827772	4			571
O94776	Metastasis-associated protein MTA2	MTA2	sp|O94776|MTA2_HUMAN Metastasis-associated protein MTA2 OS=Homo sapiens OX=9606 GN=MTA2 PE=1 SV=1	Homo sapiens	1	2	2	3.3	75.022	668	0	2.72	3.3	5928000	5928000	0.00802655	2			332
E9PJ81;E9PRQ7;Q04323;E9PS08;A0A087WTZ5	UBX domain-containing protein 1	UBXN1	tr|E9PJ81|E9PJ81_HUMAN UBX domain-containing protein 1 (Fragment) OS=Homo sapiens OX=9606 GN=UBXN1 PE=1 SV=1;tr|E9PRQ7|E9PRQ7_HUMAN UBX domain-containing protein 1 OS=Homo sapiens OX=9606 GN=UBXN1 PE=1 SV=1;sp|Q04323|UBXN1_HUMAN UBX domain-containing prote	Homo sapiens	5	2	2	20.7	32.611	290	0	4.9208	20.7	5896400	5896400	0.00798377	3			179
O60749;D6RC15	Sorting nexin-2	SNX2	sp|O60749|SNX2_HUMAN Sorting nexin-2 OS=Homo sapiens OX=9606 GN=SNX2 PE=1 SV=2	Homo sapiens	2	3	3	7.3	58.47	519	0	6.2734	7.3	5870300	5870300	0.00794843	2			319
B4DIH5;P61201	COP9 signalosome complex subunit 2	COPS2	tr|B4DIH5|B4DIH5_HUMAN COP9 signalosome complex subunit 2 OS=Homo sapiens OX=9606 GN=COPS2 PE=1 SV=1;sp|P61201|CSN2_HUMAN COP9 signalosome complex subunit 2 OS=Homo sapiens OX=9606 GN=COPS2 PE=1 SV=1	Homo sapiens	2	2	2	12.1	44.228	379	0	29.694	12.1	5711600	5711600	0.00773355	6			114
H0YD13;H0YDW7;H0YCV9;H0Y5E4;P16070;E9PKC6;H0YDX6;H0YD17;H0Y2P0;Q86UZ1	CD44 antigen	CD44	tr|H0YD13|H0YD13_HUMAN CD44 antigen OS=Homo sapiens OX=9606 GN=CD44 PE=1 SV=2;tr|H0YDW7|H0YDW7_HUMAN CD44 antigen (Fragment) OS=Homo sapiens OX=9606 GN=CD44 PE=1 SV=2;tr|H0YCV9|H0YCV9_HUMAN CD44 antigen (Fragment) OS=Homo sapiens OX=9606 GN=CD44 PE=1 SV=2;	Homo sapiens	10	3	3	15	22.683	206	0	4.9904	15	5696500	5696500	0.0077131	3			225
Q86U42	Polyadenylate-binding protein 2	PABPN1	sp|Q86U42|PABP2_HUMAN Polyadenylate-binding protein 2 OS=Homo sapiens OX=9606 GN=PABPN1 PE=1 SV=3	Homo sapiens	1	1	1	7.2	32.749	306	0	4.6611	7.2	5672300	5672300	0.00768033	2			583
H3BNT7;H3BTM8;P51665	26S proteasome non-ATPase regulatory subunit 7	PSMD7	tr|H3BNT7|H3BNT7_HUMAN 26S proteasome non-ATPase regulatory subunit 7 OS=Homo sapiens OX=9606 GN=PSMD7 PE=1 SV=1;tr|H3BTM8|H3BTM8_HUMAN 26S proteasome non-ATPase regulatory subunit 7 OS=Homo sapiens OX=9606 GN=PSMD7 PE=1 SV=1;sp|P51665|PSMD7_HUMAN 26S prot	Homo sapiens	3	4	4	23.2	20.064	177	0	4.6127	23.2	5630100	5630100	0.0076232	4			236
B1AHD1;A0A3B3IUA2;P55769;A0A3B3IRU2	NHP2-like protein 1;NHP2-like protein 1, N-terminally processed	NHP2L1	tr|B1AHD1|B1AHD1_HUMAN Ribonucloprotein OS=Homo sapiens OX=9606 GN=SNU13 PE=1 SV=1;tr|A0A3B3IUA2|A0A3B3IUA2_HUMAN Ribonucloprotein OS=Homo sapiens OX=9606 GN=SNU13 PE=1 SV=1;sp|P55769|NH2L1_HUMAN NHP2-like protein 1 OS=Homo sapiens OX=9606 GN=SNU13 PE=1 SV	Homo sapiens	4	2	2	22.7	14.627	132	0	17.866	22.7	5516600	5516600	0.00746952	4			82
D6RC18;A8MVI5;Q9ULR0	Pre-mRNA-splicing factor ISY1 homolog	ISY1	tr|D6RC18|D6RC18_HUMAN Pre-mRNA-splicing factor ISY1 homolog OS=Homo sapiens OX=9606 GN=ISY1 PE=1 SV=1;tr|A8MVI5|A8MVI5_HUMAN Pre-mRNA-splicing factor ISY1 homolog OS=Homo sapiens OX=9606 GN=ISY1 PE=1 SV=1;sp|Q9ULR0|ISY1_HUMAN Pre-mRNA-splicing factor ISY1	Homo sapiens	3	2	2	21	14.311	124	0.0016835	2.0905	21	5471400	5471400	0.00740831	1			101
O00148;H0Y400;K7EQN7;K7ENP6;K7EL56;K7EIL8;K7EN69;F6SXL5;K7EPJ3	ATP-dependent RNA helicase DDX39A	DDX39A	sp|O00148|DX39A_HUMAN ATP-dependent RNA helicase DDX39A OS=Homo sapiens OX=9606 GN=DDX39A PE=1 SV=2	Homo sapiens	9	9	1	18.7	49.129	427	0	36.039	18.7	5459400	5459400	0.00739207	4			294
O00231;J3QRY4	26S proteasome non-ATPase regulatory subunit 11	PSMD11	sp|O00231|PSD11_HUMAN 26S proteasome non-ATPase regulatory subunit 11 OS=Homo sapiens OX=9606 GN=PSMD11 PE=1 SV=3;tr|J3QRY4|J3QRY4_HUMAN 26S proteasome non-ATPase regulatory subunit 11 (Fragment) OS=Homo sapiens OX=9606 GN=PSMD11 PE=1 SV=8	Homo sapiens	2	2	2	5.2	47.463	422	0	47.277	5.2	5405700	5405700	0.00731936	4			295
P55036;H0Y3Y9;Q5VWC4;A6PVX3	26S proteasome non-ATPase regulatory subunit 4	PSMD4	sp|P55036|PSMD4_HUMAN 26S proteasome non-ATPase regulatory subunit 4 OS=Homo sapiens OX=9606 GN=PSMD4 PE=1 SV=1;tr|H0Y3Y9|H0Y3Y9_HUMAN 26S proteasome non-ATPase regulatory subunit 4 (Fragment) OS=Homo sapiens OX=9606 GN=PSMD4 PE=1 SV=1;tr|Q5VWC4|Q5VWC4_HUM	Homo sapiens	4	3	3	13.5	40.736	377	0	6.2808	13.5	5375500	5375500	0.00727847	3			461
P48741;P17066	Putative heat shock 70 kDa protein 7;Heat shock 70 kDa protein 6	HSPA7;HSPA6	sp|P48741|HSP77_HUMAN Putative heat shock 70 kDa protein 7 OS=Homo sapiens OX=9606 GN=HSPA7 PE=5 SV=2;sp|P17066|HSP76_HUMAN Heat shock 70 kDa protein 6 OS=Homo sapiens OX=9606 GN=HSPA6 PE=1 SV=2	Homo sapiens	2	2	1	6.5	40.244	367	0	9.4268	6.5	5373700	5373700	0.00727603	2			388
P08559;Q5JPU3;Q5JPU2;Q5JPU0;Q5JPT9;Q5JPU1	Pyruvate dehydrogenase E1 component subunit alpha, somatic form, mitochondrial	PDHA1	sp|P08559|ODPA_HUMAN Pyruvate dehydrogenase E1 component subunit alpha, somatic form, mitochondrial OS=Homo sapiens OX=9606 GN=PDHA1 PE=1 SV=3;tr|Q5JPU3|Q5JPU3_HUMAN Pyruvate dehydrogenase E1 component subunit alpha, somatic form, mitochondrial OS=Homo sap	Homo sapiens	6	2	2	6.7	43.295	390	0	5.1753	6.7	5166200	5166200	0.00699507	3			358
Q5T5C7;P49591	Serine--tRNA ligase, cytoplasmic	SARS	tr|Q5T5C7|Q5T5C7_HUMAN Seryl-tRNA synthetase OS=Homo sapiens OX=9606 GN=SARS1 PE=1 SV=1;sp|P49591|SYSC_HUMAN Serine--tRNA ligase, cytoplasmic OS=Homo sapiens OX=9606 GN=SARS1 PE=1 SV=3	Homo sapiens	2	2	2	3.7	61.312	536	0	6.0516	3.7	5162500	5162500	0.00699006	4			447
Q5T7U0;Q5T7U4;Q5T7U1;Q9Y5Q8	General transcription factor 3C polypeptide 5	GTF3C5	tr|Q5T7U0|Q5T7U0_HUMAN General transcription factor 3C polypeptide 5 (Fragment) OS=Homo sapiens OX=9606 GN=GTF3C5 PE=1 SV=1;tr|Q5T7U4|Q5T7U4_HUMAN General transcription factor 3C polypeptide 5 (Fragment) OS=Homo sapiens OX=9606 GN=GTF3C5 PE=1 SV=1;tr|Q5T7U	Homo sapiens	4	2	2	15.2	26.267	224	0	16.131	15.2	5134200	5134200	0.00695174	4			570
Q15061	WD repeat-containing protein 43	WDR43	sp|Q15061|WDR43_HUMAN WD repeat-containing protein 43 OS=Homo sapiens OX=9606 GN=WDR43 PE=1 SV=3	Homo sapiens	1	1	1	3.8	74.89	677	0	2.69	3.8	5131400	5131400	0.00694795	3			544
F8VPF3;F8W1R7;J3KND3;G8JLA2;G3V1V0;F8W1I5;B7Z6Z4;P60660;P14649	Myosin light polypeptide 6;Myosin light chain 6B	MYL6;MYL6B	tr|F8VPF3|F8VPF3_HUMAN Myosin light polypeptide 6 (Fragment) OS=Homo sapiens OX=9606 GN=MYL6 PE=1 SV=1;tr|F8W1R7|F8W1R7_HUMAN Myosin light polypeptide 6 OS=Homo sapiens OX=9606 GN=MYL6 PE=1 SV=1;tr|J3KND3|J3KND3_HUMAN Myosin light polypeptide 6 OS=Homo sap	Homo sapiens	9	1	1	10	14.436	130	0	3.2443	10	5130200	5130200	0.00694633	1			120
Q8TDB4	Protein MGARP	MGARP	sp|Q8TDB4|HUMMR_HUMAN Protein MGARP OS=Homo sapiens OX=9606 GN=MGARP PE=1 SV=1	Homo sapiens	1	1	1	13.3	25.389	240	0	2.8514	13.3	5110100	5110100	0.00691911	2			591
A8MUA9;A8MU27;Q6EEV6;P61956;P55854	Small ubiquitin-related modifier 4;Small ubiquitin-related modifier 2;Small ubiquitin-related modifier 3	SUMO3;SUMO4;SUMO2	tr|A8MUA9|A8MUA9_HUMAN SMT3 suppressor of mif two 3 homolog 3 (Yeast), isoform CRA_d OS=Homo sapiens OX=9606 GN=SUMO3 PE=1 SV=1;tr|A8MU27|A8MU27_HUMAN Small ubiquitin-related modifier 3 OS=Homo sapiens OX=9606 GN=SUMO3 PE=1 SV=1;sp|Q6EEV6|SUMO4_HUMAN Small	Homo sapiens	5	1	1	8.9	15.317	135	0	2.7972	8.9	5103600	5103600	0.00691031	1			99
Q9BSD7;Q5TDF0	Cancer-related nucleoside-triphosphatase	NTPCR	sp|Q9BSD7|NTPCR_HUMAN Cancer-related nucleoside-triphosphatase OS=Homo sapiens OX=9606 GN=NTPCR PE=1 SV=1;tr|Q5TDF0|Q5TDF0_HUMAN Cancer-related nucleoside-triphosphatase OS=Homo sapiens OX=9606 GN=NTPCR PE=1 SV=1	Homo sapiens	2	4	4	28.4	20.713	190	0	13.925	28.4	5038100	5038100	0.00682162	5			620
P26373;H3BTH3;J3QSB4	60S ribosomal protein L13	RPL13	sp|P26373|RL13_HUMAN 60S ribosomal protein L13 OS=Homo sapiens OX=9606 GN=RPL13 PE=1 SV=4;tr|H3BTH3|H3BTH3_HUMAN 60S ribosomal protein L13 OS=Homo sapiens OX=9606 GN=RPL13 PE=1 SV=1;tr|J3QSB4|J3QSB4_HUMAN 60S ribosomal protein L13 (Fragment) OS=Homo sapien	Homo sapiens	3	4	4	15.2	24.261	211	0	4.4797	15.2	5029900	5029900	0.00681052	4			407
P05198	Eukaryotic translation initiation factor 2 subunit 1	EIF2S1	sp|P05198|IF2A_HUMAN Eukaryotic translation initiation factor 2 subunit 1 OS=Homo sapiens OX=9606 GN=EIF2S1 PE=1 SV=3	Homo sapiens	1	1	1	3.8	36.112	315	0	14.875	3.8	4982700	4982700	0.00674661	1			346
A0A6Q8PFX2;P54577	Tyrosine--tRNA ligase, cytoplasmic;Tyrosine--tRNA ligase, cytoplasmic, N-terminally processed	YARS	tr|A0A6Q8PFX2|A0A6Q8PFX2_HUMAN Tyrosine--tRNA ligase OS=Homo sapiens OX=9606 GN=YARS1 PE=1 SV=1;sp|P54577|SYYC_HUMAN Tyrosine--tRNA ligase, cytoplasmic OS=Homo sapiens OX=9606 GN=YARS1 PE=1 SV=4	Homo sapiens	2	3	3	9.8	53.592	479	0	17.849	9.8	4977000	4977000	0.00673889	5			92
E9PMJ3;E9PLZ3;E9PIM9;P13489;E9PMA9;E9PMN0;E9PIK5	Ribonuclease inhibitor	RNH1	tr|E9PMJ3|E9PMJ3_HUMAN Ribonuclease inhibitor (Fragment) OS=Homo sapiens OX=9606 GN=RNH1 PE=1 SV=1;tr|E9PLZ3|E9PLZ3_HUMAN Ribonuclease inhibitor (Fragment) OS=Homo sapiens OX=9606 GN=RNH1 PE=1 SV=1;tr|E9PIM9|E9PIM9_HUMAN Ribonuclease inhibitor (Fragment) O	Homo sapiens	7	2	2	13.8	20.475	189	0	11.704	13.8	4970800	4970800	0.0067305	2			178
P28070	Proteasome subunit beta type-4	PSMB4	sp|P28070|PSB4_HUMAN Proteasome subunit beta type-4 OS=Homo sapiens OX=9606 GN=PSMB4 PE=1 SV=4	Homo sapiens	1	2	2	10.6	29.204	264	0	5.4156	10.6	4951800	4951800	0.00670477	3			414
Q01658	Protein Dr1	DR1	sp|Q01658|NC2B_HUMAN Protein Dr1 OS=Homo sapiens OX=9606 GN=DR1 PE=1 SV=1	Homo sapiens	1	2	2	21	19.443	176	0	12.764	21	4937400	4937400	0.00668527	3			503
D6R9P3;D6RD18;D6RBZ0		HNRNPAB	tr|D6R9P3|D6R9P3_HUMAN Heterogeneous nuclear ribonucleoprotein A/B OS=Homo sapiens OX=9606 GN=HNRNPAB PE=1 SV=1;tr|D6RD18|D6RD18_HUMAN Heterogeneous nuclear ribonucleoprotein A/B OS=Homo sapiens OX=9606 GN=HNRNPAB PE=1 SV=1;tr|D6RBZ0|D6RBZ0_HUMAN Heterogen	Homo sapiens	3	1	1	5	30.302	280	0	27.652	5	4879200	4879200	0.00660647	3			147
A0A087X1I3;D6RFM5;P31040;A0A494C1T6;H0Y8X1	Succinate dehydrogenase [ubiquinone] flavoprotein subunit, mitochondrial	SDHA	tr|A0A087X1I3|A0A087X1I3_HUMAN Flavoprotein subunit of complex II OS=Homo sapiens OX=9606 GN=SDHA PE=1 SV=1;tr|D6RFM5|D6RFM5_HUMAN Succinate dehydrogenase [ubiquinone] flavoprotein subunit, mitochondrial OS=Homo sapiens OX=9606 GN=SDHA PE=1 SV=1;sp|P31040|	Homo sapiens	5	3	3	11.6	56.662	519	0	8.5373	11.6	4862300	4862300	0.00658359	6			29
P05141	ADP/ATP translocase 2;ADP/ATP translocase 2, N-terminally processed	SLC25A5	sp|P05141|ADT2_HUMAN ADP/ATP translocase 2 OS=Homo sapiens OX=9606 GN=SLC25A5 PE=1 SV=7	Homo sapiens	1	2	2	7.4	32.852	298	0	15.736	7.4	4857300	4857300	0.00657682	1			345
C9JLI6;H0YMV8;Q71UM5	40S ribosomal protein S27;40S ribosomal protein S27-like	RPS27L	tr|C9JLI6|C9JLI6_HUMAN 40S ribosomal protein S27 OS=Homo sapiens OX=9606 GN=RPS27L PE=1 SV=1;tr|H0YMV8|H0YMV8_HUMAN 40S ribosomal protein S27 OS=Homo sapiens OX=9606 GN=RPS27L PE=1 SV=1;sp|Q71UM5|RS27L_HUMAN 40S ribosomal protein S27-like OS=Homo sapiens O	Homo sapiens	3	1	1	11.3	10.886	97	0.0016129	1.8148	11.3	4852300	4852300	0.00657005	1			135
Q9BUR4;E9PMR3;E9PMG4	Telomerase Cajal body protein 1	WRAP53	sp|Q9BUR4|TCAB1_HUMAN Telomerase Cajal body protein 1 OS=Homo sapiens OX=9606 GN=WRAP53 PE=1 SV=1;tr|E9PMR3|E9PMR3_HUMAN Telomerase Cajal body protein 1 OS=Homo sapiens OX=9606 GN=WRAP53 PE=1 SV=1;tr|E9PMG4|E9PMG4_HUMAN Telomerase Cajal body protein 1 OS=H	Homo sapiens	3	3	3	10.2	59.309	548	0	28.211	10.2	4823700	4823700	0.00653132	5			621
H7BYX6;A0A087WTE4;A0A087WTF6;A0A087WX77;A0A087WWD4;A0A087WV75;P13591	Neural cell adhesion molecule 1	NCAM1	tr|H7BYX6|H7BYX6_HUMAN Neural cell adhesion molecule 1 OS=Homo sapiens OX=9606 GN=NCAM1 PE=1 SV=2;tr|A0A087WTE4|A0A087WTE4_HUMAN Neural cell adhesion molecule 1 OS=Homo sapiens OX=9606 GN=NCAM1 PE=1 SV=1;tr|A0A087WTF6|A0A087WTF6_HUMAN Neural cell adhesion	Homo sapiens	7	2	2	4	80.282	725	0	86.207	4	4811900	4811900	0.00651535	5			4
A0A087X0M4;A0A087WWF4;Q9BWU0	Kanadaptin	SLC4A1AP	tr|A0A087X0M4|A0A087X0M4_HUMAN Kanadaptin OS=Homo sapiens OX=9606 GN=SLC4A1AP PE=1 SV=1;tr|A0A087WWF4|A0A087WWF4_HUMAN Kanadaptin (Fragment) OS=Homo sapiens OX=9606 GN=SLC4A1AP PE=1 SV=1;sp|Q9BWU0|NADAP_HUMAN Kanadaptin OS=Homo sapiens OX=9606 GN=SLC4A1AP	Homo sapiens	3	2	2	6.2	82.89	742	0	4.1734	6.2	4810000	4810000	0.00651277	2			27
Q9UPN7	Serine/threonine-protein phosphatase 6 regulatory subunit 1	PPP6R1	sp|Q9UPN7|PP6R1_HUMAN Serine/threonine-protein phosphatase 6 regulatory subunit 1 OS=Homo sapiens OX=9606 GN=PPP6R1 PE=1 SV=5	Homo sapiens	1	1	1	4	96.723	881	0.0017153	2.2257	4	4801200	4801200	0.00650086	2			649
Q96QR8	Transcriptional activator protein Pur-beta	PURB	sp|Q96QR8|PURB_HUMAN Transcriptional activator protein Pur-beta OS=Homo sapiens OX=9606 GN=PURB PE=1 SV=3	Homo sapiens	1	2	2	20.2	33.24	312	0	4.3312	20.2	4797400	4797400	0.00649571	2			610
P62851	40S ribosomal protein S25	RPS25	sp|P62851|RS25_HUMAN 40S ribosomal protein S25 OS=Homo sapiens OX=9606 GN=RPS25 PE=1 SV=1	Homo sapiens	1	2	2	20	13.742	125	0	3.9802	20	4792100	4792100	0.00648854	4			482
P54886	Delta-1-pyrroline-5-carboxylate synthase;Glutamate 5-kinase;Gamma-glutamyl phosphate reductase	ALDH18A1	sp|P54886|P5CS_HUMAN Delta-1-pyrroline-5-carboxylate synthase OS=Homo sapiens OX=9606 GN=ALDH18A1 PE=1 SV=2	Homo sapiens	1	3	3	6.2	87.301	795	0	18.167	6.2	4778300	4778300	0.00646985	4			458
P29966	Myristoylated alanine-rich C-kinase substrate	MARCKS	sp|P29966|MARCS_HUMAN Myristoylated alanine-rich C-kinase substrate OS=Homo sapiens OX=9606 GN=MARCKS PE=1 SV=4	Homo sapiens	1	1	1	9.6	31.554	332	0	3.4242	9.6	4756600	4756600	0.00644047	2			416
B5MDF5;P62826;A0A087X0W0;B4DV51;F5H018;J3KQE5	GTP-binding nuclear protein Ran	RAN	tr|B5MDF5|B5MDF5_HUMAN GTP-binding nuclear protein Ran OS=Homo sapiens OX=9606 GN=RAN PE=1 SV=1;sp|P62826|RAN_HUMAN GTP-binding nuclear protein Ran OS=Homo sapiens OX=9606 GN=RAN PE=1 SV=3;tr|A0A087X0W0|A0A087X0W0_HUMAN GTP-binding nuclear protein Ran OS=H	Homo sapiens	6	2	2	10.7	26.224	233	0	7.7728	10.7	4710700	4710700	0.00637832	0			119
A0A0B4J1W3;Q9BXJ9	N-alpha-acetyltransferase 15, NatA auxiliary subunit	NAA15	tr|A0A0B4J1W3|A0A0B4J1W3_HUMAN N-alpha-acetyltransferase 15, NatA auxiliary subunit OS=Homo sapiens OX=9606 GN=NAA15 PE=1 SV=1;sp|Q9BXJ9|NAA15_HUMAN N-alpha-acetyltransferase 15, NatA auxiliary subunit OS=Homo sapiens OX=9606 GN=NAA15 PE=1 SV=1	Homo sapiens	2	2	2	2.8	101.2	865	0.001675	2.0561	2.8	4658900	4658900	0.00630818	2			40
Q15459;F8WB66	Splicing factor 3A subunit 1	SF3A1	sp|Q15459|SF3A1_HUMAN Splicing factor 3A subunit 1 OS=Homo sapiens OX=9606 GN=SF3A1 PE=1 SV=1;tr|F8WB66|F8WB66_HUMAN Splicing factor 3A subunit 1 OS=Homo sapiens OX=9606 GN=SF3A1 PE=1 SV=1	Homo sapiens	2	2	2	5.5	88.885	793	0	4.0183	5.5	4627300	4627300	0.0062654	3			552
Q14137;A0A075B729	Ribosome biogenesis protein BOP1	BOP1	sp|Q14137|BOP1_HUMAN Ribosome biogenesis protein BOP1 OS=Homo sapiens OX=9606 GN=BOP1 PE=1 SV=2;tr|A0A075B729|A0A075B729_HUMAN Ribosome biogenesis protein BOP1 (Fragment) OS=Homo sapiens OX=9606 GN=BOP1 PE=1 SV=1	Homo sapiens	2	2	2	4.4	83.629	746	0	3.3498	4.4	4614500	4614500	0.00624807	4			532
F8VUA6;G3V203;H0YHA7;J3QQ67;Q07020;F8VYV2;A0A075B7A0	60S ribosomal protein L18	RPL18	tr|F8VUA6|F8VUA6_HUMAN 60S ribosomal protein L18 (Fragment) OS=Homo sapiens OX=9606 GN=RPL18 PE=1 SV=1;tr|G3V203|G3V203_HUMAN 60S ribosomal protein L18 OS=Homo sapiens OX=9606 GN=RPL18 PE=1 SV=1;tr|H0YHA7|H0YHA7_HUMAN 60S ribosomal protein L18 (Fragment) O	Homo sapiens	7	2	2	20	14.529	130	0	15.989	20	4541600	4541600	0.00614936	2			206
K7EMV3;K7EP01;A0A590UJJ6;B4DEB1;K7EK07;Q5TEC6;K7ES00;Q6NXT2;Q71DI3;Q16695;P84243;P68431	Histone H3;Histone H3.3C;Histone H3.2;Histone H3.1t;Histone H3.3;Histone H3.1	H3F3B;H3F3A;HIST2H3PS2;H3F3C;HIST2H3A;HIST3H3;HIST1H3A	tr|K7EMV3|K7EMV3_HUMAN Histone H3 OS=Homo sapiens OX=9606 GN=H3-3B PE=1 SV=1;tr|K7EP01|K7EP01_HUMAN Histone H3.3 OS=Homo sapiens OX=9606 GN=H3-3B PE=1 SV=1;tr|A0A590UJJ6|A0A590UJJ6_HUMAN Histone H3 OS=Homo sapiens OX=9606 GN=H3-3A PE=1 SV=1;tr|B4DEB1|B4DEB	Homo sapiens	12	1	1	7.6	10.334	92	0.0076687	1.5522	7.6	4501100	4501100	0.00609452	1			88
E9PD53;Q9NTJ3;C9JR83	Structural maintenance of chromosomes protein;Structural maintenance of chromosomes protein 4	SMC4	tr|E9PD53|E9PD53_HUMAN Structural maintenance of chromosomes protein OS=Homo sapiens OX=9606 GN=SMC4 PE=1 SV=1;sp|Q9NTJ3|SMC4_HUMAN Structural maintenance of chromosomes protein 4 OS=Homo sapiens OX=9606 GN=SMC4 PE=1 SV=2	Homo sapiens	3	3	3	2.9	144.45	1263	0	32.821	2.9	4446300	4446300	0.00602032	5			175
X6RCK5;O75935	Dynactin subunit 3	DCTN3	tr|X6RCK5|X6RCK5_HUMAN Dynactin subunit 3 (Fragment) OS=Homo sapiens OX=9606 GN=DCTN3 PE=1 SV=1;sp|O75935|DCTN3_HUMAN Dynactin subunit 3 OS=Homo sapiens OX=9606 GN=DCTN3 PE=1 SV=1	Homo sapiens	2	1	1	13.2	17.299	151	0	23.12	13.2	4392500	4392500	0.00594748	3			331
E9PBS1;P22234	Multifunctional protein ADE2;Phosphoribosylaminoimidazole-succinocarboxamide synthase;Phosphoribosylaminoimidazole carboxylase	PAICS	tr|E9PBS1|E9PBS1_HUMAN AIR carboxylase (Fragment) OS=Homo sapiens OX=9606 GN=PAICS PE=1 SV=1;sp|P22234|PUR6_HUMAN Multifunctional protein ADE2 OS=Homo sapiens OX=9606 GN=PAICS PE=1 SV=3	Homo sapiens	2	1	1	2.7	45.651	413	0	6.6757	2.7	4378500	4378500	0.00592852	1			172
P12814;H9KV75;G3V2N5;G3V2W4;H7C5W8	Alpha-actinin-1	ACTN1	sp|P12814|ACTN1_HUMAN Alpha-actinin-1 OS=Homo sapiens OX=9606 GN=ACTN1 PE=1 SV=2;tr|H9KV75|H9KV75_HUMAN Alpha-actinin-1 OS=Homo sapiens OX=9606 GN=ACTN1 PE=1 SV=1	Homo sapiens	5	15	3	18.3	103.06	892	0	3.6587	18.3	4370400	4370400	0.00591755	3			375
O95400	CD2 antigen cytoplasmic tail-binding protein 2	CD2BP2	sp|O95400|CD2B2_HUMAN CD2 antigen cytoplasmic tail-binding protein 2 OS=Homo sapiens OX=9606 GN=CD2BP2 PE=1 SV=1	Homo sapiens	1	3	3	12.9	37.646	341	0	24.512	12.9	4325400	4325400	0.00585662	5			338
D6RAX7;D6RFN0;Q9BT78;D6RD63	COP9 signalosome complex subunit 4	COPS4	tr|D6RAX7|D6RAX7_HUMAN COP9 signalosome complex subunit 4 OS=Homo sapiens OX=9606 GN=COPS4 PE=1 SV=1;tr|D6RFN0|D6RFN0_HUMAN COP9 signalosome complex subunit 4 OS=Homo sapiens OX=9606 GN=COPS4 PE=1 SV=1;sp|Q9BT78|CSN4_HUMAN COP9 signalosome complex subunit	Homo sapiens	4	2	2	5	47.726	420	0	3.7821	5	4272800	4272800	0.0057854	2			148
A0A0C4DGH5;Q86VP6;H0YH27	Cullin-associated NEDD8-dissociated protein 1	CAND1	tr|A0A0C4DGH5|A0A0C4DGH5_HUMAN Cullin-associated NEDD8-dissociated protein 1 (Fragment) OS=Homo sapiens OX=9606 GN=CAND1 PE=1 SV=1;sp|Q86VP6|CAND1_HUMAN Cullin-associated NEDD8-dissociated protein 1 OS=Homo sapiens OX=9606 GN=CAND1 PE=1 SV=2;tr|H0YH27|H0YH	Homo sapiens	3	2	2	2.9	85.408	770	0	4.9765	2.9	4257300	4257300	0.00576441	2			45
K7EN45;Q13526;K7EMU7	Peptidyl-prolyl cis-trans isomerase NIMA-interacting 1	PIN1	tr|K7EN45|K7EN45_HUMAN Peptidyl-prolyl cis-trans isomerase (Fragment) OS=Homo sapiens OX=9606 GN=PIN1 PE=1 SV=1;sp|Q13526|PIN1_HUMAN Peptidyl-prolyl cis-trans isomerase NIMA-interacting 1 OS=Homo sapiens OX=9606 GN=PIN1 PE=1 SV=1;tr|K7EMU7|K7EMU7_HUMAN Pep	Homo sapiens	3	2	2	33.3	9.8329	90	0	8.3386	33.3	4174600	4174600	0.00565244	2			262
J3KSJ0;A0A087WY81;J3KRB3;A0A087WWH0;J3QS96;A0A087WXM6;J3QQT2;J3KRX5;A0A0A6YYL6;P18621	60S ribosomal protein L17	RPL17;RPL17-C18orf32	tr|J3KSJ0|J3KSJ0_HUMAN 60S ribosomal protein L17 (Fragment) OS=Homo sapiens OX=9606 GN=RPL17 PE=1 SV=1;tr|A0A087WY81|A0A087WY81_HUMAN 60S ribosomal protein L17 (Fragment) OS=Homo sapiens OX=9606 GN=RPL17 PE=1 SV=6;tr|J3KRB3|J3KRB3_HUMAN 60S ribosomal prote	Homo sapiens	10	1	1	21.4	6.5045	56	0.0016807	2.0891	21.4	4114500	4114500	0.00557106	1			17
A0A6Q8PFN1;A0A6Q8PF87;A0A6Q8PFA7;A0A6Q8PFQ8;A0A6Q8PFS4;A0A6Q8PHC0;A0A6Q8PHJ9;A0A6Q8PG15;A0A6Q8PFM5;A0A6Q8PFE1;O95831	Apoptosis-inducing factor 1, mitochondrial	AIFM1	tr|A0A6Q8PFN1|A0A6Q8PFN1_HUMAN Apoptosis-inducing factor 1, mitochondrial (Fragment) OS=Homo sapiens OX=9606 GN=AIFM1 PE=1 SV=1;tr|A0A6Q8PF87|A0A6Q8PF87_HUMAN Apoptosis-inducing factor 1, mitochondrial OS=Homo sapiens OX=9606 GN=AIFM1 PE=1 SV=1;tr|A0A6Q8PF	Homo sapiens	11	1	1	18	6.9701	61	0	2.8791	18	4107200	4107200	0.00556118	1			91
Q9P287	BRCA2 and CDKN1A-interacting protein	BCCIP	sp|Q9P287|BCCIP_HUMAN BRCA2 and CDKN1A-interacting protein OS=Homo sapiens OX=9606 GN=BCCIP PE=1 SV=1	Homo sapiens	1	1	1	5.1	35.979	314	0	11.815	5.1	4086900	4086900	0.00553369	2			638
Q5SRQ3;Q5SRQ6;N0E472;A0A0G2JM12;P67870	Casein kinase II subunit beta	CSNK2B-LY6G5B-1181;CSNK2B;CSNK2B-LY6G5B--991	tr|Q5SRQ3|Q5SRQ3_HUMAN Casein kinase II subunit beta OS=Homo sapiens OX=9606 GN=CSNK2B PE=1 SV=1;tr|Q5SRQ6|Q5SRQ6_HUMAN Casein kinase II subunit beta OS=Homo sapiens OX=9606 GN=CSNK2B PE=1 SV=2;tr|N0E472|N0E472_HUMAN Casein kinase II subunit beta OS=Homo s	Homo sapiens	5	1	1	4.8	26.673	228	0	2.8627	4.8	4031200	4031200	0.00545827	1			51
Q8WVC0	RNA polymerase-associated protein LEO1	LEO1	sp|Q8WVC0|LEO1_HUMAN RNA polymerase-associated protein LEO1 OS=Homo sapiens OX=9606 GN=LEO1 PE=1 SV=1	Homo sapiens	1	2	2	6	75.403	666	0	5.2998	6	4029500	4029500	0.00545597	3			593
Q15181;Q5SQT6	Inorganic pyrophosphatase	PPA1	sp|Q15181|IPYR_HUMAN Inorganic pyrophosphatase OS=Homo sapiens OX=9606 GN=PPA1 PE=1 SV=2;tr|Q5SQT6|Q5SQT6_HUMAN Inorganic diphosphatase OS=Homo sapiens OX=9606 GN=PPA1 PE=1 SV=1	Homo sapiens	2	2	2	14.2	32.66	289	0	3.5226	14.2	4025900	4025900	0.0054511	2			546
B4E135;M0R0Q7;P18858;F5GZ28	DNA ligase;DNA ligase 1	LIG1	tr|B4E135|B4E135_HUMAN DNA ligase 1 OS=Homo sapiens OX=9606 GN=LIG1 PE=1 SV=1;tr|M0R0Q7|M0R0Q7_HUMAN DNA ligase OS=Homo sapiens OX=9606 GN=LIG1 PE=1 SV=1;sp|P18858|DNLI1_HUMAN DNA ligase 1 OS=Homo sapiens OX=9606 GN=LIG1 PE=1 SV=1;tr|F5GZ28|F5GZ28_HUMAN DN	Homo sapiens	4	2	2	6	45.025	415	0.0017575	2.3948	6	4019500	4019500	0.00544243	2			117
P55060	Exportin-2	CSE1L	sp|P55060|XPO2_HUMAN Exportin-2 OS=Homo sapiens OX=9606 GN=CSE1L PE=1 SV=3	Homo sapiens	1	1	1	1.8	110.42	971	0.0031596	1.7424	1.8	4018300	4018300	0.00544081	1			462
B1AHB1;P33992;B1AHB2	DNA helicase;DNA replication licensing factor MCM5	MCM5	tr|B1AHB1|B1AHB1_HUMAN DNA helicase OS=Homo sapiens OX=9606 GN=MCM5 PE=1 SV=1;sp|P33992|MCM5_HUMAN DNA replication licensing factor MCM5 OS=Homo sapiens OX=9606 GN=MCM5 PE=1 SV=5;tr|B1AHB2|B1AHB2_HUMAN DNA helicase (Fragment) OS=Homo sapiens OX=9606 GN=MCM	Homo sapiens	3	2	2	4.1	77.592	691	0	3.2533	4.1	4001900	4001900	0.0054186	2			104
O00425	Insulin-like growth factor 2 mRNA-binding protein 3	IGF2BP3	sp|O00425|IF2B3_HUMAN Insulin-like growth factor 2 mRNA-binding protein 3 OS=Homo sapiens OX=9606 GN=IGF2BP3 PE=1 SV=2	Homo sapiens	1	3	2	8.1	63.704	579	0	28.417	8.1	3990500	3990500	0.00540317	2			300
Q9UBT2;U3KQ93;K7ESK7;K7EPL2	SUMO-activating enzyme subunit 2	UBA2	sp|Q9UBT2|SAE2_HUMAN SUMO-activating enzyme subunit 2 OS=Homo sapiens OX=9606 GN=UBA2 PE=1 SV=2;tr|U3KQ93|U3KQ93_HUMAN SUMO-activating enzyme subunit 2 OS=Homo sapiens OX=9606 GN=UBA2 PE=1 SV=1;tr|K7ESK7|K7ESK7_HUMAN SUMO-activating enzyme subunit 2 (Fragm	Homo sapiens	4	2	2	2.5	71.223	640	0	3.0095	2.5	3960700	3960700	0.00536282	2			639
P62191;G3V4X1	26S protease regulatory subunit 4	PSMC1	sp|P62191|PRS4_HUMAN 26S proteasome regulatory subunit 4 OS=Homo sapiens OX=9606 GN=PSMC1 PE=1 SV=1	Homo sapiens	2	3	3	9.5	49.184	440	0	2.7915	9.5	3928500	3928500	0.00531922	1			476
P39748;I3L3E9;F5H1Y3	Flap endonuclease 1	FEN1	sp|P39748|FEN1_HUMAN Flap endonuclease 1 OS=Homo sapiens OX=9606 GN=FEN1 PE=1 SV=1;tr|I3L3E9|I3L3E9_HUMAN Flap endonuclease 1 (Fragment) OS=Homo sapiens OX=9606 GN=FEN1 PE=1 SV=1;tr|F5H1Y3|F5H1Y3_HUMAN Flap endonuclease 1 (Fragment) OS=Homo sapiens OX=9606	Homo sapiens	3	2	2	8.2	42.592	380	0	3.9189	8.2	3904400	3904400	0.00528659	4			431
Q59GN2;P62891	Putative 60S ribosomal protein L39-like 5;60S ribosomal protein L39	RPL39P5;RPL39	sp|Q59GN2|R39L5_HUMAN Putative 60S ribosomal protein L39-like 5 OS=Homo sapiens OX=9606 GN=RPL39P5 PE=5 SV=2;sp|P62891|RL39_HUMAN 60S ribosomal protein L39 OS=Homo sapiens OX=9606 GN=RPL39 PE=1 SV=2	Homo sapiens	2	1	1	19.6	6.3225	51	0.0016611	2.0004	19.6	3897400	3897400	0.00527711	1			483
H3BQZ7;Q1KMD3	Heterogeneous nuclear ribonucleoprotein U-like protein 2	HNRNPUL2-BSCL2;HNRNPUL2	tr|H3BQZ7|H3BQZ7_HUMAN HCG2044799 OS=Homo sapiens OX=9606 GN=HNRNPUL2-BSCL2 PE=4 SV=1;sp|Q1KMD3|HNRL2_HUMAN Heterogeneous nuclear ribonucleoprotein U-like protein 2 OS=Homo sapiens OX=9606 GN=HNRNPUL2 PE=1 SV=1	Homo sapiens	2	1	1	3.2	84.69	746	0	9.3773	3.2	3783700	3783700	0.00512316	4			237
K7EJE8;K7EKE6;P36776;K7EQF8	Lon protease homolog, mitochondrial	LONP1	tr|K7EJE8|K7EJE8_HUMAN Lon protease homolog, mitochondrial OS=Homo sapiens OX=9606 GN=LONP1 PE=1 SV=1;tr|K7EKE6|K7EKE6_HUMAN Lon protease homolog, mitochondrial OS=Homo sapiens OX=9606 GN=LONP1 PE=1 SV=1;sp|P36776|LONM_HUMAN Lon protease homolog, mitochond	Homo sapiens	4	3	3	4.9	93.296	829	0	3.5077	4.9	3746500	3746500	0.00507279	4			258
P52597;A0A1B0GW42	Heterogeneous nuclear ribonucleoprotein F;Heterogeneous nuclear ribonucleoprotein F, N-terminally processed	HNRNPF	sp|P52597|HNRPF_HUMAN Heterogeneous nuclear ribonucleoprotein F OS=Homo sapiens OX=9606 GN=HNRNPF PE=1 SV=3	Homo sapiens	2	4	2	16.6	45.671	415	0	4.3179	16.6	3731400	3731400	0.00505234	3			456
Q15293	Reticulocalbin-1	RCN1	sp|Q15293|RCN1_HUMAN Reticulocalbin-1 OS=Homo sapiens OX=9606 GN=RCN1 PE=1 SV=1	Homo sapiens	1	2	2	10.9	38.89	331	0	31.092	10.9	3672800	3672800	0.004973	2			548
A8MUD9;P18124	60S ribosomal protein L7	RPL7	tr|A8MUD9|A8MUD9_HUMAN 60S ribosomal protein L7 OS=Homo sapiens OX=9606 GN=RPL7 PE=1 SV=1;sp|P18124|RL7_HUMAN 60S ribosomal protein L7 OS=Homo sapiens OX=9606 GN=RPL7 PE=1 SV=1	Homo sapiens	2	2	2	12	24.433	208	0	2.8389	12	3663400	3663400	0.00496027	3			100
H0YM46;H0YNF5;H0YL72;P50213	Isocitrate dehydrogenase [NAD] subunit alpha, mitochondrial	IDH3A	tr|H0YM46|H0YM46_HUMAN Isocitrate dehydrogenase [NAD] subunit alpha, mitochondrial (Fragment) OS=Homo sapiens OX=9606 GN=IDH3A PE=1 SV=1;tr|H0YNF5|H0YNF5_HUMAN Isocitrate dehydrogenase [NAD] subunit alpha, mitochondrial OS=Homo sapiens OX=9606 GN=IDH3A PE=	Homo sapiens	4	2	2	22.9	5.1738	48	0	3.9221	22.9	3662900	3662900	0.00495959	2			233
G3V582		GPHN	tr|G3V582|G3V582_HUMAN Molybdopterin molybdenumtransferase OS=Homo sapiens OX=9606 GN=GPHN PE=1 SV=1	Homo sapiens	1	9	1	29.7	41.356	380	0.0017606	2.4117	29.7	3649000	3649000	0.00494077	4			220
A0A0A0MTN9;J3QQX3;A0A0A0MTR6;A0A0C4DFN8;A0A0C4DGN7;A0A0A0MSZ4;A0A0A0MT64;P22570	NADPH:adrenodoxin oxidoreductase, mitochondrial	FDXR	tr|A0A0A0MTN9|A0A0A0MTN9_HUMAN NADPH:adrenodoxin oxidoreductase, mitochondrial OS=Homo sapiens OX=9606 GN=FDXR PE=1 SV=1;tr|J3QQX3|J3QQX3_HUMAN NADPH:adrenodoxin oxidoreductase, mitochondrial OS=Homo sapiens OX=9606 GN=FDXR PE=1 SV=2;tr|A0A0A0MTR6|A0A0A0MT	Homo sapiens	8	2	2	7.7	48.027	439	0	10.951	7.7	3645100	3645100	0.00493549	4			39
E5RJR5;P63208	S-phase kinase-associated protein 1	SKP1	tr|E5RJR5|E5RJR5_HUMAN S-phase kinase-associated protein 1 OS=Homo sapiens OX=9606 GN=SKP1 PE=1 SV=1;sp|P63208|SKP1_HUMAN S-phase kinase-associated protein 1 OS=Homo sapiens OX=9606 GN=SKP1 PE=1 SV=2	Homo sapiens	2	2	2	11	18.72	163	0	2.9051	11	3618700	3618700	0.00489975	1			158
B1AK87;B1AK85;B1AK88;P47756;A0A6I8PRV6	F-actin-capping protein subunit beta	CAPZB	tr|B1AK87|B1AK87_HUMAN F-actin-capping protein subunit beta OS=Homo sapiens OX=9606 GN=CAPZB PE=1 SV=2;tr|B1AK85|B1AK85_HUMAN F-actin-capping protein subunit beta OS=Homo sapiens OX=9606 GN=CAPZB PE=1 SV=1;tr|B1AK88|B1AK88_HUMAN F-actin-capping protein sub	Homo sapiens	5	2	2	19.7	27.44	244	0	24.997	19.7	3612200	3612200	0.00489094	5			105
A2A3R5;P62753	40S ribosomal protein S6	RPS6	tr|A2A3R5|A2A3R5_HUMAN 40S ribosomal protein S6 OS=Homo sapiens OX=9606 GN=RPS6 PE=1 SV=1;sp|P62753|RS6_HUMAN 40S ribosomal protein S6 OS=Homo sapiens OX=9606 GN=RPS6 PE=1 SV=1	Homo sapiens	2	2	2	12.8	24.968	218	0	4.6512	12.8	3606200	3606200	0.00488282	2			95
Q7RTV0	PHD finger-like domain-containing protein 5A	PHF5A	sp|Q7RTV0|PHF5A_HUMAN PHD finger-like domain-containing protein 5A OS=Homo sapiens OX=9606 GN=PHF5A PE=1 SV=1	Homo sapiens	1	2	2	28.2	12.405	110	0	45.279	28.2	3600200	3600200	0.0048747	2			581
Q12765;B8ZZP4;C9J7U9;C9K052	Secernin-1	SCRN1	sp|Q12765|SCRN1_HUMAN Secernin-1 OS=Homo sapiens OX=9606 GN=SCRN1 PE=1 SV=2	Homo sapiens	4	3	3	9.9	46.382	414	0	7.4198	9.9	3590800	3590800	0.00486197	3			515
P04350;M0QY85;M0R2D3;M0R278;M0R0X0;M0QY37;M0QX14;M0QZL7;M0QYM7;M0R042;A6NNZ2;M0R1I1;M0R2T4;Q9H4B7;A0A075B724;K7EL29	Tubulin beta-4A chain	TUBB4A	sp|P04350|TBB4A_HUMAN Tubulin beta-4A chain OS=Homo sapiens OX=9606 GN=TUBB4A PE=1 SV=2	Homo sapiens	16	22	1	63.1	49.585	444	0	83.569	57.9	3588900	3588900	0.0048594	4			342
Q9UHV9	Prefoldin subunit 2	PFDN2	sp|Q9UHV9|PFD2_HUMAN Prefoldin subunit 2 OS=Homo sapiens OX=9606 GN=PFDN2 PE=1 SV=1	Homo sapiens	1	2	2	22.1	16.648	154	0	55.218	22.1	3561700	3561700	0.00482257	4			640
Q14118	Dystroglycan;Alpha-dystroglycan;Beta-dystroglycan	DAG1	sp|Q14118|DAG1_HUMAN Dystroglycan OS=Homo sapiens OX=9606 GN=DAG1 PE=1 SV=2	Homo sapiens	1	1	1	2.3	97.44	895	0	8.052	2.3	3537900	3537900	0.00479034	2			531
P16989;A0A0D9SEI8	Y-box-binding protein 3	YBX3	sp|P16989|YBOX3_HUMAN Y-box-binding protein 3 OS=Homo sapiens OX=9606 GN=YBX3 PE=1 SV=4;tr|A0A0D9SEI8|A0A0D9SEI8_HUMAN Y-box-binding protein 3 (Fragment) OS=Homo sapiens OX=9606 GN=YBX3 PE=1 SV=1	Homo sapiens	2	5	1	15.9	40.089	372	0	22.727	15.9	3511600	3511600	0.00475473	1			387
C9JCK5;A0A024RA52;P25787	Proteasome subunit alpha type;Proteasome subunit alpha type-2	PSMA2	tr|C9JCK5|C9JCK5_HUMAN Proteasome subunit alpha type-2 OS=Homo sapiens OX=9606 GN=PSMA2 PE=1 SV=1;tr|A0A024RA52|A0A024RA52_HUMAN Proteasome subunit alpha type OS=Homo sapiens OX=9606 GN=PSMA2 PE=1 SV=1;sp|P25787|PSA2_HUMAN Proteasome subunit alpha type-2 O	Homo sapiens	3	1	1	11.6	18.607	164	0	10.905	11.6	3487900	3487900	0.00472264	4			1
D6RFJ3;H0Y8J7;D6RBW1;P06730	Eukaryotic translation initiation factor 4E	EIF4E	tr|D6RFJ3|D6RFJ3_HUMAN Eukaryotic translation initiation factor 4E OS=Homo sapiens OX=9606 GN=EIF4E PE=1 SV=1;tr|H0Y8J7|H0Y8J7_HUMAN Eukaryotic translation initiation factor 4E (Fragment) OS=Homo sapiens OX=9606 GN=EIF4E PE=1 SV=1;tr|D6RBW1|D6RBW1_HUMAN Eu	Homo sapiens	4	1	1	50	4.7861	42	0.0016584	1.9846	50	3470900	3470900	0.00469962	1			150
A8K968;A0A0A0MRA8;A0A0A0MSA4;Q9Y2J2;A0A0J9YY18;J3QS55;A0A0J9YW31;A0A1B0GTF8	Band 4.1-like protein 3;Band 4.1-like protein 3, N-terminally processed	EPB41L3	tr|A8K968|A8K968_HUMAN Band 4.1-like protein 3 OS=Homo sapiens OX=9606 GN=EPB41L3 PE=1 SV=1;tr|A0A0A0MRA8|A0A0A0MRA8_HUMAN Band 4.1-like protein 3 OS=Homo sapiens OX=9606 GN=EPB41L3 PE=1 SV=1;tr|A0A0A0MSA4|A0A0A0MSA4_HUMAN Band 4.1-like protein 3 OS=Homo s	Homo sapiens	8	3	3	6.6	84.711	756	0	12.853	6.6	3470400	3470400	0.00469895	4			35
I3L3H2;P38919	Eukaryotic initiation factor 4A-III;Eukaryotic initiation factor 4A-III, N-terminally processed	EIF4A3	tr|I3L3H2|I3L3H2_HUMAN RNA helicase OS=Homo sapiens OX=9606 GN=EIF4A3 PE=1 SV=2;sp|P38919|IF4A3_HUMAN Eukaryotic initiation factor 4A-III OS=Homo sapiens OX=9606 GN=EIF4A3 PE=1 SV=4	Homo sapiens	2	2	1	6.7	44.511	390	0	3.4725	6.7	3426300	3426300	0.00463923	3			246
H0YLE8;A0A0J9YXZ5;P46940	Ras GTPase-activating-like protein IQGAP1	IQGAP1	tr|H0YLE8|H0YLE8_HUMAN Ras GTPase-activating-like protein IQGAP1 OS=Homo sapiens OX=9606 GN=IQGAP1 PE=1 SV=1;tr|A0A0J9YXZ5|A0A0J9YXZ5_HUMAN Ras GTPase-activating-like protein IQGAP1 OS=Homo sapiens OX=9606 GN=IQGAP1 PE=1 SV=1;sp|P46940|IQGA1_HUMAN Ras GTPa	Homo sapiens	3	1	1	2.2	124.79	1085	0.0017331	2.3259	2.2	3410700	3410700	0.00461811	3			56
Q9UJX3	Anaphase-promoting complex subunit 7	ANAPC7	sp|Q9UJX3|APC7_HUMAN Anaphase-promoting complex subunit 7 OS=Homo sapiens OX=9606 GN=ANAPC7 PE=1 SV=4	Homo sapiens	1	1	1	4	66.855	599	0	9.3719	4	3406000	3406000	0.00461175	2			642
E9PS23;E9PP50;P23528	Cofilin-1	CFL1	tr|E9PS23|E9PS23_HUMAN Cofilin, non-muscle isoform (Fragment) OS=Homo sapiens OX=9606 GN=CFL1 PE=1 SV=8;tr|E9PP50|E9PP50_HUMAN Cofilin, non-muscle isoform (Fragment) OS=Homo sapiens OX=9606 GN=CFL1 PE=1 SV=8;sp|P23528|COF1_HUMAN Cofilin-1 OS=Homo sapiens O	Homo sapiens	3	2	2	20	10.08	90	0	4.4548	20	3361900	3361900	0.00455204	2			190
X6RJP6;P37802	Transgelin-2	TAGLN2	tr|X6RJP6|X6RJP6_HUMAN Transgelin-2 (Fragment) OS=Homo sapiens OX=9606 GN=TAGLN2 PE=1 SV=1;sp|P37802|TAGL2_HUMAN Transgelin-2 OS=Homo sapiens OX=9606 GN=TAGLN2 PE=1 SV=3	Homo sapiens	2	1	1	11.8	21.086	187	0	5.8298	11.8	3361200	3361200	0.00455109	3			428
Q14566	DNA replication licensing factor MCM6	MCM6	sp|Q14566|MCM6_HUMAN DNA replication licensing factor MCM6 OS=Homo sapiens OX=9606 GN=MCM6 PE=1 SV=1	Homo sapiens	1	1	1	1.7	92.888	821	0.0017123	2.2253	1.7	3323700	3323700	0.00450031	2			537
E7EM64;Q7L5N1;H7C3T0	COP9 signalosome complex subunit 6	COPS6	tr|E7EM64|E7EM64_HUMAN COP9 signalosome complex subunit 6 OS=Homo sapiens OX=9606 GN=COPS6 PE=1 SV=1;sp|Q7L5N1|CSN6_HUMAN COP9 signalosome complex subunit 6 OS=Homo sapiens OX=9606 GN=COPS6 PE=1 SV=1;tr|H7C3T0|H7C3T0_HUMAN COP9 signalosome complex subunit	Homo sapiens	3	2	2	12	36.064	326	0	3.1699	12	3320000	3320000	0.0044953	1			159
Q12797	Aspartyl/asparaginyl beta-hydroxylase	ASPH	sp|Q12797|ASPH_HUMAN Aspartyl/asparaginyl beta-hydroxylase OS=Homo sapiens OX=9606 GN=ASPH PE=1 SV=3	Homo sapiens	1	2	2	3.2	85.862	758	0	2.668	3.2	3310700	3310700	0.00448271	2			516
Q00577	Transcriptional activator protein Pur-alpha	PURA	sp|Q00577|PURA_HUMAN Transcriptional activator protein Pur-alpha OS=Homo sapiens OX=9606 GN=PURA PE=1 SV=2	Homo sapiens	1	1	1	8.7	34.91	322	0.006192	1.593	8.7	3310400	3310400	0.00448231	1			500
Q9BRP1	Programmed cell death protein 2-like	PDCD2L	sp|Q9BRP1|PDD2L_HUMAN Programmed cell death protein 2-like OS=Homo sapiens OX=9606 GN=PDCD2L PE=1 SV=1	Homo sapiens	1	1	1	3.4	39.416	358	0	4.6158	3.4	3304400	3304400	0.00447418	2			619
Q9NRF9	DNA polymerase epsilon subunit 3	POLE3	sp|Q9NRF9|DPOE3_HUMAN DNA polymerase epsilon subunit 3 OS=Homo sapiens OX=9606 GN=POLE3 PE=1 SV=1	Homo sapiens	1	1	1	10.9	16.859	147	0	3.8467	10.9	3284100	3284100	0.00444669	2			630
A0A2R8YEE8;A0A0G2JSE9;C9JTA6;A0A2R8Y5N5;G5E975;Q12824;A0A0U1RQQ2;A0A0U1RRB8	SWI/SNF-related matrix-associated actin-dependent regulator of chromatin subfamily B member 1	SMARCB1	tr|A0A2R8YEE8|A0A2R8YEE8_HUMAN SWI/SNF-related matrix-associated actin-dependent regulator of chromatin subfamily B member 1 (Fragment) OS=Homo sapiens OX=9606 GN=SMARCB1 PE=1 SV=1;tr|A0A0G2JSE9|A0A0G2JSE9_HUMAN SWI/SNF-related matrix-associated actin-depe	Homo sapiens	8	2	2	18.1	23.419	216	0	3.96	18.1	3262200	3262200	0.00441704	2			52
Q9BQE3;F5H5D3	Tubulin alpha-1C chain	TUBA1C	sp|Q9BQE3|TBA1C_HUMAN Tubulin alpha-1C chain OS=Homo sapiens OX=9606 GN=TUBA1C PE=1 SV=1;tr|F5H5D3|F5H5D3_HUMAN Tubulin alpha chain OS=Homo sapiens OX=9606 GN=TUBA1C PE=1 SV=1	Homo sapiens	2	25	1	68.8	49.895	449	0	22.49	68.8	3258700	3258700	0.0044123	2			618
G3V4N7;P12277	Creatine kinase B-type	CKB	tr|G3V4N7|G3V4N7_HUMAN Creatine kinase (Fragment) OS=Homo sapiens OX=9606 GN=CKB PE=1 SV=1;sp|P12277|KCRB_HUMAN Creatine kinase B-type OS=Homo sapiens OX=9606 GN=CKB PE=1 SV=1	Homo sapiens	2	1	1	9.7	24.116	217	0	13.866	9.7	3254600	3254600	0.00440675	3			219
H0Y5J4;B4DDD6;Q9UJU6	Drebrin-like protein	DBNL	tr|H0Y5J4|H0Y5J4_HUMAN Drebrin-like protein (Fragment) OS=Homo sapiens OX=9606 GN=DBNL PE=1 SV=1;tr|B4DDD6|B4DDD6_HUMAN Drebrin-like protein OS=Homo sapiens OX=9606 GN=DBNL PE=1 SV=1;sp|Q9UJU6|DBNL_HUMAN Drebrin-like protein OS=Homo sapiens OX=9606 GN=DBNL	Homo sapiens	3	2	2	7.5	40.16	359	0	42.587	7.5	3243000	3243000	0.00439105	4			112
G3V279;P84090	Enhancer of rudimentary homolog	ERH	tr|G3V279|G3V279_HUMAN Enhancer of rudimentary homolog OS=Homo sapiens OX=9606 GN=ERH PE=1 SV=1;sp|P84090|ERH_HUMAN Enhancer of rudimentary homolog OS=Homo sapiens OX=9606 GN=ERH PE=1 SV=1	Homo sapiens	2	1	1	22.5	8.2033	71	0.0076453	1.5442	22.5	3239000	3239000	0.00438563	1			215
G3V340;Q13033;G3V3G7	Striatin-3	STRN3	tr|G3V340|G3V340_HUMAN Striatin-3 OS=Homo sapiens OX=9606 GN=STRN3 PE=1 SV=1;sp|Q13033|STRN3_HUMAN Striatin-3 OS=Homo sapiens OX=9606 GN=STRN3 PE=1 SV=3;tr|G3V3G7|G3V3G7_HUMAN Striatin-3 (Fragment) OS=Homo sapiens OX=9606 GN=STRN3 PE=1 SV=1	Homo sapiens	3	2	2	7.5	36.271	332	0	46.608	7.5	3225200	3225200	0.00436694	2			217
D6R974;D6R956;P09936;D6RE83	Ubiquitin carboxyl-terminal hydrolase;Ubiquitin carboxyl-terminal hydrolase isozyme L1	UCHL1	tr|D6R974|D6R974_HUMAN Ubiquitin carboxyl-terminal hydrolase OS=Homo sapiens OX=9606 GN=UCHL1 PE=1 SV=1;tr|D6R956|D6R956_HUMAN Ubiquitin carboxyl-terminal hydrolase OS=Homo sapiens OX=9606 GN=UCHL1 PE=1 SV=1;sp|P09936|UCHL1_HUMAN Ubiquitin carboxyl-termina	Homo sapiens	4	2	2	25.6	17.361	156	0	33.256	25.6	3207900	3207900	0.00434352	3			146
J3KSU3;F8W7A7;Q5BJE1	Coiled-coil domain-containing protein 178	CCDC178	tr|J3KSU3|J3KSU3_HUMAN Coiled-coil domain-containing protein 178 (Fragment) OS=Homo sapiens OX=9606 GN=CCDC178 PE=4 SV=1;tr|F8W7A7|F8W7A7_HUMAN Coiled-coil domain-containing protein 178 OS=Homo sapiens OX=9606 GN=CCDC178 PE=1 SV=1;sp|Q5BJE1|CC178_HUMAN Coi	Homo sapiens	3	1	1	1.9	43.227	364	0.0046802	1.6206	1.9	3197000	3197000	0.00432876	0			210
Q14166;V9GY16	Tubulin--tyrosine ligase-like protein 12	TTLL12	sp|Q14166|TTL12_HUMAN Tubulin--tyrosine ligase-like protein 12 OS=Homo sapiens OX=9606 GN=TTLL12 PE=1 SV=2;tr|V9GY16|V9GY16_HUMAN Tubulin--tyrosine ligase-like protein 12 OS=Homo sapiens OX=9606 GN=TTLL12 PE=1 SV=1	Homo sapiens	2	2	2	6.1	74.403	644	0	4.4048	6.1	3153100	3153100	0.00426932	3			534
H0Y4R1;P12268	Inosine-5-monophosphate dehydrogenase 2	IMPDH2	tr|H0Y4R1|H0Y4R1_HUMAN Inosine-5-monophosphate dehydrogenase 2 (Fragment) OS=Homo sapiens OX=9606 GN=IMPDH2 PE=1 SV=1;sp|P12268|IMDH2_HUMAN Inosine-5-monophosphate dehydrogenase 2 OS=Homo sapiens OX=9606 GN=IMPDH2 PE=1 SV=2	Homo sapiens	2	2	2	3.8	50.957	470	0	5.8512	3.8	3050800	3050800	0.0041308	3			224
A0A6Q8PGW4;A0A6Q8PGI6;A0A6Q8PGA8;A0A6Q8PHH9;A0A6Q8PGZ8;P41250	Glycine--tRNA ligase	GARS	tr|A0A6Q8PGW4|A0A6Q8PGW4_HUMAN Diadenosine tetraphosphate synthetase OS=Homo sapiens OX=9606 GN=GARS1 PE=1 SV=1;tr|A0A6Q8PGI6|A0A6Q8PGI6_HUMAN Diadenosine tetraphosphate synthetase OS=Homo sapiens OX=9606 GN=GARS1 PE=1 SV=1;tr|A0A6Q8PGA8|A0A6Q8PGA8_HUMAN D	Homo sapiens	6	1	1	4.2	69.931	616	0	3.356	4.2	3050000	3050000	0.00412972	4			93
P62136;E9PMD7;F8VR82;F8VYE8;F8W0W8;P36873	Serine/threonine-protein phosphatase PP1-alpha catalytic subunit;Serine/threonine-protein phosphatase;Serine/threonine-protein phosphatase PP1-gamma catalytic subunit	PPP1CA;PPP1CC	sp|P62136|PP1A_HUMAN Serine/threonine-protein phosphatase PP1-alpha catalytic subunit OS=Homo sapiens OX=9606 GN=PPP1CA PE=1 SV=1;tr|E9PMD7|E9PMD7_HUMAN Serine/threonine-protein phosphatase (Fragment) OS=Homo sapiens OX=9606 GN=PPP1CA PE=1 SV=1;tr|F8VR82|F	Homo sapiens	6	2	2	8.5	37.512	330	0.0016722	2.0463	8.5	2978400	2978400	0.00403277	2			475
P08579	U2 small nuclear ribonucleoprotein B	SNRPB2	sp|P08579|RU2B_HUMAN U2 small nuclear ribonucleoprotein B OS=Homo sapiens OX=9606 GN=SNRPB2 PE=1 SV=1	Homo sapiens	1	1	1	10.2	25.486	225	0	14.48	10.2	2973000	2973000	0.00402546	2			359
M0R0C3;M0R2F8;Q3ZCQ8	Mitochondrial import inner membrane translocase subunit TIM50	TIMM50	tr|M0R0C3|M0R0C3_HUMAN Mitochondrial import inner membrane translocase subunit TIM50 (Fragment) OS=Homo sapiens OX=9606 GN=TIMM50 PE=1 SV=1;tr|M0R2F8|M0R2F8_HUMAN Mitochondrial import inner membrane translocase subunit TIM50 OS=Homo sapiens OX=9606 GN=TIMM	Homo sapiens	3	1	1	13.5	11.866	104	0	26.908	13.5	2955100	2955100	0.00400123	2			287
H7C3C1;H7C2I6;H7C224;D3YTB5;P51617	Interleukin-1 receptor-associated kinase 1	IRAK1	tr|H7C3C1|H7C3C1_HUMAN Interleukin-1 receptor-associated kinase 1 (Fragment) OS=Homo sapiens OX=9606 GN=IRAK1 PE=1 SV=1;tr|H7C2I6|H7C2I6_HUMAN Interleukin-1 receptor-associated kinase 1 (Fragment) OS=Homo sapiens OX=9606 GN=IRAK1 PE=1 SV=1;tr|H7C224|H7C224	Homo sapiens	5	1	1	12.4	22.567	218	0	2.8832	12.4	2859200	2859200	0.00387138	2			144
O43815	Striatin	STRN	sp|O43815|STRN_HUMAN Striatin OS=Homo sapiens OX=9606 GN=STRN PE=1 SV=4	Homo sapiens	1	1	1	2.8	86.131	780	0	19.47	2.8	2852800	2852800	0.00386271	3			313
H0YJZ6;Q9UPY3	Endoribonuclease Dicer	DICER1	tr|H0YJZ6|H0YJZ6_HUMAN Endoribonuclease Dicer OS=Homo sapiens OX=9606 GN=DICER1 PE=1 SV=2;sp|Q9UPY3|DICER_HUMAN Endoribonuclease Dicer OS=Homo sapiens OX=9606 GN=DICER1 PE=1 SV=3	Homo sapiens	2	2	2	1.6	195.09	1715	0	3.0922	1.6	2852800	2852800	0.00386271	2			228
Q9H9J2	39S ribosomal protein L44, mitochondrial	MRPL44	sp|Q9H9J2|RM44_HUMAN 39S ribosomal protein L44, mitochondrial OS=Homo sapiens OX=9606 GN=MRPL44 PE=1 SV=1	Homo sapiens	1	1	1	3.3	37.535	332	0.0016313	1.8794	3.3	2803700	2803700	0.00379623	1			628
O00299	Chloride intracellular channel protein 1	CLIC1	sp|O00299|CLIC1_HUMAN Chloride intracellular channel protein 1 OS=Homo sapiens OX=9606 GN=CLIC1 PE=1 SV=4	Homo sapiens	1	3	3	23.7	26.922	241	0	3.7414	23.7	2799100	2799100	0.00379	3			298
Q8WY54	Protein phosphatase 1E	PPM1E	sp|Q8WY54|PPM1E_HUMAN Protein phosphatase 1E OS=Homo sapiens OX=9606 GN=PPM1E PE=1 SV=3	Homo sapiens	1	2	2	4.4	83.951	755	0	23.227	4.4	2780700	2780700	0.00376509	2			596
Q92615;A0A087X183;H0Y641;H0Y4V9	La-related protein 4B	LARP4B	sp|Q92615|LAR4B_HUMAN La-related protein 4B OS=Homo sapiens OX=9606 GN=LARP4B PE=1 SV=3;tr|A0A087X183|A0A087X183_HUMAN La-related protein 4B (Fragment) OS=Homo sapiens OX=9606 GN=LARP4B PE=1 SV=1;tr|H0Y641|H0Y641_HUMAN La-related protein 4B (Fragment) OS=H	Homo sapiens	4	2	2	5.1	80.551	738	0	5.9058	5.1	2775700	2775700	0.00375832	0			598
P23246;H0Y9K7	Splicing factor, proline- and glutamine-rich	SFPQ	sp|P23246|SFPQ_HUMAN Splicing factor, proline- and glutamine-rich OS=Homo sapiens OX=9606 GN=SFPQ PE=1 SV=2;tr|H0Y9K7|H0Y9K7_HUMAN Splicing factor, proline- and glutamine-rich (Fragment) OS=Homo sapiens OX=9606 GN=SFPQ PE=1 SV=1	Homo sapiens	2	2	2	5.1	76.149	707	0	4.2942	5.1	2762200	2762200	0.00374004	3			400
P11047	Laminin subunit gamma-1	LAMC1	sp|P11047|LAMC1_HUMAN Laminin subunit gamma-1 OS=Homo sapiens OX=9606 GN=LAMC1 PE=1 SV=3	Homo sapiens	1	1	1	1.7	177.6	1609	0	17.293	1.7	2739000	2739000	0.00370863	3			370
H0YL43;Q14257	Reticulocalbin-2	RCN2	tr|H0YL43|H0YL43_HUMAN Reticulocalbin-2 (Fragment) OS=Homo sapiens OX=9606 GN=RCN2 PE=1 SV=1;sp|Q14257|RCN2_HUMAN Reticulocalbin-2 OS=Homo sapiens OX=9606 GN=RCN2 PE=1 SV=1	Homo sapiens	2	1	1	9.7	17.609	155	0	2.504	9.7	2719000	2719000	0.00368155	2			231
M0QXZ5;Q96B54	Zinc finger protein 428	ZNF428	tr|M0QXZ5|M0QXZ5_HUMAN Zinc finger protein 428 (Fragment) OS=Homo sapiens OX=9606 GN=ZNF428 PE=1 SV=1;sp|Q96B54|ZN428_HUMAN Zinc finger protein 428 OS=Homo sapiens OX=9606 GN=ZNF428 PE=1 SV=2	Homo sapiens	2	1	1	7.8	23.568	218	0	12.466	7.8	2697300	2697300	0.00365216	1			285
P20618	Proteasome subunit beta type-1	PSMB1	sp|P20618|PSB1_HUMAN Proteasome subunit beta type-1 OS=Homo sapiens OX=9606 GN=PSMB1 PE=1 SV=2	Homo sapiens	1	1	1	5.8	26.489	241	0.0016978	2.1666	5.8	2693400	2693400	0.00364688	1			396
O95602	DNA-directed RNA polymerase I subunit RPA1	POLR1A	sp|O95602|RPA1_HUMAN DNA-directed RNA polymerase I subunit RPA1 OS=Homo sapiens OX=9606 GN=POLR1A PE=1 SV=2	Homo sapiens	1	1	1	1.6	194.81	1720	0	6.0048	1.6	2683500	2683500	0.00363348	2			339
A0A5F9UP49;Q9BRK5	45 kDa calcium-binding protein	SDF4	tr|A0A5F9UP49|A0A5F9UP49_HUMAN 45 kDa calcium-binding protein OS=Homo sapiens OX=9606 GN=SDF4 PE=1 SV=1;sp|Q9BRK5|CAB45_HUMAN 45 kDa calcium-binding protein OS=Homo sapiens OX=9606 GN=SDF4 PE=1 SV=1	Homo sapiens	2	1	1	2.5	40.936	355	0	5.098	2.5	2667700	2667700	0.00361208	1			89
A0A087X2H1;Q9ULT8;A0A087WVU6;G3V4V5;H0YJD4;H0YJP0	E3 ubiquitin-protein ligase HECTD1	HECTD1	tr|A0A087X2H1|A0A087X2H1_HUMAN HECT-type E3 ubiquitin transferase OS=Homo sapiens OX=9606 GN=HECTD1 PE=1 SV=1;sp|Q9ULT8|HECD1_HUMAN E3 ubiquitin-protein ligase HECTD1 OS=Homo sapiens OX=9606 GN=HECTD1 PE=1 SV=3;tr|A0A087WVU6|A0A087WVU6_HUMAN E3 ubiquitin-p	Homo sapiens	6	2	2	1.2	289.63	2614	0	3.8365	1.2	2661600	2661600	0.00360383	2			32
Q96FX7	tRNA (adenine(58)-N(1))-methyltransferase catalytic subunit TRMT61A	TRMT61A	sp|Q96FX7|TRM61_HUMAN tRNA (adenine(58)-N(1))-methyltransferase catalytic subunit TRMT61A OS=Homo sapiens OX=9606 GN=TRMT61A PE=1 SV=1	Homo sapiens	1	1	1	7.3	31.381	289	0.0047319	1.7269	7.3	2647500	2647500	0.00358473	1			607
Q8WVT3	Trafficking protein particle complex subunit 12	TRAPPC12	sp|Q8WVT3|TPC12_HUMAN Trafficking protein particle complex subunit 12 OS=Homo sapiens OX=9606 GN=TRAPPC12 PE=1 SV=3	Homo sapiens	1	1	1	3.9	79.374	735	0	2.6841	3.9	2632100	2632100	0.00356388	2			594
C9JZN1;C9JIS1;C9JXA5;P62879	Guanine nucleotide-binding protein G(I)/G(S)/G(T) subunit beta-2	GNB2	tr|C9JZN1|C9JZN1_HUMAN Guanine nucleotide-binding protein G(I)/G(S)/G(T) subunit beta-2 (Fragment) OS=Homo sapiens OX=9606 GN=GNB2 PE=1 SV=1;tr|C9JIS1|C9JIS1_HUMAN Guanine nucleotide-binding protein G(I)/G(S)/G(T) subunit beta-2 (Fragment) OS=Homo sapiens	Homo sapiens	4	1	1	11.8	17.032	152	0.001626	1.8699	11.8	2632100	2632100	0.00356388	1			134
B1AKQ8;F6X3N5;F6UT28;P62873	Guanine nucleotide-binding protein G(I)/G(S)/G(T) subunit beta-1	GNB1	tr|B1AKQ8|B1AKQ8_HUMAN Guanine nucleotide-binding protein G(I)/G(S)/G(T) subunit beta-1 (Fragment) OS=Homo sapiens OX=9606 GN=GNB1 PE=1 SV=8;tr|F6X3N5|F6X3N5_HUMAN Guanine nucleotide-binding protein G(I)/G(S)/G(T) subunit beta-1 (Fragment) OS=Homo sapiens	Homo sapiens	4	1	1	16.8	12.198	107	0	22.982	16.8	2619700	2619700	0.00354709	4			106
Q9UN86	Ras GTPase-activating protein-binding protein 2	G3BP2	sp|Q9UN86|G3BP2_HUMAN Ras GTPase-activating protein-binding protein 2 OS=Homo sapiens OX=9606 GN=G3BP2 PE=1 SV=2	Homo sapiens	1	2	1	7.7	54.12	482	0.0091185	1.5248	7.7	2595500	2595500	0.00351433	1			645
O94906	Pre-mRNA-processing factor 6	PRPF6	sp|O94906|PRP6_HUMAN Pre-mRNA-processing factor 6 OS=Homo sapiens OX=9606 GN=PRPF6 PE=1 SV=1	Homo sapiens	1	1	1	1.8	106.92	941	0	18.763	1.8	2572700	2572700	0.00348345	1			333
H3BLV9;Q96SB4;D6RBF8	SRSF protein kinase 1	SRPK1	tr|H3BLV9|H3BLV9_HUMAN SRSF protein kinase 1 (Fragment) OS=Homo sapiens OX=9606 GN=SRPK1 PE=1 SV=1;sp|Q96SB4|SRPK1_HUMAN SRSF protein kinase 1 OS=Homo sapiens OX=9606 GN=SRPK1 PE=1 SV=2;tr|D6RBF8|D6RBF8_HUMAN SRSF protein kinase 1 (Fragment) OS=Homo sapien	Homo sapiens	3	2	2	4.5	76.039	671	0	9.7653	4.5	2562400	2562400	0.00346951	4			235
O95295	SNARE-associated protein Snapin	SNAPIN	sp|O95295|SNAPN_HUMAN SNARE-associated protein Snapin OS=Homo sapiens OX=9606 GN=SNAPIN PE=1 SV=1	Homo sapiens	1	2	2	24.3	14.874	136	0	28.68	24.3	2550100	2550100	0.00345285	4			335
P09234	U1 small nuclear ribonucleoprotein C	SNRPC	sp|P09234|RU1C_HUMAN U1 small nuclear ribonucleoprotein C OS=Homo sapiens OX=9606 GN=SNRPC PE=1 SV=1	Homo sapiens	1	1	1	12.6	17.394	159	0	31.904	12.6	2545000	2545000	0.00344595	2			361
P53618	Coatomer subunit beta	COPB1	sp|P53618|COPB_HUMAN Coatomer subunit beta OS=Homo sapiens OX=9606 GN=COPB1 PE=1 SV=3	Homo sapiens	1	1	1	1.9	107.14	953	0.001692	2.1148	1.9	2544300	2544300	0.003445	1			457
Q9ULX6	A-kinase anchor protein 8-like	AKAP8L	sp|Q9ULX6|AKP8L_HUMAN A-kinase anchor protein 8-like OS=Homo sapiens OX=9606 GN=AKAP8L PE=1 SV=4	Homo sapiens	1	1	1	2.5	71.639	646	0	3.1749	2.5	2529300	2529300	0.00342469	1			644
C9JXB8;C9JNW5;P83731	60S ribosomal protein L24	RPL24	tr|C9JXB8|C9JXB8_HUMAN 60S ribosomal protein L24 OS=Homo sapiens OX=9606 GN=RPL24 PE=1 SV=1;tr|C9JNW5|C9JNW5_HUMAN 60S ribosomal protein L24 OS=Homo sapiens OX=9606 GN=RPL24 PE=1 SV=1;sp|P83731|RL24_HUMAN 60S ribosomal protein L24 OS=Homo sapiens OX=9606 G	Homo sapiens	3	2	2	14	14.369	121	0	6.2052	14	2493100	2493100	0.00337568	3			137
C9JW69;P18754	Regulator of chromosome condensation	RCC1	tr|C9JW69|C9JW69_HUMAN Regulator of chromosome condensation (Fragment) OS=Homo sapiens OX=9606 GN=RCC1 PE=1 SV=1;sp|P18754|RCC1_HUMAN Regulator of chromosome condensation OS=Homo sapiens OX=9606 GN=RCC1 PE=1 SV=1	Homo sapiens	2	1	1	5.4	39.584	372	0	16.114	5.4	2418500	2418500	0.00327467	2			139
A0A087WVV1;P49721	Proteasome subunit beta type-2	PSMB2	tr|A0A087WVV1|A0A087WVV1_HUMAN Proteasome endopeptidase complex OS=Homo sapiens OX=9606 GN=PSMB2 PE=1 SV=1;sp|P49721|PSB2_HUMAN Proteasome subunit beta type-2 OS=Homo sapiens OX=9606 GN=PSMB2 PE=1 SV=1	Homo sapiens	2	1	1	13.1	9.557	84	0	6.8482	13.1	2406800	2406800	0.00325882	2			14
A0A2R8YFI2;A0A2R8YEA4;A0A2R8YE59;A0A2R8Y5H3;A0A2U3TZL3;A0A2R8Y7Q9;A0A2R8YEK8;A0A2R8YE18;A0A2R8Y5S9;A0A2R8Y7C5;Q9Y5P4	Collagen type IV alpha-3-binding protein	COL4A3BP	tr|A0A2R8YFI2|A0A2R8YFI2_HUMAN Ceramide transfer protein OS=Homo sapiens OX=9606 GN=CERT1 PE=1 SV=1;tr|A0A2R8YEA4|A0A2R8YEA4_HUMAN Ceramide transfer protein OS=Homo sapiens OX=9606 GN=CERT1 PE=1 SV=1;tr|A0A2R8YE59|A0A2R8YE59_HUMAN Ceramide transfer protein	Homo sapiens	11	1	1	4.8	35.381	311	0	43.534	4.8	2406700	2406700	0.00325869	2			71
H3BR35;P15170;Q8IYD1	Eukaryotic peptide chain release factor GTP-binding subunit ERF3A;Eukaryotic peptide chain release factor GTP-binding subunit ERF3B	GSPT1;GSPT2	tr|H3BR35|H3BR35_HUMAN Eukaryotic peptide chain release factor GTP-binding subunit ERF3A (Fragment) OS=Homo sapiens OX=9606 GN=GSPT1 PE=1 SV=1;sp|P15170|ERF3A_HUMAN Eukaryotic peptide chain release factor GTP-binding subunit ERF3A OS=Homo sapiens OX=9606 G	Homo sapiens	3	2	2	2.7	52.832	475	0	2.6814	2.7	2401100	2401100	0.00325111	2			239
A0A0U1RQQ1;Q5VZK9	Leucine-rich repeat-containing protein 16A	LRRC16A	tr|A0A0U1RQQ1|A0A0U1RQQ1_HUMAN F-actin-uncapping protein LRRC16A (Fragment) OS=Homo sapiens OX=9606 GN=CARMIL1 PE=1 SV=1;sp|Q5VZK9|CARL1_HUMAN F-actin-uncapping protein LRRC16A OS=Homo sapiens OX=9606 GN=CARMIL1 PE=1 SV=1	Homo sapiens	2	1	1	0.8	102.6	932	0.0047022	1.6554	0.8	2393800	2393800	0.00324122	1			60
K7EJF8;B7Z8D3;A0A087WTV2;K7ENH2;K7ESG5;K9J957;P61289	Proteasome activator complex subunit 3	PSME3	tr|K7EJF8|K7EJF8_HUMAN Proteasome activator complex subunit 3 OS=Homo sapiens OX=9606 GN=PSME3 PE=1 SV=1;tr|B7Z8D3|B7Z8D3_HUMAN Proteasome activator complex subunit 3 OS=Homo sapiens OX=9606 GN=PSME3 PE=1 SV=1;tr|A0A087WTV2|A0A087WTV2_HUMAN Proteasome acti	Homo sapiens	7	1	1	26.2	4.5581	42	0.0016639	2.0045	26.2	2379400	2379400	0.00322172	1			7
H3BM46;H3BRY1;H3BSI5;H3BMR4;A0A0C4DH01;Q9NVU0	DNA-directed RNA polymerase III subunit RPC5	POLR3E	tr|H3BM46|H3BM46_HUMAN DNA-directed RNA polymerase III subunit RPC5 (Fragment) OS=Homo sapiens OX=9606 GN=POLR3E PE=1 SV=1;tr|H3BRY1|H3BRY1_HUMAN DNA-directed RNA polymerase III subunit RPC5 (Fragment) OS=Homo sapiens OX=9606 GN=POLR3E PE=1 SV=1;tr|H3BSI5|	Homo sapiens	6	1	1	38.1	6.6864	63	0	4.0845	38.1	2359900	2359900	0.00319532	3			46
B8ZZ67;G2XKQ0;B8ZZN6;P63165	Small ubiquitin-related modifier;Small ubiquitin-related modifier 1	SUMO1	tr|B8ZZ67|B8ZZ67_HUMAN SMT3 suppressor of mif two 3 homolog 1 (Yeast), isoform CRA_b OS=Homo sapiens OX=9606 GN=SUMO1 PE=1 SV=1;sp|G2XKQ0|SUMO5_HUMAN Small ubiquitin-related modifier 5 OS=Homo sapiens OX=9606 GN=SUMO1P1 PE=1 SV=2;tr|B8ZZN6|B8ZZN6_HUMAN Sma	Homo sapiens	4	1	1	11.3	7.166	62	0.007728	1.5825	11.3	2339200	2339200	0.00316729	1			121
P18077;F8WBS5;F8WB72;C9K025	60S ribosomal protein L35a	RPL35A	sp|P18077|RL35A_HUMAN 60S ribosomal protein L35a OS=Homo sapiens OX=9606 GN=RPL35A PE=1 SV=2;tr|F8WBS5|F8WBS5_HUMAN 60S ribosomal protein L35a OS=Homo sapiens OX=9606 GN=RPL35A PE=1 SV=1;tr|F8WB72|F8WB72_HUMAN 60S ribosomal protein L35a OS=Homo sapiens OX=	Homo sapiens	4	2	2	16.4	12.538	110	0.0016949	2.1461	16.4	2337900	2337900	0.00316553	4			392
H7C2Y5;Q9UBS4	DnaJ homolog subfamily B member 11	DNAJB11	tr|H7C2Y5|H7C2Y5_HUMAN DnaJ_C domain-containing protein (Fragment) OS=Homo sapiens OX=9606 PE=1 SV=8;sp|Q9UBS4|DJB11_HUMAN DnaJ homolog subfamily B member 11 OS=Homo sapiens OX=9606 GN=DNAJB11 PE=1 SV=1	Homo sapiens	2	1	1	6.6	19.149	167	0	3.0026	6.6	2330600	2330600	0.00315565	1			242
E9PRZ9;E9PM92;O00193	Small acidic protein	C11orf58;SMAP	tr|E9PRZ9|E9PRZ9_HUMAN Chromosome 11 open reading frame 58 (Fragment) OS=Homo sapiens OX=9606 GN=C11orf58 PE=1 SV=1;tr|E9PM92|E9PM92_HUMAN Small acidic protein OS=Homo sapiens OX=9606 GN=C11orf58 PE=1 SV=2;sp|O00193|SMAP_HUMAN Small acidic protein OS=Homo	Homo sapiens	3	1	1	17.8	10.038	90	0	120.57	17.8	2326300	2326300	0.00314983	1			189
P40429;M0QZU1;A0A096LPE0;M0QYS1	60S ribosomal protein L13a	RPL13A	sp|P40429|RL13A_HUMAN 60S ribosomal protein L13a OS=Homo sapiens OX=9606 GN=RPL13A PE=1 SV=2;tr|M0QZU1|M0QZU1_HUMAN 60S ribosomal protein L13a OS=Homo sapiens OX=9606 GN=RPL13A PE=1 SV=1;tr|A0A096LPE0|A0A096LPE0_HUMAN 60S ribosomal protein L13a OS=Homo sap	Homo sapiens	4	2	2	14.3	23.577	203	0	6.3241	14.3	2311700	2311700	0.00313006	4			433
K7EJ19;K7EIU7;K7EQ35;O43776	Asparagine--tRNA ligase, cytoplasmic	NARS	tr|K7EJ19|K7EJ19_HUMAN Asparagine--tRNA ligase, cytoplasmic OS=Homo sapiens OX=9606 GN=NARS1 PE=1 SV=1;tr|K7EIU7|K7EIU7_HUMAN Asparagine--tRNA ligase, cytoplasmic (Fragment) OS=Homo sapiens OX=9606 GN=NARS1 PE=1 SV=1;tr|K7EQ35|K7EQ35_HUMAN Asparagine--tRNA	Homo sapiens	4	1	1	7.4	15.501	136	0.0016892	2.1104	7.4	2303000	2303000	0.00311828	1			256
C9JP16;O75718	Cartilage-associated protein	CRTAP	tr|C9JP16|C9JP16_HUMAN Cartilage-associated protein OS=Homo sapiens OX=9606 GN=CRTAP PE=1 SV=1;sp|O75718|CRTAP_HUMAN Cartilage-associated protein OS=Homo sapiens OX=9606 GN=CRTAP PE=1 SV=1	Homo sapiens	2	2	2	4.5	41.432	358	0	2.4328	4.5	2297400	2297400	0.0031107	2			138
Q92900	Regulator of nonsense transcripts 1	UPF1	sp|Q92900|RENT1_HUMAN Regulator of nonsense transcripts 1 OS=Homo sapiens OX=9606 GN=UPF1 PE=1 SV=2	Homo sapiens	1	2	2	3.1	124.34	1129	0	29.199	3.1	2293200	2293200	0.00310501	3			600
A0A6Q8PFD7;A0A6Q8PFD1;A0A6Q8PHK9;A6NMS2;B1ALA7;D3YTJ7;B1ALA9;A0A0B4J207;A0A2R8Y7H4;P60891;P21108;P11908	Ribose-phosphate pyrophosphokinase 1;Ribose-phosphate pyrophosphokinase 3;Ribose-phosphate pyrophosphokinase 2	PRPS2;PRPS1;PRPS1L1	tr|A0A6Q8PFD7|A0A6Q8PFD7_HUMAN Ribose-phosphate pyrophosphokinase 1 (Fragment) OS=Homo sapiens OX=9606 GN=PRPS1 PE=1 SV=1;tr|A0A6Q8PFD1|A0A6Q8PFD1_HUMAN Ribose-phosphate pyrophosphokinase 1 (Fragment) OS=Homo sapiens OX=9606 GN=PRPS1 PE=1 SV=1;tr|A0A6Q8PHK	Homo sapiens	12	1	1	14.1	9.2634	85	0.0016077	1.7988	14.1	2284700	2284700	0.0030935	3			41
Q9NZ53	Podocalyxin-like protein 2	PODXL2	sp|Q9NZ53|PDXL2_HUMAN Podocalyxin-like protein 2 OS=Homo sapiens OX=9606 GN=PODXL2 PE=1 SV=1	Homo sapiens	1	1	1	4	65.075	605	0	26.927	4	2283200	2283200	0.00309147	3			636
J3KS14;F5H478;J3KRU5;X6R3T8;J3QLH3;J3QQJ0;Q9UHR5	SAP30-binding protein	SAP30BP	tr|J3KS14|J3KS14_HUMAN SAP30-binding protein (Fragment) OS=Homo sapiens OX=9606 GN=SAP30BP PE=1 SV=1;tr|F5H478|F5H478_HUMAN SAP30-binding protein OS=Homo sapiens OX=9606 GN=SAP30BP PE=1 SV=1;tr|J3KRU5|J3KRU5_HUMAN SAP30 binding protein, isoform CRA_f OS=Ho	Homo sapiens	7	1	1	14.4	11.594	104	0	18.266	14.4	2281800	2281800	0.00308957	1			200
A0A1W2PS56;A0A1W2PRX1;A0A1W2PRU9;A0A1W2PP77;Q5SRN7;A0A140T975;A0A140T955;A0A140T941;A0A140T933;A0A140T8W8;A0A0G2JI36;A0A1W2PS24;A0A1W2PRZ0;A0A1W2PR61;A0A1W2PR11;A0A1W2PQS8;Q9GJ45;A0A1W2PS39;A0A1W2PQD0;A0A1W2PPQ2;A0A1W2PPF8;A0A140T937;A0A140T9Z6;A0A1W2PRT9;Q5SUL5;Q5SPM2;Q5RJ27;Q53Z42;B0UXQ0;A0A140T9I0;Q5RIP0;Q5QT33;O78179;O19617;A0A1W2PSE7;A0A140T962;A0A140T921;A0A0G2JIF0;Q5SRN5;A0A140T9X5;A0A140T…	Putative HLA class I histocompatibility antigen, alpha chain H;HLA class I histocompatibility antigen, A-3 alpha chain;HLA class I histocompatibility antigen, Cw-7 alpha chain	HLA-A;HLA-Cw;HLA-C;HLA-H	tr|A0A1W2PS56|A0A1W2PS56_HUMAN HLA class I histocompatibility antigen, C alpha chain OS=Homo sapiens OX=9606 GN=HLA-C PE=1 SV=1;tr|A0A1W2PRX1|A0A1W2PRX1_HUMAN HLA class I histocompatibility antigen, C alpha chain OS=Homo sapiens OX=9606 GN=HLA-C PE=1 SV=1;	Homo sapiens	57	1	1	9.8	26.87	244	0.0017637	2.4158	9.8	2266800	2266800	0.00306926	3			49
Q8TC07	TBC1 domain family member 15	TBC1D15	sp|Q8TC07|TBC15_HUMAN TBC1 domain family member 15 OS=Homo sapiens OX=9606 GN=TBC1D15 PE=1 SV=2	Homo sapiens	1	1	1	2.2	79.49	691	0.0015924	1.7657	2.2	2266000	2266000	0.00306818	1			590
F2Z2Q9;G5E9R5;D3YTI2;P24666	Low molecular weight phosphotyrosine protein phosphatase	ACP1	tr|F2Z2Q9|F2Z2Q9_HUMAN Low molecular weight phosphotyrosine protein phosphatase OS=Homo sapiens OX=9606 GN=ACP1 PE=1 SV=1;tr|G5E9R5|G5E9R5_HUMAN Acid phosphatase OS=Homo sapiens OX=9606 GN=ACP1 PE=1 SV=1;tr|D3YTI2|D3YTI2_HUMAN Acid phosphatase OS=Homo sapi	Homo sapiens	4	1	1	12.9	7.5005	70	0.0017668	2.4256	12.9	2263500	2263500	0.0030648	1			145
P84157	Matrix-remodeling-associated protein 7	MXRA7	sp|P84157|MXRA7_HUMAN Matrix-remodeling-associated protein 7 OS=Homo sapiens OX=9606 GN=MXRA7 PE=1 SV=1	Homo sapiens	1	1	1	14.2	21.466	204	0	11.489	14.2	2255700	2255700	0.00305423	3			499
P45973	Chromobox protein homolog 5	CBX5	sp|P45973|CBX5_HUMAN Chromobox protein homolog 5 OS=Homo sapiens OX=9606 GN=CBX5 PE=1 SV=1	Homo sapiens	1	1	1	6.8	22.225	191	0.0091463	1.534	6.8	2253700	2253700	0.00305153	1			440
K7EMT0;Q15428	Splicing factor 3A subunit 2	SF3A2	tr|K7EMT0|K7EMT0_HUMAN Splicing factor 3A subunit 2 (Fragment) OS=Homo sapiens OX=9606 GN=SF3A2 PE=1 SV=2;sp|Q15428|SF3A2_HUMAN Splicing factor 3A subunit 2 OS=Homo sapiens OX=9606 GN=SF3A2 PE=1 SV=2	Homo sapiens	2	1	1	14.1	15.224	135	0.0031696	1.7545	14.1	2231900	2231900	0.00302201	1			261
H0YK49;H0YL12;H0YNX6;H0YKF0;H0YLU7;P13804	Electron transfer flavoprotein subunit alpha, mitochondrial	ETFA	tr|H0YK49|H0YK49_HUMAN Electron transfer flavoprotein subunit alpha OS=Homo sapiens OX=9606 GN=ETFA PE=1 SV=1;tr|H0YL12|H0YL12_HUMAN Electron transfer flavoprotein subunit alpha, mitochondrial (Fragment) OS=Homo sapiens OX=9606 GN=ETFA PE=1 SV=8;tr|H0YNX6|	Homo sapiens	6	1	1	8.7	24.16	229	0.0016287	1.8785	8.7	2220000	2220000	0.0030059	1			229
Q8WXC6	Myeloma-overexpressed gene 2 protein	MYEOV2	sp|Q8WXC6|CSN9_HUMAN COP9 signalosome complex subunit 9 OS=Homo sapiens OX=9606 GN=COPS9 PE=1 SV=3	Homo sapiens	1	1	1	35.1	6.2107	57	0	2.4309	35.1	2212400	2212400	0.00299561	3			595
J3KT73;J3QL01;P63173;J3KSP2	60S ribosomal protein L38	RPL38	tr|J3KT73|J3KT73_HUMAN 60S ribosomal protein L38 OS=Homo sapiens OX=9606 GN=RPL38 PE=1 SV=1;tr|J3QL01|J3QL01_HUMAN 60S ribosomal protein L38 OS=Homo sapiens OX=9606 GN=RPL38 PE=1 SV=1;sp|P63173|RL38_HUMAN 60S ribosomal protein L38 OS=Homo sapiens OX=9606 G	Homo sapiens	4	3	3	34.4	7.5649	64	0	7.3622	34.4	2204200	2204200	0.0029845	4			253
A0A499FJN5;P22830	Ferrochelatase, mitochondrial	FECH	tr|A0A499FJN5|A0A499FJN5_HUMAN Ferrochelatase OS=Homo sapiens OX=9606 GN=FECH PE=1 SV=1;sp|P22830|HEMH_HUMAN Ferrochelatase, mitochondrial OS=Homo sapiens OX=9606 GN=FECH PE=1 SV=2	Homo sapiens	2	1	1	5.1	40.23	351	0.0017094	2.2028	5.1	2203300	2203300	0.00298328	1			87
Q15785	Mitochondrial import receptor subunit TOM34	TOMM34	sp|Q15785|TOM34_HUMAN Mitochondrial import receptor subunit TOM34 OS=Homo sapiens OX=9606 GN=TOMM34 PE=1 SV=2	Homo sapiens	1	1	1	4.2	34.559	309	0	27.508	4.2	2201000	2201000	0.00298017	2			556
M0R389;Q15102;M0QZT2	Platelet-activating factor acetylhydrolase IB subunit gamma	PAFAH1B3	tr|M0R389|M0R389_HUMAN Platelet-activating factor acetylhydrolase IB subunit alpha1 (Fragment) OS=Homo sapiens OX=9606 GN=PAFAH1B3 PE=1 SV=8;sp|Q15102|PA1B3_HUMAN Platelet-activating factor acetylhydrolase IB subunit alpha1 OS=Homo sapiens OX=9606 GN=PAFAH	Homo sapiens	3	2	2	19.5	18.356	164	0	16.195	19.5	2200300	2200300	0.00297922	2			292
Q8NB46	Serine/threonine-protein phosphatase 6 regulatory ankyrin repeat subunit C	ANKRD52	sp|Q8NB46|ANR52_HUMAN Serine/threonine-protein phosphatase 6 regulatory ankyrin repeat subunit C OS=Homo sapiens OX=9606 GN=ANKRD52 PE=1 SV=3	Homo sapiens	1	1	1	1.4	115.08	1076	0	2.462	1.4	2188800	2188800	0.00296365	1			588
Q6P2S0;Q659G3;E9PE20;P49458	Signal recognition particle 9 kDa protein	SRP9;DKFZp564M2223	tr|Q6P2S0|Q6P2S0_HUMAN Signal recognition particle 9 kDa protein OS=Homo sapiens OX=9606 GN=SRP9 PE=1 SV=1;tr|Q659G3|Q659G3_HUMAN Signal recognition particle 9 kDa protein OS=Homo sapiens OX=9606 GN=SRP9 PE=1 SV=1;tr|E9PE20|E9PE20_HUMAN Signal recognition	Homo sapiens	4	1	1	22.4	5.7685	49	0	6.9365	22.4	2187900	2187900	0.00296243	2			176
E9PL10;Q96K17	Transcription factor BTF3;Transcription factor BTF3 homolog 4	BTF3L4	tr|E9PL10|E9PL10_HUMAN Transcription factor BTF3 OS=Homo sapiens OX=9606 GN=BTF3L4 PE=1 SV=1;sp|Q96K17|BT3L4_HUMAN Transcription factor BTF3 homolog 4 OS=Homo sapiens OX=9606 GN=BTF3L4 PE=1 SV=1	Homo sapiens	2	1	1	4.8	15.779	145	0.0076923	1.5642	4.8	2124200	2124200	0.00287618	1			185
P40855;B7Z8B3;E9PPB4;Q5QNY5;H0YJ60	Peroxisomal biogenesis factor 19	PEX19	sp|P40855|PEX19_HUMAN Peroxisomal biogenesis factor 19 OS=Homo sapiens OX=9606 GN=PEX19 PE=1 SV=1;tr|B7Z8B3|B7Z8B3_HUMAN Peroxisomal biogenesis factor 19 OS=Homo sapiens OX=9606 GN=PEX19 PE=1 SV=1	Homo sapiens	5	3	3	15.7	32.806	299	0	31.763	15.7	2098100	2098100	0.00284084	4			434
A0A087WYC0;A0A6Q8KRG2;Q08379	Golgin subfamily A member 2	GOLGA2	tr|A0A087WYC0|A0A087WYC0_HUMAN Golgin subfamily A member 2 OS=Homo sapiens OX=9606 GN=GOLGA2 PE=1 SV=1;tr|A0A6Q8KRG2|A0A6Q8KRG2_HUMAN Golgin subfamily A member 2 OS=Homo sapiens OX=9606 GN=GOLGA2 PE=1 SV=1;sp|Q08379|GOGA2_HUMAN Golgin subfamily A member 2	Homo sapiens	3	2	2	9.1	31.894	286	0	2.6151	9.1	2057800	2057800	0.00278628	2			21
Q16531	DNA damage-binding protein 1	DDB1	sp|Q16531|DDB1_HUMAN DNA damage-binding protein 1 OS=Homo sapiens OX=9606 GN=DDB1 PE=1 SV=1	Homo sapiens	1	1	1	2.1	126.97	1140	0	3.3677	2.1	2057400	2057400	0.00278573	1			557
Q8N1G4	Leucine-rich repeat-containing protein 47	LRRC47	sp|Q8N1G4|LRC47_HUMAN Leucine-rich repeat-containing protein 47 OS=Homo sapiens OX=9606 GN=LRRC47 PE=1 SV=1	Homo sapiens	1	2	2	6	63.472	583	0	34.228	6	2056100	2056100	0.00278397	2			586
B1ANM7;Q9UNN5	FAS-associated factor 1	FAF1	tr|B1ANM7|B1ANM7_HUMAN FAS-associated factor 1 OS=Homo sapiens OX=9606 GN=FAF1 PE=1 SV=1;sp|Q9UNN5|FAF1_HUMAN FAS-associated factor 1 OS=Homo sapiens OX=9606 GN=FAF1 PE=1 SV=2	Homo sapiens	2	1	1	3.3	55.998	490	0	2.7962	3.3	2008500	2008500	0.00271952	2			107
Q86Y56	Dynein assembly factor 5, axonemal	DNAAF5	sp|Q86Y56|DAAF5_HUMAN Dynein assembly factor 5, axonemal OS=Homo sapiens OX=9606 GN=DNAAF5 PE=1 SV=4	Homo sapiens	1	2	2	4.8	93.52	855	0	3.6468	4.8	2008400	2008400	0.00271939	2			584
E7EN77;Q15021	Condensin complex subunit 1	NCAPD2	tr|E7EN77|E7EN77_HUMAN Condensin complex subunit 1 (Fragment) OS=Homo sapiens OX=9606 GN=NCAPD2 PE=1 SV=2;sp|Q15021|CND1_HUMAN Condensin complex subunit 1 OS=Homo sapiens OX=9606 GN=NCAPD2 PE=1 SV=3	Homo sapiens	2	2	2	4.2	102.65	919	0	20.589	4.2	1985900	1985900	0.00268892	2			162
F8WDY6;F8VVF2;H0YHM6;A0A0J9YWF7;A0A1B0GTY9;A0A1B0GUA1;A0A1B0GTG2;A0A1B0GW82;A0A1B0GW77;P49419	Alpha-aminoadipic semialdehyde dehydrogenase	ALDH7A1	tr|F8WDY6|F8WDY6_HUMAN Alpha-aminoadipic semialdehyde dehydrogenase OS=Homo sapiens OX=9606 GN=ALDH7A1 PE=1 SV=2;tr|F8VVF2|F8VVF2_HUMAN Alpha-aminoadipic semialdehyde dehydrogenase (Fragment) OS=Homo sapiens OX=9606 GN=ALDH7A1 PE=1 SV=2;tr|H0YHM6|H0YHM6_HU	Homo sapiens	10	1	1	12.5	15.3	136	0	27.454	12.5	1982900	1982900	0.00268486	2			54
C9J4Z3;P61513	60S ribosomal protein L37a	RPL37A	tr|C9J4Z3|C9J4Z3_HUMAN 60S ribosomal protein L37a OS=Homo sapiens OX=9606 GN=RPL37A PE=1 SV=1;sp|P61513|RL37A_HUMAN 60S ribosomal protein L37a OS=Homo sapiens OX=9606 GN=RPL37A PE=1 SV=2	Homo sapiens	2	1	1	26.5	7.624	68	0	10.311	26.5	1979200	1979200	0.00267985	2			127
A0A2R8Y815;A0A2R8Y6G0;A0A2R8Y804;A0A2R8Y543;A0A2R8Y5C3;A0A2R8Y750;A0A2R8Y5Z1;B4DGU4;A0A2R8YCH5;A0A2R8Y7Z0;A0A2R8Y5A3;P35222	Catenin beta-1	CTNNB1	tr|A0A2R8Y815|A0A2R8Y815_HUMAN Catenin beta-1 (Fragment) OS=Homo sapiens OX=9606 GN=CTNNB1 PE=1 SV=1;tr|A0A2R8Y6G0|A0A2R8Y6G0_HUMAN Catenin beta-1 (Fragment) OS=Homo sapiens OX=9606 GN=CTNNB1 PE=1 SV=1;tr|A0A2R8Y804|A0A2R8Y804_HUMAN Catenin beta-1 OS=Homo	Homo sapiens	12	2	2	9.1	20.395	186	0.0017544	2.3931	9.1	1861200	1861200	0.00252008	2			69
Q5VIR6	Vacuolar protein sorting-associated protein 53 homolog	VPS53	sp|Q5VIR6|VPS53_HUMAN Vacuolar protein sorting-associated protein 53 homolog OS=Homo sapiens OX=9606 GN=VPS53 PE=1 SV=2	Homo sapiens	1	1	1	3.5	94.404	832	0	3.6721	3.5	1825000	1825000	0.00247106	3			572
A0A3B3ITB8;B4E1E0;A0A3B3IRQ8;A0A3B3ITF6;A0A3B3IRI2;P17812	CTP synthase;CTP synthase 1	CTPS1	tr|A0A3B3ITB8|A0A3B3ITB8_HUMAN CTP synthase 1 OS=Homo sapiens OX=9606 GN=CTPS1 PE=1 SV=1;tr|B4E1E0|B4E1E0_HUMAN CTP synthase OS=Homo sapiens OX=9606 GN=CTPS1 PE=1 SV=1;tr|A0A3B3IRQ8|A0A3B3IRQ8_HUMAN CTP synthase OS=Homo sapiens OX=9606 GN=CTPS1 PE=1 SV=1;t	Homo sapiens	6	1	1	3.6	37.68	335	0	6.9871	3.6	1813800	1813800	0.0024559	2			78
Q92990	Glomulin	GLMN	sp|Q92990|GLMN_HUMAN Glomulin OS=Homo sapiens OX=9606 GN=GLMN PE=1 SV=2	Homo sapiens	1	1	1	1.9	68.207	594	0	2.9513	1.9	1796500	1796500	0.00243247	2			602
B3KXD6;B5MCF9;O00541	Pescadillo homolog	PES1	tr|B3KXD6|B3KXD6_HUMAN Pescadillo homolog OS=Homo sapiens OX=9606 GN=PES1 PE=1 SV=1;tr|B5MCF9|B5MCF9_HUMAN Pescadillo homolog OS=Homo sapiens OX=9606 GN=PES1 PE=1 SV=1;sp|O00541|PESC_HUMAN Pescadillo homolog OS=Homo sapiens OX=9606 GN=PES1 PE=1 SV=1	Homo sapiens	3	1	1	2.2	51.464	449	0	10.841	2.2	1770700	1770700	0.00239754	1			111
I3L2Z5;P56270;A0A087WWR2	Myc-associated zinc finger protein	MAZ	tr|I3L2Z5|I3L2Z5_HUMAN Myc-associated zinc finger protein (Fragment) OS=Homo sapiens OX=9606 GN=MAZ PE=1 SV=1;sp|P56270|MAZ_HUMAN Myc-associated zinc finger protein OS=Homo sapiens OX=9606 GN=MAZ PE=1 SV=1;tr|A0A087WWR2|A0A087WWR2_HUMAN Myc-associated zinc	Homo sapiens	3	2	2	17.8	22.187	202	0	4.6938	17.8	1768800	1768800	0.00239497	2			244
Q10713	Mitochondrial-processing peptidase subunit alpha	PMPCA	sp|Q10713|MPPA_HUMAN Mitochondrial-processing peptidase subunit alpha OS=Homo sapiens OX=9606 GN=PMPCA PE=1 SV=2	Homo sapiens	1	1	1	5.1	58.252	525	0	5.5895	5.1	1751100	1751100	0.002371	3			514
Q9Y3I0	tRNA-splicing ligase RtcB homolog	RTCB	sp|Q9Y3I0|RTCB_HUMAN RNA-splicing ligase RtcB homolog OS=Homo sapiens OX=9606 GN=RTCB PE=1 SV=1	Homo sapiens	1	1	1	2.8	55.21	505	0.0031746	1.7558	2.8	1729800	1729800	0.00234216	1			655
Q96EB6	NAD-dependent protein deacetylase sirtuin-1;SirtT1 75 kDa fragment	SIRT1	sp|Q96EB6|SIR1_HUMAN NAD-dependent protein deacetylase sirtuin-1 OS=Homo sapiens OX=9606 GN=SIRT1 PE=1 SV=2	Homo sapiens	1	1	1	1.6	81.68	747	0	21.914	1.6	1712200	1712200	0.00231833	1			606
C9J583;C9JZ53;F8WF30;C9JXE0;C9J875;C9JQT6;C9JZD8;E7ETV8;E7ESZ1;E7EWK4;E7EX05;E7EV12;E7EQT5;E7ETV3;O00410	Importin-5	IPO5	tr|C9J583|C9J583_HUMAN Importin-5 (Fragment) OS=Homo sapiens OX=9606 GN=IPO5 PE=1 SV=2;tr|C9JZ53|C9JZ53_HUMAN Importin-5 OS=Homo sapiens OX=9606 GN=IPO5 PE=1 SV=2;tr|F8WF30|F8WF30_HUMAN Importin-5 OS=Homo sapiens OX=9606 GN=IPO5 PE=1 SV=2;tr|C9JXE0|C9JXE0_	Homo sapiens	15	1	1	76.5	3.8122	34	0	5.2131	76.5	1701200	1701200	0.00230344	3			128
Q9UJX2	Cell division cycle protein 23 homolog	CDC23	sp|Q9UJX2|CDC23_HUMAN Cell division cycle protein 23 homolog OS=Homo sapiens OX=9606 GN=CDC23 PE=1 SV=3	Homo sapiens	1	1	1	4.9	68.833	597	0.0017391	2.3552	4.9	1676900	1676900	0.00227053	0			641
P42025	Beta-centractin	ACTR1B	sp|P42025|ACTY_HUMAN Beta-centractin OS=Homo sapiens OX=9606 GN=ACTR1B PE=1 SV=1	Homo sapiens	1	4	1	11.7	42.293	376	0.0016	1.789	11.7	1637600	1637600	0.00221732	2			436
A0A0J9YWL9			sp|A0A0J9YWL9|TX13C_HUMAN Putative testis-expressed protein 13C OS=Homo sapiens OX=9606 GN=TEX13C PE=5 SV=1	Homo sapiens	1	1	1	2.1	109.8	993	0	2.447	2.1	1631400	1631400	0.00220893	1			55
H7C3A1;Q9BXP5;H7C1K0;A0A0A0MSP6	Serrate RNA effector molecule homolog	SRRT	tr|H7C3A1|H7C3A1_HUMAN Arsenite-resistance protein 2 (Fragment) OS=Homo sapiens OX=9606 GN=SRRT PE=1 SV=1;sp|Q9BXP5|SRRT_HUMAN Serrate RNA effector molecule homolog OS=Homo sapiens OX=9606 GN=SRRT PE=1 SV=1;tr|H7C1K0|H7C1K0_HUMAN Serrate RNA effector molec	Homo sapiens	4	2	2	4.2	56.733	499	0	3.0071	4.2	1631000	1631000	0.00220839	2			243
E9PFW8;E7EMC7;Q13501	Sequestosome-1	SQSTM1	tr|E9PFW8|E9PFW8_HUMAN Sequestosome-1 (Fragment) OS=Homo sapiens OX=9606 GN=SQSTM1 PE=1 SV=1;tr|E7EMC7|E7EMC7_HUMAN Sequestosome-1 OS=Homo sapiens OX=9606 GN=SQSTM1 PE=1 SV=1;sp|Q13501|SQSTM_HUMAN Sequestosome-1 OS=Homo sapiens OX=9606 GN=SQSTM1 PE=1 SV=1	Homo sapiens	3	1	1	15.6	18.379	167	0.0016367	1.8967	15.6	1607100	1607100	0.00217602	1			160
P07196	Neurofilament light polypeptide	NEFL	sp|P07196|NFL_HUMAN Neurofilament light polypeptide OS=Homo sapiens OX=9606 GN=NEFL PE=1 SV=3	Homo sapiens	1	3	2	5.9	61.516	543	0.0016694	2.031	5.9	1603800	1603800	0.00217156	2			351
E7ES19;P35443	Thrombospondin-4	THBS4	tr|E7ES19|E7ES19_HUMAN Thrombospondin-4 OS=Homo sapiens OX=9606 GN=THBS4 PE=1 SV=1;sp|P35443|TSP4_HUMAN Thrombospondin-4 OS=Homo sapiens OX=9606 GN=THBS4 PE=1 SV=2	Homo sapiens	2	1	1	2.3	96.005	870	0.0016779	2.082	2.3	1601300	1601300	0.00216817	1			165
A0A087WY55;Q9NP79	Vacuolar protein sorting-associated protein VTA1 homolog	VTA1	tr|A0A087WY55|A0A087WY55_HUMAN Chromosome 6 open reading frame 55, isoform CRA_b OS=Homo sapiens OX=9606 GN=VTA1 PE=1 SV=1;sp|Q9NP79|VTA1_HUMAN Vacuolar protein sorting-associated protein VTA1 homolog OS=Homo sapiens OX=9606 GN=VTA1 PE=1 SV=1	Homo sapiens	2	1	1	5	31.102	280	0.0076805	1.5531	5	1589200	1589200	0.00215179	1			20
P31948	Stress-induced-phosphoprotein 1	STIP1	sp|P31948|STIP1_HUMAN Stress-induced-phosphoprotein 1 OS=Homo sapiens OX=9606 GN=STIP1 PE=1 SV=1	Homo sapiens	1	1	1	2.4	62.639	543	0.0062112	1.602	2.4	1587000	1587000	0.00214881	2			420
H0YEC5;H0YD77;H0YCH5;H0Y3P2;D3DQV9;P78344	Eukaryotic translation initiation factor 4 gamma 2	EIF4G2	tr|H0YEC5|H0YEC5_HUMAN Eukaryotic translation initiation factor 4 gamma 2 (Fragment) OS=Homo sapiens OX=9606 GN=EIF4G2 PE=1 SV=1;tr|H0YD77|H0YD77_HUMAN Eukaryotic translation initiation factor 4 gamma 2 (Fragment) OS=Homo sapiens OX=9606 GN=EIF4G2 PE=1 SV=	Homo sapiens	6	1	1	4.9	27.117	244	0	2.743	4.9	1573300	1573300	0.00213026	2			143
E9PKW4;P50226;P50225;E9PKR8;E9PM76;H3BRY5;A0A0A6YYL2;P0DMN0;P0DMM9	Sulfotransferase;Sulfotransferase 1A2;Sulfotransferase 1A1;Sulfotransferase 1A4;Sulfotransferase 1A3	SULT1A2;SULT1A1;SULT1A4;SULT1A3	tr|E9PKW4|E9PKW4_HUMAN Sulfotransferase OS=Homo sapiens OX=9606 GN=SULT1A2 PE=1 SV=1;sp|P50226|ST1A2_HUMAN Sulfotransferase 1A2 OS=Homo sapiens OX=9606 GN=SULT1A2 PE=1 SV=2;sp|P50225|ST1A1_HUMAN Sulfotransferase 1A1 OS=Homo sapiens OX=9606 GN=SULT1A1 PE=1	Homo sapiens	9	2	2	6.1	29.059	262	0	2.6778	6.1	1567300	1567300	0.00212214	2			184
Q6PD62	RNA polymerase-associated protein CTR9 homolog	CTR9	sp|Q6PD62|CTR9_HUMAN RNA polymerase-associated protein CTR9 homolog OS=Homo sapiens OX=9606 GN=CTR9 PE=1 SV=1	Homo sapiens	1	1	1	2.1	133.5	1173	0	7.556	2.1	1553100	1553100	0.00210291	1			575
Q9Y4E8	Ubiquitin carboxyl-terminal hydrolase 15	USP15	sp|Q9Y4E8|UBP15_HUMAN Ubiquitin carboxyl-terminal hydrolase 15 OS=Homo sapiens OX=9606 GN=USP15 PE=1 SV=3	Homo sapiens	1	2	2	2.5	112.42	981	0	15.755	2.5	1537500	1537500	0.00208179	2			657
J3KNQ3;Q9UNM6	26S proteasome non-ATPase regulatory subunit 13	PSMD13	tr|J3KNQ3|J3KNQ3_HUMAN 26S proteasome non-ATPase regulatory subunit 13 OS=Homo sapiens OX=9606 GN=PSMD13 PE=1 SV=1;sp|Q9UNM6|PSD13_HUMAN 26S proteasome non-ATPase regulatory subunit 13 OS=Homo sapiens OX=9606 GN=PSMD13 PE=1 SV=2	Homo sapiens	2	1	1	2.3	39.829	349	0.0016234	1.8681	2.3	1531200	1531200	0.00207326	1			250
V9GYD0;P36404	ADP-ribosylation factor-like protein 2	ARL2-SNX15;ARL2	tr|V9GYD0|V9GYD0_HUMAN ARL2-SNX15 readthrough (NMD candidate) OS=Homo sapiens OX=9606 GN=ARL2-SNX15 PE=3 SV=1;sp|P36404|ARL2_HUMAN ADP-ribosylation factor-like protein 2 OS=Homo sapiens OX=9606 GN=ARL2 PE=1 SV=4	Homo sapiens	2	1	1	7.1	13.176	113	0	3.3525	7.1	1528300	1528300	0.00206933	1			425
J3KMX5;P62277	40S ribosomal protein S13	RPS13	tr|J3KMX5|J3KMX5_HUMAN 40S ribosomal protein S13 OS=Homo sapiens OX=9606 GN=RPS13 PE=1 SV=1;sp|P62277|RS13_HUMAN 40S ribosomal protein S13 OS=Homo sapiens OX=9606 GN=RPS13 PE=1 SV=2	Homo sapiens	2	1	1	8.8	16.733	148	0	2.7059	8.8	1513700	1513700	0.00204956	2			248
Q92922	SWI/SNF complex subunit SMARCC1	SMARCC1	sp|Q92922|SMRC1_HUMAN SWI/SNF complex subunit SMARCC1 OS=Homo sapiens OX=9606 GN=SMARCC1 PE=1 SV=3	Homo sapiens	1	1	1	1.4	122.87	1105	0	12.005	1.4	1504200	1504200	0.0020367	2			601
Q7L2H7;E9PN86;J3KNJ2	Eukaryotic translation initiation factor 3 subunit M	EIF3M	sp|Q7L2H7|EIF3M_HUMAN Eukaryotic translation initiation factor 3 subunit M OS=Homo sapiens OX=9606 GN=EIF3M PE=1 SV=1;tr|E9PN86|E9PN86_HUMAN Eukaryotic translation initiation factor 3 subunit M (Fragment) OS=Homo sapiens OX=9606 GN=EIF3M PE=1 SV=1;tr|J3KNJ	Homo sapiens	3	2	2	5.3	42.502	374	0	7.0758	5.3	1495700	1495700	0.00202519	2			580
K7EMN2;K7EM49;K7EPF6;P52209	6-phosphogluconate dehydrogenase, decarboxylating	PGD	tr|K7EMN2|K7EMN2_HUMAN 6-phosphogluconate dehydrogenase, decarboxylating (Fragment) OS=Homo sapiens OX=9606 GN=PGD PE=1 SV=1;tr|K7EM49|K7EM49_HUMAN Phosphogluconate dehydrogenase (NADP(+)-dependent, decarboxylating) (Fragment) OS=Homo sapiens OX=9606 GN=PG	Homo sapiens	4	1	1	6.9	17.293	160	0	2.9253	6.9	1492500	1492500	0.00202086	2			260
O14654	Insulin receptor substrate 4	IRS4	sp|O14654|IRS4_HUMAN Insulin receptor substrate 4 OS=Homo sapiens OX=9606 GN=IRS4 PE=1 SV=1	Homo sapiens	1	1	1	1	133.77	1257	0.0017301	2.3193	1	1482600	1482600	0.00200745	1			302
F8WEF2;E9PGT6;Q99627	COP9 signalosome complex subunit 8	COPS8	tr|F8WEF2|F8WEF2_HUMAN COP9 signalosome complex subunit 8 OS=Homo sapiens OX=9606 GN=COPS8 PE=1 SV=1;tr|E9PGT6|E9PGT6_HUMAN COP9 signalosome complex subunit 8 OS=Homo sapiens OX=9606 GN=COPS8 PE=1 SV=1;sp|Q99627|CSN8_HUMAN COP9 signalosome complex subunit	Homo sapiens	3	1	1	21.9	7.2693	64	0	3.1718	21.9	1473900	1473900	0.00199567	2			177
M0R1U8;M0QYS5;F5H8D7;P18887	DNA repair protein XRCC1	XRCC1	tr|M0R1U8|M0R1U8_HUMAN DNA repair protein XRCC1 (Fragment) OS=Homo sapiens OX=9606 GN=XRCC1 PE=1 SV=1;tr|M0QYS5|M0QYS5_HUMAN DNA repair protein XRCC1 (Fragment) OS=Homo sapiens OX=9606 GN=XRCC1 PE=1 SV=1;tr|F5H8D7|F5H8D7_HUMAN DNA repair protein XRCC1 OS=H	Homo sapiens	4	1	1	17.1	22.246	210	0	10.689	17.1	1439400	1439400	0.00194896	2			202
F5H7V9;E9PC84;J3QSU6;P24821;F5H5D6	Tenascin	TNC	tr|F5H7V9|F5H7V9_HUMAN Tenascin OS=Homo sapiens OX=9606 GN=TNC PE=1 SV=1;tr|E9PC84|E9PC84_HUMAN Tenascin OS=Homo sapiens OX=9606 GN=TNC PE=1 SV=1;tr|J3QSU6|J3QSU6_HUMAN Tenascin OS=Homo sapiens OX=9606 GN=TNC PE=1 SV=1;sp|P24821|TENA_HUMAN Tenascin OS=Homo	Homo sapiens	5	2	2	1.6	201.14	1838	0	16.942	1.6	1434300	1434300	0.00194205	3			173
M0R061;M0QXB4;O14579	Coatomer subunit epsilon	COPE	tr|M0R061|M0R061_HUMAN Coatomer subunit epsilon OS=Homo sapiens OX=9606 GN=COPE PE=1 SV=1;tr|M0QXB4|M0QXB4_HUMAN Coatomer subunit epsilon OS=Homo sapiens OX=9606 GN=COPE PE=1 SV=1;sp|O14579|COPE_HUMAN Coatomer subunit epsilon OS=Homo sapiens OX=9606 GN=COP	Homo sapiens	3	2	2	28.8	16.453	146	0	3.8875	28.8	1427800	1427800	0.00193325	2			284
M0R3C3;Q9NZ01	Very-long-chain enoyl-CoA reductase	TECR	tr|M0R3C3|M0R3C3_HUMAN Very-long-chain enoyl-CoA reductase OS=Homo sapiens OX=9606 GN=TECR PE=1 SV=1;sp|Q9NZ01|TECR_HUMAN Very-long-chain enoyl-CoA reductase OS=Homo sapiens OX=9606 GN=TECR PE=1 SV=1	Homo sapiens	2	1	1	11.4	11.773	105	0.001634	1.8891	11.4	1409900	1409900	0.00190901	3			293
F5H1H2;F5H2E6;A0A0C4DGG8;Q8IX12;F5H3E1	Cell division cycle and apoptosis regulator protein 1	CCAR1	tr|F5H1H2|F5H1H2_HUMAN Cell division cycle and apoptosis regulator protein 1 (Fragment) OS=Homo sapiens OX=9606 GN=CCAR1 PE=1 SV=1;tr|F5H2E6|F5H2E6_HUMAN Cell division cycle and apoptosis regulator protein 1 (Fragment) OS=Homo sapiens OX=9606 GN=CCAR1 PE=1	Homo sapiens	5	3	3	5.3	75.724	646	0	4.6551	5.3	1403100	1403100	0.00189981	3			43
G5E9A6	Ubiquitin carboxyl-terminal hydrolase	USP11	tr|G5E9A6|G5E9A6_HUMAN Ubiquitin carboxyl-terminal hydrolase OS=Homo sapiens OX=9606 GN=USP11 PE=1 SV=1	Homo sapiens	1	1	1	2.6	105.03	920	0.0017065	2.1991	2.6	1360400	1360400	0.00184199	1			221
O75564	Jerky protein homolog	JRK	sp|O75564|JERKY_HUMAN Jerky protein homolog OS=Homo sapiens OX=9606 GN=JRK PE=1 SV=3	Homo sapiens	1	1	1	4.3	61.815	556	0.0017271	2.2631	4.3	1355700	1355700	0.00183563	1			323
Q15691	Microtubule-associated protein RP/EB family member 1	MAPRE1	sp|Q15691|MARE1_HUMAN Microtubule-associated protein RP/EB family member 1 OS=Homo sapiens OX=9606 GN=MAPRE1 PE=1 SV=3	Homo sapiens	1	1	1	7.5	29.999	268	0.004717	1.6747	7.5	1346600	1346600	0.00182331	1			554
F8WBH4;C9JZT2;P19525	Interferon-induced, double-stranded RNA-activated protein kinase	EIF2AK2	tr|F8WBH4|F8WBH4_HUMAN Interferon-induced, double-stranded RNA-activated protein kinase (Fragment) OS=Homo sapiens OX=9606 GN=EIF2AK2 PE=1 SV=1;tr|C9JZT2|C9JZT2_HUMAN Interferon-induced, double-stranded RNA-activated protein kinase (Fragment) OS=Homo sapie	Homo sapiens	3	1	1	7.8	11.305	102	0.0017036	2.1979	7.8	1324100	1324100	0.00179284	1			140
P56192;H0YIC2;H0YHV5	Methionine--tRNA ligase, cytoplasmic	MARS	sp|P56192|SYMC_HUMAN Methionine--tRNA ligase, cytoplasmic OS=Homo sapiens OX=9606 GN=MARS1 PE=1 SV=2	Homo sapiens	3	3	3	5.4	101.11	900	0	12.059	5.4	1295000	1295000	0.00175344	3			465
E9PLT0;O75534	Cold shock domain-containing protein E1	CSDE1	tr|E9PLT0|E9PLT0_HUMAN Cold shock domain-containing protein E1 OS=Homo sapiens OX=9606 GN=CSDE1 PE=1 SV=1;sp|O75534|CSDE1_HUMAN Cold shock domain-containing protein E1 OS=Homo sapiens OX=9606 GN=CSDE1 PE=1 SV=2	Homo sapiens	2	1	1	1.8	74.583	668	0.0062208	1.6103	1.8	1265900	1265900	0.00171404	1			187
O60216	Double-strand-break repair protein rad21 homolog	RAD21	sp|O60216|RAD21_HUMAN Double-strand-break repair protein rad21 homolog OS=Homo sapiens OX=9606 GN=RAD21 PE=1 SV=2	Homo sapiens	1	1	1	2.1	71.689	631	0.0091324	1.5335	2.1	1265700	1265700	0.00171377	2			316
Q92572	AP-3 complex subunit sigma-1	AP3S1	sp|Q92572|AP3S1_HUMAN AP-3 complex subunit sigma-1 OS=Homo sapiens OX=9606 GN=AP3S1 PE=1 SV=1	Homo sapiens	1	1	1	4.7	21.732	193	0.0016155	1.8157	4.7	1234200	1234200	0.00167112	1			597
O43681	ATPase ASNA1	ASNA1	sp|O43681|GET3_HUMAN ATPase GET3 OS=Homo sapiens OX=9606 GN=GET3 PE=1 SV=2	Homo sapiens	1	2	2	5.5	38.792	348	0	2.8981	5.5	1229000	1229000	0.00166407	2			311
P62081	40S ribosomal protein S7	RPS7	sp|P62081|RS7_HUMAN 40S ribosomal protein S7 OS=Homo sapiens OX=9606 GN=RPS7 PE=1 SV=1	Homo sapiens	1	1	1	5.7	22.127	194	0	5.8496	5.7	1212200	1212200	0.00164133	1			474
A0A087WUT6;O60841	Eukaryotic translation initiation factor 5B	EIF5B	tr|A0A087WUT6|A0A087WUT6_HUMAN Eukaryotic translation initiation factor 5B OS=Homo sapiens OX=9606 GN=EIF5B PE=1 SV=1;sp|O60841|IF2P_HUMAN Eukaryotic translation initiation factor 5B OS=Homo sapiens OX=9606 GN=EIF5B PE=1 SV=4	Homo sapiens	2	2	2	1.5	138.68	1220	0	8.4912	1.5	1210800	1210800	0.00163943	3			11
A0A0U1RR30;A0A0U1RRM1;Q8WXI9	Transcriptional repressor p66-beta	GATAD2B	tr|A0A0U1RR30|A0A0U1RR30_HUMAN Transcriptional repressor p66-beta (Fragment) OS=Homo sapiens OX=9606 GN=GATAD2B PE=1 SV=1;tr|A0A0U1RRM1|A0A0U1RRM1_HUMAN Transcriptional repressor p66-beta OS=Homo sapiens OX=9606 GN=GATAD2B PE=1 SV=1;sp|Q8WXI9|P66B_HUMAN Tr	Homo sapiens	3	1	1	7.6	28.673	263	0	11.74	7.6	1192400	1192400	0.00161452	2			61
P62266	40S ribosomal protein S23	RPS23	sp|P62266|RS23_HUMAN 40S ribosomal protein S23 OS=Homo sapiens OX=9606 GN=RPS23 PE=1 SV=3	Homo sapiens	1	1	1	7.7	15.807	143	0	10.36	7.7	1146800	1146800	0.00155278	2			479
Q14315	Filamin-C	FLNC	sp|Q14315|FLNC_HUMAN Filamin-C OS=Homo sapiens OX=9606 GN=FLNC PE=1 SV=3	Homo sapiens	1	3	1	1.3	291.02	2725	0.0062305	1.6124	1.3	1088300	1088300	0.00147357	1			535
Q96I24	Far upstream element-binding protein 3	FUBP3	sp|Q96I24|FUBP3_HUMAN Far upstream element-binding protein 3 OS=Homo sapiens OX=9606 GN=FUBP3 PE=1 SV=2	Homo sapiens	1	2	1	3.7	61.64	572	0	10.544	3.7	1084900	1084900	0.00146896	2			608
C9JJ68;B4DM58;Q86XF0;P00374	Dihydrofolate reductase, mitochondrial;Dihydrofolate reductase	DHFRL1;DHFR	tr|C9JJ68|C9JJ68_HUMAN Dihydrofolate reductase (Fragment) OS=Homo sapiens OX=9606 GN=DHFR2 PE=1 SV=1;tr|B4DM58|B4DM58_HUMAN Dihydrofolate reductase OS=Homo sapiens OX=9606 GN=DHFR PE=1 SV=1;sp|Q86XF0|DYR2_HUMAN Dihydrofolate reductase 2, mitochondrial OS=H	Homo sapiens	4	1	1	6.1	13.151	114	0.0046875	1.622	6.1	1078400	1078400	0.00146016	1			115
H0Y8B5;H7BYR4;F8W8P5;C9IYE1;A0A087X1P3;Q86UW7	Calcium-dependent secretion activator 2	CADPS2	tr|H0Y8B5|H0Y8B5_HUMAN Calcium-dependent secretion activator 2 (Fragment) OS=Homo sapiens OX=9606 GN=CADPS2 PE=1 SV=1;tr|H7BYR4|H7BYR4_HUMAN Calcium-dependent secretion activator 2 (Fragment) OS=Homo sapiens OX=9606 GN=CADPS2 PE=1 SV=1;tr|F8W8P5|F8W8P5_HUM	Homo sapiens	6	1	1	1.4	56.056	490	0.0016556	1.9783	1.4	1058500	1058500	0.00143322	0			30
Q10570	Cleavage and polyadenylation specificity factor subunit 1	CPSF1	sp|Q10570|CPSF1_HUMAN Cleavage and polyadenylation specificity factor subunit 1 OS=Homo sapiens OX=9606 GN=CPSF1 PE=1 SV=2	Homo sapiens	1	1	1	1.2	160.88	1443	0	27.508	1.2	1022500	1022500	0.00138447	1			513
O75934	Pre-mRNA-splicing factor SPF27	BCAS2	sp|O75934|SPF27_HUMAN Pre-mRNA-splicing factor SPF27 OS=Homo sapiens OX=9606 GN=BCAS2 PE=1 SV=1	Homo sapiens	1	1	1	12.4	26.131	225	0	17.47	12.4	1016500	1016500	0.00137635	5			330
Q9NSD9	Phenylalanine--tRNA ligase beta subunit	FARSB	sp|Q9NSD9|SYFB_HUMAN Phenylalanine--tRNA ligase beta subunit OS=Homo sapiens OX=9606 GN=FARSB PE=1 SV=3	Homo sapiens	1	2	2	3.4	66.115	589	0	2.6893	3.4	1009800	1009800	0.00136728	2			634
Q96A49	Synapse-associated protein 1	SYAP1	sp|Q96A49|SYAP1_HUMAN Synapse-associated protein 1 OS=Homo sapiens OX=9606 GN=SYAP1 PE=1 SV=1	Homo sapiens	1	2	2	8.8	39.933	352	0	17.119	8.8	975560	975560	0.00132092	1			604
B9A062;P13995	Bifunctional methylenetetrahydrofolate dehydrogenase/cyclohydrolase, mitochondrial;NAD-dependent methylenetetrahydrofolate dehydrogenase;Methenyltetrahydrofolate cyclohydrolase	MTHFD2	tr|B9A062|B9A062_HUMAN Bifunctional methylenetetrahydrofolate dehydrogenase/cyclohydrolase, mitochondrial OS=Homo sapiens OX=9606 GN=MTHFD2 PE=1 SV=1;sp|P13995|MTDC_HUMAN Bifunctional methylenetetrahydrofolate dehydrogenase/cyclohydrolase, mitochondrial OS	Homo sapiens	2	1	1	5	23.867	222	0	4.6622	5	957860	957860	0.00129695	1			123
X6RA30;O75794	Cell division cycle protein 123 homolog	CDC123	tr|X6RA30|X6RA30_HUMAN Cell division cycle protein 123 homolog OS=Homo sapiens OX=9606 GN=CDC123 PE=1 SV=1;sp|O75794|CD123_HUMAN Cell division cycle protein 123 homolog OS=Homo sapiens OX=9606 GN=CDC123 PE=1 SV=1	Homo sapiens	2	1	1	6.4	33.891	295	0.0017361	2.3426	6.4	955210	955210	0.00129336	1			327
Q9H2G2	STE20-like serine/threonine-protein kinase	SLK	sp|Q9H2G2|SLK_HUMAN STE20-like serine/threonine-protein kinase OS=Homo sapiens OX=9606 GN=SLK PE=1 SV=1	Homo sapiens	1	1	1	1.1	142.69	1235	0.0047096	1.6706	1.1	891900	891900	0.00120764	1			626
Q92616	Translational activator GCN1	GCN1L1	sp|Q92616|GCN1_HUMAN eIF-2-alpha kinase activator GCN1 OS=Homo sapiens OX=9606 GN=GCN1 PE=1 SV=6	Homo sapiens	1	1	1	0.4	292.75	2671	0.0016026	1.7922	0.4	891370	891370	0.00120692	1			599
M0R1Q0;M0R1S6;M0R2Q6;M0R2K9;Q14318	Peptidyl-prolyl cis-trans isomerase;Peptidyl-prolyl cis-trans isomerase FKBP8	FKBP8	tr|M0R1Q0|M0R1Q0_HUMAN Peptidylprolyl isomerase (Fragment) OS=Homo sapiens OX=9606 GN=FKBP8 PE=1 SV=1;tr|M0R1S6|M0R1S6_HUMAN Peptidylprolyl isomerase (Fragment) OS=Homo sapiens OX=9606 GN=FKBP8 PE=1 SV=8;tr|M0R2Q6|M0R2Q6_HUMAN Peptidylprolyl isomerase (Fra	Homo sapiens	5	1	1	17.8	17.442	163	0.0016181	1.846	17.8	823100	823100	0.00111448	1			290
H7C3I1;F6VDH7;Q3KNR6;Q8IZP2;Q8NFI4;P50502	Putative protein FAM10A4;Putative protein FAM10A5;Hsc70-interacting protein	ST13;ST13P4;ST13P5	tr|H7C3I1|H7C3I1_HUMAN Hsc70-interacting protein (Fragment) OS=Homo sapiens OX=9606 GN=ST13 PE=1 SV=1;tr|F6VDH7|F6VDH7_HUMAN Hsc70-interacting protein (Fragment) OS=Homo sapiens OX=9606 GN=ST13 PE=1 SV=1;tr|Q3KNR6|Q3KNR6_HUMAN Hsc70-interacting protein OS=	Homo sapiens	6	1	1	4.8	16.219	146	0.0091047	1.5222	4.8	730560	730560	0.000989183	1			204
Q99436	Proteasome subunit beta type-7	PSMB7	sp|Q99436|PSB7_HUMAN Proteasome subunit beta type-7 OS=Homo sapiens OX=9606 GN=PSMB7 PE=1 SV=1	Homo sapiens	1	1	1	10.1	29.965	277	0	3.1885	10.1	730010	730010	0.000988439	1			613
Q9UL42	Paraneoplastic antigen Ma2	PNMA2	sp|Q9UL42|PNMA2_HUMAN Paraneoplastic antigen Ma2 OS=Homo sapiens OX=9606 GN=PNMA2 PE=1 SV=2	Homo sapiens	1	2	2	7.1	41.509	364	0	7.5617	7.1	621160	621160	0.000841055	2			643
E9PKV2;Q9NRX2	39S ribosomal protein L17, mitochondrial	MRPL17	tr|E9PKV2|E9PKV2_HUMAN 39S ribosomal protein L17, mitochondrial (Fragment) OS=Homo sapiens OX=9606 GN=MRPL17 PE=1 SV=1;sp|Q9NRX2|RM17_HUMAN 39S ribosomal protein L17, mitochondrial OS=Homo sapiens OX=9606 GN=MRPL17 PE=1 SV=1	Homo sapiens	2	1	1	5.6	16.371	142	0.0031797	1.7624	5.6	533430	533430	0.000722268	1			183
A0A0U1RQC3;F2Z2V6;A0A0U1RQM8;A0A0U1RQU2;A0A0U1RRI9;A0A0U1RQE9;C9J165;A0A0U1RQT0;P47897	Glutamine--tRNA ligase	QARS	tr|A0A0U1RQC3|A0A0U1RQC3_HUMAN Glutamine--tRNA ligase OS=Homo sapiens OX=9606 GN=QARS1 PE=1 SV=1;tr|F2Z2V6|F2Z2V6_HUMAN Glutamine--tRNA ligase OS=Homo sapiens OX=9606 GN=QARS1 PE=1 SV=1;tr|A0A0U1RQM8|A0A0U1RQM8_HUMAN Glutamine--tRNA ligase (Fragment) OS=Ho	Homo sapiens	9	1	1	26.9	7.1251	67	0	2.7603	26.9	532750	532750	0.000721347	1			58
H7BY91;H0Y3V9;H0Y5B4;H7BZ11;J3KQN4;Q969Q0;P83881	60S ribosomal protein L36a-like;60S ribosomal protein L36a	RPL36A;RPL36A-HNRNPH2;RPL36AL	tr|H7BY91|H7BY91_HUMAN 60S ribosomal protein L36a OS=Homo sapiens OX=9606 GN=RPL36A PE=3 SV=2;tr|H0Y3V9|H0Y3V9_HUMAN RPL36A-HNRNPH2 readthrough OS=Homo sapiens OX=9606 GN=RPL36A-HNRNPH2 PE=3 SV=2;tr|H0Y5B4|H0Y5B4_HUMAN 60S ribosomal protein L36a OS=Homo sa	Homo sapiens	7	1	1	18.6	8.2436	70	0.007716	1.5786	18.6	329200	329200	0.000445739	1			223
O95373	Importin-7	IPO7	sp|O95373|IPO7_HUMAN Importin-7 OS=Homo sapiens OX=9606 GN=IPO7 PE=1 SV=1	Homo sapiens	1	1	1	1.9	119.52	1038	0	2.4992	1.9	0	0	0	1			337
P55001	Microfibrillar-associated protein 2	MFAP2	sp|P55001|MFAP2_HUMAN Microfibrillar-associated protein 2 OS=Homo sapiens OX=9606 GN=MFAP2 PE=1 SV=1	Homo sapiens	1	1	1	10.4	20.825	183	0	9.0884	10.4	0	0	0	1			459
Q01581	Hydroxymethylglutaryl-CoA synthase, cytoplasmic	HMGCS1	sp|Q01581|HMCS1_HUMAN Hydroxymethylglutaryl-CoA synthase, cytoplasmic OS=Homo sapiens OX=9606 GN=HMGCS1 PE=1 SV=2	Homo sapiens	1	1	1	3.5	57.293	520	0.0017483	2.3773	3.5	0	0	0	1			502
Q14676	Mediator of DNA damage checkpoint protein 1	MDC1	sp|Q14676|MDC1_HUMAN Mediator of DNA damage checkpoint protein 1 OS=Homo sapiens OX=9606 GN=MDC1 PE=1 SV=3	Homo sapiens	1	2	2	1.4	226.66	2089	0	5.9264	1.4	0	0	0	2			538
Q6IN85	Serine/threonine-protein phosphatase 4 regulatory subunit 3A	SMEK1	sp|Q6IN85|P4R3A_HUMAN Serine/threonine-protein phosphatase 4 regulatory subunit 3A OS=Homo sapiens OX=9606 GN=PPP4R3A PE=1 SV=1	Homo sapiens	1	1	1	4	95.367	833	0	4.7714	4	0	0	0	1			573
Q6QNY1	Biogenesis of lysosome-related organelles complex 1 subunit 2	BLOC1S2	sp|Q6QNY1|BL1S2_HUMAN Biogenesis of lysosome-related organelles complex 1 subunit 2 OS=Homo sapiens OX=9606 GN=BLOC1S2 PE=1 SV=1	Homo sapiens	1	1	1	8.5	15.961	142	0.0016502	1.9357	8.5	0	0	0	1			576
Q96BD8	Spindle and kinetochore-associated protein 1	SKA1	sp|Q96BD8|SKA1_HUMAN Spindle and kinetochore-associated protein 1 OS=Homo sapiens OX=9606 GN=SKA1 PE=1 SV=1	Homo sapiens	1	1	1	5.9	29.484	255	0	5.8864	5.9	0	0	0	1			605
Q96ST2	Protein IWS1 homolog	IWS1	sp|Q96ST2|IWS1_HUMAN Protein IWS1 homolog OS=Homo sapiens OX=9606 GN=IWS1 PE=1 SV=2	Homo sapiens	1	1	1	2.6	91.954	819	0	2.4346	2.6	0	0	0	1			612
Q99459	Cell division cycle 5-like protein	CDC5L	sp|Q99459|CDC5L_HUMAN Cell division cycle 5-like protein OS=Homo sapiens OX=9606 GN=CDC5L PE=1 SV=2	Homo sapiens	1	2	2	3	92.25	802	0	3.3199	3	0	0	0	2			614
Q9NS69	Mitochondrial import receptor subunit TOM22 homolog	TOMM22	sp|Q9NS69|TOM22_HUMAN Mitochondrial import receptor subunit TOM22 homolog OS=Homo sapiens OX=9606 GN=TOMM22 PE=1 SV=3	Homo sapiens	1	1	1	14.8	15.521	142	0.0015974	1.7754	14.8	0	0	0	1			633
Q9UNS1	Protein timeless homolog	TIMELESS	sp|Q9UNS1|TIM_HUMAN Protein timeless homolog OS=Homo sapiens OX=9606 GN=TIMELESS PE=1 SV=2	Homo sapiens	1	1	1	0.9	138.66	1208	0.0062016	1.595	0.9	0	0	0	1			647
A0A087WTT6;P62273	40S ribosomal protein S29	RPS29	tr|A0A087WTT6|A0A087WTT6_HUMAN 40S ribosomal protein S29 OS=Homo sapiens OX=9606 GN=RPS29 PE=1 SV=1;sp|P62273|RS29_HUMAN 40S ribosomal protein S29 OS=Homo sapiens OX=9606 GN=RPS29 PE=1 SV=2	Homo sapiens	2	1	1	15.1	6.1152	53	0	4.3696	15.1	0	0	0	1			6
A0A087WVR3;A0A087WTW0;Q96T88;A0A087WWG9	E3 ubiquitin-protein ligase UHRF1	UHRF1	tr|A0A087WVR3|A0A087WVR3_HUMAN RING-type E3 ubiquitin transferase OS=Homo sapiens OX=9606 GN=UHRF1 PE=1 SV=1;tr|A0A087WTW0|A0A087WTW0_HUMAN RING-type E3 ubiquitin transferase OS=Homo sapiens OX=9606 GN=UHRF1 PE=1 SV=1;sp|Q96T88|UHRF1_HUMAN E3 ubiquitin-pro	Homo sapiens	4	2	2	2.1	91.099	806	0.0016051	1.7953	2.1	0	0	0	2			8
A0A087WVZ9;A0A0A0MQR7;P19388	DNA-directed RNA polymerases I, II, and III subunit RPABC1	POLR2E	tr|A0A087WVZ9|A0A087WVZ9_HUMAN DNA-directed RNA polymerase II subunit E OS=Homo sapiens OX=9606 GN=POLR2E PE=1 SV=1;tr|A0A0A0MQR7|A0A0A0MQR7_HUMAN DNA-directed RNA polymerase II subunit E OS=Homo sapiens OX=9606 GN=POLR2E PE=1 SV=1;sp|P19388|RPAB1_HUMAN DN	Homo sapiens	3	2	2	23.9	21.459	184	0.0091603	1.5363	23.9	0	0	0	2			15
A0A087WW69;F8W8L6;A0A087WTA5;E7ERK9;Q9UI10;H7C2L8	Translation initiation factor eIF-2B subunit delta	EIF2B4	tr|A0A087WW69|A0A087WW69_HUMAN Translation initiation factor eIF-2B subunit delta OS=Homo sapiens OX=9606 GN=EIF2B4 PE=1 SV=1;tr|F8W8L6|F8W8L6_HUMAN Eukaryotic translation initiation factor 2B subunit 4 delta transcript variant 4 OS=Homo sapiens OX=9606 GN	Homo sapiens	6	2	2	11	25.111	228	0.0016667	2.0132	11	0	0	0	2			3
A0A0J9YWJ4;K7EJD2;A0A0J9YWB6;Q9Y5B0;K7EPW4;A0A0A0MR03	RNA polymerase II subunit A C-terminal domain phosphatase	CTDP1	tr|A0A0J9YWJ4|A0A0J9YWJ4_HUMAN RNA polymerase II subunit A C-terminal domain phosphatase (Fragment) OS=Homo sapiens OX=9606 GN=CTDP1 PE=1 SV=1;tr|K7EJD2|K7EJD2_HUMAN RNA polymerase II subunit A C-terminal domain phosphatase (Fragment) OS=Homo sapiens OX=96	Homo sapiens	6	2	2	4.6	80.498	737	0	40.844	4.6	0	0	0	2			53
A0A1B0GV47;Q7Z4S6	Kinesin-like protein KIF21A	KIF21A	tr|A0A1B0GV47|A0A1B0GV47_HUMAN Kinesin-like protein KIF21A (Fragment) OS=Homo sapiens OX=9606 GN=KIF21A PE=1 SV=1;sp|Q7Z4S6|KI21A_HUMAN Kinesin-like protein KIF21A OS=Homo sapiens OX=9606 GN=KIF21A PE=1 SV=2	Homo sapiens	2	1	1	0.8	184.71	1653	0	2.4642	0.8	0	0	0	1			64
A0A2R8Y7U1;A0A2R8YGD1;A0A2R8YD45;O14773	Tripeptidyl-peptidase 1	TPP1	tr|A0A2R8Y7U1|A0A2R8Y7U1_HUMAN Tripeptidyl aminopeptidase (Fragment) OS=Homo sapiens OX=9606 GN=TPP1 PE=1 SV=1;tr|A0A2R8YGD1|A0A2R8YGD1_HUMAN Tripeptidyl aminopeptidase OS=Homo sapiens OX=9606 GN=TPP1 PE=1 SV=1;tr|A0A2R8YD45|A0A2R8YD45_HUMAN Tripeptidyl-pe	Homo sapiens	4	1	1	3.5	43.568	400	0	21.319	3.5	0	0	0	1			75
A0A2R8Y7W2;E7ER27;A0A2R8Y7L2;E7ET17;A0A2R8YD50;P51659	Peroxisomal multifunctional enzyme type 2;(3R)-hydroxyacyl-CoA dehydrogenase;Enoyl-CoA hydratase 2	HSD17B4	tr|A0A2R8Y7W2|A0A2R8Y7W2_HUMAN Peroxisomal multifunctional enzyme type 2 OS=Homo sapiens OX=9606 GN=HSD17B4 PE=1 SV=1;tr|E7ER27|E7ER27_HUMAN Peroxisomal multifunctional enzyme type 2 OS=Homo sapiens OX=9606 GN=HSD17B4 PE=1 SV=3;tr|A0A2R8Y7L2|A0A2R8Y7L2_HUM	Homo sapiens	6	1	1	14.3	11.625	105	0	5.0019	14.3	0	0	0	1			74
A0A494C0Q7;A0A494C1K3;P78347	General transcription factor II-I	GTF2I	tr|A0A494C0Q7|A0A494C0Q7_HUMAN General transcription factor II-I (Fragment) OS=Homo sapiens OX=9606 GN=GTF2I PE=1 SV=1;tr|A0A494C1K3|A0A494C1K3_HUMAN General transcription factor II-I OS=Homo sapiens OX=9606 GN=GTF2I PE=1 SV=1;sp|P78347|GTF2I_HUMAN General	Homo sapiens	3	1	1	10.4	22.373	192	0.0016863	2.0983	10.4	0	0	0	2			83
A0A6Q8PGG2;A0A6Q8PHL8;A0A6Q8PH45;A0A1B0GUA3;Q96EK5	KIF1-binding protein	KIAA1279	tr|A0A6Q8PGG2|A0A6Q8PGG2_HUMAN KIF-binding protein OS=Homo sapiens OX=9606 GN=KIFBP PE=1 SV=1;tr|A0A6Q8PHL8|A0A6Q8PHL8_HUMAN KIF-binding protein OS=Homo sapiens OX=9606 GN=KIFBP PE=1 SV=1;tr|A0A6Q8PH45|A0A6Q8PH45_HUMAN KIF-binding protein OS=Homo sapiens O	Homo sapiens	5	1	1	4.2	52.619	449	0.0047244	1.6959	4.2	0	0	0	1			63
B1AUU8;P42566	Epidermal growth factor receptor substrate 15	EPS15	tr|B1AUU8|B1AUU8_HUMAN Epidermal growth factor receptor substrate 15 OS=Homo sapiens OX=9606 GN=EPS15 PE=1 SV=1;sp|P42566|EPS15_HUMAN Epidermal growth factor receptor substrate 15 OS=Homo sapiens OX=9606 GN=EPS15 PE=1 SV=2	Homo sapiens	2	1	1	1.7	83.653	762	0.0017241	2.2618	1.7	0	0	0	1			109
B5MCW2;H7C422;G5E9G0;P39023;Q92901	60S ribosomal protein L3;60S ribosomal protein L3-like	RPL3;RPL3L	tr|B5MCW2|B5MCW2_HUMAN 60S ribosomal protein L3 (Fragment) OS=Homo sapiens OX=9606 GN=RPL3 PE=1 SV=1;tr|H7C422|H7C422_HUMAN 60S ribosomal protein L3 (Fragment) OS=Homo sapiens OX=9606 GN=RPL3 PE=1 SV=1;tr|G5E9G0|G5E9G0_HUMAN 60S ribosomal protein L3 OS=Hom	Homo sapiens	5	1	1	4	31.243	272	0.0016529	1.9774	4	0	0	0	1			118
E2QRI1;Q32P28	Prolyl 3-hydroxylase 1	P3H1;LEPRE1	tr|E2QRI1|E2QRI1_HUMAN Prolyl 3-hydroxylase 1 (Fragment) OS=Homo sapiens OX=9606 GN=P3H1 PE=1 SV=1;sp|Q32P28|P3H1_HUMAN Prolyl 3-hydroxylase 1 OS=Homo sapiens OX=9606 GN=P3H1 PE=1 SV=2	Homo sapiens	2	1	1	4.8	23.085	207	0	3.0386	4.8	0	0	0	1			153
E7EUH7;Q96PZ0	Pseudouridylate synthase 7 homolog	PUS7	tr|E7EUH7|E7EUH7_HUMAN Pseudouridylate synthase 7 homolog OS=Homo sapiens OX=9606 GN=PUS7 PE=1 SV=1;sp|Q96PZ0|PUS7_HUMAN Pseudouridylate synthase 7 homolog OS=Homo sapiens OX=9606 GN=PUS7 PE=1 SV=2	Homo sapiens	2	1	1	4	50.552	448	0.0017212	2.2507	4	0	0	0	1			167
E9PS77;Q9NW68	BSD domain-containing protein 1	BSDC1	tr|E9PS77|E9PS77_HUMAN BSD domain-containing protein 1 (Fragment) OS=Homo sapiens OX=9606 GN=BSDC1 PE=1 SV=1;sp|Q9NW68|BSDC1_HUMAN BSD domain-containing protein 1 OS=Homo sapiens OX=9606 GN=BSDC1 PE=1 SV=1	Homo sapiens	2	1	1	12.2	17.397	156	0.0077042	1.5722	12.2	0	0	0	1			193
F5GXT3;Q9NQ90	Anoctamin;Anoctamin-2	ANO2	tr|F5GXT3|F5GXT3_HUMAN Anoctamin OS=Homo sapiens OX=9606 GN=ANO2 PE=1 SV=2;sp|Q9NQ90|ANO2_HUMAN Anoctamin-2 OS=Homo sapiens OX=9606 GN=ANO2 PE=1 SV=2	Homo sapiens	2	1	1	2.3	113.88	1003	0.0016207	1.8474	2.3	0	0	0	1			197
F5GZQ3;P55084	Trifunctional enzyme subunit beta, mitochondrial;3-ketoacyl-CoA thiolase	HADHB	tr|F5GZQ3|F5GZQ3_HUMAN Trifunctional enzyme subunit beta, mitochondrial OS=Homo sapiens OX=9606 GN=HADHB PE=1 SV=1;sp|P55084|ECHB_HUMAN Trifunctional enzyme subunit beta, mitochondrial OS=Homo sapiens OX=9606 GN=HADHB PE=1 SV=3	Homo sapiens	2	1	1	2	49.597	459	0	5.0607	2	0	0	0	1			198
F8VXC8;Q8TAQ2;F8VZW6	SWI/SNF complex subunit SMARCC2	SMARCC2	tr|F8VXC8|F8VXC8_HUMAN SWI/SNF complex subunit SMARCC2 OS=Homo sapiens OX=9606 GN=SMARCC2 PE=1 SV=1;sp|Q8TAQ2|SMRC2_HUMAN SWI/SNF complex subunit SMARCC2 OS=Homo sapiens OX=9606 GN=SMARCC2 PE=1 SV=1;tr|F8VZW6|F8VZW6_HUMAN SWI/SNF complex subunit SMARCC2 OS	Homo sapiens	3	2	2	3	136.18	1245	0	10.912	3	0	0	0	2			207
F8WEW2;F8WE84;P61158	Actin-related protein 3	ACTR3	tr|F8WEW2|F8WEW2_HUMAN Actin-related protein 3 OS=Homo sapiens OX=9606 GN=ACTR3 PE=1 SV=1;tr|F8WE84|F8WE84_HUMAN Actin-related protein 3 OS=Homo sapiens OX=9606 GN=ACTR3 PE=1 SV=1;sp|P61158|ARP3_HUMAN Actin-related protein 3 OS=Homo sapiens OX=9606 GN=ACTR	Homo sapiens	3	1	1	50	3.5941	34	0	6.5252	50	0	0	0	1			213
H0YHR3;Q8WYL5	Protein phosphatase Slingshot homolog 1	SSH1	tr|H0YHR3|H0YHR3_HUMAN Protein phosphatase Slingshot homolog 1 (Fragment) OS=Homo sapiens OX=9606 GN=SSH1 PE=1 SV=1;sp|Q8WYL5|SSH1_HUMAN Protein phosphatase Slingshot homolog 1 OS=Homo sapiens OX=9606 GN=SSH1 PE=1 SV=2	Homo sapiens	2	1	1	16.8	10.927	95	0.0046948	1.6327	16.8	0	0	0	1			227
H0YKS0;H0YKT8;H0YMI6;H0YMA1;H0YMZ1;H0YN18;H0YL69;P25789	Proteasome subunit beta type;Proteasome subunit alpha type;Proteasome subunit alpha type-4	PSMA4	tr|H0YKS0|H0YKS0_HUMAN Proteasome subunit alpha type-4 (Fragment) OS=Homo sapiens OX=9606 GN=PSMA4 PE=1 SV=1;tr|H0YKT8|H0YKT8_HUMAN Proteasome subunit beta (Fragment) OS=Homo sapiens OX=9606 GN=PSMA4 PE=1 SV=8;tr|H0YMI6|H0YMI6_HUMAN Proteasome subunit alph	Homo sapiens	8	1	1	6.6	13.599	122	0	2.4948	6.6	0	0	0	1			230
H0YLW7;H0YMW8;H0YNF3;H0YMR6;H0YLE6;H0YL55;H7BXE3;Q9NWH9	SAFB-like transcription modulator	SLTM	tr|H0YLW7|H0YLW7_HUMAN SAFB-like transcription modulator OS=Homo sapiens OX=9606 GN=SLTM PE=1 SV=1;tr|H0YMW8|H0YMW8_HUMAN SAFB-like transcription modulator OS=Homo sapiens OX=9606 GN=SLTM PE=1 SV=1;tr|H0YNF3|H0YNF3_HUMAN SAFB-like transcription modulator (	Homo sapiens	8	1	1	32.3	6.6127	62	0	19.431	32.3	0	0	0	1			232
H3BV85;H3BTW0;A0A0B4J295;A0A087WZT3;H3BVE0;Q9H3K6	BolA-like protein 2	BOLA2B;BOLA2	tr|H3BV85|H3BV85_HUMAN BolA-like protein 2 OS=Homo sapiens OX=9606 GN=BOLA2B PE=1 SV=2;tr|H3BTW0|H3BTW0_HUMAN BOLA2-SMG1P6 readthrough (Fragment) OS=Homo sapiens OX=9606 GN=BOLA2-SMG1P6 PE=3 SV=1;tr|A0A0B4J295|A0A0B4J295_HUMAN BOLA2-SMG1P6 readthrough OS=H	Homo sapiens	6	1	1	29.6	6.3612	54	0	16.25	29.6	0	0	0	1			26
H7C123;H7C2C5;F8W7C6;A0A087WV22;X1WI28;Q96L21;P27635	60S ribosomal protein L10-like;60S ribosomal protein L10	RPL10;RPL10L	tr|H7C123|H7C123_HUMAN 60S ribosomal protein L10 (Fragment) OS=Homo sapiens OX=9606 GN=RPL10 PE=1 SV=1;tr|H7C2C5|H7C2C5_HUMAN 60S ribosomal protein L10 (Fragment) OS=Homo sapiens OX=9606 GN=RPL10 PE=1 SV=1;tr|F8W7C6|F8W7C6_HUMAN 60S ribosomal protein L10 O	Homo sapiens	7	1	1	12.1	10.028	91	0	10.903	12.1	0	0	0	1			12
I3L4X0;H3BV22;H3BTA2;P60510	Serine/threonine-protein phosphatase;Serine/threonine-protein phosphatase 4 catalytic subunit	PPP4C	tr|I3L4X0|I3L4X0_HUMAN Protein-serine/threonine phosphatase OS=Homo sapiens OX=9606 GN=PPP4C PE=1 SV=1;tr|H3BV22|H3BV22_HUMAN Serine/threonine-protein phosphatase (Fragment) OS=Homo sapiens OX=9606 GN=PPP4C PE=1 SV=1;tr|H3BTA2|H3BTA2_HUMAN Serine/threonine	Homo sapiens	4	1	1	9.2	13.37	120	0	10.588	9.2	0	0	0	1			241
J3KMZ8;Q92785	Zinc finger protein ubi-d4	DPF2	tr|J3KMZ8|J3KMZ8_HUMAN Zinc finger protein ubi-d4 OS=Homo sapiens OX=9606 GN=DPF2 PE=1 SV=1;sp|Q92785|REQU_HUMAN Zinc finger protein ubi-d4 OS=Homo sapiens OX=9606 GN=DPF2 PE=1 SV=2	Homo sapiens	2	2	2	7.7	45.78	405	0.0017513	2.3816	7.7	0	0	0	2			249
J3QQI1;J3QLF3;J3QL90;J3KRL5;J3QR71;J3QKV7;J3QRI9;J3QKW7;A8MZF9;P55039	Developmentally-regulated GTP-binding protein 2	DRG2	tr|J3QQI1|J3QQI1_HUMAN Developmentally-regulated GTP-binding protein 2 OS=Homo sapiens OX=9606 GN=DRG2 PE=1 SV=1;tr|J3QLF3|J3QLF3_HUMAN Developmentally-regulated GTP-binding protein 2 OS=Homo sapiens OX=9606 GN=DRG2 PE=1 SV=1;tr|J3QL90|J3QL90_HUMAN Develop	Homo sapiens	10	1	1	54.5	2.574	22	0.0016474	1.9329	54.5	0	0	0	1			102
K7EIG1;I3L2B0;A0A494C0R8;O75153	Clustered mitochondria protein homolog	CLUH	tr|K7EIG1|K7EIG1_HUMAN Clustered mitochondria protein homolog (Fragment) OS=Homo sapiens OX=9606 GN=CLUH PE=1 SV=2;tr|I3L2B0|I3L2B0_HUMAN Clustered mitochondria protein homolog OS=Homo sapiens OX=9606 GN=CLUH PE=1 SV=3;tr|A0A494C0R8|A0A494C0R8_HUMAN Cluste	Homo sapiens	4	1	1	0.9	140.49	1251	0	10.578	0.9	0	0	0	1			84
M0QXG9;M0R3F4;M0R2A4;M0R2K3;M0R193;M0R0I0;M0R2I2;J3KQS6;Q9NWV8	BRISC and BRCA1-A complex member 1	BABAM1	tr|M0QXG9|M0QXG9_HUMAN BRISC and BRCA1-A complex member 1 OS=Homo sapiens OX=9606 GN=BABAM1 PE=1 SV=2;tr|M0R3F4|M0R3F4_HUMAN BRISC and BRCA1-A complex member 1 (Fragment) OS=Homo sapiens OX=9606 GN=BABAM1 PE=1 SV=1;tr|M0R2A4|M0R2A4_HUMAN BRISC and BRCA1-A	Homo sapiens	9	1	1	21.3	11.545	108	0	4.9727	21.3	0	0	0	1			251
Q5JZ02;Q96S44	TP53-regulating kinase	TP53RK	tr|Q5JZ02|Q5JZ02_HUMAN Non-specific serine/threonine protein kinase OS=Homo sapiens OX=9606 GN=TP53RK PE=1 SV=1;sp|Q96S44|PRPK_HUMAN EKC/KEOPS complex subunit TP53RK OS=Homo sapiens OX=9606 GN=TP53RK PE=1 SV=2	Homo sapiens	2	1	1	17.4	13.659	121	0.0017452	2.3752	17.4	0	0	0	1			567
Q5T8C6;Q13042	Cell division cycle protein 16 homolog	CDC16	tr|Q5T8C6|Q5T8C6_HUMAN Cell division cycle protein 16 homolog OS=Homo sapiens OX=9606 GN=CDC16 PE=1 SV=1;sp|Q13042|CDC16_HUMAN Cell division cycle protein 16 homolog OS=Homo sapiens OX=9606 GN=CDC16 PE=1 SV=2	Homo sapiens	2	1	1	3.2	54.704	475	0	2.6628	3.2	0	0	0	1			518
Q5VZS7;Q53EL6	Programmed cell death protein 4	PDCD4	tr|Q5VZS7|Q5VZS7_HUMAN Programmed cell death protein 4 (Fragment) OS=Homo sapiens OX=9606 GN=PDCD4 PE=1 SV=1;sp|Q53EL6|PDCD4_HUMAN Programmed cell death protein 4 OS=Homo sapiens OX=9606 GN=PDCD4 PE=1 SV=2	Homo sapiens	2	1	1	7.4	25.197	231	0.0016393	1.9014	7.4	0	0	0	1			563
R4GMY8;E5RHG8;Q15369	Transcription elongation factor B polypeptide 1	TCEB1	tr|R4GMY8|R4GMY8_HUMAN Elongin-C OS=Homo sapiens OX=9606 GN=ELOC PE=1 SV=1;tr|E5RHG8|E5RHG8_HUMAN Elongin-C (Fragment) OS=Homo sapiens OX=9606 GN=ELOC PE=1 SV=1;sp|Q15369|ELOC_HUMAN Elongin-C OS=Homo sapiens OX=9606 GN=ELOC PE=1 SV=1	Homo sapiens	3	1	1	21.5	6.968	65	0	2.6202	21.5	0	0	0	1			156
CON__P04264;P04264;CON__Q9R0H5;CON__Q6NXH9;CON__Q6IFZ6;CON__Q7Z794;CON__ENSEMBL:ENSBTAP00000038253;CON__P35908v2;CON__P35908;Q7Z794;P35908	Keratin, type II cytoskeletal 1;Keratin, type II cytoskeletal 1b;Keratin, type II cytoskeletal 2 epidermal	KRT1;KRT77;KRT2	;sp|P04264|K2C1_HUMAN Keratin, type II cytoskeletal 1 OS=Homo sapiens OX=9606 GN=KRT1 PE=1 SV=6;;;;;;;;sp|Q7Z794|K2C1B_HUMAN Keratin, type II cytoskeletal 1b OS=Homo sapiens OX=9606 GN=KRT77 PE=1 SV=3;sp|P35908|K22E_HUMAN Keratin, type II cytoskeletal 2 ep	con_homo sapiens	11	2	2	5	66.017	644	0	26.341	5	7164600	7164600	0.00970092	2		+	142
CON__P00761				con	1	2	2	10	24.409	231	0	13.618	10	118850000	118850000	0.160924	3		+	141
lcl|NC_017825.1_prot_YP_006272959.1_11		VII	lcl|NC_017825.1_prot_YP_006272959.1_11 [locus_tag=YOE_gp11] [db_xref=GeneID:12657145] [protein=pVII] [protein_id=YP_006272959.1] [location=15493..16074] [gbkey=CDS]	AZ_Chimpanzee Adendovirus Y25	1	15	15	61.7	21.265	193	0	127.99	61.7	5481900000	5481900000	7.42253	60			272
lcl|NC_017825.1_prot_YP_006272966.1_18		100k	lcl|NC_017825.1_prot_YP_006272966.1_18 [locus_tag=YOE_gp18] [db_xref=GeneID:12657121] [protein=100kDa] [protein_id=YP_006272966.1] [location=23419..25827] [gbkey=CDS]	AZ_Chimpanzee Adendovirus Y25	1	55	55	74.6	88.74	802	0	323.31	74.6	4753400000	4753400000	6.43614	186			278
lcl|NC_017825.1_prot_YP_006272962.1_14		VI	lcl|NC_017825.1_prot_YP_006272962.1_14 [locus_tag=YOE_gp14] [db_xref=GeneID:12657117] [protein=pVI] [protein_id=YP_006272962.1] [location=17470..18201] [gbkey=CDS]	AZ_Chimpanzee Adendovirus Y25	1	21	21	82.3	26.267	243	0	306.2	82.3	2395300000	2395300000	3.24325	71			274
lcl|NC_017825.1_prot_YP_006272960.1_12		V	lcl|NC_017825.1_prot_YP_006272960.1_12 [locus_tag=YOE_gp12] [db_xref=GeneID:12657115] [protein=pV] [protein_id=YP_006272960.1] [location=16119..17141] [gbkey=CDS]	AZ_Chimpanzee Adendovirus Y25	1	29	29	61.2	38.899	340	0	323.31	61.2	1820500000	1820500000	2.46497	83			273
lcl|NC_017825.1_prot_YP_006272957.1_9		IIIa	lcl|NC_017825.1_prot_YP_006272957.1_9 [locus_tag=YOE_gp09] [db_xref=GeneID:12657143] [protein=pIIIa] [protein_id=YP_006272957.1] [location=12041..13810] [gbkey=CDS]	AZ_Chimpanzee Adendovirus Y25	1	33	33	71.5	65.884	589	0	323.31	71.5	1715200000	1715200000	2.32239	102			270
lcl|NC_017825.1_prot_YP_006272965.1_17		DBP	lcl|NC_017825.1_prot_YP_006272965.1_17 [locus_tag=YOE_gp17] [db_xref=GeneID:12657120] [protein=DNA binding protein] [protein_id=YP_006272965.1] [location=complement(21852..23390)] [gbkey=CDS]	AZ_Chimpanzee Adendovirus Y25	1	34	34	67.8	57.286	512	0	323.31	67.8	1057900000	1057900000	1.4324	71			277
lcl|NC_017825.1_prot_YP_006272953.1_5		IVa2	lcl|NC_017825.1_prot_YP_006272953.1_5 [locus_tag=YOE_gp05] [db_xref=GeneID:12657139] [protein=IVa2] [protein_id=YP_006272953.1] [location=complement(join(3978..5311,5590..5602))] [gbkey=CDS]	AZ_Chimpanzee Adendovirus Y25	1	22	21	70.5	50.364	448	0	224.06	70.5	1001500000	1001500000	1.35604	60			266
lcl|NC_017825.1_prot_YP_006272963.1_15		hexon	lcl|NC_017825.1_prot_YP_006272963.1_15 [locus_tag=YOE_gp15] [db_xref=GeneID:12657118] [protein=hexon] [protein_id=YP_006272963.1] [location=18302..21130] [gbkey=CDS]	AZ_Chimpanzee Adendovirus Y25	1	35	35	44.8	106.03	942	0	323.31	44.8	901770000	901770000	1.221	69			275
lcl|NC_017825.1_prot_YP_006272969.1_21		VIII	lcl|NC_017825.1_prot_YP_006272969.1_21 [locus_tag=YOE_gp21] [db_xref=GeneID:12657124] [protein=pVIII] [protein_id=YP_006272969.1] [location=26455..27138] [gbkey=CDS]	AZ_Chimpanzee Adendovirus Y25	1	9	9	66.5	24.757	227	0	190.23	66.5	892110000	892110000	1.20792	35			281
lcl|NC_017825.1_prot_YP_006272956.1_8		52/55K	lcl|NC_017825.1_prot_YP_006272956.1_8 [locus_tag=YOE_gp08] [db_xref=GeneID:12657142] [protein=52/55kDa] [protein_id=YP_006272956.1] [location=10827..12017] [gbkey=CDS]	AZ_Chimpanzee Adendovirus Y25	1	19	19	45.2	44.84	396	0	297.1	45.2	852700000	852700000	1.15456	43			269
lcl|NC_017825.1_prot_YP_006272958.1_10		penton	lcl|NC_017825.1_prot_YP_006272958.1_10 [locus_tag=YOE_gp10] [db_xref=GeneID:12657144] [protein=penton] [protein_id=YP_006272958.1] [location=13891..15489] [gbkey=CDS]	AZ_Chimpanzee Adendovirus Y25	1	18	18	47.2	59.479	532	0	206.16	47.2	852650000	852650000	1.15449	44			271
lcl|NC_017825.1_prot_YP_006272952.1_4		IX	lcl|NC_017825.1_prot_YP_006272952.1_4 [locus_tag=YOE_gp04] [db_xref=GeneID:12657138] [protein=pIX] [protein_id=YP_006272952.1] [location=3491..3919] [gbkey=CDS]	AZ_Chimpanzee Adendovirus Y25	1	7	7	93	14.459	142	0	191.6	93	399000000	399000000	0.540249	30			265
lcl|NC_017825.1_prot_YP_006272967.1_19		33K	lcl|NC_017825.1_prot_YP_006272967.1_19 [locus_tag=YOE_gp19] [db_xref=GeneID:12657122] [protein=33K] [protein_id=YP_006272967.1] [location=join(25544..25871,26041..26372)] [gbkey=CDS]	AZ_Chimpanzee Adendovirus Y25	1	8	8	31.1	24.662	219	0	71.545	31.1	178920000	178920000	0.242259	23			279
lcl|NC_017825.1_prot_YP_006272964.1_16		endoprotease	lcl|NC_017825.1_prot_YP_006272964.1_16 [locus_tag=YOE_gp16] [db_xref=GeneID:12657119] [protein=endoprotease] [protein_id=YP_006272964.1] [location=21146..21775] [gbkey=CDS]	AZ_Chimpanzee Adendovirus Y25	1	9	9	48.3	23.84	209	0	31.41	48.3	62397000	62397000	0.084486	19			276
lcl|NC_017825.1_prot_YP_006272973.1_25		fiber	lcl|NC_017825.1_prot_YP_006272973.1_25 [locus_tag=YOE_gp25] [db_xref=GeneID:12657128] [protein=fiber] [protein_id=YP_006272973.1] [location=32290..33621] [gbkey=CDS]	AZ_Chimpanzee Adendovirus Y25	1	5	5	18.7	47.304	443	0	18.846	18.7	26029000	26029000	0.0352435	9			282
lcl|NC_017825.1_prot_YP_006272968.1_20		22K	lcl|NC_017825.1_prot_YP_006272968.1_20 [locus_tag=YOE_gp20] [db_xref=GeneID:12657123] [protein=22K] [protein_id=YP_006272968.1] [location=25544..26098] [gbkey=CDS]	AZ_Chimpanzee Adendovirus Y25	1	6	6	39.7	20.916	184	0	14.48	39.7	21271000	21271000	0.0288011	8			280
lcl|NC_017825.1_prot_YP_006272955.1_7		TP	lcl|NC_017825.1_prot_YP_006272955.1_7 [locus_tag=YOE_gp07] [db_xref=GeneID:12657141] [protein=pTP] [protein_id=YP_006272955.1] [location=complement(join(8461..10392,13838..13846))] [gbkey=CDS]	AZ_Chimpanzee Adendovirus Y25	1	4	4	6.5	74.389	646	0	9.4187	6.5	8750000	8750000	0.0118476	5			268
lcl|NC_017825.1_prot_YP_006272978.1_30		E4Orf2	lcl|NC_017825.1_prot_YP_006272978.1_30 [locus_tag=YOE_gp30] [db_xref=GeneID:12657134] [protein=E4Orf2] [protein_id=YP_006272978.1] [location=complement(35491..35880)] [gbkey=CDS]	AZ_Chimpanzee Adendovirus Y25	1	1	1	17.8	14.698	129	0	3.6428	17.8	1519500	1519500	0.00205741	2			283
lcl|NC_017825.1_prot_YP_006272954.1_6		polymerase	lcl|NC_017825.1_prot_YP_006272954.1_6 [locus_tag=YOE_gp06] [db_xref=GeneID:12657140] [protein=polymerase] [protein_id=YP_006272954.1] [location=complement(join(5081..8662,13838..13846))] [gbkey=CDS]	AZ_Chimpanzee Adendovirus Y25	1	1	1	1.5	135.45	1196	0	3.8381	1.5	1297800	1297800	0.00175723	1			267

## Sheet: in-sol HAdV-C5-EGFP
															GVO 884 HAdV-C5-EGFP
Protein IDs	Protein names	Gene names	Gene name	Fasta headers	species	Number of proteins	Peptides	Unique peptides	Sequence coverage [%]	Mol. weight [kDa]	Sequence length	Q-value	Score	Intensity	Intensity GVO 884	Rank GVO 884	% Intensity GVO 884	Only identified by site	Potential contaminant	id
lcl|NC_017825.1_prot_YP_006272963.1_15		hexon	hexon	lcl|NC_017825.1_prot_YP_006272963.1_15 [locus_tag=YOE_gp15] [db_xref=GeneID:12657118] [protein=hexon] [protein_id=YP_006272963.1] [location=18302..21130] [gbkey=CDS]	Human Adenovirus C5	1	69	69	81.8	106.03	942	0	323.31	13268000000	347310000	1	34.433			354
CON__P00761				>P00761 SWISS-PROT:P00761|TRYP_PIG Trypsin - Sus scrofa (Pig).	con_Sus scrofa	1	5	5	24.7	24.409	231	0	50.616	874150000	242030000	2	23.9953		+	181
P04264;CON__P04264	Keratin, type II cytoskeletal 1	KRT1	KRT1	sp|P04264|K2C1_HUMAN Keratin, type II cytoskeletal 1 OS=Homo sapiens OX=9606 GN=KRT1 PE=1 SV=6;	con_Homo sapiens	2	49	37	57.9	66.038	644	0	323.31	681600000	148080000	3	14.6809		+	427
CON__P13645;P13645;CON__Q148H6;CON__Q7Z3Y7;CON__Q2M2I5;Q7Z3Y7;Q2M2I5;A0A3B3ITG2;CON__P05784;CON__Q99456;Q99456;F8VZY9;CON__Q14525;CON__Q9UE12;CON__Q15323;CON__A2A5Y0;CON__Q92764;C4AM86;CON__Q14532;CON__Q7Z3Z0;CON__A2AB72;CON__Q497I4;CON__O76015;CON__Q7Z3Y8;CON__O76013;CON__O76014;CON__REFSEQ:XP_986630;Q14525;Q15323;P05783;Q14532;O76014;Q7Z3Z0;Q92764;O76015;Q7Z3Y8;O76013	Keratin, type I cytoskeletal 10	KRT10	KRT10	;sp|P13645|K1C10_HUMAN Keratin, type I cytoskeletal 10 OS=Homo sapiens OX=9606 GN=KRT10 PE=1 SV=6	con_Homo sapiens	37	39	27	63.2	59.51	593	0	323.31	435670000	83889000	4	8.31692		+	192
P35527;CON__P35527;K7EQQ3	Keratin, type I cytoskeletal 9	KRT9	KRT9	sp|P35527|K1C9_HUMAN Keratin, type I cytoskeletal 9 OS=Homo sapiens OX=9606 GN=KRT9 PE=1 SV=3;;tr|K7EQQ3|K7EQQ3_HUMAN Keratin, type I cytoskeletal 9 OS=Homo sapiens OX=9606 GN=KRT9 PE=1 SV=1	con_Homo sapiens	3	37	36	69.3	62.064	623	0	323.31	233530000	72384000	5	7.17629		+	536
CON__P35908v2;P35908;CON__P35908;Q01546;CON__Q01546;CON__P07744;H0YID6;CON__Q9R0H5;CON__P19013;P19013;H0YHD9;CON__REFSEQ:XP_932229	Keratin, type II cytoskeletal 2 epidermal	KRT2	KRT2	;sp|P35908|K22E_HUMAN Keratin, type II cytoskeletal 2 epidermal OS=Homo sapiens OX=9606 GN=KRT2 PE=1 SV=2;	con_Homo sapiens	12	46	33	75	65.432	639	0	323.31	223330000	52790000	6	5.23371		+	194
lcl|NC_017825.1_prot_YP_006272957.1_9		pIIIa	pIIIa	lcl|NC_017825.1_prot_YP_006272957.1_9 [locus_tag=YOE_gp09] [db_xref=GeneID:12657143] [protein=pIIIa] [protein_id=YP_006272957.1] [location=12041..13810] [gbkey=CDS]	Human Adenovirus C5	1	36	36	72.3	65.884	589	0	323.31	718790000	13281000	7	1.3167			349
lcl|NC_017825.1_prot_YP_006272958.1_10		penton	penton	lcl|NC_017825.1_prot_YP_006272958.1_10 [locus_tag=YOE_gp10] [db_xref=GeneID:12657144] [protein=penton] [protein_id=YP_006272958.1] [location=13891..15489] [gbkey=CDS]	Human Adenovirus C5	1	24	24	54.7	59.479	532	0	323.31	409580000	11699000	8	1.15986			350
CON__P13647;P13647;F8W0C6;F8VV57;H0YI76;H0YIN9;F8VU69	Keratin, type II cytoskeletal 5	KRT5	KRT5	;sp|P13647|K2C5_HUMAN Keratin, type II cytoskeletal 5 OS=Homo sapiens OX=9606 GN=KRT5 PE=1 SV=3	con_Homo sapiens	7	28	8	39.8	62.378	590	0	200.26	23136000	5094900	9	0.505119		+	193
H7C5R5;F8WAE5;Q9BY44	Eukaryotic translation initiation factor 2A;Eukaryotic translation initiation factor 2A, N-terminally processed	EIF2A	EIF2A	tr|H7C5R5|H7C5R5_HUMAN Eukaryotic translation initiation factor 2A (Fragment) OS=Homo sapiens OX=9606 GN=EIF2A PE=1 SV=1;tr|F8WAE5|F8WAE5_HUMAN Eukaryotic translation initiation factor 2A OS=Homo sapiens OX=9606 GN=EIF2A PE=1 SV=1;sp|Q9BY44|EIF2A_HUMAN Euk	Homo sapiens	3	1	1	2.8	35.189	316	0	6.7693	4938100	4938100	10	0.489573			270
E7ES33;E7EPK1;Q16181;A0A5F9ZGZ7;A0A0U1RRD1;G3V1Q4;A0A0U1RRH9;A0A0U1RRE1	Septin-7	2007-09-01	2007-09-01	tr|E7ES33|E7ES33_HUMAN Septin-7 OS=Homo sapiens OX=9606 GN=SEPTIN7 PE=1 SV=3;tr|E7EPK1|E7EPK1_HUMAN Septin-7 OS=Homo sapiens OX=9606 GN=SEPTIN7 PE=1 SV=2;sp|Q16181|SEPT7_HUMAN Septin-7 OS=Homo sapiens OX=9606 GN=SEPTIN7 PE=1 SV=2;tr|A0A5F9ZGZ7|A0A5F9ZGZ7_H	Homo sapiens	8	4	3	17.5	48.715	417	0	115.8	10391000	4888800	11	0.484685			221
CON__P08779;P08779;K7ENW6;CON__Q9Z2K1;CON__Q3ZAW8	Keratin, type I cytoskeletal 16	KRT16	KRT16	;sp|P08779|K1C16_HUMAN Keratin, type I cytoskeletal 16 OS=Homo sapiens OX=9606 GN=KRT16 PE=1 SV=4	con_Homo sapiens	5	23	12	55.2	51.267	473	0	323.31	17806000	3187200	12	0.315985		+	191
B1AMS2;Q14141	Septin-6	2006-09-01	2006-09-01	tr|B1AMS2|B1AMS2_HUMAN Septin 6, isoform CRA_b OS=Homo sapiens OX=9606 GN=SEPTIN6 PE=1 SV=1;sp|Q14141|SEPT6_HUMAN Septin-6 OS=Homo sapiens OX=9606 GN=SEPTIN6 PE=1 SV=4	Homo sapiens	2	4	4	19.3	49.303	431	0	49.066	9946900	2839600	13	0.281524			137
Q15019;C9IZU3;C9J938;C9JB25;B5MCX3;C9JZI2;C9JQJ4;A0A1B0GXJ2;C9JFT1;F8WB65;C9IY94;C9J2Q4;C9JT15;C9JSE7;B5MD47;H7C310;H7C2Y0	Septin-2	2002-09-01	2002-09-01	sp|Q15019|SEPT2_HUMAN Septin-2 OS=Homo sapiens OX=9606 GN=SEPTIN2 PE=1 SV=1;tr|C9IZU3|C9IZU3_HUMAN Septin-2 (Fragment) OS=Homo sapiens OX=9606 GN=SEPTIN2 PE=1 SV=1;tr|C9J938|C9J938_HUMAN Septin-2 (Fragment) OS=Homo sapiens OX=9606 GN=SEPTIN2 PE=1 SV=1;tr|C	Homo sapiens	17	7	6	34.3	41.487	361	0	181.98	3184700	1901000	14	0.188469			684
CON__P02533;P02533;CON__Q6IFX2;K7ENV3;CON__Q61782	Keratin, type I cytoskeletal 14	KRT14	KRT14	;sp|P02533|K1C14_HUMAN Keratin, type I cytoskeletal 14 OS=Homo sapiens OX=9606 GN=KRT14 PE=1 SV=4	con_Homo sapiens	5	22	7	48.9	51.621	472	0	196.41	11102000	1886000	15	0.186982		+	182
lcl|NC_017825.1_prot_YP_006272959.1_11		pVII	pVII	lcl|NC_017825.1_prot_YP_006272959.1_11 [locus_tag=YOE_gp11] [db_xref=GeneID:12657145] [protein=pVII] [protein_id=YP_006272959.1] [location=15493..16074] [gbkey=CDS]	Human Adenovirus C5	1	15	15	48.2	21.265	193	0	323.31	381440000	1409700	16	0.13976			351
lcl|NC_017825.1_prot_YP_006272962.1_14		pVI	pVI	lcl|NC_017825.1_prot_YP_006272962.1_14 [locus_tag=YOE_gp14] [db_xref=GeneID:12657117] [protein=pVI] [protein_id=YP_006272962.1] [location=17470..18201] [gbkey=CDS]	Human Adenovirus C5	1	19	19	73.3	26.267	243	0	323.31	287680000	796890	17	0.0790053			353
M0QZK8;O75223	Gamma-glutamylcyclotransferase	GGCT	GGCT	tr|M0QZK8|M0QZK8_HUMAN Gamma-glutamylcyclotransferase OS=Homo sapiens OX=9606 PE=4 SV=1;sp|O75223|GGCT_HUMAN Gamma-glutamylcyclotransferase OS=Homo sapiens OX=9606 GN=GGCT PE=1 SV=1	Homo sapiens	2	2	2	28.2	11.578	103	0	10.883	853830	783190	18	0.077647			365
CON__P48668;P48668	Keratin, type II cytoskeletal 6C	KRT6C	KRT6C	;sp|P48668|K2C6C_HUMAN Keratin, type II cytoskeletal 6C OS=Homo sapiens OX=9606 GN=KRT6C PE=1 SV=3	con_Homo sapiens	2	26	0	42.2	60.024	564	0	169.71	9837700	735630	19	0.0729318		+	195
A0A3B3IS46;A0A3B3IRX3;Q71F56	Mediator of RNA polymerase II transcription subunit 13-like	MED13L	MED13L	tr|A0A3B3IS46|A0A3B3IS46_HUMAN Mediator of RNA polymerase II transcription subunit 13 (Fragment) OS=Homo sapiens OX=9606 GN=MED13L PE=1 SV=1;tr|A0A3B3IRX3|A0A3B3IRX3_HUMAN Mediator of RNA polymerase II transcription subunit 13 OS=Homo sapiens OX=9606 GN=ME	Homo sapiens	3	1	1	0.7	175.59	1605	0.0027285	6.1889	671830	671830	20	0.0666066			90
lcl|NC_017825.1_prot_YP_006272969.1_21		pVIII	pVIII	lcl|NC_017825.1_prot_YP_006272969.1_21 [locus_tag=YOE_gp21] [db_xref=GeneID:12657124] [protein=pVIII] [protein_id=YP_006272969.1] [location=26455..27138] [gbkey=CDS]	Human Adenovirus C5	1	11	11	69.2	24.757	227	0	323.31	60021000	671750	21	0.0665986			359
U3KQK0;Q99879;Q99877;Q93079;Q5QNW6;Q16778;P62807;P58876;P57053;P33778;P23527;P06899;O60814;Q99880;Q8N257	Histone H2B;Histone H2B type 1-M;Histone H2B type 1-N;Histone H2B type 1-H;Histone H2B type 2-F;Histone H2B type 2-E;Histone H2B type 1-C/E/F/G/I;Histone H2B type 1-D;Histone H2B type F-S;Histone H2B type 1-B;Histone H2B type 1-O;Histone H2B type 1-J;Histone H2B type 1-K;Histone H2B type 1-L;Histone H2B type 3-B	HIST1H2BN;HIST1H2BM;HIST1H2BH;HIST2H2BF;HIST2H2BE;HIST1H2BC;HIST1H2BD;H2BFS;HIST1H2BB;HIST1H2BO;HIST1H2BJ;HIST1H2BK;HIST1H2BL;HIST3H2BB	HIST1H2BN	tr|U3KQK0|U3KQK0_HUMAN Histone H2B OS=Homo sapiens OX=9606 GN=H2BC15 PE=1 SV=1;sp|Q99879|H2B1M_HUMAN Histone H2B type 1-M OS=Homo sapiens OX=9606 GN=H2BC14 PE=1 SV=3;sp|Q99877|H2B1N_HUMAN Histone H2B type 1-N OS=Homo sapiens OX=9606 GN=H2BC15 PE=1 SV=3;sp|	Homo sapiens	15	2	2	13.3	18.804	166	0	40.736	1583800	645720	22	0.064018			405
D6RBM7;D6R9F2;D6RA14		TXK	TXK	tr|D6RBM7|D6RBM7_HUMAN Tyrosine-protein kinase TXK OS=Homo sapiens OX=9606 GN=TXK PE=4 SV=1;tr|D6R9F2|D6R9F2_HUMAN Tyrosine-protein kinase TXK OS=Homo sapiens OX=9606 GN=TXK PE=4 SV=1;tr|D6RA14|D6RA14_HUMAN Tyrosine-protein kinase TXK OS=Homo sapiens OX=96	Homo sapiens	3	1	1	22.9	5.7686	48	0.0014599	6.6657	619610	619610	23	0.0614294			204
A0A2R8YEY5;D6RDJ3				tr|A0A2R8YEY5|A0A2R8YEY5_HUMAN DNA-directed RNA polymerases I and III subunit RPAC1 OS=Homo sapiens OX=9606 GN=POLR1C PE=1 SV=1	Homo sapiens	2	5	1	28.2	32.917	291	0.0040377	6.136	563440	563440	24	0.0558606			85
A0A0C4DGB6;CON__P02768-1;P02768;H0YA55;D6RHD5;B7WNR0;C9JKR2;A0A087WWT3;H7C013	Serum albumin	ALB	ALB	tr|A0A0C4DGB6|A0A0C4DGB6_HUMAN Albumin OS=Homo sapiens OX=9606 GN=ALB PE=1 SV=1;;sp|P02768|ALBU_HUMAN Albumin OS=Homo sapiens OX=9606 GN=ALB PE=1 SV=2;tr|H0YA55|H0YA55_HUMAN Albumin (Fragment) OS=Homo sapiens OX=9606 GN=ALB PE=1 SV=1;tr|D6RHD5|D6RHD5_HUMAN	con_Homo sapiens	9	14	11	29.3	69.226	604	0	98.684	4080800	491500	25	0.0487283		+	49
A0A1W2PPY4;Q9ULH0	Kinase D-interacting substrate of 220 kDa	KIDINS220	KIDINS220	tr|A0A1W2PPY4|A0A1W2PPY4_HUMAN Kinase D-interacting substrate of 220 kDa (Fragment) OS=Homo sapiens OX=9606 GN=KIDINS220 PE=1 SV=1;sp|Q9ULH0|KDIS_HUMAN Kinase D-interacting substrate of 220 kDa OS=Homo sapiens OX=9606 GN=KIDINS220 PE=1 SV=3	Homo sapiens	2	1	1	3.7	29.393	269	0	6.7698	431960	431960	26	0.0428254			69
P61626;F8VV32;A0A0B4J259	Lysozyme C;Lysozyme	LYZ	LYZ	sp|P61626|LYSC_HUMAN Lysozyme C OS=Homo sapiens OX=9606 GN=LYZ PE=1 SV=1;tr|F8VV32|F8VV32_HUMAN 1,4-beta-N-acetylmuramidase C OS=Homo sapiens OX=9606 GN=LYZ PE=1 SV=1;tr|A0A0B4J259|A0A0B4J259_HUMAN 1,4-beta-N-acetylmuramidase C OS=Homo sapiens OX=9606 GN=L	Homo sapiens	3	2	2	27	16.537	148	0	49.444	1593100	407860	27	0.0404361			599
CON__P02535-1				>P02535-1 SWISS-PROT:P02535-1 Tax_Id=10090 Gene_Symbol=Krt10 Isoform 1 of Keratin, type I cytoskeletal 10	con	1	10	1	15.6	57.769	570	0	6.9077	658930	351130	28	0.0348117		+	183
Q86TJ2	Transcriptional adapter 2-beta	TADA2B	TADA2B	sp|Q86TJ2|TAD2B_HUMAN Transcriptional adapter 2-beta OS=Homo sapiens OX=9606 GN=TADA2B PE=1 SV=2	Homo sapiens	1	1	1	1.7	48.47	420	0.007762	5.94	8739300	347010	29	0.0344033			730
lcl|NC_017825.1_prot_YP_006272956.1_8		52/55kDa	52/55kDa	lcl|NC_017825.1_prot_YP_006272956.1_8 [locus_tag=YOE_gp08] [db_xref=GeneID:12657142] [protein=52/55kDa] [protein_id=YP_006272956.1] [location=10827..12017] [gbkey=CDS]	Human Adenovirus C5	1	21	21	51	44.84	396	0	323.31	310220000	271610	30	0.026928			348
CON__P02666				>P02666 SWISS-PROT:P02666 Beta-casein - Bos taurus (Bovine).	con_Bos taurus	1	1	1	9.1	23.583	209	0	14.036	409630	250150	31	0.0248004		+	187
C9JX77		PFKFB4	PFKFB4	tr|C9JX77|C9JX77_HUMAN 6-phosphofructo-2-kinase/fructose-2,6-bisphosphatase 4 (Fragment) OS=Homo sapiens OX=9606 GN=PFKFB4 PE=1 SV=1	Homo sapiens	1	2	2	10.3	20.191	175	0	10.791	236120	236120	32	0.0234094			178
P60709;P63261;E7EVS6;A0A2R8Y793;A0A6Q8PFE4;I3L4N8;I3L3I0;I3L1U9;A5A3E0;G5E9R0;A0A6Q8PH58;A0A2R8YEA7;A0A2R8YGF8;C9JUM1;C9JZR7;K7EM38;I3L3R2;J3KT65;A0A2R8YFE2;C9JTX5;F8WCH0;Q562R1;A0A6Q8PGD7	Actin, cytoplasmic 1;Actin, cytoplasmic 1, N-terminally processed;Actin, cytoplasmic 2;Actin, cytoplasmic 2, N-terminally processed	ACTB;ACTG1	ACTB	sp|P60709|ACTB_HUMAN Actin, cytoplasmic 1 OS=Homo sapiens OX=9606 GN=ACTB PE=1 SV=1;sp|P63261|ACTG_HUMAN Actin, cytoplasmic 2 OS=Homo sapiens OX=9606 GN=ACTG1 PE=1 SV=1;tr|E7EVS6|E7EVS6_HUMAN Actin, cytoplasmic 1 OS=Homo sapiens OX=9606 GN=ACTB PE=1 SV=9;t	Homo sapiens	23	18	6	58.1	41.736	375	0	323.31	274100000	210770	33	0.0208962			591
CON__Q5D862;Q5D862	Filaggrin-2	FLG2	FLG2	;sp|Q5D862|FILA2_HUMAN Filaggrin-2 OS=Homo sapiens OX=9606 GN=FLG2 PE=1 SV=1	con_Homo sapiens	2	4	4	3.5	248.07	2391	0	33.58	1606700	209860	34	0.0208059		+	199
CON__Q14CN4-1;CON__Q6IME9;CON__Q3SY84;CON__Q7RTS7;CON__Q32MB2;F8W1S1;Q14CN4;Q3SY84;Q7RTS7;Q86Y46;H0YIG3	Keratin, type II cytoskeletal 72;Keratin, type II cytoskeletal 71;Keratin, type II cytoskeletal 74;Keratin, type II cytoskeletal 73	KRT74;KRT72;KRT71;KRT73	KRT74	;;;;;tr|F8W1S1|F8W1S1_HUMAN Keratin, type II cytoskeletal 74 OS=Homo sapiens OX=9606 GN=KRT74 PE=1 SV=1;sp|Q14CN4|K2C72_HUMAN Keratin, type II cytoskeletal 72 OS=Homo sapiens OX=9606 GN=KRT72 PE=1 SV=2;sp|Q3SY84|K2C71_HUMAN Keratin, type II cytoskeletal 71	con_Homo sapiens	11	3	1	4.1	55.877	511	0	53.555	880580	195150	35	0.0193476		+	198
A0A087WYI3;P41439	Folate receptor gamma	FOLR3	FOLR3	tr|A0A087WYI3|A0A087WYI3_HUMAN Folate receptor gamma (Fragment) OS=Homo sapiens OX=9606 GN=FOLR3 PE=1 SV=1;sp|P41439|FOLR3_HUMAN Folate receptor gamma OS=Homo sapiens OX=9606 GN=FOLR3 PE=1 SV=2	Homo sapiens	2	1	1	13.5	20.624	178	1	-2	193120	193120	36	0.0191463	+		26
Q02413	Desmoglein-1	DSG1	DSG1	sp|Q02413|DSG1_HUMAN Desmoglein-1 OS=Homo sapiens OX=9606 GN=DSG1 PE=1 SV=2	Homo sapiens	1	9	9	12.3	113.75	1049	0	154.66	2395700	185160	37	0.0183571			638
E9PP36;E9PKZ0;E9PKU4;P62917	60S ribosomal protein L8	RPL8	RPL8	tr|E9PP36|E9PP36_HUMAN 60S ribosomal protein L8 OS=Homo sapiens OX=9606 GN=RPL8 PE=1 SV=1;tr|E9PKZ0|E9PKZ0_HUMAN 60S ribosomal protein L8 (Fragment) OS=Homo sapiens OX=9606 GN=RPL8 PE=1 SV=1;tr|E9PKU4|E9PKU4_HUMAN 60S ribosomal protein L8 (Fragment) OS=Hom	Homo sapiens	4	1	1	7.4	16.18	148	0	8.688	296390	154470	38	0.0153145			246
K7EMA7;H7BY10;K7ERT8;A8MUS3;P62750	60S ribosomal protein L23a	RPL23A	RPL23A	tr|K7EMA7|K7EMA7_HUMAN 60S ribosomal protein L23a OS=Homo sapiens OX=9606 GN=RPL23A PE=1 SV=1;tr|H7BY10|H7BY10_HUMAN 60S ribosomal protein L23a (Fragment) OS=Homo sapiens OX=9606 GN=RPL23A PE=1 SV=1;tr|K7ERT8|K7ERT8_HUMAN 60S ribosomal protein L23a (Fragme	Homo sapiens	5	1	1	24.3	7.9232	70	0	15.79	115150	115150	39	0.0114162			130
A0A5F9ZHX5;Q12873	Chromodomain-helicase-DNA-binding protein 3	CHD3	CHD3	tr|A0A5F9ZHX5|A0A5F9ZHX5_HUMAN DNA helicase (Fragment) OS=Homo sapiens OX=9606 GN=CHD3 PE=1 SV=1;sp|Q12873|CHD3_HUMAN Chromodomain-helicase-DNA-binding protein 3 OS=Homo sapiens OX=9606 GN=CHD3 PE=1 SV=3	Homo sapiens	2	2	1	1.9	155.13	1357	0	7.194	863350	113350	40	0.0112377			108
E9PI01;E9PLL7;Q96JM7	Lethal(3)malignant brain tumor-like protein 3	L3MBTL3	L3MBTL3	tr|E9PI01|E9PI01_HUMAN Lethal(3)malignant brain tumor-like protein 3 (Fragment) OS=Homo sapiens OX=9606 GN=L3MBTL3 PE=1 SV=1;tr|E9PLL7|E9PLL7_HUMAN Lethal(3)malignant brain tumor-like protein 3 (Fragment) OS=Homo sapiens OX=9606 GN=L3MBTL3 PE=1 SV=1;sp|Q96	Homo sapiens	3	1	1	12.3	17.804	163	1	-2	112610	112610	41	0.0111644	+		238
F8VUA6;F8VYV2;A0A075B7A0;G3V203;H0YHA7;J3QQ67;Q07020	60S ribosomal protein L18	RPL18	RPL18	tr|F8VUA6|F8VUA6_HUMAN 60S ribosomal protein L18 (Fragment) OS=Homo sapiens OX=9606 GN=RPL18 PE=1 SV=1;tr|F8VYV2|F8VYV2_HUMAN 60S ribosomal protein L18 OS=Homo sapiens OX=9606 GN=RPL18 PE=1 SV=1;tr|A0A075B7A0|A0A075B7A0_HUMAN 60S ribosomal protein L18 OS=H	Homo sapiens	7	1	1	10	14.529	130	0	81.779	483110	106490	42	0.0105576			4
A0A0C4DG53		RORA	RORA	tr|A0A0C4DG53|A0A0C4DG53_HUMAN Nuclear receptor ROR-alpha OS=Homo sapiens OX=9606 GN=RORA PE=1 SV=1	Homo sapiens	1	1	1	1.9	53.54	468	1	-2	103720	103720	43	0.010283	+		47
C9JER0;C9J370;A0A0J9YWR1;Q6PJE2	POM121 and ZP3 fusion protein	POMZP3	POMZP3	tr|C9JER0|C9JER0_HUMAN POM121 and ZP3 fusion protein OS=Homo sapiens OX=9606 GN=POMZP3 PE=4 SV=1;tr|C9J370|C9J370_HUMAN POM121 and ZP3 fusion protein (Fragment) OS=Homo sapiens OX=9606 GN=POMZP3 PE=4 SV=1;tr|A0A0J9YWR1|A0A0J9YWR1_HUMAN POM121 and ZP3 fusio	Homo sapiens	4	1	1	5.8	17.274	154	1	-2	102600	102600	44	0.010172	+		58
A0A6Q8PHC2;Q9UHD8;K7EQ08;K7EKN4;K7EN52;K7ENQ5;K7EJZ2;K7ER52;K7EIE4;K7ER14;K7EQD7;K7EK18;K7EL40	Septin-9	2009-09-01	2009-09-01	tr|A0A6Q8PHC2|A0A6Q8PHC2_HUMAN Septin-9 OS=Homo sapiens OX=9606 GN=SEPTIN9 PE=1 SV=1;sp|Q9UHD8|SEPT9_HUMAN Septin-9 OS=Homo sapiens OX=9606 GN=SEPTIN9 PE=1 SV=2;tr|K7EQ08|K7EQ08_HUMAN Septin-9 OS=Homo sapiens OX=9606 GN=SEPTIN9 PE=1 SV=1;tr|K7EKN4|K7EKN4_H	Homo sapiens	13	2	2	14.8	33.229	290	0	11.969	101460	101460	45	0.0100589			119
E7EPB3;P50914	60S ribosomal protein L14	RPL14	RPL14	tr|E7EPB3|E7EPB3_HUMAN 60S ribosomal protein L14 OS=Homo sapiens OX=9606 GN=RPL14 PE=1 SV=1;sp|P50914|RL14_HUMAN 60S ribosomal protein L14 OS=Homo sapiens OX=9606 GN=RPL14 PE=1 SV=4	Homo sapiens	2	3	3	28.2	14.558	124	0	37.26	1380000	98530	46	0.00976846			220
H7C265;S4R381;H7BXU9;E7EVR7;D2CGD1;A0A5S6RJB7;F8W9L4;A0A0A0MR25;P22607;P21802	Receptor protein-tyrosine kinase;Fibroblast growth factor receptor;Fibroblast growth factor receptor 3;Fibroblast growth factor receptor 2	FGFR2;FGFR3	FGFR2	tr|H7C265|H7C265_HUMAN Fibroblast growth factor receptor 2 (Fragment) OS=Homo sapiens OX=9606 GN=FGFR2 PE=1 SV=1;tr|S4R381|S4R381_HUMAN Receptor protein-tyrosine kinase OS=Homo sapiens OX=9606 GN=FGFR2 PE=1 SV=1;tr|H7BXU9|H7BXU9_HUMAN Receptor protein-tyro	Homo sapiens	10	1	1	5.1	41.889	371	1	-2	92421	92421	47	0.0091628	+		35
J3QS39;J3QTR3;F5H6Q2;F5GYU3;F5H2Z3;F5H265;B4DV12;F5H388;F5H747;F5GXK7;J3QKN0;Q5PY61;Q96C32;P62987;P62979;P0CG47;P0CG48;M0R1V7;M0R1M6;M0R2S1;A0A2R8Y422;J3QSA3;F5GZ39	Ubiquitin-60S ribosomal protein L40;Ubiquitin;60S ribosomal protein L40;Ubiquitin-40S ribosomal protein S27a;Ubiquitin;40S ribosomal protein S27a;Polyubiquitin-B;Ubiquitin;Polyubiquitin-C;Ubiquitin	UBB;RPS27A;UBC;UBA52	UBB	tr|J3QS39|J3QS39_HUMAN Polyubiquitin-B (Fragment) OS=Homo sapiens OX=9606 GN=UBB PE=1 SV=1;tr|J3QTR3|J3QTR3_HUMAN Ubiquitin-40S ribosomal protein S27a (Fragment) OS=Homo sapiens OX=9606 GN=RPS27A PE=1 SV=1;tr|F5H6Q2|F5H6Q2_HUMAN Polyubiquitin-C (Fragment)	Homo sapiens	23	4	4	50.5	10.469	93	0	159.93	27110000	90359	48	0.00895837			148
Q5JR95;P62241	40S ribosomal protein S8	RPS8	RPS8	tr|Q5JR95|Q5JR95_HUMAN 40S ribosomal protein S8 OS=Homo sapiens OX=9606 GN=RPS8 PE=1 SV=1;sp|P62241|RS8_HUMAN 40S ribosomal protein S8 OS=Homo sapiens OX=9606 GN=RPS8 PE=1 SV=2	Homo sapiens	2	7	7	35.6	21.879	188	0	201.13	3853200	85416	49	0.00846831			605
C9J0E4;P01040	Cystatin-A;Cystatin-A, N-terminally processed	CSTA	CSTA	tr|C9J0E4|C9J0E4_HUMAN Cystatin-A OS=Homo sapiens OX=9606 GN=CSTA PE=1 SV=1;sp|P01040|CYTA_HUMAN Cystatin-A OS=Homo sapiens OX=9606 GN=CSTA PE=1 SV=1	Homo sapiens	2	2	2	52.4	7.0861	63	0	14.212	613100	79516	50	0.00788337			165
A8MUD9;P18124	60S ribosomal protein L7	RPL7	RPL7	tr|A8MUD9|A8MUD9_HUMAN 60S ribosomal protein L7 OS=Homo sapiens OX=9606 GN=RPL7 PE=1 SV=1;sp|P18124|RL7_HUMAN 60S ribosomal protein L7 OS=Homo sapiens OX=9606 GN=RPL7 PE=1 SV=1	Homo sapiens	2	1	1	5.3	24.433	208	0	22.417	622510	78045	51	0.00773754			129
CON__Q7Z794;Q7Z794;F8VS61	Keratin, type II cytoskeletal 1b	KRT77	KRT77	;sp|Q7Z794|K2C1B_HUMAN Keratin, type II cytoskeletal 1b OS=Homo sapiens OX=9606 GN=KRT77 PE=1 SV=3;tr|F8VS61|F8VS61_HUMAN Keratin, type II cytoskeletal 1b OS=Homo sapiens OX=9606 GN=KRT77 PE=1 SV=1	con_Homo sapiens	3	6	3	10.4	61.802	578	0	35.027	310050	65522	52	0.00649598		+	201
E7ETK0;A0A2R8Y849;A0A2R8YD14;P62847;A0A2R8Y8A0	40S ribosomal protein S24	RPS24	RPS24	tr|E7ETK0|E7ETK0_HUMAN 40S ribosomal protein S24 OS=Homo sapiens OX=9606 GN=RPS24 PE=1 SV=1;tr|A0A2R8Y849|A0A2R8Y849_HUMAN 40S ribosomal protein S24 OS=Homo sapiens OX=9606 GN=RPS24 PE=1 SV=1;tr|A0A2R8YD14|A0A2R8YD14_HUMAN 40S ribosomal protein S24 OS=Homo	Homo sapiens	5	2	2	15.3	15.197	131	0	14.062	491210	47422	53	0.00470151			83
P68363;C9JDS9	Tubulin alpha-1B chain	TUBA1B	TUBA1B	sp|P68363|TBA1B_HUMAN Tubulin alpha-1B chain OS=Homo sapiens OX=9606 GN=TUBA1B PE=1 SV=1	Homo sapiens	2	24	0	70.3	50.151	451	0	323.31	610420000	46176	54	0.00457798			629
A0A0U1RR32;A0A0U1RRH7;Q99878;Q96KK5;Q9BTM1;Q16777;Q6FI13;P20671;P0C0S8;H0YFX9;Q93077;Q7L7L0;P04908;C9J0D1;A0A494C189;A0A3B3IS11;Q71UI9;P0C0S5;Q8IUE6;Q96QV6;P16104	Histone H2A type 1-J;Histone H2A type 1-H;Histone H2A.J;Histone H2A type 2-C;Histone H2A type 2-A;Histone H2A type 1-D;Histone H2A type 1;Histone H2A;Histone H2A type 1-C;Histone H2A type 3;Histone H2A type 1-B/E	HIST1H2AJ;HIST1H2AH;H2AFJ;HIST2H2AC;HIST2H2AA3;HIST1H2AD;HIST1H2AG;HIST1H2AC;HIST3H2A;HIST1H2AB	HIST1H2AJ	tr|A0A0U1RR32|A0A0U1RR32_HUMAN Histone H2A OS=Homo sapiens OX=9606 GN=hCG_2039566 PE=3 SV=1;tr|A0A0U1RRH7|A0A0U1RRH7_HUMAN Histone H2A OS=Homo sapiens OX=9606 PE=3 SV=1;sp|Q99878|H2A1J_HUMAN Histone H2A type 1-J OS=Homo sapiens OX=9606 GN=H2AC14 PE=1 SV=3;	Homo sapiens	21	3	3	23.1	18.481	169	0	29.746	1558100	45972	55	0.00455776			62
Q5T8U3;P62424;Q5T8U2	60S ribosomal protein L7a	RPL7A	RPL7A	tr|Q5T8U3|Q5T8U3_HUMAN 60S ribosomal protein L7a (Fragment) OS=Homo sapiens OX=9606 GN=RPL7A PE=1 SV=1;sp|P62424|RL7A_HUMAN 60S ribosomal protein L7a OS=Homo sapiens OX=9606 GN=RPL7A PE=1 SV=2;tr|Q5T8U2|Q5T8U2_HUMAN 60S ribosomal protein L7a OS=Homo sapien	Homo sapiens	3	2	2	12.6	21.545	191	0	15.238	171530	42191	56	0.0041829			611
CON__Q8N1N4-2;CON__Q7RTT2;Q8N1N4	Keratin, type II cytoskeletal 78	KRT78	KRT78	;;sp|Q8N1N4|K2C78_HUMAN Keratin, type II cytoskeletal 78 OS=Homo sapiens OX=9606 GN=KRT78 PE=1 SV=2	con_Homo sapiens	3	3	3	6.5	56.964	521	0	21.843	335200	27802	57	0.00275635		+	200
Q12981	Vesicle transport protein SEC20	BNIP1	BNIP1	sp|Q12981|SEC20_HUMAN Vesicle transport protein SEC20 OS=Homo sapiens OX=9606 GN=BNIP1 PE=1 SV=3	Homo sapiens	1	1	1	8.3	26.132	228	1	-2	26498	26498	58	0.00262706	+		658
lcl|NC_017825.1_prot_YP_006272964.1_16		endoprotease	endoprotease	lcl|NC_017825.1_prot_YP_006272964.1_16 [locus_tag=YOE_gp16] [db_xref=GeneID:12657119] [protein=endoprotease] [protein_id=YP_006272964.1] [location=21146..21775] [gbkey=CDS]	Human Adenovirus C5	1	10	10	59.8	23.84	209	0	279.09	9295800	21875	59	0.00216873			355
H0Y843;A4FU69;K7EJC3	EF-hand calcium-binding domain-containing protein 5	EFCAB5	EFCAB5	tr|H0Y843|H0Y843_HUMAN EF-hand calcium-binding domain-containing protein 5 (Fragment) OS=Homo sapiens OX=9606 GN=EFCAB5 PE=1 SV=1;sp|A4FU69|EFCB5_HUMAN EF-hand calcium-binding domain-containing protein 5 OS=Homo sapiens OX=9606 GN=EFCAB5 PE=1 SV=3;tr|K7EJC	Homo sapiens	3	2	2	3.6	136.76	1185	0	11.613	402290	19021	60	0.00188578			123
lcl|NC_017825.1_prot_YP_006272960.1_12;REV__lcl|NC_017825.1_prot_YP_006272960.1_12		pV	pV	lcl|NC_017825.1_prot_YP_006272960.1_12 [locus_tag=YOE_gp12] [db_xref=GeneID:12657115] [protein=pV] [protein_id=YP_006272960.1] [location=16119..17141] [gbkey=CDS]	Human Adenovirus C5	2	28	28	76.2	38.899	340	0	323.31	485420000	0	61	0			352
Q5T749	Keratinocyte proline-rich protein	KPRP	KPRP	sp|Q5T749|KPRP_HUMAN Keratinocyte proline-rich protein OS=Homo sapiens OX=9606 GN=KPRP PE=1 SV=1	Homo sapiens	1	6	6	16.6	64.135	579	0	43.696	1414100	0	61	0			714
CON__Q86YZ3;Q86YZ3	Hornerin	HRNR	HRNR	;sp|Q86YZ3|HORN_HUMAN Hornerin OS=Homo sapiens OX=9606 GN=HRNR PE=1 SV=2	con_Homo sapiens	2	3	3	2.5	282.39	2850	0	20.922	1133000	0	61	0		+	202
CON__P02769				>P02769 SWISS-PROT:P02769 (Bos taurus) Bovine serum albumin precursor	con_Bos taurus	1	5	2	7.4	69.293	607	0	14.597	824760	0	61	0		+	189
Q01469	Fatty acid-binding protein, epidermal	FABP5	FABP5	sp|Q01469|FABP5_HUMAN Fatty acid-binding protein 5 OS=Homo sapiens OX=9606 GN=FABP5 PE=1 SV=3	Homo sapiens	1	1	1	6.7	15.164	135	0.0028369	6.3987	726940	0	61	0			636
A0A286YEY1;P01876;A0A0G2JMB2	Ig alpha-1 chain C region	IGHA1	IGHA1	tr|A0A286YEY1|A0A286YEY1_HUMAN Immunoglobulin heavy constant alpha 1 (Fragment) OS=Homo sapiens OX=9606 GN=IGHA1 PE=1 SV=1;sp|P01876|IGHA1_HUMAN Immunoglobulin heavy constant alpha 1 OS=Homo sapiens OX=9606 GN=IGHA1 PE=1 SV=2	Homo sapiens	3	3	3	9.5	42.848	398	0	17.513	615000	0	61	0			72
E7EQB2;E7ER44;P02788	Lactotransferrin;Lactoferricin-H;Kaliocin-1;Lactoferroxin-A;Lactoferroxin-B;Lactoferroxin-C	LTF	LTF	tr|E7EQB2|E7EQB2_HUMAN Lactotransferrin (Fragment) OS=Homo sapiens OX=9606 GN=LTF PE=1 SV=1;tr|E7ER44|E7ER44_HUMAN Lactotransferrin OS=Homo sapiens OX=9606 GN=LTF PE=1 SV=1;sp|P02788|TRFL_HUMAN Lactotransferrin OS=Homo sapiens OX=9606 GN=LTF PE=1 SV=6	Homo sapiens	3	6	6	15.2	76.625	696	0	64.403	427980	0	61	0			222
A0A0A0MS07;A0A0A0MS08;P01857	Ig gamma-1 chain C region	IGHG1	IGHG1	tr|A0A0A0MS07|A0A0A0MS07_HUMAN Immunoglobulin heavy constant gamma 1 (Fragment) OS=Homo sapiens OX=9606 GN=IGHG1 PE=1 SV=1;tr|A0A0A0MS08|A0A0A0MS08_HUMAN Immunoglobulin heavy constant gamma 1 (Fragment) OS=Homo sapiens OX=9606 GN=IGHG1 PE=1 SV=1;sp|P01857|	Homo sapiens	3	4	2	20.3	31.983	295	0	23.605	395400	0	61	0			38
CON__Q04695;Q04695;CON__Q9QWL7;F5GWP8;K7EPJ9;K7ESE1	Keratin, type I cytoskeletal 17	KRT17	KRT17	;sp|Q04695|K1C17_HUMAN Keratin, type I cytoskeletal 17 OS=Homo sapiens OX=9606 GN=KRT17 PE=1 SV=2;;tr|F5GWP8|F5GWP8_HUMAN Keratin, type I cytoskeletal 17 OS=Homo sapiens OX=9606 GN=KRT17 PE=1 SV=2;tr|K7EPJ9|K7EPJ9_HUMAN Keratin, type I cytoskeletal 17 (Fra	con_Homo sapiens	6	12	3	27.5	48.105	432	0	26.759	310580	0	61	0		+	196
P25311	Zinc-alpha-2-glycoprotein	AZGP1	AZGP1	sp|P25311|ZA2G_HUMAN Zinc-alpha-2-glycoprotein OS=Homo sapiens OX=9606 GN=AZGP1 PE=1 SV=2	Homo sapiens	1	1	1	3.4	34.258	298	0.0053121	6.061	303600	0	61	0			502
P04406;E7EUT5	Glyceraldehyde-3-phosphate dehydrogenase	GAPDH	GAPDH	sp|P04406|G3P_HUMAN Glyceraldehyde-3-phosphate dehydrogenase OS=Homo sapiens OX=9606 GN=GAPDH PE=1 SV=3;tr|E7EUT5|E7EUT5_HUMAN Glyceraldehyde-3-phosphate dehydrogenase OS=Homo sapiens OX=9606 GN=GAPDH PE=1 SV=1	Homo sapiens	2	19	19	74.6	36.053	335	0	323.31	112780000	0	61	0			429
P14923;C9JTX4;C9J826;C9JK18;C9JKY1	Junction plakoglobin	JUP	JUP	sp|P14923|PLAK_HUMAN Junction plakoglobin OS=Homo sapiens OX=9606 GN=JUP PE=1 SV=3	Homo sapiens	5	6	6	9	81.744	745	0	66.034	495550	0	61	0			476
CON__P04259				>P04259 SWISS-PROT:P04259 Tax_Id=9606 Gene_Symbol=KRT6B Keratin, type II cytoskeletal 6B	con	1	26	0	42.2	59.998	564	0	39.049	266740	0	61	0		+	190
CON__P02662				>P02662 SWISS-PROT:P02662 Alpha-S1-casein - Bos taurus (Bovine).	con_Bos taurus	1	2	2	11.1	22.975	199	0	23.175	592930	0	61	0		+	185
CON__P02538;P02538;CON__O95678;O95678;CON__Q8VED5	Keratin, type II cytoskeletal 6A	KRT6A	KRT6A	;sp|P02538|K2C6A_HUMAN Keratin, type II cytoskeletal 6A OS=Homo sapiens OX=9606 GN=KRT6A PE=1 SV=3	con_Homo sapiens	5	26	1	42.2	60.044	564	1	-2	225310	0	61	0	+	+	184
P01834;A0A5H1ZRQ3	Ig kappa chain C region	IGKC	IGKC	sp|P01834|IGKC_HUMAN Immunoglobulin kappa constant OS=Homo sapiens OX=9606 GN=IGKC PE=1 SV=2;tr|A0A5H1ZRQ3|A0A5H1ZRQ3_HUMAN Immunoglobulin kappa constant (Fragment) OS=Homo sapiens OX=9606 GN=IGKC PE=1 SV=1	Homo sapiens	2	3	3	48.6	11.765	107	0	23.309	221480	0	61	0			422
A0A5F9ZH78;P05089	Arginase-1	ARG1	ARG1	tr|A0A5F9ZH78|A0A5F9ZH78_HUMAN Arginase-1 OS=Homo sapiens OX=9606 GN=ARG1 PE=1 SV=1;sp|P05089|ARGI1_HUMAN Arginase-1 OS=Homo sapiens OX=9606 GN=ARG1 PE=1 SV=2	Homo sapiens	2	2	2	9.3	25.66	237	0	14.127	211690	0	61	0			106
CON__P02754				>P02754 SWISS-PROT:P02754 Beta-lactoglobulin - Bos taurus (Bovine).	con_Bos taurus	1	1	1	8.6	18.281	162	0	34.629	196040	0	61	0		+	188
P05109	Protein S100-A8;Protein S100-A8, N-terminally processed	S100A8	S100A8	sp|P05109|S10A8_HUMAN Protein S100-A8 OS=Homo sapiens OX=9606 GN=S100A8 PE=1 SV=1	Homo sapiens	1	1	1	11.8	10.834	93	0	11.835	348310	0	61	0			430
P81605	Dermcidin;Survival-promoting peptide;DCD-1	DCD	DCD	sp|P81605|DCD_HUMAN Dermcidin OS=Homo sapiens OX=9606 GN=DCD PE=1 SV=2	Homo sapiens	1	2	2	12.7	11.284	110	0	19.999	439910	0	61	0			634
P31944	Caspase-14;Caspase-14 subunit p17, mature form;Caspase-14 subunit p10, mature form;Caspase-14 subunit p20, intermediate form;Caspase-14 subunit p8, intermediate form	CASP14	CASP14	sp|P31944|CASPE_HUMAN Caspase-14 OS=Homo sapiens OX=9606 GN=CASP14 PE=1 SV=2	Homo sapiens	1	3	3	14	27.679	242	0	24.753	333810	0	61	0			529
CON__P02663				>P02663 SWISS-PROT:P02663 Alpha-S2-casein [Contains: Casocidin-1 - Bos taurus (Bovine).	con_Bos taurus	1	1	1	3.9	24.348	207	0.0052562	6.0047	151390	0	61	0		+	186
A0A590UK99;A0A590UIX5;A0A590UJF8;A0A590UJZ9;A0A590UJ76;Q9UGM3	Deleted in malignant brain tumors 1 protein	DMBT1	DMBT1	tr|A0A590UK99|A0A590UK99_HUMAN Deleted in malignant brain tumors 1 protein (Fragment) OS=Homo sapiens OX=9606 GN=DMBT1 PE=1 SV=1;tr|A0A590UIX5|A0A590UIX5_HUMAN Deleted in malignant brain tumors 1 protein (Fragment) OS=Homo sapiens OX=9606 GN=DMBT1 PE=1 SV=	Homo sapiens	6	1	1	10.8	13.783	130	0	7.5009	100890	0	61	0			102
CON__Q6KB66-1;CON__Q0VBK2;Q6KB66	Keratin, type II cytoskeletal 80	KRT80	KRT80	;;sp|Q6KB66|K2C80_HUMAN Keratin, type II cytoskeletal 80 OS=Homo sapiens OX=9606 GN=KRT80 PE=1 SV=2	con_Homo sapiens	3	1	1	2.2	50.525	452	0	8.2898	100110	0	61	0		+	197
P12273	Prolactin-inducible protein	PIP	PIP	sp|P12273|PIP_HUMAN Prolactin-inducible protein OS=Homo sapiens OX=9606 GN=PIP PE=1 SV=1	Homo sapiens	1	1	1	6.8	16.572	146	0.002805	6.375	99611	0	61	0			460
P04040	Catalase	CAT	CAT	sp|P04040|CATA_HUMAN Catalase OS=Homo sapiens OX=9606 GN=CAT PE=1 SV=3	Homo sapiens	1	1	1	2.5	59.755	527	0.0040268	6.1322	93086	0	61	0			425
P15924	Desmoplakin	DSP	DSP	sp|P15924|DESP_HUMAN Desmoplakin OS=Homo sapiens OX=9606 GN=DSP PE=1 SV=3	Homo sapiens	1	6	6	2.3	331.77	2871	0	34.276	501170	0	61	0			477
Q2L6G8;G8JLG2;Q15517	Corneodesmosin	CDSN	CDSN	tr|Q2L6G8|Q2L6G8_HUMAN Corneodesmosin OS=Homo sapiens OX=9606 GN=CDSN PE=1 SV=1;tr|G8JLG2|G8JLG2_HUMAN Corneodesmosin OS=Homo sapiens OX=9606 GN=CDSN PE=1 SV=1;sp|Q15517|CDSN_HUMAN Corneodesmosin OS=Homo sapiens OX=9606 GN=CDSN PE=1 SV=3	Homo sapiens	3	2	2	4.3	51.539	529	0	11.505	194760	0	61	0			284
A0A494C0J7;Q08188	Protein-glutamine gamma-glutamyltransferase E;Protein-glutamine gamma-glutamyltransferase E 50 kDa catalytic chain;Protein-glutamine gamma-glutamyltransferase E 27 kDa non-catalytic chain	TGM3	TGM3	tr|A0A494C0J7|A0A494C0J7_HUMAN TGc domain-containing protein OS=Homo sapiens OX=9606 PE=3 SV=1;sp|Q08188|TGM3_HUMAN Protein-glutamine gamma-glutamyltransferase E OS=Homo sapiens OX=9606 GN=TGM3 PE=1 SV=4	Homo sapiens	2	1	1	2.2	78.856	712	0	8.7427	86273	0	61	0			96
P03973	Antileukoproteinase	SLPI	SLPI	sp|P03973|SLPI_HUMAN Antileukoproteinase OS=Homo sapiens OX=9606 GN=SLPI PE=1 SV=2	Homo sapiens	1	1	1	9.1	14.326	132	0.002809	6.382	83049	0	61	0			424
H0YMM1;H0YKS4;H0YMD0;H0YMU9;H0YN42;P07355;H0YLE2;H0YN52;H0YNA0;H0YN28;H0YL33;H0YNP5;H0YM50;A6NMY6;H0YMD9;H0YKV8;H0YKL9;H0YKZ7;H0YLV6;H0YMT9;H0YKX9;H0YMW4	Annexin;Annexin A2;Putative annexin A2-like protein	ANXA2;ANXA2P2	ANXA2	tr|H0YMM1|H0YMM1_HUMAN Annexin (Fragment) OS=Homo sapiens OX=9606 GN=ANXA2 PE=1 SV=1;tr|H0YKS4|H0YKS4_HUMAN Annexin (Fragment) OS=Homo sapiens OX=9606 GN=ANXA2 PE=1 SV=1;tr|H0YMD0|H0YMD0_HUMAN Annexin (Fragment) OS=Homo sapiens OX=9606 GN=ANXA2 PE=1 SV=1;t	Homo sapiens	22	3	3	26.8	16.458	149	0	62.306	80185	0	61	0			297
J3KRG2;Q96QA5	Gasdermin-A	GSDMA	GSDMA	tr|J3KRG2|J3KRG2_HUMAN Gasdermin-A (Fragment) OS=Homo sapiens OX=9606 GN=GSDMA PE=1 SV=8;sp|Q96QA5|GSDMA_HUMAN Gasdermin-A OS=Homo sapiens OX=9606 GN=GSDMA PE=1 SV=4	Homo sapiens	2	1	1	5.1	17.791	158	0.0040431	6.1483	79510	0	61	0			324
E9PC84;J3QSU6;P24821;F5H7V9;H0YGZ3	Tenascin	TNC	TNC	tr|E9PC84|E9PC84_HUMAN Tenascin OS=Homo sapiens OX=9606 GN=TNC PE=1 SV=1;tr|J3QSU6|J3QSU6_HUMAN Tenascin OS=Homo sapiens OX=9606 GN=TNC PE=1 SV=1;sp|P24821|TENA_HUMAN Tenascin OS=Homo sapiens OX=9606 GN=TNC PE=1 SV=3;tr|F5H7V9|F5H7V9_HUMAN Tenascin OS=Homo	Homo sapiens	5	7	7	4.7	210.85	1928	0	56.712	1693900	0	61	0			232
U3KQB1;E5RH64;Q969T7	7-methylguanosine phosphate-specific 5-nucleotidase	NT5C3B	NT5C3B	tr|U3KQB1|U3KQB1_HUMAN 7-methylguanosine phosphate-specific 5-nucleotidase (Fragment) OS=Homo sapiens OX=9606 GN=NT5C3B PE=1 SV=1;tr|E5RH64|E5RH64_HUMAN 7-methylguanosine phosphate-specific 5-nucleotidase OS=Homo sapiens OX=9606 GN=NT5C3B PE=1 SV=1;sp|Q9	Homo sapiens	3	1	1	7.6	12.009	105	0.007732	5.9015	43091	0	61	0			216
O15018	PDZ domain-containing protein 2;Processed PDZ domain-containing protein 2	PDZD2	PDZD2	sp|O15018|PDZD2_HUMAN PDZ domain-containing protein 2 OS=Homo sapiens OX=9606 GN=PDZD2 PE=1 SV=4	Homo sapiens	1	1	1	0.3	301.64	2839	1	-2	715230	0	61	0	+		389
P07900;G3V2J8;Q14568;Q58FG0;Q58FG1	Heat shock protein HSP 90-alpha	HSP90AA1	HSP90AA1	sp|P07900|HS90A_HUMAN Heat shock protein HSP 90-alpha OS=Homo sapiens OX=9606 GN=HSP90AA1 PE=1 SV=5	Homo sapiens	5	63	41	64.2	84.659	732	0	323.31	3449100000	0	61	0			442
lcl|NC_017825.1_prot_YP_006272966.1_18		100kDa	100kDa	lcl|NC_017825.1_prot_YP_006272966.1_18 [locus_tag=YOE_gp18] [db_xref=GeneID:12657121] [protein=100kDa] [protein_id=YP_006272966.1] [location=23419..25827] [gbkey=CDS]	Human Adenovirus C5	1	51	51	61.2	88.74	802	0	323.31	1775200000	0	61	0			357
P08238;Q58FF7	Heat shock protein HSP 90-beta	HSP90AB1	HSP90AB1	sp|P08238|HS90B_HUMAN Heat shock protein HSP 90-beta OS=Homo sapiens OX=9606 GN=HSP90AB1 PE=1 SV=4	Homo sapiens	2	63	33	67.1	83.263	724	0	323.31	1289600000	0	61	0			443
P55072;C9IZA5;C9JUP7	Transitional endoplasmic reticulum ATPase	VCP	VCP	sp|P55072|TERA_HUMAN Transitional endoplasmic reticulum ATPase OS=Homo sapiens OX=9606 GN=VCP PE=1 SV=4	Homo sapiens	3	55	55	74.1	89.321	806	0	323.31	1028700000	0	61	0			584
P08670;B0YJC4;B0YJC5;A0A1B0GTT5;P17661;H7C5W5;P41219;A0A1B0GVG8;E7EMV2;E7ESP9;Q16352;P07197;F8W835;P12036	Vimentin	VIM	VIM	sp|P08670|VIME_HUMAN Vimentin OS=Homo sapiens OX=9606 GN=VIM PE=1 SV=4;tr|B0YJC4|B0YJC4_HUMAN Vimentin OS=Homo sapiens OX=9606 GN=VIM PE=1 SV=1;tr|B0YJC5|B0YJC5_HUMAN Vimentin OS=Homo sapiens OX=9606 GN=VIM PE=1 SV=1	Homo sapiens	14	52	50	77.9	53.651	466	0	323.31	805160000	0	61	0			445
P62258;B4DJF2;I3L3T1;K7EIT4;K7EM20;I3L0W5	14-3-3 protein epsilon	YWHAE	YWHAE	sp|P62258|1433E_HUMAN 14-3-3 protein epsilon OS=Homo sapiens OX=9606 GN=YWHAE PE=1 SV=1	Homo sapiens	6	26	24	89	29.174	255	0	323.31	783190000	0	61	0			606
P14625;Q96GW1;A0A1W2PRR1;H0YIV0;Q58FF3;F8W026	Endoplasmin	HSP90B1	HSP90B1	sp|P14625|ENPL_HUMAN Endoplasmin OS=Homo sapiens OX=9606 GN=HSP90B1 PE=1 SV=1	Homo sapiens	6	48	46	57.2	92.468	803	0	323.31	598000000	0	61	0			474
Q08380;K7EP36;K7ESM3;K7EKQ5;K7EJY8;K7ERZ6;K7EJD3	Galectin-3-binding protein	LGALS3BP	LGALS3BP	sp|Q08380|LG3BP_HUMAN Galectin-3-binding protein OS=Homo sapiens OX=9606 GN=LGALS3BP PE=1 SV=1	Homo sapiens	7	16	16	35.7	65.33	585	0	323.31	350720000	0	61	0			646
P68371;Q3ZCM7;M0R2D3;M0QY85;M0QZL7;M0QYM7;M0R0X0;M0QY37;M0QX14;M0R042;M0R2T4;A0A075B724	Tubulin beta-4B chain	TUBB4B	TUBB4B	sp|P68371|TBB4B_HUMAN Tubulin beta-4B chain OS=Homo sapiens OX=9606 GN=TUBB4B PE=1 SV=1	Homo sapiens	12	26	1	73.9	49.83	445	0	323.31	321740000	0	61	0			631
P63104;B0AZS6;E7EX29;B7Z2E6;H0YB80;E7ESK7;E5RIR4;E9PD24;E7EVZ2;E5RGE1	14-3-3 protein zeta/delta	YWHAZ	YWHAZ	sp|P63104|1433Z_HUMAN 14-3-3 protein zeta/delta OS=Homo sapiens OX=9606 GN=YWHAZ PE=1 SV=1;tr|B0AZS6|B0AZS6_HUMAN 14-3-3 protein zeta/delta OS=Homo sapiens OX=9606 GN=YWHAZ PE=1 SV=1;tr|E7EX29|E7EX29_HUMAN 14-3-3 protein zeta/delta (Fragment) OS=Homo sapie	Homo sapiens	10	22	18	77.6	27.745	245	0	323.31	306050000	0	61	0			620
lcl|NC_017825.1_prot_YP_006272965.1_17		DNA binding	DNA binding	lcl|NC_017825.1_prot_YP_006272965.1_17 [locus_tag=YOE_gp17] [db_xref=GeneID:12657120] [protein=DNA binding protein] [protein_id=YP_006272965.1] [location=complement(21852..23390)] [gbkey=CDS]	Human Adenovirus C5	1	23	23	51.4	57.286	512	0	323.31	284790000	0	61	0			356
O43707;F5GXS2;H7C144;K7EJH8;A0A494C1A0;P35609;A0A087WSZ2;Q08043;G3V5M4;F6THM6;G3V2E8;G3V2X9;A0A494C033;A0A494C166;A0A494C060;A0A494C0Q3;K7EP19;M0QZQ3;C9JY79;Q9H254	Alpha-actinin-4	ACTN4	ACTN4	sp|O43707|ACTN4_HUMAN Alpha-actinin-4 OS=Homo sapiens OX=9606 GN=ACTN4 PE=1 SV=2;tr|F5GXS2|F5GXS2_HUMAN Alpha-actinin-4 OS=Homo sapiens OX=9606 GN=ACTN4 PE=1 SV=2	Homo sapiens	20	43	31	56.5	104.85	911	0	323.31	240290000	0	61	0			399
lcl|NC_017825.1_prot_YP_006272973.1_25		fiber	fiber	lcl|NC_017825.1_prot_YP_006272973.1_25 [locus_tag=YOE_gp25] [db_xref=GeneID:12657128] [protein=fiber] [protein_id=YP_006272973.1] [location=32290..33621] [gbkey=CDS]	Human Adenovirus C5	1	20	20	53.5	47.304	443	0	323.31	179080000	0	61	0			360
P05388;F8VWS0;F8VU65;F8VW21;F8VPE8;G3V210;F8VZS0;Q8NHW5;F8W1K8;F8VQY6;F8VRK7;F8VWV4;F8VS58	60S acidic ribosomal protein P0;60S acidic ribosomal protein P0-like	RPLP0;RPLP0P6	RPLP0	sp|P05388|RLA0_HUMAN 60S acidic ribosomal protein P0 OS=Homo sapiens OX=9606 GN=RPLP0 PE=1 SV=1;tr|F8VWS0|F8VWS0_HUMAN 60S acidic ribosomal protein P0 OS=Homo sapiens OX=9606 GN=RPLP0 PE=1 SV=1;tr|F8VU65|F8VU65_HUMAN 60S acidic ribosomal protein P0 (Fragme	Homo sapiens	13	18	18	65	34.273	317	0	323.31	176730000	0	61	0			435
Q5JP53;P07437;Q5ST81;A0A075B736;Q5SQY0;A6NNZ2;G3V2A3;CON__ENSEMBL:ENSBTAP00000025008;Q9H4B7;G3V5W4;G3V2R8;G3V3R4;G3V2N6	Tubulin beta chain	TUBB	TUBB	tr|Q5JP53|Q5JP53_HUMAN Tubulin beta chain OS=Homo sapiens OX=9606 GN=TUBB PE=1 SV=1;sp|P07437|TBB5_HUMAN Tubulin beta chain OS=Homo sapiens OX=9606 GN=TUBB PE=1 SV=2;tr|Q5ST81|Q5ST81_HUMAN Tubulin beta chain OS=Homo sapiens OX=9606 GN=TUBB PE=1 SV=1	Homo sapiens	13	26	6	74.2	47.766	426	0	323.31	144480000	0	61	0			439
P07237;H7BZ94;I3L398;I3L312;H0Y3Z3;I3L4M2;I3NI03;I3L3U6;I3L0S0;I3L3P5;I3L1Y5;I3L514	Protein disulfide-isomerase	P4HB	P4HB	sp|P07237|PDIA1_HUMAN Protein disulfide-isomerase OS=Homo sapiens OX=9606 GN=P4HB PE=1 SV=3;tr|H7BZ94|H7BZ94_HUMAN Protein disulfide-isomerase OS=Homo sapiens OX=9606 GN=P4HB PE=1 SV=2;tr|I3L398|I3L398_HUMAN Protein disulfide-isomerase (Fragment) OS=Homo s	Homo sapiens	12	31	31	62.8	57.116	508	0	323.31	141660000	0	61	0			438
Q5VTE0;P68104;A0A087WVQ9;A0A087WV01;A0A2U3TZH3;Q05639;A0A2R8Y488;Q5JR01;A0A2R8Y660;A6PW80;A0A6Q8PFK6;A0A2R8YDN5	Putative elongation factor 1-alpha-like 3;Elongation factor 1-alpha 1;Elongation factor 1-alpha;Elongation factor 1-alpha 2	EEF1A1P5;EEF1A1;EEF1A2	EEF1A1P5	sp|Q5VTE0|EF1A3_HUMAN Putative elongation factor 1-alpha-like 3 OS=Homo sapiens OX=9606 GN=EEF1A1P5 PE=5 SV=1;sp|P68104|EF1A1_HUMAN Elongation factor 1-alpha 1 OS=Homo sapiens OX=9606 GN=EEF1A1 PE=1 SV=1;tr|A0A087WVQ9|A0A087WVQ9_HUMAN Elongation factor 1-a	Homo sapiens	12	15	15	46.5	50.184	462	0	237.78	134780000	0	61	0			628
P49321;Q5T624;H0YDS9;E9PI86;E9PRH9;H0YF33;E9PPR5;E9PPQ8	Nuclear autoantigenic sperm protein	NASP	NASP	sp|P49321|NASP_HUMAN Nuclear autoantigenic sperm protein OS=Homo sapiens OX=9606 GN=NASP PE=1 SV=2	Homo sapiens	8	26	26	49.2	85.237	788	0	323.31	114920000	0	61	0			558
Q04917;A2IDB2;F8WEB6;A2IDB1	14-3-3 protein eta	YWHAH	YWHAH	sp|Q04917|1433F_HUMAN 14-3-3 protein eta OS=Homo sapiens OX=9606 GN=YWHAH PE=1 SV=4;tr|A2IDB2|A2IDB2_HUMAN 14-3-3 protein eta (Fragment) OS=Homo sapiens OX=9606 GN=YWHAH PE=1 SV=1	Homo sapiens	4	19	16	75.2	28.218	246	0	323.31	114260000	0	61	0			643
Q13813;A0A0D9SF54;A0A0D9SGF6;A0A0D9SFF6;A0A0D9SFH4;A0A1B0GTB7;A0A1B0GUH3;A0A1B0GV13;A0A5F9ZHC3	Spectrin alpha chain, non-erythrocytic 1	SPTAN1	SPTAN1	sp|Q13813|SPTN1_HUMAN Spectrin alpha chain, non-erythrocytic 1 OS=Homo sapiens OX=9606 GN=SPTAN1 PE=1 SV=3;tr|A0A0D9SF54|A0A0D9SF54_HUMAN Spectrin alpha chain, non-erythrocytic 1 OS=Homo sapiens OX=9606 GN=SPTAN1 PE=1 SV=1;tr|A0A0D9SGF6|A0A0D9SGF6_HUMAN Sp	Homo sapiens	9	95	95	45.3	284.54	2472	0	323.31	114140000	0	61	0			669
lcl|NC_017825.1_prot_YP_006272953.1_5		IVa2	IVa2	lcl|NC_017825.1_prot_YP_006272953.1_5 [locus_tag=YOE_gp05] [db_xref=GeneID:12657139] [protein=IVa2] [protein_id=YP_006272953.1] [location=complement(join(3978..5311,5590..5602))] [gbkey=CDS]	Human Adenovirus C5	1	21	20	61.2	50.364	448	0	323.31	106680000	0	61	0			345
P27797;K7EJB9;K7EL50	Calreticulin	CALR	CALR	sp|P27797|CALR_HUMAN Calreticulin OS=Homo sapiens OX=9606 GN=CALR PE=1 SV=1;tr|K7EJB9|K7EJB9_HUMAN Calreticulin (Fragment) OS=Homo sapiens OX=9606 GN=CALR PE=1 SV=1	Homo sapiens	3	21	21	64.3	48.141	417	0	323.31	97926000	0	61	0			514
K7EM02;K7EIJ8;Q8IYT4	Katanin p60 ATPase-containing subunit A-like 2	KATNAL2	KATNAL2	tr|K7EM02|K7EM02_HUMAN Katanin p60 ATPase-containing subunit A-like 2 (Fragment) OS=Homo sapiens OX=9606 GN=KATNAL2 PE=1 SV=1;tr|K7EIJ8|K7EIJ8_HUMAN Katanin p60 ATPase-containing subunit A-like 2 (Fragment) OS=Homo sapiens OX=9606 GN=KATNAL2 PE=1 SV=1;sp|Q	Homo sapiens	3	1	1	9.4	13.999	128	0	7.2307	90466000	0	61	0			331
P31946;Q4VY20;Q4VY19;A0A0J9YWE8;A0A0J9YWZ2	14-3-3 protein beta/alpha;14-3-3 protein beta/alpha, N-terminally processed	YWHAB	YWHAB	sp|P31946|1433B_HUMAN 14-3-3 protein beta/alpha OS=Homo sapiens OX=9606 GN=YWHAB PE=1 SV=3	Homo sapiens	5	18	13	81.3	28.082	246	0	323.31	84261000	0	61	0			530
P13667;A0A499FI48	Protein disulfide-isomerase A4	PDIA4	PDIA4	sp|P13667|PDIA4_HUMAN Protein disulfide-isomerase A4 OS=Homo sapiens OX=9606 GN=PDIA4 PE=1 SV=2;tr|A0A499FI48|A0A499FI48_HUMAN Protein disulfide-isomerase OS=Homo sapiens OX=9606 GN=PDIA4 PE=1 SV=1	Homo sapiens	2	32	32	48.2	72.932	645	0	323.31	78922000	0	61	0			467
lcl|NC_017825.1_prot_YP_006272952.1_4		pIX	pIX	lcl|NC_017825.1_prot_YP_006272952.1_4 [locus_tag=YOE_gp04] [db_xref=GeneID:12657138] [protein=pIX] [protein_id=YP_006272952.1] [location=3491..3919] [gbkey=CDS]	Human Adenovirus C5	1	7	7	93	14.459	142	0	323.31	75149000	0	61	0			344
Q14152	Eukaryotic translation initiation factor 3 subunit A	EIF3A	EIF3A	sp|Q14152|EIF3A_HUMAN Eukaryotic translation initiation factor 3 subunit A OS=Homo sapiens OX=9606 GN=EIF3A PE=1 SV=1	Homo sapiens	1	36	36	29.7	166.57	1382	0	323.31	74048000	0	61	0			676
P61981	14-3-3 protein gamma;14-3-3 protein gamma, N-terminally processed	YWHAG	YWHAG	sp|P61981|1433G_HUMAN 14-3-3 protein gamma OS=Homo sapiens OX=9606 GN=YWHAG PE=1 SV=2	Homo sapiens	1	18	14	76.1	28.302	247	0	323.31	73063000	0	61	0			601
Q96FX7	tRNA (adenine(58)-N(1))-methyltransferase catalytic subunit TRMT61A	TRMT61A	TRMT61A	sp|Q96FX7|TRM61_HUMAN tRNA (adenine(58)-N(1))-methyltransferase catalytic subunit TRMT61A OS=Homo sapiens OX=9606 GN=TRMT61A PE=1 SV=1	Homo sapiens	1	2	2	10.7	31.381	289	0	12.063	71166000	0	61	0			758
Q9Y265;E7ETR0;H7C4G5;H7C4I3;J3QLR1	RuvB-like 1	RUVBL1	RUVBL1	sp|Q9Y265|RUVB1_HUMAN RuvB-like 1 OS=Homo sapiens OX=9606 GN=RUVBL1 PE=1 SV=1;tr|E7ETR0|E7ETR0_HUMAN RuvB-like helicase OS=Homo sapiens OX=9606 GN=RUVBL1 PE=1 SV=1	Homo sapiens	5	26	26	68.9	50.227	456	0	323.31	63754000	0	61	0			817
P55884;C9JZG1;C9JQN7	Eukaryotic translation initiation factor 3 subunit B	EIF3B	EIF3B	sp|P55884|EIF3B_HUMAN Eukaryotic translation initiation factor 3 subunit B OS=Homo sapiens OX=9606 GN=EIF3B PE=1 SV=3	Homo sapiens	3	24	24	37	92.48	814	0	323.31	62993000	0	61	0			586
P27824;H0Y9Q7;D6RGY2;D6RFL1;H0Y9H1;D6RAQ8;D6RAU8;D6RB85;D6RDP7;D6RHJ3;D6RD16	Calnexin	CANX	CANX	sp|P27824|CALX_HUMAN Calnexin OS=Homo sapiens OX=9606 GN=CANX PE=1 SV=2	Homo sapiens	11	13	13	28	67.567	592	0	272.76	61392000	0	61	0			515
P67936;A0A2R8Y5V9;A0A2R8YGX3;A0A2R8YE05;K7ENT6;A0A2R8YH90;A0A2R8YHD2;A0A2R8YEU4;A0A5F9UN72;Q5TCU3;CON__Q3SX28;A7XZE4;P07951;K7EPB9;A0A590UJB9;A0A590UK79;U3KQK2	Tropomyosin alpha-4 chain	TPM4	TPM4	sp|P67936|TPM4_HUMAN Tropomyosin alpha-4 chain OS=Homo sapiens OX=9606 GN=TPM4 PE=1 SV=3;tr|A0A2R8Y5V9|A0A2R8Y5V9_HUMAN Tropomyosin alpha-4 chain OS=Homo sapiens OX=9606 GN=TPM4 PE=1 SV=1;tr|A0A2R8YGX3|A0A2R8YGX3_HUMAN Tropomyosin alpha-4 chain OS=Homo sap	Homo sapiens	17	27	20	68.5	28.521	248	0	323.31	55292000	0	61	0			626
P13639	Elongation factor 2	EEF2	EEF2	sp|P13639|EF2_HUMAN Elongation factor 2 OS=Homo sapiens OX=9606 GN=EEF2 PE=1 SV=4	Homo sapiens	1	22	21	38.2	95.337	858	0	323.31	55280000	0	61	0			466
Q58FF8	Putative heat shock protein HSP 90-beta 2	HSP90AB2P	HSP90AB2P	sp|Q58FF8|H90B2_HUMAN Putative heat shock protein HSP 90-beta 2 OS=Homo sapiens OX=9606 GN=HSP90AB2P PE=1 SV=2	Homo sapiens	1	15	2	25.2	44.348	381	0	62.221	55052000	0	61	0			707
P60842;J3KT12;J3KTB5;J3QS69;J3KSZ0;J3QL43;J3QR64;J3KTN0;J3QLN6;E7EQG2;Q14240;J3QKZ9;J3KS25;J3KS93;J3KT04;E7EMV8;J3KSN7;J3QL52	Eukaryotic initiation factor 4A-I	EIF4A1	EIF4A1	sp|P60842|IF4A1_HUMAN Eukaryotic initiation factor 4A-I OS=Homo sapiens OX=9606 GN=EIF4A1 PE=1 SV=1;tr|J3KT12|J3KT12_HUMAN RNA helicase OS=Homo sapiens OX=9606 GN=EIF4A1 PE=1 SV=1;tr|J3KTB5|J3KTB5_HUMAN RNA helicase (Fragment) OS=Homo sapiens OX=9606 GN=EI	Homo sapiens	18	18	17	56.7	46.153	406	0	323.31	52996000	0	61	0			592
P14618;H3BTN5;B4DNK4;H3BQ34;H3BR70;H3BT25;H3BUW1;H3BTJ2;H3BU13;H3BN34;H3BQZ3;P30613	Pyruvate kinase PKM;Pyruvate kinase	PKM	PKM	sp|P14618|KPYM_HUMAN Pyruvate kinase PKM OS=Homo sapiens OX=9606 GN=PKM PE=1 SV=4;tr|H3BTN5|H3BTN5_HUMAN Pyruvate kinase (Fragment) OS=Homo sapiens OX=9606 GN=PKM PE=1 SV=1;tr|B4DNK4|B4DNK4_HUMAN Pyruvate kinase OS=Homo sapiens OX=9606 GN=PKM PE=1 SV=1;tr|	Homo sapiens	12	20	20	46.7	57.936	531	0	323.31	52826000	0	61	0			473
Q15393;I3L4G7;J3QRB2;J3QL37;H3BMB0	Splicing factor 3B subunit 3	SF3B3	SF3B3	sp|Q15393|SF3B3_HUMAN Splicing factor 3B subunit 3 OS=Homo sapiens OX=9606 GN=SF3B3 PE=1 SV=4	Homo sapiens	5	33	33	37.6	135.58	1217	0	323.31	50158000	0	61	0			690
P26641	Elongation factor 1-gamma	EEF1G	EEF1G	sp|P26641|EF1G_HUMAN Elongation factor 1-gamma OS=Homo sapiens OX=9606 GN=EEF1G PE=1 SV=3	Homo sapiens	1	15	15	33.9	50.118	437	0	218.6	48329000	0	61	0			511
O14744;H0YJX6;G3V580;H0YJ77;G3V5L5;G3V2L6;G3V2X6;C9JSX3;G3V5T6;H0YJD3;G3V507;G3V2F5;H7BZ44	Protein arginine N-methyltransferase 5;Protein arginine N-methyltransferase 5, N-terminally processed	PRMT5	PRMT5	sp|O14744|ANM5_HUMAN Protein arginine N-methyltransferase 5 OS=Homo sapiens OX=9606 GN=PRMT5 PE=1 SV=4;tr|H0YJX6|H0YJX6_HUMAN Protein arginine N-methyltransferase 5 (Fragment) OS=Homo sapiens OX=9606 GN=PRMT5 PE=1 SV=1	Homo sapiens	13	20	20	36.7	72.683	637	0	265.81	46516000	0	61	0			383
Q9Y230;M0R0Y3;X6R2L4;M0QXI6;M0R0Z0;M0QXZ7;A0A1W2PS48	RuvB-like 2	RUVBL2	RUVBL2	sp|Q9Y230|RUVB2_HUMAN RuvB-like 2 OS=Homo sapiens OX=9606 GN=RUVBL2 PE=1 SV=3;tr|M0R0Y3|M0R0Y3_HUMAN RuvB-like helicase OS=Homo sapiens OX=9606 GN=RUVBL2 PE=1 SV=1	Homo sapiens	7	30	30	73.2	51.156	463	0	323.31	46226000	0	61	0			815
P60228;E5RGA2;H0YBR5;E5RHS5;E5RIT4;H0YAW4;E5RII3;E5RIP5;E5RJ25;H0YBP5	Eukaryotic translation initiation factor 3 subunit E	EIF3E	EIF3E	sp|P60228|EIF3E_HUMAN Eukaryotic translation initiation factor 3 subunit E OS=Homo sapiens OX=9606 GN=EIF3E PE=1 SV=1;tr|E5RGA2|E5RGA2_HUMAN Eukaryotic translation initiation factor 3 subunit E OS=Homo sapiens OX=9606 GN=EIF3E PE=1 SV=1	Homo sapiens	10	23	23	58.2	52.22	445	0	323.31	45720000	0	61	0			590
C9JIF9;P13798;H7C393;H7C1U0;C9JLK2;F8WEH5;H0YFE5	Acylamino-acid-releasing enzyme	APEH	APEH	tr|C9JIF9|C9JIF9_HUMAN Acyl-peptide hydrolase OS=Homo sapiens OX=9606 GN=APEH PE=1 SV=1;sp|P13798|ACPH_HUMAN Acylamino-acid-releasing enzyme OS=Homo sapiens OX=9606 GN=APEH PE=1 SV=4	Homo sapiens	7	18	18	37.3	81.673	737	0	303.19	41918000	0	61	0			173
Q9Y262;B0QY89;B0QY90;C9JHP4;C9K0Q7;H7C3A0	Eukaryotic translation initiation factor 3 subunit L	EIF3L	EIF3L	sp|Q9Y262|EIF3L_HUMAN Eukaryotic translation initiation factor 3 subunit L OS=Homo sapiens OX=9606 GN=EIF3L PE=1 SV=1;tr|B0QY89|B0QY89_HUMAN Eukaryotic translation initiation factor 3 subunit L OS=Homo sapiens OX=9606 GN=EIF3L PE=1 SV=1;tr|B0QY90|B0QY90_HU	Homo sapiens	6	21	21	43.1	66.726	564	0	323.31	40551000	0	61	0			816
C9J9K3;A0A0C4DG17;P08865;F8WD59	40S ribosomal protein SA	RPSA	RPSA	tr|C9J9K3|C9J9K3_HUMAN 40S ribosomal protein SA (Fragment) OS=Homo sapiens OX=9606 GN=RPSA PE=1 SV=8;tr|A0A0C4DG17|A0A0C4DG17_HUMAN 40S ribosomal protein SA OS=Homo sapiens OX=9606 GN=RPSA PE=1 SV=1;sp|P08865|RSSA_HUMAN 40S ribosomal protein SA OS=Homo sap	Homo sapiens	4	10	10	54.8	29.404	263	0	293.44	40331000	0	61	0			46
Q07021;I3L3Q7;I3L3B0	Complement component 1 Q subcomponent-binding protein, mitochondrial	C1QBP	C1QBP	sp|Q07021|C1QBP_HUMAN Complement component 1 Q subcomponent-binding protein, mitochondrial OS=Homo sapiens OX=9606 GN=C1QBP PE=1 SV=1;tr|I3L3Q7|I3L3Q7_HUMAN Complement component 1 Q subcomponent-binding protein, mitochondrial (Fragment) OS=Homo sapiens OX=	Homo sapiens	3	7	7	42.9	31.362	282	0	323.31	37345000	0	61	0			644
P67809;H0Y449;C9J5V9;P16989;Q9Y2T7;A0A0D9SEI8	Nuclease-sensitive element-binding protein 1	YBX1	YBX1	sp|P67809|YBOX1_HUMAN Y-box-binding protein 1 OS=Homo sapiens OX=9606 GN=YBX1 PE=1 SV=3;tr|H0Y449|H0Y449_HUMAN Y-box-binding protein 1 (Fragment) OS=Homo sapiens OX=9606 GN=YBX1 PE=1 SV=1	Homo sapiens	6	13	13	51.2	35.924	324	0	323.31	36692000	0	61	0			624
Q04837;A0A0G2JLD8;E7EUY5;C9K0U8	Single-stranded DNA-binding protein, mitochondrial	SSBP1	SSBP1	sp|Q04837|SSBP_HUMAN Single-stranded DNA-binding protein, mitochondrial OS=Homo sapiens OX=9606 GN=SSBP1 PE=1 SV=1;tr|A0A0G2JLD8|A0A0G2JLD8_HUMAN Single-stranded DNA-binding protein, mitochondrial (Fragment) OS=Homo sapiens OX=9606 GN=SSBP1 PE=1 SV=1;tr|E7	Homo sapiens	4	14	14	75.7	17.259	148	0	323.31	34863000	0	61	0			642
A0A0U1RQF0;P49327;A0A0U1RRG3;J3KTF0	Fatty acid synthase;[Acyl-carrier-protein] S-acetyltransferase;[Acyl-carrier-protein] S-malonyltransferase;3-oxoacyl-[acyl-carrier-protein] synthase;3-oxoacyl-[acyl-carrier-protein] reductase;3-hydroxyacyl-[acyl-carrier-protein] dehydratase;Enoyl-[acyl-carrier-protein] reductase;Oleoyl-[acyl-carrier-protein] hydrolase	FASN	FASN	tr|A0A0U1RQF0|A0A0U1RQF0_HUMAN 3-hydroxyacyl-[acyl-carrier-protein] dehydratase OS=Homo sapiens OX=9606 GN=FASN PE=1 SV=1;sp|P49327|FAS_HUMAN Fatty acid synthase OS=Homo sapiens OX=9606 GN=FASN PE=1 SV=3	Homo sapiens	4	45	45	24.8	273.2	2509	0	323.31	33412000	0	61	0			60
Q60FE5;P21333;A0A087WWY3;F8WE98;H0Y5F3;H0Y5C6;H7C2E7	Filamin-A	FLNA	FLNA	tr|Q60FE5|Q60FE5_HUMAN Filamin-A OS=Homo sapiens OX=9606 GN=FLNA PE=1 SV=1;sp|P21333|FLNA_HUMAN Filamin-A OS=Homo sapiens OX=9606 GN=FLNA PE=1 SV=4;tr|A0A087WWY3|A0A087WWY3_HUMAN Filamin-A OS=Homo sapiens OX=9606 GN=FLNA PE=1 SV=1	Homo sapiens	7	43	43	27.2	278.22	2620	0	323.31	33311000	0	61	0			492
P11021	78 kDa glucose-regulated protein	HSPA5	HSPA5	sp|P11021|BIP_HUMAN Endoplasmic reticulum chaperone BiP OS=Homo sapiens OX=9606 GN=HSPA5 PE=1 SV=2	Homo sapiens	1	22	21	36.9	72.332	654	0	323.31	32658000	0	61	0			454
Q15029;K7EP67;K7EJ74;K7EIV5;K7EIT3	116 kDa U5 small nuclear ribonucleoprotein component	EFTUD2	EFTUD2	sp|Q15029|U5S1_HUMAN 116 kDa U5 small nuclear ribonucleoprotein component OS=Homo sapiens OX=9606 GN=EFTUD2 PE=1 SV=1	Homo sapiens	5	21	20	33.2	109.43	972	0	323.31	30934000	0	61	0			685
Q7Z6Z7;H0Y659;A0A087X1S3;A5YM72	E3 ubiquitin-protein ligase HUWE1	HUWE1	HUWE1	sp|Q7Z6Z7|HUWE1_HUMAN E3 ubiquitin-protein ligase HUWE1 OS=Homo sapiens OX=9606 GN=HUWE1 PE=1 SV=3	Homo sapiens	4	32	31	11.7	481.89	4374	0	323.31	30808000	0	61	0			728
Q99613;B5ME19;H3BPE3;H3BPE4;H3BTY8	Eukaryotic translation initiation factor 3 subunit C;Eukaryotic translation initiation factor 3 subunit C-like protein	EIF3C;EIF3CL	EIF3C	sp|Q99613|EIF3C_HUMAN Eukaryotic translation initiation factor 3 subunit C OS=Homo sapiens OX=9606 GN=EIF3C PE=1 SV=1;sp|B5ME19|EIFCL_HUMAN Eukaryotic translation initiation factor 3 subunit C-like protein OS=Homo sapiens OX=9606 GN=EIF3CL PE=1 SV=1	Homo sapiens	5	17	17	17.2	105.34	913	0	302.13	28636000	0	61	0			154
P14543	Nidogen-1	NID1	NID1	sp|P14543|NID1_HUMAN Nidogen-1 OS=Homo sapiens OX=9606 GN=NID1 PE=1 SV=3	Homo sapiens	1	20	20	20.4	136.38	1247	0	323.31	28312000	0	61	0			472
Q09028;H0YF10;H0YEU5;H0YCT5;H0YDK2;E9PNS2;C9JPP3;E9PIC4;E9PNS6;Q5JP02	Histone-binding protein RBBP4	RBBP4	RBBP4	sp|Q09028|RBBP4_HUMAN Histone-binding protein RBBP4 OS=Homo sapiens OX=9606 GN=RBBP4 PE=1 SV=3	Homo sapiens	10	7	5	21.2	47.655	425	0	178.88	28299000	0	61	0			650
P27348;E9PG15	14-3-3 protein theta	YWHAQ	YWHAQ	sp|P27348|1433T_HUMAN 14-3-3 protein theta OS=Homo sapiens OX=9606 GN=YWHAQ PE=1 SV=1;tr|E9PG15|E9PG15_HUMAN 14-3-3 protein theta (Fragment) OS=Homo sapiens OX=9606 GN=YWHAQ PE=1 SV=1	Homo sapiens	2	11	9	45.7	27.764	245	0	323.31	28257000	0	61	0			512
E9PK01;P29692;A0A087X1X7;E9PRY8;E9PMW7;E9PPR1;E9PL12;E9PQ49;E9PI39;E9PN91;E9PIZ1;E9PL71;H0YCK7;E9PQZ1;E9PKK3;E9PK72;H0YE58;E9PK06;H0YE72;E9PNW6;E9PQC9;E9PJD0	Elongation factor 1-delta	EEF1D	EEF1D	tr|E9PK01|E9PK01_HUMAN Elongation factor 1-delta (Fragment) OS=Homo sapiens OX=9606 GN=EEF1D PE=1 SV=1;sp|P29692|EF1D_HUMAN Elongation factor 1-delta OS=Homo sapiens OX=9606 GN=EEF1D PE=1 SV=5;tr|A0A087X1X7|A0A087X1X7_HUMAN Elongation factor 1-delta OS=Hom	Homo sapiens	22	10	10	49.8	28.821	261	0	323.31	27073000	0	61	0			243
O00303;H0YDT6;E9PQV8;A0A1W2PP79	Eukaryotic translation initiation factor 3 subunit F	EIF3F	EIF3F	sp|O00303|EIF3F_HUMAN Eukaryotic translation initiation factor 3 subunit F OS=Homo sapiens OX=9606 GN=EIF3F PE=1 SV=1	Homo sapiens	4	10	10	36.7	37.563	357	0	246.16	25406000	0	61	0			377
O43847;G3V1R5;F5H7V1;H0Y5G9	Nardilysin	NRD1	NRD1	sp|O43847|NRDC_HUMAN Nardilysin OS=Homo sapiens OX=9606 GN=NRDC PE=1 SV=3;tr|G3V1R5|G3V1R5_HUMAN Nardilysin OS=Homo sapiens OX=9606 GN=NRDC PE=1 SV=1;tr|F5H7V1|F5H7V1_HUMAN Nardilysin OS=Homo sapiens OX=9606 GN=NRDC PE=1 SV=2	Homo sapiens	4	25	25	24.4	131.7	1151	0	323.31	25241000	0	61	0			401
P23396;E9PL09;E9PPU1;F2Z2S8;H0YCJ7;H0YEU2;H0YF32;E9PQ96;E9PJH4;E9PK82;E9PSF4;E9PQX2;H0YES8	40S ribosomal protein S3	RPS3	RPS3	sp|P23396|RS3_HUMAN 40S ribosomal protein S3 OS=Homo sapiens OX=9606 GN=RPS3 PE=1 SV=2;tr|E9PL09|E9PL09_HUMAN 40S ribosomal protein S3 OS=Homo sapiens OX=9606 GN=RPS3 PE=1 SV=1;tr|E9PPU1|E9PPU1_HUMAN 40S ribosomal protein S3 OS=Homo sapiens OX=9606 GN=RPS3	Homo sapiens	13	15	15	55.1	26.688	243	0	201.98	25020000	0	61	0			498
P12270	Nucleoprotein TPR	TPR	TPR	sp|P12270|TPR_HUMAN Nucleoprotein TPR OS=Homo sapiens OX=9606 GN=TPR PE=1 SV=3	Homo sapiens	1	36	36	20.4	267.29	2363	0	323.31	24624000	0	61	0			459
B8ZZQ6;P06454	Prothymosin alpha;Prothymosin alpha, N-terminally processed;Thymosin alpha-1	PTMA	PTMA	tr|B8ZZQ6|B8ZZQ6_HUMAN Prothymosin alpha OS=Homo sapiens OX=9606 GN=PTMA PE=1 SV=1;sp|P06454|PTMA_HUMAN Prothymosin alpha OS=Homo sapiens OX=9606 GN=PTMA PE=1 SV=2	Homo sapiens	2	3	3	17.8	11.758	107	0	55.349	24431000	0	61	0			161
A0A2R8YF43;A0A2R8YD58;E7EU96;P68400;A0A2R8Y5A0;A0A2R8YDP2;A0A2R8YFU2;Q8NEV1;A0A2R8Y4D6;A0A2R8Y4H0;V9GYA2;A0A2R8YEW1;A0A2R8YDY7;A0A2R8Y3W6;A0A2R8Y797;A0A2R8YEL7;V9GY80;A0A2R8YF47;A0A2R8YCK2;A0A2R8Y7T1;A0A087WY74;A0A2R8YCC9	Casein kinase II subunit alpha;Casein kinase II subunit alpha 3	CSNK2A1;CSNK2A3	CSNK2A1	tr|A0A2R8YF43|A0A2R8YF43_HUMAN Casein kinase II subunit alpha OS=Homo sapiens OX=9606 GN=CSNK2A1 PE=1 SV=1;tr|A0A2R8YD58|A0A2R8YD58_HUMAN Casein kinase II subunit alpha OS=Homo sapiens OX=9606 GN=CSNK2A1 PE=1 SV=1;tr|E7EU96|E7EU96_HUMAN Casein kinase II su	Homo sapiens	22	14	14	51.2	41.79	363	0	323.31	23455000	0	61	0			84
P11142;E9PKE3;E9PN89;E9PNE6;A8K7Q2;E9PLF4;P54652;E9PI65;E9PQQ4;E9PQK7;E9PK54;E9PPY6;E9PN25;E9PS65;E9PM13	Heat shock cognate 71 kDa protein	HSPA8	HSPA8	sp|P11142|HSP7C_HUMAN Heat shock cognate 71 kDa protein OS=Homo sapiens OX=9606 GN=HSPA8 PE=1 SV=1;tr|E9PKE3|E9PKE3_HUMAN Heat shock cognate 71 kDa protein OS=Homo sapiens OX=9606 GN=HSPA8 PE=1 SV=1;tr|E9PN89|E9PN89_HUMAN Heat shock cognate 71 kDa protein	Homo sapiens	15	20	16	37.8	70.897	646	0	323.31	23040000	0	61	0			456
O75643;A0A494C1A5	U5 small nuclear ribonucleoprotein 200 kDa helicase	SNRNP200	SNRNP200	sp|O75643|U520_HUMAN U5 small nuclear ribonucleoprotein 200 kDa helicase OS=Homo sapiens OX=9606 GN=SNRNP200 PE=1 SV=2;tr|A0A494C1A5|A0A494C1A5_HUMAN U5 small nuclear ribonucleoprotein 200 kDa helicase (Fragment) OS=Homo sapiens OX=9606 GN=SNRNP200 PE=1 SV	Homo sapiens	2	47	47	26.5	244.5	2136	0	323.31	22203000	0	61	0			412
K7ELL7;P14314;K7EPW7;K7EKX1;K7EJ70	Glucosidase 2 subunit beta	PRKCSH	PRKCSH	tr|K7ELL7|K7ELL7_HUMAN Glucosidase 2 subunit beta OS=Homo sapiens OX=9606 GN=PRKCSH PE=1 SV=1;sp|P14314|GLU2B_HUMAN Glucosidase 2 subunit beta OS=Homo sapiens OX=9606 GN=PRKCSH PE=1 SV=2	Homo sapiens	5	15	13	32.7	60.192	535	0	232.01	22082000	0	61	0			338
P12532;C9JSQ1;F8WCN3;C9J995;C9J8F6;C9JJX8;C9J6W7;C9JT96;P17540	Creatine kinase U-type, mitochondrial	CKMT1A	CKMT1A	sp|P12532|KCRU_HUMAN Creatine kinase U-type, mitochondrial OS=Homo sapiens OX=9606 GN=CKMT1A PE=1 SV=1	Homo sapiens	9	10	10	27.3	47.036	417	0	323.31	20653000	0	61	0			462
Q7L2H7;J3KNJ2;E9PN86;H0YCQ8;E9PRI2;E9PRY0;E7ESM3	Eukaryotic translation initiation factor 3 subunit M	EIF3M	EIF3M	sp|Q7L2H7|EIF3M_HUMAN Eukaryotic translation initiation factor 3 subunit M OS=Homo sapiens OX=9606 GN=EIF3M PE=1 SV=1;tr|J3KNJ2|J3KNJ2_HUMAN Eukaryotic translation initiation factor 3 subunit M (Fragment) OS=Homo sapiens OX=9606 GN=EIF3M PE=1 SV=1	Homo sapiens	7	12	12	44.7	42.502	374	0	323.31	20552000	0	61	0			726
A0A0G2JIW1;P0DMV9;P0DMV8;V9GZ37	Heat shock 70 kDa protein 1B;Heat shock 70 kDa protein 1A	HSPA1B;HSPA1A	HSPA1B	tr|A0A0G2JIW1|A0A0G2JIW1_HUMAN Heat shock 70 kDa protein 1B OS=Homo sapiens OX=9606 GN=HSPA1B PE=1 SV=1;sp|P0DMV9|HS71B_HUMAN Heat shock 70 kDa protein 1B OS=Homo sapiens OX=9606 GN=HSPA1B PE=1 SV=1;sp|P0DMV8|HS71A_HUMAN Heat shock 70 kDa protein 1A OS=Hom	Homo sapiens	4	18	10	39.4	70.108	642	0	323.31	20188000	0	61	0			55
G3V4W0;B4DY08;B2R5W2;G3V4C1;G3V576;G3V2Q1;P07910;G3V5X6;G3V3K6;G3V251;B4DSU6;G3V555;G3V575;G3V4M8;A0A0G2JPF8;A0A0G2JNQ3;P0DMR1;O60812;B7ZW38;B2RXH8;G3V2D6;G3V2H6;G3V5V7	Heterogeneous nuclear ribonucleoproteins C1/C2	HNRNPC	HNRNPC	tr|G3V4W0|G3V4W0_HUMAN Heterogeneous nuclear ribonucleoproteins C1/C2 (Fragment) OS=Homo sapiens OX=9606 GN=HNRNPC PE=1 SV=1;tr|B4DY08|B4DY08_HUMAN Heterogeneous nuclear ribonucleoproteins C1/C2 OS=Homo sapiens OX=9606 GN=HNRNPC PE=1 SV=1;tr|B2R5W2|B2R5W2_	Homo sapiens	23	11	11	40.8	28.916	262	0	254.97	19895000	0	61	0			139
A8MZ84;A0A0G2JNK8;A0A0G2JMI0		LAIR1	LAIR1	tr|A8MZ84|A8MZ84_HUMAN Leukocyte-associated immunoglobulin-like receptor 1 OS=Homo sapiens OX=9606 GN=LAIR1 PE=1 SV=2;tr|A0A0G2JNK8|A0A0G2JNK8_HUMAN Leukocyte-associated immunoglobulin-like receptor 1 OS=Homo sapiens OX=9606 GN=LAIR1 PE=1 SV=1;tr|A0A0G2JMI	Homo sapiens	3	1	1	3.7	29.69	269	1	-2	19735000	0	61	0	+		57
Q13347;Q5TFK1	Eukaryotic translation initiation factor 3 subunit I	EIF3I	EIF3I	sp|Q13347|EIF3I_HUMAN Eukaryotic translation initiation factor 3 subunit I OS=Homo sapiens OX=9606 GN=EIF3I PE=1 SV=1	Homo sapiens	2	15	15	65.2	36.501	325	0	194.52	18808000	0	61	0			666
V9GYY3;A0A384N5Y3;F5H2F4;P11586;V9GZ78;A0A494C1T2	C-1-tetrahydrofolate synthase, cytoplasmic;Methylenetetrahydrofolate dehydrogenase;Methenyltetrahydrofolate cyclohydrolase;Formyltetrahydrofolate synthetase;C-1-tetrahydrofolate synthase, cytoplasmic, N-terminally processed	MTHFD1	MTHFD1	tr|V9GYY3|V9GYY3_HUMAN C-1-tetrahydrofolate synthase, cytoplasmic OS=Homo sapiens OX=9606 GN=MTHFD1 PE=1 SV=2;tr|A0A384N5Y3|A0A384N5Y3_HUMAN C-1-tetrahydrofolate synthase, cytoplasmic OS=Homo sapiens OX=9606 GN=MTHFD1 PE=1 SV=1;tr|F5H2F4|F5H2F4_HUMAN C-1-t	Homo sapiens	6	21	21	28.3	99.719	922	0	323.31	18674000	0	61	0			86
P06748;E5RI98;E5RGW4	Nucleophosmin	NPM1	NPM1	sp|P06748|NPM_HUMAN Nucleophosmin OS=Homo sapiens OX=9606 GN=NPM1 PE=1 SV=2	Homo sapiens	3	8	8	38.1	32.575	294	0	223.89	17481000	0	61	0			436
O15371;B0QYA5;B0QYA4;A0A0D9SGB5;B0QYA6	Eukaryotic translation initiation factor 3 subunit D	EIF3D	EIF3D	sp|O15371|EIF3D_HUMAN Eukaryotic translation initiation factor 3 subunit D OS=Homo sapiens OX=9606 GN=EIF3D PE=1 SV=1	Homo sapiens	5	13	13	33.8	63.972	548	0	235.37	16406000	0	61	0			393
A0A1X7SBZ2;A0A5H1ZRQ2;Q92841;A0A0U1RQJ0	Probable ATP-dependent RNA helicase DDX17	DDX17	DDX17	tr|A0A1X7SBZ2|A0A1X7SBZ2_HUMAN RNA helicase OS=Homo sapiens OX=9606 GN=DDX17 PE=1 SV=1;tr|A0A5H1ZRQ2|A0A5H1ZRQ2_HUMAN RNA helicase OS=Homo sapiens OX=9606 GN=DDX17 PE=1 SV=1;sp|Q92841|DDX17_HUMAN Probable ATP-dependent RNA helicase DDX17 OS=Homo sapiens OX	Homo sapiens	4	12	7	18.8	80.253	729	0	143.13	15790000	0	61	0			70
A0A087WVQ6;Q00610;J3KS13;A0A087WX41;P53675;J3KSQ2;K7EJJ5;J3QL20;F5H5N6	Clathrin heavy chain;Clathrin heavy chain 1	CLTC	CLTC	tr|A0A087WVQ6|A0A087WVQ6_HUMAN Clathrin heavy chain OS=Homo sapiens OX=9606 GN=CLTC PE=1 SV=1;sp|Q00610|CLH1_HUMAN Clathrin heavy chain 1 OS=Homo sapiens OX=9606 GN=CLTC PE=1 SV=5	Homo sapiens	9	28	28	21.5	192.06	1679	0	323.31	15315000	0	61	0			16
O00148;K7EQN7	ATP-dependent RNA helicase DDX39A	DDX39A	DDX39A	sp|O00148|DX39A_HUMAN ATP-dependent RNA helicase DDX39A OS=Homo sapiens OX=9606 GN=DDX39A PE=1 SV=2;tr|K7EQN7|K7EQN7_HUMAN RNA helicase (Fragment) OS=Homo sapiens OX=9606 GN=DDX39A PE=1 SV=1	Homo sapiens	2	7	1	19.7	49.129	427	0	140.19	15303000	0	61	0			370
P17987;E7EQR6;F5H282;E7ERF2;F5H136;F5GZ03;F5H726;F5GZI8;F5H676;F5H7Y1;F5GYL4	T-complex protein 1 subunit alpha	TCP1	TCP1	sp|P17987|TCPA_HUMAN T-complex protein 1 subunit alpha OS=Homo sapiens OX=9606 GN=TCP1 PE=1 SV=1;tr|E7EQR6|E7EQR6_HUMAN T-complex protein 1 subunit alpha OS=Homo sapiens OX=9606 GN=TCP1 PE=1 SV=1;tr|F5H282|F5H282_HUMAN T-complex protein 1 subunit alpha OS=	Homo sapiens	11	18	18	45.1	60.343	556	0	323.31	15302000	0	61	0			482
P22314;Q5JRR6;Q5JRR9;Q5JRS0;Q5JRS1;Q5JRS3;Q5JRS2	Ubiquitin-like modifier-activating enzyme 1	UBA1	UBA1	sp|P22314|UBA1_HUMAN Ubiquitin-like modifier-activating enzyme 1 OS=Homo sapiens OX=9606 GN=UBA1 PE=1 SV=3	Homo sapiens	7	11	11	16.5	117.85	1058	0	323.31	15252000	0	61	0			495
lcl|NC_017825.1_prot_YP_006272967.1_19;lcl|NC_017825.1_prot_YP_006272968.1_20		33K	33K	lcl|NC_017825.1_prot_YP_006272967.1_19 [locus_tag=YOE_gp19] [db_xref=GeneID:12657122] [protein=33K] [protein_id=YP_006272967.1] [location=join(25544..25871,26041..26372)] [gbkey=CDS]	Human Adenovirus C5	2	7	7	29.2	24.662	219	0	183.7	15013000	0	61	0			358
P52597;A0A1B0GW42	Heterogeneous nuclear ribonucleoprotein F;Heterogeneous nuclear ribonucleoprotein F, N-terminally processed	HNRNPF	HNRNPF	sp|P52597|HNRPF_HUMAN Heterogeneous nuclear ribonucleoprotein F OS=Homo sapiens OX=9606 GN=HNRNPF PE=1 SV=3	Homo sapiens	2	6	4	23.4	45.671	415	0	323.31	14757000	0	61	0			573
P12956;B1AHC9	X-ray repair cross-complementing protein 6	XRCC6	XRCC6	sp|P12956|XRCC6_HUMAN X-ray repair cross-complementing protein 6 OS=Homo sapiens OX=9606 GN=XRCC6 PE=1 SV=2;tr|B1AHC9|B1AHC9_HUMAN ATP-dependent DNA helicase 2 subunit 1 OS=Homo sapiens OX=9606 GN=XRCC6 PE=1 SV=1	Homo sapiens	2	15	15	32.5	69.842	609	0	323.31	14708000	0	61	0			464
Q08211	ATP-dependent RNA helicase A	DHX9	DHX9	sp|Q08211|DHX9_HUMAN ATP-dependent RNA helicase A OS=Homo sapiens OX=9606 GN=DHX9 PE=1 SV=4	Homo sapiens	1	21	21	21.3	140.96	1270	0	323.31	14677000	0	61	0			645
P61163;R4GMT0;A0A1B0GVS3	Alpha-centractin	ACTR1A	ACTR1A	sp|P61163|ACTZ_HUMAN Alpha-centractin OS=Homo sapiens OX=9606 GN=ACTR1A PE=1 SV=1;tr|R4GMT0|R4GMT0_HUMAN Alpha-centractin OS=Homo sapiens OX=9606 GN=ACTR1A PE=1 SV=1	Homo sapiens	3	10	7	40.7	42.613	376	0	315.31	13681000	0	61	0			597
O75821;K7ER90;K7EL20;K7ENA8;K7EP16;K7EL60	Eukaryotic translation initiation factor 3 subunit G	EIF3G	EIF3G	sp|O75821|EIF3G_HUMAN Eukaryotic translation initiation factor 3 subunit G OS=Homo sapiens OX=9606 GN=EIF3G PE=1 SV=2;tr|K7ER90|K7ER90_HUMAN Eukaryotic translation initiation factor 3 subunit G (Fragment) OS=Homo sapiens OX=9606 GN=EIF3G PE=1 SV=1;tr|K7EL2	Homo sapiens	6	10	10	41.9	35.611	320	0	221.37	13680000	0	61	0			413
A0A1W2PP35;A0A1X7SBS1;A0A1W2PPS1;Q00839;A0A1W2PRZ7;A0A1W2PQ74;A0A1W2PQL0;A0A1W2PP34;A0A1W2PPL4;A0A1W2PPH7;Q5RI18;A0A1W2PQD4;A0A1W2PPE9;A0A1W2PP22	Heterogeneous nuclear ribonucleoprotein U	HNRNPU	HNRNPU	tr|A0A1W2PP35|A0A1W2PP35_HUMAN Heterogeneous nuclear ribonucleoprotein U (Fragment) OS=Homo sapiens OX=9606 GN=HNRNPU PE=1 SV=1;tr|A0A1X7SBS1|A0A1X7SBS1_HUMAN Heterogeneous nuclear ribonucleoprotein U OS=Homo sapiens OX=9606 GN=HNRNPU PE=1 SV=1;tr|A0A1W2PP	Homo sapiens	14	7	7	12.2	80.648	728	0	202.73	13215000	0	61	0			68
B3KS98;O15372;A0A087WZK9;E5RJT0;E5RGU4;E5RFW7;E5RFH0	Eukaryotic translation initiation factor 3 subunit H	EIF3H	EIF3H	tr|B3KS98|B3KS98_HUMAN Eukaryotic translation initiation factor 3 subunit H OS=Homo sapiens OX=9606 GN=EIF3H PE=1 SV=1;sp|O15372|EIF3H_HUMAN Eukaryotic translation initiation factor 3 subunit H OS=Homo sapiens OX=9606 GN=EIF3H PE=1 SV=1;tr|A0A087WZK9|A0A08	Homo sapiens	7	12	12	40.2	41.581	366	0	233.26	12878000	0	61	0			143
P25205;J3KQ69;A0A499FHX9;Q7Z6P5	DNA replication licensing factor MCM3	MCM3	MCM3	sp|P25205|MCM3_HUMAN DNA replication licensing factor MCM3 OS=Homo sapiens OX=9606 GN=MCM3 PE=1 SV=3;tr|J3KQ69|J3KQ69_HUMAN DNA helicase OS=Homo sapiens OX=9606 GN=MCM3 PE=1 SV=3;tr|A0A499FHX9|A0A499FHX9_HUMAN DNA helicase OS=Homo sapiens OX=9606 GN=MCM3 P	Homo sapiens	4	15	15	26.7	90.98	808	0	164.45	12856000	0	61	0			501
P19338;H7BY16	Nucleolin	NCL	NCL	sp|P19338|NUCL_HUMAN Nucleolin OS=Homo sapiens OX=9606 GN=NCL PE=1 SV=3;tr|H7BY16|H7BY16_HUMAN Nucleolin (Fragment) OS=Homo sapiens OX=9606 GN=NCL PE=1 SV=8	Homo sapiens	2	15	15	24.4	76.613	710	0	270.56	12846000	0	61	0			483
Q9NQX3;F5H039;G3V582;H0YJ30;H0YJR5	Gephyrin;Molybdopterin adenylyltransferase;Molybdopterin molybdenumtransferase	GPHN	GPHN	sp|Q9NQX3|GEPH_HUMAN Gephyrin OS=Homo sapiens OX=9606 GN=GPHN PE=1 SV=1;tr|F5H039|F5H039_HUMAN Molybdopterin molybdenumtransferase OS=Homo sapiens OX=9606 GN=GPHN PE=1 SV=1	Homo sapiens	5	17	17	39.5	79.748	736	0	260.16	12766000	0	61	0			791
Q15084	Protein disulfide-isomerase A6	PDIA6	PDIA6	sp|Q15084|PDIA6_HUMAN Protein disulfide-isomerase A6 OS=Homo sapiens OX=9606 GN=PDIA6 PE=1 SV=1	Homo sapiens	1	12	12	35.7	48.121	440	0	323.31	12722000	0	61	0			686
P05387;H0YDD8	60S acidic ribosomal protein P2	RPLP2	RPLP2	sp|P05387|RLA2_HUMAN 60S acidic ribosomal protein P2 OS=Homo sapiens OX=9606 GN=RPLP2 PE=1 SV=1	Homo sapiens	2	9	8	79.1	11.665	115	0	204.9	12497000	0	61	0			434
F8VY35;F8W0J6;F5H4R6;P55209;F8W020;F8VUX1;H0YIV4;H0YHC3;F8W118;F8VXI6;F8VV59;B7Z9C2;H0YH88;F8VVB5;F8VRJ2;B7Z4K9	Nucleosome assembly protein 1-like 1	NAP1L1	NAP1L1	tr|F8VY35|F8VY35_HUMAN Nucleosome assembly protein 1-like 1 (Fragment) OS=Homo sapiens OX=9606 GN=NAP1L1 PE=1 SV=1;tr|F8W0J6|F8W0J6_HUMAN Nucleosome assembly protein 1-like 1 OS=Homo sapiens OX=9606 GN=NAP1L1 PE=1 SV=1;tr|F5H4R6|F5H4R6_HUMAN Nucleosome ass	Homo sapiens	16	9	3	56.4	31.02	264	0	115.98	12417000	0	61	0			256
P50990;H7C4C8;H7C2U0	T-complex protein 1 subunit theta	CCT8	CCT8	sp|P50990|TCPQ_HUMAN T-complex protein 1 subunit theta OS=Homo sapiens OX=9606 GN=CCT8 PE=1 SV=4;tr|H7C4C8|H7C4C8_HUMAN T-complex protein 1 subunit theta (Fragment) OS=Homo sapiens OX=9606 GN=CCT8 PE=1 SV=1	Homo sapiens	3	15	15	32.7	59.62	548	0	272.28	12384000	0	61	0			567
F8W914;H7C106;A0A0U1RQR6	Reticulon	RTN4	RTN4	tr|F8W914|F8W914_HUMAN Reticulon OS=Homo sapiens OX=9606 GN=RTN4 PE=1 SV=1;tr|H7C106|H7C106_HUMAN Reticulon (Fragment) OS=Homo sapiens OX=9606 GN=RTN4 PE=1 SV=1	Homo sapiens	3	7	1	32.2	37.144	345	0	151.03	11838000	0	61	0			268
Q9BQA1;H0Y711	Methylosome protein 50	WDR77	WDR77	sp|Q9BQA1|MEP50_HUMAN Methylosome protein 50 OS=Homo sapiens OX=9606 GN=WDR77 PE=1 SV=1;tr|H0Y711|H0Y711_HUMAN Methylosome protein 50 (Fragment) OS=Homo sapiens OX=9606 GN=WDR77 PE=1 SV=1	Homo sapiens	2	10	10	38.3	36.724	342	0	302.57	11791000	0	61	0			771
O00231;J3QRY4;J3KSW3	26S proteasome non-ATPase regulatory subunit 11	PSMD11	PSMD11	sp|O00231|PSD11_HUMAN 26S proteasome non-ATPase regulatory subunit 11 OS=Homo sapiens OX=9606 GN=PSMD11 PE=1 SV=3;tr|J3QRY4|J3QRY4_HUMAN 26S proteasome non-ATPase regulatory subunit 11 (Fragment) OS=Homo sapiens OX=9606 GN=PSMD11 PE=1 SV=8	Homo sapiens	3	10	10	27.5	47.463	422	0	167.63	11732000	0	61	0			373
P49368;B4DUR8;E9PRC8;Q5SZX6;E9PQ35;E9PM09;Q5SZW8;Q5SZX9	T-complex protein 1 subunit gamma	CCT3	CCT3	sp|P49368|TCPG_HUMAN T-complex protein 1 subunit gamma OS=Homo sapiens OX=9606 GN=CCT3 PE=1 SV=4;tr|B4DUR8|B4DUR8_HUMAN T-complex protein 1 subunit gamma OS=Homo sapiens OX=9606 GN=CCT3 PE=1 SV=1	Homo sapiens	8	11	11	30.8	60.533	545	0	181.66	11467000	0	61	0			560
P63244;D6RAC2;D6RHH4;J3KPE3;D6RFX4;H0YAF8;D6R9Z1;D6R9L0;D6REE5;D6RF23;D6RAU2;E9PD14;D6RFZ9;H0YAM7;H0Y8W2;D6RGK8;D6RHJ5;D6R909;H0Y8R5;D6RBD0;H0Y9P0	Guanine nucleotide-binding protein subunit beta-2-like 1;Guanine nucleotide-binding protein subunit beta-2-like 1, N-terminally processed	GNB2L1	GNB2L1	sp|P63244|RACK1_HUMAN Receptor of activated protein C kinase 1 OS=Homo sapiens OX=9606 GN=RACK1 PE=1 SV=3;tr|D6RAC2|D6RAC2_HUMAN Receptor of-activated protein C kinase 1 OS=Homo sapiens OX=9606 GN=RACK1 PE=1 SV=1;tr|D6RHH4|D6RHH4_HUMAN Receptor of-activate	Homo sapiens	21	7	7	33.1	35.076	317	0	234.53	11423000	0	61	0			622
A0A087WUZ3;Q01082;F8W6C1;O15020;A4QPE4	Spectrin beta chain, non-erythrocytic 1	SPTBN1	SPTBN1	tr|A0A087WUZ3|A0A087WUZ3_HUMAN Spectrin beta chain OS=Homo sapiens OX=9606 GN=SPTBN1 PE=1 SV=1;sp|Q01082|SPTB2_HUMAN Spectrin beta chain, non-erythrocytic 1 OS=Homo sapiens OX=9606 GN=SPTBN1 PE=1 SV=2	Homo sapiens	5	25	25	14.6	274.83	2366	0	323.31	11214000	0	61	0			15
K7EMV3;A0A590UJJ6;B4DEB1;K7EK07;K7ES00;Q71DI3;Q16695;P84243;P68431;K7EP01;Q6NXT2	Histone H3;Histone H3.2;Histone H3.1t;Histone H3.3;Histone H3.1;Histone H3.3C	H3F3B;H3F3A;HIST2H3A;HIST3H3;HIST1H3A;H3F3C	H3F3B	tr|K7EMV3|K7EMV3_HUMAN Histone H3 OS=Homo sapiens OX=9606 GN=H3-3B PE=1 SV=1;tr|A0A590UJJ6|A0A590UJJ6_HUMAN Histone H3 OS=Homo sapiens OX=9606 GN=H3-3A PE=1 SV=1;tr|B4DEB1|B4DEB1_HUMAN Histone H3 OS=Homo sapiens OX=9606 GN=H3-3A PE=1 SV=1;tr|K7EK07|K7EK07_	Homo sapiens	11	6	2	29.3	10.334	92	0	36.481	10527000	0	61	0			104
P10909;H0YC35;E7ERK6;H0YLK8;H0YAS8;E7ETB4;E5RG36;E5RGB0;E5RH61;E5RJZ5	Clusterin;Clusterin beta chain;Clusterin alpha chain;Clusterin	CLU	CLU	sp|P10909|CLUS_HUMAN Clusterin OS=Homo sapiens OX=9606 GN=CLU PE=1 SV=1;tr|H0YC35|H0YC35_HUMAN Clusterin (Fragment) OS=Homo sapiens OX=9606 GN=CLU PE=1 SV=1;tr|E7ERK6|E7ERK6_HUMAN Clusterin (Fragment) OS=Homo sapiens OX=9606 GN=CLU PE=1 SV=1;tr|H0YLK8|H0YL	Homo sapiens	10	10	10	23.8	52.494	449	0	225.04	10459000	0	61	0			453
O60763	General vesicular transport factor p115	USO1	USO1	sp|O60763|USO1_HUMAN General vesicular transport factor p115 OS=Homo sapiens OX=9606 GN=USO1 PE=1 SV=2	Homo sapiens	1	16	16	19.9	107.89	962	0	323.31	10265000	0	61	0			404
Q9UQ80;F8VR77;H0YIN7;F8W0A3;F8VZ69	Proliferation-associated protein 2G4	PA2G4	PA2G4	sp|Q9UQ80|PA2G4_HUMAN Proliferation-associated protein 2G4 OS=Homo sapiens OX=9606 GN=PA2G4 PE=1 SV=3;tr|F8VR77|F8VR77_HUMAN Proliferation-associated protein 2G4 OS=Homo sapiens OX=9606 GN=PA2G4 PE=1 SV=1	Homo sapiens	5	9	9	25.4	43.786	394	0	173.81	10167000	0	61	0			813
P78371;F5GWF6;F8VQ14	T-complex protein 1 subunit beta	CCT2	CCT2	sp|P78371|TCPB_HUMAN T-complex protein 1 subunit beta OS=Homo sapiens OX=9606 GN=CCT2 PE=1 SV=4;tr|F5GWF6|F5GWF6_HUMAN CCT-beta OS=Homo sapiens OX=9606 GN=CCT2 PE=1 SV=2;tr|F8VQ14|F8VQ14_HUMAN CCT-beta OS=Homo sapiens OX=9606 GN=CCT2 PE=1 SV=1	Homo sapiens	3	11	11	31.2	57.488	535	0	323.31	9954200	0	61	0			632
P40227	T-complex protein 1 subunit zeta	CCT6A	CCT6A	sp|P40227|TCPZ_HUMAN T-complex protein 1 subunit zeta OS=Homo sapiens OX=9606 GN=CCT6A PE=1 SV=3	Homo sapiens	1	9	9	22	58.024	531	0	152.2	9632100	0	61	0			543
Q8N163;G3V119;H0YB24;E5RHJ4;E5RGU7;E5RFJ3;A0A087X2B6;H0YC69;H0YC58;E5RHH8	Cell cycle and apoptosis regulator protein 2	CCAR2	CCAR2	sp|Q8N163|CCAR2_HUMAN Cell cycle and apoptosis regulator protein 2 OS=Homo sapiens OX=9606 GN=CCAR2 PE=1 SV=2;tr|G3V119|G3V119_HUMAN Cell cycle and apoptosis regulator protein 2 OS=Homo sapiens OX=9606 GN=CCAR2 PE=1 SV=1;tr|H0YB24|H0YB24_HUMAN Cell cycle a	Homo sapiens	10	14	14	28	102.9	923	0	199.66	9611600	0	61	0			737
A0A286YF22;O43175;A0A2C9F2M7;A0A286YFA2;A0A286YFL2;A0A286YFM8;A0A286YER3;A0A286YFC8;A0A286YFB2;A0A286YF34;A0A286YF78;A0A286YFF3;A0A286YFE1;A0A286YFK5	D-3-phosphoglycerate dehydrogenase	PHGDH	PHGDH	tr|A0A286YF22|A0A286YF22_HUMAN D-3-phosphoglycerate dehydrogenase OS=Homo sapiens OX=9606 GN=PHGDH PE=1 SV=1;sp|O43175|SERA_HUMAN D-3-phosphoglycerate dehydrogenase OS=Homo sapiens OX=9606 GN=PHGDH PE=1 SV=4;tr|A0A2C9F2M7|A0A2C9F2M7_HUMAN D-3-phosphoglycer	Homo sapiens	14	11	11	30	55.938	526	0	115.03	9582600	0	61	0			73
P10155;G5E9R9;H0Y9N5;D6RDN1;D6RE09	60 kDa SS-A/Ro ribonucleoprotein	TROVE2	TROVE2	sp|P10155|RO60_HUMAN 60 kDa SS-A/Ro ribonucleoprotein OS=Homo sapiens OX=9606 GN=RO60 PE=1 SV=2	Homo sapiens	5	15	15	35.5	60.67	538	0	323.31	9533900	0	61	0			450
Q7KZ85	Transcription elongation factor SPT6	SUPT6H	SUPT6H	sp|Q7KZ85|SPT6H_HUMAN Transcription elongation factor SPT6 OS=Homo sapiens OX=9606 GN=SUPT6H PE=1 SV=2	Homo sapiens	1	21	21	17.8	199.07	1726	0	323.31	9431900	0	61	0			724
A0A1B0GUA3;Q96EK5;A0A6Q8PHL8;A0A6Q8PH45;A0A1B0GUH6;A0A6Q8PGG2;A0A0D9SFK7;A0A6Q8PH08;A0A1B0GTE6;A0A1B0GW21;A0A1B0GTX3;A0A1B0GU96;A0A6Q8PHE6;A0A1B0GTE2;A0A1B0GVY9	KIF1-binding protein	KIAA1279;KIF1BP	KIAA1279	tr|A0A1B0GUA3|A0A1B0GUA3_HUMAN KIF-binding protein OS=Homo sapiens OX=9606 GN=KIFBP PE=1 SV=1;sp|Q96EK5|KBP_HUMAN KIF-binding protein OS=Homo sapiens OX=9606 GN=KIFBP PE=1 SV=1;tr|A0A6Q8PHL8|A0A6Q8PHL8_HUMAN KIF-binding protein OS=Homo sapiens OX=9606 GN=K	Homo sapiens	15	12	12	28.5	74.783	646	0	237.69	9148800	0	61	0			63
B5MDF5;P62826;J3KQE5;F5H018;H0YFC6;B4DV51;A0A087X0W0	GTP-binding nuclear protein Ran	RAN	RAN	tr|B5MDF5|B5MDF5_HUMAN GTP-binding nuclear protein Ran OS=Homo sapiens OX=9606 GN=RAN PE=1 SV=1;sp|P62826|RAN_HUMAN GTP-binding nuclear protein Ran OS=Homo sapiens OX=9606 GN=RAN PE=1 SV=3;tr|J3KQE5|J3KQE5_HUMAN GTP-binding nuclear protein Ran (Fragment) O	Homo sapiens	7	6	6	30.9	26.224	233	0	49.761	8941600	0	61	0			153
Q9BVA1	Tubulin beta-2B chain	TUBB2B	TUBB2B	sp|Q9BVA1|TBB2B_HUMAN Tubulin beta-2B chain OS=Homo sapiens OX=9606 GN=TUBB2B PE=1 SV=1	Homo sapiens	1	23	1	63.4	49.953	445	0	125.97	8870500	0	61	0			776
Q14974;J3QR48;J3KTM9;J3QRG4;J3QKQ5	Importin subunit beta-1	KPNB1	KPNB1	sp|Q14974|IMB1_HUMAN Importin subunit beta-1 OS=Homo sapiens OX=9606 GN=KPNB1 PE=1 SV=2	Homo sapiens	5	9	9	12	97.169	876	0	323.31	8846200	0	61	0			682
lcl|NC_017825.1_prot_YP_006272955.1_7		pTP	pTP	lcl|NC_017825.1_prot_YP_006272955.1_7 [locus_tag=YOE_gp07] [db_xref=GeneID:12657141] [protein=pTP] [protein_id=YP_006272955.1] [location=complement(join(8461..10392,13838..13846))] [gbkey=CDS]	Human Adenovirus C5	1	16	16	25.2	74.389	646	0	208.86	8741300	0	61	0			347
A0A087WZZ9;A0A024QZP7;P06493;E5RIU6;K7ELV5;E7ESI2;G3V5T9;P24941;Q00526;G3V317;F8VXD2;A0A2R8YEB7;F8VYH9;F8VZZ0;F8VTV8;F8VWX7;F8VZ51;K7EJ83;A0A2R8Y644;H0YAZ9;Q9BVE2;E7EUK8;E5RGN0;A0A087X209;A0A087WZU2;A0A2R8YD28;F5H6Z0;A0A2R8YF61;A0A2R8Y7W5;J3QSD7;A0A2R8Y4Z0;Q00535;P11802;Q00534;P50750;Q96Q40;O94921;Q07002;Q00536;Q00537;Q9NYV4;Q14004	Cyclin-dependent kinase 1	CDK1;CDC2	CDK1	tr|A0A087WZZ9|A0A087WZZ9_HUMAN Cyclin-dependent kinase 1 OS=Homo sapiens OX=9606 GN=CDK1 PE=1 SV=1;tr|A0A024QZP7|A0A024QZP7_HUMAN Cell division cycle 2, G1 to S and G2 to M, isoform CRA_a OS=Homo sapiens OX=9606 GN=CDK1 PE=1 SV=1;sp|P06493|CDK1_HUMAN Cycli	Homo sapiens	42	6	6	33.9	25.836	224	0	71.882	8665800	0	61	0			0
F5H6X6;Q14697;E9PKU7;E9PNH1	Neutral alpha-glucosidase AB	GANAB	GANAB	tr|F5H6X6|F5H6X6_HUMAN Neutral alpha-glucosidase AB OS=Homo sapiens OX=9606 GN=GANAB PE=1 SV=1;sp|Q14697|GANAB_HUMAN Neutral alpha-glucosidase AB OS=Homo sapiens OX=9606 GN=GANAB PE=1 SV=3;tr|E9PKU7|E9PKU7_HUMAN Neutral alpha-glucosidase AB OS=Homo sapiens	Homo sapiens	4	8	8	13.7	96.215	847	0	84.579	8646900	0	61	0			258
P61978;Q5T6W2;S4R359	Heterogeneous nuclear ribonucleoprotein K	HNRNPK	HNRNPK	sp|P61978|HNRPK_HUMAN Heterogeneous nuclear ribonucleoprotein K OS=Homo sapiens OX=9606 GN=HNRNPK PE=1 SV=1;tr|Q5T6W2|Q5T6W2_HUMAN Heterogeneous nuclear ribonucleoprotein K (Fragment) OS=Homo sapiens OX=9606 GN=HNRNPK PE=1 SV=1	Homo sapiens	3	11	11	30.7	50.976	463	0	309.87	8468400	0	61	0			600
O00267;M0R105;M0R2M5	Transcription elongation factor SPT5	SUPT5H	SUPT5H	sp|O00267|SPT5H_HUMAN Transcription elongation factor SPT5 OS=Homo sapiens OX=9606 GN=SUPT5H PE=1 SV=1	Homo sapiens	3	13	13	17.7	121	1087	0	184.81	8410100	0	61	0			375
E9PKG1;Q99873;E9PIX6;E9PQ98;E9PNR9;H0YDE4;Q9NR22;E9PMW9	Protein arginine N-methyltransferase 1	PRMT1	PRMT1	tr|E9PKG1|E9PKG1_HUMAN Protein arginine N-methyltransferase 1 OS=Homo sapiens OX=9606 GN=PRMT1 PE=1 SV=1;sp|Q99873|ANM1_HUMAN Protein arginine N-methyltransferase 1 OS=Homo sapiens OX=9606 GN=PRMT1 PE=1 SV=3;tr|E9PIX6|E9PIX6_HUMAN Protein arginine N-methyl	Homo sapiens	8	11	11	33.2	37.709	325	0	157.9	8390600	0	61	0			244
O43242	26S proteasome non-ATPase regulatory subunit 3	PSMD3	PSMD3	sp|O43242|PSMD3_HUMAN 26S proteasome non-ATPase regulatory subunit 3 OS=Homo sapiens OX=9606 GN=PSMD3 PE=1 SV=2	Homo sapiens	1	11	11	23.4	60.977	534	0	230.02	8087200	0	61	0			396
Q15008;C9J0E9;H7C531;C9J7B7	26S proteasome non-ATPase regulatory subunit 6	PSMD6	PSMD6	sp|Q15008|PSMD6_HUMAN 26S proteasome non-ATPase regulatory subunit 6 OS=Homo sapiens OX=9606 GN=PSMD6 PE=1 SV=1	Homo sapiens	4	13	13	41.9	45.531	389	0	226.86	8045700	0	61	0			683
Q5SRQ6;P67870;Q5SRQ3;N0E472;A0A0G2JM12;N0E644;A0A0G2JM58	Casein kinase II subunit beta	CSNK2B;CSNK2B-LY6G5B-1181;CSNK2B-LY6G5B--991	CSNK2B	tr|Q5SRQ6|Q5SRQ6_HUMAN Casein kinase II subunit beta OS=Homo sapiens OX=9606 GN=CSNK2B PE=1 SV=2;sp|P67870|CSK2B_HUMAN Casein kinase II subunit beta OS=Homo sapiens OX=9606 GN=CSNK2B PE=1 SV=1;tr|Q5SRQ3|Q5SRQ3_HUMAN Casein kinase II subunit beta OS=Homo sa	Homo sapiens	7	6	6	35	26.925	234	0	49.365	8013800	0	61	0			625
A0A087WWU8;D6R904;A0A494C0G0;H0YL80;H0YKX5;H0YKP3;A0A0S2Z4G6;Q6ZN40;P09493;Q5VU61		TPM3	TPM3	tr|A0A087WWU8|A0A087WWU8_HUMAN Tropomyosin alpha-3 chain OS=Homo sapiens OX=9606 GN=TPM3 PE=1 SV=1;tr|D6R904|D6R904_HUMAN Tropomyosin alpha-3 chain OS=Homo sapiens OX=9606 GN=TPM3 PE=1 SV=1;tr|A0A494C0G0|A0A494C0G0_HUMAN Tropomyosin alpha-3 chain (Fragment	Homo sapiens	10	15	5	48.9	26.42	227	0	146.39	7705600	0	61	0			21
P13010;C9JZ81;H7C0H9	X-ray repair cross-complementing protein 5	XRCC5	XRCC5	sp|P13010|XRCC5_HUMAN X-ray repair cross-complementing protein 5 OS=Homo sapiens OX=9606 GN=XRCC5 PE=1 SV=3	Homo sapiens	3	12	12	21.7	82.704	732	0	169.75	7618300	0	61	0			465
P26640;A0A140T936;A0A140T954;A2ABF4;A0A0G2JJT9;A0A140T904;H0Y426	Valine--tRNA ligase	VARS	VARS	sp|P26640|SYVC_HUMAN Valine--tRNA ligase OS=Homo sapiens OX=9606 GN=VARS1 PE=1 SV=4;tr|A0A140T936|A0A140T936_HUMAN Valyl-tRNA synthetase (Fragment) OS=Homo sapiens OX=9606 GN=VARS1 PE=1 SV=1	Homo sapiens	7	17	17	18.4	140.47	1264	0	235.67	7556000	0	61	0			510
[truncated: 604 more rows]
