# Supplementary material for: Process- and product-related impurities in the ChAdOx1 nCov-19 vaccine
Source: eLife journal article supplement (doi:10.7554/elife.78513), 2022-07-04
Supplement: supp [file elife-78513-supp-v1.zip › elife_poa_e78513_Figure_3_source_data_2.pdf]

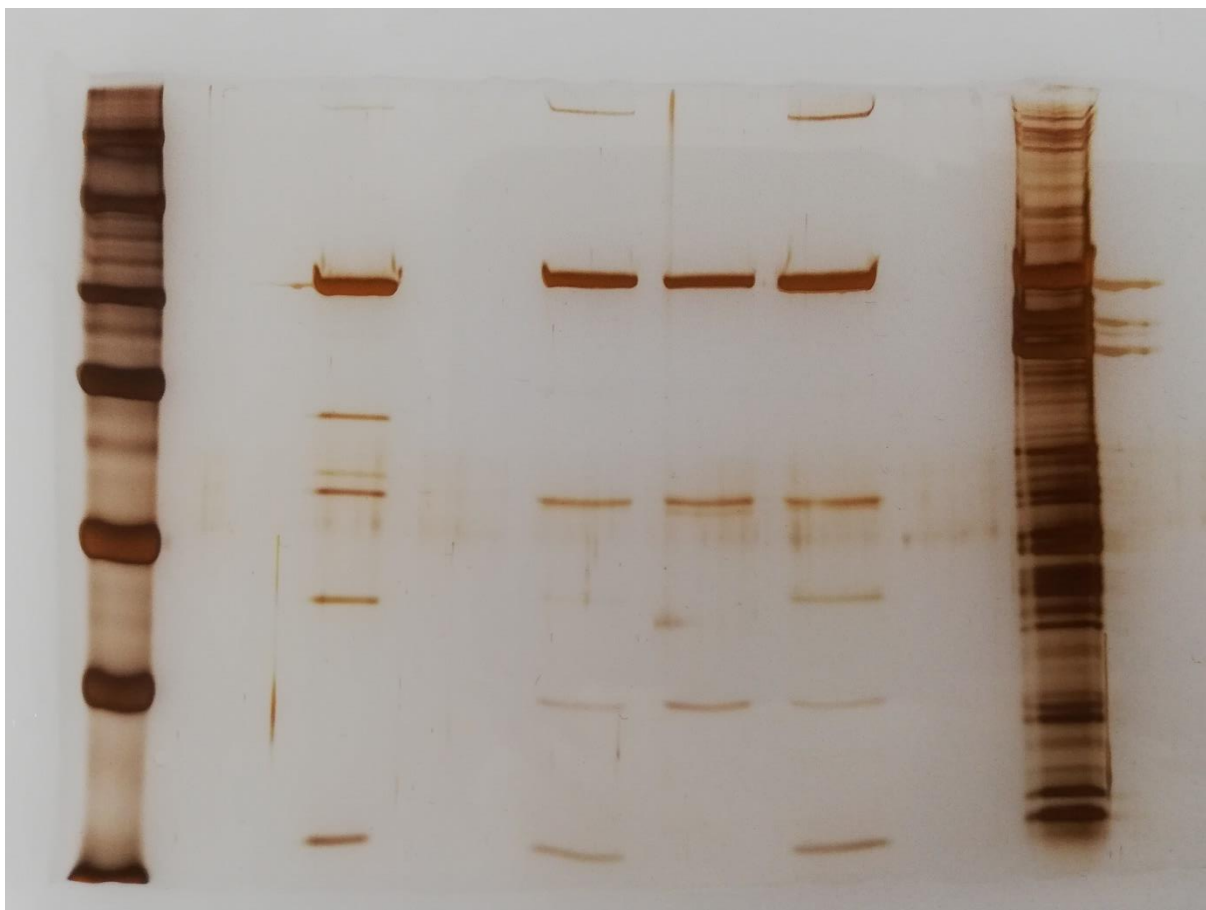

**Figure 3A – source data 1\_Original file of the full raw unedited gel:**  
**Comparison of Ad26.COV2.S and ChAdOx1 nCov-19 vaccines.**  $3 \times 10^9$  adenoviral vector particles were separated by SDS-PAGE under denaturing and reducing conditions. Proteins were visualized by silver staining. Lane 1: Reference protein marker; lane 2: HAdV-5-EGFP; lane 3-5: three lots of Ad26.COV2.S (21C10-01, XD955, XE395); lane 6: one lot of ChAdOx1 (ABV9317).
