# Supplementary material for: Process- and product-related impurities in the ChAdOx1 nCov-19 vaccine
Source: eLife journal article supplement (doi:10.7554/elife.78513), 2022-07-04
Supplement: supp [file elife-78513-supp-v1.zip › elife_poa_e78513_Figure_3_source_data_3.pdf]

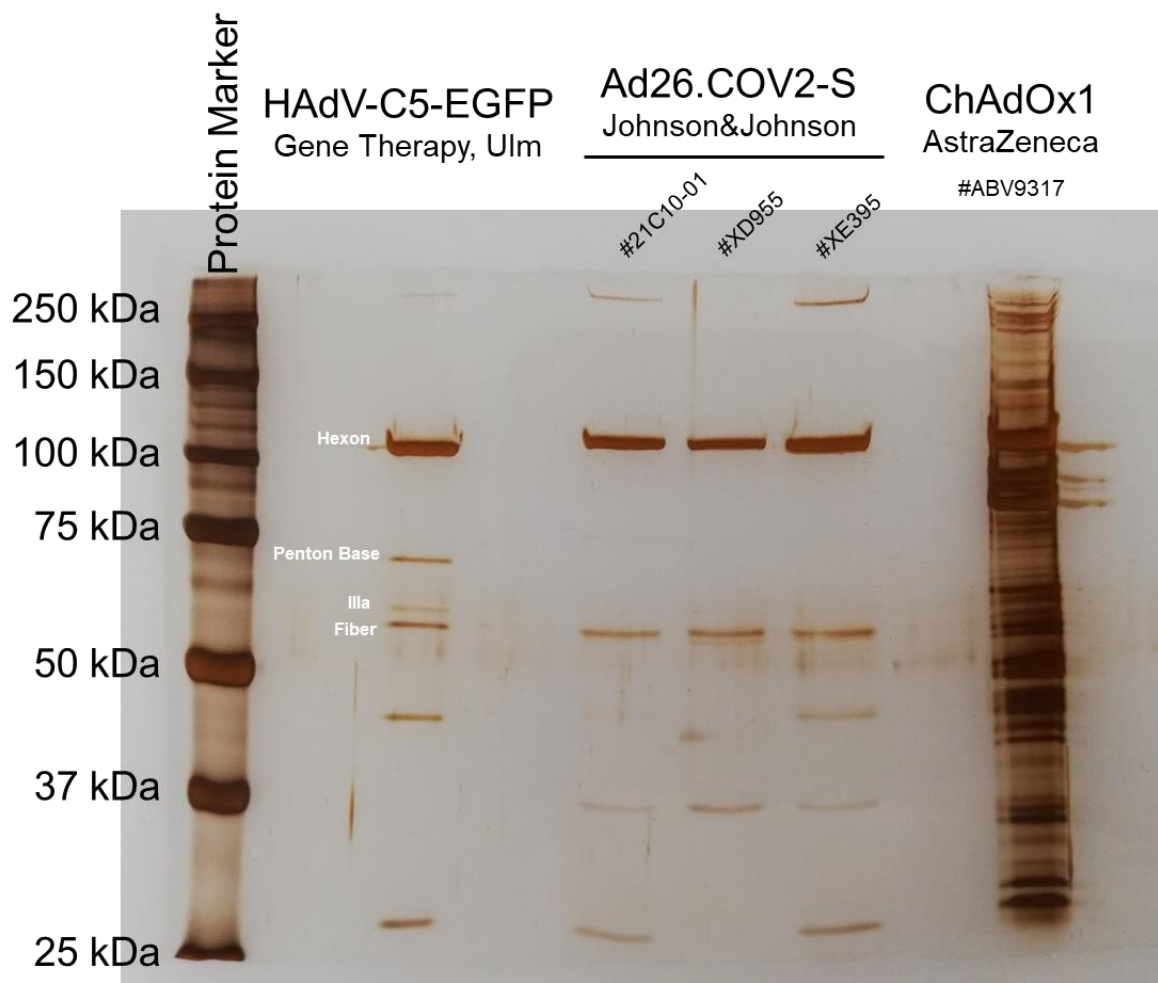

**Figure 3A – source data 2\_ Uncropped gel with the relevant bands labeled:**  
**Protein staining of HAdV-C5-EGFP, three Johnson&Johnson Ad26-COV2.S**  
**vaccine lots and one AstraZeneca ChAdOx1 nCoV-19 vaccine lot.**  $3 \times 10^9$   
 adenoviral vector particles were separated by SDS-PAGE under denaturing and  
 reducing conditions. Proteins were visualized by silver staining. Known HAdV-C5  
 proteins are labeled. Marker bands are labeled. Three lots of Ad26.COV2.S (21C10-  
 01, XD955, XE395) and one lot of ChAdOx1 (ABV9317).
