# Supplementary material for: Process- and product-related impurities in the ChAdOx1 nCov-19 vaccine
Source: eLife journal article supplement (doi:10.7554/elife.78513), 2022-07-04
Supplement: supp [file elife-78513-supp-v1.zip › elife_poa_e78513_Figure_4_source_data_1.xlsx]

## Sheet: in-sol UUlm ChAdOx1 nCov-19
															GVO 901 UUlm ChAdOx1 nCov-19
Protein IDs	Protein names	Gene names	Gene name	Fasta headers	species	Number of proteins	Peptides	Unique peptides	Sequence coverage [%]	Mol. weight [kDa]	Sequence length	Q-value	Score	Intensity	Intensity GVO 901	Rank GVO 901	% Intensity GVO 901	Only identified by site	Potential contaminant	id
lcl|NC_017825.1_prot_YP_006272963.1_15		hexon	hexon	lcl|NC_017825.1_prot_YP_006272963.1_15 [locus_tag=YOE_gp15] [db_xref=GeneID:12657118] [protein=hexon] [protein_id=YP_006272963.1] [location=18302..21130] [gbkey=CDS]	AZ_Chimpanzee adenovirus Y25	1	69	69	81.8	106.03	942	0	323.31	13268000000	56698000	6	7.41971			354
CON__P00761				>P00761 SWISS-PROT:P00761|TRYP_PIG Trypsin - Sus scrofa (Pig).	con_Sus scrofa	1	5	5	24.7	24.409	231	0	50.616	874150000	129940000	2	17.0044		+	181
P04264;CON__P04264	Keratin, type II cytoskeletal 1	KRT1	KRT1	sp|P04264|K2C1_HUMAN Keratin, type II cytoskeletal 1 OS=Homo sapiens OX=9606 GN=KRT1 PE=1 SV=6;	con_Homo sapiens	2	49	37	57.9	66.038	644	0	323.31	681600000	218940000	1	28.6513		+	427
CON__P13645;P13645;CON__Q148H6;CON__Q7Z3Y7;CON__Q2M2I5;Q7Z3Y7;Q2M2I5;A0A3B3ITG2;CON__P05784;CON__Q99456;Q99456;F8VZY9;CON__Q14525;CON__Q9UE12;CON__Q15323;CON__A2A5Y0;CON__Q92764;C4AM86;CON__Q14532;CON__Q7Z3Z0;CON__A2AB72;CON__Q497I4;CON__O76015;CON__Q7Z3Y8;CON__O76013;CON__O76014;CON__REFSEQ:XP_986630;Q14525;Q15323;P05783;Q14532;O76014;Q7Z3Z0;Q92764;O76015;Q7Z3Y8;O76013	Keratin, type I cytoskeletal 10	KRT10	KRT10	;sp|P13645|K1C10_HUMAN Keratin, type I cytoskeletal 10 OS=Homo sapiens OX=9606 GN=KRT10 PE=1 SV=6	con_Homo sapiens	37	39	27	63.2	59.51	593	0	323.31	435670000	117150000	3	15.3307		+	192
P35527;CON__P35527;K7EQQ3	Keratin, type I cytoskeletal 9	KRT9	KRT9	sp|P35527|K1C9_HUMAN Keratin, type I cytoskeletal 9 OS=Homo sapiens OX=9606 GN=KRT9 PE=1 SV=3;;tr|K7EQQ3|K7EQQ3_HUMAN Keratin, type I cytoskeletal 9 OS=Homo sapiens OX=9606 GN=KRT9 PE=1 SV=1	con_Homo sapiens	3	37	36	69.3	62.064	623	0	323.31	233530000	73106000	5	9.56692		+	536
CON__P35908v2;P35908;CON__P35908;Q01546;CON__Q01546;CON__P07744;H0YID6;CON__Q9R0H5;CON__P19013;P19013;H0YHD9;CON__REFSEQ:XP_932229	Keratin, type II cytoskeletal 2 epidermal	KRT2	KRT2	;sp|P35908|K22E_HUMAN Keratin, type II cytoskeletal 2 epidermal OS=Homo sapiens OX=9606 GN=KRT2 PE=1 SV=2;	con_Homo sapiens	12	46	33	75	65.432	639	0	323.31	223330000	91920000	4	12.029		+	194
lcl|NC_017825.1_prot_YP_006272957.1_9		pIIIa	pIIIa	lcl|NC_017825.1_prot_YP_006272957.1_9 [locus_tag=YOE_gp09] [db_xref=GeneID:12657143] [protein=pIIIa] [protein_id=YP_006272957.1] [location=12041..13810] [gbkey=CDS]	AZ_Chimpanzee adenovirus Y25	1	36	36	72.3	65.884	589	0	323.31	718790000	2902800	13	0.379871			349
lcl|NC_017825.1_prot_YP_006272958.1_10		penton	penton	lcl|NC_017825.1_prot_YP_006272958.1_10 [locus_tag=YOE_gp10] [db_xref=GeneID:12657144] [protein=penton] [protein_id=YP_006272958.1] [location=13891..15489] [gbkey=CDS]	AZ_Chimpanzee adenovirus Y25	1	24	24	54.7	59.479	532	0	323.31	409580000	2166100	15	0.283464			350
CON__P13647;P13647;F8W0C6;F8VV57;H0YI76;H0YIN9;F8VU69	Keratin, type II cytoskeletal 5	KRT5	KRT5	;sp|P13647|K2C5_HUMAN Keratin, type II cytoskeletal 5 OS=Homo sapiens OX=9606 GN=KRT5 PE=1 SV=3	con_Homo sapiens	7	28	8	39.8	62.378	590	0	200.26	23136000	10391000	7	1.3598		+	193
H7C5R5;F8WAE5;Q9BY44	Eukaryotic translation initiation factor 2A;Eukaryotic translation initiation factor 2A, N-terminally processed	EIF2A	EIF2A	tr|H7C5R5|H7C5R5_HUMAN Eukaryotic translation initiation factor 2A (Fragment) OS=Homo sapiens OX=9606 GN=EIF2A PE=1 SV=1;tr|F8WAE5|F8WAE5_HUMAN Eukaryotic translation initiation factor 2A OS=Homo sapiens OX=9606 GN=EIF2A PE=1 SV=1;sp|Q9BY44|EIF2A_HUMAN Euk	Homo sapiens	3	1	1	2.8	35.189	316	0	6.7693	4938100	0	70	0			270
E7ES33;E7EPK1;Q16181;A0A5F9ZGZ7;A0A0U1RRD1;G3V1Q4;A0A0U1RRH9;A0A0U1RRE1	Septin-7	2007-09-01	2007-09-01	tr|E7ES33|E7ES33_HUMAN Septin-7 OS=Homo sapiens OX=9606 GN=SEPTIN7 PE=1 SV=3;tr|E7EPK1|E7EPK1_HUMAN Septin-7 OS=Homo sapiens OX=9606 GN=SEPTIN7 PE=1 SV=2;sp|Q16181|SEPT7_HUMAN Septin-7 OS=Homo sapiens OX=9606 GN=SEPTIN7 PE=1 SV=2;tr|A0A5F9ZGZ7|A0A5F9ZGZ7_H	Homo sapiens	8	4	3	17.5	48.715	417	0	115.8	10391000	1491300	19	0.195157			221
CON__P08779;P08779;K7ENW6;CON__Q9Z2K1;CON__Q3ZAW8	Keratin, type I cytoskeletal 16	KRT16	KRT16	;sp|P08779|K1C16_HUMAN Keratin, type I cytoskeletal 16 OS=Homo sapiens OX=9606 GN=KRT16 PE=1 SV=4	con_Homo sapiens	5	23	12	55.2	51.267	473	0	323.31	17806000	9767300	8	1.27818		+	191
B1AMS2;Q14141	Septin-6	2006-09-01	2006-09-01	tr|B1AMS2|B1AMS2_HUMAN Septin 6, isoform CRA_b OS=Homo sapiens OX=9606 GN=SEPTIN6 PE=1 SV=1;sp|Q14141|SEPT6_HUMAN Septin-6 OS=Homo sapiens OX=9606 GN=SEPTIN6 PE=1 SV=4	Homo sapiens	2	4	4	19.3	49.303	431	0	49.066	9946900	1729100	18	0.226276			137
Q15019;C9IZU3;C9J938;C9JB25;B5MCX3;C9JZI2;C9JQJ4;A0A1B0GXJ2;C9JFT1;F8WB65;C9IY94;C9J2Q4;C9JT15;C9JSE7;B5MD47;H7C310;H7C2Y0	Septin-2	2002-09-01	2002-09-01	sp|Q15019|SEPT2_HUMAN Septin-2 OS=Homo sapiens OX=9606 GN=SEPTIN2 PE=1 SV=1;tr|C9IZU3|C9IZU3_HUMAN Septin-2 (Fragment) OS=Homo sapiens OX=9606 GN=SEPTIN2 PE=1 SV=1;tr|C9J938|C9J938_HUMAN Septin-2 (Fragment) OS=Homo sapiens OX=9606 GN=SEPTIN2 PE=1 SV=1;tr|C	Homo sapiens	17	7	6	34.3	41.487	361	0	181.98	3184700	376710	31	0.0492977			684
CON__P02533;P02533;CON__Q6IFX2;K7ENV3;CON__Q61782	Keratin, type I cytoskeletal 14	KRT14	KRT14	;sp|P02533|K1C14_HUMAN Keratin, type I cytoskeletal 14 OS=Homo sapiens OX=9606 GN=KRT14 PE=1 SV=4	con_Homo sapiens	5	22	7	48.9	51.621	472	0	196.41	11102000	6926900	11	0.90648		+	182
lcl|NC_017825.1_prot_YP_006272959.1_11		pVII	pVII	lcl|NC_017825.1_prot_YP_006272959.1_11 [locus_tag=YOE_gp11] [db_xref=GeneID:12657145] [protein=pVII] [protein_id=YP_006272959.1] [location=15493..16074] [gbkey=CDS]	AZ_Chimpanzee adenovirus Y25	1	15	15	48.2	21.265	193	0	323.31	381440000	7695600	10	1.00707			351
lcl|NC_017825.1_prot_YP_006272962.1_14		pVI	pVI	lcl|NC_017825.1_prot_YP_006272962.1_14 [locus_tag=YOE_gp14] [db_xref=GeneID:12657117] [protein=pVI] [protein_id=YP_006272962.1] [location=17470..18201] [gbkey=CDS]	AZ_Chimpanzee adenovirus Y25	1	19	19	73.3	26.267	243	0	323.31	287680000	2007400	16	0.262696			353
M0QZK8;O75223	Gamma-glutamylcyclotransferase	GGCT	GGCT	tr|M0QZK8|M0QZK8_HUMAN Gamma-glutamylcyclotransferase OS=Homo sapiens OX=9606 PE=4 SV=1;sp|O75223|GGCT_HUMAN Gamma-glutamylcyclotransferase OS=Homo sapiens OX=9606 GN=GGCT PE=1 SV=1	Homo sapiens	2	2	2	28.2	11.578	103	0	10.883	853830	0	70	0			365
CON__P48668;P48668	Keratin, type II cytoskeletal 6C	KRT6C	KRT6C	;sp|P48668|K2C6C_HUMAN Keratin, type II cytoskeletal 6C OS=Homo sapiens OX=9606 GN=KRT6C PE=1 SV=3	con_Homo sapiens	2	26	0	42.2	60.024	564	0	169.71	9837700	8772300	9	1.14798		+	195
A0A3B3IS46;A0A3B3IRX3;Q71F56	Mediator of RNA polymerase II transcription subunit 13-like	MED13L	MED13L	tr|A0A3B3IS46|A0A3B3IS46_HUMAN Mediator of RNA polymerase II transcription subunit 13 (Fragment) OS=Homo sapiens OX=9606 GN=MED13L PE=1 SV=1;tr|A0A3B3IRX3|A0A3B3IRX3_HUMAN Mediator of RNA polymerase II transcription subunit 13 OS=Homo sapiens OX=9606 GN=ME	Homo sapiens	3	1	1	0.7	175.59	1605	0.0027285	6.1889	671830	0	70	0			90
lcl|NC_017825.1_prot_YP_006272969.1_21		pVIII	pVIII	lcl|NC_017825.1_prot_YP_006272969.1_21 [locus_tag=YOE_gp21] [db_xref=GeneID:12657124] [protein=pVIII] [protein_id=YP_006272969.1] [location=26455..27138] [gbkey=CDS]	AZ_Chimpanzee adenovirus Y25	1	11	11	69.2	24.757	227	0	323.31	60021000	139400	54	0.0182424			359
U3KQK0;Q99879;Q99877;Q93079;Q5QNW6;Q16778;P62807;P58876;P57053;P33778;P23527;P06899;O60814;Q99880;Q8N257	Histone H2B;Histone H2B type 1-M;Histone H2B type 1-N;Histone H2B type 1-H;Histone H2B type 2-F;Histone H2B type 2-E;Histone H2B type 1-C/E/F/G/I;Histone H2B type 1-D;Histone H2B type F-S;Histone H2B type 1-B;Histone H2B type 1-O;Histone H2B type 1-J;Histone H2B type 1-K;Histone H2B type 1-L;Histone H2B type 3-B	HIST1H2BN;HIST1H2BM;HIST1H2BH;HIST2H2BF;HIST2H2BE;HIST1H2BC;HIST1H2BD;H2BFS;HIST1H2BB;HIST1H2BO;HIST1H2BJ;HIST1H2BK;HIST1H2BL;HIST3H2BB	HIST1H2BN	tr|U3KQK0|U3KQK0_HUMAN Histone H2B OS=Homo sapiens OX=9606 GN=H2BC15 PE=1 SV=1;sp|Q99879|H2B1M_HUMAN Histone H2B type 1-M OS=Homo sapiens OX=9606 GN=H2BC14 PE=1 SV=3;sp|Q99877|H2B1N_HUMAN Histone H2B type 1-N OS=Homo sapiens OX=9606 GN=H2BC15 PE=1 SV=3;sp|	Homo sapiens	15	2	2	13.3	18.804	166	0	40.736	1583800	321530	32	0.0420766			405
D6RBM7;D6R9F2;D6RA14		TXK	TXK	tr|D6RBM7|D6RBM7_HUMAN Tyrosine-protein kinase TXK OS=Homo sapiens OX=9606 GN=TXK PE=4 SV=1;tr|D6R9F2|D6R9F2_HUMAN Tyrosine-protein kinase TXK OS=Homo sapiens OX=9606 GN=TXK PE=4 SV=1;tr|D6RA14|D6RA14_HUMAN Tyrosine-protein kinase TXK OS=Homo sapiens OX=96	Homo sapiens	3	1	1	22.9	5.7686	48	0.0014599	6.6657	619610	0	70	0			204
A0A2R8YEY5;D6RDJ3				tr|A0A2R8YEY5|A0A2R8YEY5_HUMAN DNA-directed RNA polymerases I and III subunit RPAC1 OS=Homo sapiens OX=9606 GN=POLR1C PE=1 SV=1	Homo sapiens	2	5	1	28.2	32.917	291	0.0040377	6.136	563440	0	70	0			85
A0A0C4DGB6;CON__P02768-1;P02768;H0YA55;D6RHD5;B7WNR0;C9JKR2;A0A087WWT3;H7C013	Serum albumin	ALB	ALB	tr|A0A0C4DGB6|A0A0C4DGB6_HUMAN Albumin OS=Homo sapiens OX=9606 GN=ALB PE=1 SV=1;;sp|P02768|ALBU_HUMAN Albumin OS=Homo sapiens OX=9606 GN=ALB PE=1 SV=2;tr|H0YA55|H0YA55_HUMAN Albumin (Fragment) OS=Homo sapiens OX=9606 GN=ALB PE=1 SV=1;tr|D6RHD5|D6RHD5_HUMAN	con_Homo sapiens	9	14	11	29.3	69.226	604	0	98.684	4080800	2917100	12	0.381742		+	49
A0A1W2PPY4;Q9ULH0	Kinase D-interacting substrate of 220 kDa	KIDINS220	KIDINS220	tr|A0A1W2PPY4|A0A1W2PPY4_HUMAN Kinase D-interacting substrate of 220 kDa (Fragment) OS=Homo sapiens OX=9606 GN=KIDINS220 PE=1 SV=1;sp|Q9ULH0|KDIS_HUMAN Kinase D-interacting substrate of 220 kDa OS=Homo sapiens OX=9606 GN=KIDINS220 PE=1 SV=3	Homo sapiens	2	1	1	3.7	29.393	269	0	6.7698	431960	0	70	0			69
P61626;F8VV32;A0A0B4J259	Lysozyme C;Lysozyme	LYZ	LYZ	sp|P61626|LYSC_HUMAN Lysozyme C OS=Homo sapiens OX=9606 GN=LYZ PE=1 SV=1;tr|F8VV32|F8VV32_HUMAN 1,4-beta-N-acetylmuramidase C OS=Homo sapiens OX=9606 GN=LYZ PE=1 SV=1;tr|A0A0B4J259|A0A0B4J259_HUMAN 1,4-beta-N-acetylmuramidase C OS=Homo sapiens OX=9606 GN=L	Homo sapiens	3	2	2	27	16.537	148	0	49.444	1593100	937070	22	0.122628			599
CON__P02535-1				>P02535-1 SWISS-PROT:P02535-1 Tax_Id=10090 Gene_Symbol=Krt10 Isoform 1 of Keratin, type I cytoskeletal 10	con	1	10	1	15.6	57.769	570	0	6.9077	658930	307800	34	0.0402798		+	183
Q86TJ2	Transcriptional adapter 2-beta	TADA2B	TADA2B	sp|Q86TJ2|TAD2B_HUMAN Transcriptional adapter 2-beta OS=Homo sapiens OX=9606 GN=TADA2B PE=1 SV=2	Homo sapiens	1	1	1	1.7	48.47	420	0.007762	5.94	8739300	486930	28	0.0637214			730
lcl|NC_017825.1_prot_YP_006272956.1_8		52/55kDa	52/55kDa	lcl|NC_017825.1_prot_YP_006272956.1_8 [locus_tag=YOE_gp08] [db_xref=GeneID:12657142] [protein=52/55kDa] [protein_id=YP_006272956.1] [location=10827..12017] [gbkey=CDS]	AZ_Chimpanzee adenovirus Y25	1	21	21	51	44.84	396	0	323.31	310220000	0	70	0			348
CON__P02666				>P02666 SWISS-PROT:P02666 Beta-casein - Bos taurus (Bovine).	con_Bos taurus	1	1	1	9.1	23.583	209	0	14.036	409630	0	70	0		+	187
C9JX77		PFKFB4	PFKFB4	tr|C9JX77|C9JX77_HUMAN 6-phosphofructo-2-kinase/fructose-2,6-bisphosphatase 4 (Fragment) OS=Homo sapiens OX=9606 GN=PFKFB4 PE=1 SV=1	Homo sapiens	1	2	2	10.3	20.191	175	0	10.791	236120	0	70	0			178
P60709;P63261;E7EVS6;A0A2R8Y793;A0A6Q8PFE4;I3L4N8;I3L3I0;I3L1U9;A5A3E0;G5E9R0;A0A6Q8PH58;A0A2R8YEA7;A0A2R8YGF8;C9JUM1;C9JZR7;K7EM38;I3L3R2;J3KT65;A0A2R8YFE2;C9JTX5;F8WCH0;Q562R1;A0A6Q8PGD7	Actin, cytoplasmic 1;Actin, cytoplasmic 1, N-terminally processed;Actin, cytoplasmic 2;Actin, cytoplasmic 2, N-terminally processed	ACTB;ACTG1	ACTB	sp|P60709|ACTB_HUMAN Actin, cytoplasmic 1 OS=Homo sapiens OX=9606 GN=ACTB PE=1 SV=1;sp|P63261|ACTG_HUMAN Actin, cytoplasmic 2 OS=Homo sapiens OX=9606 GN=ACTG1 PE=1 SV=1;tr|E7EVS6|E7EVS6_HUMAN Actin, cytoplasmic 1 OS=Homo sapiens OX=9606 GN=ACTB PE=1 SV=9;t	Homo sapiens	23	18	6	58.1	41.736	375	0	323.31	274100000	880800	23	0.115265			591
CON__Q5D862;Q5D862	Filaggrin-2	FLG2	FLG2	;sp|Q5D862|FILA2_HUMAN Filaggrin-2 OS=Homo sapiens OX=9606 GN=FLG2 PE=1 SV=1	con_Homo sapiens	2	4	4	3.5	248.07	2391	0	33.58	1606700	584570	27	0.076499		+	199
CON__Q14CN4-1;CON__Q6IME9;CON__Q3SY84;CON__Q7RTS7;CON__Q32MB2;F8W1S1;Q14CN4;Q3SY84;Q7RTS7;Q86Y46;H0YIG3	Keratin, type II cytoskeletal 72;Keratin, type II cytoskeletal 71;Keratin, type II cytoskeletal 74;Keratin, type II cytoskeletal 73	KRT74;KRT72;KRT71;KRT73	KRT74	;;;;;tr|F8W1S1|F8W1S1_HUMAN Keratin, type II cytoskeletal 74 OS=Homo sapiens OX=9606 GN=KRT74 PE=1 SV=1;sp|Q14CN4|K2C72_HUMAN Keratin, type II cytoskeletal 72 OS=Homo sapiens OX=9606 GN=KRT72 PE=1 SV=2;sp|Q3SY84|K2C71_HUMAN Keratin, type II cytoskeletal 71	con_Homo sapiens	11	3	1	4.1	55.877	511	0	53.555	880580	248020	40	0.0324568		+	198
A0A087WYI3;P41439	Folate receptor gamma	FOLR3	FOLR3	tr|A0A087WYI3|A0A087WYI3_HUMAN Folate receptor gamma (Fragment) OS=Homo sapiens OX=9606 GN=FOLR3 PE=1 SV=1;sp|P41439|FOLR3_HUMAN Folate receptor gamma OS=Homo sapiens OX=9606 GN=FOLR3 PE=1 SV=2	Homo sapiens	2	1	1	13.5	20.624	178	1	-2	193120	0	70	0	+		26
Q02413	Desmoglein-1	DSG1	DSG1	sp|Q02413|DSG1_HUMAN Desmoglein-1 OS=Homo sapiens OX=9606 GN=DSG1 PE=1 SV=2	Homo sapiens	1	9	9	12.3	113.75	1049	0	154.66	2395700	1944300	17	0.254438			638
E9PP36;E9PKZ0;E9PKU4;P62917	60S ribosomal protein L8	RPL8	RPL8	tr|E9PP36|E9PP36_HUMAN 60S ribosomal protein L8 OS=Homo sapiens OX=9606 GN=RPL8 PE=1 SV=1;tr|E9PKZ0|E9PKZ0_HUMAN 60S ribosomal protein L8 (Fragment) OS=Homo sapiens OX=9606 GN=RPL8 PE=1 SV=1;tr|E9PKU4|E9PKU4_HUMAN 60S ribosomal protein L8 (Fragment) OS=Hom	Homo sapiens	4	1	1	7.4	16.18	148	0	8.688	296390	141930	53	0.0185735			246
K7EMA7;H7BY10;K7ERT8;A8MUS3;P62750	60S ribosomal protein L23a	RPL23A	RPL23A	tr|K7EMA7|K7EMA7_HUMAN 60S ribosomal protein L23a OS=Homo sapiens OX=9606 GN=RPL23A PE=1 SV=1;tr|H7BY10|H7BY10_HUMAN 60S ribosomal protein L23a (Fragment) OS=Homo sapiens OX=9606 GN=RPL23A PE=1 SV=1;tr|K7ERT8|K7ERT8_HUMAN 60S ribosomal protein L23a (Fragme	Homo sapiens	5	1	1	24.3	7.9232	70	0	15.79	115150	0	70	0			130
A0A5F9ZHX5;Q12873	Chromodomain-helicase-DNA-binding protein 3	CHD3	CHD3	tr|A0A5F9ZHX5|A0A5F9ZHX5_HUMAN DNA helicase (Fragment) OS=Homo sapiens OX=9606 GN=CHD3 PE=1 SV=1;sp|Q12873|CHD3_HUMAN Chromodomain-helicase-DNA-binding protein 3 OS=Homo sapiens OX=9606 GN=CHD3 PE=1 SV=3	Homo sapiens	2	2	1	1.9	155.13	1357	0	7.194	863350	0	70	0			108
E9PI01;E9PLL7;Q96JM7	Lethal(3)malignant brain tumor-like protein 3	L3MBTL3	L3MBTL3	tr|E9PI01|E9PI01_HUMAN Lethal(3)malignant brain tumor-like protein 3 (Fragment) OS=Homo sapiens OX=9606 GN=L3MBTL3 PE=1 SV=1;tr|E9PLL7|E9PLL7_HUMAN Lethal(3)malignant brain tumor-like protein 3 (Fragment) OS=Homo sapiens OX=9606 GN=L3MBTL3 PE=1 SV=1;sp|Q96	Homo sapiens	3	1	1	12.3	17.804	163	1	-2	112610	0	70	0	+		238
F8VUA6;F8VYV2;A0A075B7A0;G3V203;H0YHA7;J3QQ67;Q07020	60S ribosomal protein L18	RPL18	RPL18	tr|F8VUA6|F8VUA6_HUMAN 60S ribosomal protein L18 (Fragment) OS=Homo sapiens OX=9606 GN=RPL18 PE=1 SV=1;tr|F8VYV2|F8VYV2_HUMAN 60S ribosomal protein L18 OS=Homo sapiens OX=9606 GN=RPL18 PE=1 SV=1;tr|A0A075B7A0|A0A075B7A0_HUMAN 60S ribosomal protein L18 OS=H	Homo sapiens	7	1	1	10	14.529	130	0	81.779	483110	0	70	0			4
A0A0C4DG53		RORA	RORA	tr|A0A0C4DG53|A0A0C4DG53_HUMAN Nuclear receptor ROR-alpha OS=Homo sapiens OX=9606 GN=RORA PE=1 SV=1	Homo sapiens	1	1	1	1.9	53.54	468	1	-2	103720	0	70	0	+		47
C9JER0;C9J370;A0A0J9YWR1;Q6PJE2	POM121 and ZP3 fusion protein	POMZP3	POMZP3	tr|C9JER0|C9JER0_HUMAN POM121 and ZP3 fusion protein OS=Homo sapiens OX=9606 GN=POMZP3 PE=4 SV=1;tr|C9J370|C9J370_HUMAN POM121 and ZP3 fusion protein (Fragment) OS=Homo sapiens OX=9606 GN=POMZP3 PE=4 SV=1;tr|A0A0J9YWR1|A0A0J9YWR1_HUMAN POM121 and ZP3 fusio	Homo sapiens	4	1	1	5.8	17.274	154	1	-2	102600	0	70	0	+		58
A0A6Q8PHC2;Q9UHD8;K7EQ08;K7EKN4;K7EN52;K7ENQ5;K7EJZ2;K7ER52;K7EIE4;K7ER14;K7EQD7;K7EK18;K7EL40	Septin-9	2009-09-01	2009-09-01	tr|A0A6Q8PHC2|A0A6Q8PHC2_HUMAN Septin-9 OS=Homo sapiens OX=9606 GN=SEPTIN9 PE=1 SV=1;sp|Q9UHD8|SEPT9_HUMAN Septin-9 OS=Homo sapiens OX=9606 GN=SEPTIN9 PE=1 SV=2;tr|K7EQ08|K7EQ08_HUMAN Septin-9 OS=Homo sapiens OX=9606 GN=SEPTIN9 PE=1 SV=1;tr|K7EKN4|K7EKN4_H	Homo sapiens	13	2	2	14.8	33.229	290	0	11.969	101460	0	70	0			119
E7EPB3;P50914	60S ribosomal protein L14	RPL14	RPL14	tr|E7EPB3|E7EPB3_HUMAN 60S ribosomal protein L14 OS=Homo sapiens OX=9606 GN=RPL14 PE=1 SV=1;sp|P50914|RL14_HUMAN 60S ribosomal protein L14 OS=Homo sapiens OX=9606 GN=RPL14 PE=1 SV=4	Homo sapiens	2	3	3	28.2	14.558	124	0	37.26	1380000	0	70	0			220
H7C265;S4R381;H7BXU9;E7EVR7;D2CGD1;A0A5S6RJB7;F8W9L4;A0A0A0MR25;P22607;P21802	Receptor protein-tyrosine kinase;Fibroblast growth factor receptor;Fibroblast growth factor receptor 3;Fibroblast growth factor receptor 2	FGFR2;FGFR3	FGFR2	tr|H7C265|H7C265_HUMAN Fibroblast growth factor receptor 2 (Fragment) OS=Homo sapiens OX=9606 GN=FGFR2 PE=1 SV=1;tr|S4R381|S4R381_HUMAN Receptor protein-tyrosine kinase OS=Homo sapiens OX=9606 GN=FGFR2 PE=1 SV=1;tr|H7BXU9|H7BXU9_HUMAN Receptor protein-tyro	Homo sapiens	10	1	1	5.1	41.889	371	1	-2	92421	0	70	0	+		35
J3QS39;J3QTR3;F5H6Q2;F5GYU3;F5H2Z3;F5H265;B4DV12;F5H388;F5H747;F5GXK7;J3QKN0;Q5PY61;Q96C32;P62987;P62979;P0CG47;P0CG48;M0R1V7;M0R1M6;M0R2S1;A0A2R8Y422;J3QSA3;F5GZ39	Ubiquitin-60S ribosomal protein L40;Ubiquitin;60S ribosomal protein L40;Ubiquitin-40S ribosomal protein S27a;Ubiquitin;40S ribosomal protein S27a;Polyubiquitin-B;Ubiquitin;Polyubiquitin-C;Ubiquitin	UBB;RPS27A;UBC;UBA52	UBB	tr|J3QS39|J3QS39_HUMAN Polyubiquitin-B (Fragment) OS=Homo sapiens OX=9606 GN=UBB PE=1 SV=1;tr|J3QTR3|J3QTR3_HUMAN Ubiquitin-40S ribosomal protein S27a (Fragment) OS=Homo sapiens OX=9606 GN=RPS27A PE=1 SV=1;tr|F5H6Q2|F5H6Q2_HUMAN Polyubiquitin-C (Fragment)	Homo sapiens	23	4	4	50.5	10.469	93	0	159.93	27110000	258820	39	0.0338701			148
Q5JR95;P62241	40S ribosomal protein S8	RPS8	RPS8	tr|Q5JR95|Q5JR95_HUMAN 40S ribosomal protein S8 OS=Homo sapiens OX=9606 GN=RPS8 PE=1 SV=1;sp|P62241|RS8_HUMAN 40S ribosomal protein S8 OS=Homo sapiens OX=9606 GN=RPS8 PE=1 SV=2	Homo sapiens	2	7	7	35.6	21.879	188	0	201.13	3853200	0	70	0			605
C9J0E4;P01040	Cystatin-A;Cystatin-A, N-terminally processed	CSTA	CSTA	tr|C9J0E4|C9J0E4_HUMAN Cystatin-A OS=Homo sapiens OX=9606 GN=CSTA PE=1 SV=1;sp|P01040|CYTA_HUMAN Cystatin-A OS=Homo sapiens OX=9606 GN=CSTA PE=1 SV=1	Homo sapiens	2	2	2	52.4	7.0861	63	0	14.212	613100	192970	47	0.0252528			165
A8MUD9;P18124	60S ribosomal protein L7	RPL7	RPL7	tr|A8MUD9|A8MUD9_HUMAN 60S ribosomal protein L7 OS=Homo sapiens OX=9606 GN=RPL7 PE=1 SV=1;sp|P18124|RL7_HUMAN 60S ribosomal protein L7 OS=Homo sapiens OX=9606 GN=RPL7 PE=1 SV=1	Homo sapiens	2	1	1	5.3	24.433	208	0	22.417	622510	0	70	0			129
CON__Q7Z794;Q7Z794;F8VS61	Keratin, type II cytoskeletal 1b	KRT77	KRT77	;sp|Q7Z794|K2C1B_HUMAN Keratin, type II cytoskeletal 1b OS=Homo sapiens OX=9606 GN=KRT77 PE=1 SV=3;tr|F8VS61|F8VS61_HUMAN Keratin, type II cytoskeletal 1b OS=Homo sapiens OX=9606 GN=KRT77 PE=1 SV=1	con_Homo sapiens	3	6	3	10.4	61.802	578	0	35.027	310050	244530	41	0.0320001		+	201
E7ETK0;A0A2R8Y849;A0A2R8YD14;P62847;A0A2R8Y8A0	40S ribosomal protein S24	RPS24	RPS24	tr|E7ETK0|E7ETK0_HUMAN 40S ribosomal protein S24 OS=Homo sapiens OX=9606 GN=RPS24 PE=1 SV=1;tr|A0A2R8Y849|A0A2R8Y849_HUMAN 40S ribosomal protein S24 OS=Homo sapiens OX=9606 GN=RPS24 PE=1 SV=1;tr|A0A2R8YD14|A0A2R8YD14_HUMAN 40S ribosomal protein S24 OS=Homo	Homo sapiens	5	2	2	15.3	15.197	131	0	14.062	491210	0	70	0			83
P68363;C9JDS9	Tubulin alpha-1B chain	TUBA1B	TUBA1B	sp|P68363|TBA1B_HUMAN Tubulin alpha-1B chain OS=Homo sapiens OX=9606 GN=TUBA1B PE=1 SV=1	Homo sapiens	2	24	0	70.3	50.151	451	0	323.31	610420000	0	70	0			629
A0A0U1RR32;A0A0U1RRH7;Q99878;Q96KK5;Q9BTM1;Q16777;Q6FI13;P20671;P0C0S8;H0YFX9;Q93077;Q7L7L0;P04908;C9J0D1;A0A494C189;A0A3B3IS11;Q71UI9;P0C0S5;Q8IUE6;Q96QV6;P16104	Histone H2A type 1-J;Histone H2A type 1-H;Histone H2A.J;Histone H2A type 2-C;Histone H2A type 2-A;Histone H2A type 1-D;Histone H2A type 1;Histone H2A;Histone H2A type 1-C;Histone H2A type 3;Histone H2A type 1-B/E	HIST1H2AJ;HIST1H2AH;H2AFJ;HIST2H2AC;HIST2H2AA3;HIST1H2AD;HIST1H2AG;HIST1H2AC;HIST3H2A;HIST1H2AB	HIST1H2AJ	tr|A0A0U1RR32|A0A0U1RR32_HUMAN Histone H2A OS=Homo sapiens OX=9606 GN=hCG_2039566 PE=3 SV=1;tr|A0A0U1RRH7|A0A0U1RRH7_HUMAN Histone H2A OS=Homo sapiens OX=9606 PE=3 SV=1;sp|Q99878|H2A1J_HUMAN Histone H2A type 1-J OS=Homo sapiens OX=9606 GN=H2AC14 PE=1 SV=3;	Homo sapiens	21	3	3	23.1	18.481	169	0	29.746	1558100	42175	68	0.00551918			62
Q5T8U3;P62424;Q5T8U2	60S ribosomal protein L7a	RPL7A	RPL7A	tr|Q5T8U3|Q5T8U3_HUMAN 60S ribosomal protein L7a (Fragment) OS=Homo sapiens OX=9606 GN=RPL7A PE=1 SV=1;sp|P62424|RL7A_HUMAN 60S ribosomal protein L7a OS=Homo sapiens OX=9606 GN=RPL7A PE=1 SV=2;tr|Q5T8U2|Q5T8U2_HUMAN 60S ribosomal protein L7a OS=Homo sapien	Homo sapiens	3	2	2	12.6	21.545	191	0	15.238	171530	129340	55	0.0169259			611
CON__Q8N1N4-2;CON__Q7RTT2;Q8N1N4	Keratin, type II cytoskeletal 78	KRT78	KRT78	;;sp|Q8N1N4|K2C78_HUMAN Keratin, type II cytoskeletal 78 OS=Homo sapiens OX=9606 GN=KRT78 PE=1 SV=2	con_Homo sapiens	3	3	3	6.5	56.964	521	0	21.843	335200	183220	48	0.0239768		+	200
Q12981	Vesicle transport protein SEC20	BNIP1	BNIP1	sp|Q12981|SEC20_HUMAN Vesicle transport protein SEC20 OS=Homo sapiens OX=9606 GN=BNIP1 PE=1 SV=3	Homo sapiens	1	1	1	8.3	26.132	228	1	-2	26498	0	70	0	+		658
lcl|NC_017825.1_prot_YP_006272964.1_16		endoprotease	endoprotease	lcl|NC_017825.1_prot_YP_006272964.1_16 [locus_tag=YOE_gp16] [db_xref=GeneID:12657119] [protein=endoprotease] [protein_id=YP_006272964.1] [location=21146..21775] [gbkey=CDS]	AZ_Chimpanzee adenovirus Y25	1	10	10	59.8	23.84	209	0	279.09	9295800	0	70	0			355
H0Y843;A4FU69;K7EJC3	EF-hand calcium-binding domain-containing protein 5	EFCAB5	EFCAB5	tr|H0Y843|H0Y843_HUMAN EF-hand calcium-binding domain-containing protein 5 (Fragment) OS=Homo sapiens OX=9606 GN=EFCAB5 PE=1 SV=1;sp|A4FU69|EFCB5_HUMAN EF-hand calcium-binding domain-containing protein 5 OS=Homo sapiens OX=9606 GN=EFCAB5 PE=1 SV=3;tr|K7EJC	Homo sapiens	3	2	2	3.6	136.76	1185	0	11.613	402290	0	70	0			123
lcl|NC_017825.1_prot_YP_006272960.1_12;REV__lcl|NC_017825.1_prot_YP_006272960.1_12		pV	pV	lcl|NC_017825.1_prot_YP_006272960.1_12 [locus_tag=YOE_gp12] [db_xref=GeneID:12657115] [protein=pV] [protein_id=YP_006272960.1] [location=16119..17141] [gbkey=CDS]	AZ_Chimpanzee adenovirus Y25	2	28	28	76.2	38.899	340	0	323.31	485420000	2619200	14	0.342758			352
Q5T749	Keratinocyte proline-rich protein	KPRP	KPRP	sp|Q5T749|KPRP_HUMAN Keratinocyte proline-rich protein OS=Homo sapiens OX=9606 GN=KPRP PE=1 SV=1	Homo sapiens	1	6	6	16.6	64.135	579	0	43.696	1414100	1414100	20	0.185054			714
CON__Q86YZ3;Q86YZ3	Hornerin	HRNR	HRNR	;sp|Q86YZ3|HORN_HUMAN Hornerin OS=Homo sapiens OX=9606 GN=HRNR PE=1 SV=2	con_Homo sapiens	2	3	3	2.5	282.39	2850	0	20.922	1133000	1059700	21	0.138676		+	202
CON__P02769				>P02769 SWISS-PROT:P02769 (Bos taurus) Bovine serum albumin precursor	con_Bos taurus	1	5	2	7.4	69.293	607	0	14.597	824760	824760	24	0.107931		+	189
Q01469	Fatty acid-binding protein, epidermal	FABP5	FABP5	sp|Q01469|FABP5_HUMAN Fatty acid-binding protein 5 OS=Homo sapiens OX=9606 GN=FABP5 PE=1 SV=3	Homo sapiens	1	1	1	6.7	15.164	135	0.0028369	6.3987	726940	641110	25	0.083898			636
A0A286YEY1;P01876;A0A0G2JMB2	Ig alpha-1 chain C region	IGHA1	IGHA1	tr|A0A286YEY1|A0A286YEY1_HUMAN Immunoglobulin heavy constant alpha 1 (Fragment) OS=Homo sapiens OX=9606 GN=IGHA1 PE=1 SV=1;sp|P01876|IGHA1_HUMAN Immunoglobulin heavy constant alpha 1 OS=Homo sapiens OX=9606 GN=IGHA1 PE=1 SV=2	Homo sapiens	3	3	3	9.5	42.848	398	0	17.513	615000	615000	26	0.0804812			72
E7EQB2;E7ER44;P02788	Lactotransferrin;Lactoferricin-H;Kaliocin-1;Lactoferroxin-A;Lactoferroxin-B;Lactoferroxin-C	LTF	LTF	tr|E7EQB2|E7EQB2_HUMAN Lactotransferrin (Fragment) OS=Homo sapiens OX=9606 GN=LTF PE=1 SV=1;tr|E7ER44|E7ER44_HUMAN Lactotransferrin OS=Homo sapiens OX=9606 GN=LTF PE=1 SV=1;sp|P02788|TRFL_HUMAN Lactotransferrin OS=Homo sapiens OX=9606 GN=LTF PE=1 SV=6	Homo sapiens	3	6	6	15.2	76.625	696	0	64.403	427980	427980	29	0.056007			222
A0A0A0MS07;A0A0A0MS08;P01857	Ig gamma-1 chain C region	IGHG1	IGHG1	tr|A0A0A0MS07|A0A0A0MS07_HUMAN Immunoglobulin heavy constant gamma 1 (Fragment) OS=Homo sapiens OX=9606 GN=IGHG1 PE=1 SV=1;tr|A0A0A0MS08|A0A0A0MS08_HUMAN Immunoglobulin heavy constant gamma 1 (Fragment) OS=Homo sapiens OX=9606 GN=IGHG1 PE=1 SV=1;sp|P01857|	Homo sapiens	3	4	2	20.3	31.983	295	0	23.605	395400	395400	30	0.0517435			38
CON__Q04695;Q04695;CON__Q9QWL7;F5GWP8;K7EPJ9;K7ESE1	Keratin, type I cytoskeletal 17	KRT17	KRT17	;sp|Q04695|K1C17_HUMAN Keratin, type I cytoskeletal 17 OS=Homo sapiens OX=9606 GN=KRT17 PE=1 SV=2;;tr|F5GWP8|F5GWP8_HUMAN Keratin, type I cytoskeletal 17 OS=Homo sapiens OX=9606 GN=KRT17 PE=1 SV=2;tr|K7EPJ9|K7EPJ9_HUMAN Keratin, type I cytoskeletal 17 (Fra	con_Homo sapiens	6	12	3	27.5	48.105	432	0	26.759	310580	310580	33	0.0406436		+	196
P25311	Zinc-alpha-2-glycoprotein	AZGP1	AZGP1	sp|P25311|ZA2G_HUMAN Zinc-alpha-2-glycoprotein OS=Homo sapiens OX=9606 GN=AZGP1 PE=1 SV=2	Homo sapiens	1	1	1	3.4	34.258	298	0.0053121	6.061	303600	303600	35	0.0397302			502
P04406;E7EUT5	Glyceraldehyde-3-phosphate dehydrogenase	GAPDH	GAPDH	sp|P04406|G3P_HUMAN Glyceraldehyde-3-phosphate dehydrogenase OS=Homo sapiens OX=9606 GN=GAPDH PE=1 SV=3;tr|E7EUT5|E7EUT5_HUMAN Glyceraldehyde-3-phosphate dehydrogenase OS=Homo sapiens OX=9606 GN=GAPDH PE=1 SV=1	Homo sapiens	2	19	19	74.6	36.053	335	0	323.31	112780000	278250	36	0.0364128			429
P14923;C9JTX4;C9J826;C9JK18;C9JKY1	Junction plakoglobin	JUP	JUP	sp|P14923|PLAK_HUMAN Junction plakoglobin OS=Homo sapiens OX=9606 GN=JUP PE=1 SV=3	Homo sapiens	5	6	6	9	81.744	745	0	66.034	495550	271580	37	0.03554			476
CON__P04259				>P04259 SWISS-PROT:P04259 Tax_Id=9606 Gene_Symbol=KRT6B Keratin, type II cytoskeletal 6B	con	1	26	0	42.2	59.998	564	0	39.049	266740	266740	38	0.0349066		+	190
CON__P02662				>P02662 SWISS-PROT:P02662 Alpha-S1-casein - Bos taurus (Bovine).	con_Bos taurus	1	2	2	11.1	22.975	199	0	23.175	592930	243490	42	0.031864		+	185
CON__P02538;P02538;CON__O95678;O95678;CON__Q8VED5	Keratin, type II cytoskeletal 6A	KRT6A	KRT6A	;sp|P02538|K2C6A_HUMAN Keratin, type II cytoskeletal 6A OS=Homo sapiens OX=9606 GN=KRT6A PE=1 SV=3	con_Homo sapiens	5	26	1	42.2	60.044	564	1	-2	225310	225310	43	0.0294849	+	+	184
P01834;A0A5H1ZRQ3	Ig kappa chain C region	IGKC	IGKC	sp|P01834|IGKC_HUMAN Immunoglobulin kappa constant OS=Homo sapiens OX=9606 GN=IGKC PE=1 SV=2;tr|A0A5H1ZRQ3|A0A5H1ZRQ3_HUMAN Immunoglobulin kappa constant (Fragment) OS=Homo sapiens OX=9606 GN=IGKC PE=1 SV=1	Homo sapiens	2	3	3	48.6	11.765	107	0	23.309	221480	221480	44	0.0289837			422
A0A5F9ZH78;P05089	Arginase-1	ARG1	ARG1	tr|A0A5F9ZH78|A0A5F9ZH78_HUMAN Arginase-1 OS=Homo sapiens OX=9606 GN=ARG1 PE=1 SV=1;sp|P05089|ARGI1_HUMAN Arginase-1 OS=Homo sapiens OX=9606 GN=ARG1 PE=1 SV=2	Homo sapiens	2	2	2	9.3	25.66	237	0	14.127	211690	211690	45	0.0277025			106
CON__P02754				>P02754 SWISS-PROT:P02754 Beta-lactoglobulin - Bos taurus (Bovine).	con_Bos taurus	1	1	1	8.6	18.281	162	0	34.629	196040	196040	46	0.0256545		+	188
P05109	Protein S100-A8;Protein S100-A8, N-terminally processed	S100A8	S100A8	sp|P05109|S10A8_HUMAN Protein S100-A8 OS=Homo sapiens OX=9606 GN=S100A8 PE=1 SV=1	Homo sapiens	1	1	1	11.8	10.834	93	0	11.835	348310	176890	49	0.0231485			430
P81605	Dermcidin;Survival-promoting peptide;DCD-1	DCD	DCD	sp|P81605|DCD_HUMAN Dermcidin OS=Homo sapiens OX=9606 GN=DCD PE=1 SV=2	Homo sapiens	1	2	2	12.7	11.284	110	0	19.999	439910	172100	50	0.0225216			634
P31944	Caspase-14;Caspase-14 subunit p17, mature form;Caspase-14 subunit p10, mature form;Caspase-14 subunit p20, intermediate form;Caspase-14 subunit p8, intermediate form	CASP14	CASP14	sp|P31944|CASPE_HUMAN Caspase-14 OS=Homo sapiens OX=9606 GN=CASP14 PE=1 SV=2	Homo sapiens	1	3	3	14	27.679	242	0	24.753	333810	166550	51	0.0217953			529
CON__P02663				>P02663 SWISS-PROT:P02663 Alpha-S2-casein [Contains: Casocidin-1 - Bos taurus (Bovine).	con_Bos taurus	1	1	1	3.9	24.348	207	0.0052562	6.0047	151390	151390	52	0.0198115		+	186
A0A590UK99;A0A590UIX5;A0A590UJF8;A0A590UJZ9;A0A590UJ76;Q9UGM3	Deleted in malignant brain tumors 1 protein	DMBT1	DMBT1	tr|A0A590UK99|A0A590UK99_HUMAN Deleted in malignant brain tumors 1 protein (Fragment) OS=Homo sapiens OX=9606 GN=DMBT1 PE=1 SV=1;tr|A0A590UIX5|A0A590UIX5_HUMAN Deleted in malignant brain tumors 1 protein (Fragment) OS=Homo sapiens OX=9606 GN=DMBT1 PE=1 SV=	Homo sapiens	6	1	1	10.8	13.783	130	0	7.5009	100890	100890	56	0.0132028			102
CON__Q6KB66-1;CON__Q0VBK2;Q6KB66	Keratin, type II cytoskeletal 80	KRT80	KRT80	;;sp|Q6KB66|K2C80_HUMAN Keratin, type II cytoskeletal 80 OS=Homo sapiens OX=9606 GN=KRT80 PE=1 SV=2	con_Homo sapiens	3	1	1	2.2	50.525	452	0	8.2898	100110	100110	57	0.0131008		+	197
P12273	Prolactin-inducible protein	PIP	PIP	sp|P12273|PIP_HUMAN Prolactin-inducible protein OS=Homo sapiens OX=9606 GN=PIP PE=1 SV=1	Homo sapiens	1	1	1	6.8	16.572	146	0.002805	6.375	99611	99611	58	0.0130355			460
P04040	Catalase	CAT	CAT	sp|P04040|CATA_HUMAN Catalase OS=Homo sapiens OX=9606 GN=CAT PE=1 SV=3	Homo sapiens	1	1	1	2.5	59.755	527	0.0040268	6.1322	93086	93086	59	0.0121816			425
P15924	Desmoplakin	DSP	DSP	sp|P15924|DESP_HUMAN Desmoplakin OS=Homo sapiens OX=9606 GN=DSP PE=1 SV=3	Homo sapiens	1	6	6	2.3	331.77	2871	0	34.276	501170	91092	60	0.0119206			477
Q2L6G8;G8JLG2;Q15517	Corneodesmosin	CDSN	CDSN	tr|Q2L6G8|Q2L6G8_HUMAN Corneodesmosin OS=Homo sapiens OX=9606 GN=CDSN PE=1 SV=1;tr|G8JLG2|G8JLG2_HUMAN Corneodesmosin OS=Homo sapiens OX=9606 GN=CDSN PE=1 SV=1;sp|Q15517|CDSN_HUMAN Corneodesmosin OS=Homo sapiens OX=9606 GN=CDSN PE=1 SV=3	Homo sapiens	3	2	2	4.3	51.539	529	0	11.505	194760	88191	61	0.011541			284
A0A494C0J7;Q08188	Protein-glutamine gamma-glutamyltransferase E;Protein-glutamine gamma-glutamyltransferase E 50 kDa catalytic chain;Protein-glutamine gamma-glutamyltransferase E 27 kDa non-catalytic chain	TGM3	TGM3	tr|A0A494C0J7|A0A494C0J7_HUMAN TGc domain-containing protein OS=Homo sapiens OX=9606 PE=3 SV=1;sp|Q08188|TGM3_HUMAN Protein-glutamine gamma-glutamyltransferase E OS=Homo sapiens OX=9606 GN=TGM3 PE=1 SV=4	Homo sapiens	2	1	1	2.2	78.856	712	0	8.7427	86273	86273	62	0.01129			96
P03973	Antileukoproteinase	SLPI	SLPI	sp|P03973|SLPI_HUMAN Antileukoproteinase OS=Homo sapiens OX=9606 GN=SLPI PE=1 SV=2	Homo sapiens	1	1	1	9.1	14.326	132	0.002809	6.382	83049	83049	63	0.0108681			424
H0YMM1;H0YKS4;H0YMD0;H0YMU9;H0YN42;P07355;H0YLE2;H0YN52;H0YNA0;H0YN28;H0YL33;H0YNP5;H0YM50;A6NMY6;H0YMD9;H0YKV8;H0YKL9;H0YKZ7;H0YLV6;H0YMT9;H0YKX9;H0YMW4	Annexin;Annexin A2;Putative annexin A2-like protein	ANXA2;ANXA2P2	ANXA2	tr|H0YMM1|H0YMM1_HUMAN Annexin (Fragment) OS=Homo sapiens OX=9606 GN=ANXA2 PE=1 SV=1;tr|H0YKS4|H0YKS4_HUMAN Annexin (Fragment) OS=Homo sapiens OX=9606 GN=ANXA2 PE=1 SV=1;tr|H0YMD0|H0YMD0_HUMAN Annexin (Fragment) OS=Homo sapiens OX=9606 GN=ANXA2 PE=1 SV=1;t	Homo sapiens	22	3	3	26.8	16.458	149	0	62.306	80185	80185	64	0.0104933			297
J3KRG2;Q96QA5	Gasdermin-A	GSDMA	GSDMA	tr|J3KRG2|J3KRG2_HUMAN Gasdermin-A (Fragment) OS=Homo sapiens OX=9606 GN=GSDMA PE=1 SV=8;sp|Q96QA5|GSDMA_HUMAN Gasdermin-A OS=Homo sapiens OX=9606 GN=GSDMA PE=1 SV=4	Homo sapiens	2	1	1	5.1	17.791	158	0.0040431	6.1483	79510	79510	65	0.010405			324
E9PC84;J3QSU6;P24821;F5H7V9;H0YGZ3	Tenascin	TNC	TNC	tr|E9PC84|E9PC84_HUMAN Tenascin OS=Homo sapiens OX=9606 GN=TNC PE=1 SV=1;tr|J3QSU6|J3QSU6_HUMAN Tenascin OS=Homo sapiens OX=9606 GN=TNC PE=1 SV=1;sp|P24821|TENA_HUMAN Tenascin OS=Homo sapiens OX=9606 GN=TNC PE=1 SV=3;tr|F5H7V9|F5H7V9_HUMAN Tenascin OS=Homo	Homo sapiens	5	7	7	4.7	210.85	1928	0	56.712	1693900	44067	66	0.00576677			232
U3KQB1;E5RH64;Q969T7	7-methylguanosine phosphate-specific 5-nucleotidase	NT5C3B	NT5C3B	tr|U3KQB1|U3KQB1_HUMAN 7-methylguanosine phosphate-specific 5-nucleotidase (Fragment) OS=Homo sapiens OX=9606 GN=NT5C3B PE=1 SV=1;tr|E5RH64|E5RH64_HUMAN 7-methylguanosine phosphate-specific 5-nucleotidase OS=Homo sapiens OX=9606 GN=NT5C3B PE=1 SV=1;sp|Q9	Homo sapiens	3	1	1	7.6	12.009	105	0.007732	5.9015	43091	43091	67	0.00563905			216
O15018	PDZ domain-containing protein 2;Processed PDZ domain-containing protein 2	PDZD2	PDZD2	sp|O15018|PDZD2_HUMAN PDZ domain-containing protein 2 OS=Homo sapiens OX=9606 GN=PDZD2 PE=1 SV=4	Homo sapiens	1	1	1	0.3	301.64	2839	1	-2	715230	30879	69	0.00404094	+		389
P07900;G3V2J8;Q14568;Q58FG0;Q58FG1	Heat shock protein HSP 90-alpha	HSP90AA1	HSP90AA1	sp|P07900|HS90A_HUMAN Heat shock protein HSP 90-alpha OS=Homo sapiens OX=9606 GN=HSP90AA1 PE=1 SV=5	Homo sapiens	5	63	41	64.2	84.659	732	0	323.31	3449100000	0	70	0			442
lcl|NC_017825.1_prot_YP_006272966.1_18		100kDa	100kDa	lcl|NC_017825.1_prot_YP_006272966.1_18 [locus_tag=YOE_gp18] [db_xref=GeneID:12657121] [protein=100kDa] [protein_id=YP_006272966.1] [location=23419..25827] [gbkey=CDS]	AZ_Chimpanzee adenovirus Y25	1	51	51	61.2	88.74	802	0	323.31	1775200000	0	70	0			357
P08238;Q58FF7	Heat shock protein HSP 90-beta	HSP90AB1	HSP90AB1	sp|P08238|HS90B_HUMAN Heat shock protein HSP 90-beta OS=Homo sapiens OX=9606 GN=HSP90AB1 PE=1 SV=4	Homo sapiens	2	63	33	67.1	83.263	724	0	323.31	1289600000	0	70	0			443
P55072;C9IZA5;C9JUP7	Transitional endoplasmic reticulum ATPase	VCP	VCP	sp|P55072|TERA_HUMAN Transitional endoplasmic reticulum ATPase OS=Homo sapiens OX=9606 GN=VCP PE=1 SV=4	Homo sapiens	3	55	55	74.1	89.321	806	0	323.31	1028700000	0	70	0			584
P08670;B0YJC4;B0YJC5;A0A1B0GTT5;P17661;H7C5W5;P41219;A0A1B0GVG8;E7EMV2;E7ESP9;Q16352;P07197;F8W835;P12036	Vimentin	VIM	VIM	sp|P08670|VIME_HUMAN Vimentin OS=Homo sapiens OX=9606 GN=VIM PE=1 SV=4;tr|B0YJC4|B0YJC4_HUMAN Vimentin OS=Homo sapiens OX=9606 GN=VIM PE=1 SV=1;tr|B0YJC5|B0YJC5_HUMAN Vimentin OS=Homo sapiens OX=9606 GN=VIM PE=1 SV=1	Homo sapiens	14	52	50	77.9	53.651	466	0	323.31	805160000	0	70	0			445
P62258;B4DJF2;I3L3T1;K7EIT4;K7EM20;I3L0W5	14-3-3 protein epsilon	YWHAE	YWHAE	sp|P62258|1433E_HUMAN 14-3-3 protein epsilon OS=Homo sapiens OX=9606 GN=YWHAE PE=1 SV=1	Homo sapiens	6	26	24	89	29.174	255	0	323.31	783190000	0	70	0			606
P14625;Q96GW1;A0A1W2PRR1;H0YIV0;Q58FF3;F8W026	Endoplasmin	HSP90B1	HSP90B1	sp|P14625|ENPL_HUMAN Endoplasmin OS=Homo sapiens OX=9606 GN=HSP90B1 PE=1 SV=1	Homo sapiens	6	48	46	57.2	92.468	803	0	323.31	598000000	0	70	0			474
Q08380;K7EP36;K7ESM3;K7EKQ5;K7EJY8;K7ERZ6;K7EJD3	Galectin-3-binding protein	LGALS3BP	LGALS3BP	sp|Q08380|LG3BP_HUMAN Galectin-3-binding protein OS=Homo sapiens OX=9606 GN=LGALS3BP PE=1 SV=1	Homo sapiens	7	16	16	35.7	65.33	585	0	323.31	350720000	0	70	0			646
P68371;Q3ZCM7;M0R2D3;M0QY85;M0QZL7;M0QYM7;M0R0X0;M0QY37;M0QX14;M0R042;M0R2T4;A0A075B724	Tubulin beta-4B chain	TUBB4B	TUBB4B	sp|P68371|TBB4B_HUMAN Tubulin beta-4B chain OS=Homo sapiens OX=9606 GN=TUBB4B PE=1 SV=1	Homo sapiens	12	26	1	73.9	49.83	445	0	323.31	321740000	0	70	0			631
P63104;B0AZS6;E7EX29;B7Z2E6;H0YB80;E7ESK7;E5RIR4;E9PD24;E7EVZ2;E5RGE1	14-3-3 protein zeta/delta	YWHAZ	YWHAZ	sp|P63104|1433Z_HUMAN 14-3-3 protein zeta/delta OS=Homo sapiens OX=9606 GN=YWHAZ PE=1 SV=1;tr|B0AZS6|B0AZS6_HUMAN 14-3-3 protein zeta/delta OS=Homo sapiens OX=9606 GN=YWHAZ PE=1 SV=1;tr|E7EX29|E7EX29_HUMAN 14-3-3 protein zeta/delta (Fragment) OS=Homo sapie	Homo sapiens	10	22	18	77.6	27.745	245	0	323.31	306050000	0	70	0			620
lcl|NC_017825.1_prot_YP_006272965.1_17		DNA binding	DNA binding	lcl|NC_017825.1_prot_YP_006272965.1_17 [locus_tag=YOE_gp17] [db_xref=GeneID:12657120] [protein=DNA binding protein] [protein_id=YP_006272965.1] [location=complement(21852..23390)] [gbkey=CDS]	AZ_Chimpanzee adenovirus Y25	1	23	23	51.4	57.286	512	0	323.31	284790000	0	70	0			356
O43707;F5GXS2;H7C144;K7EJH8;A0A494C1A0;P35609;A0A087WSZ2;Q08043;G3V5M4;F6THM6;G3V2E8;G3V2X9;A0A494C033;A0A494C166;A0A494C060;A0A494C0Q3;K7EP19;M0QZQ3;C9JY79;Q9H254	Alpha-actinin-4	ACTN4	ACTN4	sp|O43707|ACTN4_HUMAN Alpha-actinin-4 OS=Homo sapiens OX=9606 GN=ACTN4 PE=1 SV=2;tr|F5GXS2|F5GXS2_HUMAN Alpha-actinin-4 OS=Homo sapiens OX=9606 GN=ACTN4 PE=1 SV=2	Homo sapiens	20	43	31	56.5	104.85	911	0	323.31	240290000	0	70	0			399
lcl|NC_017825.1_prot_YP_006272973.1_25		fiber	fiber	lcl|NC_017825.1_prot_YP_006272973.1_25 [locus_tag=YOE_gp25] [db_xref=GeneID:12657128] [protein=fiber] [protein_id=YP_006272973.1] [location=32290..33621] [gbkey=CDS]	AZ_Chimpanzee adenovirus Y25	1	20	20	53.5	47.304	443	0	323.31	179080000	0	70	0			360
P05388;F8VWS0;F8VU65;F8VW21;F8VPE8;G3V210;F8VZS0;Q8NHW5;F8W1K8;F8VQY6;F8VRK7;F8VWV4;F8VS58	60S acidic ribosomal protein P0;60S acidic ribosomal protein P0-like	RPLP0;RPLP0P6	RPLP0	sp|P05388|RLA0_HUMAN 60S acidic ribosomal protein P0 OS=Homo sapiens OX=9606 GN=RPLP0 PE=1 SV=1;tr|F8VWS0|F8VWS0_HUMAN 60S acidic ribosomal protein P0 OS=Homo sapiens OX=9606 GN=RPLP0 PE=1 SV=1;tr|F8VU65|F8VU65_HUMAN 60S acidic ribosomal protein P0 (Fragme	Homo sapiens	13	18	18	65	34.273	317	0	323.31	176730000	0	70	0			435
Q5JP53;P07437;Q5ST81;A0A075B736;Q5SQY0;A6NNZ2;G3V2A3;CON__ENSEMBL:ENSBTAP00000025008;Q9H4B7;G3V5W4;G3V2R8;G3V3R4;G3V2N6	Tubulin beta chain	TUBB	TUBB	tr|Q5JP53|Q5JP53_HUMAN Tubulin beta chain OS=Homo sapiens OX=9606 GN=TUBB PE=1 SV=1;sp|P07437|TBB5_HUMAN Tubulin beta chain OS=Homo sapiens OX=9606 GN=TUBB PE=1 SV=2;tr|Q5ST81|Q5ST81_HUMAN Tubulin beta chain OS=Homo sapiens OX=9606 GN=TUBB PE=1 SV=1	Homo sapiens	13	26	6	74.2	47.766	426	0	323.31	144480000	0	70	0			439
P07237;H7BZ94;I3L398;I3L312;H0Y3Z3;I3L4M2;I3NI03;I3L3U6;I3L0S0;I3L3P5;I3L1Y5;I3L514	Protein disulfide-isomerase	P4HB	P4HB	sp|P07237|PDIA1_HUMAN Protein disulfide-isomerase OS=Homo sapiens OX=9606 GN=P4HB PE=1 SV=3;tr|H7BZ94|H7BZ94_HUMAN Protein disulfide-isomerase OS=Homo sapiens OX=9606 GN=P4HB PE=1 SV=2;tr|I3L398|I3L398_HUMAN Protein disulfide-isomerase (Fragment) OS=Homo s	Homo sapiens	12	31	31	62.8	57.116	508	0	323.31	141660000	0	70	0			438
Q5VTE0;P68104;A0A087WVQ9;A0A087WV01;A0A2U3TZH3;Q05639;A0A2R8Y488;Q5JR01;A0A2R8Y660;A6PW80;A0A6Q8PFK6;A0A2R8YDN5	Putative elongation factor 1-alpha-like 3;Elongation factor 1-alpha 1;Elongation factor 1-alpha;Elongation factor 1-alpha 2	EEF1A1P5;EEF1A1;EEF1A2	EEF1A1P5	sp|Q5VTE0|EF1A3_HUMAN Putative elongation factor 1-alpha-like 3 OS=Homo sapiens OX=9606 GN=EEF1A1P5 PE=5 SV=1;sp|P68104|EF1A1_HUMAN Elongation factor 1-alpha 1 OS=Homo sapiens OX=9606 GN=EEF1A1 PE=1 SV=1;tr|A0A087WVQ9|A0A087WVQ9_HUMAN Elongation factor 1-a	Homo sapiens	12	15	15	46.5	50.184	462	0	237.78	134780000	0	70	0			628
P49321;Q5T624;H0YDS9;E9PI86;E9PRH9;H0YF33;E9PPR5;E9PPQ8	Nuclear autoantigenic sperm protein	NASP	NASP	sp|P49321|NASP_HUMAN Nuclear autoantigenic sperm protein OS=Homo sapiens OX=9606 GN=NASP PE=1 SV=2	Homo sapiens	8	26	26	49.2	85.237	788	0	323.31	114920000	0	70	0			558
Q04917;A2IDB2;F8WEB6;A2IDB1	14-3-3 protein eta	YWHAH	YWHAH	sp|Q04917|1433F_HUMAN 14-3-3 protein eta OS=Homo sapiens OX=9606 GN=YWHAH PE=1 SV=4;tr|A2IDB2|A2IDB2_HUMAN 14-3-3 protein eta (Fragment) OS=Homo sapiens OX=9606 GN=YWHAH PE=1 SV=1	Homo sapiens	4	19	16	75.2	28.218	246	0	323.31	114260000	0	70	0			643
Q13813;A0A0D9SF54;A0A0D9SGF6;A0A0D9SFF6;A0A0D9SFH4;A0A1B0GTB7;A0A1B0GUH3;A0A1B0GV13;A0A5F9ZHC3	Spectrin alpha chain, non-erythrocytic 1	SPTAN1	SPTAN1	sp|Q13813|SPTN1_HUMAN Spectrin alpha chain, non-erythrocytic 1 OS=Homo sapiens OX=9606 GN=SPTAN1 PE=1 SV=3;tr|A0A0D9SF54|A0A0D9SF54_HUMAN Spectrin alpha chain, non-erythrocytic 1 OS=Homo sapiens OX=9606 GN=SPTAN1 PE=1 SV=1;tr|A0A0D9SGF6|A0A0D9SGF6_HUMAN Sp	Homo sapiens	9	95	95	45.3	284.54	2472	0	323.31	114140000	0	70	0			669
lcl|NC_017825.1_prot_YP_006272953.1_5		IVa2	IVa2	lcl|NC_017825.1_prot_YP_006272953.1_5 [locus_tag=YOE_gp05] [db_xref=GeneID:12657139] [protein=IVa2] [protein_id=YP_006272953.1] [location=complement(join(3978..5311,5590..5602))] [gbkey=CDS]	AZ_Chimpanzee adenovirus Y25	1	21	20	61.2	50.364	448	0	323.31	106680000	0	70	0			345
P27797;K7EJB9;K7EL50	Calreticulin	CALR	CALR	sp|P27797|CALR_HUMAN Calreticulin OS=Homo sapiens OX=9606 GN=CALR PE=1 SV=1;tr|K7EJB9|K7EJB9_HUMAN Calreticulin (Fragment) OS=Homo sapiens OX=9606 GN=CALR PE=1 SV=1	Homo sapiens	3	21	21	64.3	48.141	417	0	323.31	97926000	0	70	0			514
K7EM02;K7EIJ8;Q8IYT4	Katanin p60 ATPase-containing subunit A-like 2	KATNAL2	KATNAL2	tr|K7EM02|K7EM02_HUMAN Katanin p60 ATPase-containing subunit A-like 2 (Fragment) OS=Homo sapiens OX=9606 GN=KATNAL2 PE=1 SV=1;tr|K7EIJ8|K7EIJ8_HUMAN Katanin p60 ATPase-containing subunit A-like 2 (Fragment) OS=Homo sapiens OX=9606 GN=KATNAL2 PE=1 SV=1;sp|Q	Homo sapiens	3	1	1	9.4	13.999	128	0	7.2307	90466000	0	70	0			331
P31946;Q4VY20;Q4VY19;A0A0J9YWE8;A0A0J9YWZ2	14-3-3 protein beta/alpha;14-3-3 protein beta/alpha, N-terminally processed	YWHAB	YWHAB	sp|P31946|1433B_HUMAN 14-3-3 protein beta/alpha OS=Homo sapiens OX=9606 GN=YWHAB PE=1 SV=3	Homo sapiens	5	18	13	81.3	28.082	246	0	323.31	84261000	0	70	0			530
P13667;A0A499FI48	Protein disulfide-isomerase A4	PDIA4	PDIA4	sp|P13667|PDIA4_HUMAN Protein disulfide-isomerase A4 OS=Homo sapiens OX=9606 GN=PDIA4 PE=1 SV=2;tr|A0A499FI48|A0A499FI48_HUMAN Protein disulfide-isomerase OS=Homo sapiens OX=9606 GN=PDIA4 PE=1 SV=1	Homo sapiens	2	32	32	48.2	72.932	645	0	323.31	78922000	0	70	0			467
lcl|NC_017825.1_prot_YP_006272952.1_4		pIX	pIX	lcl|NC_017825.1_prot_YP_006272952.1_4 [locus_tag=YOE_gp04] [db_xref=GeneID:12657138] [protein=pIX] [protein_id=YP_006272952.1] [location=3491..3919] [gbkey=CDS]	AZ_Chimpanzee adenovirus Y25	1	7	7	93	14.459	142	0	323.31	75149000	0	70	0			344
Q14152	Eukaryotic translation initiation factor 3 subunit A	EIF3A	EIF3A	sp|Q14152|EIF3A_HUMAN Eukaryotic translation initiation factor 3 subunit A OS=Homo sapiens OX=9606 GN=EIF3A PE=1 SV=1	Homo sapiens	1	36	36	29.7	166.57	1382	0	323.31	74048000	0	70	0			676
P61981	14-3-3 protein gamma;14-3-3 protein gamma, N-terminally processed	YWHAG	YWHAG	sp|P61981|1433G_HUMAN 14-3-3 protein gamma OS=Homo sapiens OX=9606 GN=YWHAG PE=1 SV=2	Homo sapiens	1	18	14	76.1	28.302	247	0	323.31	73063000	0	70	0			601
Q96FX7	tRNA (adenine(58)-N(1))-methyltransferase catalytic subunit TRMT61A	TRMT61A	TRMT61A	sp|Q96FX7|TRM61_HUMAN tRNA (adenine(58)-N(1))-methyltransferase catalytic subunit TRMT61A OS=Homo sapiens OX=9606 GN=TRMT61A PE=1 SV=1	Homo sapiens	1	2	2	10.7	31.381	289	0	12.063	71166000	0	70	0			758
Q9Y265;E7ETR0;H7C4G5;H7C4I3;J3QLR1	RuvB-like 1	RUVBL1	RUVBL1	sp|Q9Y265|RUVB1_HUMAN RuvB-like 1 OS=Homo sapiens OX=9606 GN=RUVBL1 PE=1 SV=1;tr|E7ETR0|E7ETR0_HUMAN RuvB-like helicase OS=Homo sapiens OX=9606 GN=RUVBL1 PE=1 SV=1	Homo sapiens	5	26	26	68.9	50.227	456	0	323.31	63754000	0	70	0			817
P55884;C9JZG1;C9JQN7	Eukaryotic translation initiation factor 3 subunit B	EIF3B	EIF3B	sp|P55884|EIF3B_HUMAN Eukaryotic translation initiation factor 3 subunit B OS=Homo sapiens OX=9606 GN=EIF3B PE=1 SV=3	Homo sapiens	3	24	24	37	92.48	814	0	323.31	62993000	0	70	0			586
P27824;H0Y9Q7;D6RGY2;D6RFL1;H0Y9H1;D6RAQ8;D6RAU8;D6RB85;D6RDP7;D6RHJ3;D6RD16	Calnexin	CANX	CANX	sp|P27824|CALX_HUMAN Calnexin OS=Homo sapiens OX=9606 GN=CANX PE=1 SV=2	Homo sapiens	11	13	13	28	67.567	592	0	272.76	61392000	0	70	0			515
P67936;A0A2R8Y5V9;A0A2R8YGX3;A0A2R8YE05;K7ENT6;A0A2R8YH90;A0A2R8YHD2;A0A2R8YEU4;A0A5F9UN72;Q5TCU3;CON__Q3SX28;A7XZE4;P07951;K7EPB9;A0A590UJB9;A0A590UK79;U3KQK2	Tropomyosin alpha-4 chain	TPM4	TPM4	sp|P67936|TPM4_HUMAN Tropomyosin alpha-4 chain OS=Homo sapiens OX=9606 GN=TPM4 PE=1 SV=3;tr|A0A2R8Y5V9|A0A2R8Y5V9_HUMAN Tropomyosin alpha-4 chain OS=Homo sapiens OX=9606 GN=TPM4 PE=1 SV=1;tr|A0A2R8YGX3|A0A2R8YGX3_HUMAN Tropomyosin alpha-4 chain OS=Homo sap	Homo sapiens	17	27	20	68.5	28.521	248	0	323.31	55292000	0	70	0			626
P13639	Elongation factor 2	EEF2	EEF2	sp|P13639|EF2_HUMAN Elongation factor 2 OS=Homo sapiens OX=9606 GN=EEF2 PE=1 SV=4	Homo sapiens	1	22	21	38.2	95.337	858	0	323.31	55280000	0	70	0			466
Q58FF8	Putative heat shock protein HSP 90-beta 2	HSP90AB2P	HSP90AB2P	sp|Q58FF8|H90B2_HUMAN Putative heat shock protein HSP 90-beta 2 OS=Homo sapiens OX=9606 GN=HSP90AB2P PE=1 SV=2	Homo sapiens	1	15	2	25.2	44.348	381	0	62.221	55052000	0	70	0			707
P60842;J3KT12;J3KTB5;J3QS69;J3KSZ0;J3QL43;J3QR64;J3KTN0;J3QLN6;E7EQG2;Q14240;J3QKZ9;J3KS25;J3KS93;J3KT04;E7EMV8;J3KSN7;J3QL52	Eukaryotic initiation factor 4A-I	EIF4A1	EIF4A1	sp|P60842|IF4A1_HUMAN Eukaryotic initiation factor 4A-I OS=Homo sapiens OX=9606 GN=EIF4A1 PE=1 SV=1;tr|J3KT12|J3KT12_HUMAN RNA helicase OS=Homo sapiens OX=9606 GN=EIF4A1 PE=1 SV=1;tr|J3KTB5|J3KTB5_HUMAN RNA helicase (Fragment) OS=Homo sapiens OX=9606 GN=EI	Homo sapiens	18	18	17	56.7	46.153	406	0	323.31	52996000	0	70	0			592
P14618;H3BTN5;B4DNK4;H3BQ34;H3BR70;H3BT25;H3BUW1;H3BTJ2;H3BU13;H3BN34;H3BQZ3;P30613	Pyruvate kinase PKM;Pyruvate kinase	PKM	PKM	sp|P14618|KPYM_HUMAN Pyruvate kinase PKM OS=Homo sapiens OX=9606 GN=PKM PE=1 SV=4;tr|H3BTN5|H3BTN5_HUMAN Pyruvate kinase (Fragment) OS=Homo sapiens OX=9606 GN=PKM PE=1 SV=1;tr|B4DNK4|B4DNK4_HUMAN Pyruvate kinase OS=Homo sapiens OX=9606 GN=PKM PE=1 SV=1;tr|	Homo sapiens	12	20	20	46.7	57.936	531	0	323.31	52826000	0	70	0			473
Q15393;I3L4G7;J3QRB2;J3QL37;H3BMB0	Splicing factor 3B subunit 3	SF3B3	SF3B3	sp|Q15393|SF3B3_HUMAN Splicing factor 3B subunit 3 OS=Homo sapiens OX=9606 GN=SF3B3 PE=1 SV=4	Homo sapiens	5	33	33	37.6	135.58	1217	0	323.31	50158000	0	70	0			690
P26641	Elongation factor 1-gamma	EEF1G	EEF1G	sp|P26641|EF1G_HUMAN Elongation factor 1-gamma OS=Homo sapiens OX=9606 GN=EEF1G PE=1 SV=3	Homo sapiens	1	15	15	33.9	50.118	437	0	218.6	48329000	0	70	0			511
O14744;H0YJX6;G3V580;H0YJ77;G3V5L5;G3V2L6;G3V2X6;C9JSX3;G3V5T6;H0YJD3;G3V507;G3V2F5;H7BZ44	Protein arginine N-methyltransferase 5;Protein arginine N-methyltransferase 5, N-terminally processed	PRMT5	PRMT5	sp|O14744|ANM5_HUMAN Protein arginine N-methyltransferase 5 OS=Homo sapiens OX=9606 GN=PRMT5 PE=1 SV=4;tr|H0YJX6|H0YJX6_HUMAN Protein arginine N-methyltransferase 5 (Fragment) OS=Homo sapiens OX=9606 GN=PRMT5 PE=1 SV=1	Homo sapiens	13	20	20	36.7	72.683	637	0	265.81	46516000	0	70	0			383
Q9Y230;M0R0Y3;X6R2L4;M0QXI6;M0R0Z0;M0QXZ7;A0A1W2PS48	RuvB-like 2	RUVBL2	RUVBL2	sp|Q9Y230|RUVB2_HUMAN RuvB-like 2 OS=Homo sapiens OX=9606 GN=RUVBL2 PE=1 SV=3;tr|M0R0Y3|M0R0Y3_HUMAN RuvB-like helicase OS=Homo sapiens OX=9606 GN=RUVBL2 PE=1 SV=1	Homo sapiens	7	30	30	73.2	51.156	463	0	323.31	46226000	0	70	0			815
P60228;E5RGA2;H0YBR5;E5RHS5;E5RIT4;H0YAW4;E5RII3;E5RIP5;E5RJ25;H0YBP5	Eukaryotic translation initiation factor 3 subunit E	EIF3E	EIF3E	sp|P60228|EIF3E_HUMAN Eukaryotic translation initiation factor 3 subunit E OS=Homo sapiens OX=9606 GN=EIF3E PE=1 SV=1;tr|E5RGA2|E5RGA2_HUMAN Eukaryotic translation initiation factor 3 subunit E OS=Homo sapiens OX=9606 GN=EIF3E PE=1 SV=1	Homo sapiens	10	23	23	58.2	52.22	445	0	323.31	45720000	0	70	0			590
C9JIF9;P13798;H7C393;H7C1U0;C9JLK2;F8WEH5;H0YFE5	Acylamino-acid-releasing enzyme	APEH	APEH	tr|C9JIF9|C9JIF9_HUMAN Acyl-peptide hydrolase OS=Homo sapiens OX=9606 GN=APEH PE=1 SV=1;sp|P13798|ACPH_HUMAN Acylamino-acid-releasing enzyme OS=Homo sapiens OX=9606 GN=APEH PE=1 SV=4	Homo sapiens	7	18	18	37.3	81.673	737	0	303.19	41918000	0	70	0			173
Q9Y262;B0QY89;B0QY90;C9JHP4;C9K0Q7;H7C3A0	Eukaryotic translation initiation factor 3 subunit L	EIF3L	EIF3L	sp|Q9Y262|EIF3L_HUMAN Eukaryotic translation initiation factor 3 subunit L OS=Homo sapiens OX=9606 GN=EIF3L PE=1 SV=1;tr|B0QY89|B0QY89_HUMAN Eukaryotic translation initiation factor 3 subunit L OS=Homo sapiens OX=9606 GN=EIF3L PE=1 SV=1;tr|B0QY90|B0QY90_HU	Homo sapiens	6	21	21	43.1	66.726	564	0	323.31	40551000	0	70	0			816
C9J9K3;A0A0C4DG17;P08865;F8WD59	40S ribosomal protein SA	RPSA	RPSA	tr|C9J9K3|C9J9K3_HUMAN 40S ribosomal protein SA (Fragment) OS=Homo sapiens OX=9606 GN=RPSA PE=1 SV=8;tr|A0A0C4DG17|A0A0C4DG17_HUMAN 40S ribosomal protein SA OS=Homo sapiens OX=9606 GN=RPSA PE=1 SV=1;sp|P08865|RSSA_HUMAN 40S ribosomal protein SA OS=Homo sap	Homo sapiens	4	10	10	54.8	29.404	263	0	293.44	40331000	0	70	0			46
Q07021;I3L3Q7;I3L3B0	Complement component 1 Q subcomponent-binding protein, mitochondrial	C1QBP	C1QBP	sp|Q07021|C1QBP_HUMAN Complement component 1 Q subcomponent-binding protein, mitochondrial OS=Homo sapiens OX=9606 GN=C1QBP PE=1 SV=1;tr|I3L3Q7|I3L3Q7_HUMAN Complement component 1 Q subcomponent-binding protein, mitochondrial (Fragment) OS=Homo sapiens OX=	Homo sapiens	3	7	7	42.9	31.362	282	0	323.31	37345000	0	70	0			644
P67809;H0Y449;C9J5V9;P16989;Q9Y2T7;A0A0D9SEI8	Nuclease-sensitive element-binding protein 1	YBX1	YBX1	sp|P67809|YBOX1_HUMAN Y-box-binding protein 1 OS=Homo sapiens OX=9606 GN=YBX1 PE=1 SV=3;tr|H0Y449|H0Y449_HUMAN Y-box-binding protein 1 (Fragment) OS=Homo sapiens OX=9606 GN=YBX1 PE=1 SV=1	Homo sapiens	6	13	13	51.2	35.924	324	0	323.31	36692000	0	70	0			624
Q04837;A0A0G2JLD8;E7EUY5;C9K0U8	Single-stranded DNA-binding protein, mitochondrial	SSBP1	SSBP1	sp|Q04837|SSBP_HUMAN Single-stranded DNA-binding protein, mitochondrial OS=Homo sapiens OX=9606 GN=SSBP1 PE=1 SV=1;tr|A0A0G2JLD8|A0A0G2JLD8_HUMAN Single-stranded DNA-binding protein, mitochondrial (Fragment) OS=Homo sapiens OX=9606 GN=SSBP1 PE=1 SV=1;tr|E7	Homo sapiens	4	14	14	75.7	17.259	148	0	323.31	34863000	0	70	0			642
A0A0U1RQF0;P49327;A0A0U1RRG3;J3KTF0	Fatty acid synthase;[Acyl-carrier-protein] S-acetyltransferase;[Acyl-carrier-protein] S-malonyltransferase;3-oxoacyl-[acyl-carrier-protein] synthase;3-oxoacyl-[acyl-carrier-protein] reductase;3-hydroxyacyl-[acyl-carrier-protein] dehydratase;Enoyl-[acyl-carrier-protein] reductase;Oleoyl-[acyl-carrier-protein] hydrolase	FASN	FASN	tr|A0A0U1RQF0|A0A0U1RQF0_HUMAN 3-hydroxyacyl-[acyl-carrier-protein] dehydratase OS=Homo sapiens OX=9606 GN=FASN PE=1 SV=1;sp|P49327|FAS_HUMAN Fatty acid synthase OS=Homo sapiens OX=9606 GN=FASN PE=1 SV=3	Homo sapiens	4	45	45	24.8	273.2	2509	0	323.31	33412000	0	70	0			60
Q60FE5;P21333;A0A087WWY3;F8WE98;H0Y5F3;H0Y5C6;H7C2E7	Filamin-A	FLNA	FLNA	tr|Q60FE5|Q60FE5_HUMAN Filamin-A OS=Homo sapiens OX=9606 GN=FLNA PE=1 SV=1;sp|P21333|FLNA_HUMAN Filamin-A OS=Homo sapiens OX=9606 GN=FLNA PE=1 SV=4;tr|A0A087WWY3|A0A087WWY3_HUMAN Filamin-A OS=Homo sapiens OX=9606 GN=FLNA PE=1 SV=1	Homo sapiens	7	43	43	27.2	278.22	2620	0	323.31	33311000	0	70	0			492
P11021	78 kDa glucose-regulated protein	HSPA5	HSPA5	sp|P11021|BIP_HUMAN Endoplasmic reticulum chaperone BiP OS=Homo sapiens OX=9606 GN=HSPA5 PE=1 SV=2	Homo sapiens	1	22	21	36.9	72.332	654	0	323.31	32658000	0	70	0			454
Q15029;K7EP67;K7EJ74;K7EIV5;K7EIT3	116 kDa U5 small nuclear ribonucleoprotein component	EFTUD2	EFTUD2	sp|Q15029|U5S1_HUMAN 116 kDa U5 small nuclear ribonucleoprotein component OS=Homo sapiens OX=9606 GN=EFTUD2 PE=1 SV=1	Homo sapiens	5	21	20	33.2	109.43	972	0	323.31	30934000	0	70	0			685
Q7Z6Z7;H0Y659;A0A087X1S3;A5YM72	E3 ubiquitin-protein ligase HUWE1	HUWE1	HUWE1	sp|Q7Z6Z7|HUWE1_HUMAN E3 ubiquitin-protein ligase HUWE1 OS=Homo sapiens OX=9606 GN=HUWE1 PE=1 SV=3	Homo sapiens	4	32	31	11.7	481.89	4374	0	323.31	30808000	0	70	0			728
Q99613;B5ME19;H3BPE3;H3BPE4;H3BTY8	Eukaryotic translation initiation factor 3 subunit C;Eukaryotic translation initiation factor 3 subunit C-like protein	EIF3C;EIF3CL	EIF3C	sp|Q99613|EIF3C_HUMAN Eukaryotic translation initiation factor 3 subunit C OS=Homo sapiens OX=9606 GN=EIF3C PE=1 SV=1;sp|B5ME19|EIFCL_HUMAN Eukaryotic translation initiation factor 3 subunit C-like protein OS=Homo sapiens OX=9606 GN=EIF3CL PE=1 SV=1	Homo sapiens	5	17	17	17.2	105.34	913	0	302.13	28636000	0	70	0			154
P14543	Nidogen-1	NID1	NID1	sp|P14543|NID1_HUMAN Nidogen-1 OS=Homo sapiens OX=9606 GN=NID1 PE=1 SV=3	Homo sapiens	1	20	20	20.4	136.38	1247	0	323.31	28312000	0	70	0			472
Q09028;H0YF10;H0YEU5;H0YCT5;H0YDK2;E9PNS2;C9JPP3;E9PIC4;E9PNS6;Q5JP02	Histone-binding protein RBBP4	RBBP4	RBBP4	sp|Q09028|RBBP4_HUMAN Histone-binding protein RBBP4 OS=Homo sapiens OX=9606 GN=RBBP4 PE=1 SV=3	Homo sapiens	10	7	5	21.2	47.655	425	0	178.88	28299000	0	70	0			650
P27348;E9PG15	14-3-3 protein theta	YWHAQ	YWHAQ	sp|P27348|1433T_HUMAN 14-3-3 protein theta OS=Homo sapiens OX=9606 GN=YWHAQ PE=1 SV=1;tr|E9PG15|E9PG15_HUMAN 14-3-3 protein theta (Fragment) OS=Homo sapiens OX=9606 GN=YWHAQ PE=1 SV=1	Homo sapiens	2	11	9	45.7	27.764	245	0	323.31	28257000	0	70	0			512
E9PK01;P29692;A0A087X1X7;E9PRY8;E9PMW7;E9PPR1;E9PL12;E9PQ49;E9PI39;E9PN91;E9PIZ1;E9PL71;H0YCK7;E9PQZ1;E9PKK3;E9PK72;H0YE58;E9PK06;H0YE72;E9PNW6;E9PQC9;E9PJD0	Elongation factor 1-delta	EEF1D	EEF1D	tr|E9PK01|E9PK01_HUMAN Elongation factor 1-delta (Fragment) OS=Homo sapiens OX=9606 GN=EEF1D PE=1 SV=1;sp|P29692|EF1D_HUMAN Elongation factor 1-delta OS=Homo sapiens OX=9606 GN=EEF1D PE=1 SV=5;tr|A0A087X1X7|A0A087X1X7_HUMAN Elongation factor 1-delta OS=Hom	Homo sapiens	22	10	10	49.8	28.821	261	0	323.31	27073000	0	70	0			243
O00303;H0YDT6;E9PQV8;A0A1W2PP79	Eukaryotic translation initiation factor 3 subunit F	EIF3F	EIF3F	sp|O00303|EIF3F_HUMAN Eukaryotic translation initiation factor 3 subunit F OS=Homo sapiens OX=9606 GN=EIF3F PE=1 SV=1	Homo sapiens	4	10	10	36.7	37.563	357	0	246.16	25406000	0	70	0			377
O43847;G3V1R5;F5H7V1;H0Y5G9	Nardilysin	NRD1	NRD1	sp|O43847|NRDC_HUMAN Nardilysin OS=Homo sapiens OX=9606 GN=NRDC PE=1 SV=3;tr|G3V1R5|G3V1R5_HUMAN Nardilysin OS=Homo sapiens OX=9606 GN=NRDC PE=1 SV=1;tr|F5H7V1|F5H7V1_HUMAN Nardilysin OS=Homo sapiens OX=9606 GN=NRDC PE=1 SV=2	Homo sapiens	4	25	25	24.4	131.7	1151	0	323.31	25241000	0	70	0			401
P23396;E9PL09;E9PPU1;F2Z2S8;H0YCJ7;H0YEU2;H0YF32;E9PQ96;E9PJH4;E9PK82;E9PSF4;E9PQX2;H0YES8	40S ribosomal protein S3	RPS3	RPS3	sp|P23396|RS3_HUMAN 40S ribosomal protein S3 OS=Homo sapiens OX=9606 GN=RPS3 PE=1 SV=2;tr|E9PL09|E9PL09_HUMAN 40S ribosomal protein S3 OS=Homo sapiens OX=9606 GN=RPS3 PE=1 SV=1;tr|E9PPU1|E9PPU1_HUMAN 40S ribosomal protein S3 OS=Homo sapiens OX=9606 GN=RPS3	Homo sapiens	13	15	15	55.1	26.688	243	0	201.98	25020000	0	70	0			498
P12270	Nucleoprotein TPR	TPR	TPR	sp|P12270|TPR_HUMAN Nucleoprotein TPR OS=Homo sapiens OX=9606 GN=TPR PE=1 SV=3	Homo sapiens	1	36	36	20.4	267.29	2363	0	323.31	24624000	0	70	0			459
B8ZZQ6;P06454	Prothymosin alpha;Prothymosin alpha, N-terminally processed;Thymosin alpha-1	PTMA	PTMA	tr|B8ZZQ6|B8ZZQ6_HUMAN Prothymosin alpha OS=Homo sapiens OX=9606 GN=PTMA PE=1 SV=1;sp|P06454|PTMA_HUMAN Prothymosin alpha OS=Homo sapiens OX=9606 GN=PTMA PE=1 SV=2	Homo sapiens	2	3	3	17.8	11.758	107	0	55.349	24431000	0	70	0			161
A0A2R8YF43;A0A2R8YD58;E7EU96;P68400;A0A2R8Y5A0;A0A2R8YDP2;A0A2R8YFU2;Q8NEV1;A0A2R8Y4D6;A0A2R8Y4H0;V9GYA2;A0A2R8YEW1;A0A2R8YDY7;A0A2R8Y3W6;A0A2R8Y797;A0A2R8YEL7;V9GY80;A0A2R8YF47;A0A2R8YCK2;A0A2R8Y7T1;A0A087WY74;A0A2R8YCC9	Casein kinase II subunit alpha;Casein kinase II subunit alpha 3	CSNK2A1;CSNK2A3	CSNK2A1	tr|A0A2R8YF43|A0A2R8YF43_HUMAN Casein kinase II subunit alpha OS=Homo sapiens OX=9606 GN=CSNK2A1 PE=1 SV=1;tr|A0A2R8YD58|A0A2R8YD58_HUMAN Casein kinase II subunit alpha OS=Homo sapiens OX=9606 GN=CSNK2A1 PE=1 SV=1;tr|E7EU96|E7EU96_HUMAN Casein kinase II su	Homo sapiens	22	14	14	51.2	41.79	363	0	323.31	23455000	0	70	0			84
P11142;E9PKE3;E9PN89;E9PNE6;A8K7Q2;E9PLF4;P54652;E9PI65;E9PQQ4;E9PQK7;E9PK54;E9PPY6;E9PN25;E9PS65;E9PM13	Heat shock cognate 71 kDa protein	HSPA8	HSPA8	sp|P11142|HSP7C_HUMAN Heat shock cognate 71 kDa protein OS=Homo sapiens OX=9606 GN=HSPA8 PE=1 SV=1;tr|E9PKE3|E9PKE3_HUMAN Heat shock cognate 71 kDa protein OS=Homo sapiens OX=9606 GN=HSPA8 PE=1 SV=1;tr|E9PN89|E9PN89_HUMAN Heat shock cognate 71 kDa protein	Homo sapiens	15	20	16	37.8	70.897	646	0	323.31	23040000	0	70	0			456
O75643;A0A494C1A5	U5 small nuclear ribonucleoprotein 200 kDa helicase	SNRNP200	SNRNP200	sp|O75643|U520_HUMAN U5 small nuclear ribonucleoprotein 200 kDa helicase OS=Homo sapiens OX=9606 GN=SNRNP200 PE=1 SV=2;tr|A0A494C1A5|A0A494C1A5_HUMAN U5 small nuclear ribonucleoprotein 200 kDa helicase (Fragment) OS=Homo sapiens OX=9606 GN=SNRNP200 PE=1 SV	Homo sapiens	2	47	47	26.5	244.5	2136	0	323.31	22203000	0	70	0			412
K7ELL7;P14314;K7EPW7;K7EKX1;K7EJ70	Glucosidase 2 subunit beta	PRKCSH	PRKCSH	tr|K7ELL7|K7ELL7_HUMAN Glucosidase 2 subunit beta OS=Homo sapiens OX=9606 GN=PRKCSH PE=1 SV=1;sp|P14314|GLU2B_HUMAN Glucosidase 2 subunit beta OS=Homo sapiens OX=9606 GN=PRKCSH PE=1 SV=2	Homo sapiens	5	15	13	32.7	60.192	535	0	232.01	22082000	0	70	0			338
P12532;C9JSQ1;F8WCN3;C9J995;C9J8F6;C9JJX8;C9J6W7;C9JT96;P17540	Creatine kinase U-type, mitochondrial	CKMT1A	CKMT1A	sp|P12532|KCRU_HUMAN Creatine kinase U-type, mitochondrial OS=Homo sapiens OX=9606 GN=CKMT1A PE=1 SV=1	Homo sapiens	9	10	10	27.3	47.036	417	0	323.31	20653000	0	70	0			462
Q7L2H7;J3KNJ2;E9PN86;H0YCQ8;E9PRI2;E9PRY0;E7ESM3	Eukaryotic translation initiation factor 3 subunit M	EIF3M	EIF3M	sp|Q7L2H7|EIF3M_HUMAN Eukaryotic translation initiation factor 3 subunit M OS=Homo sapiens OX=9606 GN=EIF3M PE=1 SV=1;tr|J3KNJ2|J3KNJ2_HUMAN Eukaryotic translation initiation factor 3 subunit M (Fragment) OS=Homo sapiens OX=9606 GN=EIF3M PE=1 SV=1	Homo sapiens	7	12	12	44.7	42.502	374	0	323.31	20552000	0	70	0			726
A0A0G2JIW1;P0DMV9;P0DMV8;V9GZ37	Heat shock 70 kDa protein 1B;Heat shock 70 kDa protein 1A	HSPA1B;HSPA1A	HSPA1B	tr|A0A0G2JIW1|A0A0G2JIW1_HUMAN Heat shock 70 kDa protein 1B OS=Homo sapiens OX=9606 GN=HSPA1B PE=1 SV=1;sp|P0DMV9|HS71B_HUMAN Heat shock 70 kDa protein 1B OS=Homo sapiens OX=9606 GN=HSPA1B PE=1 SV=1;sp|P0DMV8|HS71A_HUMAN Heat shock 70 kDa protein 1A OS=Hom	Homo sapiens	4	18	10	39.4	70.108	642	0	323.31	20188000	0	70	0			55
G3V4W0;B4DY08;B2R5W2;G3V4C1;G3V576;G3V2Q1;P07910;G3V5X6;G3V3K6;G3V251;B4DSU6;G3V555;G3V575;G3V4M8;A0A0G2JPF8;A0A0G2JNQ3;P0DMR1;O60812;B7ZW38;B2RXH8;G3V2D6;G3V2H6;G3V5V7	Heterogeneous nuclear ribonucleoproteins C1/C2	HNRNPC	HNRNPC	tr|G3V4W0|G3V4W0_HUMAN Heterogeneous nuclear ribonucleoproteins C1/C2 (Fragment) OS=Homo sapiens OX=9606 GN=HNRNPC PE=1 SV=1;tr|B4DY08|B4DY08_HUMAN Heterogeneous nuclear ribonucleoproteins C1/C2 OS=Homo sapiens OX=9606 GN=HNRNPC PE=1 SV=1;tr|B2R5W2|B2R5W2_	Homo sapiens	23	11	11	40.8	28.916	262	0	254.97	19895000	0	70	0			139
A8MZ84;A0A0G2JNK8;A0A0G2JMI0		LAIR1	LAIR1	tr|A8MZ84|A8MZ84_HUMAN Leukocyte-associated immunoglobulin-like receptor 1 OS=Homo sapiens OX=9606 GN=LAIR1 PE=1 SV=2;tr|A0A0G2JNK8|A0A0G2JNK8_HUMAN Leukocyte-associated immunoglobulin-like receptor 1 OS=Homo sapiens OX=9606 GN=LAIR1 PE=1 SV=1;tr|A0A0G2JMI	Homo sapiens	3	1	1	3.7	29.69	269	1	-2	19735000	0	70	0	+		57
Q13347;Q5TFK1	Eukaryotic translation initiation factor 3 subunit I	EIF3I	EIF3I	sp|Q13347|EIF3I_HUMAN Eukaryotic translation initiation factor 3 subunit I OS=Homo sapiens OX=9606 GN=EIF3I PE=1 SV=1	Homo sapiens	2	15	15	65.2	36.501	325	0	194.52	18808000	0	70	0			666
V9GYY3;A0A384N5Y3;F5H2F4;P11586;V9GZ78;A0A494C1T2	C-1-tetrahydrofolate synthase, cytoplasmic;Methylenetetrahydrofolate dehydrogenase;Methenyltetrahydrofolate cyclohydrolase;Formyltetrahydrofolate synthetase;C-1-tetrahydrofolate synthase, cytoplasmic, N-terminally processed	MTHFD1	MTHFD1	tr|V9GYY3|V9GYY3_HUMAN C-1-tetrahydrofolate synthase, cytoplasmic OS=Homo sapiens OX=9606 GN=MTHFD1 PE=1 SV=2;tr|A0A384N5Y3|A0A384N5Y3_HUMAN C-1-tetrahydrofolate synthase, cytoplasmic OS=Homo sapiens OX=9606 GN=MTHFD1 PE=1 SV=1;tr|F5H2F4|F5H2F4_HUMAN C-1-t	Homo sapiens	6	21	21	28.3	99.719	922	0	323.31	18674000	0	70	0			86
P06748;E5RI98;E5RGW4	Nucleophosmin	NPM1	NPM1	sp|P06748|NPM_HUMAN Nucleophosmin OS=Homo sapiens OX=9606 GN=NPM1 PE=1 SV=2	Homo sapiens	3	8	8	38.1	32.575	294	0	223.89	17481000	0	70	0			436
O15371;B0QYA5;B0QYA4;A0A0D9SGB5;B0QYA6	Eukaryotic translation initiation factor 3 subunit D	EIF3D	EIF3D	sp|O15371|EIF3D_HUMAN Eukaryotic translation initiation factor 3 subunit D OS=Homo sapiens OX=9606 GN=EIF3D PE=1 SV=1	Homo sapiens	5	13	13	33.8	63.972	548	0	235.37	16406000	0	70	0			393
A0A1X7SBZ2;A0A5H1ZRQ2;Q92841;A0A0U1RQJ0	Probable ATP-dependent RNA helicase DDX17	DDX17	DDX17	tr|A0A1X7SBZ2|A0A1X7SBZ2_HUMAN RNA helicase OS=Homo sapiens OX=9606 GN=DDX17 PE=1 SV=1;tr|A0A5H1ZRQ2|A0A5H1ZRQ2_HUMAN RNA helicase OS=Homo sapiens OX=9606 GN=DDX17 PE=1 SV=1;sp|Q92841|DDX17_HUMAN Probable ATP-dependent RNA helicase DDX17 OS=Homo sapiens OX	Homo sapiens	4	12	7	18.8	80.253	729	0	143.13	15790000	0	70	0			70
A0A087WVQ6;Q00610;J3KS13;A0A087WX41;P53675;J3KSQ2;K7EJJ5;J3QL20;F5H5N6	Clathrin heavy chain;Clathrin heavy chain 1	CLTC	CLTC	tr|A0A087WVQ6|A0A087WVQ6_HUMAN Clathrin heavy chain OS=Homo sapiens OX=9606 GN=CLTC PE=1 SV=1;sp|Q00610|CLH1_HUMAN Clathrin heavy chain 1 OS=Homo sapiens OX=9606 GN=CLTC PE=1 SV=5	Homo sapiens	9	28	28	21.5	192.06	1679	0	323.31	15315000	0	70	0			16
O00148;K7EQN7	ATP-dependent RNA helicase DDX39A	DDX39A	DDX39A	sp|O00148|DX39A_HUMAN ATP-dependent RNA helicase DDX39A OS=Homo sapiens OX=9606 GN=DDX39A PE=1 SV=2;tr|K7EQN7|K7EQN7_HUMAN RNA helicase (Fragment) OS=Homo sapiens OX=9606 GN=DDX39A PE=1 SV=1	Homo sapiens	2	7	1	19.7	49.129	427	0	140.19	15303000	0	70	0			370
P17987;E7EQR6;F5H282;E7ERF2;F5H136;F5GZ03;F5H726;F5GZI8;F5H676;F5H7Y1;F5GYL4	T-complex protein 1 subunit alpha	TCP1	TCP1	sp|P17987|TCPA_HUMAN T-complex protein 1 subunit alpha OS=Homo sapiens OX=9606 GN=TCP1 PE=1 SV=1;tr|E7EQR6|E7EQR6_HUMAN T-complex protein 1 subunit alpha OS=Homo sapiens OX=9606 GN=TCP1 PE=1 SV=1;tr|F5H282|F5H282_HUMAN T-complex protein 1 subunit alpha OS=	Homo sapiens	11	18	18	45.1	60.343	556	0	323.31	15302000	0	70	0			482
P22314;Q5JRR6;Q5JRR9;Q5JRS0;Q5JRS1;Q5JRS3;Q5JRS2	Ubiquitin-like modifier-activating enzyme 1	UBA1	UBA1	sp|P22314|UBA1_HUMAN Ubiquitin-like modifier-activating enzyme 1 OS=Homo sapiens OX=9606 GN=UBA1 PE=1 SV=3	Homo sapiens	7	11	11	16.5	117.85	1058	0	323.31	15252000	0	70	0			495
lcl|NC_017825.1_prot_YP_006272967.1_19;lcl|NC_017825.1_prot_YP_006272968.1_20		33K	33K	lcl|NC_017825.1_prot_YP_006272967.1_19 [locus_tag=YOE_gp19] [db_xref=GeneID:12657122] [protein=33K] [protein_id=YP_006272967.1] [location=join(25544..25871,26041..26372)] [gbkey=CDS]	AZ_Chimpanzee adenovirus Y25	2	7	7	29.2	24.662	219	0	183.7	15013000	0	70	0			358
P52597;A0A1B0GW42	Heterogeneous nuclear ribonucleoprotein F;Heterogeneous nuclear ribonucleoprotein F, N-terminally processed	HNRNPF	HNRNPF	sp|P52597|HNRPF_HUMAN Heterogeneous nuclear ribonucleoprotein F OS=Homo sapiens OX=9606 GN=HNRNPF PE=1 SV=3	Homo sapiens	2	6	4	23.4	45.671	415	0	323.31	14757000	0	70	0			573
P12956;B1AHC9	X-ray repair cross-complementing protein 6	XRCC6	XRCC6	sp|P12956|XRCC6_HUMAN X-ray repair cross-complementing protein 6 OS=Homo sapiens OX=9606 GN=XRCC6 PE=1 SV=2;tr|B1AHC9|B1AHC9_HUMAN ATP-dependent DNA helicase 2 subunit 1 OS=Homo sapiens OX=9606 GN=XRCC6 PE=1 SV=1	Homo sapiens	2	15	15	32.5	69.842	609	0	323.31	14708000	0	70	0			464
Q08211	ATP-dependent RNA helicase A	DHX9	DHX9	sp|Q08211|DHX9_HUMAN ATP-dependent RNA helicase A OS=Homo sapiens OX=9606 GN=DHX9 PE=1 SV=4	Homo sapiens	1	21	21	21.3	140.96	1270	0	323.31	14677000	0	70	0			645
P61163;R4GMT0;A0A1B0GVS3	Alpha-centractin	ACTR1A	ACTR1A	sp|P61163|ACTZ_HUMAN Alpha-centractin OS=Homo sapiens OX=9606 GN=ACTR1A PE=1 SV=1;tr|R4GMT0|R4GMT0_HUMAN Alpha-centractin OS=Homo sapiens OX=9606 GN=ACTR1A PE=1 SV=1	Homo sapiens	3	10	7	40.7	42.613	376	0	315.31	13681000	0	70	0			597
O75821;K7ER90;K7EL20;K7ENA8;K7EP16;K7EL60	Eukaryotic translation initiation factor 3 subunit G	EIF3G	EIF3G	sp|O75821|EIF3G_HUMAN Eukaryotic translation initiation factor 3 subunit G OS=Homo sapiens OX=9606 GN=EIF3G PE=1 SV=2;tr|K7ER90|K7ER90_HUMAN Eukaryotic translation initiation factor 3 subunit G (Fragment) OS=Homo sapiens OX=9606 GN=EIF3G PE=1 SV=1;tr|K7EL2	Homo sapiens	6	10	10	41.9	35.611	320	0	221.37	13680000	0	70	0			413
A0A1W2PP35;A0A1X7SBS1;A0A1W2PPS1;Q00839;A0A1W2PRZ7;A0A1W2PQ74;A0A1W2PQL0;A0A1W2PP34;A0A1W2PPL4;A0A1W2PPH7;Q5RI18;A0A1W2PQD4;A0A1W2PPE9;A0A1W2PP22	Heterogeneous nuclear ribonucleoprotein U	HNRNPU	HNRNPU	tr|A0A1W2PP35|A0A1W2PP35_HUMAN Heterogeneous nuclear ribonucleoprotein U (Fragment) OS=Homo sapiens OX=9606 GN=HNRNPU PE=1 SV=1;tr|A0A1X7SBS1|A0A1X7SBS1_HUMAN Heterogeneous nuclear ribonucleoprotein U OS=Homo sapiens OX=9606 GN=HNRNPU PE=1 SV=1;tr|A0A1W2PP	Homo sapiens	14	7	7	12.2	80.648	728	0	202.73	13215000	0	70	0			68
B3KS98;O15372;A0A087WZK9;E5RJT0;E5RGU4;E5RFW7;E5RFH0	Eukaryotic translation initiation factor 3 subunit H	EIF3H	EIF3H	tr|B3KS98|B3KS98_HUMAN Eukaryotic translation initiation factor 3 subunit H OS=Homo sapiens OX=9606 GN=EIF3H PE=1 SV=1;sp|O15372|EIF3H_HUMAN Eukaryotic translation initiation factor 3 subunit H OS=Homo sapiens OX=9606 GN=EIF3H PE=1 SV=1;tr|A0A087WZK9|A0A08	Homo sapiens	7	12	12	40.2	41.581	366	0	233.26	12878000	0	70	0			143
P25205;J3KQ69;A0A499FHX9;Q7Z6P5	DNA replication licensing factor MCM3	MCM3	MCM3	sp|P25205|MCM3_HUMAN DNA replication licensing factor MCM3 OS=Homo sapiens OX=9606 GN=MCM3 PE=1 SV=3;tr|J3KQ69|J3KQ69_HUMAN DNA helicase OS=Homo sapiens OX=9606 GN=MCM3 PE=1 SV=3;tr|A0A499FHX9|A0A499FHX9_HUMAN DNA helicase OS=Homo sapiens OX=9606 GN=MCM3 P	Homo sapiens	4	15	15	26.7	90.98	808	0	164.45	12856000	0	70	0			501
P19338;H7BY16	Nucleolin	NCL	NCL	sp|P19338|NUCL_HUMAN Nucleolin OS=Homo sapiens OX=9606 GN=NCL PE=1 SV=3;tr|H7BY16|H7BY16_HUMAN Nucleolin (Fragment) OS=Homo sapiens OX=9606 GN=NCL PE=1 SV=8	Homo sapiens	2	15	15	24.4	76.613	710	0	270.56	12846000	0	70	0			483
Q9NQX3;F5H039;G3V582;H0YJ30;H0YJR5	Gephyrin;Molybdopterin adenylyltransferase;Molybdopterin molybdenumtransferase	GPHN	GPHN	sp|Q9NQX3|GEPH_HUMAN Gephyrin OS=Homo sapiens OX=9606 GN=GPHN PE=1 SV=1;tr|F5H039|F5H039_HUMAN Molybdopterin molybdenumtransferase OS=Homo sapiens OX=9606 GN=GPHN PE=1 SV=1	Homo sapiens	5	17	17	39.5	79.748	736	0	260.16	12766000	0	70	0			791
Q15084	Protein disulfide-isomerase A6	PDIA6	PDIA6	sp|Q15084|PDIA6_HUMAN Protein disulfide-isomerase A6 OS=Homo sapiens OX=9606 GN=PDIA6 PE=1 SV=1	Homo sapiens	1	12	12	35.7	48.121	440	0	323.31	12722000	0	70	0			686
P05387;H0YDD8	60S acidic ribosomal protein P2	RPLP2	RPLP2	sp|P05387|RLA2_HUMAN 60S acidic ribosomal protein P2 OS=Homo sapiens OX=9606 GN=RPLP2 PE=1 SV=1	Homo sapiens	2	9	8	79.1	11.665	115	0	204.9	12497000	0	70	0			434
F8VY35;F8W0J6;F5H4R6;P55209;F8W020;F8VUX1;H0YIV4;H0YHC3;F8W118;F8VXI6;F8VV59;B7Z9C2;H0YH88;F8VVB5;F8VRJ2;B7Z4K9	Nucleosome assembly protein 1-like 1	NAP1L1	NAP1L1	tr|F8VY35|F8VY35_HUMAN Nucleosome assembly protein 1-like 1 (Fragment) OS=Homo sapiens OX=9606 GN=NAP1L1 PE=1 SV=1;tr|F8W0J6|F8W0J6_HUMAN Nucleosome assembly protein 1-like 1 OS=Homo sapiens OX=9606 GN=NAP1L1 PE=1 SV=1;tr|F5H4R6|F5H4R6_HUMAN Nucleosome ass	Homo sapiens	16	9	3	56.4	31.02	264	0	115.98	12417000	0	70	0			256
P50990;H7C4C8;H7C2U0	T-complex protein 1 subunit theta	CCT8	CCT8	sp|P50990|TCPQ_HUMAN T-complex protein 1 subunit theta OS=Homo sapiens OX=9606 GN=CCT8 PE=1 SV=4;tr|H7C4C8|H7C4C8_HUMAN T-complex protein 1 subunit theta (Fragment) OS=Homo sapiens OX=9606 GN=CCT8 PE=1 SV=1	Homo sapiens	3	15	15	32.7	59.62	548	0	272.28	12384000	0	70	0			567
F8W914;H7C106;A0A0U1RQR6	Reticulon	RTN4	RTN4	tr|F8W914|F8W914_HUMAN Reticulon OS=Homo sapiens OX=9606 GN=RTN4 PE=1 SV=1;tr|H7C106|H7C106_HUMAN Reticulon (Fragment) OS=Homo sapiens OX=9606 GN=RTN4 PE=1 SV=1	Homo sapiens	3	7	1	32.2	37.144	345	0	151.03	11838000	0	70	0			268
Q9BQA1;H0Y711	Methylosome protein 50	WDR77	WDR77	sp|Q9BQA1|MEP50_HUMAN Methylosome protein 50 OS=Homo sapiens OX=9606 GN=WDR77 PE=1 SV=1;tr|H0Y711|H0Y711_HUMAN Methylosome protein 50 (Fragment) OS=Homo sapiens OX=9606 GN=WDR77 PE=1 SV=1	Homo sapiens	2	10	10	38.3	36.724	342	0	302.57	11791000	0	70	0			771
O00231;J3QRY4;J3KSW3	26S proteasome non-ATPase regulatory subunit 11	PSMD11	PSMD11	sp|O00231|PSD11_HUMAN 26S proteasome non-ATPase regulatory subunit 11 OS=Homo sapiens OX=9606 GN=PSMD11 PE=1 SV=3;tr|J3QRY4|J3QRY4_HUMAN 26S proteasome non-ATPase regulatory subunit 11 (Fragment) OS=Homo sapiens OX=9606 GN=PSMD11 PE=1 SV=8	Homo sapiens	3	10	10	27.5	47.463	422	0	167.63	11732000	0	70	0			373
P49368;B4DUR8;E9PRC8;Q5SZX6;E9PQ35;E9PM09;Q5SZW8;Q5SZX9	T-complex protein 1 subunit gamma	CCT3	CCT3	sp|P49368|TCPG_HUMAN T-complex protein 1 subunit gamma OS=Homo sapiens OX=9606 GN=CCT3 PE=1 SV=4;tr|B4DUR8|B4DUR8_HUMAN T-complex protein 1 subunit gamma OS=Homo sapiens OX=9606 GN=CCT3 PE=1 SV=1	Homo sapiens	8	11	11	30.8	60.533	545	0	181.66	11467000	0	70	0			560
P63244;D6RAC2;D6RHH4;J3KPE3;D6RFX4;H0YAF8;D6R9Z1;D6R9L0;D6REE5;D6RF23;D6RAU2;E9PD14;D6RFZ9;H0YAM7;H0Y8W2;D6RGK8;D6RHJ5;D6R909;H0Y8R5;D6RBD0;H0Y9P0	Guanine nucleotide-binding protein subunit beta-2-like 1;Guanine nucleotide-binding protein subunit beta-2-like 1, N-terminally processed	GNB2L1	GNB2L1	sp|P63244|RACK1_HUMAN Receptor of activated protein C kinase 1 OS=Homo sapiens OX=9606 GN=RACK1 PE=1 SV=3;tr|D6RAC2|D6RAC2_HUMAN Receptor of-activated protein C kinase 1 OS=Homo sapiens OX=9606 GN=RACK1 PE=1 SV=1;tr|D6RHH4|D6RHH4_HUMAN Receptor of-activate	Homo sapiens	21	7	7	33.1	35.076	317	0	234.53	11423000	0	70	0			622
A0A087WUZ3;Q01082;F8W6C1;O15020;A4QPE4	Spectrin beta chain, non-erythrocytic 1	SPTBN1	SPTBN1	tr|A0A087WUZ3|A0A087WUZ3_HUMAN Spectrin beta chain OS=Homo sapiens OX=9606 GN=SPTBN1 PE=1 SV=1;sp|Q01082|SPTB2_HUMAN Spectrin beta chain, non-erythrocytic 1 OS=Homo sapiens OX=9606 GN=SPTBN1 PE=1 SV=2	Homo sapiens	5	25	25	14.6	274.83	2366	0	323.31	11214000	0	70	0			15
K7EMV3;A0A590UJJ6;B4DEB1;K7EK07;K7ES00;Q71DI3;Q16695;P84243;P68431;K7EP01;Q6NXT2	Histone H3;Histone H3.2;Histone H3.1t;Histone H3.3;Histone H3.1;Histone H3.3C	H3F3B;H3F3A;HIST2H3A;HIST3H3;HIST1H3A;H3F3C	H3F3B	tr|K7EMV3|K7EMV3_HUMAN Histone H3 OS=Homo sapiens OX=9606 GN=H3-3B PE=1 SV=1;tr|A0A590UJJ6|A0A590UJJ6_HUMAN Histone H3 OS=Homo sapiens OX=9606 GN=H3-3A PE=1 SV=1;tr|B4DEB1|B4DEB1_HUMAN Histone H3 OS=Homo sapiens OX=9606 GN=H3-3A PE=1 SV=1;tr|K7EK07|K7EK07_	Homo sapiens	11	6	2	29.3	10.334	92	0	36.481	10527000	0	70	0			104
P10909;H0YC35;E7ERK6;H0YLK8;H0YAS8;E7ETB4;E5RG36;E5RGB0;E5RH61;E5RJZ5	Clusterin;Clusterin beta chain;Clusterin alpha chain;Clusterin	CLU	CLU	sp|P10909|CLUS_HUMAN Clusterin OS=Homo sapiens OX=9606 GN=CLU PE=1 SV=1;tr|H0YC35|H0YC35_HUMAN Clusterin (Fragment) OS=Homo sapiens OX=9606 GN=CLU PE=1 SV=1;tr|E7ERK6|E7ERK6_HUMAN Clusterin (Fragment) OS=Homo sapiens OX=9606 GN=CLU PE=1 SV=1;tr|H0YLK8|H0YL	Homo sapiens	10	10	10	23.8	52.494	449	0	225.04	10459000	0	70	0			453
O60763	General vesicular transport factor p115	USO1	USO1	sp|O60763|USO1_HUMAN General vesicular transport factor p115 OS=Homo sapiens OX=9606 GN=USO1 PE=1 SV=2	Homo sapiens	1	16	16	19.9	107.89	962	0	323.31	10265000	0	70	0			404
Q9UQ80;F8VR77;H0YIN7;F8W0A3;F8VZ69	Proliferation-associated protein 2G4	PA2G4	PA2G4	sp|Q9UQ80|PA2G4_HUMAN Proliferation-associated protein 2G4 OS=Homo sapiens OX=9606 GN=PA2G4 PE=1 SV=3;tr|F8VR77|F8VR77_HUMAN Proliferation-associated protein 2G4 OS=Homo sapiens OX=9606 GN=PA2G4 PE=1 SV=1	Homo sapiens	5	9	9	25.4	43.786	394	0	173.81	10167000	0	70	0			813
P78371;F5GWF6;F8VQ14	T-complex protein 1 subunit beta	CCT2	CCT2	sp|P78371|TCPB_HUMAN T-complex protein 1 subunit beta OS=Homo sapiens OX=9606 GN=CCT2 PE=1 SV=4;tr|F5GWF6|F5GWF6_HUMAN CCT-beta OS=Homo sapiens OX=9606 GN=CCT2 PE=1 SV=2;tr|F8VQ14|F8VQ14_HUMAN CCT-beta OS=Homo sapiens OX=9606 GN=CCT2 PE=1 SV=1	Homo sapiens	3	11	11	31.2	57.488	535	0	323.31	9954200	0	70	0			632
P40227	T-complex protein 1 subunit zeta	CCT6A	CCT6A	sp|P40227|TCPZ_HUMAN T-complex protein 1 subunit zeta OS=Homo sapiens OX=9606 GN=CCT6A PE=1 SV=3	Homo sapiens	1	9	9	22	58.024	531	0	152.2	9632100	0	70	0			543
Q8N163;G3V119;H0YB24;E5RHJ4;E5RGU7;E5RFJ3;A0A087X2B6;H0YC69;H0YC58;E5RHH8	Cell cycle and apoptosis regulator protein 2	CCAR2	CCAR2	sp|Q8N163|CCAR2_HUMAN Cell cycle and apoptosis regulator protein 2 OS=Homo sapiens OX=9606 GN=CCAR2 PE=1 SV=2;tr|G3V119|G3V119_HUMAN Cell cycle and apoptosis regulator protein 2 OS=Homo sapiens OX=9606 GN=CCAR2 PE=1 SV=1;tr|H0YB24|H0YB24_HUMAN Cell cycle a	Homo sapiens	10	14	14	28	102.9	923	0	199.66	9611600	0	70	0			737
A0A286YF22;O43175;A0A2C9F2M7;A0A286YFA2;A0A286YFL2;A0A286YFM8;A0A286YER3;A0A286YFC8;A0A286YFB2;A0A286YF34;A0A286YF78;A0A286YFF3;A0A286YFE1;A0A286YFK5	D-3-phosphoglycerate dehydrogenase	PHGDH	PHGDH	tr|A0A286YF22|A0A286YF22_HUMAN D-3-phosphoglycerate dehydrogenase OS=Homo sapiens OX=9606 GN=PHGDH PE=1 SV=1;sp|O43175|SERA_HUMAN D-3-phosphoglycerate dehydrogenase OS=Homo sapiens OX=9606 GN=PHGDH PE=1 SV=4;tr|A0A2C9F2M7|A0A2C9F2M7_HUMAN D-3-phosphoglycer	Homo sapiens	14	11	11	30	55.938	526	0	115.03	9582600	0	70	0			73
P10155;G5E9R9;H0Y9N5;D6RDN1;D6RE09	60 kDa SS-A/Ro ribonucleoprotein	TROVE2	TROVE2	sp|P10155|RO60_HUMAN 60 kDa SS-A/Ro ribonucleoprotein OS=Homo sapiens OX=9606 GN=RO60 PE=1 SV=2	Homo sapiens	5	15	15	35.5	60.67	538	0	323.31	9533900	0	70	0			450
Q7KZ85	Transcription elongation factor SPT6	SUPT6H	SUPT6H	sp|Q7KZ85|SPT6H_HUMAN Transcription elongation factor SPT6 OS=Homo sapiens OX=9606 GN=SUPT6H PE=1 SV=2	Homo sapiens	1	21	21	17.8	199.07	1726	0	323.31	9431900	0	70	0			724
A0A1B0GUA3;Q96EK5;A0A6Q8PHL8;A0A6Q8PH45;A0A1B0GUH6;A0A6Q8PGG2;A0A0D9SFK7;A0A6Q8PH08;A0A1B0GTE6;A0A1B0GW21;A0A1B0GTX3;A0A1B0GU96;A0A6Q8PHE6;A0A1B0GTE2;A0A1B0GVY9	KIF1-binding protein	KIAA1279;KIF1BP	KIAA1279	tr|A0A1B0GUA3|A0A1B0GUA3_HUMAN KIF-binding protein OS=Homo sapiens OX=9606 GN=KIFBP PE=1 SV=1;sp|Q96EK5|KBP_HUMAN KIF-binding protein OS=Homo sapiens OX=9606 GN=KIFBP PE=1 SV=1;tr|A0A6Q8PHL8|A0A6Q8PHL8_HUMAN KIF-binding protein OS=Homo sapiens OX=9606 GN=K	Homo sapiens	15	12	12	28.5	74.783	646	0	237.69	9148800	0	70	0			63
B5MDF5;P62826;J3KQE5;F5H018;H0YFC6;B4DV51;A0A087X0W0	GTP-binding nuclear protein Ran	RAN	RAN	tr|B5MDF5|B5MDF5_HUMAN GTP-binding nuclear protein Ran OS=Homo sapiens OX=9606 GN=RAN PE=1 SV=1;sp|P62826|RAN_HUMAN GTP-binding nuclear protein Ran OS=Homo sapiens OX=9606 GN=RAN PE=1 SV=3;tr|J3KQE5|J3KQE5_HUMAN GTP-binding nuclear protein Ran (Fragment) O	Homo sapiens	7	6	6	30.9	26.224	233	0	49.761	8941600	0	70	0			153
Q9BVA1	Tubulin beta-2B chain	TUBB2B	TUBB2B	sp|Q9BVA1|TBB2B_HUMAN Tubulin beta-2B chain OS=Homo sapiens OX=9606 GN=TUBB2B PE=1 SV=1	Homo sapiens	1	23	1	63.4	49.953	445	0	125.97	8870500	0	70	0			776
Q14974;J3QR48;J3KTM9;J3QRG4;J3QKQ5	Importin subunit beta-1	KPNB1	KPNB1	sp|Q14974|IMB1_HUMAN Importin subunit beta-1 OS=Homo sapiens OX=9606 GN=KPNB1 PE=1 SV=2	Homo sapiens	5	9	9	12	97.169	876	0	323.31	8846200	0	70	0			682
lcl|NC_017825.1_prot_YP_006272955.1_7		pTP	pTP	lcl|NC_017825.1_prot_YP_006272955.1_7 [locus_tag=YOE_gp07] [db_xref=GeneID:12657141] [protein=pTP] [protein_id=YP_006272955.1] [location=complement(join(8461..10392,13838..13846))] [gbkey=CDS]	AZ_Chimpanzee adenovirus Y25	1	16	16	25.2	74.389	646	0	208.86	8741300	0	70	0			347
A0A087WZZ9;A0A024QZP7;P06493;E5RIU6;K7ELV5;E7ESI2;G3V5T9;P24941;Q00526;G3V317;F8VXD2;A0A2R8YEB7;F8VYH9;F8VZZ0;F8VTV8;F8VWX7;F8VZ51;K7EJ83;A0A2R8Y644;H0YAZ9;Q9BVE2;E7EUK8;E5RGN0;A0A087X209;A0A087WZU2;A0A2R8YD28;F5H6Z0;A0A2R8YF61;A0A2R8Y7W5;J3QSD7;A0A2R8Y4Z0;Q00535;P11802;Q00534;P50750;Q96Q40;O94921;Q07002;Q00536;Q00537;Q9NYV4;Q14004	Cyclin-dependent kinase 1	CDK1;CDC2	CDK1	tr|A0A087WZZ9|A0A087WZZ9_HUMAN Cyclin-dependent kinase 1 OS=Homo sapiens OX=9606 GN=CDK1 PE=1 SV=1;tr|A0A024QZP7|A0A024QZP7_HUMAN Cell division cycle 2, G1 to S and G2 to M, isoform CRA_a OS=Homo sapiens OX=9606 GN=CDK1 PE=1 SV=1;sp|P06493|CDK1_HUMAN Cycli	Homo sapiens	42	6	6	33.9	25.836	224	0	71.882	8665800	0	70	0			0
F5H6X6;Q14697;E9PKU7;E9PNH1	Neutral alpha-glucosidase AB	GANAB	GANAB	tr|F5H6X6|F5H6X6_HUMAN Neutral alpha-glucosidase AB OS=Homo sapiens OX=9606 GN=GANAB PE=1 SV=1;sp|Q14697|GANAB_HUMAN Neutral alpha-glucosidase AB OS=Homo sapiens OX=9606 GN=GANAB PE=1 SV=3;tr|E9PKU7|E9PKU7_HUMAN Neutral alpha-glucosidase AB OS=Homo sapiens	Homo sapiens	4	8	8	13.7	96.215	847	0	84.579	8646900	0	70	0			258
P61978;Q5T6W2;S4R359	Heterogeneous nuclear ribonucleoprotein K	HNRNPK	HNRNPK	sp|P61978|HNRPK_HUMAN Heterogeneous nuclear ribonucleoprotein K OS=Homo sapiens OX=9606 GN=HNRNPK PE=1 SV=1;tr|Q5T6W2|Q5T6W2_HUMAN Heterogeneous nuclear ribonucleoprotein K (Fragment) OS=Homo sapiens OX=9606 GN=HNRNPK PE=1 SV=1	Homo sapiens	3	11	11	30.7	50.976	463	0	309.87	8468400	0	70	0			600
O00267;M0R105;M0R2M5	Transcription elongation factor SPT5	SUPT5H	SUPT5H	sp|O00267|SPT5H_HUMAN Transcription elongation factor SPT5 OS=Homo sapiens OX=9606 GN=SUPT5H PE=1 SV=1	Homo sapiens	3	13	13	17.7	121	1087	0	184.81	8410100	0	70	0			375
E9PKG1;Q99873;E9PIX6;E9PQ98;E9PNR9;H0YDE4;Q9NR22;E9PMW9	Protein arginine N-methyltransferase 1	PRMT1	PRMT1	tr|E9PKG1|E9PKG1_HUMAN Protein arginine N-methyltransferase 1 OS=Homo sapiens OX=9606 GN=PRMT1 PE=1 SV=1;sp|Q99873|ANM1_HUMAN Protein arginine N-methyltransferase 1 OS=Homo sapiens OX=9606 GN=PRMT1 PE=1 SV=3;tr|E9PIX6|E9PIX6_HUMAN Protein arginine N-methyl	Homo sapiens	8	11	11	33.2	37.709	325	0	157.9	8390600	0	70	0			244
O43242	26S proteasome non-ATPase regulatory subunit 3	PSMD3	PSMD3	sp|O43242|PSMD3_HUMAN 26S proteasome non-ATPase regulatory subunit 3 OS=Homo sapiens OX=9606 GN=PSMD3 PE=1 SV=2	Homo sapiens	1	11	11	23.4	60.977	534	0	230.02	8087200	0	70	0			396
Q15008;C9J0E9;H7C531;C9J7B7	26S proteasome non-ATPase regulatory subunit 6	PSMD6	PSMD6	sp|Q15008|PSMD6_HUMAN 26S proteasome non-ATPase regulatory subunit 6 OS=Homo sapiens OX=9606 GN=PSMD6 PE=1 SV=1	Homo sapiens	4	13	13	41.9	45.531	389	0	226.86	8045700	0	70	0			683
Q5SRQ6;P67870;Q5SRQ3;N0E472;A0A0G2JM12;N0E644;A0A0G2JM58	Casein kinase II subunit beta	CSNK2B;CSNK2B-LY6G5B-1181;CSNK2B-LY6G5B--991	CSNK2B	tr|Q5SRQ6|Q5SRQ6_HUMAN Casein kinase II subunit beta OS=Homo sapiens OX=9606 GN=CSNK2B PE=1 SV=2;sp|P67870|CSK2B_HUMAN Casein kinase II subunit beta OS=Homo sapiens OX=9606 GN=CSNK2B PE=1 SV=1;tr|Q5SRQ3|Q5SRQ3_HUMAN Casein kinase II subunit beta OS=Homo sa	Homo sapiens	7	6	6	35	26.925	234	0	49.365	8013800	0	70	0			625
A0A087WWU8;D6R904;A0A494C0G0;H0YL80;H0YKX5;H0YKP3;A0A0S2Z4G6;Q6ZN40;P09493;Q5VU61		TPM3	TPM3	tr|A0A087WWU8|A0A087WWU8_HUMAN Tropomyosin alpha-3 chain OS=Homo sapiens OX=9606 GN=TPM3 PE=1 SV=1;tr|D6R904|D6R904_HUMAN Tropomyosin alpha-3 chain OS=Homo sapiens OX=9606 GN=TPM3 PE=1 SV=1;tr|A0A494C0G0|A0A494C0G0_HUMAN Tropomyosin alpha-3 chain (Fragment	Homo sapiens	10	15	5	48.9	26.42	227	0	146.39	7705600	0	70	0			21
P13010;C9JZ81;H7C0H9	X-ray repair cross-complementing protein 5	XRCC5	XRCC5	sp|P13010|XRCC5_HUMAN X-ray repair cross-complementing protein 5 OS=Homo sapiens OX=9606 GN=XRCC5 PE=1 SV=3	Homo sapiens	3	12	12	21.7	82.704	732	0	169.75	7618300	0	70	0			465
P26640;A0A140T936;A0A140T954;A2ABF4;A0A0G2JJT9;A0A140T904;H0Y426	Valine--tRNA ligase	VARS	VARS	sp|P26640|SYVC_HUMAN Valine--tRNA ligase OS=Homo sapiens OX=9606 GN=VARS1 PE=1 SV=4;tr|A0A140T936|A0A140T936_HUMAN Valyl-tRNA synthetase (Fragment) OS=Homo sapiens OX=9606 GN=VARS1 PE=1 SV=1	Homo sapiens	7	17	17	18.4	140.47	1264	0	235.67	7556000	0	70	0			510
Q9Y5B9;G3V5A4;G3V401;G3V2X0	FACT complex subunit SPT16	SUPT16H	SUPT16H	sp|Q9Y5B9|SP16H_HUMAN FACT complex subunit SPT16 OS=Homo sapiens OX=9606 GN=SUPT16H PE=1 SV=1	Homo sapiens	4	12	12	16.2	119.91	1047	0	200.62	7548400	0	70	0			824
Q71U36;P0DPH8;P0DPH7;F8VQQ4;Q6PEY2	Tubulin alpha-1A chain;Tubulin alpha-3E chain	TUBA1A;TUBA3E	TUBA1A	sp|Q71U36|TBA1A_HUMAN Tubulin alpha-1A chain OS=Homo sapiens OX=9606 GN=TUBA1A PE=1 SV=1;sp|P0DPH8|TBA3D_HUMAN Tubulin alpha-3D chain OS=Homo sapiens OX=9606 GN=TUBA3D PE=1 SV=1;sp|P0DPH7|TBA3C_HUMAN Tubulin alpha-3C chain OS=Homo sapiens OX=9606 GN=TUBA3C	Homo sapiens	5	24	1	70.3	50.135	451	0	69.385	7159900	0	70	0			723
O14818;H0Y586;Q8TAA3;A0A087WYS6;F5GY34	Proteasome subunit alpha type-7	PSMA7	PSMA7	sp|O14818|PSA7_HUMAN Proteasome subunit alpha type-7 OS=Homo sapiens OX=9606 GN=PSMA7 PE=1 SV=1	Homo sapiens	5	7	7	35.5	27.887	248	0	323.31	7035400	0	70	0			385
E9PM69;P17980;R4GNH3;E9PKD5;E9PMD8;E9PN50;E9PLG2	26S protease regulatory subunit 6A	PSMC3	PSMC3	tr|E9PM69|E9PM69_HUMAN 26S proteasome regulatory subunit 6A OS=Homo sapiens OX=9606 GN=PSMC3 PE=1 SV=1;sp|P17980|PRS6A_HUMAN 26S proteasome regulatory subunit 6A OS=Homo sapiens OX=9606 GN=PSMC3 PE=1 SV=3;tr|R4GNH3|R4GNH3_HUMAN 26S proteasome regulatory su	Homo sapiens	7	10	10	30.5	44.323	397	0	171.88	6999100	0	70	0			248
P50991	T-complex protein 1 subunit delta	CCT4	CCT4	sp|P50991|TCPD_HUMAN T-complex protein 1 subunit delta OS=Homo sapiens OX=9606 GN=CCT4 PE=1 SV=4	Homo sapiens	1	8	8	20.6	57.924	539	0	106.97	6983800	0	70	0			568
P33993;C9J8M6	DNA replication licensing factor MCM7	MCM7	MCM7	sp|P33993|MCM7_HUMAN DNA replication licensing factor MCM7 OS=Homo sapiens OX=9606 GN=MCM7 PE=1 SV=4	Homo sapiens	2	12	12	19.1	81.307	719	0	179.48	6977900	0	70	0			534
P04181	Ornithine aminotransferase, mitochondrial;Ornithine aminotransferase, hepatic form;Ornithine aminotransferase, renal form	OAT	OAT	sp|P04181|OAT_HUMAN Ornithine aminotransferase, mitochondrial OS=Homo sapiens OX=9606 GN=OAT PE=1 SV=1	Homo sapiens	1	8	8	25.3	48.534	439	0	247.21	6643500	0	70	0			426
P53621;A0A3B3ISC6;A0A3B3IT15;A0A3B3IS84;A0A3B3IU89;A0A3B3ITI7;A0A3B3ITV3;A0A3B3ISK1;A0A3B3IU78	Coatomer subunit alpha;Xenin;Proxenin	COPA	COPA	sp|P53621|COPA_HUMAN Coatomer subunit alpha OS=Homo sapiens OX=9606 GN=COPA PE=1 SV=2;tr|A0A3B3ISC6|A0A3B3ISC6_HUMAN Coatomer subunit alpha (Fragment) OS=Homo sapiens OX=9606 GN=COPA PE=1 SV=1;tr|A0A3B3IT15|A0A3B3IT15_HUMAN Coatomer subunit alpha OS=Homo s	Homo sapiens	9	13	13	13.6	138.34	1224	0	323.31	6608700	0	70	0			578
P46060;H0Y4Q3;B0QYT6;B0QYT5;B0QYT4	Ran GTPase-activating protein 1	RANGAP1	RANGAP1	sp|P46060|RAGP1_HUMAN Ran GTPase-activating protein 1 OS=Homo sapiens OX=9606 GN=RANGAP1 PE=1 SV=1	Homo sapiens	5	15	15	32.7	63.541	587	0	323.31	6432100	0	70	0			552
P52292;J3QLL0;J3KS65	Importin subunit alpha-1	KPNA2	KPNA2	sp|P52292|IMA1_HUMAN Importin subunit alpha-1 OS=Homo sapiens OX=9606 GN=KPNA2 PE=1 SV=1;tr|J3QLL0|J3QLL0_HUMAN Importin subunit alpha-1 (Fragment) OS=Homo sapiens OX=9606 GN=KPNA2 PE=1 SV=1;tr|J3KS65|J3KS65_HUMAN Importin subunit alpha-1 (Fragment) OS=Hom	Homo sapiens	3	8	8	20.8	57.861	529	0	91.163	6158700	0	70	0			572
Q13263;M0R0K9;M0R2I3;M0R3C0	Transcription intermediary factor 1-beta	TRIM28	TRIM28	sp|Q13263|TIF1B_HUMAN Transcription intermediary factor 1-beta OS=Homo sapiens OX=9606 GN=TRIM28 PE=1 SV=5;tr|M0R0K9|M0R0K9_HUMAN Transcription intermediary factor 1-beta (Fragment) OS=Homo sapiens OX=9606 GN=TRIM28 PE=1 SV=1	Homo sapiens	4	13	13	25.4	88.549	835	0	187.15	6152600	0	70	0			664
E9PJF4;P54105;E9PMI6;J3KN38	Methylosome subunit pICln	CLNS1A	CLNS1A	tr|E9PJF4|E9PJF4_HUMAN Chloride channel, nucleotide sensitive 1A OS=Homo sapiens OX=9606 GN=CLNS1A PE=1 SV=1;sp|P54105|ICLN_HUMAN Methylosome subunit pICln OS=Homo sapiens OX=9606 GN=CLNS1A PE=1 SV=1;tr|E9PMI6|E9PMI6_HUMAN Chloride channel, nucleotide sens	Homo sapiens	4	2	2	22.9	19.743	179	0	77.087	6116200	0	70	0			242
P20700;E9PBF6;A0A0D9SFE5;A0A0D9SFY5	Lamin-B1	LMNB1	LMNB1	sp|P20700|LMNB1_HUMAN Lamin-B1 OS=Homo sapiens OX=9606 GN=LMNB1 PE=1 SV=2;tr|E9PBF6|E9PBF6_HUMAN Lamin-B1 OS=Homo sapiens OX=9606 GN=LMNB1 PE=1 SV=1;tr|A0A0D9SFE5|A0A0D9SFE5_HUMAN Lamin B1, isoform CRA_a OS=Homo sapiens OX=9606 GN=LMNB1 PE=1 SV=1	Homo sapiens	4	13	13	29.4	66.408	586	0	294.9	6010100	0	70	0			491
Q86VP6;A0A0C4DGH5;H0YH27	Cullin-associated NEDD8-dissociated protein 1	CAND1	CAND1	sp|Q86VP6|CAND1_HUMAN Cullin-associated NEDD8-dissociated protein 1 OS=Homo sapiens OX=9606 GN=CAND1 PE=1 SV=2;tr|A0A0C4DGH5|A0A0C4DGH5_HUMAN Cullin-associated NEDD8-dissociated protein 1 (Fragment) OS=Homo sapiens OX=9606 GN=CAND1 PE=1 SV=1	Homo sapiens	3	12	12	12.7	136.37	1230	0	322.16	5957400	0	70	0			732
G5E9H3;Q49AM3	Tetratricopeptide repeat protein 31	TTC31	TTC31	tr|G5E9H3|G5E9H3_HUMAN Tetratricopeptide repeat protein 31 OS=Homo sapiens OX=9606 GN=TTC31 PE=1 SV=1;sp|Q49AM3|TTC31_HUMAN Tetratricopeptide repeat protein 31 OS=Homo sapiens OX=9606 GN=TTC31 PE=1 SV=3	Homo sapiens	2	1	1	3.2	37.617	340	0.0040816	6.1614	5909600	0	70	0			282
Q02790;H0YFG2;F5H1U3	Peptidyl-prolyl cis-trans isomerase FKBP4;Peptidyl-prolyl cis-trans isomerase FKBP4, N-terminally processed	FKBP4	FKBP4	sp|Q02790|FKBP4_HUMAN Peptidyl-prolyl cis-trans isomerase FKBP4 OS=Homo sapiens OX=9606 GN=FKBP4 PE=1 SV=3	Homo sapiens	3	8	8	20.7	51.804	459	0	137.59	5900400	0	70	0			639
P42704;B8ZZ38;A0A0C4DG06;C9JCA9	Leucine-rich PPR motif-containing protein, mitochondrial	LRPPRC	LRPPRC	sp|P42704|LPPRC_HUMAN Leucine-rich PPR motif-containing protein, mitochondrial OS=Homo sapiens OX=9606 GN=LRPPRC PE=1 SV=3	Homo sapiens	4	15	15	13.3	157.9	1394	0	257.64	5871100	0	70	0			549
Q9UNZ2;F2Z2K0	NSFL1 cofactor p47	NSFL1C	NSFL1C	sp|Q9UNZ2|NSF1C_HUMAN NSFL1 cofactor p47 OS=Homo sapiens OX=9606 GN=NSFL1C PE=1 SV=2;tr|F2Z2K0|F2Z2K0_HUMAN NSFL1 cofactor p47 OS=Homo sapiens OX=9606 GN=NSFL1C PE=1 SV=1	Homo sapiens	2	7	7	27.3	40.572	370	0	244.35	5834800	0	70	0			812
P62913;Q5VVC8	60S ribosomal protein L11	RPL11	RPL11	sp|P62913|RL11_HUMAN 60S ribosomal protein L11 OS=Homo sapiens OX=9606 GN=RPL11 PE=1 SV=2;tr|Q5VVC8|Q5VVC8_HUMAN 60S ribosomal protein L11 OS=Homo sapiens OX=9606 GN=RPL11 PE=1 SV=2	Homo sapiens	2	4	4	27	20.252	178	0	72.881	5698800	0	70	0			617
Q16531;F5GY55;F5GYG8;F5GWI0;F5GZY8;F5H2L3	DNA damage-binding protein 1	DDB1	DDB1	sp|Q16531|DDB1_HUMAN DNA damage-binding protein 1 OS=Homo sapiens OX=9606 GN=DDB1 PE=1 SV=1;tr|F5GY55|F5GY55_HUMAN DNA damage-binding protein 1 OS=Homo sapiens OX=9606 GN=DDB1 PE=1 SV=1	Homo sapiens	6	10	10	12.6	126.97	1140	0	84.004	5654200	0	70	0			697
P05386	60S acidic ribosomal protein P1	RPLP1	RPLP1	sp|P05386|RLA1_HUMAN 60S acidic ribosomal protein P1 OS=Homo sapiens OX=9606 GN=RPLP1 PE=1 SV=1	Homo sapiens	1	4	3	71.1	11.514	114	0	42.94	5636700	0	70	0			433
F5H5D3;Q9BQE3;A0A1W2PQM2;F8VVB9;C9J2C0;Q9NY65;F8VRZ4;F8VS66;F8VX09;F8VWV9;V9GZ17;F8VRK0;A6NHL2;C9K0S6;F8VXZ7;F8W0F6;Q9H853	Tubulin alpha-1C chain;Tubulin alpha-8 chain	TUBA1C;TUBA1B;TUBA8	TUBA1C	tr|F5H5D3|F5H5D3_HUMAN Tubulin alpha chain OS=Homo sapiens OX=9606 GN=TUBA1C PE=1 SV=1;sp|Q9BQE3|TBA1C_HUMAN Tubulin alpha-1C chain OS=Homo sapiens OX=9606 GN=TUBA1C PE=1 SV=1;tr|A0A1W2PQM2|A0A1W2PQM2_HUMAN Tubulin alpha-1C chain OS=Homo sapiens OX=9606 GN	Homo sapiens	17	22	1	55.5	57.73	519	0	9.2578	5532600	0	70	0			257
P49411	Elongation factor Tu, mitochondrial	TUFM	TUFM	sp|P49411|EFTU_HUMAN Elongation factor Tu, mitochondrial OS=Homo sapiens OX=9606 GN=TUFM PE=1 SV=2	Homo sapiens	1	4	4	12.2	49.541	452	0	65.437	5516400	0	70	0			561
P46821;D6RA32;D6RA40;D6RCL2;D6RGJ3;E9PGC8;P78559	Microtubule-associated protein 1B;MAP1B heavy chain;MAP1 light chain LC1	MAP1B	MAP1B	sp|P46821|MAP1B_HUMAN Microtubule-associated protein 1B OS=Homo sapiens OX=9606 GN=MAP1B PE=1 SV=2	Homo sapiens	7	16	16	10.7	270.63	2468	0	204.02	5450200	0	70	0			555
Q02952	A-kinase anchor protein 12	AKAP12	AKAP12	sp|Q02952|AKA12_HUMAN A-kinase anchor protein 12 OS=Homo sapiens OX=9606 GN=AKAP12 PE=1 SV=4	Homo sapiens	1	10	10	8.2	191.48	1782	0	150.18	5404000	0	70	0			641
P19784;H3BSA1;H3BNI9;H3BV19	Casein kinase II subunit alpha	CSNK2A2	CSNK2A2	sp|P19784|CSK22_HUMAN Casein kinase II subunit alpha OS=Homo sapiens OX=9606 GN=CSNK2A2 PE=1 SV=1;tr|H3BSA1|H3BSA1_HUMAN Casein kinase II subunit alpha (Fragment) OS=Homo sapiens OX=9606 GN=CSNK2A2 PE=1 SV=2;tr|H3BNI9|H3BNI9_HUMAN Casein kinase II subuni	Homo sapiens	4	12	12	36.3	41.213	350	0	290.61	5379800	0	70	0			488
P28066	Proteasome subunit alpha type-5	PSMA5	PSMA5	sp|P28066|PSA5_HUMAN Proteasome subunit alpha type-5 OS=Homo sapiens OX=9606 GN=PSMA5 PE=1 SV=3	Homo sapiens	1	7	7	35.3	26.411	241	0	125.17	5276600	0	70	0			516
A0A6I8PS05;A0A6I8PRS0;A0A6I8PL42;B4DER1;A0A6I8PIT3;A0A6I8PIV1;Q9P2J5;A0A6I8PLB3;A0A6I8PLB8;A0A6I8PIP7;A0A6I8PRU9;A0A6I8PTV8	Leucine--tRNA ligase, cytoplasmic	LARS	LARS	tr|A0A6I8PS05|A0A6I8PS05_HUMAN Leucyl-tRNA synthetase OS=Homo sapiens OX=9606 GN=LARS1 PE=1 SV=1;tr|A0A6I8PRS0|A0A6I8PRS0_HUMAN Leucyl-tRNA synthetase OS=Homo sapiens OX=9606 GN=LARS1 PE=1 SV=1;tr|A0A6I8PL42|A0A6I8PL42_HUMAN Leucyl-tRNA synthetase OS=Homo	Homo sapiens	12	10	10	13.1	119.79	1049	0	323.31	5245800	0	70	0			110
Q99832;F8WBP8;F8WAM2;A0A0D9SG95	T-complex protein 1 subunit eta	CCT7	CCT7	sp|Q99832|TCPH_HUMAN T-complex protein 1 subunit eta OS=Homo sapiens OX=9606 GN=CCT7 PE=1 SV=2	Homo sapiens	4	12	12	32.2	59.366	543	0	199.15	5240200	0	70	0			768
H7C0V9;E9PG40;P05067;A0A0A0MRG2;H7C2L2	Amyloid beta A4 protein;N-APP;Soluble APP-alpha;Soluble APP-beta;C99;Beta-amyloid protein 42;Beta-amyloid protein 40;C83;P3(42);P3(40);C80;Gamma-secretase C-terminal fragment 59;Gamma-secretase C-terminal fragment 57;Gamma-secretase C-terminal fragment 50;C31	APP	APP	tr|H7C0V9|H7C0V9_HUMAN ABPP (Fragment) OS=Homo sapiens OX=9606 GN=APP PE=1 SV=1;tr|E9PG40|E9PG40_HUMAN ABPP OS=Homo sapiens OX=9606 GN=APP PE=1 SV=1;sp|P05067|A4_HUMAN Amyloid-beta precursor protein OS=Homo sapiens OX=9606 GN=APP PE=1 SV=3;tr|A0A0A0MRG2|A0	Homo sapiens	5	7	7	14.6	54.981	485	0	98.176	5223800	0	70	0			235
E9PCY7;G8JLB6;P31943;H0YB39;E5RGV0;D6RIU0;H0YBG7;H0YBD7;D6RBM0;P55795;E5RGH4;E7EQJ0;D6RAM1;D6R9T0;D6RFM3;D6RIT2;E7EN40;D6RDU3;D6RJ04;D6RIH9;E5RJ94;D6R9D3;D6RF17;D6RDL0;H0YAQ2	Heterogeneous nuclear ribonucleoprotein H;Heterogeneous nuclear ribonucleoprotein H, N-terminally processed;Heterogeneous nuclear ribonucleoprotein H2	HNRNPH1;HNRNPH2	HNRNPH1	tr|E9PCY7|E9PCY7_HUMAN Heterogeneous nuclear ribonucleoprotein H OS=Homo sapiens OX=9606 GN=HNRNPH1 PE=1 SV=1;tr|G8JLB6|G8JLB6_HUMAN Heterogeneous nuclear ribonucleoprotein H OS=Homo sapiens OX=9606 GN=HNRNPH1 PE=1 SV=1;sp|P31943|HNRH1_HUMAN Heterogeneous	Homo sapiens	25	6	4	21.9	47.087	429	0	164.46	5219300	0	70	0			233
E7EX90;Q14203;Q6AWB1;E7EWF7;C9JUI8;C9J1B7;C9JZA4;C9JTE5;C9JJN7;C9JJD0	Dynactin subunit 1	DCTN1;DKFZp686E0752	DCTN1	tr|E7EX90|E7EX90_HUMAN Dynactin subunit 1 OS=Homo sapiens OX=9606 GN=DCTN1 PE=1 SV=1;sp|Q14203|DCTN1_HUMAN Dynactin subunit 1 OS=Homo sapiens OX=9606 GN=DCTN1 PE=1 SV=3;tr|Q6AWB1|Q6AWB1_HUMAN Dynactin subunit 1 OS=Homo sapiens OX=9606 GN=DCTN1 PE=1 SV=1	Homo sapiens	10	14	14	15.8	139.09	1256	0	267.19	5202000	0	70	0			228
A0A669KBL1;Q93009;H3BND8;F5H2X1;H3BUV0;H3BTM1;H3BRA2;H3BQD1;H3BMF6	Ubiquitin carboxyl-terminal hydrolase 7;Ubiquitin carboxyl-terminal hydrolase	USP7	USP7	tr|A0A669KBL1|A0A669KBL1_HUMAN Ubiquitin carboxyl-terminal hydrolase 7 OS=Homo sapiens OX=9606 GN=USP7 PE=1 SV=1;sp|Q93009|UBP7_HUMAN Ubiquitin carboxyl-terminal hydrolase 7 OS=Homo sapiens OX=9606 GN=USP7 PE=1 SV=2;tr|H3BND8|H3BND8_HUMAN Ubiquitin carboxy	Homo sapiens	9	11	11	14.2	132.33	1137	0	158.9	5128600	0	70	0			109
O95373;E9PLJ0;E9PLB2;O15397	Importin-7	IPO7	IPO7	sp|O95373|IPO7_HUMAN Importin-7 OS=Homo sapiens OX=9606 GN=IPO7 PE=1 SV=1	Homo sapiens	4	9	9	11	119.52	1038	0	222.49	5083200	0	70	0			417
Q15233;C9IZL7;C9JYS8;H7C367;C9J4X2	Non-POU domain-containing octamer-binding protein	NONO	NONO	sp|Q15233|NONO_HUMAN Non-POU domain-containing octamer-binding protein OS=Homo sapiens OX=9606 GN=NONO PE=1 SV=4;tr|C9IZL7|C9IZL7_HUMAN Non-POU domain-containing octamer-binding protein (Fragment) OS=Homo sapiens OX=9606 GN=NONO PE=1 SV=1;tr|C9JYS8|C9JYS8_	Homo sapiens	5	9	9	21.4	54.231	471	0	74.44	5055800	0	70	0			688
P25786;F5GX11;B4DEV8	Proteasome subunit alpha type-1	PSMA1	PSMA1	sp|P25786|PSA1_HUMAN Proteasome subunit alpha type-1 OS=Homo sapiens OX=9606 GN=PSMA1 PE=1 SV=1;tr|F5GX11|F5GX11_HUMAN Proteasome subunit alpha type-1 OS=Homo sapiens OX=9606 GN=PSMA1 PE=1 SV=1	Homo sapiens	3	7	7	30.4	29.555	263	0	60.361	5040400	0	70	0			506
Q13200;H7C1H2;F8WBS8;C9JPC0	26S proteasome non-ATPase regulatory subunit 2	PSMD2	PSMD2	sp|Q13200|PSMD2_HUMAN 26S proteasome non-ATPase regulatory subunit 2 OS=Homo sapiens OX=9606 GN=PSMD2 PE=1 SV=3	Homo sapiens	4	10	10	15	100.2	908	0	130.49	4952200	0	70	0			663
P25789;H0YMZ1;H0YN18;H0YL69;H0YLC2;H0YMA1;H0YLS6;H0YKT8;H0YMI6;H0YMV3;H0YKS0	Proteasome subunit alpha type-4;Proteasome subunit alpha type	PSMA4	PSMA4	sp|P25789|PSA4_HUMAN Proteasome subunit alpha type-4 OS=Homo sapiens OX=9606 GN=PSMA4 PE=1 SV=1;tr|H0YMZ1|H0YMZ1_HUMAN Proteasome subunit alpha type (Fragment) OS=Homo sapiens OX=9606 GN=PSMA4 PE=1 SV=8;tr|H0YN18|H0YN18_HUMAN Proteasome subunit alpha type-	Homo sapiens	11	6	6	23.4	29.483	261	0	49.094	4944600	0	70	0			508
P41091;Q2VIR3;H7BZU1	Eukaryotic translation initiation factor 2 subunit 3;Putative eukaryotic translation initiation factor 2 subunit 3-like protein	EIF2S3;EIF2S3L	EIF2S3	sp|P41091|IF2G_HUMAN Eukaryotic translation initiation factor 2 subunit 3 OS=Homo sapiens OX=9606 GN=EIF2S3 PE=1 SV=3;sp|Q2VIR3|IF2GL_HUMAN Eukaryotic translation initiation factor 2 subunit 3B OS=Homo sapiens OX=9606 GN=EIF2S3B PE=2 SV=2	Homo sapiens	3	10	10	32.4	51.109	472	0	146.75	4895700	0	70	0			545
E7EX73;E9PGM1;E7EUU4;Q04637;C9J6B6;C9JF13;C9K073;C9J2Z7;H7C0V6;A0A6Q8PFB2;REV__F5H7J8;H7C044;REV__Q8NEG2;REV__C9JQZ6;REV__J3KQX6	Eukaryotic translation initiation factor 4 gamma 1	EIF4G1	EIF4G1	tr|E7EX73|E7EX73_HUMAN Eukaryotic translation initiation factor 4 gamma 1 OS=Homo sapiens OX=9606 GN=EIF4G1 PE=1 SV=1;tr|E9PGM1|E9PGM1_HUMAN Eukaryotic translation initiation factor 4 gamma 1 OS=Homo sapiens OX=9606 GN=EIF4G1 PE=1 SV=1;tr|E7EUU4|E7EUU4_HUM	Homo sapiens	15	12	12	12.7	158.64	1436	0	143.8	4750700	0	70	0			226
Q9Y285;K7ER00;K7ER16;K7EK06;K7EPH2	Phenylalanine--tRNA ligase alpha subunit	FARSA	FARSA	sp|Q9Y285|SYFA_HUMAN Phenylalanine--tRNA ligase alpha subunit OS=Homo sapiens OX=9606 GN=FARSA PE=1 SV=3;tr|K7ER00|K7ER00_HUMAN Phenylalanine--tRNA ligase OS=Homo sapiens OX=9606 GN=FARSA PE=1 SV=1;tr|K7ER16|K7ER16_HUMAN Phenylalanine--tRNA ligase alpha su	Homo sapiens	5	5	5	10.6	57.563	508	0	52.267	4686200	0	70	0			818
P38117;M0QY67	Electron transfer flavoprotein subunit beta	ETFB	ETFB	sp|P38117|ETFB_HUMAN Electron transfer flavoprotein subunit beta OS=Homo sapiens OX=9606 GN=ETFB PE=1 SV=3	Homo sapiens	2	3	3	14.1	27.843	255	0	20.075	4667200	0	70	0			540
A0A087X2I1;P62333;H0YJC0;H0YJS8;H0YJE9;H0YJT1	26S protease regulatory subunit 10B	PSMC6	PSMC6	tr|A0A087X2I1|A0A087X2I1_HUMAN 26S proteasome regulatory subunit 10B OS=Homo sapiens OX=9606 GN=PSMC6 PE=1 SV=1;sp|P62333|PRS10_HUMAN 26S proteasome regulatory subunit 10B OS=Homo sapiens OX=9606 GN=PSMC6 PE=1 SV=1;tr|H0YJC0|H0YJC0_HUMAN 26S proteasome reg	Homo sapiens	6	5	5	18.1	45.796	403	0	91.266	4655100	0	70	0			33
Q9UNS2;J3QKR0;C9JLV5;H7C3P9;J3QL22;J3QS85;J3KTQ1;K7ES36	COP9 signalosome complex subunit 3	COPS3	COPS3	sp|Q9UNS2|CSN3_HUMAN COP9 signalosome complex subunit 3 OS=Homo sapiens OX=9606 GN=COPS3 PE=1 SV=3;tr|J3QKR0|J3QKR0_HUMAN COP9 signalosome complex subunit 3 OS=Homo sapiens OX=9606 GN=COPS3 PE=1 SV=1;tr|C9JLV5|C9JLV5_HUMAN COP9 signalosome complex subunit	Homo sapiens	8	4	4	16.1	47.873	423	0	57.194	4645800	0	70	0			811
P43686	26S protease regulatory subunit 6B	PSMC4	PSMC4	sp|P43686|PRS6B_HUMAN 26S proteasome regulatory subunit 6B OS=Homo sapiens OX=9606 GN=PSMC4 PE=1 SV=2	Homo sapiens	1	9	9	31.3	47.366	418	0	114.55	4576900	0	70	0			550
Q01813;B1APP6;V9GY25;H0Y757;H0Y3Y3;V9GYV7;Q5VSR5	ATP-dependent 6-phosphofructokinase, platelet type	PFKP	PFKP	sp|Q01813|PFKAP_HUMAN ATP-dependent 6-phosphofructokinase, platelet type OS=Homo sapiens OX=9606 GN=PFKP PE=1 SV=2;tr|B1APP6|B1APP6_HUMAN ATP-dependent 6-phosphofructokinase, platelet type OS=Homo sapiens OX=9606 GN=PFKP PE=1 SV=2	Homo sapiens	7	14	13	21.6	85.595	784	0	323.31	4561700	0	70	0			637
Q16576;E9PC52;Q5JP01;Q5JNZ6	Histone-binding protein RBBP7	RBBP7	RBBP7	sp|Q16576|RBBP7_HUMAN Histone-binding protein RBBP7 OS=Homo sapiens OX=9606 GN=RBBP7 PE=1 SV=1;tr|E9PC52|E9PC52_HUMAN Histone-binding protein RBBP7 OS=Homo sapiens OX=9606 GN=RBBP7 PE=1 SV=1;tr|Q5JP01|Q5JP01_HUMAN Histone-binding protein RBBP7 (Fragment) O	Homo sapiens	4	7	5	28.2	47.82	425	0	94.294	4526500	0	70	0			699
Q9UQE7	Structural maintenance of chromosomes protein 3	SMC3	SMC3	sp|Q9UQE7|SMC3_HUMAN Structural maintenance of chromosomes protein 3 OS=Homo sapiens OX=9606 GN=SMC3 PE=1 SV=2	Homo sapiens	1	13	13	14.8	141.54	1217	0	231.59	4486700	0	70	0			814
P24534;C9JZW3;F2Z2G2;F8WF65	Elongation factor 1-beta	EEF1B2	EEF1B2	sp|P24534|EF1B_HUMAN Elongation factor 1-beta OS=Homo sapiens OX=9606 GN=EEF1B2 PE=1 SV=3;tr|C9JZW3|C9JZW3_HUMAN Elongation factor 1-beta (Fragment) OS=Homo sapiens OX=9606 GN=EEF1B2 PE=1 SV=1	Homo sapiens	4	5	5	44	24.763	225	0	162.36	4441100	0	70	0			500
P62805	Histone H4	HIST1H4A	HIST1H4A	sp|P62805|H4_HUMAN Histone H4 OS=Homo sapiens OX=9606 GN=H4C1 PE=1 SV=2	Homo sapiens	1	7	7	61.2	11.367	103	0	75.979	4398400	0	70	0			614
H7BYX6;A0A087WTE4;A0A087WTF6;A0A087WX77;A0A087WWD4;A0A087WV75;P13591;A0A0C4DGS4;A0A087X1V2;A0A087WVU1;A0A0D9SF98;A0A087WWJ5	Neural cell adhesion molecule 1	NCAM1	NCAM1	tr|H7BYX6|H7BYX6_HUMAN Neural cell adhesion molecule 1 OS=Homo sapiens OX=9606 GN=NCAM1 PE=1 SV=2;tr|A0A087WTE4|A0A087WTE4_HUMAN Neural cell adhesion molecule 1 OS=Homo sapiens OX=9606 GN=NCAM1 PE=1 SV=1;tr|A0A087WTF6|A0A087WTF6_HUMAN Neural cell adhesion	Homo sapiens	12	6	6	12.3	80.282	725	0	167.58	4393700	0	70	0			6
P17066;P48741	Heat shock 70 kDa protein 6;Putative heat shock 70 kDa protein 7	HSPA6;HSPA7	HSPA6	sp|P17066|HSP76_HUMAN Heat shock 70 kDa protein 6 OS=Homo sapiens OX=9606 GN=HSPA6 PE=1 SV=2;sp|P48741|HSP77_HUMAN Putative heat shock 70 kDa protein 7 OS=Homo sapiens OX=9606 GN=HSPA7 PE=5 SV=2	Homo sapiens	2	6	1	10.7	71.027	643	0	16.13	4391000	0	70	0			479
P38919;I3L3H2;J3QQP0;E9PBH4;F8WE11	Eukaryotic initiation factor 4A-III;Eukaryotic initiation factor 4A-III, N-terminally processed	EIF4A3	EIF4A3	sp|P38919|IF4A3_HUMAN Eukaryotic initiation factor 4A-III OS=Homo sapiens OX=9606 GN=EIF4A3 PE=1 SV=4;tr|I3L3H2|I3L3H2_HUMAN RNA helicase OS=Homo sapiens OX=9606 GN=EIF4A3 PE=1 SV=2	Homo sapiens	5	7	6	21.4	46.871	411	0	82.74	4363000	0	70	0			542
P68366;C9JEV8;C9JQ00;C9JJQ8;C9JDL2	Tubulin alpha-4A chain	TUBA4A	TUBA4A	sp|P68366|TBA4A_HUMAN Tubulin alpha-4A chain OS=Homo sapiens OX=9606 GN=TUBA4A PE=1 SV=1	Homo sapiens	5	16	1	45.8	49.924	448	0	8.3447	4326200	0	70	0			630
Q9P287	BRCA2 and CDKN1A-interacting protein	BCCIP	BCCIP	sp|Q9P287|BCCIP_HUMAN BRCA2 and CDKN1A-interacting protein OS=Homo sapiens OX=9606 GN=BCCIP PE=1 SV=1	Homo sapiens	1	4	4	20.7	35.979	314	0	66.25	4285000	0	70	0			798
G8JLG1;Q14683;A0A6Q8PHC3;V9GY57	Structural maintenance of chromosomes protein;Structural maintenance of chromosomes protein 1A	SMC1A	SMC1A	tr|G8JLG1|G8JLG1_HUMAN Structural maintenance of chromosomes protein OS=Homo sapiens OX=9606 GN=SMC1A PE=1 SV=2;sp|Q14683|SMC1A_HUMAN Structural maintenance of chromosomes protein 1A OS=Homo sapiens OX=9606 GN=SMC1A PE=1 SV=2;tr|A0A6Q8PHC3|A0A6Q8PHC3_HUMAN	Homo sapiens	4	11	11	10.7	140.86	1211	0	96.438	4284600	0	70	0			283
P13674	Prolyl 4-hydroxylase subunit alpha-1	P4HA1	P4HA1	sp|P13674|P4HA1_HUMAN Prolyl 4-hydroxylase subunit alpha-1 OS=Homo sapiens OX=9606 GN=P4HA1 PE=1 SV=2	Homo sapiens	1	15	15	35.6	61.049	534	0	199.24	4217600	0	70	0			468
P12277;G3V4N7;G3V461;H0YJG0	Creatine kinase B-type	CKB	CKB	sp|P12277|KCRB_HUMAN Creatine kinase B-type OS=Homo sapiens OX=9606 GN=CKB PE=1 SV=1;tr|G3V4N7|G3V4N7_HUMAN Creatine kinase (Fragment) OS=Homo sapiens OX=9606 GN=CKB PE=1 SV=1;tr|G3V461|G3V461_HUMAN Creatine kinase (Fragment) OS=Homo sapiens OX=9606 GN=CKB	Homo sapiens	4	6	6	24.9	42.644	381	0	272.48	4157200	0	70	0			461
P38646;D6RA73;D6RJI2;A0A3B3ITI4;H0Y8S0	Stress-70 protein, mitochondrial	HSPA9	HSPA9	sp|P38646|GRP75_HUMAN Stress-70 protein, mitochondrial OS=Homo sapiens OX=9606 GN=HSPA9 PE=1 SV=2	Homo sapiens	5	7	7	15.3	73.68	679	0	178.21	4119900	0	70	0			541
A0A0A0MSI0;Q06830;A0A0A0MRQ5;H7C3T4;Q13162	Peroxiredoxin-1	PRDX1	PRDX1	tr|A0A0A0MSI0|A0A0A0MSI0_HUMAN Peroxiredoxin-1 (Fragment) OS=Homo sapiens OX=9606 GN=PRDX1 PE=1 SV=1;sp|Q06830|PRDX1_HUMAN Peroxiredoxin-1 OS=Homo sapiens OX=9606 GN=PRDX1 PE=1 SV=1;tr|A0A0A0MRQ5|A0A0A0MRQ5_HUMAN Peroxiredoxin-1 OS=Homo sapiens OX=9606 GN=	Homo sapiens	5	6	5	29.8	18.976	171	0	44.097	4055100	0	70	0			39
P51665;H3BNT7;H3BTM8;H3BQV2	26S proteasome non-ATPase regulatory subunit 7	PSMD7	PSMD7	sp|P51665|PSMD7_HUMAN 26S proteasome non-ATPase regulatory subunit 7 OS=Homo sapiens OX=9606 GN=PSMD7 PE=1 SV=2;tr|H3BNT7|H3BNT7_HUMAN 26S proteasome non-ATPase regulatory subunit 7 OS=Homo sapiens OX=9606 GN=PSMD7 PE=1 SV=1;tr|H3BTM8|H3BTM8_HUMAN 26S prot	Homo sapiens	4	6	6	28.7	37.025	324	0	57.324	4040300	0	70	0			569
P05141;V9GYG0;P12235;Q9H0C2	ADP/ATP translocase 2;ADP/ATP translocase 2, N-terminally processed	SLC25A5	SLC25A5	sp|P05141|ADT2_HUMAN ADP/ATP translocase 2 OS=Homo sapiens OX=9606 GN=SLC25A5 PE=1 SV=7	Homo sapiens	4	7	4	24.5	32.852	298	0	49.691	4029300	0	70	0			432
P62191	26S protease regulatory subunit 4	PSMC1	PSMC1	sp|P62191|PRS4_HUMAN 26S proteasome regulatory subunit 4 OS=Homo sapiens OX=9606 GN=PSMC1 PE=1 SV=1	Homo sapiens	1	3	3	9.8	49.184	440	0	73.007	3944700	0	70	0			603
P25788;G3V4X5;G3V3W4;G3V5N4	Proteasome subunit alpha type-3	PSMA3	PSMA3	sp|P25788|PSA3_HUMAN Proteasome subunit alpha type-3 OS=Homo sapiens OX=9606 GN=PSMA3 PE=1 SV=2;tr|G3V4X5|G3V4X5_HUMAN Proteasome subunit alpha type-3 OS=Homo sapiens OX=9606 GN=PSMA3 PE=1 SV=1	Homo sapiens	4	6	6	25.1	28.433	255	0	163.68	3926400	0	70	0			507
E7ENZ3;B7ZAR1;E9PCA1;P48643	T-complex protein 1 subunit epsilon	CCT5	CCT5	tr|E7ENZ3|E7ENZ3_HUMAN T-complex protein 1 subunit epsilon OS=Homo sapiens OX=9606 GN=CCT5 PE=1 SV=1;tr|B7ZAR1|B7ZAR1_HUMAN T-complex protein 1 subunit epsilon OS=Homo sapiens OX=9606 GN=CCT5 PE=1 SV=1;tr|E9PCA1|E9PCA1_HUMAN T-complex protein 1 subunit eps	Homo sapiens	4	8	8	19.8	53.848	486	0	108.64	3911900	0	70	0			160
Q6P2Q9;I3L0J9;I3L3Z8	Pre-mRNA-processing-splicing factor 8	PRPF8	PRPF8	sp|Q6P2Q9|PRP8_HUMAN Pre-mRNA-processing-splicing factor 8 OS=Homo sapiens OX=9606 GN=PRPF8 PE=1 SV=2	Homo sapiens	3	15	15	7.7	273.6	2335	0	175.78	3901100	0	70	0			718
Q86XM0	Cation channel sperm-associated protein subunit delta	CATSPERD	CATSPERD	sp|Q86XM0|CTSRD_HUMAN Cation channel sperm-associated protein subunit delta OS=Homo sapiens OX=9606 GN=CATSPERD PE=1 SV=3	Homo sapiens	1	1	1	1.8	90.467	798	1	-2	3763400	0	70	0	+		733
P12814;H9KV75;H7C5W8;G3V2W4;G3V2N5;H0YJ11;H0YJW3	Alpha-actinin-1	ACTN1	ACTN1	sp|P12814|ACTN1_HUMAN Alpha-actinin-1 OS=Homo sapiens OX=9606 GN=ACTN1 PE=1 SV=2;tr|H9KV75|H9KV75_HUMAN Alpha-actinin-1 OS=Homo sapiens OX=9606 GN=ACTN1 PE=1 SV=1	Homo sapiens	7	17	5	25.9	103.06	892	0	188.37	3759800	0	70	0			463
H0Y8E6;P49736	DNA replication licensing factor MCM2	MCM2	MCM2	tr|H0Y8E6|H0Y8E6_HUMAN DNA replication licensing factor MCM2 (Fragment) OS=Homo sapiens OX=9606 GN=MCM2 PE=1 SV=1;sp|P49736|MCM2_HUMAN DNA replication licensing factor MCM2 OS=Homo sapiens OX=9606 GN=MCM2 PE=1 SV=4	Homo sapiens	2	11	11	17.1	93.998	836	0	213.93	3726900	0	70	0			289
Q32P28;E2QRI1;H7C2W6	Prolyl 3-hydroxylase 1	LEPRE1	LEPRE1	sp|Q32P28|P3H1_HUMAN Prolyl 3-hydroxylase 1 OS=Homo sapiens OX=9606 GN=P3H1 PE=1 SV=2	Homo sapiens	3	5	5	7.5	83.393	736	0	41.155	3702600	0	70	0			703
P09874;Q5VX84;Q5VX85	Poly [ADP-ribose] polymerase 1	PARP1	PARP1	sp|P09874|PARP1_HUMAN Poly [ADP-ribose] polymerase 1 OS=Homo sapiens OX=9606 GN=PARP1 PE=1 SV=4	Homo sapiens	3	9	9	13.3	113.08	1014	0	115.65	3676700	0	70	0			447
O75533;H7C341	Splicing factor 3B subunit 1	SF3B1	SF3B1	sp|O75533|SF3B1_HUMAN Splicing factor 3B subunit 1 OS=Homo sapiens OX=9606 GN=SF3B1 PE=1 SV=3	Homo sapiens	2	7	7	7.8	145.83	1304	0	55.829	3672600	0	70	0			410
P22102;C9JBJ1;C9JTV6;F8WD69;C9JZG2;C9JKQ7;H7C366	Trifunctional purine biosynthetic protein adenosine-3;Phosphoribosylamine--glycine ligase;Phosphoribosylformylglycinamidine cyclo-ligase;Phosphoribosylglycinamide formyltransferase	GART	GART	sp|P22102|PUR2_HUMAN Trifunctional purine biosynthetic protein adenosine-3 OS=Homo sapiens OX=9606 GN=GART PE=1 SV=1	Homo sapiens	7	11	11	18.2	107.77	1010	0	119.2	3645700	0	70	0			494
O15355	Protein phosphatase 1G	PPM1G	PPM1G	sp|O15355|PPM1G_HUMAN Protein phosphatase 1G OS=Homo sapiens OX=9606 GN=PPM1G PE=1 SV=1	Homo sapiens	1	9	9	22	59.271	546	0	116.62	3627300	0	70	0			392
Q96QR8	Transcriptional activator protein Pur-beta	PURB	PURB	sp|Q96QR8|PURB_HUMAN Transcriptional activator protein Pur-beta OS=Homo sapiens OX=9606 GN=PURB PE=1 SV=3	Homo sapiens	1	7	7	44.6	33.24	312	0	81.766	3597500	0	70	0			764
A0A6Q8PHB5;A0A6Q8PHP0;P49902;Q5JUV4;A0A6Q8PFH2;A0A6Q8PG36;Q5JUV6;H0YHR8	Cytosolic purine 5-nucleotidase	NT5C2	NT5C2	tr|A0A6Q8PHB5|A0A6Q8PHB5_HUMAN Cytosolic purine 5-nucleotidase OS=Homo sapiens OX=9606 GN=NT5C2 PE=1 SV=1;tr|A0A6Q8PHP0|A0A6Q8PHP0_HUMAN Cytosolic purine 5-nucleotidase OS=Homo sapiens OX=9606 GN=NT5C2 PE=1 SV=1;sp|P49902|5NTC_HUMAN Cytosolic purine 5-n	Homo sapiens	8	8	8	29.4	50.147	436	0	110.67	3502000	0	70	0			118
F8VPD4;P27708;H7C3Z5;H7BZB3	CAD protein;Glutamine-dependent carbamoyl-phosphate synthase;Aspartate carbamoyltransferase;Dihydroorotase	CAD	CAD	tr|F8VPD4|F8VPD4_HUMAN Aspartate carbamoyltransferase OS=Homo sapiens OX=9606 GN=CAD PE=1 SV=1;sp|P27708|PYR1_HUMAN CAD protein OS=Homo sapiens OX=9606 GN=CAD PE=1 SV=3	Homo sapiens	4	8	8	5.6	236.02	2162	0	98.539	3495700	0	70	0			260
H0YA96;D6RAF8;H0Y8G5;Q14103;D6RF44;D6RBQ9	Heterogeneous nuclear ribonucleoprotein D0	HNRNPD	HNRNPD	tr|H0YA96|H0YA96_HUMAN Heterogeneous nuclear ribonucleoprotein D0 (Fragment) OS=Homo sapiens OX=9606 GN=HNRNPD PE=1 SV=1;tr|D6RAF8|D6RAF8_HUMAN Heterogeneous nuclear ribonucleoprotein D0 (Fragment) OS=Homo sapiens OX=9606 GN=HNRNPD PE=1 SV=1;tr|H0Y8G5|H0Y8	Homo sapiens	6	3	2	20.5	23.811	210	0	31.4	3267900	0	70	0			206
A0A024RA52;P25787;H3BT36;C9JCK5;H7C402	Proteasome subunit alpha type;Proteasome subunit alpha type-2	PSMA2	PSMA2	tr|A0A024RA52|A0A024RA52_HUMAN Proteasome subunit alpha type OS=Homo sapiens OX=9606 GN=PSMA2 PE=1 SV=1;sp|P25787|PSA2_HUMAN Proteasome subunit alpha type-2 OS=Homo sapiens OX=9606 GN=PSMA2 PE=1 SV=2	Homo sapiens	5	5	5	36.8	25.898	234	0	87.574	3230900	0	70	0			2
Q15181;Q5SQT6	Inorganic pyrophosphatase	PPA1	PPA1	sp|Q15181|IPYR_HUMAN Inorganic pyrophosphatase OS=Homo sapiens OX=9606 GN=PPA1 PE=1 SV=2;tr|Q5SQT6|Q5SQT6_HUMAN Inorganic diphosphatase OS=Homo sapiens OX=9606 GN=PPA1 PE=1 SV=1	Homo sapiens	2	3	3	13.8	32.66	289	0	19.913	3220400	0	70	0			687
O75607	Nucleoplasmin-3	NPM3	NPM3	sp|O75607|NPM3_HUMAN Nucleoplasmin-3 OS=Homo sapiens OX=9606 GN=NPM3 PE=1 SV=3	Homo sapiens	1	2	2	10.1	19.343	178	0	129.27	3217100	0	70	0			411
J3KTA4;P17844;J3KRZ1;J3QSF1;J3QRQ7;X6RLV5;J3QR02;J3KRX8;J3KTQ4	Probable ATP-dependent RNA helicase DDX5	DDX5	DDX5	tr|J3KTA4|J3KTA4_HUMAN DEAD box protein 5 OS=Homo sapiens OX=9606 GN=DDX5 PE=1 SV=1;sp|P17844|DDX5_HUMAN Probable ATP-dependent RNA helicase DDX5 OS=Homo sapiens OX=9606 GN=DDX5 PE=1 SV=1	Homo sapiens	9	11	6	19.7	69.086	614	0	60.382	3207900	0	70	0			326
A0A087WW66;Q99460;H7C378;H7BZR6;C9J9M4	26S proteasome non-ATPase regulatory subunit 1	PSMD1	PSMD1	tr|A0A087WW66|A0A087WW66_HUMAN 26S proteasome non-ATPase regulatory subunit 1 OS=Homo sapiens OX=9606 GN=PSMD1 PE=1 SV=1;sp|Q99460|PSMD1_HUMAN 26S proteasome non-ATPase regulatory subunit 1 OS=Homo sapiens OX=9606 GN=PSMD1 PE=1 SV=2	Homo sapiens	5	7	7	11.5	105.85	953	0	76.05	3205000	0	70	0			18
P35606;D6R997;D6RBZ7;D6RCL6;D6RBG7;D6RBT6;H0Y938	Coatomer subunit beta	COPB2	COPB2	sp|P35606|COPB2_HUMAN Coatomer subunit beta OS=Homo sapiens OX=9606 GN=COPB2 PE=1 SV=2	Homo sapiens	7	8	8	12.7	102.49	906	0	168.42	3196600	0	70	0			537
Q9NZI8	Insulin-like growth factor 2 mRNA-binding protein 1	IGF2BP1	IGF2BP1	sp|Q9NZI8|IF2B1_HUMAN Insulin-like growth factor 2 mRNA-binding protein 1 OS=Homo sapiens OX=9606 GN=IGF2BP1 PE=1 SV=2	Homo sapiens	1	10	8	22.4	63.48	577	0	211.52	3196000	0	70	0			796
O14980;C9J673;C9JKM9;C9IZS4;C9JQ02;C9JV99;C9JF49;C9IYM2;H7BZC5;F8WF71	Exportin-1	XPO1	XPO1	sp|O14980|XPO1_HUMAN Exportin-1 OS=Homo sapiens OX=9606 GN=XPO1 PE=1 SV=1	Homo sapiens	10	7	7	10	123.38	1071	0	130.44	3181500	0	70	0			388
K7ERF1;Q9UBQ5;K7ES31;A0A087WVB9;K7EQM4;K7EK53	Eukaryotic translation initiation factor 3 subunit K	EIF3K	EIF3K	tr|K7ERF1|K7ERF1_HUMAN Eukaryotic translation initiation factor 3 subunit K OS=Homo sapiens OX=9606 GN=EIF3K PE=1 SV=1;sp|Q9UBQ5|EIF3K_HUMAN Eukaryotic translation initiation factor 3 subunit K OS=Homo sapiens OX=9606 GN=EIF3K PE=1 SV=1;tr|K7ES31|K7ES31_HU	Homo sapiens	6	6	6	39.6	22.095	192	0	79.688	3141500	0	70	0			342
Q13561;H0YI98;F8W1I6;F8VW18;H0YHL1;F8VRV7	Dynactin subunit 2	DCTN2	DCTN2	sp|Q13561|DCTN2_HUMAN Dynactin subunit 2 OS=Homo sapiens OX=9606 GN=DCTN2 PE=1 SV=4;tr|H0YI98|H0YI98_HUMAN Dynactin subunit 2 (Fragment) OS=Homo sapiens OX=9606 GN=DCTN2 PE=1 SV=1;tr|F8W1I6|F8W1I6_HUMAN Dynactin subunit 2 OS=Homo sapiens OX=9606 GN=DCTN2 P	Homo sapiens	6	5	5	15	44.23	401	0	126.65	3117400	0	70	0			668
P28072;I3L3X7;A0A087X2I4	Proteasome subunit beta type-6	PSMB6	PSMB6	sp|P28072|PSB6_HUMAN Proteasome subunit beta type-6 OS=Homo sapiens OX=9606 GN=PSMB6 PE=1 SV=4	Homo sapiens	3	5	5	17.6	25.357	239	0	49.923	3006100	0	70	0			518
Q8TEX9;H0YN14;H0YN07;H0YMR4;H0YLV0;H0YL92;H0YK93;H0YKG5	Importin-4	IPO4	IPO4	sp|Q8TEX9|IPO4_HUMAN Importin-4 OS=Homo sapiens OX=9606 GN=IPO4 PE=1 SV=2;tr|H0YN14|H0YN14_HUMAN Importin-4 OS=Homo sapiens OX=9606 GN=IPO4 PE=1 SV=1	Homo sapiens	8	11	11	15.4	118.71	1081	0	116.15	2893800	0	70	0			745
C9JP16;O75718	Cartilage-associated protein	CRTAP	CRTAP	tr|C9JP16|C9JP16_HUMAN Cartilage-associated protein OS=Homo sapiens OX=9606 GN=CRTAP PE=1 SV=1;sp|O75718|CRTAP_HUMAN Cartilage-associated protein OS=Homo sapiens OX=9606 GN=CRTAP PE=1 SV=1	Homo sapiens	2	4	4	9.8	41.432	358	0	31.064	2870700	0	70	0			174
H0YEN5;P15880;E9PQD7;E9PMM9;I3L404;E9PPT0;E9PM36;H3BNG3;H0YE27	40S ribosomal protein S2	RPS2	RPS2	tr|H0YEN5|H0YEN5_HUMAN 40S ribosomal protein S2 (Fragment) OS=Homo sapiens OX=9606 GN=RPS2 PE=1 SV=1;sp|P15880|RS2_HUMAN 40S ribosomal protein S2 OS=Homo sapiens OX=9606 GN=RPS2 PE=1 SV=2;tr|E9PQD7|E9PQD7_HUMAN 40S ribosomal protein S2 OS=Homo sapiens OX=9	Homo sapiens	9	6	6	33.3	21.154	195	0	51.805	2855400	0	70	0			292
O15160;A0A2R8YEZ4;A0A2R8Y5D3;E7EQB9;H0Y723;A0A2R8Y8D6	DNA-directed RNA polymerases I and III subunit RPAC1	POLR1C	POLR1C	sp|O15160|RPAC1_HUMAN DNA-directed RNA polymerases I and III subunit RPAC1 OS=Homo sapiens OX=9606 GN=POLR1C PE=1 SV=1;tr|A0A2R8YEZ4|A0A2R8YEZ4_HUMAN DNA-directed RNA polymerases I and III subunit RPAC1 OS=Homo sapiens OX=9606 GN=POLR1C PE=1 SV=1;tr|A0A2R8	Homo sapiens	6	5	1	19.9	39.249	346	0	64.036	2849100	0	70	0			391
A0A6Q8PGW4;A0A6Q8PGI6;A0A6Q8PGA8;A0A6Q8PHH9;A0A6Q8PGZ8;P41250;A0A6Q8PHI7;H7C443;A0A6Q8PFZ6;A0A6Q8PH49;A0A6Q8PF45	Glycine--tRNA ligase	GARS	GARS	tr|A0A6Q8PGW4|A0A6Q8PGW4_HUMAN Diadenosine tetraphosphate synthetase OS=Homo sapiens OX=9606 GN=GARS1 PE=1 SV=1;tr|A0A6Q8PGI6|A0A6Q8PGI6_HUMAN Diadenosine tetraphosphate synthetase OS=Homo sapiens OX=9606 GN=GARS1 PE=1 SV=1;tr|A0A6Q8PGA8|A0A6Q8PGA8_HUMAN D	Homo sapiens	11	8	8	19.3	69.931	616	0	103.66	2823600	0	70	0			116
Q13045;J3KS54;J3KS39;K7EQZ7;J3QQQ2	Protein flightless-1 homolog	FLII	FLII	sp|Q13045|FLII_HUMAN Protein flightless-1 homolog OS=Homo sapiens OX=9606 GN=FLII PE=1 SV=2	Homo sapiens	5	10	10	10.3	144.75	1269	0	126.69	2810400	0	70	0			660
P62195;J3QSA9;J3QQM1;J3QLH6;J3KRP2;J3QSE0;J3QRW1;J3QRR3;J3KTQ9;A0A6Q8PGU6;Q8NB90	26S protease regulatory subunit 8	PSMC5	PSMC5	sp|P62195|PRS8_HUMAN 26S proteasome regulatory subunit 8 OS=Homo sapiens OX=9606 GN=PSMC5 PE=1 SV=1;tr|J3QSA9|J3QSA9_HUMAN 26S proteasome regulatory subunit 8 (Fragment) OS=Homo sapiens OX=9606 GN=PSMC5 PE=1 SV=1;tr|J3QQM1|J3QQM1_HUMAN 26S proteasome regul	Homo sapiens	11	7	7	29.1	45.626	406	0	83.354	2783400	0	70	0			604
O00299	Chloride intracellular channel protein 1	CLIC1	CLIC1	sp|O00299|CLIC1_HUMAN Chloride intracellular channel protein 1 OS=Homo sapiens OX=9606 GN=CLIC1 PE=1 SV=4	Homo sapiens	1	7	7	49.8	26.922	241	0	170.19	2780400	0	70	0			376
P00558	Phosphoglycerate kinase 1	PGK1	PGK1	sp|P00558|PGK1_HUMAN Phosphoglycerate kinase 1 OS=Homo sapiens OX=9606 GN=PGK1 PE=1 SV=3	Homo sapiens	1	4	4	13.2	44.614	417	0	40.779	2763600	0	70	0			421
B1AHB1;P33992;B1AHB2;B1AHA9	DNA helicase;DNA replication licensing factor MCM5	MCM5	MCM5	tr|B1AHB1|B1AHB1_HUMAN DNA helicase OS=Homo sapiens OX=9606 GN=MCM5 PE=1 SV=1;sp|P33992|MCM5_HUMAN DNA replication licensing factor MCM5 OS=Homo sapiens OX=9606 GN=MCM5 PE=1 SV=5	Homo sapiens	4	3	3	5.8	77.592	691	0	19.383	2731300	0	70	0			134
H0Y4R1;P12268;E7ETK5	Inosine-5-monophosphate dehydrogenase 2	IMPDH2	IMPDH2	tr|H0Y4R1|H0Y4R1_HUMAN Inosine-5-monophosphate dehydrogenase 2 (Fragment) OS=Homo sapiens OX=9606 GN=IMPDH2 PE=1 SV=1;sp|P12268|IMDH2_HUMAN Inosine-5-monophosphate dehydrogenase 2 OS=Homo sapiens OX=9606 GN=IMPDH2 PE=1 SV=2;tr|E7ETK5|E7ETK5_HUMAN Inosine	Homo sapiens	3	7	7	18.3	50.957	470	0	56.512	2703700	0	70	0			286
Q9UBF2	Coatomer subunit gamma-2	COPG2	COPG2	sp|Q9UBF2|COPG2_HUMAN Coatomer subunit gamma-2 OS=Homo sapiens OX=9606 GN=COPG2 PE=1 SV=1	Homo sapiens	1	6	4	10	97.621	871	0	94.518	2701500	0	70	0			799
C9J2Y9;P30876;C9J4M6	DNA-directed RNA polymerase;DNA-directed RNA polymerase II subunit RPB2	POLR2B	POLR2B	tr|C9J2Y9|C9J2Y9_HUMAN DNA-directed RNA polymerase subunit beta OS=Homo sapiens OX=9606 GN=POLR2B PE=1 SV=2;sp|P30876|RPB2_HUMAN DNA-directed RNA polymerase II subunit RPB2 OS=Homo sapiens OX=9606 GN=POLR2B PE=1 SV=1;tr|C9J4M6|C9J4M6_HUMAN DNA-directed RNA	Homo sapiens	3	9	9	9.9	133.06	1167	0	71.934	2683900	0	70	0			168
J3KS05;P83916;B5MD17;K7ELA4;C9JWS9	Chromobox protein homolog 1	CBX1	CBX1	tr|J3KS05|J3KS05_HUMAN Chromobox protein homolog 1 (Fragment) OS=Homo sapiens OX=9606 GN=CBX1 PE=1 SV=8;sp|P83916|CBX1_HUMAN Chromobox protein homolog 1 OS=Homo sapiens OX=9606 GN=CBX1 PE=1 SV=1;tr|B5MD17|B5MD17_HUMAN Chromobox protein homolog 1 (Fragment)	Homo sapiens	5	5	4	32.9	20.03	173	0	179.84	2643700	0	70	0			325
P56589	Peroxisomal biogenesis factor 3	PEX3	PEX3	sp|P56589|PEX3_HUMAN Peroxisomal biogenesis factor 3 OS=Homo sapiens OX=9606 GN=PEX3 PE=1 SV=1	Homo sapiens	1	1	1	2.7	42.139	373	0.007772	5.9405	2599800	0	70	0			589
Q08945;E9PMD4	FACT complex subunit SSRP1	SSRP1	SSRP1	sp|Q08945|SSRP1_HUMAN FACT complex subunit SSRP1 OS=Homo sapiens OX=9606 GN=SSRP1 PE=1 SV=1	Homo sapiens	2	5	5	9.3	81.074	709	0	135.81	2576400	0	70	0			648
P62701;Q8TD47;C9JEH7;P22090	40S ribosomal protein S4, X isoform	RPS4X	RPS4X	sp|P62701|RS4X_HUMAN 40S ribosomal protein S4, X isoform OS=Homo sapiens OX=9606 GN=RPS4X PE=1 SV=2	Homo sapiens	4	6	6	27	29.597	263	0	37.289	2566400	0	70	0			612
Q92769;Q5TEE2;Q13547;E5RK19;E5RFI6;E5RJ04;E5RGV4;E5RHE7;E5RH52;E5RG37;E5RFP9;H3BM24	Histone deacetylase 2;Histone deacetylase 1	HDAC2;HDAC1	HDAC2	sp|Q92769|HDAC2_HUMAN Histone deacetylase 2 OS=Homo sapiens OX=9606 GN=HDAC2 PE=1 SV=2;tr|Q5TEE2|Q5TEE2_HUMAN Histone deacetylase (Fragment) OS=Homo sapiens OX=9606 GN=HDAC1 PE=1 SV=1;sp|Q13547|HDAC1_HUMAN Histone deacetylase 1 OS=Homo sapiens OX=9606 GN=H	Homo sapiens	12	3	3	8.6	55.364	488	0	21.273	2557800	0	70	0			749
D6RAX7;Q9BT78;D6RFN0;D6RD63	COP9 signalosome complex subunit 4	COPS4	COPS4	tr|D6RAX7|D6RAX7_HUMAN COP9 signalosome complex subunit 4 OS=Homo sapiens OX=9606 GN=COPS4 PE=1 SV=1;sp|Q9BT78|CSN4_HUMAN COP9 signalosome complex subunit 4 OS=Homo sapiens OX=9606 GN=COPS4 PE=1 SV=1;tr|D6RFN0|D6RFN0_HUMAN COP9 signalosome complex subunit	Homo sapiens	4	7	7	25.5	47.726	420	0	167.69	2540000	0	70	0			209
Q6S8J3;P0CG38;P0CG39;Q9BYX7	POTE ankyrin domain family member E;POTE ankyrin domain family member I;POTE ankyrin domain family member J;Putative beta-actin-like protein 3;Putative beta-actin-like protein 3, N-terminally processed	POTEE;POTEI;POTEJ;POTEKP	POTEE	sp|Q6S8J3|POTEE_HUMAN POTE ankyrin domain family member E OS=Homo sapiens OX=9606 GN=POTEE PE=2 SV=3;sp|P0CG38|POTEI_HUMAN POTE ankyrin domain family member I OS=Homo sapiens OX=9606 GN=POTEI PE=3 SV=1;sp|P0CG39|POTEJ_HUMAN POTE ankyrin domain family membe	Homo sapiens	4	10	1	10.4	121.36	1075	0	6.7955	2539900	0	70	0			720
O14929;F8W9G7	Histone acetyltransferase type B catalytic subunit	HAT1	HAT1	sp|O14929|HAT1_HUMAN Histone acetyltransferase type B catalytic subunit OS=Homo sapiens OX=9606 GN=HAT1 PE=1 SV=1	Homo sapiens	2	4	4	11.5	49.512	419	0	151.74	2478900	0	70	0			386
Q9NUD7	Uncharacterized protein C20orf96	C20orf96	C20orf96	sp|Q9NUD7|CT096_HUMAN Uncharacterized protein C20orf96 OS=Homo sapiens OX=9606 GN=C20orf96 PE=2 SV=2	Homo sapiens	1	1	1	2.5	42.859	363	0.0052493	5.9993	2473900	0	70	0			794
G3V5Z7;P60900;G3V295;G3V4S5;G3V2S7;H0YJC4;G3V3U4;G3V3I1	Proteasome subunit alpha type;Proteasome subunit alpha type-6	PSMA6	PSMA6	tr|G3V5Z7|G3V5Z7_HUMAN Proteasome subunit alpha type OS=Homo sapiens OX=9606 GN=PSMA6 PE=1 SV=1;sp|P60900|PSA6_HUMAN Proteasome subunit alpha type-6 OS=Homo sapiens OX=9606 GN=PSMA6 PE=1 SV=1;tr|G3V295|G3V295_HUMAN Proteasome subunit alpha type OS=Homo sap	Homo sapiens	8	4	4	19.4	28.147	252	0	38.401	2416500	0	70	0			281
H3BQF1;P07741;H3BSW3;H3BQZ9;H3BQB1	Adenine phosphoribosyltransferase	APRT	APRT	tr|H3BQF1|H3BQF1_HUMAN Adenine phosphoribosyltransferase (Fragment) OS=Homo sapiens OX=9606 GN=APRT PE=1 SV=8;sp|P07741|APT_HUMAN Adenine phosphoribosyltransferase OS=Homo sapiens OX=9606 GN=APRT PE=1 SV=2;tr|H3BSW3|H3BSW3_HUMAN Adenine phosphoribosyltrans	Homo sapiens	5	3	3	23	16.323	148	0	34.917	2387800	0	70	0			304
O95347;Q5T821;A0A0C4DGE5	Structural maintenance of chromosomes protein 2	SMC2	SMC2	sp|O95347|SMC2_HUMAN Structural maintenance of chromosomes protein 2 OS=Homo sapiens OX=9606 GN=SMC2 PE=1 SV=2	Homo sapiens	3	9	9	9.1	135.65	1197	0	96.579	2318400	0	70	0			416
O00232	26S proteasome non-ATPase regulatory subunit 12	PSMD12	PSMD12	sp|O00232|PSD12_HUMAN 26S proteasome non-ATPase regulatory subunit 12 OS=Homo sapiens OX=9606 GN=PSMD12 PE=1 SV=3	Homo sapiens	1	4	4	14.5	52.904	456	0	183.13	2289600	0	70	0			374
O96007	Molybdopterin synthase catalytic subunit	MOCS2	MOCS2	sp|O96007|MOC2B_HUMAN Molybdopterin synthase catalytic subunit OS=Homo sapiens OX=9606 GN=MOCS2 PE=1 SV=1	Homo sapiens	1	1	1	9.6	20.944	188	1	-2	2287700	0	70	0	+		419
Q58FF6	Putative heat shock protein HSP 90-beta 4	HSP90AB4P	HSP90AB4P	sp|Q58FF6|H90B4_HUMAN Putative heat shock protein HSP 90-beta 4 OS=Homo sapiens OX=9606 GN=HSP90AB4P PE=5 SV=1	Homo sapiens	1	8	1	11.7	58.264	505	0	51.801	2283100	0	70	0			706
F5GXR3;P20962	Parathymosin	PTMS	PTMS	tr|F5GXR3|F5GXR3_HUMAN Parathymosin OS=Homo sapiens OX=9606 GN=PTMS PE=1 SV=1;sp|P20962|PTMS_HUMAN Parathymosin OS=Homo sapiens OX=9606 GN=PTMS PE=1 SV=2	Homo sapiens	2	2	2	13.5	12.074	104	0	50.25	2241800	0	70	0			252
A0A2R8YFH0;E9PHA6;A0A2R8Y6P0;A0A2R8YG02;P43246;A0A2R8Y7S8;A0A2R8Y713	DNA mismatch repair protein Msh2	MSH2	MSH2	tr|A0A2R8YFH0|A0A2R8YFH0_HUMAN DNA mismatch repair protein OS=Homo sapiens OX=9606 GN=MSH2 PE=1 SV=1;tr|E9PHA6|E9PHA6_HUMAN DNA mismatch repair protein OS=Homo sapiens OX=9606 GN=MSH2 PE=1 SV=1;tr|A0A2R8Y6P0|A0A2R8Y6P0_HUMAN DNA mismatch repair protein OS=	Homo sapiens	7	8	8	11.3	102.86	918	0	61.857	2204800	0	70	0			80
Q7KZF4;H7C597	Staphylococcal nuclease domain-containing protein 1	SND1	SND1	sp|Q7KZF4|SND1_HUMAN Staphylococcal nuclease domain-containing protein 1 OS=Homo sapiens OX=9606 GN=SND1 PE=1 SV=1	Homo sapiens	2	9	9	16.5	102	910	0	210.26	2179100	0	70	0			725
P16152;E9PQ63;A8MTM1	Carbonyl reductase [NADPH] 1	CBR1	CBR1	sp|P16152|CBR1_HUMAN Carbonyl reductase [NADPH] 1 OS=Homo sapiens OX=9606 GN=CBR1 PE=1 SV=3;tr|E9PQ63|E9PQ63_HUMAN Carbonyl reductase [NADPH] 1 OS=Homo sapiens OX=9606 GN=CBR1 PE=1 SV=1;tr|A8MTM1|A8MTM1_HUMAN Carbonyl reductase [NADPH] 1 OS=Homo sapiens OX	Homo sapiens	3	5	5	30.3	30.375	277	0	144.62	2163500	0	70	0			478
A0A3B3ITP6;A0A3B3IU45;P33991;E5RG31;A0A3B3IS57;A0A3B3IT92;A0A3B3IRR8	DNA replication licensing factor MCM4	MCM4	MCM4	tr|A0A3B3ITP6|A0A3B3ITP6_HUMAN DNA helicase OS=Homo sapiens OX=9606 GN=MCM4 PE=1 SV=1;tr|A0A3B3IU45|A0A3B3IU45_HUMAN DNA helicase OS=Homo sapiens OX=9606 GN=MCM4 PE=1 SV=1;sp|P33991|MCM4_HUMAN DNA replication licensing factor MCM4 OS=Homo sapiens OX=9606 G	Homo sapiens	7	5	5	9.6	83.053	742	0	46.362	2143200	0	70	0			92
O60502;H7C3X0	Protein O-GlcNAcase	MGEA5	MGEA5	sp|O60502|OGA_HUMAN Protein O-GlcNAcase OS=Homo sapiens OX=9606 GN=OGA PE=1 SV=2;tr|H7C3X0|H7C3X0_HUMAN Protein O-GlcNAcase (Fragment) OS=Homo sapiens OX=9606 GN=OGA PE=1 SV=1	Homo sapiens	2	3	3	4.5	102.91	916	0	41.279	2127900	0	70	0			403
A0A2R8Y804;A0A2R8Y543;A0A2R8Y5C3;A0A2R8Y750;A0A2R8Y5Z1;B4DGU4;A0A2R8YCH5;A0A2R8Y7Z0;A0A2R8Y5A3;P35222;A0A2R8YG06;A0A2R8Y6G0;A0A2R8Y815	Catenin beta-1	CTNNB1	CTNNB1	tr|A0A2R8Y804|A0A2R8Y804_HUMAN Catenin beta-1 OS=Homo sapiens OX=9606 GN=CTNNB1 PE=1 SV=1;tr|A0A2R8Y543|A0A2R8Y543_HUMAN Catenin beta-1 OS=Homo sapiens OX=9606 GN=CTNNB1 PE=1 SV=1;tr|A0A2R8Y5C3|A0A2R8Y5C3_HUMAN Catenin beta-1 OS=Homo sapiens OX=9606 GN=CTN	Homo sapiens	13	4	4	6.3	77.206	702	0	131.08	2100200	0	70	0			77
O00203;F5GYB0;A0A590UJ44;A0A590UK69;F5GWU4;A0A590UJW5;A0A590UJ60;A0A5F9UJV3;A0A2R8Y2A8;A0A590UKC4;Q13367	AP-3 complex subunit beta-1	AP3B1	AP3B1	sp|O00203|AP3B1_HUMAN AP-3 complex subunit beta-1 OS=Homo sapiens OX=9606 GN=AP3B1 PE=1 SV=3	Homo sapiens	11	8	8	9	121.32	1094	0	72.104	2096300	0	70	0			372
A0A6Q8PHC0;A0A6Q8PHJ9;A0A6Q8PG15;A0A6Q8PFM5;A0A6Q8PFE1;O95831;A0A6Q8PFA7;A0A6Q8PFQ8;A0A6Q8PFS4;A0A6Q8PF87;E9PMA0;A0A6Q8PFW2;A0A6Q8PFN1;A0A6Q8PHJ4	Apoptosis-inducing factor 1, mitochondrial	AIFM1	AIFM1	tr|A0A6Q8PHC0|A0A6Q8PHC0_HUMAN Apoptosis-inducing factor 1, mitochondrial OS=Homo sapiens OX=9606 GN=AIFM1 PE=1 SV=1;tr|A0A6Q8PHJ9|A0A6Q8PHJ9_HUMAN Apoptosis-inducing factor 1, mitochondrial OS=Homo sapiens OX=9606 GN=AIFM1 PE=1 SV=1;tr|A0A6Q8PG15|A0A6Q8PG	Homo sapiens	14	7	7	19.2	66.514	609	0	87.062	2096100	0	70	0			114
Q16543;K7EQA9;K7EIU0;K7EL68;K7EKQ2	Hsp90 co-chaperone Cdc37;Hsp90 co-chaperone Cdc37, N-terminally processed	CDC37	CDC37	sp|Q16543|CDC37_HUMAN Hsp90 co-chaperone Cdc37 OS=Homo sapiens OX=9606 GN=CDC37 PE=1 SV=1;tr|K7EQA9|K7EQA9_HUMAN Hsp90 chaperone protein kinase-targeting subunit (Fragment) OS=Homo sapiens OX=9606 GN=CDC37 PE=1 SV=1	Homo sapiens	5	3	3	13.8	44.468	378	0	34.855	2093600	0	70	0			698
H3BRJ5;C9JNB9;H7C5P3;C9J9F0;C9IZE0;C9IZR2;C9JE08;C9J614;C9IY67;F5GZP3;Q8IWR1;Q9P2H3	Tripartite motif-containing protein 59;Intraflagellar transport protein 80 homolog	TRIM59;IFT80	TRIM59	tr|H3BRJ5|H3BRJ5_HUMAN Uncharacterized protein OS=Homo sapiens OX=9606 PE=4 SV=1;tr|C9JNB9|C9JNB9_HUMAN Tripartite motif-containing protein 59 (Fragment) OS=Homo sapiens OX=9606 GN=TRIM59 PE=4 SV=1;tr|H7C5P3|H7C5P3_HUMAN Intraflagellar transport protein 80	Homo sapiens	12	2	2	6	108.68	948	0	10.365	2085100	0	70	0			306
P28074;H0YJM8	Proteasome subunit beta type-5	PSMB5	PSMB5	sp|P28074|PSB5_HUMAN Proteasome subunit beta type-5 OS=Homo sapiens OX=9606 GN=PSMB5 PE=1 SV=3	Homo sapiens	2	9	9	36.1	28.48	263	0	94.92	2070500	0	70	0			519
Q3ZCQ8;M0R0C3;M0R2F8;M0R047;M0R003;M0QXC3;M0R2Z3;M0R303;M0R2D2;M0R1Y4	Mitochondrial import inner membrane translocase subunit TIM50	TIMM50	TIMM50	sp|Q3ZCQ8|TIM50_HUMAN Mitochondrial import inner membrane translocase subunit TIM50 OS=Homo sapiens OX=9606 GN=TIMM50 PE=1 SV=2;tr|M0R0C3|M0R0C3_HUMAN Mitochondrial import inner membrane translocase subunit TIM50 (Fragment) OS=Homo sapiens OX=9606 GN=TIMM5	Homo sapiens	10	5	5	20.1	39.646	353	0	133.98	2027700	0	70	0			704
A0A6Q8PGB0;P24928	DNA-directed RNA polymerase II subunit RPB1	POLR2A	POLR2A	tr|A0A6Q8PGB0|A0A6Q8PGB0_HUMAN DNA-directed RNA polymerase subunit OS=Homo sapiens OX=9606 GN=POLR2A PE=1 SV=1;sp|P24928|RPB1_HUMAN DNA-directed RNA polymerase II subunit RPB1 OS=Homo sapiens OX=9606 GN=POLR2A PE=1 SV=2	Homo sapiens	2	7	7	5.4	202.97	1836	0	159.66	2016400	0	70	0			117
A0A087WYT3;Q15185;B4DDC6	Prostaglandin E synthase 3	PTGES3	PTGES3	tr|A0A087WYT3|A0A087WYT3_HUMAN Prostaglandin E synthase 3 OS=Homo sapiens OX=9606 GN=PTGES3 PE=1 SV=1;sp|Q15185|TEBP_HUMAN Prostaglandin E synthase 3 OS=Homo sapiens OX=9606 GN=PTGES3 PE=1 SV=1	Homo sapiens	3	4	4	27.4	19.155	164	0	30.575	1933100	0	70	0			27
I3L3P7;P62244;I3L246;H3BN98;H3BV27;H3BT37;I3L303;H3BVC7	40S ribosomal protein S15a	RPS15A	RPS15A	tr|I3L3P7|I3L3P7_HUMAN 40S ribosomal protein S15a OS=Homo sapiens OX=9606 GN=RPS15A PE=1 SV=1;sp|P62244|RS15A_HUMAN 40S ribosomal protein S15a OS=Homo sapiens OX=9606 GN=RPS15A PE=1 SV=2;tr|I3L246|I3L246_HUMAN 40S ribosomal protein S15a OS=Homo sapiens OX=	Homo sapiens	8	6	6	53	11.477	100	0	37.886	1923400	0	70	0			317
P02747	Complement C1q subcomponent subunit C	C1QC	C1QC	sp|P02747|C1QC_HUMAN Complement C1q subcomponent subunit C OS=Homo sapiens OX=9606 GN=C1QC PE=1 SV=3	Homo sapiens	1	1	1	11	25.773	245	1	-2	1909700	0	70	0	+		423
Q9UN86	Ras GTPase-activating protein-binding protein 2	G3BP2	G3BP2	sp|Q9UN86|G3BP2_HUMAN Ras GTPase-activating protein-binding protein 2 OS=Homo sapiens OX=9606 GN=G3BP2 PE=1 SV=2	Homo sapiens	1	4	4	8.9	54.12	482	0	73.738	1906500	0	70	0			808
A0A2R8YDT5;A0A2R8Y7T2;A0A2R8Y5G6;A0A0D9SFB3;A0A2R8YF78;A0A2R8YCW1;A0A0D9SG12;A0A2R8YFR4;A0A2U3TZJ9;A0A2R8YFS5;A0A2R8Y4A4;A0A2R8Y645;A0A0D9SF53;O00571;F6S8Q4;A0A2R8YDH3;A0A0J9YVQ7;O15523;A0A087WVZ1;A0A2R8Y4D2;C9J8G5;C9J081	ATP-dependent RNA helicase DDX3X;ATP-dependent RNA helicase DDX3Y	DDX3X;DDX3Y	DDX3X	tr|A0A2R8YDT5|A0A2R8YDT5_HUMAN RNA helicase OS=Homo sapiens OX=9606 GN=DDX3X PE=1 SV=1;tr|A0A2R8Y7T2|A0A2R8Y7T2_HUMAN RNA helicase OS=Homo sapiens OX=9606 GN=DDX3X PE=1 SV=1;tr|A0A2R8Y5G6|A0A2R8Y5G6_HUMAN RNA helicase OS=Homo sapiens OX=9606 GN=DDX3X PE=1	Homo sapiens	22	8	7	20.6	52.797	475	0	98.057	1892800	0	70	0			54
P0DP25;P0DP24;P0DP23;E7EMB3;M0QZ52;Q96HY3;F8WBR5;G3V479;G3V361;A0A590UJI2;A0A590UJC0;G3V226		CALM2;CALM3	CALM2	sp|P0DP25|CALM3_HUMAN Calmodulin-3 OS=Homo sapiens OX=9606 GN=CALM3 PE=1 SV=1;sp|P0DP24|CALM2_HUMAN Calmodulin-2 OS=Homo sapiens OX=9606 GN=CALM2 PE=1 SV=1;sp|P0DP23|CALM1_HUMAN Calmodulin-1 OS=Homo sapiens OX=9606 GN=CALM1 PE=1 SV=1;tr|E7EMB3|E7EMB3_HUMAN	Homo sapiens	12	7	7	79.2	16.837	149	0	84.35	1879800	0	70	0			449
Q00577	Transcriptional activator protein Pur-alpha	PURA	PURA	sp|Q00577|PURA_HUMAN Transcriptional activator protein Pur-alpha OS=Homo sapiens OX=9606 GN=PURA PE=1 SV=2	Homo sapiens	1	2	2	15.2	34.91	322	0	28.041	1854800	0	70	0			635
Q99733;E9PNW0;E9PJJ2;E9PS34;E9PNJ7;C9J6D1;E9PKI2;E9PP22;A8MXH2;E9PKT8;C9JZI7;C9J1B1;H0YCI4	Nucleosome assembly protein 1-like 4	NAP1L4	NAP1L4	sp|Q99733|NP1L4_HUMAN Nucleosome assembly protein 1-like 4 OS=Homo sapiens OX=9606 GN=NAP1L4 PE=1 SV=1;tr|E9PNW0|E9PNW0_HUMAN Nucleosome assembly protein 1-like 4 (Fragment) OS=Homo sapiens OX=9606 GN=NAP1L4 PE=1 SV=1;tr|E9PJJ2|E9PJJ2_HUMAN Nucleosome asse	Homo sapiens	13	5	4	18.1	42.823	375	0	46.272	1834100	0	70	0			767
C9JG97;C9JEH3;Q13685;H7C0R2;C9JTS3	Angio-associated migratory cell protein	AAMP	AAMP	tr|C9JG97|C9JG97_HUMAN Angio-associated migratory cell protein OS=Homo sapiens OX=9606 GN=AAMP PE=1 SV=1;tr|C9JEH3|C9JEH3_HUMAN Angio-associated migratory cell protein OS=Homo sapiens OX=9606 GN=AAMP PE=1 SV=1;sp|Q13685|AAMP_HUMAN Angio-associated migrator	Homo sapiens	5	2	2	5.8	44.693	415	0	28.535	1829700	0	70	0			172
Q5EBL4;A0A1B0GVV3	RILP-like protein 1	RILPL1	RILPL1	sp|Q5EBL4|RIPL1_HUMAN RILP-like protein 1 OS=Homo sapiens OX=9606 GN=RILPL1 PE=1 SV=1;tr|A0A1B0GVV3|A0A1B0GVV3_HUMAN RILP-like protein 1 OS=Homo sapiens OX=9606 GN=RILPL1 PE=1 SV=1	Homo sapiens	2	5	5	14.4	47.107	403	0	58.755	1824300	0	70	0			708
P54886	Delta-1-pyrroline-5-carboxylate synthase;Glutamate 5-kinase;Gamma-glutamyl phosphate reductase	ALDH18A1	ALDH18A1	sp|P54886|P5CS_HUMAN Delta-1-pyrroline-5-carboxylate synthase OS=Homo sapiens OX=9606 GN=ALDH18A1 PE=1 SV=2	Homo sapiens	1	4	4	6.5	87.301	795	0	78.081	1796400	0	70	0			580
A0A2R8YDW2;A0A2R8Y4X2;A0A2R8YD40;A0A2R8YDJ9;A0A2R8YER1;A0A2R8Y8C1;A0A2R8Y445;A0A2R8Y425;A0A2R8Y5J0;A0A2R8YFK9;A0A2U3TZM0;A0A2R8YFD8;F5GWX5;A0A2R8Y212;A0A2R8Y521;A0A0C4DGG9;Q14839;A0A2R8Y685;A0A2R8Y5Z7;K7EMY3;A0A2R8Y8B3;Q8TDI0;F2Z2R5;F6T542;A0A2R8YE38;A0A2R8Y5M9;A0A2R8Y7M9;A0A2R8Y7I0	Chromodomain-helicase-DNA-binding protein 4;Chromodomain-helicase-DNA-binding protein 5	CHD4;CHD5	CHD4	tr|A0A2R8YDW2|A0A2R8YDW2_HUMAN Chromodomain-helicase-DNA-binding protein 4 (Fragment) OS=Homo sapiens OX=9606 GN=CHD4 PE=1 SV=1;tr|A0A2R8Y4X2|A0A2R8Y4X2_HUMAN Chromodomain-helicase-DNA-binding protein 4 (Fragment) OS=Homo sapiens OX=9606 GN=CHD4 PE=1 SV=1;	Homo sapiens	28	5	4	5.1	138.39	1215	0	106.45	1789200	0	70	0			50
P31689	DnaJ homolog subfamily A member 1	DNAJA1	DNAJA1	sp|P31689|DNJA1_HUMAN DnaJ homolog subfamily A member 1 OS=Homo sapiens OX=9606 GN=DNAJA1 PE=1 SV=2	Homo sapiens	1	2	2	9.6	44.868	397	0	65.142	1783700	0	70	0			526
H7C2X0;C9JRD9;A0A3B3IT53;A0A3B3ISS1;A0A3B3IS56;A0A3B3IRP4;A0A3B3ITQ2;A0A3B3IUF2;A0A3B3ISM8;A0A3B3ISX3;A0A3B3IUB1;Q13144	Translation initiation factor eIF-2B subunit epsilon	EIF2B5	EIF2B5	tr|H7C2X0|H7C2X0_HUMAN Translation initiation factor eIF-2B subunit epsilon (Fragment) OS=Homo sapiens OX=9606 GN=EIF2B5 PE=1 SV=1;tr|C9JRD9|C9JRD9_HUMAN Translation initiation factor eIF-2B subunit epsilon OS=Homo sapiens OX=9606 GN=EIF2B5 PE=1 SV=1;tr|A0	Homo sapiens	12	1	1	22.8	9.3355	92	0	6.8467	1739100	0	70	0			88
Q14566	DNA replication licensing factor MCM6	MCM6	MCM6	sp|Q14566|MCM6_HUMAN DNA replication licensing factor MCM6 OS=Homo sapiens OX=9606 GN=MCM6 PE=1 SV=1	Homo sapiens	1	7	7	10.6	92.888	821	0	53.166	1711100	0	70	0			680
B5MBZ0;Q9HC35	Echinoderm microtubule-associated protein-like 4	EML4	EML4	tr|B5MBZ0|B5MBZ0_HUMAN Echinoderm microtubule-associated protein-like 4 OS=Homo sapiens OX=9606 GN=EML4 PE=1 SV=3;sp|Q9HC35|EMAL4_HUMAN Echinoderm microtubule-associated protein-like 4 OS=Homo sapiens OX=9606 GN=EML4 PE=1 SV=3	Homo sapiens	2	4	4	5	110.18	992	0	46.768	1701700	0	70	0			151
P35998;C9JLS9	26S protease regulatory subunit 7	PSMC2	PSMC2	sp|P35998|PRS7_HUMAN 26S proteasome regulatory subunit 7 OS=Homo sapiens OX=9606 GN=PSMC2 PE=1 SV=3	Homo sapiens	2	9	9	28.9	48.633	433	0	74.119	1692300	0	70	0			538
E9PD53;Q9NTJ3;C9JR83	Structural maintenance of chromosomes protein;Structural maintenance of chromosomes protein 4	SMC4	SMC4	tr|E9PD53|E9PD53_HUMAN Structural maintenance of chromosomes protein OS=Homo sapiens OX=9606 GN=SMC4 PE=1 SV=1;sp|Q9NTJ3|SMC4_HUMAN Structural maintenance of chromosomes protein 4 OS=Homo sapiens OX=9606 GN=SMC4 PE=1 SV=2	Homo sapiens	3	5	5	4.4	144.45	1263	0	62.178	1685200	0	70	0			234
P52907	F-actin-capping protein subunit alpha-1	CAPZA1	CAPZA1	sp|P52907|CAZA1_HUMAN F-actin-capping protein subunit alpha-1 OS=Homo sapiens OX=9606 GN=CAPZA1 PE=1 SV=3	Homo sapiens	1	3	3	16.4	32.922	286	0	23.177	1682800	0	70	0			574
P20618	Proteasome subunit beta type-1	PSMB1	PSMB1	sp|P20618|PSB1_HUMAN Proteasome subunit beta type-1 OS=Homo sapiens OX=9606 GN=PSMB1 PE=1 SV=2	Homo sapiens	1	5	5	27.8	26.489	241	0	38.891	1681800	0	70	0			490
A0A0A0MSX9;P41252;J3KR24	Isoleucine--tRNA ligase, cytoplasmic	IARS	IARS	tr|A0A0A0MSX9|A0A0A0MSX9_HUMAN Isoleucyl-tRNA synthetase OS=Homo sapiens OX=9606 GN=IARS1 PE=1 SV=1;sp|P41252|SYIC_HUMAN Isoleucine--tRNA ligase, cytoplasmic OS=Homo sapiens OX=9606 GN=IARS1 PE=1 SV=2;tr|J3KR24|J3KR24_HUMAN Isoleucyl-tRNA synthetase OS=Hom	Homo sapiens	3	6	6	6.6	142.29	1242	0	81.152	1652500	0	70	0			42
A0A2R8Y6G6;P06733;A0A2R8Y798;K7ERS8;A0A2R8YEG5;A0A2R8Y879;A0A2R8YEM5;K7EM90;F5H1C3;E5RI09;E5RG95;K7EPM1;K7EKN2;E5RGZ4;F5H0C8;P13929;P09104	Alpha-enolase	ENO1	ENO1	tr|A0A2R8Y6G6|A0A2R8Y6G6_HUMAN 2-phospho-D-glycerate hydro-lyase OS=Homo sapiens OX=9606 GN=ENO1 PE=1 SV=1;sp|P06733|ENOA_HUMAN Alpha-enolase OS=Homo sapiens OX=9606 GN=ENO1 PE=1 SV=2	Homo sapiens	17	5	5	15.9	47.327	434	0	63.985	1641500	0	70	0			79
P60866;E5RIP1;E5RJX2;G3XAN0	40S ribosomal protein S20	RPS20	RPS20	sp|P60866|RS20_HUMAN 40S ribosomal protein S20 OS=Homo sapiens OX=9606 GN=RPS20 PE=1 SV=1;tr|E5RIP1|E5RIP1_HUMAN 40S ribosomal protein S20 OS=Homo sapiens OX=9606 GN=RPS20 PE=1 SV=1;tr|E5RJX2|E5RJX2_HUMAN 40S ribosomal protein S20 OS=Homo sapiens OX=9606 G	Homo sapiens	4	3	3	25.2	13.373	119	0	24.463	1604300	0	70	0			593
P12004	Proliferating cell nuclear antigen	PCNA	PCNA	sp|P12004|PCNA_HUMAN Proliferating cell nuclear antigen OS=Homo sapiens OX=9606 GN=PCNA PE=1 SV=1	Homo sapiens	1	5	5	30.3	28.768	261	0	189.72	1598500	0	70	0			457
A0A087X2D8;O60271;D6RHI8;E9PFH7;A0A087WYG2;A0A669KB35;Q9UPT6	C-Jun-amino-terminal kinase-interacting protein 4	SPAG9	SPAG9	tr|A0A087X2D8|A0A087X2D8_HUMAN C-Jun-amino-terminal kinase-interacting protein 4 OS=Homo sapiens OX=9606 GN=SPAG9 PE=1 SV=1;sp|O60271|JIP4_HUMAN C-Jun-amino-terminal kinase-interacting protein 4 OS=Homo sapiens OX=9606 GN=SPAG9 PE=1 SV=4	Homo sapiens	7	4	4	5.6	145.17	1312	0	69.14	1553600	0	70	0			32
Q9C0C9;K7EQ12;K7ES11	E2/E3 hybrid ubiquitin-protein ligase UBE2O	UBE2O	UBE2O	sp|Q9C0C9|UBE2O_HUMAN (E3-independent) E2 ubiquitin-conjugating enzyme OS=Homo sapiens OX=9606 GN=UBE2O PE=1 SV=3;tr|K7EQ12|K7EQ12_HUMAN (E3-independent) E2 ubiquitin-conjugating enzyme (Fragment) OS=Homo sapiens OX=9606 GN=UBE2O PE=1 SV=1	Homo sapiens	3	5	5	5.3	141.29	1292	0	43.093	1534100	0	70	0			779
Q5T5C7;P49591	Serine--tRNA ligase, cytoplasmic	SARS	SARS	tr|Q5T5C7|Q5T5C7_HUMAN Seryl-tRNA synthetase OS=Homo sapiens OX=9606 GN=SARS1 PE=1 SV=1;sp|P49591|SYSC_HUMAN Serine--tRNA ligase, cytoplasmic OS=Homo sapiens OX=9606 GN=SARS1 PE=1 SV=3	Homo sapiens	2	5	5	11.2	61.312	536	0	52.403	1494300	0	70	0			563
Q08J23	tRNA (cytosine(34)-C(5))-methyltransferase	NSUN2	NSUN2	sp|Q08J23|NSUN2_HUMAN RNA cytosine C(5)-methyltransferase NSUN2 OS=Homo sapiens OX=9606 GN=NSUN2 PE=1 SV=2	Homo sapiens	1	2	2	3.8	86.47	767	0	62.694	1490200	0	70	0			649
Q96QK1	Vacuolar protein sorting-associated protein 35	VPS35	VPS35	sp|Q96QK1|VPS35_HUMAN Vacuolar protein sorting-associated protein 35 OS=Homo sapiens OX=9606 GN=VPS35 PE=1 SV=2	Homo sapiens	1	5	5	8.9	91.706	796	0	49.358	1476600	0	70	0			763
M0QXB4;O14579;M0R061	Coatomer subunit epsilon	COPE	COPE	tr|M0QXB4|M0QXB4_HUMAN Coatomer subunit epsilon OS=Homo sapiens OX=9606 GN=COPE PE=1 SV=1;sp|O14579|COPE_HUMAN Coatomer subunit epsilon OS=Homo sapiens OX=9606 GN=COPE PE=1 SV=3;tr|M0R061|M0R061_HUMAN Coatomer subunit epsilon OS=Homo sapiens OX=9606 GN=COP	Homo sapiens	3	4	4	15.7	36.923	331	0	46.778	1469200	0	70	0			361
P31947	14-3-3 protein sigma	SFN	SFN	sp|P31947|1433S_HUMAN 14-3-3 protein sigma OS=Homo sapiens OX=9606 GN=SFN PE=1 SV=1	Homo sapiens	1	4	2	13.3	27.774	248	0	20.262	1442600	0	70	0			531
J3KNQ3;Q9UNM6;A0A087WUL9;H0YD73;E9PL38	26S proteasome non-ATPase regulatory subunit 13	PSMD13	PSMD13	tr|J3KNQ3|J3KNQ3_HUMAN 26S proteasome non-ATPase regulatory subunit 13 OS=Homo sapiens OX=9606 GN=PSMD13 PE=1 SV=1;sp|Q9UNM6|PSD13_HUMAN 26S proteasome non-ATPase regulatory subunit 13 OS=Homo sapiens OX=9606 GN=PSMD13 PE=1 SV=2;tr|A0A087WUL9|A0A087WUL9_HU	Homo sapiens	5	5	5	13.2	39.829	349	0	28.438	1430900	0	70	0			322
D6RB01;Q9Y6X4;D6RC41;D6R953	Soluble lamin-associated protein of 75 kDa	FAM169A	FAM169A	tr|D6RB01|D6RB01_HUMAN Soluble lamin-associated protein of 75 kDa OS=Homo sapiens OX=9606 GN=FAM169A PE=1 SV=1;sp|Q9Y6X4|F169A_HUMAN Soluble lamin-associated protein of 75 kDa OS=Homo sapiens OX=9606 GN=FAM169A PE=1 SV=2;tr|D6RC41|D6RC41_HUMAN Soluble lami	Homo sapiens	4	2	2	3	68.054	610	0	13.351	1428700	0	70	0			210
P46940;H0YLE8;A0A0J9YXZ5	Ras GTPase-activating-like protein IQGAP1	IQGAP1	IQGAP1	sp|P46940|IQGA1_HUMAN Ras GTPase-activating-like protein IQGAP1 OS=Homo sapiens OX=9606 GN=IQGAP1 PE=1 SV=1;tr|H0YLE8|H0YLE8_HUMAN Ras GTPase-activating-like protein IQGAP1 OS=Homo sapiens OX=9606 GN=IQGAP1 PE=1 SV=1;tr|A0A0J9YXZ5|A0A0J9YXZ5_HUMAN Ras GTPa	Homo sapiens	3	4	4	4.9	189.25	1657	0	136.56	1420800	0	70	0			556
P17655	Calpain-2 catalytic subunit	CAPN2	CAPN2	sp|P17655|CAN2_HUMAN Calpain-2 catalytic subunit OS=Homo sapiens OX=9606 GN=CAPN2 PE=1 SV=6	Homo sapiens	1	2	2	3.7	79.994	700	0	12.67	1397200	0	70	0			480
M0R210;P62249;M0R3H0;Q6IPX4;M0QX76;M0R1M5	40S ribosomal protein S16	RPS16	RPS16	tr|M0R210|M0R210_HUMAN 40S ribosomal protein S16 OS=Homo sapiens OX=9606 GN=RPS16 PE=1 SV=1;sp|P62249|RS16_HUMAN 40S ribosomal protein S16 OS=Homo sapiens OX=9606 GN=RPS16 PE=1 SV=2;tr|M0R3H0|M0R3H0_HUMAN 40S ribosomal protein S16 OS=Homo sapiens OX=9606 G	Homo sapiens	6	3	3	24.8	14.419	129	0	22.034	1383800	0	70	0			369
P07737;K7EJ44;I3L3D5	Profilin-1	PFN1	PFN1	sp|P07737|PROF1_HUMAN Profilin-1 OS=Homo sapiens OX=9606 GN=PFN1 PE=1 SV=2;tr|K7EJ44|K7EJ44_HUMAN Profilin OS=Homo sapiens OX=9606 GN=PFN1 PE=1 SV=1;tr|I3L3D5|I3L3D5_HUMAN Profilin (Fragment) OS=Homo sapiens OX=9606 GN=PFN1 PE=1 SV=1	Homo sapiens	3	5	5	42.9	15.054	140	0	46.551	1382100	0	70	0			440
Q9UMS4	Pre-mRNA-processing factor 19	PRPF19	PRPF19	sp|Q9UMS4|PRP19_HUMAN Pre-mRNA-processing factor 19 OS=Homo sapiens OX=9606 GN=PRPF19 PE=1 SV=1	Homo sapiens	1	4	4	15.9	55.18	504	0	68.304	1373500	0	70	0			807
O00154;K7EKP8	Cytosolic acyl coenzyme A thioester hydrolase	ACOT7	ACOT7	sp|O00154|BACH_HUMAN Cytosolic acyl coenzyme A thioester hydrolase OS=Homo sapiens OX=9606 GN=ACOT7 PE=1 SV=3;tr|K7EKP8|K7EKP8_HUMAN Cytosolic acyl coenzyme A thioester hydrolase (Fragment) OS=Homo sapiens OX=9606 GN=ACOT7 PE=1 SV=8	Homo sapiens	2	4	4	16.3	41.796	380	0	89.313	1368700	0	70	0			371
P63272;J3KSQ6;D3DTZ5;J3QSB9	Transcription elongation factor SPT4	SUPT4H1	SUPT4H1	sp|P63272|SPT4H_HUMAN Transcription elongation factor SPT4 OS=Homo sapiens OX=9606 GN=SUPT4H1 PE=1 SV=1;tr|J3KSQ6|J3KSQ6_HUMAN Transcription elongation factor SPT4 OS=Homo sapiens OX=9606 GN=SUPT4H1 PE=1 SV=1;tr|D3DTZ5|D3DTZ5_HUMAN Suppressor of Ty 4 homol	Homo sapiens	4	4	4	35.9	13.193	117	0	23.209	1363600	0	70	0			623
B2WTI3;B2WTI4;K7EJU9;Q6NYC1	Bifunctional arginine demethylase and lysyl-hydroxylase JMJD6	JMJD6	JMJD6	tr|B2WTI3|B2WTI3_HUMAN Bifunctional arginine demethylase and lysyl-hydroxylase JMJD6 OS=Homo sapiens OX=9606 GN=JMJD6 PE=1 SV=1;tr|B2WTI4|B2WTI4_HUMAN Bifunctional arginine demethylase and lysyl-hydroxylase JMJD6 OS=Homo sapiens OX=9606 GN=JMJD6 PE=1 SV=1;	Homo sapiens	4	3	3	14	39.241	335	0	83.461	1326300	0	70	0			140
B1AUU8;P42566;S4R3U1	Epidermal growth factor receptor substrate 15	EPS15	EPS15	tr|B1AUU8|B1AUU8_HUMAN Epidermal growth factor receptor substrate 15 OS=Homo sapiens OX=9606 GN=EPS15 PE=1 SV=1;sp|P42566|EPS15_HUMAN Epidermal growth factor receptor substrate 15 OS=Homo sapiens OX=9606 GN=EPS15 PE=1 SV=2	Homo sapiens	3	4	4	10.5	83.653	762	0	46.973	1324700	0	70	0			138
D6RED7;D6RAS7;H0Y8L7;D6RB09;E9PFI5;D6RG13;D6RAT0;P61247;D6RGE0;D6RI02;D6R9B6;H0Y9Y4	40S ribosomal protein S3a	RPS3A	RPS3A	tr|D6RED7|D6RED7_HUMAN 40S ribosomal protein S3a (Fragment) OS=Homo sapiens OX=9606 GN=RPS3A PE=1 SV=1;tr|D6RAS7|D6RAS7_HUMAN 40S ribosomal protein S3a (Fragment) OS=Homo sapiens OX=9606 GN=RPS3A PE=1 SV=1;tr|H0Y8L7|H0Y8L7_HUMAN 40S ribosomal protein S3a (	Homo sapiens	12	3	3	25.7	11.572	101	0	43.242	1324200	0	70	0			208
Q92783	Signal transducing adapter molecule 1	STAM	STAM	sp|Q92783|STAM1_HUMAN Signal transducing adapter molecule 1 OS=Homo sapiens OX=9606 GN=STAM PE=1 SV=3	Homo sapiens	1	1	1	4.3	59.179	540	1	-2	1318300	0	70	0	+		750
P40429;M0QZU1;A0A096LPE0;M0QYS1	60S ribosomal protein L13a	RPL13A	RPL13A	sp|P40429|RL13A_HUMAN 60S ribosomal protein L13a OS=Homo sapiens OX=9606 GN=RPL13A PE=1 SV=2;tr|M0QZU1|M0QZU1_HUMAN 60S ribosomal protein L13a OS=Homo sapiens OX=9606 GN=RPL13A PE=1 SV=1;tr|A0A096LPE0|A0A096LPE0_HUMAN 60S ribosomal protein L13a OS=Homo sap	Homo sapiens	4	2	2	11.3	23.577	203	0	20.41	1314000	0	70	0			544
Q12765;C9K052;B8ZZP4;C9J7U9	Secernin-1	SCRN1	SCRN1	sp|Q12765|SCRN1_HUMAN Secernin-1 OS=Homo sapiens OX=9606 GN=SCRN1 PE=1 SV=2;tr|C9K052|C9K052_HUMAN Secernin-1 (Fragment) OS=Homo sapiens OX=9606 GN=SCRN1 PE=1 SV=1;tr|B8ZZP4|B8ZZP4_HUMAN Secernin-1 OS=Homo sapiens OX=9606 GN=SCRN1 PE=1 SV=1;tr|C9J7U9|C9J7U	Homo sapiens	4	6	6	20.3	46.382	414	0	68.729	1308800	0	70	0			655
P14174	Macrophage migration inhibitory factor	MIF	MIF	sp|P14174|MIF_HUMAN Macrophage migration inhibitory factor OS=Homo sapiens OX=9606 GN=MIF PE=1 SV=4	Homo sapiens	1	2	2	17.4	12.476	115	0	13.63	1302400	0	70	0			471
E9PJD9;E9PLL6;E9PLX7;P46776	60S ribosomal protein L27a	RPL27A	RPL27A	tr|E9PJD9|E9PJD9_HUMAN 60S ribosomal protein L27a OS=Homo sapiens OX=9606 GN=RPL27A PE=1 SV=1;tr|E9PLL6|E9PLL6_HUMAN 60S ribosomal protein L27a OS=Homo sapiens OX=9606 GN=RPL27A PE=1 SV=1;tr|E9PLX7|E9PLX7_HUMAN 60S ribosomal protein L27a OS=Homo sapiens OX	Homo sapiens	4	1	1	12.1	10.127	91	0.002849	6.4044	1283900	0	70	0			241
A0A0A0MRN5;Q9NZT2;A0A087X028	Opioid growth factor receptor	OGFR	OGFR	tr|A0A0A0MRN5|A0A0A0MRN5_HUMAN Opioid growth factor receptor OS=Homo sapiens OX=9606 GN=OGFR PE=1 SV=1;sp|Q9NZT2|OGFR_HUMAN Opioid growth factor receptor OS=Homo sapiens OX=9606 GN=OGFR PE=1 SV=3;tr|A0A087X028|A0A087X028_HUMAN Opioid growth factor receptor	Homo sapiens	3	4	4	9.1	67.194	625	0	31.717	1276700	0	70	0			37
D6RAN4;P32969;A0A2R8Y5Y7;H0Y9R4;H0Y9V9	60S ribosomal protein L9	RPL9	RPL9	tr|D6RAN4|D6RAN4_HUMAN 60S ribosomal protein L9 (Fragment) OS=Homo sapiens OX=9606 GN=RPL9 PE=1 SV=8;sp|P32969|RL9_HUMAN 60S ribosomal protein L9 OS=Homo sapiens OX=9606 GN=RPL9 PE=1 SV=1;tr|A0A2R8Y5Y7|A0A2R8Y5Y7_HUMAN 60S ribosomal protein L9 OS=Homo sapi	Homo sapiens	5	4	4	26	20.775	181	0	28.88	1270700	0	70	0			207
P63010;A0A087WU93;A0A087WZQ6;A0A087X253;A0A087WYD1	AP-2 complex subunit beta	AP2B1	AP2B1	sp|P63010|AP2B1_HUMAN AP-2 complex subunit beta OS=Homo sapiens OX=9606 GN=AP2B1 PE=1 SV=1;tr|A0A087WU93|A0A087WU93_HUMAN AP-2 complex subunit beta (Fragment) OS=Homo sapiens OX=9606 GN=AP2B1 PE=1 SV=1;tr|A0A087WZQ6|A0A087WZQ6_HUMAN AP-2 complex subunit be	Homo sapiens	5	5	3	8.3	104.55	937	0	45.577	1244900	0	70	0			619
P33176;A0A0G2JMZ6;J3KNA1;A0A6Q8PEZ8;A0A6Q8PGJ3;O60282;Q12840	Kinesin-1 heavy chain	KIF5B	KIF5B	sp|P33176|KINH_HUMAN Kinesin-1 heavy chain OS=Homo sapiens OX=9606 GN=KIF5B PE=1 SV=1	Homo sapiens	7	5	5	6.5	109.68	963	0	115.61	1236300	0	70	0			533
P49366;A0A087WZK0;M0R253;M0QX43;A0A3B3IU31;B4E3M2;M0R0V2;Q5J8M5;M0R0J4;M0QYZ7;M0R264	Deoxyhypusine synthase	DHPS	DHPS	sp|P49366|DHYS_HUMAN Deoxyhypusine synthase OS=Homo sapiens OX=9606 GN=DHPS PE=1 SV=1;tr|A0A087WZK0|A0A087WZK0_HUMAN Deoxyhypusine synthase OS=Homo sapiens OX=9606 GN=DHPS PE=1 SV=1;tr|M0R253|M0R253_HUMAN Deoxyhypusine synthase OS=Homo sapiens OX=9606 GN=D	Homo sapiens	11	4	4	14.6	40.97	369	0	63.823	1229300	0	70	0			559
P53004	Biliverdin reductase A	BLVRA	BLVRA	sp|P53004|BIEA_HUMAN Biliverdin reductase A OS=Homo sapiens OX=9606 GN=BLVRA PE=1 SV=2	Homo sapiens	1	4	4	15.9	33.428	296	0	73.936	1228900	0	70	0			575
P68133;P68032;P63267;P62736;A6NL76;F8WB63;B8ZZJ2;C9JFL5;F6UVQ4;F6QUT6	Actin, alpha skeletal muscle;Actin, alpha cardiac muscle 1;Actin, gamma-enteric smooth muscle;Actin, aortic smooth muscle	ACTA1;ACTC1;ACTG2;ACTA2	ACTA1	sp|P68133|ACTS_HUMAN Actin, alpha skeletal muscle OS=Homo sapiens OX=9606 GN=ACTA1 PE=1 SV=1;sp|P68032|ACTC_HUMAN Actin, alpha cardiac muscle 1 OS=Homo sapiens OX=9606 GN=ACTC1 PE=1 SV=1;sp|P63267|ACTH_HUMAN Actin, gamma-enteric smooth muscle OS=Homo sapie	Homo sapiens	10	10	1	26.5	42.051	377	0.0040541	6.1512	1209500	0	70	0			627
P30050	60S ribosomal protein L12	RPL12	RPL12	sp|P30050|RL12_HUMAN 60S ribosomal protein L12 OS=Homo sapiens OX=9606 GN=RPL12 PE=1 SV=1	Homo sapiens	1	5	5	44.8	17.818	165	0	37.485	1208900	0	70	0			522
Q49AR2	UPF0489 protein C5orf22	C5orf22	C5orf22	sp|Q49AR2|CE022_HUMAN UPF0489 protein C5orf22 OS=Homo sapiens OX=9606 GN=C5orf22 PE=1 SV=2	Homo sapiens	1	3	3	8.8	49.967	442	0	20.836	1207800	0	70	0			705
A0A0U1RR22;Q9UNF0;B0QYG7;B0QYG8	Protein kinase C and casein kinase substrate in neurons protein 2	PACSIN2	PACSIN2	tr|A0A0U1RR22|A0A0U1RR22_HUMAN Protein kinase C and casein kinase substrate in neurons protein 2 (Fragment) OS=Homo sapiens OX=9606 GN=PACSIN2 PE=1 SV=1;sp|Q9UNF0|PACN2_HUMAN Protein kinase C and casein kinase substrate in neurons protein 2 OS=Homo sapiens	Homo sapiens	4	4	4	8.9	51.828	451	0	28.262	1207400	0	70	0			61
O00487;C9JW37	26S proteasome non-ATPase regulatory subunit 14	PSMD14	PSMD14	sp|O00487|PSDE_HUMAN 26S proteasome non-ATPase regulatory subunit 14 OS=Homo sapiens OX=9606 GN=PSMD14 PE=1 SV=1;tr|C9JW37|C9JW37_HUMAN 26S proteasome regulatory subunit RPN11 (Fragment) OS=Homo sapiens OX=9606 GN=PSMD14 PE=1 SV=1	Homo sapiens	2	2	2	15.2	34.577	310	0	30.05	1161000	0	70	0			380
O60884	DnaJ homolog subfamily A member 2	DNAJA2	DNAJA2	sp|O60884|DNJA2_HUMAN DnaJ homolog subfamily A member 2 OS=Homo sapiens OX=9606 GN=DNAJA2 PE=1 SV=1	Homo sapiens	1	2	2	9.7	45.745	412	0	49.207	1141800	0	70	0			406
A0A024RBT2;Q9NR28;H7BZQ7;H7BZK7;A0A2U3TZH2	Diablo homolog, mitochondrial	DIABLO	DIABLO	tr|A0A024RBT2|A0A024RBT2_HUMAN Diablo homolog, mitochondrial OS=Homo sapiens OX=9606 GN=DIABLO PE=1 SV=1;sp|Q9NR28|DBLOH_HUMAN Diablo homolog, mitochondrial OS=Homo sapiens OX=9606 GN=DIABLO PE=1 SV=1	Homo sapiens	5	5	5	24.1	18.919	166	0	35.593	1135400	0	70	0			3
Q9BZQ8	Protein Niban	FAM129A	FAM129A	sp|Q9BZQ8|NIBA1_HUMAN Protein Niban 1 OS=Homo sapiens OX=9606 GN=NIBAN1 PE=1 SV=1	Homo sapiens	1	6	6	6.7	103.13	928	0	166.2	1126900	0	70	0			778
Q13907;C9JD53	Isopentenyl-diphosphate Delta-isomerase 1	IDI1	IDI1	sp|Q13907|IDI1_HUMAN Isopentenyl-diphosphate Delta-isomerase 1 OS=Homo sapiens OX=9606 GN=IDI1 PE=1 SV=2	Homo sapiens	2	3	3	19.4	26.319	227	0	100.56	1115800	0	70	0			672
Q13283;E5RIZ6	Ras GTPase-activating protein-binding protein 1	G3BP1	G3BP1	sp|Q13283|G3BP1_HUMAN Ras GTPase-activating protein-binding protein 1 OS=Homo sapiens OX=9606 GN=G3BP1 PE=1 SV=1	Homo sapiens	2	3	3	10.9	52.164	466	0	99.495	1111100	0	70	0			665
Q9BUF5;K7ESM5;K7EL29;K7ESQ3;K7EQT3;K7EJ64;K7ERA8;K7EJZ4;K7ES63;K7EN98;K7EPE5;K7EK43	Tubulin beta-6 chain	TUBB6	TUBB6	sp|Q9BUF5|TBB6_HUMAN Tubulin beta-6 chain OS=Homo sapiens OX=9606 GN=TUBB6 PE=1 SV=1;tr|K7ESM5|K7ESM5_HUMAN Tubulin beta chain (Fragment) OS=Homo sapiens OX=9606 GN=TUBB6 PE=1 SV=1	Homo sapiens	12	13	3	36.5	49.857	446	0	26.496	1088900	0	70	0			774
D6RJA0;Q8WTS6	Histone-lysine N-methyltransferase SETD7	SETD7	SETD7	tr|D6RJA0|D6RJA0_HUMAN [Histone H3]-lysine(4) N-methyltransferase OS=Homo sapiens OX=9606 GN=SETD7 PE=1 SV=1;sp|Q8WTS6|SETD7_HUMAN Histone-lysine N-methyltransferase SETD7 OS=Homo sapiens OX=9606 GN=SETD7 PE=1 SV=1	Homo sapiens	2	3	3	10.2	40.127	362	0	61.837	1073700	0	70	0			212
P35219	Carbonic anhydrase-related protein	CA8	CA8	sp|P35219|CAH8_HUMAN Carbonic anhydrase-related protein OS=Homo sapiens OX=9606 GN=CA8 PE=1 SV=3	Homo sapiens	1	4	4	22.8	32.973	290	0	60.235	1073300	0	70	0			535
Q9Y3F4;H0YH33	Serine-threonine kinase receptor-associated protein	STRAP	STRAP	sp|Q9Y3F4|STRAP_HUMAN Serine-threonine kinase receptor-associated protein OS=Homo sapiens OX=9606 GN=STRAP PE=1 SV=1;tr|H0YH33|H0YH33_HUMAN Serine-threonine kinase receptor-associated protein (Fragment) OS=Homo sapiens OX=9606 GN=STRAP PE=1 SV=1	Homo sapiens	2	3	3	14	38.438	350	0	260.7	1061900	0	70	0			822
P08559;Q5JPU0;Q5JPT9;Q5JPU1;Q5JPU3;Q5JPU2;P29803	Pyruvate dehydrogenase E1 component subunit alpha, somatic form, mitochondrial	PDHA1	PDHA1	sp|P08559|ODPA_HUMAN Pyruvate dehydrogenase E1 component subunit alpha, somatic form, mitochondrial OS=Homo sapiens OX=9606 GN=PDHA1 PE=1 SV=3;tr|Q5JPU0|Q5JPU0_HUMAN Pyruvate dehydrogenase E1 component subunit alpha, somatic form, mitochondrial OS=Homo sap	Homo sapiens	7	3	3	7.9	43.295	390	0	17.883	1056700	0	70	0			444
C9JRH2;C9J3R0;C9JMJ4;C9JQZ4;C9JW69;P18754	Regulator of chromosome condensation	RCC1	RCC1	tr|C9JRH2|C9JRH2_HUMAN Regulator of chromosome condensation (Fragment) OS=Homo sapiens OX=9606 GN=RCC1 PE=1 SV=1;tr|C9J3R0|C9J3R0_HUMAN Regulator of chromosome condensation (Fragment) OS=Homo sapiens OX=9606 GN=RCC1 PE=1 SV=9;tr|C9JMJ4|C9JMJ4_HUMAN Regulat	Homo sapiens	6	1	1	3.5	24.465	230	0.0077121	5.8869	1051000	0	70	0			169
Q14166	Tubulin--tyrosine ligase-like protein 12	TTLL12	TTLL12	sp|Q14166|TTL12_HUMAN Tubulin--tyrosine ligase-like protein 12 OS=Homo sapiens OX=9606 GN=TTLL12 PE=1 SV=2	Homo sapiens	1	4	4	7.3	74.403	644	0	27.727	1050500	0	70	0			677
H0YLU7;P13804;H0YK49;H0YL12;H0YNX6;H0YKF0;H0YL83	Electron transfer flavoprotein subunit alpha, mitochondrial	ETFA	ETFA	tr|H0YLU7|H0YLU7_HUMAN Electron transfer flavoprotein subunit alpha, mitochondrial (Fragment) OS=Homo sapiens OX=9606 GN=ETFA PE=1 SV=1;sp|P13804|ETFA_HUMAN Electron transfer flavoprotein subunit alpha, mitochondrial OS=Homo sapiens OX=9606 GN=ETFA PE=1 SV	Homo sapiens	7	3	3	18.5	31.739	303	0	23.797	1032400	0	70	0			301
Q9UBH6	Xenotropic and polytropic retrovirus receptor 1	XPR1	XPR1	sp|Q9UBH6|XPR1_HUMAN Xenotropic and polytropic retrovirus receptor 1 OS=Homo sapiens OX=9606 GN=XPR1 PE=1 SV=1	Homo sapiens	1	1	1	4.3	81.534	696	1	-2	1030500	0	70	0	+		800
E7ESY4;Q13330;H0Y4T7;F8W9Y9;H7C3F3;E9PCS8;E7EQY4;F6RRE2;E7EV10;Q9BTC8	Metastasis-associated protein MTA1	MTA1	MTA1	tr|E7ESY4|E7ESY4_HUMAN Metastasis-associated protein MTA1 OS=Homo sapiens OX=9606 GN=MTA1 PE=1 SV=1;sp|Q13330|MTA1_HUMAN Metastasis-associated protein MTA1 OS=Homo sapiens OX=9606 GN=MTA1 PE=1 SV=2;tr|H0Y4T7|H0Y4T7_HUMAN Metastasis-associated protein MTA1	Homo sapiens	10	4	3	6.7	79.372	703	0	55.239	1026700	0	70	0			225
E9PLA9;G3V153;Q14444	Caprin-1	CAPRIN1	CAPRIN1	tr|E9PLA9|E9PLA9_HUMAN Caprin-1 (Fragment) OS=Homo sapiens OX=9606 GN=CAPRIN1 PE=1 SV=1;tr|G3V153|G3V153_HUMAN Caprin-1 OS=Homo sapiens OX=9606 GN=CAPRIN1 PE=1 SV=1;sp|Q14444|CAPR1_HUMAN Caprin-1 OS=Homo sapiens OX=9606 GN=CAPRIN1 PE=1 SV=2	Homo sapiens	3	3	3	22	20.236	186	0	23.396	1024800	0	70	0			247
O43592;F8WDU6	Exportin-T	XPOT	XPOT	sp|O43592|XPOT_HUMAN Exportin-T OS=Homo sapiens OX=9606 GN=XPOT PE=1 SV=2	Homo sapiens	2	4	4	5.6	109.96	962	0	56.848	1020200	0	70	0			398
P55060	Exportin-2	CSE1L	CSE1L	sp|P55060|XPO2_HUMAN Exportin-2 OS=Homo sapiens OX=9606 GN=CSE1L PE=1 SV=3	Homo sapiens	1	4	4	6.8	110.42	971	0	123.8	1004500	0	70	0			583
P19623;K7EKM4;K7ESL0	Spermidine synthase	SRM	SRM	sp|P19623|SPEE_HUMAN Spermidine synthase OS=Homo sapiens OX=9606 GN=SRM PE=1 SV=1;tr|K7EKM4|K7EKM4_HUMAN Spermidine synthase OS=Homo sapiens OX=9606 GN=SRM PE=1 SV=1;tr|K7ESL0|K7ESL0_HUMAN Spermidine synthase (Fragment) OS=Homo sapiens OX=9606 GN=SRM PE=1	Homo sapiens	3	4	4	12.9	33.824	302	0	32.015	997790	0	70	0			487
Q8TDW5	Synaptotagmin-like protein 5	SYTL5	SYTL5	sp|Q8TDW5|SYTL5_HUMAN Synaptotagmin-like protein 5 OS=Homo sapiens OX=9606 GN=SYTL5 PE=1 SV=1	Homo sapiens	1	1	1	4.5	81.522	730	0	6.8843	989800	0	70	0			744
Q14112;A0A087WZP6;H0YJV3	Nidogen-2	NID2	NID2	sp|Q14112|NID2_HUMAN Nidogen-2 OS=Homo sapiens OX=9606 GN=NID2 PE=1 SV=3;tr|A0A087WZP6|A0A087WZP6_HUMAN Nidogen-2 OS=Homo sapiens OX=9606 GN=NID2 PE=1 SV=1;tr|H0YJV3|H0YJV3_HUMAN Nidogen-2 (Fragment) OS=Homo sapiens OX=9606 GN=NID2 PE=1 SV=1	Homo sapiens	3	4	4	5	151.25	1375	0	112.66	976420	0	70	0			673
Q9UNN5;B3KT28;B1ANM7	FAS-associated factor 1	FAF1	FAF1	sp|Q9UNN5|FAF1_HUMAN FAS-associated factor 1 OS=Homo sapiens OX=9606 GN=FAF1 PE=1 SV=2;tr|B3KT28|B3KT28_HUMAN FAS-associated factor 1 OS=Homo sapiens OX=9606 GN=FAF1 PE=1 SV=1;tr|B1ANM7|B1ANM7_HUMAN FAS-associated factor 1 OS=Homo sapiens OX=9606 GN=FAF1 P	Homo sapiens	3	5	5	8.8	73.953	650	0	34.281	976290	0	70	0			810
Q9UKT6	F-box/LRR-repeat protein 21	FBXL21	FBXL21	sp|Q9UKT6|FXL21_HUMAN Putative F-box/LRR-repeat protein 21 OS=Homo sapiens OX=9606 GN=FBXL21P PE=5 SV=1	Homo sapiens	1	1	1	2.5	49.151	434	0.0052632	6.0058	974620	0	70	0			806
M0QZN2;M0R0F0;M0R0R2;P46782	40S ribosomal protein S5;40S ribosomal protein S5, N-terminally processed	RPS5	RPS5	tr|M0QZN2|M0QZN2_HUMAN 40S ribosomal protein S5 OS=Homo sapiens OX=9606 GN=RPS5 PE=1 SV=1;tr|M0R0F0|M0R0F0_HUMAN 40S ribosomal protein S5 (Fragment) OS=Homo sapiens OX=9606 GN=RPS5 PE=1 SV=1;tr|M0R0R2|M0R0R2_HUMAN 40S ribosomal protein S5 OS=Homo sapiens O	Homo sapiens	4	1	1	11.2	14.763	134	0	85.02	973600	0	70	0			366
O14967;D6RAZ4	Calmegin	CLGN	CLGN	sp|O14967|CLGN_HUMAN Calmegin OS=Homo sapiens OX=9606 GN=CLGN PE=1 SV=1;tr|D6RAZ4|D6RAZ4_HUMAN Calmegin (Fragment) OS=Homo sapiens OX=9606 GN=CLGN PE=1 SV=1	Homo sapiens	2	2	2	5.2	70.038	610	0	11.867	969610	0	70	0			387
Q9BQ67;M0QX71	Glutamate-rich WD repeat-containing protein 1	GRWD1	GRWD1	sp|Q9BQ67|GRWD1_HUMAN Glutamate-rich WD repeat-containing protein 1 OS=Homo sapiens OX=9606 GN=GRWD1 PE=1 SV=1;tr|M0QX71|M0QX71_HUMAN Glutamate-rich WD repeat-containing protein 1 (Fragment) OS=Homo sapiens OX=9606 GN=GRWD1 PE=1 SV=1	Homo sapiens	2	3	3	9	49.419	446	0	25.48	944290	0	70	0			770
H3BR35;P15170;Q8IYD1	Eukaryotic peptide chain release factor GTP-binding subunit ERF3A;Eukaryotic peptide chain release factor GTP-binding subunit ERF3B	GSPT1;GSPT2	GSPT1	tr|H3BR35|H3BR35_HUMAN Eukaryotic peptide chain release factor GTP-binding subunit ERF3A (Fragment) OS=Homo sapiens OX=9606 GN=GSPT1 PE=1 SV=1;sp|P15170|ERF3A_HUMAN Eukaryotic peptide chain release factor GTP-binding subunit ERF3A OS=Homo sapiens OX=9606 G	Homo sapiens	3	4	4	13.5	52.832	475	0	25.198	938490	0	70	0			305
I3L0P9;Q8N137	Centrobin	CNTROB	CNTROB	tr|I3L0P9|I3L0P9_HUMAN Centrobin (Fragment) OS=Homo sapiens OX=9606 GN=CNTROB PE=1 SV=1;sp|Q8N137|CNTRB_HUMAN Centrobin OS=Homo sapiens OX=9606 GN=CNTROB PE=1 SV=1	Homo sapiens	2	1	1	5.3	20.181	187	0	6.9679	938240	0	70	0			312
E9PGX9;E7ERC4;P05455;E9PFL9	Lupus La protein	SSB	SSB	tr|E9PGX9|E9PGX9_HUMAN Lupus La protein (Fragment) OS=Homo sapiens OX=9606 GN=SSB PE=1 SV=1;tr|E7ERC4|E7ERC4_HUMAN Lupus La protein (Fragment) OS=Homo sapiens OX=9606 GN=SSB PE=1 SV=1;sp|P05455|LA_HUMAN Lupus La protein OS=Homo sapiens OX=9606 GN=SSB PE=1	Homo sapiens	4	2	2	23.3	13.909	120	0	45.129	930270	0	70	0			223
F8VZJ2;F8W0W4;H0YHX9;Q13765;E9PAV3;F8W1N5;F8VNW4;F8VZ58;Q9BZK3	Nascent polypeptide-associated complex subunit alpha;Nascent polypeptide-associated complex subunit alpha, muscle-specific form	NACA	NACA	tr|F8VZJ2|F8VZJ2_HUMAN Nascent polypeptide-associated complex subunit alpha OS=Homo sapiens OX=9606 GN=NACA PE=1 SV=1;tr|F8W0W4|F8W0W4_HUMAN Nascent polypeptide-associated complex subunit alpha (Fragment) OS=Homo sapiens OX=9606 GN=NACA PE=1 SV=1;tr|H0YHX9	Homo sapiens	9	5	5	40.4	15.016	136	0	43.835	920390	0	70	0			230
P31153	S-adenosylmethionine synthase isoform type-2	MAT2A	MAT2A	sp|P31153|METK2_HUMAN S-adenosylmethionine synthase isoform type-2 OS=Homo sapiens OX=9606 GN=MAT2A PE=1 SV=1	Homo sapiens	1	2	2	5.8	43.66	395	0	40.502	919010	0	70	0			525
E9PH38;B3KQV6;P30153	Serine/threonine-protein phosphatase 2A 65 kDa regulatory subunit A alpha isoform	PPP2R1A	PPP2R1A	tr|E9PH38|E9PH38_HUMAN Serine/threonine-protein phosphatase 2A 65 kDa regulatory subunit A alpha isoform (Fragment) OS=Homo sapiens OX=9606 GN=PPP2R1A PE=1 SV=2;tr|B3KQV6|B3KQV6_HUMAN Serine/threonine-protein phosphatase 2A 65 kDa regulatory subunit A alph	Homo sapiens	3	1	1	15.2	14.509	132	0	6.9764	907000	0	70	0			142
Q8NBJ4	Golgi membrane protein 1	GOLM1	GOLM1	sp|Q8NBJ4|GOLM1_HUMAN Golgi membrane protein 1 OS=Homo sapiens OX=9606 GN=GOLM1 PE=1 SV=1	Homo sapiens	1	4	4	10.7	45.333	401	0	45.424	901640	0	70	0			743
O75475	PC4 and SFRS1-interacting protein	PSIP1	PSIP1	sp|O75475|PSIP1_HUMAN PC4 and SFRS1-interacting protein OS=Homo sapiens OX=9606 GN=PSIP1 PE=1 SV=1	Homo sapiens	1	1	1	1.5	60.103	530	0.0076923	5.8737	891600	0	70	0			408
P14868;C9J7S3;C9JLC1;C9JQM9;H7BZ35	Aspartate--tRNA ligase, cytoplasmic	DARS	DARS	sp|P14868|SYDC_HUMAN Aspartate--tRNA ligase, cytoplasmic OS=Homo sapiens OX=9606 GN=DARS1 PE=1 SV=2;tr|C9J7S3|C9J7S3_HUMAN Aspartyl-tRNA synthetase (Fragment) OS=Homo sapiens OX=9606 GN=DARS1 PE=1 SV=8;tr|C9JLC1|C9JLC1_HUMAN Aspartyl-tRNA synthetase (Fragm	Homo sapiens	5	4	4	9.8	57.136	501	0	28.667	877620	0	70	0			475
D6REM6;A0A0R4J2E8;A8MXP9;P43243;D6R991;D6RBK5;H0Y8T4;B3KM87	Matrin-3	MATR3	MATR3	tr|D6REM6|D6REM6_HUMAN Matrin-3 OS=Homo sapiens OX=9606 GN=MATR3 PE=1 SV=1;tr|A0A0R4J2E8|A0A0R4J2E8_HUMAN Matrin-3 OS=Homo sapiens OX=9606 GN=MATR3 PE=1 SV=1;tr|A8MXP9|A8MXP9_HUMAN Matrin-3 OS=Homo sapiens OX=9606 GN=MATR3 PE=1 SV=1;sp|P43243|MATR3_HUMAN M	Homo sapiens	8	3	3	6.4	88.358	794	0	23.824	871310	0	70	0			59
Q9NSD9	Phenylalanine--tRNA ligase beta subunit	FARSB	FARSB	sp|Q9NSD9|SYFB_HUMAN Phenylalanine--tRNA ligase beta subunit OS=Homo sapiens OX=9606 GN=FARSB PE=1 SV=3	Homo sapiens	1	5	5	10.4	66.115	589	0	33.939	868990	0	70	0			793
P19387;H3BRR2	DNA-directed RNA polymerase II subunit RPB3	POLR2C	POLR2C	sp|P19387|RPB3_HUMAN DNA-directed RNA polymerase II subunit RPB3 OS=Homo sapiens OX=9606 GN=POLR2C PE=1 SV=2;tr|H3BRR2|H3BRR2_HUMAN DNA-directed RNA polymerase II subunit RPB3 OS=Homo sapiens OX=9606 GN=POLR2C PE=1 SV=1	Homo sapiens	2	4	4	22.5	31.441	275	0	149.88	863940	0	70	0			485
B9ZVN9;O95602	DNA-directed RNA polymerase;DNA-directed RNA polymerase I subunit RPA1	POLR1A	POLR1A	tr|B9ZVN9|B9ZVN9_HUMAN DNA-directed RNA polymerase subunit OS=Homo sapiens OX=9606 GN=POLR1A PE=1 SV=1;sp|O95602|RPA1_HUMAN DNA-directed RNA polymerase I subunit RPA1 OS=Homo sapiens OX=9606 GN=POLR1A PE=1 SV=2	Homo sapiens	2	5	5	4.7	187.81	1659	0	163.25	852930	0	70	0			162
A2AVK2;Q5VSF9;Q05586	Glutamate receptor ionotropic, NMDA 1	GRIN1	GRIN1	tr|A2AVK2|A2AVK2_HUMAN Glutamate receptor ionotropic, NMDA 1 OS=Homo sapiens OX=9606 GN=GRIN1 PE=1 SV=2;tr|Q5VSF9|Q5VSF9_HUMAN Glutamate receptor OS=Homo sapiens OX=9606 GN=GRIN1 PE=1 SV=2;sp|Q05586|NMDZ1_HUMAN Glutamate receptor ionotropic, NMDA 1 OS=Homo	Homo sapiens	3	1	1	5.3	40.033	356	1	-2	848610	0	70	0	+		122
J3QSB4;P26373	60S ribosomal protein L13	RPL13	RPL13	tr|J3QSB4|J3QSB4_HUMAN 60S ribosomal protein L13 (Fragment) OS=Homo sapiens OX=9606 GN=RPL13 PE=1 SV=1;sp|P26373|RL13_HUMAN 60S ribosomal protein L13 OS=Homo sapiens OX=9606 GN=RPL13 PE=1 SV=4	Homo sapiens	2	2	2	15.1	14.692	126	0	29.118	848270	0	70	0			328
O43396;K7ER96;K7EKG2;K7EPB7	Thioredoxin-like protein 1	TXNL1	TXNL1	sp|O43396|TXNL1_HUMAN Thioredoxin-like protein 1 OS=Homo sapiens OX=9606 GN=TXNL1 PE=1 SV=3;tr|K7ER96|K7ER96_HUMAN Thioredoxin-like protein 1 (Fragment) OS=Homo sapiens OX=9606 GN=TXNL1 PE=1 SV=1	Homo sapiens	4	3	3	18	32.251	289	0	17.895	844220	0	70	0			397
P42285;H0Y8U3	Superkiller viralicidic activity 2-like 2	SKIV2L2	SKIV2L2	sp|P42285|MTREX_HUMAN Exosome RNA helicase MTR4 OS=Homo sapiens OX=9606 GN=MTREX PE=1 SV=3	Homo sapiens	2	3	3	3.6	117.8	1042	0	27.405	842890	0	70	0			547
P10809;E7ESH4	60 kDa heat shock protein, mitochondrial	HSPD1	HSPD1	sp|P10809|CH60_HUMAN 60 kDa heat shock protein, mitochondrial OS=Homo sapiens OX=9606 GN=HSPD1 PE=1 SV=2;tr|E7ESH4|E7ESH4_HUMAN 60 kDa heat shock protein, mitochondrial (Fragment) OS=Homo sapiens OX=9606 GN=HSPD1 PE=1 SV=1	Homo sapiens	2	2	2	5.9	61.054	573	0	12.813	842000	0	70	0			452
A0A087X1G4;Q86X67	Nucleoside diphosphate-linked moiety X motif 13	NUDT13	NUDT13	tr|A0A087X1G4|A0A087X1G4_HUMAN NAD(P)H pyrophosphatase NUDT13, mitochondrial OS=Homo sapiens OX=9606 GN=NUDT13 PE=1 SV=1;sp|Q86X67|NUD13_HUMAN NAD(P)H pyrophosphatase NUDT13, mitochondrial OS=Homo sapiens OX=9606 GN=NUDT13 PE=2 SV=3	Homo sapiens	2	1	1	3.3	27.156	241	0.0040706	6.1587	837460	0	70	0			28
A0A0G2JJZ9;Q13838;A0A140T9X3;Q5STU3;A0A140T9L4;A0A140T973;A0A140T9K1;A0A140T996;F6S4E6;A0A0A0MT12;F6TRA5;F6WLT2;A0A140T9K2;A0A140T9N3;A0A140T9X9;H0Y400;F6QYI9;A0A0G2JJL7;F6R6M7;F6UJC5;A0A140TA18	Spliceosome RNA helicase DDX39B	DDX39B	DDX39B	tr|A0A0G2JJZ9|A0A0G2JJZ9_HUMAN Spliceosome RNA helicase DDX39B (Fragment) OS=Homo sapiens OX=9606 GN=DDX39B PE=1 SV=1;sp|Q13838|DX39B_HUMAN Spliceosome RNA helicase DDX39B OS=Homo sapiens OX=9606 GN=DDX39B PE=1 SV=1;tr|A0A140T9X3|A0A140T9X3_HUMAN Spliceoso	Homo sapiens	21	5	1	15.2	38.125	328	0.0028571	6.4385	834590	0	70	0			56
Q9H9Y6;H7C0D9;F8WDS4;F8WAK7;F8WBB9;F8WCS3;C9JJG2;C9JS83	DNA-directed RNA polymerase I subunit RPA2	POLR1B	POLR1B	sp|Q9H9Y6|RPA2_HUMAN DNA-directed RNA polymerase I subunit RPA2 OS=Homo sapiens OX=9606 GN=POLR1B PE=1 SV=2	Homo sapiens	8	7	7	7.5	128.23	1135	0	96.708	833490	0	70	0			787
Q99436;Q5TBG5	Proteasome subunit beta type-7	PSMB7	PSMB7	sp|Q99436|PSB7_HUMAN Proteasome subunit beta type-7 OS=Homo sapiens OX=9606 GN=PSMB7 PE=1 SV=1	Homo sapiens	2	3	3	20.6	29.965	277	0	57.204	831690	0	70	0			766
Q8N543;A0A0A0MTR2;H3BUA6	Prolyl 3-hydroxylase OGFOD1	OGFOD1	OGFOD1	sp|Q8N543|OGFD1_HUMAN Prolyl 3-hydroxylase OGFOD1 OS=Homo sapiens OX=9606 GN=OGFOD1 PE=1 SV=1;tr|A0A0A0MTR2|A0A0A0MTR2_HUMAN Prolyl 3-hydroxylase OGFOD1 OS=Homo sapiens OX=9606 GN=OGFOD1 PE=1 SV=1	Homo sapiens	3	3	3	10.7	63.245	542	0	18.382	826880	0	70	0			740
H0Y8C6;O00410;E7ETV3;E7EWK4;E7EX05;E7EV12;E7EQT5;H0Y3V4;C9J875;C9JQT6;C9JZD8;E7ETV8;E7ESZ1	Importin-5	IPO5	IPO5	tr|H0Y8C6|H0Y8C6_HUMAN Importin-5 (Fragment) OS=Homo sapiens OX=9606 GN=IPO5 PE=1 SV=1;sp|O00410|IPO5_HUMAN Importin-5 OS=Homo sapiens OX=9606 GN=IPO5 PE=1 SV=4;tr|E7ETV3|E7ETV3_HUMAN Importin-5 (Fragment) OS=Homo sapiens OX=9606 GN=IPO5 PE=1 SV=1;tr|E7EWK	Homo sapiens	13	4	4	5.9	123.75	1099	0	58.038	825980	0	70	0			288
Q14257;H0YL43;A8MXP8	Reticulocalbin-2	RCN2	RCN2	sp|Q14257|RCN2_HUMAN Reticulocalbin-2 OS=Homo sapiens OX=9606 GN=RCN2 PE=1 SV=1;tr|H0YL43|H0YL43_HUMAN Reticulocalbin-2 (Fragment) OS=Homo sapiens OX=9606 GN=RCN2 PE=1 SV=1;tr|A8MXP8|A8MXP8_HUMAN Reticulocalbin-2 OS=Homo sapiens OX=9606 GN=RCN2 PE=1 SV=1	Homo sapiens	3	2	2	13.2	36.876	317	0	107.94	824170	0	70	0			679
O95376	E3 ubiquitin-protein ligase ARIH2	ARIH2	ARIH2	sp|O95376|ARI2_HUMAN E3 ubiquitin-protein ligase ARIH2 OS=Homo sapiens OX=9606 GN=ARIH2 PE=1 SV=1	Homo sapiens	1	2	2	3.7	57.818	493	0	13.33	823200	0	70	0			418
Q15738;C9JDR0	Sterol-4-alpha-carboxylate 3-dehydrogenase, decarboxylating	NSDHL	NSDHL	sp|Q15738|NSDHL_HUMAN Sterol-4-alpha-carboxylate 3-dehydrogenase, decarboxylating OS=Homo sapiens OX=9606 GN=NSDHL PE=1 SV=2;tr|C9JDR0|C9JDR0_HUMAN Sterol-4-alpha-carboxylate 3-dehydrogenase, decarboxylating (Fragment) OS=Homo sapiens OX=9606 GN=NSDHL PE=1	Homo sapiens	2	3	3	13.4	41.9	373	0	21.254	815770	0	70	0			695
M0QZC5;P62280	40S ribosomal protein S11	RPS11	RPS11	tr|M0QZC5|M0QZC5_HUMAN 40S ribosomal protein S11 OS=Homo sapiens OX=9606 GN=RPS11 PE=1 SV=1;sp|P62280|RS11_HUMAN 40S ribosomal protein S11 OS=Homo sapiens OX=9606 GN=RPS11 PE=1 SV=3	Homo sapiens	2	2	2	17.8	13.997	118	0	18.471	807770	0	70	0			364
P50570;A0A1B0GUX5;A0A1B0GU67;E5RIK2;E5RHK8;A0A0D9SFB1;A0A0U1RQP1;A0A0D9SFE4;Q05193;Q9UQ16	Dynamin-2	DNM2	DNM2	sp|P50570|DYN2_HUMAN Dynamin-2 OS=Homo sapiens OX=9606 GN=DNM2 PE=1 SV=2	Homo sapiens	10	4	4	6.2	98.063	870	0	30.788	805560	0	70	0			566
O43815	Striatin	STRN	STRN	sp|O43815|STRN_HUMAN Striatin OS=Homo sapiens OX=9606 GN=STRN PE=1 SV=4	Homo sapiens	1	2	2	4.5	86.131	780	0	53.329	795410	0	70	0			400
P46781;B5MCT8;C9JM19;F2Z3C0;A8MXK4	40S ribosomal protein S9	RPS9	RPS9	sp|P46781|RS9_HUMAN 40S ribosomal protein S9 OS=Homo sapiens OX=9606 GN=RPS9 PE=1 SV=3;tr|B5MCT8|B5MCT8_HUMAN 40S ribosomal protein S9 OS=Homo sapiens OX=9606 GN=RPS9 PE=1 SV=1;tr|C9JM19|C9JM19_HUMAN 40S ribosomal protein S9 OS=Homo sapiens OX=9606 GN=RPS9	Homo sapiens	5	3	3	14.4	22.591	194	0	17.327	794380	0	70	0			553
P62269;A0A0G2JQH2;Q5GGW2;J3JS69	40S ribosomal protein S18	RPS18	RPS18	sp|P62269|RS18_HUMAN 40S ribosomal protein S18 OS=Homo sapiens OX=9606 GN=RPS18 PE=1 SV=3	Homo sapiens	4	5	5	27.6	17.718	152	0	55.362	790680	0	70	0			608
F8WE72;Q9Y3A5;A0A087X020	Ribosome maturation protein SBDS	SBDS	SBDS	tr|F8WE72|F8WE72_HUMAN Ribosome maturation protein SBDS OS=Homo sapiens OX=9606 GN=SBDS PE=1 SV=1;sp|Q9Y3A5|SBDS_HUMAN Ribosome maturation protein SBDS OS=Homo sapiens OX=9606 GN=SBDS PE=1 SV=4;tr|A0A087X020|A0A087X020_HUMAN Ribosome maturation protein SBD	Homo sapiens	3	2	2	34.9	9.7691	86	0	28.971	780080	0	70	0			273
A0A087X256;Q2M389;F8VYH7;F8W1W1	WASH complex subunit 7	KIAA1033	KIAA1033	tr|A0A087X256|A0A087X256_HUMAN WASH complex subunit 4 OS=Homo sapiens OX=9606 GN=WASHC4 PE=1 SV=1;sp|Q2M389|WASC4_HUMAN WASH complex subunit 4 OS=Homo sapiens OX=9606 GN=WASHC4 PE=1 SV=2	Homo sapiens	4	5	5	5.6	136.5	1174	0	59.864	769890	0	70	0			30
A8MYR4;H0YK39;P52657	Transcription initiation factor IIA subunit 2	GTF2A2	GTF2A2	tr|A8MYR4|A8MYR4_HUMAN Transcription initiation factor IIA gamma chain OS=Homo sapiens OX=9606 GN=GTF2A2 PE=1 SV=1;tr|H0YK39|H0YK39_HUMAN Transcription initiation factor IIA gamma chain (Fragment) OS=Homo sapiens OX=9606 GN=GTF2A2 PE=1 SV=1;sp|P52657|T2AG_	Homo sapiens	3	1	1	13.2	7.7969	68	0	7.1354	769730	0	70	0			131
G3V5Z3;Q6IN85;G3V5A2;H0YIY8;G3V4R3;G3V231;H0YJN6;Q5MIZ7	Serine/threonine-protein phosphatase 4 regulatory subunit 3A	SMEK1	SMEK1	tr|G3V5Z3|G3V5Z3_HUMAN Serine/threonine-protein phosphatase 4 regulatory subunit 3A OS=Homo sapiens OX=9606 GN=PPP4R3A PE=1 SV=1;sp|Q6IN85|P4R3A_HUMAN Serine/threonine-protein phosphatase 4 regulatory subunit 3A OS=Homo sapiens OX=9606 GN=PPP4R3A PE=1 SV=1	Homo sapiens	8	3	3	6.1	82.03	706	0	54.58	766200	0	70	0			280
K7EJE8;K7EKE6;P36776;K7EQF8;K7ER27	Lon protease homolog, mitochondrial	LONP1	LONP1	tr|K7EJE8|K7EJE8_HUMAN Lon protease homolog, mitochondrial OS=Homo sapiens OX=9606 GN=LONP1 PE=1 SV=1;tr|K7EKE6|K7EKE6_HUMAN Lon protease homolog, mitochondrial OS=Homo sapiens OX=9606 GN=LONP1 PE=1 SV=1;sp|P36776|LONM_HUMAN Lon protease homolog, mitochond	Homo sapiens	5	4	4	6.3	93.296	829	0	33.211	761070	0	70	0			334
E9PBS1;P22234;D6RF62	Multifunctional protein ADE2;Phosphoribosylaminoimidazole-succinocarboxamide synthase;Phosphoribosylaminoimidazole carboxylase	PAICS	PAICS	tr|E9PBS1|E9PBS1_HUMAN AIR carboxylase (Fragment) OS=Homo sapiens OX=9606 GN=PAICS PE=1 SV=1;sp|P22234|PUR6_HUMAN Multifunctional protein ADE2 OS=Homo sapiens OX=9606 GN=PAICS PE=1 SV=3	Homo sapiens	3	3	3	7.5	45.651	413	0	30.364	747590	0	70	0			231
P49721;A0A087WVV1	Proteasome subunit beta type-2	PSMB2	PSMB2	sp|P49721|PSB2_HUMAN Proteasome subunit beta type-2 OS=Homo sapiens OX=9606 GN=PSMB2 PE=1 SV=1	Homo sapiens	2	3	3	16.9	22.836	201	0	20.658	730630	0	70	0			564
B4DJV5;Q13610	Periodic tryptophan protein 1 homolog	PWP1	PWP1	tr|B4DJV5|B4DJV5_HUMAN Periodic tryptophan protein 1 homolog OS=Homo sapiens OX=9606 GN=PWP1 PE=1 SV=1;sp|Q13610|PWP1_HUMAN Periodic tryptophan protein 1 homolog OS=Homo sapiens OX=9606 GN=PWP1 PE=1 SV=1	Homo sapiens	2	2	2	7.3	49.038	439	0	13.665	718530	0	70	0			147
P42677;H0YMV8;Q71UM5;C9J1C5;C9JLI6	40S ribosomal protein S27;40S ribosomal protein S27-like	RPS27;RPS27L	RPS27	sp|P42677|RS27_HUMAN 40S ribosomal protein S27 OS=Homo sapiens OX=9606 GN=RPS27 PE=1 SV=3;tr|H0YMV8|H0YMV8_HUMAN 40S ribosomal protein S27 OS=Homo sapiens OX=9606 GN=RPS27L PE=1 SV=1;sp|Q71UM5|RS27L_HUMAN 40S ribosomal protein S27-like OS=Homo sapiens OX=9	Homo sapiens	5	3	3	38.1	9.461	84	0	17.641	714440	0	70	0			548
P30837;H0Y2X5;H0YMG7;P00352;P47895;P05091;O94788	Aldehyde dehydrogenase X, mitochondrial	ALDH1B1	ALDH1B1	sp|P30837|AL1B1_HUMAN Aldehyde dehydrogenase X, mitochondrial OS=Homo sapiens OX=9606 GN=ALDH1B1 PE=1 SV=3	Homo sapiens	7	4	4	9.5	57.206	517	0	39.831	701240	0	70	0			524
P11047	Laminin subunit gamma-1	LAMC1	LAMC1	sp|P11047|LAMC1_HUMAN Laminin subunit gamma-1 OS=Homo sapiens OX=9606 GN=LAMC1 PE=1 SV=3	Homo sapiens	1	2	2	1.7	177.6	1609	0	37.628	679770	0	70	0			455
P51858	Hepatoma-derived growth factor	HDGF	HDGF	sp|P51858|HDGF_HUMAN Hepatoma-derived growth factor OS=Homo sapiens OX=9606 GN=HDGF PE=1 SV=1	Homo sapiens	1	2	2	17.5	26.788	240	0	13.249	674920	0	70	0			570
P63151;E5RIY1;E5RFR9;A0A590UJJ1;A0A590UJY3;Q00005;Q66LE6;H0YB06;Q9Y2T4	Serine/threonine-protein phosphatase 2A 55 kDa regulatory subunit B alpha isoform;Serine/threonine-protein phosphatase 2A 55 kDa regulatory subunit B beta isoform;Serine/threonine-protein phosphatase 2A 55 kDa regulatory subunit B delta isoform	PPP2R2A;PPP2R2B;PPP2R2D	PPP2R2A	sp|P63151|2ABA_HUMAN Serine/threonine-protein phosphatase 2A 55 kDa regulatory subunit B alpha isoform OS=Homo sapiens OX=9606 GN=PPP2R2A PE=1 SV=1;tr|E5RIY1|E5RIY1_HUMAN Serine/threonine-protein phosphatase 2A 55 kDa regulatory subunit B alpha isoform OS=	Homo sapiens	9	4	4	12.5	51.691	447	0	47.678	673460	0	70	0			621
A0A0C4DG90;A4D0S4	Laminin subunit beta-4	LAMB4	LAMB4	tr|A0A0C4DG90|A0A0C4DG90_HUMAN Laminin subunit beta-4 (Fragment) OS=Homo sapiens OX=9606 GN=LAMB4 PE=1 SV=1;sp|A4D0S4|LAMB4_HUMAN Laminin subunit beta-4 OS=Homo sapiens OX=9606 GN=LAMB4 PE=2 SV=1	Homo sapiens	2	1	1	2	82.772	749	1	-2	658870	0	70	0	+		48
Q15717;M0QZR9;A0A494C0Q5;A0A494C0M6;A0A494C011;A0A494C173;B1AM48;A0A494C015;A0A494C1D9;A0A494C0F8;B1APY9;A0A494C147;A0A0A0MRX1;A0A0R4J2E6;Q12926;P26378	ELAV-like protein 1	ELAVL1	ELAVL1	sp|Q15717|ELAV1_HUMAN ELAV-like protein 1 OS=Homo sapiens OX=9606 GN=ELAVL1 PE=1 SV=2;tr|M0QZR9|M0QZR9_HUMAN ELAV-like protein 1 OS=Homo sapiens OX=9606 GN=ELAVL1 PE=1 SV=1	Homo sapiens	16	3	3	10.1	36.091	326	0	31.676	656830	0	70	0			694
F8VR82;F8VYE8;P36873;A0A087WYY5;E7ETD8;F8W0W8;P62136;F8WE71;H0Y3Y6;F5H1L6;F5H037;E9PMD7	Serine/threonine-protein phosphatase;Serine/threonine-protein phosphatase PP1-gamma catalytic subunit;Serine/threonine-protein phosphatase PP1-alpha catalytic subunit	PPP1CC;PPP1CB;PPP1CA	PPP1CC	tr|F8VR82|F8VR82_HUMAN Serine/threonine-protein phosphatase OS=Homo sapiens OX=9606 GN=PPP1CC PE=1 SV=1;tr|F8VYE8|F8VYE8_HUMAN Serine/threonine-protein phosphatase OS=Homo sapiens OX=9606 GN=PPP1CC PE=1 SV=1;sp|P36873|PP1G_HUMAN Serine/threonine-protein ph	Homo sapiens	12	3	1	18.1	30.987	270	0	131.5	655060	0	70	0			261
Q9H1E5	Thioredoxin-related transmembrane protein 4	TMX4	TMX4	sp|Q9H1E5|TMX4_HUMAN Thioredoxin-related transmembrane protein 4 OS=Homo sapiens OX=9606 GN=TMX4 PE=1 SV=1	Homo sapiens	1	3	3	8.3	38.952	349	0	29.703	643060	0	70	0			783
Q9NQC3	Reticulon-4	RTN4	RTN4	sp|Q9NQC3|RTN4_HUMAN Reticulon-4 OS=Homo sapiens OX=9606 GN=RTN4 PE=1 SV=2	Homo sapiens	1	7	1	10.2	129.93	1192	0.001462	6.6758	632970	0	70	0			789
Q92905	COP9 signalosome complex subunit 5	COPS5	COPS5	sp|Q92905|CSN5_HUMAN COP9 signalosome complex subunit 5 OS=Homo sapiens OX=9606 GN=COPS5 PE=1 SV=4	Homo sapiens	1	1	1	2.4	37.578	334	0.0027855	6.3525	628530	0	70	0			752
Q14118	Dystroglycan;Alpha-dystroglycan;Beta-dystroglycan	DAG1	DAG1	sp|Q14118|DAG1_HUMAN Dystroglycan OS=Homo sapiens OX=9606 GN=DAG1 PE=1 SV=2	Homo sapiens	1	2	2	4.4	97.44	895	0	11.118	627110	0	70	0			674
F8WBH7;O95456	Proteasome assembly chaperone 1	PSMG1	PSMG1	tr|F8WBH7|F8WBH7_HUMAN Proteasome assembly chaperone 1 OS=Homo sapiens OX=9606 GN=PSMG1 PE=1 SV=1;sp|O95456|PSMG1_HUMAN Proteasome assembly chaperone 1 OS=Homo sapiens OX=9606 GN=PSMG1 PE=1 SV=1	Homo sapiens	2	1	1	15.9	7.182	63	0	6.7132	623780	0	70	0			271
Q16643;D6RCR4;D6R9W4;D6R9Q9	Drebrin	DBN1	DBN1	sp|Q16643|DREB_HUMAN Drebrin OS=Homo sapiens OX=9606 GN=DBN1 PE=1 SV=4;tr|D6RCR4|D6RCR4_HUMAN Drebrin (Fragment) OS=Homo sapiens OX=9606 GN=DBN1 PE=1 SV=1;tr|D6R9W4|D6R9W4_HUMAN Drebrin (Fragment) OS=Homo sapiens OX=9606 GN=DBN1 PE=1 SV=1;tr|D6R9Q9|D6R9Q9_	Homo sapiens	4	2	2	7.1	71.428	649	0	37.726	622880	0	70	0			700
H0YJ46;Q8TC12	Retinol dehydrogenase 11	RDH11	RDH11	tr|H0YJ46|H0YJ46_HUMAN Retinol dehydrogenase 11 (Fragment) OS=Homo sapiens OX=9606 GN=RDH11 PE=1 SV=1;sp|Q8TC12|RDH11_HUMAN Retinol dehydrogenase 11 OS=Homo sapiens OX=9606 GN=RDH11 PE=1 SV=2	Homo sapiens	2	1	1	12.3	23.173	204	1	-2	611530	0	70	0	+		295
Q9Y2T2	AP-3 complex subunit mu-1	AP3M1	AP3M1	sp|Q9Y2T2|AP3M1_HUMAN AP-3 complex subunit mu-1 OS=Homo sapiens OX=9606 GN=AP3M1 PE=1 SV=1	Homo sapiens	1	1	1	5.5	46.939	418	0	11.223	610920	0	70	0			820
D6REM4;E7ETM0;A0A5F9W493;U3KPX3;A0A590UJ43;Q8N752;P48729	Casein kinase I isoform alpha-like;Casein kinase I isoform alpha	CSNK1A1;CSNK1A1L	CSNK1A1	tr|D6REM4|D6REM4_HUMAN Casein kinase I isoform alpha OS=Homo sapiens OX=9606 GN=CSNK1A1 PE=1 SV=1;tr|E7ETM0|E7ETM0_HUMAN Casein kinase I isoform alpha OS=Homo sapiens OX=9606 GN=CSNK1A1 PE=1 SV=1;tr|A0A5F9W493|A0A5F9W493_HUMAN Casein kinase 1, alpha 1, iso	Homo sapiens	7	1	1	5.1	27.741	236	1	-2	607970	0	70	0	+		103
P61353;K7EQQ9;K7ERY7;K7ELC7	60S ribosomal protein L27	RPL27	RPL27	sp|P61353|RL27_HUMAN 60S ribosomal protein L27 OS=Homo sapiens OX=9606 GN=RPL27 PE=1 SV=2;tr|K7EQQ9|K7EQQ9_HUMAN 60S ribosomal protein L27 OS=Homo sapiens OX=9606 GN=RPL27 PE=1 SV=2;tr|K7ERY7|K7ERY7_HUMAN 60S ribosomal protein L27 OS=Homo sapiens OX=9606 G	Homo sapiens	4	2	2	12.5	15.798	136	0	11.927	607380	0	70	0			598
E5RH77;A0A2R8Y811;P62263	40S ribosomal protein S14	RPS14	RPS14	tr|E5RH77|E5RH77_HUMAN 40S ribosomal protein S14 OS=Homo sapiens OX=9606 GN=RPS14 PE=1 SV=1;tr|A0A2R8Y811|A0A2R8Y811_HUMAN 40S ribosomal protein S14 (Fragment) OS=Homo sapiens OX=9606 GN=RPS14 PE=1 SV=1;sp|P62263|RS14_HUMAN 40S ribosomal protein S14 OS=Hom	Homo sapiens	3	3	3	25.4	14.295	134	0	18.117	605990	0	70	0			82
I3L3E9;P39748	Flap endonuclease 1	FEN1	FEN1	tr|I3L3E9|I3L3E9_HUMAN Flap endonuclease 1 (Fragment) OS=Homo sapiens OX=9606 GN=FEN1 PE=1 SV=1;sp|P39748|FEN1_HUMAN Flap endonuclease 1 OS=Homo sapiens OX=9606 GN=FEN1 PE=1 SV=1	Homo sapiens	2	1	1	13	17.799	154	0	7.1467	601800	0	70	0			316
B2ZWH1;Q9HB71	Calcyclin-binding protein	CACYBP	CACYBP	tr|B2ZWH1|B2ZWH1_HUMAN Calcyclin-binding protein (Fragment) OS=Homo sapiens OX=9606 GN=CACYBP PE=1 SV=1;sp|Q9HB71|CYBP_HUMAN Calcyclin-binding protein OS=Homo sapiens OX=9606 GN=CACYBP PE=1 SV=2	Homo sapiens	2	2	2	36	5.8587	50	0	40.104	587930	0	70	0			141
Q9UBT2;K7EPL2;U3KQ55;K7ES38	SUMO-activating enzyme subunit 2	UBA2	UBA2	sp|Q9UBT2|SAE2_HUMAN SUMO-activating enzyme subunit 2 OS=Homo sapiens OX=9606 GN=UBA2 PE=1 SV=2;tr|K7EPL2|K7EPL2_HUMAN SUMO-activating enzyme subunit 2 (Fragment) OS=Homo sapiens OX=9606 GN=UBA2 PE=1 SV=2	Homo sapiens	4	3	3	4.4	71.223	640	0	17.023	577530	0	70	0			803
Q14137	Ribosome biogenesis protein BOP1	BOP1	BOP1	sp|Q14137|BOP1_HUMAN Ribosome biogenesis protein BOP1 OS=Homo sapiens OX=9606 GN=BOP1 PE=1 SV=2	Homo sapiens	1	2	2	6.4	83.629	746	0	13.172	574340	0	70	0			675
O94776	Metastasis-associated protein MTA2	MTA2	MTA2	sp|O94776|MTA2_HUMAN Metastasis-associated protein MTA2 OS=Homo sapiens OX=9606 GN=MTA2 PE=1 SV=1	Homo sapiens	1	3	2	5.2	75.022	668	0	90.359	567670	0	70	0			414
A0A499FI31;Q15020	Squamous cell carcinoma antigen recognized by T-cells 3	SART3	SART3	tr|A0A499FI31|A0A499FI31_HUMAN Squamous cell carcinoma antigen recognized by T-cells 3 OS=Homo sapiens OX=9606 GN=SART3 PE=1 SV=1;sp|Q15020|SART3_HUMAN Squamous cell carcinoma antigen recognized by T-cells 3 OS=Homo sapiens OX=9606 GN=SART3 PE=1 SV=1	Homo sapiens	2	3	3	4.7	111.96	981	0	20.156	556190	0	70	0			99
P46783;Q9NQ39	40S ribosomal protein S10;Putative 40S ribosomal protein S10-like	RPS10;RPS10P5	RPS10	sp|P46783|RS10_HUMAN 40S ribosomal protein S10 OS=Homo sapiens OX=9606 GN=RPS10 PE=1 SV=1;sp|Q9NQ39|RS10L_HUMAN Putative 40S ribosomal protein S10-like OS=Homo sapiens OX=9606 GN=RPS10P5 PE=5 SV=1	Homo sapiens	2	2	2	9.1	18.898	165	0	174.02	547300	0	70	0			554
J3QT28;O43684	Mitotic checkpoint protein BUB3	BUB3	BUB3	tr|J3QT28|J3QT28_HUMAN Mitotic checkpoint protein BUB3 (Fragment) OS=Homo sapiens OX=9606 GN=BUB3 PE=1 SV=1;sp|O43684|BUB3_HUMAN Mitotic checkpoint protein BUB3 OS=Homo sapiens OX=9606 GN=BUB3 PE=1 SV=1	Homo sapiens	2	2	2	8.6	31.703	278	0	12.747	545530	0	70	0			329
E9PPI9;Q9NPD3	Exosome complex component RRP41	EXOSC4	EXOSC4	tr|E9PPI9|E9PPI9_HUMAN Exosome complex component RRP41 OS=Homo sapiens OX=9606 GN=EXOSC4 PE=1 SV=1;sp|Q9NPD3|EXOS4_HUMAN Exosome complex component RRP41 OS=Homo sapiens OX=9606 GN=EXOSC4 PE=1 SV=3	Homo sapiens	2	1	1	7.7	16.579	156	0	31.63	540950	0	70	0			249
Q9H7Z7;X6RJ95;A6NHH0	Prostaglandin E synthase 2;Prostaglandin E synthase 2 truncated form	PTGES2	PTGES2	sp|Q9H7Z7|PGES2_HUMAN Prostaglandin E synthase 2 OS=Homo sapiens OX=9606 GN=PTGES2 PE=1 SV=1;tr|X6RJ95|X6RJ95_HUMAN Prostaglandin E synthase 2 (Fragment) OS=Homo sapiens OX=9606 GN=PTGES2 PE=1 SV=1	Homo sapiens	3	3	3	13.5	41.943	377	0	61.231	539360	0	70	0			786
B7Z645;O60506;F6UXX1;A0A6Q8PEX7	Heterogeneous nuclear ribonucleoprotein Q	SYNCRIP	SYNCRIP	tr|B7Z645|B7Z645_HUMAN Heterogeneous nuclear ribonucleoprotein Q OS=Homo sapiens OX=9606 GN=SYNCRIP PE=1 SV=1;sp|O60506|HNRPQ_HUMAN Heterogeneous nuclear ribonucleoprotein Q OS=Homo sapiens OX=9606 GN=SYNCRIP PE=1 SV=2;tr|F6UXX1|F6UXX1_HUMAN Heterogeneous	Homo sapiens	4	3	2	8.2	52.046	464	0	43.927	529200	0	70	0			155
F8WDK3;C9IZ04;Q9NY27	Serine/threonine-protein phosphatase 4 regulatory subunit 2	PPP4R2	PPP4R2	tr|F8WDK3|F8WDK3_HUMAN Serine/threonine-protein phosphatase 4 regulatory subunit 2 (Fragment) OS=Homo sapiens OX=9606 GN=PPP4R2 PE=1 SV=1;tr|C9IZ04|C9IZ04_HUMAN Serine/threonine-protein phosphatase 4 regulatory subunit 2 (Fragment) OS=Homo sapiens OX=9606	Homo sapiens	3	1	1	29	7.3124	62	1	-2	528980	0	70	0	+		164
A8MT72;Q2NKQ5;Q16799	Reticulon;Reticulon-1	RTN1	RTN1	tr|A8MT72|A8MT72_HUMAN Reticulon OS=Homo sapiens OX=9606 GN=RTN1 PE=1 SV=1;tr|Q2NKQ5|Q2NKQ5_HUMAN Reticulon OS=Homo sapiens OX=9606 GN=RTN1 PE=1 SV=1;sp|Q16799|RTN1_HUMAN Reticulon-1 OS=Homo sapiens OX=9606 GN=RTN1 PE=1 SV=1	Homo sapiens	3	1	1	4.1	21.862	193	0.0052425	5.9916	513330	0	70	0			128
Q8N6S5	ADP-ribosylation factor-like protein 6-interacting protein 6	ARL6IP6	ARL6IP6	sp|Q8N6S5|AR6P6_HUMAN ADP-ribosylation factor-like protein 6-interacting protein 6 OS=Homo sapiens OX=9606 GN=ARL6IP6 PE=1 SV=1	Homo sapiens	1	1	1	5.8	24.676	226	1	-2	510010	0	70	0	+		741
Q9GZL7	Ribosome biogenesis protein WDR12	WDR12	WDR12	sp|Q9GZL7|WDR12_HUMAN Ribosome biogenesis protein WDR12 OS=Homo sapiens OX=9606 GN=WDR12 PE=1 SV=2	Homo sapiens	1	2	2	9	47.707	423	0	28.09	507860	0	70	0			780
P20042	Eukaryotic translation initiation factor 2 subunit 2	EIF2S2	EIF2S2	sp|P20042|IF2B_HUMAN Eukaryotic translation initiation factor 2 subunit 2 OS=Homo sapiens OX=9606 GN=EIF2S2 PE=1 SV=2	Homo sapiens	1	2	2	5.4	38.388	333	0	34.667	506870	0	70	0			489
F5H7S3;H7BYY1;H0YKJ4;H0YK48;A0A494BZZ2;B7Z596;H0YN06		TPM1	TPM1	tr|F5H7S3|F5H7S3_HUMAN Tropomyosin alpha-1 chain OS=Homo sapiens OX=9606 GN=TPM1 PE=1 SV=2;tr|H7BYY1|H7BYY1_HUMAN Tropomyosin 1 (Alpha), isoform CRA_m OS=Homo sapiens OX=9606 GN=TPM1 PE=1 SV=1;tr|H0YKJ4|H0YKJ4_HUMAN Tropomyosin 1 (Alpha), isoform CRA_b OS=	Homo sapiens	7	9	2	23.7	28.524	245	0	12.851	501540	0	70	0			94
P42025	Beta-centractin	ACTR1B	ACTR1B	sp|P42025|ACTY_HUMAN Beta-centractin OS=Homo sapiens OX=9606 GN=ACTR1B PE=1 SV=1	Homo sapiens	1	4	1	13.6	42.293	376	0	9.0961	499490	0	70	0			546
P28070	Proteasome subunit beta type-4	PSMB4	PSMB4	sp|P28070|PSB4_HUMAN Proteasome subunit beta type-4 OS=Homo sapiens OX=9606 GN=PSMB4 PE=1 SV=4	Homo sapiens	1	2	2	9.1	29.204	264	0	24.22	495440	0	70	0			517
P49427	Ubiquitin-conjugating enzyme E2 R1	CDC34	CDC34	sp|P49427|UB2R1_HUMAN Ubiquitin-conjugating enzyme E2 R1 OS=Homo sapiens OX=9606 GN=CDC34 PE=1 SV=2	Homo sapiens	1	2	2	8.9	26.736	236	0	11.604	495330	0	70	0			562
C9JUG7;F8W9N7;P47755	F-actin-capping protein subunit alpha-2	CAPZA2	CAPZA2	tr|C9JUG7|C9JUG7_HUMAN F-actin-capping protein subunit alpha OS=Homo sapiens OX=9606 GN=CAPZA2 PE=1 SV=1;tr|F8W9N7|F8W9N7_HUMAN F-actin-capping protein subunit alpha OS=Homo sapiens OX=9606 GN=CAPZA2 PE=1 SV=1;sp|P47755|CAZA2_HUMAN F-actin-capping protein	Homo sapiens	3	1	1	9.6	16.698	146	0	8.3345	494180	0	70	0			177
A0A087WUX6;A0A087WX59;Q16186	Proteasomal ubiquitin receptor ADRM1	ADRM1	ADRM1	tr|A0A087WUX6|A0A087WUX6_HUMAN Proteasomal ubiquitin receptor ADRM1 (Fragment) OS=Homo sapiens OX=9606 GN=ADRM1 PE=1 SV=1;tr|A0A087WX59|A0A087WX59_HUMAN Proteasomal ubiquitin receptor ADRM1 OS=Homo sapiens OX=9606 GN=ADRM1 PE=1 SV=1;sp|Q16186|ADRM1_HUMAN P	Homo sapiens	3	1	1	10.6	14.946	141	0.0040486	6.1505	492600	0	70	0			14
E9PAK2		NHSL1	NHSL1	tr|E9PAK2|E9PAK2_HUMAN NHS-like protein 1 (Fragment) OS=Homo sapiens OX=9606 GN=NHSL1 PE=1 SV=1	Homo sapiens	1	1	1	6.8	25.115	221	1	-2	486240	0	70	0	+		229
P31942	Heterogeneous nuclear ribonucleoprotein H3	HNRNPH3	HNRNPH3	sp|P31942|HNRH3_HUMAN Heterogeneous nuclear ribonucleoprotein H3 OS=Homo sapiens OX=9606 GN=HNRNPH3 PE=1 SV=2	Homo sapiens	1	2	2	8.4	36.926	346	0	35.979	484120	0	70	0			528
Q92990	Glomulin	GLMN	GLMN	sp|Q92990|GLMN_HUMAN Glomulin OS=Homo sapiens OX=9606 GN=GLMN PE=1 SV=2	Homo sapiens	1	2	2	1.9	68.207	594	0	11.776	478380	0	70	0			754
P10599	Thioredoxin	TXN	TXN	sp|P10599|THIO_HUMAN Thioredoxin OS=Homo sapiens OX=9606 GN=TXN PE=1 SV=3	Homo sapiens	1	2	2	22.9	11.737	105	0	15.169	475230	0	70	0			451
Q712K3	Ubiquitin-conjugating enzyme E2 R2	UBE2R2	UBE2R2	sp|Q712K3|UB2R2_HUMAN Ubiquitin-conjugating enzyme E2 R2 OS=Homo sapiens OX=9606 GN=UBE2R2 PE=1 SV=1	Homo sapiens	1	1	1	4.6	27.166	238	0.0028249	6.3926	467580	0	70	0			722
Q9BPX3	Condensin complex subunit 3	NCAPG	NCAPG	sp|Q9BPX3|CND3_HUMAN Condensin complex subunit 3 OS=Homo sapiens OX=9606 GN=NCAPG PE=1 SV=1	Homo sapiens	1	2	2	2.6	114.33	1015	0	48.197	465580	0	70	0			769
Q14694;H3BQP1;H3BNS8;H3BQC6	Ubiquitin carboxyl-terminal hydrolase 10	USP10	USP10	sp|Q14694|UBP10_HUMAN Ubiquitin carboxyl-terminal hydrolase 10 OS=Homo sapiens OX=9606 GN=USP10 PE=1 SV=2;tr|H3BQP1|H3BQP1_HUMAN Ubiquitinyl hydrolase 1 (Fragment) OS=Homo sapiens OX=9606 GN=USP10 PE=1 SV=1	Homo sapiens	4	3	3	5.1	87.133	798	0	24.335	465020	0	70	0			681
A0A0B4J1W3;Q9BXJ9;Q6N069	N-alpha-acetyltransferase 15, NatA auxiliary subunit	NAA15	NAA15	tr|A0A0B4J1W3|A0A0B4J1W3_HUMAN N-alpha-acetyltransferase 15, NatA auxiliary subunit OS=Homo sapiens OX=9606 GN=NAA15 PE=1 SV=1;sp|Q9BXJ9|NAA15_HUMAN N-alpha-acetyltransferase 15, NatA auxiliary subunit OS=Homo sapiens OX=9606 GN=NAA15 PE=1 SV=1	Homo sapiens	3	4	4	5.7	101.2	865	0	31.288	460860	0	70	0			44
F8VXH9;H3BRU6;F8VZX2;Q15366;F8W0G4;F8W1G6;F8VTZ0;F8VRH0;J3QT27;E9PFP8;Q15365;P57721	Poly(rC)-binding protein 2	PCBP2	PCBP2	tr|F8VXH9|F8VXH9_HUMAN Poly(rC)-binding protein 2 (Fragment) OS=Homo sapiens OX=9606 GN=PCBP2 PE=1 SV=1;tr|H3BRU6|H3BRU6_HUMAN Poly(rC)-binding protein 2 (Fragment) OS=Homo sapiens OX=9606 GN=PCBP2 PE=1 SV=1;tr|F8VZX2|F8VZX2_HUMAN Poly(rC)-binding protein	Homo sapiens	12	3	3	25	16.997	160	0	22.949	460200	0	70	0			264
Q5T454;Q96T76;H7C0A9;F8WCH8;B0QZ77	MMS19 nucleotide excision repair protein homolog	MMS19	MMS19	tr|Q5T454|Q5T454_HUMAN MMS19 nucleotide excision repair protein (Fragment) OS=Homo sapiens OX=9606 GN=MMS19 PE=1 SV=2;sp|Q96T76|MMS19_HUMAN MMS19 nucleotide excision repair protein homolog OS=Homo sapiens OX=9606 GN=MMS19 PE=1 SV=2;tr|H7C0A9|H7C0A9_HUMAN M	Homo sapiens	5	2	2	11.6	33.616	302	0	14.117	457390	0	70	0			712
A0A087WTA5;E7ERK9;Q9UI10	Translation initiation factor eIF-2B subunit delta	EIF2B4	EIF2B4	tr|A0A087WTA5|A0A087WTA5_HUMAN Translation initiation factor eIF-2B subunit delta OS=Homo sapiens OX=9606 GN=EIF2B4 PE=1 SV=1;tr|E7ERK9|E7ERK9_HUMAN Translation initiation factor eIF-2B subunit delta OS=Homo sapiens OX=9606 GN=EIF2B4 PE=1 SV=1;sp|Q9UI10|EI	Homo sapiens	3	1	1	5	57.495	520	0	7.7001	456960	0	70	0			5
A6NJA2;P54578;J3QQT6;J3KS55	Ubiquitin carboxyl-terminal hydrolase;Ubiquitin carboxyl-terminal hydrolase 14	USP14	USP14	tr|A6NJA2|A6NJA2_HUMAN Ubiquitin carboxyl-terminal hydrolase OS=Homo sapiens OX=9606 GN=USP14 PE=1 SV=2;sp|P54578|UBP14_HUMAN Ubiquitin carboxyl-terminal hydrolase 14 OS=Homo sapiens OX=9606 GN=USP14 PE=1 SV=3;tr|J3QQT6|J3QQT6_HUMAN Ubiquitin carboxyl-term	Homo sapiens	4	2	2	5.4	51.086	448	0	31.042	450520	0	70	0			126
P62140;C9J9S3;C9JP48	Serine/threonine-protein phosphatase PP1-beta catalytic subunit;Serine/threonine-protein phosphatase	PPP1CB	PPP1CB	sp|P62140|PP1B_HUMAN Serine/threonine-protein phosphatase PP1-beta catalytic subunit OS=Homo sapiens OX=9606 GN=PPP1CB PE=1 SV=3;tr|C9J9S3|C9J9S3_HUMAN Serine/threonine-protein phosphatase (Fragment) OS=Homo sapiens OX=9606 GN=PPP1CB PE=1 SV=1;tr|C9JP48|C9	Homo sapiens	3	3	1	14.7	37.186	327	0	32.172	450410	0	70	0			602
P56192;H0YHL6;H0YI94;H0YI27;H0YIP0	Methionine--tRNA ligase, cytoplasmic	MARS	MARS	sp|P56192|SYMC_HUMAN Methionine--tRNA ligase, cytoplasmic OS=Homo sapiens OX=9606 GN=MARS1 PE=1 SV=2;tr|H0YHL6|H0YHL6_HUMAN Methionine--tRNA ligase, cytoplasmic (Fragment) OS=Homo sapiens OX=9606 GN=MARS1 PE=1 SV=1;tr|H0YI94|H0YI94_HUMAN Methionine--tRNA l	Homo sapiens	5	2	2	3.6	101.11	900	0	12.244	448980	0	70	0			587
P55084;F5GZQ3;C9K0M0;C9JEY0;C9JE81;B5MD38	Trifunctional enzyme subunit beta, mitochondrial;3-ketoacyl-CoA thiolase	HADHB	HADHB	sp|P55084|ECHB_HUMAN Trifunctional enzyme subunit beta, mitochondrial OS=Homo sapiens OX=9606 GN=HADHB PE=1 SV=3;tr|F5GZQ3|F5GZQ3_HUMAN Trifunctional enzyme subunit beta, mitochondrial OS=Homo sapiens OX=9606 GN=HADHB PE=1 SV=1	Homo sapiens	6	3	3	6.1	51.294	474	0	18.945	446370	0	70	0			585
Q12768;E7EQI7	WASH complex subunit strumpellin	KIAA0196	KIAA0196	sp|Q12768|WASC5_HUMAN WASH complex subunit 5 OS=Homo sapiens OX=9606 GN=WASHC5 PE=1 SV=1;tr|E7EQI7|E7EQI7_HUMAN WASH complex subunit 5 OS=Homo sapiens OX=9606 GN=WASHC5 PE=1 SV=1	Homo sapiens	2	3	3	3.1	134.28	1159	0	29.429	443480	0	70	0			656
lcl|NC_017825.1_prot_YP_006272954.1_6		polymerase	polymerase	lcl|NC_017825.1_prot_YP_006272954.1_6 [locus_tag=YOE_gp06] [db_xref=GeneID:12657140] [protein=polymerase] [protein_id=YP_006272954.1] [location=complement(join(5081..8662,13838..13846))] [gbkey=CDS]	AZ_Chimpanzee adenovirus Y25	1	3	3	3.6	135.45	1196	0	32.787	442360	0	70	0			346
C9JD14;C9JZN1;C9JIS1;H7C5J5;A0A6Q8PFW8;C9JXA5;A0A6Q8PFE0;A0A6Q8PFV8;Q9HAV0;P62879	Guanine nucleotide-binding protein subunit beta-4;Guanine nucleotide-binding protein G(I)/G(S)/G(T) subunit beta-2	GNB4;GNB2	GNB4	tr|C9JD14|C9JD14_HUMAN Guanine nucleotide-binding protein subunit beta-4 (Fragment) OS=Homo sapiens OX=9606 GN=GNB4 PE=1 SV=1;tr|C9JZN1|C9JZN1_HUMAN Guanine nucleotide-binding protein G(I)/G(S)/G(T) subunit beta-2 (Fragment) OS=Homo sapiens OX=9606 GN=GNB2	Homo sapiens	10	1	1	17.7	9.1033	79	0	19.231	435890	0	70	0			113
Q13033	Striatin-3	STRN3	STRN3	sp|Q13033|STRN3_HUMAN Striatin-3 OS=Homo sapiens OX=9606 GN=STRN3 PE=1 SV=3	Homo sapiens	1	2	2	3.3	87.208	797	0	29.207	431810	0	70	0			659
Q8WY54	Protein phosphatase 1E	PPM1E	PPM1E	sp|Q8WY54|PPM1E_HUMAN Protein phosphatase 1E OS=Homo sapiens OX=9606 GN=PPM1E PE=1 SV=3	Homo sapiens	1	3	3	6.5	83.951	755	0	67.083	427570	0	70	0			748
F2Z393;P37837	Transaldolase	TALDO1	TALDO1	tr|F2Z393|F2Z393_HUMAN Transaldolase OS=Homo sapiens OX=9606 GN=TALDO1 PE=1 SV=1;sp|P37837|TALDO_HUMAN Transaldolase OS=Homo sapiens OX=9606 GN=TALDO1 PE=1 SV=2	Homo sapiens	2	2	2	6.9	35.328	318	0	14.75	417500	0	70	0			250
A0A3B3IRQ8;A0A3B3ITF6;A0A3B3IRI2;P17812;A0A3B3ITB8;B4E1E0;A0A3B3ITH9	CTP synthase 1;CTP synthase	CTPS1	CTPS1	tr|A0A3B3IRQ8|A0A3B3IRQ8_HUMAN CTP synthase OS=Homo sapiens OX=9606 GN=CTPS1 PE=1 SV=1;tr|A0A3B3ITF6|A0A3B3ITF6_HUMAN CTP synthase OS=Homo sapiens OX=9606 GN=CTPS1 PE=1 SV=1;tr|A0A3B3IRI2|A0A3B3IRI2_HUMAN CTP synthase OS=Homo sapiens OX=9606 GN=CTPS1 PE=1	Homo sapiens	7	3	3	9.3	50.48	451	0	27.244	416020	0	70	0			87
H0YJS4;G3V4T5;P05198	Eukaryotic translation initiation factor 2 subunit 1	EIF2S1	EIF2S1	tr|H0YJS4|H0YJS4_HUMAN Eukaryotic translation initiation factor 2 subunit 1 (Fragment) OS=Homo sapiens OX=9606 GN=EIF2S1 PE=1 SV=1;tr|G3V4T5|G3V4T5_HUMAN Eukaryotic translation initiation factor 2 subunit 1 (Fragment) OS=Homo sapiens OX=9606 GN=EIF2S1 PE=1	Homo sapiens	3	2	2	6.3	28.865	252	0	11.317	415150	0	70	0			279
K7EJT5;K7EP65;K7EKS7;K7ELC4;K7EMH1;K7ERI7;P35268	60S ribosomal protein L22	RPL22	RPL22	tr|K7EJT5|K7EJT5_HUMAN 60S ribosomal protein L22 (Fragment) OS=Homo sapiens OX=9606 GN=RPL22 PE=1 SV=1;tr|K7EP65|K7EP65_HUMAN 60S ribosomal protein L22 (Fragment) OS=Homo sapiens OX=9606 GN=RPL22 PE=1 SV=1;tr|K7EKS7|K7EKS7_HUMAN Uncharacterized protein OS=	Homo sapiens	7	1	1	27.7	5.0827	47	0	7.8933	413510	0	70	0			335
Q9HAV4;H0Y9I3	Exportin-5	XPO5	XPO5	sp|Q9HAV4|XPO5_HUMAN Exportin-5 OS=Homo sapiens OX=9606 GN=XPO5 PE=1 SV=1	Homo sapiens	2	3	3	3.3	136.31	1204	0	29.615	412740	0	70	0			788
Q5VWZ2	Lysophospholipase-like protein 1	LYPLAL1	LYPLAL1	sp|Q5VWZ2|LYPL1_HUMAN Lysophospholipase-like protein 1 OS=Homo sapiens OX=9606 GN=LYPLAL1 PE=1 SV=3	Homo sapiens	1	1	1	4.2	26.316	237	0	8.2353	412490	0	70	0			716
H3BV85;Q9H3K6;H3BPT9;H3BTW0;A0A0B4J295;A0A087WZT3;H3BVE0	BolA-like protein 2	BOLA2B;BOLA2	BOLA2B	tr|H3BV85|H3BV85_HUMAN BolA-like protein 2 OS=Homo sapiens OX=9606 GN=BOLA2B PE=1 SV=2;sp|Q9H3K6|BOLA2_HUMAN BolA-like protein 2 OS=Homo sapiens OX=9606 GN=BOLA2 PE=1 SV=1;tr|H3BPT9|H3BPT9_HUMAN BolA-like protein 2 OS=Homo sapiens OX=9606 GN=BOLA2B PE=1 SV	Homo sapiens	7	2	2	46.3	6.3612	54	0	16.017	411330	0	70	0			309
P05121	Plasminogen activator inhibitor 1	SERPINE1	SERPINE1	sp|P05121|PAI1_HUMAN Plasminogen activator inhibitor 1 OS=Homo sapiens OX=9606 GN=SERPINE1 PE=1 SV=1	Homo sapiens	1	1	1	3.2	45.059	402	1	-2	410790	0	70	0	+		431
A0A286YEV0				tr|A0A286YEV0|A0A286YEV0_HUMAN Protein FAM240A OS=Homo sapiens OX=9606 GN=FAM240A PE=4 SV=1	Homo sapiens	1	1	1	7.9	11.063	89	1	-2	408750	0	70	0	+		71
E5RGQ3;Q9H446	RWD domain-containing protein 1	RWDD1	RWDD1	tr|E5RGQ3|E5RGQ3_HUMAN RWD domain-containing protein 1 (Fragment) OS=Homo sapiens OX=9606 GN=RWDD1 PE=1 SV=1;sp|Q9H446|RWDD1_HUMAN RWD domain-containing protein 1 OS=Homo sapiens OX=9606 GN=RWDD1 PE=1 SV=1	Homo sapiens	2	3	3	16.7	8.5618	72	0	24.522	407490	0	70	0			215
H0YJH9;B4DEH8;G3V4T2;Q86U42	Polyadenylate-binding protein 2	PABPN1	PABPN1	tr|H0YJH9|H0YJH9_HUMAN Polyadenylate-binding protein 2 (Fragment) OS=Homo sapiens OX=9606 GN=PABPN1 PE=1 SV=1;tr|B4DEH8|B4DEH8_HUMAN Polyadenylate-binding protein 2 OS=Homo sapiens OX=9606 GN=PABPN1 PE=1 SV=1;tr|G3V4T2|G3V4T2_HUMAN Polyadenylate-binding pr	Homo sapiens	4	1	1	11.5	10.971	96	0	22.803	406330	0	70	0			145
A0A2R8Y623;B5MCP9;P62081	40S ribosomal protein S7	RPS7	RPS7	tr|A0A2R8Y623|A0A2R8Y623_HUMAN 40S ribosomal protein S7 (Fragment) OS=Homo sapiens OX=9606 GN=RPS7 PE=1 SV=1;tr|B5MCP9|B5MCP9_HUMAN 40S ribosomal protein S7 OS=Homo sapiens OX=9606 GN=RPS7 PE=1 SV=1;sp|P62081|RS7_HUMAN 40S ribosomal protein S7 OS=Homo sapi	Homo sapiens	3	1	1	4.7	19.405	169	0.0027586	6.291	404260	0	70	0			78
Q15645;H0YAL2	Pachytene checkpoint protein 2 homolog	TRIP13	TRIP13	sp|Q15645|PCH2_HUMAN Pachytene checkpoint protein 2 homolog OS=Homo sapiens OX=9606 GN=TRIP13 PE=1 SV=2;tr|H0YAL2|H0YAL2_HUMAN Pachytene checkpoint protein 2 homolog (Fragment) OS=Homo sapiens OX=9606 GN=TRIP13 PE=1 SV=1	Homo sapiens	2	2	2	5.3	48.55	432	0	23.487	402980	0	70	0			692
A2A3R5;P62753	40S ribosomal protein S6	RPS6	RPS6	tr|A2A3R5|A2A3R5_HUMAN 40S ribosomal protein S6 OS=Homo sapiens OX=9606 GN=RPS6 PE=1 SV=1;sp|P62753|RS6_HUMAN 40S ribosomal protein S6 OS=Homo sapiens OX=9606 GN=RPS6 PE=1 SV=1	Homo sapiens	2	1	1	5.5	24.968	218	0	8.9387	396180	0	70	0			121
P29083;C9IYL4;C9J329;E9PER7	General transcription factor IIE subunit 1	GTF2E1	GTF2E1	sp|P29083|T2EA_HUMAN General transcription factor IIE subunit 1 OS=Homo sapiens OX=9606 GN=GTF2E1 PE=1 SV=2;tr|C9IYL4|C9IYL4_HUMAN General transcription factor IIE subunit 1 (Fragment) OS=Homo sapiens OX=9606 GN=GTF2E1 PE=1 SV=1	Homo sapiens	4	3	3	11.6	49.452	439	0	46.581	394310	0	70	0			520
J3QR61;A0A2R8Y765;J3QKS7;A0A2R8Y7U4;A0A2U3TZQ7;A0A2R8Y7I9;A0A2R8Y4T4;A0A2R8YES3;A0A2R8Y855;B4DGM3;Q969G3;J3KT85;A0A2R8YD78	SWI/SNF-related matrix-associated actin-dependent regulator of chromatin subfamily E member 1	SMARCE1	SMARCE1	tr|J3QR61|J3QR61_HUMAN SWI/SNF-related matrix-associated actin-dependent regulator of chromatin subfamily E member 1 (Fragment) OS=Homo sapiens OX=9606 GN=SMARCE1 PE=1 SV=2;tr|A0A2R8Y765|A0A2R8Y765_HUMAN SWI/SNF-related matrix-associated actin-dependent re	Homo sapiens	13	2	2	10.4	30.006	259	0	13.245	386520	0	70	0			76
Q9H2M9	Rab3 GTPase-activating protein non-catalytic subunit	RAB3GAP2	RAB3GAP2	sp|Q9H2M9|RBGPR_HUMAN Rab3 GTPase-activating protein non-catalytic subunit OS=Homo sapiens OX=9606 GN=RAB3GAP2 PE=1 SV=1	Homo sapiens	1	3	3	3.3	155.98	1393	0	16.388	385790	0	70	0			785
Q9BS26	Endoplasmic reticulum resident protein 44	ERP44	ERP44	sp|Q9BS26|ERP44_HUMAN Endoplasmic reticulum resident protein 44 OS=Homo sapiens OX=9606 GN=ERP44 PE=1 SV=1	Homo sapiens	1	2	2	5.9	46.971	406	0	16.372	378940	0	70	0			772
P30041	Peroxiredoxin-6	PRDX6	PRDX6	sp|P30041|PRDX6_HUMAN Peroxiredoxin-6 OS=Homo sapiens OX=9606 GN=PRDX6 PE=1 SV=3	Homo sapiens	1	2	2	9.8	25.035	224	0	11.584	378410	0	70	0			521
Q96MX6;Q8ND98	WD repeat-containing protein 92	WDR92;DKFZp434B156	WDR92	sp|Q96MX6|WDR92_HUMAN WD repeat-containing protein 92 OS=Homo sapiens OX=9606 GN=WDR92 PE=1 SV=1;tr|Q8ND98|Q8ND98_HUMAN WD repeat-containing protein 92 OS=Homo sapiens OX=9606 GN=WDR92 PE=1 SV=1	Homo sapiens	2	2	2	11.8	39.74	357	0	20.177	374320	0	70	0			760
D6RDA2;H0Y8X0;B4DFG0;H0Y993;A0A494C028;P35659	Protein DEK	DEK	DEK	tr|D6RDA2|D6RDA2_HUMAN Protein DEK (Fragment) OS=Homo sapiens OX=9606 GN=DEK PE=1 SV=1;tr|H0Y8X0|H0Y8X0_HUMAN Protein DEK OS=Homo sapiens OX=9606 GN=DEK PE=1 SV=2;tr|B4DFG0|B4DFG0_HUMAN Protein DEK OS=Homo sapiens OX=9606 GN=DEK PE=1 SV=1;tr|H0Y993|H0Y993_	Homo sapiens	6	2	2	18	14.156	122	0	16.588	371370	0	70	0			95
C9JJ34;C9JDM3;F6WQW2;P43487	Ran-specific GTPase-activating protein	RANBP1	RANBP1	tr|C9JJ34|C9JJ34_HUMAN Ran-specific GTPase-activating protein (Fragment) OS=Homo sapiens OX=9606 GN=RANBP1 PE=1 SV=1;tr|C9JDM3|C9JDM3_HUMAN Ran-specific GTPase-activating protein (Fragment) OS=Homo sapiens OX=9606 GN=RANBP1 PE=1 SV=8;tr|F6WQW2|F6WQW2_HUMAN	Homo sapiens	4	1	1	6.7	18.762	163	0	15.976	370190	0	70	0			171
Q12931	Heat shock protein 75 kDa, mitochondrial	TRAP1	TRAP1	sp|Q12931|TRAP1_HUMAN Heat shock protein 75 kDa, mitochondrial OS=Homo sapiens OX=9606 GN=TRAP1 PE=1 SV=3	Homo sapiens	1	1	1	1.7	80.109	704	0	8.6577	367720	0	70	0			657
A0A2R8Y4F5;H0YFD6;P40939;A0A2R8YG21	Trifunctional enzyme subunit alpha, mitochondrial;Long-chain enoyl-CoA hydratase;Long chain 3-hydroxyacyl-CoA dehydrogenase	HADHA	HADHA	tr|A0A2R8Y4F5|A0A2R8Y4F5_HUMAN Enoyl-CoA hydratase OS=Homo sapiens OX=9606 GN=HADHA PE=1 SV=1;tr|H0YFD6|H0YFD6_HUMAN Enoyl-CoA hydratase OS=Homo sapiens OX=9606 GN=HADHA PE=1 SV=2;sp|P40939|ECHA_HUMAN Trifunctional enzyme subunit alpha, mitochondrial OS=Ho	Homo sapiens	4	3	3	7.6	79.466	728	0	63.897	361600	0	70	0			75
B1AK87;B1AK88;P47756	F-actin-capping protein subunit beta	CAPZB	CAPZB	tr|B1AK87|B1AK87_HUMAN F-actin-capping protein subunit beta OS=Homo sapiens OX=9606 GN=CAPZB PE=1 SV=2;tr|B1AK88|B1AK88_HUMAN F-actin-capping protein subunit beta OS=Homo sapiens OX=9606 GN=CAPZB PE=1 SV=1;sp|P47756|CAPZB_HUMAN F-actin-capping protein subu	Homo sapiens	3	1	1	4.1	27.44	244	0	28.898	357010	0	70	0			135
Q5T1M5	FK506-binding protein 15	FKBP15	FKBP15	sp|Q5T1M5|FKB15_HUMAN FK506-binding protein 15 OS=Homo sapiens OX=9606 GN=FKBP15 PE=1 SV=2	Homo sapiens	1	2	2	2.9	133.63	1219	0	164.05	353240	0	70	0			711
P25685;M0R080	DnaJ homolog subfamily B member 1	DNAJB1	DNAJB1	sp|P25685|DNJB1_HUMAN DnaJ homolog subfamily B member 1 OS=Homo sapiens OX=9606 GN=DNAJB1 PE=1 SV=4;tr|M0R080|M0R080_HUMAN DnaJ homolog subfamily B member 1 (Fragment) OS=Homo sapiens OX=9606 GN=DNAJB1 PE=1 SV=1	Homo sapiens	2	2	2	7.9	38.044	340	0	11.648	352150	0	70	0			504
H0YGJ7;H0YLP3;O75822	Eukaryotic translation initiation factor 3 subunit J	EIF3J	EIF3J	tr|H0YGJ7|H0YGJ7_HUMAN Eukaryotic translation initiation factor 3 30 kDa subunit (Fragment) OS=Homo sapiens OX=9606 GN=EIF3J PE=1 SV=1;tr|H0YLP3|H0YLP3_HUMAN Eukaryotic translation initiation factor 3 30 kDa subunit (Fragment) OS=Homo sapiens OX=9606 GN=EI	Homo sapiens	3	2	2	18.9	11.959	106	0	29.21	350800	0	70	0			293
Q09666	Neuroblast differentiation-associated protein AHNAK	AHNAK	AHNAK	sp|Q09666|AHNK_HUMAN Neuroblast differentiation-associated protein AHNAK OS=Homo sapiens OX=9606 GN=AHNAK PE=1 SV=2	Homo sapiens	1	1	1	0.3	629.09	5890	0.0014451	6.5162	332280	0	70	0			652
J3QR71;J3QRI9;J3QKW7;A8MZF9;P55039;J3QL90;J3KRL5;J3QKV7	Developmentally-regulated GTP-binding protein 2	DRG2	DRG2	tr|J3QR71|J3QR71_HUMAN Developmentally-regulated GTP-binding protein 2 (Fragment) OS=Homo sapiens OX=9606 GN=DRG2 PE=1 SV=1;tr|J3QRI9|J3QRI9_HUMAN Developmentally-regulated GTP-binding protein 2 OS=Homo sapiens OX=9606 GN=DRG2 PE=1 SV=1;tr|J3QKW7|J3QKW7_HU	Homo sapiens	8	2	2	19.6	16.906	158	0	12.626	331300	0	70	0			132
Q92900	Regulator of nonsense transcripts 1	UPF1	UPF1	sp|Q92900|RENT1_HUMAN Regulator of nonsense transcripts 1 OS=Homo sapiens OX=9606 GN=UPF1 PE=1 SV=2	Homo sapiens	1	2	2	1.7	124.34	1129	0	12.06	329960	0	70	0			751
H7C3S9;E9PGT6;Q99627	COP9 signalosome complex subunit 8	COPS8	COPS8	tr|H7C3S9|H7C3S9_HUMAN COP9 signalosome complex subunit 8 (Fragment) OS=Homo sapiens OX=9606 GN=COPS8 PE=1 SV=1;tr|E9PGT6|E9PGT6_HUMAN COP9 signalosome complex subunit 8 OS=Homo sapiens OX=9606 GN=COPS8 PE=1 SV=1;sp|Q99627|CSN8_HUMAN COP9 signalosome compl	Homo sapiens	3	1	1	15.7	8.9341	83	0	12.673	326280	0	70	0			236
F8WBS5;F8WB72;C9K025;P18077	60S ribosomal protein L35a	RPL35A	RPL35A	tr|F8WBS5|F8WBS5_HUMAN 60S ribosomal protein L35a OS=Homo sapiens OX=9606 GN=RPL35A PE=1 SV=1;tr|F8WB72|F8WB72_HUMAN 60S ribosomal protein L35a OS=Homo sapiens OX=9606 GN=RPL35A PE=1 SV=1;tr|C9K025|C9K025_HUMAN 60S ribosomal protein L35a (Fragment) OS=Homo	Homo sapiens	4	2	2	32.7	6.4725	55	0	11.806	325690	0	70	0			180
K7EJC1;K7EJR3;R4GMR5;P48556;K7ERW6	26S proteasome non-ATPase regulatory subunit 8	PSMD8	PSMD8	tr|K7EJC1|K7EJC1_HUMAN 26S proteasome non-ATPase regulatory subunit 8 OS=Homo sapiens OX=9606 GN=PSMD8 PE=1 SV=1;tr|K7EJR3|K7EJR3_HUMAN 26S proteasome non-ATPase regulatory subunit 8 (Fragment) OS=Homo sapiens OX=9606 GN=PSMD8 PE=1 SV=8;tr|R4GMR5|R4GMR5_HU	Homo sapiens	5	2	2	9.9	19.781	172	0	13.253	323550	0	70	0			333
P19525	Interferon-induced, double-stranded RNA-activated protein kinase	EIF2AK2	EIF2AK2	sp|P19525|E2AK2_HUMAN Interferon-induced, double-stranded RNA-activated protein kinase OS=Homo sapiens OX=9606 GN=EIF2AK2 PE=1 SV=2	Homo sapiens	1	1	1	2.2	62.094	551	0	16.845	316040	0	70	0			486
H3BQX5;E9PKR8;E9PM76;E9PKW4;H3BRY5;P50226;P50225	Sulfotransferase;Sulfotransferase 1A2;Sulfotransferase 1A1	SULT1A1;SULT1A2	SULT1A1	tr|H3BQX5|H3BQX5_HUMAN Sulfotransferase (Fragment) OS=Homo sapiens OX=9606 GN=SULT1A1 PE=1 SV=8;tr|E9PKR8|E9PKR8_HUMAN Sulfotransferase (Fragment) OS=Homo sapiens OX=9606 GN=SULT1A2 PE=1 SV=1;tr|E9PM76|E9PM76_HUMAN Sulfotransferase OS=Homo sapiens OX=9606	Homo sapiens	7	1	1	15.4	19.787	169	0	6.7526	315390	0	70	0			245
P07196	Neurofilament light polypeptide	NEFL	NEFL	sp|P07196|NFL_HUMAN Neurofilament light polypeptide OS=Homo sapiens OX=9606 GN=NEFL PE=1 SV=3	Homo sapiens	1	5	4	9.9	61.516	543	0	32.648	313310	0	70	0			437
P51991	Heterogeneous nuclear ribonucleoprotein A3	HNRNPA3	HNRNPA3	sp|P51991|ROA3_HUMAN Heterogeneous nuclear ribonucleoprotein A3 OS=Homo sapiens OX=9606 GN=HNRNPA3 PE=1 SV=2	Homo sapiens	1	1	1	3.4	39.594	378	0	32.709	307860	0	70	0			571
A0A087X2D0;P84103	Serine/arginine-rich splicing factor 3	SRSF3	SRSF3	tr|A0A087X2D0|A0A087X2D0_HUMAN Serine/arginine-rich-splicing factor 3 OS=Homo sapiens OX=9606 GN=SRSF3 PE=1 SV=1;sp|P84103|SRSF3_HUMAN Serine/arginine-rich splicing factor 3 OS=Homo sapiens OX=9606 GN=SRSF3 PE=1 SV=1	Homo sapiens	2	1	1	9.5	10.32	95	0	6.8615	306720	0	70	0			31
P26639	Threonine--tRNA ligase, cytoplasmic	TARS	TARS	sp|P26639|SYTC_HUMAN Threonine--tRNA ligase 1, cytoplasmic OS=Homo sapiens OX=9606 GN=TARS1 PE=1 SV=3	Homo sapiens	1	1	1	1.9	83.434	723	0	7.1253	302060	0	70	0			509
O95197	Reticulon-3	RTN3	RTN3	sp|O95197|RTN3_HUMAN Reticulon-3 OS=Homo sapiens OX=9606 GN=RTN3 PE=1 SV=2	Homo sapiens	1	1	1	1.1	112.61	1032	0	7.2962	300550	0	70	0			415
E9PEM5;A0A494C1L5;P50851;H0YAC6;A0A494BZW2;A0A494C0R9;Q5T321;A0A0D9SF28;F5GXV7;Q8NFP9	Lipopolysaccharide-responsive and beige-like anchor protein	LRBA	LRBA	tr|E9PEM5|E9PEM5_HUMAN Lipopolysaccharide-responsive and beige-like anchor protein OS=Homo sapiens OX=9606 GN=LRBA PE=1 SV=1;tr|A0A494C1L5|A0A494C1L5_HUMAN Lipopolysaccharide-responsive and beige-like anchor protein OS=Homo sapiens OX=9606 GN=LRBA PE=1 SV=	Homo sapiens	10	4	4	1.9	286.97	2575	0	38.106	300390	0	70	0			98
P62937;E5RIZ5;F8WE65;C9J5S7	Peptidyl-prolyl cis-trans isomerase A;Peptidyl-prolyl cis-trans isomerase A, N-terminally processed	PPIA	PPIA	sp|P62937|PPIA_HUMAN Peptidyl-prolyl cis-trans isomerase A OS=Homo sapiens OX=9606 GN=PPIA PE=1 SV=2	Homo sapiens	4	3	3	17.6	18.012	165	0	27.741	297480	0	70	0			618
A0A1B0GV93;Q53GQ0	Very-long-chain 3-oxoacyl-CoA reductase	HSD17B12	HSD17B12	tr|A0A1B0GV93|A0A1B0GV93_HUMAN Very-long-chain 3-oxoacyl-CoA reductase OS=Homo sapiens OX=9606 GN=HSD17B12 PE=1 SV=1;sp|Q53GQ0|DHB12_HUMAN Very-long-chain 3-oxoacyl-CoA reductase OS=Homo sapiens OX=9606 GN=HSD17B12 PE=1 SV=2	Homo sapiens	2	1	1	5.4	30.361	276	0	11.167	295570	0	70	0			64
V9GYZ6;P07814	Bifunctional glutamate/proline--tRNA ligase;Glutamate--tRNA ligase;Proline--tRNA ligase	EPRS	EPRS	tr|V9GYZ6|V9GYZ6_HUMAN Glutamyl-tRNA synthetase (Fragment) OS=Homo sapiens OX=9606 GN=EPRS1 PE=1 SV=1;sp|P07814|SYEP_HUMAN Bifunctional glutamate/proline--tRNA ligase OS=Homo sapiens OX=9606 GN=EPRS1 PE=1 SV=5	Homo sapiens	2	2	2	2.4	109.04	968	0	20.358	293380	0	70	0			441
K7ENH2;K9J957;P61289;K7EMD0;K7EPX6;K7EKR3;B7Z8D3;A0A087WTV2;B3KQ25;K7ESG5	Proteasome activator complex subunit 3	PSME3	PSME3	tr|K7ENH2|K7ENH2_HUMAN Proteasome activator complex subunit 3 (Fragment) OS=Homo sapiens OX=9606 GN=PSME3 PE=1 SV=1;tr|K9J957|K9J957_HUMAN Proteasome activator complex subunit 3 OS=Homo sapiens OX=9606 GN=PSME3 PE=1 SV=1;sp|P61289|PSME3_HUMAN Proteasome ac	Homo sapiens	10	2	2	14.5	20.593	179	0	18.853	292530	0	70	0			341
C9J712;C9J0J7;C9JQ45;G5E9Q6;P35080	Profilin;Profilin-2	PFN2	PFN2	tr|C9J712|C9J712_HUMAN Profilin OS=Homo sapiens OX=9606 GN=PFN2 PE=1 SV=1;tr|C9J0J7|C9J0J7_HUMAN Profilin OS=Homo sapiens OX=9606 GN=PFN2 PE=1 SV=1;tr|C9JQ45|C9JQ45_HUMAN Profilin OS=Homo sapiens OX=9606 GN=PFN2 PE=1 SV=1;tr|G5E9Q6|G5E9Q6_HUMAN Profilin OS	Homo sapiens	5	1	1	15.4	9.7982	91	0	8.1759	288770	0	70	0			166
Q92973	Transportin-1	TNPO1	TNPO1	sp|Q92973|TNPO1_HUMAN Transportin-1 OS=Homo sapiens OX=9606 GN=TNPO1 PE=1 SV=2	Homo sapiens	1	2	2	3.2	102.35	898	0	13.666	284820	0	70	0			753
Q8IX12;A0A0C4DGG8	Cell division cycle and apoptosis regulator protein 1	CCAR1	CCAR1	sp|Q8IX12|CCAR1_HUMAN Cell division cycle and apoptosis regulator protein 1 OS=Homo sapiens OX=9606 GN=CCAR1 PE=1 SV=2;tr|A0A0C4DGG8|A0A0C4DGG8_HUMAN Cell division cycle and apoptosis regulator protein 1 (Fragment) OS=Homo sapiens OX=9606 GN=CCAR1 PE=1 SV=	Homo sapiens	2	2	2	1.7	132.82	1150	0	13.322	282490	0	70	0			734
J3KN67;A0A2R2Y2Q3;P06753;A0A494C0P6;A0A494C034	Tropomyosin alpha-3 chain	TPM3	TPM3	tr|J3KN67|J3KN67_HUMAN Tropomyosin alpha-3 chain OS=Homo sapiens OX=9606 GN=TPM3 PE=1 SV=1;tr|A0A2R2Y2Q3|A0A2R2Y2Q3_HUMAN Tropomyosin 3 nu OS=Homo sapiens OX=9606 GN=TPM3 PE=1 SV=1;sp|P06753|TPM3_HUMAN Tropomyosin alpha-3 chain OS=Homo sapiens OX=9606 GN=T	Homo sapiens	5	13	3	35.4	33.222	285	0	17.189	281430	0	70	0			320
O14617;A0A087WYN6;A0A2R8Y4J3;A0A2R8Y611	AP-3 complex subunit delta-1	AP3D1	AP3D1	sp|O14617|AP3D1_HUMAN AP-3 complex subunit delta-1 OS=Homo sapiens OX=9606 GN=AP3D1 PE=1 SV=1;tr|A0A087WYN6|A0A087WYN6_HUMAN AP-3 complex subunit delta (Fragment) OS=Homo sapiens OX=9606 GN=AP3D1 PE=1 SV=1;tr|A0A2R8Y4J3|A0A2R8Y4J3_HUMAN AP-3 complex subuni	Homo sapiens	4	2	2	2.3	130.16	1153	0	13.047	279740	0	70	0			382
Q96K76	Ubiquitin carboxyl-terminal hydrolase 47	USP47	USP47	sp|Q96K76|UBP47_HUMAN Ubiquitin carboxyl-terminal hydrolase 47 OS=Homo sapiens OX=9606 GN=USP47 PE=1 SV=3	Homo sapiens	1	3	3	2.9	157.31	1375	0	16.674	277730	0	70	0			759
F5GYN4;J3KR44;F5GYJ8;Q96FW1;F5H3F0;F5H6Q1	Ubiquitin thioesterase OTUB1	OTUB1	OTUB1	tr|F5GYN4|F5GYN4_HUMAN Ubiquitinyl hydrolase 1 OS=Homo sapiens OX=9606 GN=OTUB1 PE=1 SV=1;tr|J3KR44|J3KR44_HUMAN Ubiquitin thioesterase OS=Homo sapiens OX=9606 GN=OTUB1 PE=1 SV=2;tr|F5GYJ8|F5GYJ8_HUMAN Ubiquitinyl hydrolase 1 OS=Homo sapiens OX=9606 GN=OTU	Homo sapiens	6	2	2	10	28.05	241	0	13.088	275390	0	70	0			255
Q15291	Retinoblastoma-binding protein 5	RBBP5	RBBP5	sp|Q15291|RBBP5_HUMAN Retinoblastoma-binding protein 5 OS=Homo sapiens OX=9606 GN=RBBP5 PE=1 SV=2	Homo sapiens	1	2	2	3.7	59.152	538	0	14.674	269330	0	70	0			689
F8VXI7;F8VXL2;F8VRV5;P63167	Dynein light chain 1, cytoplasmic	DYNLL1	DYNLL1	tr|F8VXI7|F8VXI7_HUMAN Dynein light chain (Fragment) OS=Homo sapiens OX=9606 GN=DYNLL1 PE=1 SV=1;tr|F8VXL2|F8VXL2_HUMAN Dynein light chain OS=Homo sapiens OX=9606 GN=DYNLL1 PE=1 SV=1;tr|F8VRV5|F8VRV5_HUMAN Dynein light chain OS=Homo sapiens OX=9606 GN=DYNL	Homo sapiens	4	1	1	52.4	4.7714	42	0	23.589	267950	0	70	0			262
M0R076;M0QYT0;M0QXS5;A0A3B3ITJ4;P14866	Heterogeneous nuclear ribonucleoprotein L	HNRNPL	HNRNPL	tr|M0R076|M0R076_HUMAN Uncharacterized protein (Fragment) OS=Homo sapiens OX=9606 PE=1 SV=1;tr|M0QYT0|M0QYT0_HUMAN RRM domain-containing protein (Fragment) OS=Homo sapiens OX=9606 PE=1 SV=1;tr|M0QXS5|M0QXS5_HUMAN Heterogeneous nuclear ribonucleoprotein L (	Homo sapiens	5	1	1	11.4	12.953	114	0	12.299	265620	0	70	0			91
Q8N475	Follistatin-related protein 5	FSTL5	FSTL5	sp|Q8N475|FSTL5_HUMAN Follistatin-related protein 5 OS=Homo sapiens OX=9606 GN=FSTL5 PE=2 SV=2	Homo sapiens	1	1	1	2	95.75	847	1	-2	264870	0	70	0	+		739
P30520	Adenylosuccinate synthetase isozyme 2	ADSS	ADSS	sp|P30520|PURA2_HUMAN Adenylosuccinate synthetase isozyme 2 OS=Homo sapiens OX=9606 GN=ADSS2 PE=1 SV=3	Homo sapiens	1	1	1	2.4	50.097	456	0.0027778	6.344	264470	0	70	0			523
G3V279;P84090	Enhancer of rudimentary homolog	ERH	ERH	tr|G3V279|G3V279_HUMAN Enhancer of rudimentary homolog OS=Homo sapiens OX=9606 GN=ERH PE=1 SV=1;sp|P84090|ERH_HUMAN Enhancer of rudimentary homolog OS=Homo sapiens OX=9606 GN=ERH PE=1 SV=1	Homo sapiens	2	1	1	15.5	8.2033	71	0	16.059	263740	0	70	0			275
O43143	Pre-mRNA-splicing factor ATP-dependent RNA helicase DHX15	DHX15	DHX15	sp|O43143|DHX15_HUMAN Pre-mRNA-splicing factor ATP-dependent RNA helicase DHX15 OS=Homo sapiens OX=9606 GN=DHX15 PE=1 SV=2	Homo sapiens	1	3	3	4.5	90.932	795	0	54.725	261280	0	70	0			394
E9PIX3		CAPN11	CAPN11	tr|E9PIX3|E9PIX3_HUMAN Calpain-11 OS=Homo sapiens OX=9606 GN=CAPN11 PE=4 SV=1	Homo sapiens	1	1	1	50	4.1167	40	1	-2	258530	0	70	0	+		240
A0A087X1I3;D6RFM5;P31040;H0Y8X1;A0A494C1T6	Succinate dehydrogenase [ubiquinone] flavoprotein subunit, mitochondrial	SDHA	SDHA	tr|A0A087X1I3|A0A087X1I3_HUMAN Flavoprotein subunit of complex II OS=Homo sapiens OX=9606 GN=SDHA PE=1 SV=1;tr|D6RFM5|D6RFM5_HUMAN Succinate dehydrogenase [ubiquinone] flavoprotein subunit, mitochondrial OS=Homo sapiens OX=9606 GN=SDHA PE=1 SV=1;sp|P31040|	Homo sapiens	5	2	2	8.3	56.662	519	0	13.153	256610	0	70	0			29
A0A6Q8PHG0;O43390;A0A6Q8PH31;A0A6Q8PH35;B4DT28	Heterogeneous nuclear ribonucleoprotein R	HNRNPR	HNRNPR	tr|A0A6Q8PHG0|A0A6Q8PHG0_HUMAN Heterogeneous nuclear ribonucleoprotein R (Fragment) OS=Homo sapiens OX=9606 GN=HNRNPR PE=1 SV=1;sp|O43390|HNRPR_HUMAN Heterogeneous nuclear ribonucleoprotein R OS=Homo sapiens OX=9606 GN=HNRNPR PE=1 SV=1;tr|A0A6Q8PH31|A0A6Q8	Homo sapiens	5	2	1	13.4	20.873	186	0	42.084	255370	0	70	0			120
E9PJ21;A0A087WWI4;K7EQK2;A0A087X054;A0A494C039;Q9Y4L1	Hypoxia up-regulated protein 1	HYOU1	HYOU1	tr|E9PJ21|E9PJ21_HUMAN Hypoxia up-regulated protein 1 (Fragment) OS=Homo sapiens OX=9606 GN=HYOU1 PE=1 SV=1;tr|A0A087WWI4|A0A087WWI4_HUMAN Hypoxia up-regulated protein 1 OS=Homo sapiens OX=9606 GN=HYOU1 PE=1 SV=1;tr|K7EQK2|K7EQK2_HUMAN Hypoxia up-regulated	Homo sapiens	6	2	2	3.4	72.976	656	0	14.931	248280	0	70	0			19
P45954	Short/branched chain specific acyl-CoA dehydrogenase, mitochondrial	ACADSB	ACADSB	sp|P45954|ACDSB_HUMAN Short/branched chain specific acyl-CoA dehydrogenase, mitochondrial OS=Homo sapiens OX=9606 GN=ACADSB PE=1 SV=1	Homo sapiens	1	1	1	1.9	47.485	432	0.0028209	6.3913	247780	0	70	0			551
K7EM73;K7ELJ7;A0A0C4DGQ5;P04632;K7ES78;K7EMQ1;K7EIV0;A0A075B7C0;K7EKD8	Calpain small subunit 1	CAPNS1	CAPNS1	tr|K7EM73|K7EM73_HUMAN Calcium-activated neutral proteinase small subunit (Fragment) OS=Homo sapiens OX=9606 GN=CAPNS1 PE=1 SV=1;tr|K7ELJ7|K7ELJ7_HUMAN Calcium-activated neutral proteinase small subunit OS=Homo sapiens OX=9606 GN=CAPNS1 PE=1 SV=1;tr|A0A0C4	Homo sapiens	9	2	2	20.2	15.958	163	0	14.541	237190	0	70	0			52
A0A5K1VW72;J3QRD1;A0A5F9ZI12;A0A5F9ZHI5;A0A5F9ZGX4;A0A5F9ZHN9;P51648;I3L2W1;A0A0D9SGC3;J3QS00;I3L1M4;A0A5F9ZHP6	Fatty aldehyde dehydrogenase	ALDH3A2	ALDH3A2	tr|A0A5K1VW72|A0A5K1VW72_HUMAN Aldehyde dehydrogenase family 3 member A2 OS=Homo sapiens OX=9606 GN=ALDH3A2 PE=1 SV=1;tr|J3QRD1|J3QRD1_HUMAN Aldehyde dehydrogenase family 3 member A2 OS=Homo sapiens OX=9606 GN=ALDH3A2 PE=1 SV=1;tr|A0A5F9ZI12|A0A5F9ZI12_HUM	Homo sapiens	12	3	3	9	42.594	376	0	24.44	235550	0	70	0			105
A0A087WUB9;Q8WYA6	Beta-catenin-like protein 1	CTNNBL1	CTNNBL1	tr|A0A087WUB9|A0A087WUB9_HUMAN Beta-catenin-like protein 1 OS=Homo sapiens OX=9606 GN=CTNNBL1 PE=1 SV=1;sp|Q8WYA6|CTBL1_HUMAN Beta-catenin-like protein 1 OS=Homo sapiens OX=9606 GN=CTNNBL1 PE=1 SV=1	Homo sapiens	2	1	1	1.4	65.702	568	0.005277	6.0298	234280	0	70	0			10
O75074	Low-density lipoprotein receptor-related protein 3	LRP3	LRP3	sp|O75074|LRP3_HUMAN Low-density lipoprotein receptor-related protein 3 OS=Homo sapiens OX=9606 GN=LRP3 PE=2 SV=2	Homo sapiens	1	1	1	2.1	82.883	770	1	-2	233340	0	70	0	+		407
F8WDR7;B4DXW1;P61158	Actin-related protein 3	ACTR3	ACTR3	tr|F8WDR7|F8WDR7_HUMAN Actin-like protein 3 (Fragment) OS=Homo sapiens OX=9606 GN=ACTR3 PE=1 SV=2;tr|B4DXW1|B4DXW1_HUMAN Actin-like protein 3 OS=Homo sapiens OX=9606 GN=ACTR3 PE=1 SV=1;sp|P61158|ARP3_HUMAN Actin-related protein 3 OS=Homo sapiens OX=9606 GN	Homo sapiens	3	1	1	26.2	10.121	84	0.0053191	6.0741	233090	0	70	0			149
H3BTA2;P60510;H3BV22;I3L4X0;E5RFI3;E5RHP4;E7ESG8;E5RHC1	Serine/threonine-protein phosphatase;Serine/threonine-protein phosphatase 4 catalytic subunit	PPP4C	PPP4C	tr|H3BTA2|H3BTA2_HUMAN Serine/threonine-protein phosphatase (Fragment) OS=Homo sapiens OX=9606 GN=PPP4C PE=1 SV=1;sp|P60510|PP4C_HUMAN Serine/threonine-protein phosphatase 4 catalytic subunit OS=Homo sapiens OX=9606 GN=PPP4C PE=1 SV=1;tr|H3BV22|H3BV22_HUMA	Homo sapiens	8	3	2	14.2	30.561	267	0	36.704	232930	0	70	0			308
Q9UNE7;H3BS86	E3 ubiquitin-protein ligase CHIP	STUB1	STUB1	sp|Q9UNE7|CHIP_HUMAN E3 ubiquitin-protein ligase CHIP OS=Homo sapiens OX=9606 GN=STUB1 PE=1 SV=2;tr|H3BS86|H3BS86_HUMAN E3 ubiquitin-protein ligase CHIP (Fragment) OS=Homo sapiens OX=9606 GN=STUB1 PE=1 SV=8	Homo sapiens	2	2	2	6.9	34.856	303	0	14.308	232650	0	70	0			809
P61081	NEDD8-conjugating enzyme Ubc12	UBE2M	UBE2M	sp|P61081|UBC12_HUMAN NEDD8-conjugating enzyme Ubc12 OS=Homo sapiens OX=9606 GN=UBE2M PE=1 SV=1	Homo sapiens	1	2	2	10.9	20.9	183	0	13.235	230860	0	70	0			596
H0YH81;P06576;F8W0P7	ATP synthase subunit beta;ATP synthase subunit beta, mitochondrial	ATP5B	ATP5B	tr|H0YH81|H0YH81_HUMAN ATP synthase subunit beta (Fragment) OS=Homo sapiens OX=9606 GN=ATP5F1B PE=1 SV=1;sp|P06576|ATPB_HUMAN ATP synthase subunit beta, mitochondrial OS=Homo sapiens OX=9606 GN=ATP5F1B PE=1 SV=3;tr|F8W0P7|F8W0P7_HUMAN ATP synthase subunit	Homo sapiens	3	2	2	9.1	38.138	362	0	17.234	230130	0	70	0			294
A0A087WU64;A6NMQ1;P09884	DNA polymerase;DNA polymerase alpha catalytic subunit	POLA1	POLA1	tr|A0A087WU64|A0A087WU64_HUMAN DNA polymerase OS=Homo sapiens OX=9606 GN=POLA1 PE=1 SV=1;tr|A6NMQ1|A6NMQ1_HUMAN DNA polymerase OS=Homo sapiens OX=9606 GN=POLA1 PE=1 SV=1;sp|P09884|DPOLA_HUMAN DNA polymerase alpha catalytic subunit OS=Homo sapiens OX=9606 G	Homo sapiens	3	1	1	1.1	165.77	1461	0	58.727	228470	0	70	0			9
O60264	SWI/SNF-related matrix-associated actin-dependent regulator of chromatin subfamily A member 5	SMARCA5	SMARCA5	sp|O60264|SMCA5_HUMAN SWI/SNF-related matrix-associated actin-dependent regulator of chromatin subfamily A member 5 OS=Homo sapiens OX=9606 GN=SMARCA5 PE=1 SV=1	Homo sapiens	1	1	1	1.4	121.9	1052	0	8.4749	228240	0	70	0			402
H7C3I1;F6VDH7;Q3KNR6;Q8IZP2;P50502;Q8NFI4	Putative protein FAM10A4;Hsc70-interacting protein;Putative protein FAM10A5	ST13;ST13P4;ST13P5	ST13	tr|H7C3I1|H7C3I1_HUMAN Hsc70-interacting protein (Fragment) OS=Homo sapiens OX=9606 GN=ST13 PE=1 SV=1;tr|F6VDH7|F6VDH7_HUMAN Hsc70-interacting protein (Fragment) OS=Homo sapiens OX=9606 GN=ST13 PE=1 SV=1;tr|Q3KNR6|Q3KNR6_HUMAN Hsc70-interacting protein OS=	Homo sapiens	6	2	2	16.4	16.219	146	0	22.552	228170	0	70	0			259
F8VXU5;Q9UBQ0	Vacuolar protein sorting-associated protein 29	VPS29	VPS29	tr|F8VXU5|F8VXU5_HUMAN Vacuolar protein sorting-associated protein 29 OS=Homo sapiens OX=9606 GN=VPS29 PE=1 SV=1;sp|Q9UBQ0|VPS29_HUMAN Vacuolar protein sorting-associated protein 29 OS=Homo sapiens OX=9606 GN=VPS29 PE=1 SV=1	Homo sapiens	2	2	2	10.7	23.98	214	0	16.014	223490	0	70	0			265
B1AKQ8;F6X3N5;F6UT28;P62873	Guanine nucleotide-binding protein G(I)/G(S)/G(T) subunit beta-1	GNB1	GNB1	tr|B1AKQ8|B1AKQ8_HUMAN Guanine nucleotide-binding protein G(I)/G(S)/G(T) subunit beta-1 (Fragment) OS=Homo sapiens OX=9606 GN=GNB1 PE=1 SV=8;tr|F6X3N5|F6X3N5_HUMAN Guanine nucleotide-binding protein G(I)/G(S)/G(T) subunit beta-1 (Fragment) OS=Homo sapiens	Homo sapiens	4	1	1	16.8	12.198	107	0	8.2783	221320	0	70	0			136
I3L0V3;J3KR97;Q9BTW9	Tubulin-specific chaperone D	TBCD	TBCD	tr|I3L0V3|I3L0V3_HUMAN Tubulin-specific chaperone D (Fragment) OS=Homo sapiens OX=9606 GN=TBCD PE=1 SV=1;tr|J3KR97|J3KR97_HUMAN Tubulin-specific chaperone D OS=Homo sapiens OX=9606 GN=TBCD PE=1 SV=1;sp|Q9BTW9|TBCD_HUMAN Tubulin-specific chaperone D OS=Homo	Homo sapiens	3	1	1	5.1	26.14	237	0.0027701	6.3116	220410	0	70	0			313
Q13885	Tubulin beta-2A chain	TUBB2A	TUBB2A	sp|Q13885|TBB2A_HUMAN Tubulin beta-2A chain OS=Homo sapiens OX=9606 GN=TUBB2A PE=1 SV=1	Homo sapiens	1	22	1	54.6	49.906	445	1	-2	215830	0	70	0	+		671
A0A6Q8PGB5;A0A6Q8PGR9;A0A6Q8PGE8;A0A6Q8PF33;A0A6Q8PFY2;A0A6Q8PGN5;H3BPK7;P49588;A0A6Q8PF77;A0A6Q8PHP3;A0A6Q8PHP7;A0A6Q8PH44;A0A6Q8PFK3;A0A6Q8PHJ2	Alanine--tRNA ligase, cytoplasmic	AARS	AARS	tr|A0A6Q8PGB5|A0A6Q8PGB5_HUMAN Alanine--tRNA ligase OS=Homo sapiens OX=9606 GN=AARS1 PE=1 SV=1;tr|A0A6Q8PGR9|A0A6Q8PGR9_HUMAN Alanine--tRNA ligase OS=Homo sapiens OX=9606 GN=AARS1 PE=1 SV=1;tr|A0A6Q8PGE8|A0A6Q8PGE8_HUMAN Alanine--tRNA ligase OS=Homo sapien	Homo sapiens	14	2	2	3.4	102.42	925	0	23.387	215770	0	70	0			112
P62318	Small nuclear ribonucleoprotein Sm D3	SNRPD3	SNRPD3	sp|P62318|SMD3_HUMAN Small nuclear ribonucleoprotein Sm D3 OS=Homo sapiens OX=9606 GN=SNRPD3 PE=1 SV=1	Homo sapiens	1	1	1	7.9	13.916	126	0.0027473	6.2482	215520	0	70	0			610
E7EVX8;Q8WWY3;E7EU94;E7ESX0;E7EN72	U4/U6 small nuclear ribonucleoprotein Prp31	PRPF31	PRPF31	tr|E7EVX8|E7EVX8_HUMAN Pre-mRNA-processing factor 31 OS=Homo sapiens OX=9606 GN=PRPF31 PE=1 SV=1;sp|Q8WWY3|PRP31_HUMAN U4/U6 small nuclear ribonucleoprotein Prp31 OS=Homo sapiens OX=9606 GN=PRPF31 PE=1 SV=2;tr|E7EU94|E7EU94_HUMAN U4/U6 small nuclear ribonu	Homo sapiens	5	2	2	9.5	54.766	493	0	11.795	215160	0	70	0			227
P09211;A0A087X243;A0A087X2E9;A8MX94	Glutathione S-transferase P	GSTP1	GSTP1	sp|P09211|GSTP1_HUMAN Glutathione S-transferase P OS=Homo sapiens OX=9606 GN=GSTP1 PE=1 SV=2;tr|A0A087X243|A0A087X243_HUMAN Glutathione S-transferase P (Fragment) OS=Homo sapiens OX=9606 GN=GSTP1 PE=1 SV=1;tr|A0A087X2E9|A0A087X2E9_HUMAN Glutathione S-trans	Homo sapiens	4	2	2	14.3	23.356	210	0	12.715	214690	0	70	0			446
P04350;M0R278;M0R1I1	Tubulin beta-4A chain	TUBB4A	TUBB4A	sp|P04350|TBB4A_HUMAN Tubulin beta-4A chain OS=Homo sapiens OX=9606 GN=TUBB4A PE=1 SV=2	Homo sapiens	3	19	0	61.7	49.585	444	0	7.0593	214170	0	70	0			428
A0A3B3ITT5;P47914	60S ribosomal protein L29	RPL29	RPL29	tr|A0A3B3ITT5|A0A3B3ITT5_HUMAN 60S ribosomal protein L29 OS=Homo sapiens OX=9606 GN=RPL29 PE=1 SV=1;sp|P47914|RL29_HUMAN 60S ribosomal protein L29 OS=Homo sapiens OX=9606 GN=RPL29 PE=1 SV=2	Homo sapiens	2	1	1	9	18.512	167	0	10.918	208530	0	70	0			93
B7Z9I1;Q5T4U5;P11310	Medium-chain specific acyl-CoA dehydrogenase, mitochondrial	ACADM	ACADM	tr|B7Z9I1|B7Z9I1_HUMAN Medium-chain specific acyl-CoA dehydrogenase, mitochondrial OS=Homo sapiens OX=9606 GN=ACADM PE=1 SV=1;tr|Q5T4U5|Q5T4U5_HUMAN Medium-chain specific acyl-CoA dehydrogenase, mitochondrial OS=Homo sapiens OX=9606 GN=ACADM PE=1 SV=1;sp|P	Homo sapiens	3	1	1	3.1	42.426	385	0	6.8595	206520	0	70	0			159
Q14204	Cytoplasmic dynein 1 heavy chain 1	DYNC1H1	DYNC1H1	sp|Q14204|DYHC1_HUMAN Cytoplasmic dynein 1 heavy chain 1 OS=Homo sapiens OX=9606 GN=DYNC1H1 PE=1 SV=5	Homo sapiens	1	2	2	0.5	532.4	4646	0	13.162	206220	0	70	0			678
P31939	Bifunctional purine biosynthesis protein PURH;Phosphoribosylaminoimidazolecarboxamide formyltransferase;IMP cyclohydrolase	ATIC	ATIC	sp|P31939|PUR9_HUMAN Bifunctional purine biosynthesis protein ATIC OS=Homo sapiens OX=9606 GN=ATIC PE=1 SV=3	Homo sapiens	1	1	1	3.5	64.615	592	0.0027933	6.3612	204370	0	70	0			527
D6RD66;O75083	WD repeat-containing protein 1	WDR1	WDR1	tr|D6RD66|D6RD66_HUMAN WD repeat-containing protein 1 (Fragment) OS=Homo sapiens OX=9606 GN=WDR1 PE=1 SV=1;sp|O75083|WDR1_HUMAN WD repeat-containing protein 1 OS=Homo sapiens OX=9606 GN=WDR1 PE=1 SV=4	Homo sapiens	2	1	1	6.5	26.797	245	0.0077922	5.9617	203260	0	70	0			211
E5RHH1;J3KSS0;J3QRI7;J3QQQ9;J3QQV1;E5RIT6;Q9UNX3;P61254	60S ribosomal protein L26-like 1;60S ribosomal protein L26	RPL26L1;RPL26	RPL26L1	tr|E5RHH1|E5RHH1_HUMAN 60S ribosomal protein L26-like 1 (Fragment) OS=Homo sapiens OX=9606 GN=RPL26L1 PE=1 SV=8;tr|J3KSS0|J3KSS0_HUMAN 60S ribosomal protein L26 OS=Homo sapiens OX=9606 GN=RPL26 PE=3 SV=1;tr|J3QRI7|J3QRI7_HUMAN 60S ribosomal protein L26 (Fr	Homo sapiens	8	1	1	28.9	4.5282	38	1	-2	200840	0	70	0	+		217
P17858;A0A2R8Y891;P08237	ATP-dependent 6-phosphofructokinase, liver type	PFKL	PFKL	sp|P17858|PFKAL_HUMAN ATP-dependent 6-phosphofructokinase, liver type OS=Homo sapiens OX=9606 GN=PFKL PE=1 SV=6	Homo sapiens	3	4	3	7.3	85.018	780	0	23.611	200350	0	70	0			481
Q9Y3B4	Splicing factor 3B subunit 6	SF3B6	SF3B6	sp|Q9Y3B4|SF3B6_HUMAN Splicing factor 3B subunit 6 OS=Homo sapiens OX=9606 GN=SF3B6 PE=1 SV=1	Homo sapiens	1	1	1	11.2	14.585	125	0	19.227	200340	0	70	0			821
A0A087WWX0;A0A087WVZ9;P19388;A0A0A0MQR7	DNA-directed RNA polymerases I, II, and III subunit RPABC1	POLR2E	POLR2E	tr|A0A087WWX0|A0A087WWX0_HUMAN DNA-directed RNA polymerases I, II, and III subunit RPABC1 (Fragment) OS=Homo sapiens OX=9606 GN=POLR2E PE=1 SV=1;tr|A0A087WVZ9|A0A087WVZ9_HUMAN DNA-directed RNA polymerase II subunit E OS=Homo sapiens OX=9606 GN=POLR2E PE=1	Homo sapiens	4	2	2	14.2	15.421	134	0	19.355	200280	0	70	0			17
A0A087WWJ1;A0A494C0M1;P52701	DNA mismatch repair protein Msh6	MSH6	MSH6	tr|A0A087WWJ1|A0A087WWJ1_HUMAN DNA mismatch repair protein Msh6 OS=Homo sapiens OX=9606 GN=MSH6 PE=1 SV=1;tr|A0A494C0M1|A0A494C0M1_HUMAN DNA mismatch repair protein OS=Homo sapiens OX=9606 GN=MSH6 PE=1 SV=1;sp|P52701|MSH6_HUMAN DNA mismatch repair protein	Homo sapiens	3	2	2	2.1	121.12	1067	0	18.368	198660	0	70	0			20
K7EIG1;A0A494C0R8;O75153;I3L2B0;Q9Y5I4	Clustered mitochondria protein homolog;Protocadherin alpha-C2	CLUH;PCDHAC2	CLUH	tr|K7EIG1|K7EIG1_HUMAN Clustered mitochondria protein homolog (Fragment) OS=Homo sapiens OX=9606 GN=CLUH PE=1 SV=2;tr|A0A494C0R8|A0A494C0R8_HUMAN Clustered mitochondria protein homolog OS=Homo sapiens OX=9606 GN=CLUH PE=1 SV=1;sp|O75153|CLU_HUMAN Clustered	Homo sapiens	5	2	2	1.3	140.49	1251	0	12.304	198380	0	70	0			97
H0YMU3;H0YL72;P50213;H0YLI6	Isocitrate dehydrogenase [NAD] subunit alpha, mitochondrial	IDH3A	IDH3A	tr|H0YMU3|H0YMU3_HUMAN Isocitrate dehydrogenase [NAD] subunit alpha, mitochondrial (Fragment) OS=Homo sapiens OX=9606 GN=IDH3A PE=1 SV=1;tr|H0YL72|H0YL72_HUMAN Isocitrate dehydrogenase [NAD] subunit alpha, mitochondrial OS=Homo sapiens OX=9606 GN=IDH3A PE=	Homo sapiens	4	2	2	18.9	19.247	175	0	12.054	194880	0	70	0			298
A0A1C7CYX9;Q16555;E5RFU4;E9PD68;Q14194	Dihydropyrimidinase-related protein 2;Dihydropyrimidinase-related protein 1	DPYSL2;CRMP1	DPYSL2	tr|A0A1C7CYX9|A0A1C7CYX9_HUMAN Dihydropyrimidinase-related protein 2 OS=Homo sapiens OX=9606 GN=DPYSL2 PE=1 SV=1;sp|Q16555|DPYL2_HUMAN Dihydropyrimidinase-related protein 2 OS=Homo sapiens OX=9606 GN=DPYSL2 PE=1 SV=1;tr|E5RFU4|E5RFU4_HUMAN Dihydropyrimidin	Homo sapiens	5	2	2	5.9	73.502	677	0	12.828	194870	0	70	0			66
A0A087WXQ8;A0A087WY10;A0A087WUL2;P49720	Proteasome subunit beta type-3	PSMB3	PSMB3	tr|A0A087WXQ8|A0A087WXQ8_HUMAN Proteasome chain 13 OS=Homo sapiens OX=9606 GN=PSMB3 PE=1 SV=1;tr|A0A087WY10|A0A087WY10_HUMAN Proteasome chain 13 OS=Homo sapiens OX=9606 GN=PSMB3 PE=1 SV=1;tr|A0A087WUL2|A0A087WUL2_HUMAN Proteasome chain 13 (Fragment) OS=Hom	Homo sapiens	4	2	2	22.4	12.082	107	0	26.319	189160	0	70	0			12
P67775;P62714;H0YC23	Serine/threonine-protein phosphatase 2A catalytic subunit alpha isoform;Serine/threonine-protein phosphatase 2A catalytic subunit beta isoform	PPP2CA;PPP2CB	PPP2CA	sp|P67775|PP2AA_HUMAN Serine/threonine-protein phosphatase 2A catalytic subunit alpha isoform OS=Homo sapiens OX=9606 GN=PPP2CA PE=1 SV=1;sp|P62714|PP2AB_HUMAN Serine/threonine-protein phosphatase 2A catalytic subunit beta isoform OS=Homo sapiens OX=9606 G	Homo sapiens	3	2	1	9.1	35.594	309	0	19.77	188570	0	70	0			613
P54136	Arginine--tRNA ligase, cytoplasmic	RARS	RARS	sp|P54136|SYRC_HUMAN Arginine--tRNA ligase, cytoplasmic OS=Homo sapiens OX=9606 GN=RARS1 PE=1 SV=2	Homo sapiens	1	2	2	3.9	75.378	660	0	11.053	188490	0	70	0			579
P62899	60S ribosomal protein L31	RPL31	RPL31	sp|P62899|RL31_HUMAN 60S ribosomal protein L31 OS=Homo sapiens OX=9606 GN=RPL31 PE=1 SV=1	Homo sapiens	1	1	1	8	14.463	125	0	21.152	186470	0	70	0			615
P32119;A6NIW5	Peroxiredoxin-2	PRDX2	PRDX2	sp|P32119|PRDX2_HUMAN Peroxiredoxin-2 OS=Homo sapiens OX=9606 GN=PRDX2 PE=1 SV=5;tr|A6NIW5|A6NIW5_HUMAN Peroxiredoxin 2, isoform CRA_a OS=Homo sapiens OX=9606 GN=PRDX2 PE=1 SV=2	Homo sapiens	2	3	2	19.7	21.892	198	0	13.008	184460	0	70	0			532
H7C2Y5;Q9UBS4	DnaJ homolog subfamily B member 11	DNAJB11	DNAJB11	tr|H7C2Y5|H7C2Y5_HUMAN DnaJ_C domain-containing protein (Fragment) OS=Homo sapiens OX=9606 PE=1 SV=8;sp|Q9UBS4|DJB11_HUMAN DnaJ homolog subfamily B member 11 OS=Homo sapiens OX=9606 GN=DNAJB11 PE=1 SV=1	Homo sapiens	2	1	1	6.6	19.149	167	0	7.8458	183790	0	70	0			311
A0A0A0MSP6;H7C3A1;Q9BXP5	Serrate RNA effector molecule homolog	SRRT	SRRT	tr|A0A0A0MSP6|A0A0A0MSP6_HUMAN Arsenite-resistance protein 2 (Fragment) OS=Homo sapiens OX=9606 GN=SRRT PE=1 SV=6;tr|H7C3A1|H7C3A1_HUMAN Arsenite-resistance protein 2 (Fragment) OS=Homo sapiens OX=9606 GN=SRRT PE=1 SV=1;sp|Q9BXP5|SRRT_HUMAN Serrate RNA eff	Homo sapiens	3	1	1	8.8	16.435	148	0	9.1594	180210	0	70	0			40
A0A087WUK2;O14979	Heterogeneous nuclear ribonucleoprotein D-like	HNRNPDL	HNRNPDL	tr|A0A087WUK2|A0A087WUK2_HUMAN Heterogeneous nuclear ribonucleoprotein D-like OS=Homo sapiens OX=9606 GN=HNRNPDL PE=1 SV=1;sp|O14979|HNRDL_HUMAN Heterogeneous nuclear ribonucleoprotein D-like OS=Homo sapiens OX=9606 GN=HNRNPDL PE=1 SV=3	Homo sapiens	2	2	1	4.4	40.04	363	0.004065	6.1528	178040	0	70	0			11
B0QZ65;A0A0A0MQV8;B4DGD8;H0Y7I9;C9IZ08;F8W9S7;Q14C86;H0Y4E7	GTPase-activating protein and VPS9 domain-containing protein 1	GAPVD1	GAPVD1	tr|B0QZ65|B0QZ65_HUMAN GTPase-activating protein and VPS9 domain-containing protein 1 OS=Homo sapiens OX=9606 GN=GAPVD1 PE=1 SV=1;tr|A0A0A0MQV8|A0A0A0MQV8_HUMAN GTPase-activating protein and VPS9 domain-containing protein 1 OS=Homo sapiens OX=9606 GN=GAPVD	Homo sapiens	8	2	2	5.2	56.461	497	0	23.515	176890	0	70	0			34
P36404	ADP-ribosylation factor-like protein 2	ARL2	ARL2	sp|P36404|ARL2_HUMAN ADP-ribosylation factor-like protein 2 OS=Homo sapiens OX=9606 GN=ARL2 PE=1 SV=4	Homo sapiens	1	2	2	10.3	20.878	184	0	17.065	175610	0	70	0			539
Q5QPK2;H0Y368;O60762	Dolichol-phosphate mannosyltransferase subunit 1	DPM1	DPM1	tr|Q5QPK2|Q5QPK2_HUMAN Dolichol-phosphate mannosyltransferase subunit 1 OS=Homo sapiens OX=9606 GN=DPM1 PE=1 SV=1;tr|H0Y368|H0Y368_HUMAN Dolichol-phosphate mannosyltransferase subunit 1 (Fragment) OS=Homo sapiens OX=9606 GN=DPM1 PE=1 SV=1;sp|O60762|DPM1_HU	Homo sapiens	3	1	1	5.6	32.426	287	0.0014368	6.4799	173710	0	70	0			285
Q9UHB9	Signal recognition particle subunit SRP68	SRP68	SRP68	sp|Q9UHB9|SRP68_HUMAN Signal recognition particle subunit SRP68 OS=Homo sapiens OX=9606 GN=SRP68 PE=1 SV=2	Homo sapiens	1	2	2	3.5	70.729	627	0	12.739	172520	0	70	0			804
A0A087WX97;Q9BXK5	Bcl-2-like protein 13	BCL2L13	BCL2L13	tr|A0A087WX97|A0A087WX97_HUMAN Bcl-2-like protein 13 OS=Homo sapiens OX=9606 GN=BCL2L13 PE=1 SV=1;sp|Q9BXK5|B2L13_HUMAN Bcl-2-like protein 13 OS=Homo sapiens OX=9606 GN=BCL2L13 PE=1 SV=1	Homo sapiens	2	1	1	1.8	54.388	509	0	7.5193	172290	0	70	0			23
H0YJ63;G3V438;H0YJG7;O95433	Activator of 90 kDa heat shock protein ATPase homolog 1	AHSA1	AHSA1	tr|H0YJ63|H0YJ63_HUMAN Activator of 90 kDa heat shock protein ATPase homolog 1 (Fragment) OS=Homo sapiens OX=9606 GN=AHSA1 PE=1 SV=1;tr|G3V438|G3V438_HUMAN Activator of 90 kDa heat shock protein ATPase homolog 1 (Fragment) OS=Homo sapiens OX=9606 GN=AHSA1	Homo sapiens	4	1	1	24.4	10.031	90	0	7.0093	172210	0	70	0			278
E5RI99;P62888;A0A0B4J213;E5RJH3	60S ribosomal protein L30	RPL30	RPL30	tr|E5RI99|E5RI99_HUMAN 60S ribosomal protein L30 (Fragment) OS=Homo sapiens OX=9606 GN=RPL30 PE=1 SV=1;sp|P62888|RL30_HUMAN 60S ribosomal protein L30 OS=Homo sapiens OX=9606 GN=RPL30 PE=1 SV=2;tr|A0A0B4J213|A0A0B4J213_HUMAN 60S ribosomal protein L30 OS=Hom	Homo sapiens	4	2	2	27.2	12.656	114	0	13.923	169410	0	70	0			218
Q9Y295	Developmentally-regulated GTP-binding protein 1	DRG1	DRG1	sp|Q9Y295|DRG1_HUMAN Developmentally-regulated GTP-binding protein 1 OS=Homo sapiens OX=9606 GN=DRG1 PE=1 SV=1	Homo sapiens	1	1	1	3.8	40.542	367	0	8.637	168840	0	70	0			819
A0A087WYC0;A0A6Q8KRG2;Q08379	Golgin subfamily A member 2	GOLGA2	GOLGA2	tr|A0A087WYC0|A0A087WYC0_HUMAN Golgin subfamily A member 2 OS=Homo sapiens OX=9606 GN=GOLGA2 PE=1 SV=1;tr|A0A6Q8KRG2|A0A6Q8KRG2_HUMAN Golgin subfamily A member 2 OS=Homo sapiens OX=9606 GN=GOLGA2 PE=1 SV=1;sp|Q08379|GOGA2_HUMAN Golgin subfamily A member 2	Homo sapiens	3	1	1	3.5	31.894	286	0.0014472	6.5348	165690	0	70	0			25
G3V2U0;F8WDN3;Q9Y281	Cofilin-2	CFL2	CFL2	tr|G3V2U0|G3V2U0_HUMAN Cofilin-2 OS=Homo sapiens OX=9606 GN=CFL2 PE=1 SV=1;tr|F8WDN3|F8WDN3_HUMAN Cofilin-2 OS=Homo sapiens OX=9606 GN=CFL2 PE=1 SV=1;sp|Q9Y281|COF2_HUMAN Cofilin-2 OS=Homo sapiens OX=9606 GN=CFL2 PE=1 SV=1	Homo sapiens	3	1	1	61.9	2.2415	21	1	-2	164880	0	70	0	+		272
C9J3L8;C9J5W0;A0A3B3IRT8;E9PAL7;C9IZQ1;P43307	Translocon-associated protein subunit alpha	SSR1	SSR1	tr|C9J3L8|C9J3L8_HUMAN Signal sequence receptor subunit alpha OS=Homo sapiens OX=9606 GN=SSR1 PE=1 SV=1;tr|C9J5W0|C9J5W0_HUMAN Signal sequence receptor subunit alpha OS=Homo sapiens OX=9606 GN=SSR1 PE=1 SV=1;tr|A0A3B3IRT8|A0A3B3IRT8_HUMAN Signal sequence r	Homo sapiens	6	1	1	5.7	29.573	265	0	34.693	163660	0	70	0			89
J3KQ32;Q9NTK5;C9JTK6	Obg-like ATPase 1	OLA1	OLA1	tr|J3KQ32|J3KQ32_HUMAN Obg-like ATPase 1 OS=Homo sapiens OX=9606 GN=OLA1 PE=1 SV=1;sp|Q9NTK5|OLA1_HUMAN Obg-like ATPase 1 OS=Homo sapiens OX=9606 GN=OLA1 PE=1 SV=2;tr|C9JTK6|C9JTK6_HUMAN Obg-like ATPase 1 (Fragment) OS=Homo sapiens OX=9606 GN=OLA1 PE=1 SV=	Homo sapiens	3	2	2	6.7	46.937	416	0	19.318	163210	0	70	0			323
P78527	DNA-dependent protein kinase catalytic subunit	PRKDC	PRKDC	sp|P78527|PRKDC_HUMAN DNA-dependent protein kinase catalytic subunit OS=Homo sapiens OX=9606 GN=PRKDC PE=1 SV=3	Homo sapiens	1	1	1	0.4	469.08	4128	0	9.1098	161630	0	70	0			633
Q8N1B9;C9J6X0;A0A087WXC5;E7ESZ7;O95299	NADH dehydrogenase [ubiquinone] 1 alpha subcomplex subunit 10, mitochondrial	NDUFA10	NDUFA10	tr|Q8N1B9|Q8N1B9_HUMAN NADH dehydrogenase (Ubiquinone) 1 alpha subcomplex, 10, 42kDa, isoform CRA_c OS=Homo sapiens OX=9606 GN=NDUFA10 PE=1 SV=1;tr|C9J6X0|C9J6X0_HUMAN Complex I-42kD (Fragment) OS=Homo sapiens OX=9606 GN=NDUFA10 PE=1 SV=8;tr|A0A087WXC5|A0A	Homo sapiens	5	1	1	10.9	22.373	201	0	11.173	159980	0	70	0			24
C9JQ25		CCDC173	CCDC173	tr|C9JQ25|C9JQ25_HUMAN Coiled-coil domain-containing protein 173 (Fragment) OS=Homo sapiens OX=9606 GN=CCDC173 PE=1 SV=1	Homo sapiens	1	1	1	7.4	12.954	108	1	-2	158040	0	70	0	+		176
F8VTQ5;F8W646;F8VZ49;F8W6I7;Q32P51;P09651	Heterogeneous nuclear ribonucleoprotein A1-like 2;Heterogeneous nuclear ribonucleoprotein A1;Heterogeneous nuclear ribonucleoprotein A1, N-terminally processed	HNRNPA1;HNRNPA1L2	HNRNPA1	tr|F8VTQ5|F8VTQ5_HUMAN Heterogeneous nuclear ribonucleoprotein A1 (Fragment) OS=Homo sapiens OX=9606 GN=HNRNPA1 PE=1 SV=1;tr|F8W646|F8W646_HUMAN Helix-destabilizing protein (Fragment) OS=Homo sapiens OX=9606 GN=HNRNPA1 PE=1 SV=1;tr|F8VZ49|F8VZ49_HUMAN Heli	Homo sapiens	6	1	1	11	16.536	145	0	16.404	157880	0	70	0			263
K7ERK7;K7EMI7		UBALD2	UBALD2	tr|K7ERK7|K7ERK7_HUMAN UBA-like domain-containing protein 2 (Fragment) OS=Homo sapiens OX=9606 GN=UBALD2 PE=4 SV=1;tr|K7EMI7|K7EMI7_HUMAN UBA-like domain-containing protein 2 OS=Homo sapiens OX=9606 GN=UBALD2 PE=4 SV=1	Homo sapiens	2	1	1	35.9	6.7235	64	1	-2	156650	0	70	0	+		340
K7EKS1;P36954;K7EK49	DNA-directed RNA polymerase II subunit RPB9	POLR2I	POLR2I	tr|K7EKS1|K7EKS1_HUMAN DNA-directed RNA polymerase II subunit RPB9 OS=Homo sapiens OX=9606 GN=POLR2I PE=1 SV=1;sp|P36954|RPB9_HUMAN DNA-directed RNA polymerase II subunit RPB9 OS=Homo sapiens OX=9606 GN=POLR2I PE=1 SV=1;tr|K7EK49|K7EK49_HUMAN DNA-directed	Homo sapiens	3	2	2	43.2	10.245	88	0	12.953	153790	0	70	0			336
P53618	Coatomer subunit beta	COPB1	COPB1	sp|P53618|COPB_HUMAN Coatomer subunit beta OS=Homo sapiens OX=9606 GN=COPB1 PE=1 SV=3	Homo sapiens	1	1	1	2.5	107.14	953	0.0014493	6.5538	151920	0	70	0			577
G3V3K9;G3V4I1;G3V5F3;J3KNG4;Q8WVM8	Sec1 family domain-containing protein 1	SCFD1	SCFD1	tr|G3V3K9|G3V3K9_HUMAN Sec1 family domain-containing protein 1 OS=Homo sapiens OX=9606 GN=SCFD1 PE=1 SV=1;tr|G3V4I1|G3V4I1_HUMAN Sec1 family domain-containing protein 1 OS=Homo sapiens OX=9606 GN=SCFD1 PE=1 SV=1;tr|G3V5F3|G3V5F3_HUMAN Sec1 family domain-co	Homo sapiens	5	1	1	31.2	5.0969	48	0	57.003	151290	0	70	0			277
H0YJI1;A0A087WUN7;H0YJ40;G3V4X6;G3V2S9;Q9GZT3	SRA stem-loop-interacting RNA-binding protein, mitochondrial	SLIRP	SLIRP	tr|H0YJI1|H0YJI1_HUMAN SRA stem-loop-interacting RNA-binding protein, mitochondrial (Fragment) OS=Homo sapiens OX=9606 GN=SLIRP PE=1 SV=1;tr|A0A087WUN7|A0A087WUN7_HUMAN SRA stem-loop-interacting RNA-binding protein, mitochondrial OS=Homo sapiens OX=9606 GN	Homo sapiens	6	1	1	25	4.1678	40	0.0053548	6.1014	150760	0	70	0			13
Q96ST3	Paired amphipathic helix protein Sin3a	SIN3A	SIN3A	sp|Q96ST3|SIN3A_HUMAN Paired amphipathic helix protein Sin3a OS=Homo sapiens OX=9606 GN=SIN3A PE=1 SV=2	Homo sapiens	1	1	1	1.9	145.17	1273	0	18.091	148760	0	70	0			765
H0Y3P2;D3DQV9;P78344;E9PKF8;H0YE22;H0YCH5	Eukaryotic translation initiation factor 4 gamma 2	EIF4G2	EIF4G2	tr|H0Y3P2|H0Y3P2_HUMAN Eukaryotic translation initiation factor 4 gamma 2 OS=Homo sapiens OX=9606 GN=EIF4G2 PE=1 SV=1;tr|D3DQV9|D3DQV9_HUMAN Eukaryotic translation initiation factor 4 gamma 2 (Fragment) OS=Homo sapiens OX=9606 GN=EIF4G2 PE=1 SV=1;sp|P78344	Homo sapiens	6	2	2	2.2	98.117	869	0	11.178	148410	0	70	0			203
A0A0C4DGP4		PRKCSH	PRKCSH	tr|A0A0C4DGP4|A0A0C4DGP4_HUMAN Glucosidase 2 subunit beta (Fragment) OS=Homo sapiens OX=9606 GN=PRKCSH PE=1 SV=1	Homo sapiens	1	3	1	25.5	22.628	200	0	6.9612	146150	0	70	0			51
A0A024R4E5;Q00341;C9JHS9;C9J739;C9JMQ6;C9JQ82;C9JBS3;C9JEJ8;C9JHN6;C9JT62;C9JHS7;C9JK79;C9JHZ8;C9JES8;C9JZI8;C9J5E5;C9JIZ1;H7BZC3;H7C2D1;H0Y394	Vigilin	HDLBP	HDLBP	tr|A0A024R4E5|A0A024R4E5_HUMAN High density lipoprotein binding protein (Vigilin), isoform CRA_a OS=Homo sapiens OX=9606 GN=HDLBP PE=1 SV=1;sp|Q00341|VIGLN_HUMAN Vigilin OS=Homo sapiens OX=9606 GN=HDLBP PE=1 SV=2;tr|C9JHS9|C9JHS9_HUMAN Vigilin (Fragment) O	Homo sapiens	20	2	2	2.4	141.44	1268	0	14.233	146130	0	70	0			1
P53396	ATP-citrate synthase	ACLY	ACLY	sp|P53396|ACLY_HUMAN ATP-citrate synthase OS=Homo sapiens OX=9606 GN=ACLY PE=1 SV=3	Homo sapiens	1	1	1	1.4	120.84	1101	0	14.348	145860	0	70	0			576
O43172	U4/U6 small nuclear ribonucleoprotein Prp4	PRPF4	PRPF4	sp|O43172|PRP4_HUMAN U4/U6 small nuclear ribonucleoprotein Prp4 OS=Homo sapiens OX=9606 GN=PRPF4 PE=1 SV=2	Homo sapiens	1	2	2	6.7	58.449	522	0	11.123	145270	0	70	0			395
P12236	ADP/ATP translocase 3;ADP/ATP translocase 3, N-terminally processed	SLC25A6	SLC25A6	sp|P12236|ADT3_HUMAN ADP/ATP translocase 3 OS=Homo sapiens OX=9606 GN=SLC25A6 PE=1 SV=4	Homo sapiens	1	4	1	14.4	32.866	298	0	9.7997	143390	0	70	0			458
Q5JY65;Q9BZJ0	Crooked neck-like protein 1	CRNKL1	CRNKL1	tr|Q5JY65|Q5JY65_HUMAN Crooked neck-like protein 1 OS=Homo sapiens OX=9606 GN=CRNKL1 PE=1 SV=1;sp|Q9BZJ0|CRNL1_HUMAN Crooked neck-like protein 1 OS=Homo sapiens OX=9606 GN=CRNKL1 PE=1 SV=4	Homo sapiens	2	1	1	1.6	99.172	836	0	7.8568	142590	0	70	0			710
A6NLM8;P51571	Translocon-associated protein subunit delta	SSR4	SSR4	tr|A6NLM8|A6NLM8_HUMAN Signal sequence receptor subunit delta OS=Homo sapiens OX=9606 GN=SSR4 PE=1 SV=1;sp|P51571|SSRD_HUMAN Translocon-associated protein subunit delta OS=Homo sapiens OX=9606 GN=SSR4 PE=1 SV=1	Homo sapiens	2	2	2	20.3	16.245	148	0	15.857	141850	0	70	0			127
O14802	DNA-directed RNA polymerase III subunit RPC1	POLR3A	POLR3A	sp|O14802|RPC1_HUMAN DNA-directed RNA polymerase III subunit RPC1 OS=Homo sapiens OX=9606 GN=POLR3A PE=1 SV=2	Homo sapiens	1	1	1	1.1	155.64	1390	0	19.383	141720	0	70	0			384
P21912	Succinate dehydrogenase [ubiquinone] iron-sulfur subunit, mitochondrial	SDHB	SDHB	sp|P21912|SDHB_HUMAN Succinate dehydrogenase [ubiquinone] iron-sulfur subunit, mitochondrial OS=Homo sapiens OX=9606 GN=SDHB PE=1 SV=3	Homo sapiens	1	1	1	3.2	31.629	280	0.0028329	6.3945	137440	0	70	0			493
H3BRV9;P61970	Nuclear transport factor 2	NUTF2	NUTF2	tr|H3BRV9|H3BRV9_HUMAN Nuclear transport factor 2 (Fragment) OS=Homo sapiens OX=9606 GN=NUTF2 PE=1 SV=1;sp|P61970|NTF2_HUMAN Nuclear transport factor 2 OS=Homo sapiens OX=9606 GN=NUTF2 PE=1 SV=1	Homo sapiens	2	1	1	7.5	12.159	107	0.0028011	6.3695	132110	0	70	0			307
Q9NS69	Mitochondrial import receptor subunit TOM22 homolog	TOMM22	TOMM22	sp|Q9NS69|TOM22_HUMAN Mitochondrial import receptor subunit TOM22 homolog OS=Homo sapiens OX=9606 GN=TOMM22 PE=1 SV=3	Homo sapiens	1	2	2	33.1	15.521	142	0	11.032	129740	0	70	0			792
Q5T7N0;A0A2R8Y4A2;A0A2R8Y6J3;P46777	60S ribosomal protein L5	RPL5	RPL5	tr|Q5T7N0|Q5T7N0_HUMAN 60S ribosomal protein L5 (Fragment) OS=Homo sapiens OX=9606 GN=RPL5 PE=1 SV=2;tr|A0A2R8Y4A2|A0A2R8Y4A2_HUMAN 60S ribosomal protein L5 OS=Homo sapiens OX=9606 GN=RPL5 PE=1 SV=1;tr|A0A2R8Y6J3|A0A2R8Y6J3_HUMAN 60S ribosomal protein L5 (	Homo sapiens	4	1	1	7.7	14.114	130	0.0028531	6.4306	128880	0	70	0			74
J3QLI9;P62314	Small nuclear ribonucleoprotein Sm D1	SNRPD1	SNRPD1	tr|J3QLI9|J3QLI9_HUMAN Small nuclear ribonucleoprotein Sm D1 OS=Homo sapiens OX=9606 GN=SNRPD1 PE=1 SV=1;sp|P62314|SMD1_HUMAN Small nuclear ribonucleoprotein Sm D1 OS=Homo sapiens OX=9606 GN=SNRPD1 PE=1 SV=1	Homo sapiens	2	1	1	17.3	8.3926	75	0.002845	6.4006	127900	0	70	0			327
H0YMF9;H0YN81;Q9GZS3	WD repeat-containing protein 61;WD repeat-containing protein 61, N-terminally processed	WDR61	WDR61	tr|H0YMF9|H0YMF9_HUMAN WD repeat-containing protein 61 OS=Homo sapiens OX=9606 GN=WDR61 PE=1 SV=1;tr|H0YN81|H0YN81_HUMAN WD repeat-containing protein 61 (Fragment) OS=Homo sapiens OX=9606 GN=WDR61 PE=1 SV=1;sp|Q9GZS3|WDR61_HUMAN WD repeat-containing protei	Homo sapiens	3	1	1	15.3	20.743	189	0	11.375	127620	0	70	0			302
A0A087WX29;Q13148;A0A087WW61;A0A087WX67;A0A087WXV3;A0A087WXQ5;K7EJM5;A0A087WV68;A0A0A0N0M3;K7EN94;B1AKP7;G3V162;A0A087X260;A0A087WYY0	TAR DNA-binding protein 43	TARDBP;TDP43	TARDBP	tr|A0A087WX29|A0A087WX29_HUMAN TAR DNA-binding protein 43 (Fragment) OS=Homo sapiens OX=9606 GN=TARDBP PE=1 SV=1;sp|Q13148|TADBP_HUMAN TAR DNA-binding protein 43 OS=Homo sapiens OX=9606 GN=TARDBP PE=1 SV=1;tr|A0A087WW61|A0A087WW61_HUMAN TAR DNA-binding pro	Homo sapiens	14	2	2	11.1	26.743	243	0	67.966	126740	0	70	0			22
M0R0F9;W4VSQ9;Q15642	Cdc42-interacting protein 4	TRIP10	TRIP10	tr|M0R0F9|M0R0F9_HUMAN Cdc42-interacting protein 4 OS=Homo sapiens OX=9606 GN=TRIP10 PE=1 SV=1;tr|W4VSQ9|W4VSQ9_HUMAN Cdc42-interacting protein 4 OS=Homo sapiens OX=9606 GN=TRIP10 PE=1 SV=1;sp|Q15642|CIP4_HUMAN Cdc42-interacting protein 4 OS=Homo sapiens O	Homo sapiens	3	1	1	5.3	49.712	437	0.0040595	6.1527	126560	0	70	0			367
Q13426	DNA repair protein XRCC4	XRCC4	XRCC4	sp|Q13426|XRCC4_HUMAN DNA repair protein XRCC4 OS=Homo sapiens OX=9606 GN=XRCC4 PE=1 SV=2	Homo sapiens	1	1	1	5.4	38.286	336	0	30.951	125700	0	70	0			667
Q8IYS1	Peptidase M20 domain-containing protein 2	PM20D2	PM20D2	sp|Q8IYS1|P20D2_HUMAN Peptidase M20 domain-containing protein 2 OS=Homo sapiens OX=9606 GN=PM20D2 PE=1 SV=2	Homo sapiens	1	1	1	2.5	47.776	436	0.0040761	6.1611	125440	0	70	0			735
A0A1W2PNX8;Q9H3U1	Protein unc-45 homolog A	UNC45A	UNC45A	tr|A0A1W2PNX8|A0A1W2PNX8_HUMAN Protein unc-45 homolog A OS=Homo sapiens OX=9606 GN=UNC45A PE=1 SV=1;sp|Q9H3U1|UN45A_HUMAN Protein unc-45 homolog A OS=Homo sapiens OX=9606 GN=UNC45A PE=1 SV=1	Homo sapiens	2	1	1	1	118.39	1084	0	11.35	124190	0	70	0			67
Q7Z7H8	39S ribosomal protein L10, mitochondrial	MRPL10	MRPL10	sp|Q7Z7H8|RM10_HUMAN 39S ribosomal protein L10, mitochondrial OS=Homo sapiens OX=9606 GN=MRPL10 PE=1 SV=3	Homo sapiens	1	1	1	3.8	29.282	261	0.0027739	6.3401	121820	0	70	0			729
Q9H0S4	Probable ATP-dependent RNA helicase DDX47	DDX47	DDX47	sp|Q9H0S4|DDX47_HUMAN Probable ATP-dependent RNA helicase DDX47 OS=Homo sapiens OX=9606 GN=DDX47 PE=1 SV=1	Homo sapiens	1	2	2	5.3	50.646	455	0	20.069	121640	0	70	0			781
B4DY09;Q12905;X6R6Z1;A0A0A0MRL0	Interleukin enhancer-binding factor 2	ILF2	ILF2	tr|B4DY09|B4DY09_HUMAN Interleukin enhancer-binding factor 2 OS=Homo sapiens OX=9606 GN=ILF2 PE=1 SV=1;sp|Q12905|ILF2_HUMAN Interleukin enhancer-binding factor 2 OS=Homo sapiens OX=9606 GN=ILF2 PE=1 SV=2;tr|X6R6Z1|X6R6Z1_HUMAN Interleukin enhancer-binding	Homo sapiens	4	2	2	9.4	38.91	352	0	15.366	119600	0	70	0			150
Q8N1G4	Leucine-rich repeat-containing protein 47	LRRC47	LRRC47	sp|Q8N1G4|LRC47_HUMAN Leucine-rich repeat-containing protein 47 OS=Homo sapiens OX=9606 GN=LRRC47 PE=1 SV=1	Homo sapiens	1	1	1	3.1	63.472	583	0	9.0367	119340	0	70	0			738
P19367	Hexokinase-1	HK1	HK1	sp|P19367|HXK1_HUMAN Hexokinase-1 OS=Homo sapiens OX=9606 GN=HK1 PE=1 SV=3	Homo sapiens	1	2	2	2.4	102.48	917	0	14.409	118840	0	70	0			484
Q6QNY1	Biogenesis of lysosome-related organelles complex 1 subunit 2	BLOC1S2	BLOC1S2	sp|Q6QNY1|BL1S2_HUMAN Biogenesis of lysosome-related organelles complex 1 subunit 2 OS=Homo sapiens OX=9606 GN=BLOC1S2 PE=1 SV=1	Homo sapiens	1	1	1	7.7	15.961	142	0.005305	6.0493	117090	0	70	0			719
P23526	Adenosylhomocysteinase	AHCY	AHCY	sp|P23526|SAHH_HUMAN Adenosylhomocysteinase OS=Homo sapiens OX=9606 GN=AHCY PE=1 SV=4	Homo sapiens	1	2	2	4.9	47.716	432	0	12.05	114780	0	70	0			499
E9PLF1;E9PHN7;E9PHN6;F6XZQ7;P28161	Glutathione S-transferase Mu 2	GSTM2	GSTM2	tr|E9PLF1|E9PLF1_HUMAN Glutathione S-transferase Mu 2 (Fragment) OS=Homo sapiens OX=9606 GN=GSTM2 PE=1 SV=2;tr|E9PHN7|E9PHN7_HUMAN Glutathione S-transferase Mu 2 OS=Homo sapiens OX=9606 GN=GSTM2 PE=1 SV=2;tr|E9PHN6|E9PHN6_HUMAN Glutathione S-transferase OS	Homo sapiens	5	1	1	7.5	17.369	147	1	-2	110340	0	70	0	+		237
P55010	Eukaryotic translation initiation factor 5	EIF5	EIF5	sp|P55010|IF5_HUMAN Eukaryotic translation initiation factor 5 OS=Homo sapiens OX=9606 GN=EIF5 PE=1 SV=2	Homo sapiens	1	2	2	5.6	49.222	431	0	11.871	108470	0	70	0			581
Q5T6H7;Q9NQW7	Xaa-Pro aminopeptidase 1	XPNPEP1	XPNPEP1	tr|Q5T6H7|Q5T6H7_HUMAN Xaa-Pro aminopeptidase 1 OS=Homo sapiens OX=9606 GN=XPNPEP1 PE=1 SV=1;sp|Q9NQW7|XPP1_HUMAN Xaa-Pro aminopeptidase 1 OS=Homo sapiens OX=9606 GN=XPNPEP1 PE=1 SV=3	Homo sapiens	2	1	1	2.9	62.138	552	0	9.7573	107890	0	70	0			713
B3KXD6;B5MCF9;O00541	Pescadillo homolog	PES1	PES1	tr|B3KXD6|B3KXD6_HUMAN Pescadillo homolog OS=Homo sapiens OX=9606 GN=PES1 PE=1 SV=1;tr|B5MCF9|B5MCF9_HUMAN Pescadillo homolog OS=Homo sapiens OX=9606 GN=PES1 PE=1 SV=1;sp|O00541|PESC_HUMAN Pescadillo homolog OS=Homo sapiens OX=9606 GN=PES1 PE=1 SV=1	Homo sapiens	3	1	1	2.2	51.464	449	0.0077821	5.9537	107730	0	70	0			144
Q15758	Neutral amino acid transporter B(0)	SLC1A5	SLC1A5	sp|Q15758|AAAT_HUMAN Neutral amino acid transporter B(0) OS=Homo sapiens OX=9606 GN=SLC1A5 PE=1 SV=2	Homo sapiens	1	1	1	2	56.598	541	0.0053405	6.0899	104020	0	70	0			696
Q15459	Splicing factor 3A subunit 1	SF3A1	SF3A1	sp|Q15459|SF3A1_HUMAN Splicing factor 3A subunit 1 OS=Homo sapiens OX=9606 GN=SF3A1 PE=1 SV=1	Homo sapiens	1	1	1	3	88.885	793	0	9.3322	101730	0	70	0			691
P62316;K7EJB5;K7ERG4	Small nuclear ribonucleoprotein Sm D2	SNRPD2	SNRPD2	sp|P62316|SMD2_HUMAN Small nuclear ribonucleoprotein Sm D2 OS=Homo sapiens OX=9606 GN=SNRPD2 PE=1 SV=1;tr|K7EJB5|K7EJB5_HUMAN Small nuclear ribonucleoprotein Sm D2 OS=Homo sapiens OX=9606 GN=SNRPD2 PE=1 SV=1;tr|K7ERG4|K7ERG4_HUMAN Small nuclear ribonucleop	Homo sapiens	3	2	2	23.7	13.527	118	0	11.911	101690	0	70	0			609
O00743	Serine/threonine-protein phosphatase 6 catalytic subunit;Serine/threonine-protein phosphatase 6 catalytic subunit, N-terminally processed	PPP6C	PPP6C	sp|O00743|PPP6_HUMAN Serine/threonine-protein phosphatase 6 catalytic subunit OS=Homo sapiens OX=9606 GN=PPP6C PE=1 SV=1	Homo sapiens	1	1	1	4.3	35.144	305	0.0027624	6.3002	101680	0	70	0			381
H0Y564;Q9H1A4	Anaphase-promoting complex subunit 1	ANAPC1	ANAPC1	tr|H0Y564|H0Y564_HUMAN Anaphase-promoting complex subunit 1 (Fragment) OS=Homo sapiens OX=9606 GN=ANAPC1 PE=1 SV=1;sp|Q9H1A4|APC1_HUMAN Anaphase-promoting complex subunit 1 OS=Homo sapiens OX=9606 GN=ANAPC1 PE=1 SV=1	Homo sapiens	2	1	1	1	161.45	1452	0	8.5839	101580	0	70	0			287
Q5T7U4;Q5T7U1;Q9Y5Q8	General transcription factor 3C polypeptide 5	GTF3C5	GTF3C5	tr|Q5T7U4|Q5T7U4_HUMAN General transcription factor 3C polypeptide 5 (Fragment) OS=Homo sapiens OX=9606 GN=GTF3C5 PE=1 SV=1;tr|Q5T7U1|Q5T7U1_HUMAN General transcription factor 3C polypeptide 5 OS=Homo sapiens OX=9606 GN=GTF3C5 PE=1 SV=1;sp|Q9Y5Q8|TF3C5_HUM	Homo sapiens	3	1	1	3.7	28.513	244	0.0077022	5.8809	100400	0	70	0			715
Q6GMV2	SET and MYND domain-containing protein 5	SMYD5	SMYD5	sp|Q6GMV2|SMYD5_HUMAN SET and MYND domain-containing protein 5 OS=Homo sapiens OX=9606 GN=SMYD5 PE=1 SV=2	Homo sapiens	1	2	2	5.5	47.34	418	0	18.836	99011	0	70	0			717
surface		S-protein	S-protein	surface glycoprotein [Severe acute respiratory syndrome coronavirus 2] 1273 aa protein YP_009724390.1 GI:1796318598	SARS-Cov-2	1	1	1	0.8	141.18	1273	0	7.2391	96759	0	70	0			838
K7EMN2;K7EM49;K7EPF6;P52209	6-phosphogluconate dehydrogenase, decarboxylating	PGD	PGD	tr|K7EMN2|K7EMN2_HUMAN 6-phosphogluconate dehydrogenase, decarboxylating (Fragment) OS=Homo sapiens OX=9606 GN=PGD PE=1 SV=1;tr|K7EM49|K7EM49_HUMAN Phosphogluconate dehydrogenase (NADP(+)-dependent, decarboxylating) (Fragment) OS=Homo sapiens OX=9606 GN=PG	Homo sapiens	4	1	1	10.6	17.293	160	0	22.749	96461	0	70	0			339
Q9NXH9;K7EQQ8	tRNA (guanine(26)-N(2))-dimethyltransferase	TRMT1	TRMT1	sp|Q9NXH9|TRM1_HUMAN tRNA (guanine(26)-N(2))-dimethyltransferase OS=Homo sapiens OX=9606 GN=TRMT1 PE=1 SV=1;tr|K7EQQ8|K7EQQ8_HUMAN tRNA (guanine(26)-N(2))-dimethyltransferase (Fragment) OS=Homo sapiens OX=9606 GN=TRMT1 PE=1 SV=1	Homo sapiens	2	3	3	5.9	72.233	659	0	21.073	96191	0	70	0			795
A0A499FJL1;P48147	Prolyl endopeptidase	PREP	PREP	tr|A0A499FJL1|A0A499FJL1_HUMAN Post-proline cleaving enzyme OS=Homo sapiens OX=9606 GN=PREP PE=1 SV=1;sp|P48147|PPCE_HUMAN Prolyl endopeptidase OS=Homo sapiens OX=9606 GN=PREP PE=1 SV=2	Homo sapiens	2	1	1	2.6	72.926	644	0	22.717	95769	0	70	0			100
Q9BV20	Methylthioribose-1-phosphate isomerase	MRI1	MRI1	sp|Q9BV20|MTNA_HUMAN Methylthioribose-1-phosphate isomerase OS=Homo sapiens OX=9606 GN=MRI1 PE=1 SV=1	Homo sapiens	1	1	1	3.5	39.149	369	0.0053333	6.078	95409	0	70	0			775
Q93008;O00507	Probable ubiquitin carboxyl-terminal hydrolase FAF-X	USP9X	USP9X	sp|Q93008|USP9X_HUMAN Probable ubiquitin carboxyl-terminal hydrolase FAF-X OS=Homo sapiens OX=9606 GN=USP9X PE=1 SV=4	Homo sapiens	2	3	3	1.2	290.46	2554	0	20.923	94163	0	70	0			755
Q9H223	EH domain-containing protein 4	EHD4	EHD4	sp|Q9H223|EHD4_HUMAN EH domain-containing protein 4 OS=Homo sapiens OX=9606 GN=EHD4 PE=1 SV=1	Homo sapiens	1	1	1	2.8	61.174	541	0	14.37	92981	0	70	0			784
Q29RF7	Sister chromatid cohesion protein PDS5 homolog A	PDS5A	PDS5A	sp|Q29RF7|PDS5A_HUMAN Sister chromatid cohesion protein PDS5 homolog A OS=Homo sapiens OX=9606 GN=PDS5A PE=1 SV=1	Homo sapiens	1	1	1	1	150.83	1337	0	19.083	92551	0	70	0			701
P62266;D6RD47	40S ribosomal protein S23	RPS23	RPS23	sp|P62266|RS23_HUMAN 40S ribosomal protein S23 OS=Homo sapiens OX=9606 GN=RPS23 PE=1 SV=3;tr|D6RD47|D6RD47_HUMAN 40S ribosomal protein S23 OS=Homo sapiens OX=9606 GN=RPS23 PE=1 SV=1	Homo sapiens	2	2	2	16.1	15.807	143	0	16.385	92427	0	70	0			607
P62906	60S ribosomal protein L10a	RPL10A	RPL10A	sp|P62906|RL10A_HUMAN 60S ribosomal protein L10a OS=Homo sapiens OX=9606 GN=RPL10A PE=1 SV=2	Homo sapiens	1	1	1	3.7	24.831	217	0	11.003	92056	0	70	0			616
F8W930;Q9Y6M1	Insulin-like growth factor 2 mRNA-binding protein 2	IGF2BP2	IGF2BP2	tr|F8W930|F8W930_HUMAN Insulin-like growth factor 2 mRNA-binding protein 2 OS=Homo sapiens OX=9606 GN=IGF2BP2 PE=1 SV=1;sp|Q9Y6M1|IF2B2_HUMAN Insulin-like growth factor 2 mRNA-binding protein 2 OS=Homo sapiens OX=9606 GN=IGF2BP2 PE=1 SV=2	Homo sapiens	2	3	2	7.6	66.785	605	0	13.9	91733	0	70	0			269
P27694	Replication protein A 70 kDa DNA-binding subunit;Replication protein A 70 kDa DNA-binding subunit, N-terminally processed	RPA1	RPA1	sp|P27694|RFA1_HUMAN Replication protein A 70 kDa DNA-binding subunit OS=Homo sapiens OX=9606 GN=RPA1 PE=1 SV=2	Homo sapiens	1	1	1	2.3	68.137	616	0	14.599	89404	0	70	0			513
P47929	Galectin-7	LGALS7	LGALS7	sp|P47929|LEG7_HUMAN Galectin-7 OS=Homo sapiens OX=9606 GN=LGALS7 PE=1 SV=2	Homo sapiens	1	2	2	18.4	15.075	136	0	13.906	88312	0	70	0			557
M0QYH0;Q8NBJ5	Procollagen galactosyltransferase 1	COLGALT1	COLGALT1	tr|M0QYH0|M0QYH0_HUMAN Procollagen galactosyltransferase 1 (Fragment) OS=Homo sapiens OX=9606 GN=COLGALT1 PE=1 SV=1;sp|Q8NBJ5|GT251_HUMAN Procollagen galactosyltransferase 1 OS=Homo sapiens OX=9606 GN=COLGALT1 PE=1 SV=1	Homo sapiens	2	1	1	5.8	16.061	138	0.0028129	6.384	84885	0	70	0			363
O00483	Cytochrome c oxidase subunit NDUFA4	NDUFA4	NDUFA4	sp|O00483|NDUA4_HUMAN Cytochrome c oxidase subunit NDUFA4 OS=Homo sapiens OX=9606 GN=NDUFA4 PE=1 SV=1	Homo sapiens	1	1	1	12.3	9.3697	81	0.0053262	6.0776	83999	0	70	0			379
A0A2R8YGP5;A0A2R8YGG3;A0A2R8Y7S2;A0A2R8Y4P4;Q9HBD4;A0A0A0MT49;P51532;A0A0U1RQE1;A0A2R8Y4R6;A0A2R8YFV8;A0A2R8YCY3;A0A2R8Y523;A0A2R8YDA1;A0A2R8Y6V2;A0A2R8Y4C5;A0A2R8YF58;A0A2R8Y526;A0A2R8Y7Y7;A0A2R8YF80;A0A2R8Y6N0;A0A2R8Y7F3;A0A2R8Y440;A0A2R8YG32;A0A0U1RQZ9;P51531	Transcription activator BRG1;Probable global transcription activator SNF2L2	SMARCA4;SMARCA2	SMARCA4	tr|A0A2R8YGP5|A0A2R8YGP5_HUMAN Transcription activator BRG1 (Fragment) OS=Homo sapiens OX=9606 GN=SMARCA4 PE=1 SV=1;tr|A0A2R8YGG3|A0A2R8YGG3_HUMAN Transcription activator BRG1 (Fragment) OS=Homo sapiens OX=9606 GN=SMARCA4 PE=1 SV=1;tr|A0A2R8Y7S2|A0A2R8Y7S2	Homo sapiens	25	2	2	2.5	129.51	1165	0	14.221	82601	0	70	0			43
A0A0A0MSW0;Q5T4S7;X6RE05	E3 ubiquitin-protein ligase UBR4	UBR4	UBR4	tr|A0A0A0MSW0|A0A0A0MSW0_HUMAN E3 ubiquitin-protein ligase UBR4 (Fragment) OS=Homo sapiens OX=9606 GN=UBR4 PE=1 SV=1;sp|Q5T4S7|UBR4_HUMAN E3 ubiquitin-protein ligase UBR4 OS=Homo sapiens OX=9606 GN=UBR4 PE=1 SV=1;tr|X6RE05|X6RE05_HUMAN E3 ubiquitin-protein	Homo sapiens	3	2	2	1.7	225.01	2058	0	12.759	81309	0	70	0			41
J3KMX5;P62277;E9PS50	40S ribosomal protein S13	RPS13	RPS13	tr|J3KMX5|J3KMX5_HUMAN 40S ribosomal protein S13 OS=Homo sapiens OX=9606 GN=RPS13 PE=1 SV=1;sp|P62277|RS13_HUMAN 40S ribosomal protein S13 OS=Homo sapiens OX=9606 GN=RPS13 PE=1 SV=2;tr|E9PS50|E9PS50_HUMAN 40S ribosomal protein S13 (Fragment) OS=Homo sapien	Homo sapiens	3	2	2	16.2	16.733	148	0	11	81231	0	70	0			318
A0A0A0MR50;A0A669KAX4;K4DI93;Q13619;Q13620	Cullin-4A;Cullin-4B	CUL4A;CUL4B	CUL4A	tr|A0A0A0MR50|A0A0A0MR50_HUMAN Cullin-4A OS=Homo sapiens OX=9606 GN=CUL4A PE=1 SV=1;tr|A0A669KAX4|A0A669KAX4_HUMAN Cullin-4B OS=Homo sapiens OX=9606 GN=CUL4B PE=1 SV=1;tr|K4DI93|K4DI93_HUMAN Cullin 4B, isoform CRA_e OS=Homo sapiens OX=9606 GN=CUL4B PE=1 SV	Homo sapiens	5	1	1	1.6	77.719	667	0	8.7905	80007	0	70	0			36
I3L297;P46108	Adapter molecule crk	CRK	CRK	tr|I3L297|I3L297_HUMAN Adapter molecule crk OS=Homo sapiens OX=9606 GN=CRK PE=1 SV=1;sp|P46108|CRK_HUMAN Adapter molecule crk OS=Homo sapiens OX=9606 GN=CRK PE=1 SV=2	Homo sapiens	2	1	1	8.1	25.503	223	0	7.0553	78364	0	70	0			314
P00492	Hypoxanthine-guanine phosphoribosyltransferase	HPRT1	HPRT1	sp|P00492|HPRT_HUMAN Hypoxanthine-guanine phosphoribosyltransferase OS=Homo sapiens OX=9606 GN=HPRT1 PE=1 SV=2	Homo sapiens	1	1	1	6	24.579	218	0.005291	6.0339	77071	0	70	0			420
Q8N7H5	RNA polymerase II-associated factor 1 homolog	PAF1	PAF1	sp|Q8N7H5|PAF1_HUMAN RNA polymerase II-associated factor 1 homolog OS=Homo sapiens OX=9606 GN=PAF1 PE=1 SV=2	Homo sapiens	1	1	1	4.9	59.975	531	0.0077419	5.9332	75983	0	70	0			742
E9PIL8;E9PJT3;E9PJ04;H0YCG1;E9PPJ0;Q13435	Splicing factor 3B subunit 2	SF3B2	SF3B2	tr|E9PIL8|E9PIL8_HUMAN Splicing factor 3B subunit 2 (Fragment) OS=Homo sapiens OX=9606 GN=SF3B2 PE=1 SV=8;tr|E9PJT3|E9PJT3_HUMAN Splicing factor 3B subunit 2 (Fragment) OS=Homo sapiens OX=9606 GN=SF3B2 PE=1 SV=1;tr|E9PJ04|E9PJ04_HUMAN Splicing factor 3B su	Homo sapiens	6	1	1	15	8.3608	80	0	6.9216	73341	0	70	0			239
Q96P70	Importin-9	IPO9	IPO9	sp|Q96P70|IPO9_HUMAN Importin-9 OS=Homo sapiens OX=9606 GN=IPO9 PE=1 SV=3	Homo sapiens	1	2	2	2.8	115.96	1041	0	13.225	73156	0	70	0			762
Q9BTZ2;P0CG22	Dehydrogenase/reductase SDR family member 4;Putative dehydrogenase/reductase SDR family member 4-like 1	DHRS4;DHRS4L1	DHRS4	sp|Q9BTZ2|DHRS4_HUMAN Dehydrogenase/reductase SDR family member 4 OS=Homo sapiens OX=9606 GN=DHRS4 PE=1 SV=3;sp|P0CG22|DR4L1_HUMAN Putative dehydrogenase/reductase SDR family member 4-like 1 OS=Homo sapiens OX=9606 GN=DHRS4L1 PE=5 SV=1	Homo sapiens	2	1	1	3.2	29.537	278	0.0078227	5.9701	72921	0	70	0			448
F5GYQ2;F5GX77;Q9UI30	Multifunctional methyltransferase subunit TRM112-like protein	TRMT112	TRMT112	tr|F5GYQ2|F5GYQ2_HUMAN Multifunctional methyltransferase subunit TRM112-like protein OS=Homo sapiens OX=9606 GN=TRMT112 PE=1 SV=1;tr|F5GX77|F5GX77_HUMAN Multifunctional methyltransferase subunit TRM112-like protein OS=Homo sapiens OX=9606 GN=TRMT112 PE=1 S	Homo sapiens	3	1	1	17.3	9.2555	81	0	8.2972	72610	0	70	0			251
P56537;B7ZBH1;A0A0U1RQV5	Eukaryotic translation initiation factor 6	EIF6	EIF6	sp|P56537|IF6_HUMAN Eukaryotic translation initiation factor 6 OS=Homo sapiens OX=9606 GN=EIF6 PE=1 SV=1;tr|B7ZBH1|B7ZBH1_HUMAN Eukaryotic translation initiation factor 6 (Fragment) OS=Homo sapiens OX=9606 GN=EIF6 PE=1 SV=1;tr|A0A0U1RQV5|A0A0U1RQV5_HUMAN U	Homo sapiens	3	2	2	13.9	26.599	245	0	15.812	66983	0	70	0			588
Q13185;C9JMM0;B8ZZ43;S4R2Y4	Chromobox protein homolog 3	CBX3	CBX3	sp|Q13185|CBX3_HUMAN Chromobox protein homolog 3 OS=Homo sapiens OX=9606 GN=CBX3 PE=1 SV=4;tr|C9JMM0|C9JMM0_HUMAN Chromobox protein homolog 3 (Fragment) OS=Homo sapiens OX=9606 GN=CBX3 PE=1 SV=1;tr|B8ZZ43|B8ZZ43_HUMAN Chromobox homolog 3 (HP1 gamma homolog	Homo sapiens	4	2	1	16.4	20.811	183	0	19.269	66786	0	70	0			662
Q9Y678;H0Y8X7	Coatomer subunit gamma-1	COPG1	COPG1	sp|Q9Y678|COPG1_HUMAN Coatomer subunit gamma-1 OS=Homo sapiens OX=9606 GN=COPG1 PE=1 SV=1	Homo sapiens	2	5	3	8.2	97.717	874	0	19.314	66099	0	70	0			825
H3BNV7;Q9Y3D0;J3KS95	Mitotic spindle-associated MMXD complex subunit MIP18	FAM96B	FAM96B	tr|H3BNV7|H3BNV7_HUMAN Cytosolic iron-sulfur assembly component 2B (Fragment) OS=Homo sapiens OX=9606 GN=CIAO2B PE=1 SV=1;sp|Q9Y3D0|CIA2B_HUMAN Cytosolic iron-sulfur assembly component 2B OS=Homo sapiens OX=9606 GN=CIAO2B PE=1 SV=1;tr|J3KS95|J3KS95_HUMAN C	Homo sapiens	3	2	2	26.7	17.461	161	0	11.178	66070	0	70	0			303
J3KN16;Q5VYK3	Proteasome-associated protein ECM29 homolog	KIAA0368;ECM29	KIAA0368	tr|J3KN16|J3KN16_HUMAN Proteasome adapter and scaffold protein ECM29 OS=Homo sapiens OX=9606 GN=ECPAS PE=1 SV=1;sp|Q5VYK3|ECM29_HUMAN Proteasome adapter and scaffold protein ECM29 OS=Homo sapiens OX=9606 GN=ECPAS PE=1 SV=2	Homo sapiens	2	1	1	0.6	223.69	2017	0	12	65815	0	70	0			319
P25705;K7EK77;K7ESA0;K7EQH4;K7EJP1;K7ENJ4;K7ERX7	ATP synthase subunit alpha, mitochondrial	ATP5A1	ATP5A1	sp|P25705|ATPA_HUMAN ATP synthase subunit alpha, mitochondrial OS=Homo sapiens OX=9606 GN=ATP5F1A PE=1 SV=1;tr|K7EK77|K7EK77_HUMAN ATP synthase subunit alpha, mitochondrial (Fragment) OS=Homo sapiens OX=9606 GN=ATP5F1A PE=1 SV=1	Homo sapiens	7	4	4	10.8	59.75	553	0	26.865	65293	0	70	0			505
P61026	Ras-related protein Rab-10	RAB10	RAB10	sp|P61026|RAB10_HUMAN Ras-related protein Rab-10 OS=Homo sapiens OX=9606 GN=RAB10 PE=1 SV=1	Homo sapiens	1	1	1	6	22.541	200	0.0053476	6.0983	64718	0	70	0			595
H0YLA2;P37108	Signal recognition particle 14 kDa protein	SRP14	SRP14	tr|H0YLA2|H0YLA2_HUMAN Signal recognition particle 14 kDa protein OS=Homo sapiens OX=9606 GN=SRP14 PE=1 SV=1;sp|P37108|SRP14_HUMAN Signal recognition particle 14 kDa protein OS=Homo sapiens OX=9606 GN=SRP14 PE=1 SV=2	Homo sapiens	2	1	1	12.2	13.058	115	0	18.649	63189	0	70	0			299
Q02878;F8VR69;F8VZ45;U3KQR5	60S ribosomal protein L6	RPL6	RPL6	sp|Q02878|RL6_HUMAN 60S ribosomal protein L6 OS=Homo sapiens OX=9606 GN=RPL6 PE=1 SV=3;tr|F8VR69|F8VR69_HUMAN 60S ribosomal protein L6 (Fragment) OS=Homo sapiens OX=9606 GN=RPL6 PE=1 SV=8;tr|F8VZ45|F8VZ45_HUMAN 60S ribosomal protein L6 (Fragment) OS=Homo s	Homo sapiens	4	2	2	12.2	32.728	288	0	14.832	62039	0	70	0			640
M0R2L9;M0QYF7;M0R140;P39019	40S ribosomal protein S19	RPS19	RPS19	tr|M0R2L9|M0R2L9_HUMAN 40S ribosomal protein S19 (Fragment) OS=Homo sapiens OX=9606 GN=RPS19 PE=1 SV=1;tr|M0QYF7|M0QYF7_HUMAN 40S ribosomal protein S19 (Fragment) OS=Homo sapiens OX=9606 GN=RPS19 PE=1 SV=1;tr|M0R140|M0R140_HUMAN 40S ribosomal protein S19 (	Homo sapiens	4	1	1	12.7	8.1894	71	0.0027894	6.3609	61186	0	70	0			362
I3L397;I3L504;Q6IS14;P63241	Eukaryotic translation initiation factor 5A;Eukaryotic translation initiation factor 5A-1-like;Eukaryotic translation initiation factor 5A-1	EIF5A;EIF5AL1	EIF5A	tr|I3L397|I3L397_HUMAN Eukaryotic translation initiation factor 5A (Fragment) OS=Homo sapiens OX=9606 GN=EIF5A PE=1 SV=8;tr|I3L504|I3L504_HUMAN Eukaryotic translation initiation factor 5A-1 OS=Homo sapiens OX=9606 GN=EIF5A PE=1 SV=1;sp|Q6IS14|IF5AL_HUMAN E	Homo sapiens	4	1	1	17.8	16.019	146	0	7.3372	60498	0	70	0			315
G3V2D2;G3V540;G3V5L0;G3V2Y4;G3V4W5;P34896;P34897	Serine hydroxymethyltransferase;Serine hydroxymethyltransferase, cytosolic;Serine hydroxymethyltransferase, mitochondrial	SHMT2;SHMT1	SHMT2	tr|G3V2D2|G3V2D2_HUMAN Glycine hydroxymethyltransferase OS=Homo sapiens OX=9606 GN=SHMT2 PE=1 SV=1;tr|G3V540|G3V540_HUMAN Glycine hydroxymethyltransferase OS=Homo sapiens OX=9606 GN=SHMT2 PE=1 SV=1;tr|G3V5L0|G3V5L0_HUMAN Glycine hydroxymethyltransferase (F	Homo sapiens	7	1	1	26.9	5.7736	52	0.0027397	6.2308	59452	0	70	0			276
Q9UHV9	Prefoldin subunit 2	PFDN2	PFDN2	sp|Q9UHV9|PFD2_HUMAN Prefoldin subunit 2 OS=Homo sapiens OX=9606 GN=PFDN2 PE=1 SV=1	Homo sapiens	1	1	1	9.1	16.648	154	0.005298	6.0484	58343	0	70	0			805
Q32MZ4	Leucine-rich repeat flightless-interacting protein 1	LRRFIP1	LRRFIP1	sp|Q32MZ4|LRRF1_HUMAN Leucine-rich repeat flightless-interacting protein 1 OS=Homo sapiens OX=9606 GN=LRRFIP1 PE=1 SV=2	Homo sapiens	1	2	2	3.8	89.252	808	0	16.188	58319	0	70	0			702
P55058	Phospholipid transfer protein	PLTP	PLTP	sp|P55058|PLTP_HUMAN Phospholipid transfer protein OS=Homo sapiens OX=9606 GN=PLTP PE=1 SV=1	Homo sapiens	1	1	1	3	54.739	493	1	-2	56289	0	70	0	+		582
P49915	GMP synthase [glutamine-hydrolyzing]	GMPS	GMPS	sp|P49915|GUAA_HUMAN GMP synthase [glutamine-hydrolyzing] OS=Homo sapiens OX=9606 GN=GMPS PE=1 SV=1	Homo sapiens	1	2	2	4.5	76.715	693	0	13.377	55527	0	70	0			565
D6RBD7;C9J1V9;O43324	Eukaryotic translation elongation factor 1 epsilon-1	EEF1E1;EEF1E1-BLOC1S5	EEF1E1	tr|D6RBD7|D6RBD7_HUMAN Eukaryotic translation elongation factor 1 epsilon-1 OS=Homo sapiens OX=9606 GN=EEF1E1 PE=1 SV=1;tr|C9J1V9|C9J1V9_HUMAN EEF1E1-BLOC1S5 readthrough (NMD candidate) OS=Homo sapiens OX=9606 GN=EEF1E1-BLOC1S5 PE=4 SV=2;sp|O43324|MCA3_HUM	Homo sapiens	3	1	1	7.3	16.686	150	0.002751	6.2819	55210	0	70	0			167
P25398	40S ribosomal protein S12	RPS12	RPS12	sp|P25398|RS12_HUMAN 40S ribosomal protein S12 OS=Homo sapiens OX=9606 GN=RPS12 PE=1 SV=3	Homo sapiens	1	1	1	16.7	14.515	132	0.0014347	6.4775	54867	0	70	0			503
F8WF32;P04843	Dolichyl-diphosphooligosaccharide--protein glycosyltransferase subunit 1	RPN1	RPN1	tr|F8WF32|F8WF32_HUMAN Dolichyl-diphosphooligosaccharide--protein glycosyltransferase subunit 1 OS=Homo sapiens OX=9606 GN=RPN1 PE=1 SV=1;sp|P04843|RPN1_HUMAN Dolichyl-diphosphooligosaccharide--protein glycosyltransferase subunit 1 OS=Homo sapiens OX=9606	Homo sapiens	2	1	1	12.4	12.695	121	0.0065274	5.9713	54064	0	70	0			274
F8VR50;C9JZD1;O15145	Actin-related protein 2/3 complex subunit 3	ARPC3	ARPC3	tr|F8VR50|F8VR50_HUMAN Actin-related protein 2/3 complex subunit 3 (Fragment) OS=Homo sapiens OX=9606 GN=ARPC3 PE=1 SV=1;tr|C9JZD1|C9JZD1_HUMAN Actin-related protein 2/3 complex subunit 3 (Fragment) OS=Homo sapiens OX=9606 GN=ARPC3 PE=1 SV=1;sp|O15145|ARPC	Homo sapiens	3	1	1	13.1	9.7261	84	0.005284	6.033	53304	0	70	0			179
B7Z7P8;P62495;D6RCB3;D6RJE8;I3L492	Eukaryotic peptide chain release factor subunit 1	ETF1	ETF1	tr|B7Z7P8|B7Z7P8_HUMAN Eukaryotic peptide chain release factor subunit 1 OS=Homo sapiens OX=9606 GN=ETF1 PE=1 SV=1;sp|P62495|ERF1_HUMAN Eukaryotic peptide chain release factor subunit 1 OS=Homo sapiens OX=9606 GN=ETF1 PE=1 SV=3	Homo sapiens	5	3	3	15.1	47.475	423	0	35.775	52027	0	70	0			157
F8VZU9;G3V1Y7;F8VPF3;F8W1R7;J3KND3;G8JLA2;G3V1V0;F8W180;B7Z6Z4;P60660	Myosin light polypeptide 6	MYL6	MYL6	tr|F8VZU9|F8VZU9_HUMAN Myosin light polypeptide 6 OS=Homo sapiens OX=9606 GN=MYL6 PE=1 SV=1;tr|G3V1Y7|G3V1Y7_HUMAN Myosin light polypeptide 6 OS=Homo sapiens OX=9606 GN=MYL6 PE=1 SV=1;tr|F8VPF3|F8VPF3_HUMAN Myosin light polypeptide 6 (Fragment) OS=Homo sap	Homo sapiens	10	1	1	15.5	11.677	103	1	-2	45738	0	70	0	+		156
Q6P1Q5;B0YIW6;P48444	Coatomer subunit delta	ARCN1	ARCN1	tr|Q6P1Q5|Q6P1Q5_HUMAN Coatomer subunit delta OS=Homo sapiens OX=9606 GN=ARCN1 PE=1 SV=1;tr|B0YIW6|B0YIW6_HUMAN Coatomer subunit delta OS=Homo sapiens OX=9606 GN=ARCN1 PE=1 SV=1;sp|P48444|COPD_HUMAN Coatomer subunit delta OS=Homo sapiens OX=9606 GN=ARCN1 P	Homo sapiens	3	1	1	6.3	21.854	189	0	8.899	42824	0	70	0			133
P61006	Ras-related protein Rab-8A	RAB8A	RAB8A	sp|P61006|RAB8A_HUMAN Ras-related protein Rab-8A OS=Homo sapiens OX=9606 GN=RAB8A PE=1 SV=1	Homo sapiens	1	1	1	5.8	23.668	207	0.0014388	6.4869	38231	0	70	0			594
Q96EL3	39S ribosomal protein L53, mitochondrial	MRPL53	MRPL53	sp|Q96EL3|RM53_HUMAN 39S ribosomal protein L53, mitochondrial OS=Homo sapiens OX=9606 GN=MRPL53 PE=1 SV=1	Homo sapiens	1	1	1	8.9	12.107	112	0.0040214	6.1125	32650	0	70	0			757
C9JPM4;P18085;F5H0C7;C9J1Z8;C9JAK5;F5H423;P84085;P84077;P61204;F5H1V1;F5H6T5;F8WDB3	ADP-ribosylation factor 4;ADP-ribosylation factor 5;ADP-ribosylation factor 1;ADP-ribosylation factor 3	ARF4;ARF3;ARF5;ARF1	ARF4	tr|C9JPM4|C9JPM4_HUMAN ADP-ribosylation factor 4 (Fragment) OS=Homo sapiens OX=9606 GN=ARF4 PE=1 SV=1;sp|P18085|ARF4_HUMAN ADP-ribosylation factor 4 OS=Homo sapiens OX=9606 GN=ARF4 PE=1 SV=3;tr|F5H0C7|F5H0C7_HUMAN ADP-ribosylation factor 3 (Fragment) OS=Ho	Homo sapiens	12	3	3	30.7	14.553	127	0	20.33	28054	0	70	0			175
P22735	Protein-glutamine gamma-glutamyltransferase K	TGM1	TGM1	sp|P22735|TGM1_HUMAN Protein-glutamine gamma-glutamyltransferase K OS=Homo sapiens OX=9606 GN=TGM1 PE=1 SV=4	Homo sapiens	1	1	1	2	89.786	817	0.0027972	6.3634	21975	0	70	0			496
A0A087WTP3;Q92945;M0QXW7;M0QYH3	Far upstream element-binding protein 2	KHSRP	KHSRP	tr|A0A087WTP3|A0A087WTP3_HUMAN Far upstream element-binding protein 2 OS=Homo sapiens OX=9606 GN=KHSRP PE=1 SV=1;sp|Q92945|FUBP2_HUMAN Far upstream element-binding protein 2 OS=Homo sapiens OX=9606 GN=KHSRP PE=1 SV=4;tr|M0QXW7|M0QXW7_HUMAN Far upstream ele	Homo sapiens	4	2	2	3.2	73.027	711	0	17.964	0	0	70	0			7
A0A087WVR3;A0A087WTW0;Q96T88	E3 ubiquitin-protein ligase UHRF1	UHRF1	UHRF1	tr|A0A087WVR3|A0A087WVR3_HUMAN RING-type E3 ubiquitin transferase OS=Homo sapiens OX=9606 GN=UHRF1 PE=1 SV=1;tr|A0A087WTW0|A0A087WTW0_HUMAN RING-type E3 ubiquitin transferase OS=Homo sapiens OX=9606 GN=UHRF1 PE=1 SV=1;sp|Q96T88|UHRF1_HUMAN E3 ubiquitin-pro	Homo sapiens	3	1	1	1.2	91.099	806	0	12.557	0	0	70	0			8
A0A0B4J2E5;Q15269	Periodic tryptophan protein 2 homolog	PWP2	PWP2	tr|A0A0B4J2E5|A0A0B4J2E5_HUMAN Uncharacterized protein OS=Homo sapiens OX=9606 GN=LOC102724159 PE=1 SV=1;sp|Q15269|PWP2_HUMAN Periodic tryptophan protein 2 homolog OS=Homo sapiens OX=9606 GN=PWP2 PE=2 SV=2	Homo sapiens	2	1	1	1.7	102.45	919	0.0014327	6.4773	0	0	70	0			45
A0A0D9SEM9;K7EPJ3;K7EN69		DDX39A	DDX39A	tr|A0A0D9SEM9|A0A0D9SEM9_HUMAN ATP-dependent RNA helicase DDX39A (Fragment) OS=Homo sapiens OX=9606 GN=DDX39A PE=1 SV=1;tr|K7EPJ3|K7EPJ3_HUMAN RNA helicase (Fragment) OS=Homo sapiens OX=9606 GN=DDX39A PE=1 SV=1	Homo sapiens	3	4	1	42.7	10.925	96	1	-2	0	0	70	0	+		53
A0A1B0GVT7;A0A6I8PRV1;O75486	Transcription initiation protein SPT3 homolog	SUPT3H	SUPT3H	tr|A0A1B0GVT7|A0A1B0GVT7_HUMAN Transcription initiation protein SPT3 homolog OS=Homo sapiens OX=9606 GN=SUPT3H PE=1 SV=1;tr|A0A6I8PRV1|A0A6I8PRV1_HUMAN Transcription initiation protein SPT3 homolog OS=Homo sapiens OX=9606 GN=SUPT3H PE=1 SV=1;sp|O75486|SUPT	Homo sapiens	3	1	1	3.9	29.241	255	1	-2	0	0	70	0	+		65
F8W6P5;A0A2R8Y7R2;P68871	Hemoglobin subunit beta;LVV-hemorphin-7;Spinorphin	HBB	HBB	tr|F8W6P5|F8W6P5_HUMAN Hemoglobin subunit beta (Fragment) OS=Homo sapiens OX=9606 GN=HBB PE=1 SV=1;tr|A0A2R8Y7R2|A0A2R8Y7R2_HUMAN Hemoglobin subunit beta OS=Homo sapiens OX=9606 GN=HBB PE=1 SV=1;sp|P68871|HBB_HUMAN Hemoglobin subunit beta OS=Homo sapiens O	Homo sapiens	3	1	1	14.4	9.67	90	0.0052356	5.9848	0	0	70	0			81
H3BLU7;A0A499FJT0;Q8NHP1;O43488	Aflatoxin B1 aldehyde reductase member 4;Aflatoxin B1 aldehyde reductase member 2	AKR7A2;AKR7L	AKR7A2	tr|H3BLU7|H3BLU7_HUMAN Aflatoxin B1 aldehyde reductase member 2 (Fragment) OS=Homo sapiens OX=9606 GN=AKR7A2 PE=1 SV=1;tr|A0A499FJT0|A0A499FJT0_HUMAN Aflatoxin B1 aldehyde reductase member 4 OS=Homo sapiens OX=9606 GN=AKR7L PE=1 SV=1;sp|Q8NHP1|ARK74_HUMAN	Homo sapiens	4	1	1	4.8	34.684	314	0	6.7361	0	0	70	0			101
F8VSB2;F8VNY2;A0A5F9ZHB6;P49642	DNA primase;DNA primase small subunit	PRIM1	PRIM1	tr|F8VSB2|F8VSB2_HUMAN DNA primase small subunit OS=Homo sapiens OX=9606 GN=PRIM1 PE=1 SV=1;tr|F8VNY2|F8VNY2_HUMAN DNA primase (Fragment) OS=Homo sapiens OX=9606 GN=PRIM1 PE=1 SV=8;tr|A0A5F9ZHB6|A0A5F9ZHB6_HUMAN DNA primase OS=Homo sapiens OX=9606 GN=PRIM1	Homo sapiens	4	1	1	7.6	21.856	185	1	-2	0	0	70	0	+		107
A0A6Q8PF69;A0A6Q8PGR0;A0A6Q8PHA0;A0A6Q8PFN8;A0A6Q8PH48;A0A6Q8PHI5;A0A6Q8PFB7;A0A6Q8PEX6;A0A6Q8PG86;A0A6Q8PFH9;A0A6Q8PHF4;A0A6Q8PHC9;O95163;A0A6Q8PFX1;A0A6Q8PFC8;H0YDF3;A0A6Q8PH36;A0A6Q8PGC4;A0A6Q8PGA6;F5H2T0;A0A6Q8PGW3;A0A6Q8PF66	Elongator complex protein 1	IKBKAP	IKBKAP	tr|A0A6Q8PF69|A0A6Q8PF69_HUMAN IkappaB kinase complex-associated protein OS=Homo sapiens OX=9606 GN=ELP1 PE=1 SV=1;tr|A0A6Q8PGR0|A0A6Q8PGR0_HUMAN IkappaB kinase complex-associated protein OS=Homo sapiens OX=9606 GN=ELP1 PE=1 SV=1;tr|A0A6Q8PHA0|A0A6Q8PHA0_H	Homo sapiens	22	2	2	3.5	90.907	810	0	12.514	0	0	70	0			111
A0A6Q8PFY3;Q9BXW9	Fanconi anemia group D2 protein	FANCD2	FANCD2	tr|A0A6Q8PFY3|A0A6Q8PFY3_HUMAN Fanconi anemia group D2 protein (Fragment) OS=Homo sapiens OX=9606 GN=FANCD2 PE=1 SV=1;sp|Q9BXW9|FACD2_HUMAN Fanconi anemia group D2 protein OS=Homo sapiens OX=9606 GN=FANCD2 PE=1 SV=2	Homo sapiens	2	1	1	1	159.91	1414	0.0014306	6.4761	0	0	70	0			115
A6NHK2;P62304	Small nuclear ribonucleoprotein E	SNRPE	SNRPE	tr|A6NHK2|A6NHK2_HUMAN Small nuclear ribonucleoprotein E OS=Homo sapiens OX=9606 GN=SNRPE PE=1 SV=1;sp|P62304|RUXE_HUMAN Small nuclear ribonucleoprotein E OS=Homo sapiens OX=9606 GN=SNRPE PE=1 SV=1	Homo sapiens	2	1	1	23.1	5.9248	52	0	7.7811	0	0	70	0			124
A6NHU4		AKR1C1	AKR1C1	tr|A6NHU4|A6NHU4_HUMAN Aldo-keto reductase family 1 member C1 OS=Homo sapiens OX=9606 GN=AKR1C1 PE=1 SV=1	Homo sapiens	1	1	1	9.8	23.228	205	1	-2	0	0	70	0	+		125
B4DIW9;O15084	Serine/threonine-protein phosphatase 6 regulatory ankyrin repeat subunit A	ANKRD28	ANKRD28	tr|B4DIW9|B4DIW9_HUMAN Serine/threonine-protein phosphatase 6 regulatory ankyrin repeat subunit A OS=Homo sapiens OX=9606 GN=ANKRD28 PE=1 SV=1;sp|O15084|ANR28_HUMAN Serine/threonine-protein phosphatase 6 regulatory ankyrin repeat subunit A OS=Homo sapiens	Homo sapiens	2	1	1	2.2	77.746	722	0.0052701	6.0084	0	0	70	0			146
B5MBZ8;C9JD73;C9J177;H7C003;Q15435	Protein phosphatase 1 regulatory subunit 7	PPP1R7	PPP1R7	tr|B5MBZ8|B5MBZ8_HUMAN Protein phosphatase 1 regulatory subunit 7 OS=Homo sapiens OX=9606 GN=PPP1R7 PE=1 SV=1;tr|C9JD73|C9JD73_HUMAN Protein phosphatase 1 regulatory subunit 7 (Fragment) OS=Homo sapiens OX=9606 GN=PPP1R7 PE=1 SV=1;tr|C9J177|C9J177_HUMAN Pr	Homo sapiens	5	1	1	6.6	31.357	274	0.0014556	6.6107	0	0	70	0			152
D6RJH8;E5RHU2;B7Z8R2;Q8WV60	Pentatricopeptide repeat-containing protein 2, mitochondrial	PTCD2	PTCD2	tr|D6RJH8|D6RJH8_HUMAN Pentatricopeptide repeat-containing protein 2, mitochondrial OS=Homo sapiens OX=9606 GN=PTCD2 PE=4 SV=1;tr|E5RHU2|E5RHU2_HUMAN Pentatricopeptide repeat-containing protein 2, mitochondrial OS=Homo sapiens OX=9606 GN=PTCD2 PE=1 SV=1;tr	Homo sapiens	4	1	1	20.3	7.7648	74	1	-2	0	0	70	0	+		158
C9JD32;B9ZVP7;J3KT29;P62829	60S ribosomal protein L23	RPL23	RPL23	tr|C9JD32|C9JD32_HUMAN 60S ribosomal protein L23 (Fragment) OS=Homo sapiens OX=9606 GN=RPL23 PE=1 SV=1;tr|B9ZVP7|B9ZVP7_HUMAN 60S ribosomal protein L23 OS=Homo sapiens OX=9606 GN=RPL23 PE=1 SV=1;tr|J3KT29|J3KT29_HUMAN 60S ribosomal protein L23 OS=Homo sapi	Homo sapiens	4	1	1	22	9.6694	91	0.0040323	6.1328	0	0	70	0			163
C9JBY0;Q9H8M2	Bromodomain-containing protein 9	BRD9	BRD9	tr|C9JBY0|C9JBY0_HUMAN Bromodomain-containing protein 9 (Fragment) OS=Homo sapiens OX=9606 GN=BRD9 PE=1 SV=1;sp|Q9H8M2|BRD9_HUMAN Bromodomain-containing protein 9 OS=Homo sapiens OX=9606 GN=BRD9 PE=1 SV=2	Homo sapiens	2	1	1	10.2	25.559	225	1	-2	0	0	70	0	+		170
D6R9P3;D6RD18;D6RBZ0		HNRNPAB	HNRNPAB	tr|D6R9P3|D6R9P3_HUMAN Heterogeneous nuclear ribonucleoprotein A/B OS=Homo sapiens OX=9606 GN=HNRNPAB PE=1 SV=1;tr|D6RD18|D6RD18_HUMAN Heterogeneous nuclear ribonucleoprotein A/B OS=Homo sapiens OX=9606 GN=HNRNPAB PE=1 SV=1;tr|D6RBZ0|D6RBZ0_HUMAN Heterogen	Homo sapiens	3	1	1	5	30.302	280	0.0077519	5.935	0	0	70	0			205
E5RJK4;E5RFM8;Q8TCX1	Cytoplasmic dynein 2 light intermediate chain 1	DYNC2LI1	DYNC2LI1	tr|E5RJK4|E5RJK4_HUMAN Cytoplasmic dynein 2 light intermediate chain 1 OS=Homo sapiens OX=9606 GN=DYNC2LI1 PE=1 SV=1;tr|E5RFM8|E5RFM8_HUMAN Cytoplasmic dynein 2 light intermediate chain 1 OS=Homo sapiens OX=9606 GN=DYNC2LI1 PE=1 SV=1;sp|Q8TCX1|DC2L1_HUMAN	Homo sapiens	3	1	1	22.2	7.9389	72	1	-2	0	0	70	0	+		213
E5RHJ2;E5RHK2;G3XAN5;E5RG29;E5RG56;Q12797	Aspartyl/asparaginyl beta-hydroxylase	ASPH	ASPH	tr|E5RHJ2|E5RHJ2_HUMAN Aspartyl/asparaginyl beta-hydroxylase OS=Homo sapiens OX=9606 GN=ASPH PE=1 SV=1;tr|E5RHK2|E5RHK2_HUMAN Aspartyl/asparaginyl beta-hydroxylase (Fragment) OS=Homo sapiens OX=9606 GN=ASPH PE=1 SV=1;tr|G3XAN5|G3XAN5_HUMAN Aspartate beta-h	Homo sapiens	6	1	1	15.9	11.787	113	0.001443	6.4986	0	0	70	0			214
E5RIZ8;P05937	Calbindin	CALB1	CALB1	tr|E5RIZ8|E5RIZ8_HUMAN Calbindin (Fragment) OS=Homo sapiens OX=9606 GN=CALB1 PE=1 SV=1;sp|P05937|CALB1_HUMAN Calbindin OS=Homo sapiens OX=9606 GN=CALB1 PE=1 SV=2	Homo sapiens	2	1	1	14.3	13.969	119	1	-2	0	0	70	0	+		219
E7ESC6;Q9UIA9	Exportin-7	XPO7	XPO7	tr|E7ESC6|E7ESC6_HUMAN Exportin-7 OS=Homo sapiens OX=9606 GN=XPO7 PE=1 SV=1;sp|Q9UIA9|XPO7_HUMAN Exportin-7 OS=Homo sapiens OX=9606 GN=XPO7 PE=1 SV=3	Homo sapiens	2	1	1	2.3	124.07	1088	0	7.4187	0	0	70	0			224
F5GY03;P09486	SPARC	SPARC	SPARC	tr|F5GY03|F5GY03_HUMAN Osteonectin (Fragment) OS=Homo sapiens OX=9606 GN=SPARC PE=1 SV=1;sp|P09486|SPRC_HUMAN SPARC OS=Homo sapiens OX=9606 GN=SPARC PE=1 SV=1	Homo sapiens	2	1	1	8.7	17.47	149	0.0027435	6.243	0	0	70	0			253
F5H7C6;F5GYF7;F5H248;Q9UBW8	COP9 signalosome complex subunit 7a	COPS7A	COPS7A	tr|F5H7C6|F5H7C6_HUMAN COP9 signalosome complex subunit 7a (Fragment) OS=Homo sapiens OX=9606 GN=COPS7A PE=1 SV=1;tr|F5GYF7|F5GYF7_HUMAN COP9 signalosome complex subunit 7a (Fragment) OS=Homo sapiens OX=9606 GN=COPS7A PE=1 SV=8;tr|F5H248|F5H248_HUMAN COP9	Homo sapiens	4	1	1	8.3	21.306	192	0	10.445	0	0	70	0			254
F8W543		NAP1L1	NAP1L1	tr|F8W543|F8W543_HUMAN Nucleosome assembly protein 1-like 1 OS=Homo sapiens OX=9606 GN=NAP1L1 PE=1 SV=1	Homo sapiens	1	7	1	26.8	38.2	328	1	-2	0	0	70	0	+		266
F8W883;Q9Y6X6	Unconventional myosin-XVI	MYO16	MYO16	tr|F8W883|F8W883_HUMAN Unconventional myosin-XVI OS=Homo sapiens OX=9606 GN=MYO16 PE=1 SV=2;sp|Q9Y6X6|MYO16_HUMAN Unconventional myosin-XVI OS=Homo sapiens OX=9606 GN=MYO16 PE=1 SV=3	Homo sapiens	2	1	1	1.5	208.84	1880	1	-2	0	0	70	0	+		267
H0YBX6;Q15819	Ubiquitin-conjugating enzyme E2 variant 2	UBE2V2	UBE2V2	tr|H0YBX6|H0YBX6_HUMAN Ubiquitin-conjugating enzyme E2 variant 2 (Fragment) OS=Homo sapiens OX=9606 GN=UBE2V2 PE=1 SV=1;sp|Q15819|UB2V2_HUMAN Ubiquitin-conjugating enzyme E2 variant 2 OS=Homo sapiens OX=9606 GN=UBE2V2 PE=1 SV=4	Homo sapiens	2	1	1	7.1	16.76	154	1	-2	0	0	70	0	+		290
H0YDJ3;Q13523	Serine/threonine-protein kinase PRP4 homolog	PRPF4B	PRPF4B	tr|H0YDJ3|H0YDJ3_HUMAN PRP4 pre-mRNA-processing factor 4 homolog (Fragment) OS=Homo sapiens OX=9606 GN=PRPF4B PE=1 SV=1;sp|Q13523|PRP4B_HUMAN Serine/threonine-protein kinase PRP4 homolog OS=Homo sapiens OX=9606 GN=PRPF4B PE=1 SV=3	Homo sapiens	2	1	1	2.4	68.4	587	0.0014409	6.4904	0	0	70	0			291
H0YLP6;H0YMF4;H0YKD8;P46779	60S ribosomal protein L28	RPL28	RPL28	tr|H0YLP6|H0YLP6_HUMAN 60S ribosomal protein L28 OS=Homo sapiens OX=9606 GN=RPL28 PE=1 SV=1;tr|H0YMF4|H0YMF4_HUMAN 60S ribosomal protein L28 OS=Homo sapiens OX=9606 GN=RPL28 PE=1 SV=1;tr|H0YKD8|H0YKD8_HUMAN 60S ribosomal protein L28 OS=Homo sapiens OX=9606	Homo sapiens	4	1	1	14.6	9.657	89	0.002736	6.2198	0	0	70	0			296
H0YMC9;H0YLM6;Q9P253	Vacuolar protein sorting-associated protein 18 homolog	VPS18	VPS18	tr|H0YMC9|H0YMC9_HUMAN Vacuolar protein sorting-associated protein 18 homolog OS=Homo sapiens OX=9606 GN=VPS18 PE=1 SV=1;tr|H0YLM6|H0YLM6_HUMAN Vacuolar protein sorting-associated protein 18 homolog OS=Homo sapiens OX=9606 GN=VPS18 PE=1 SV=1;sp|Q9P253|VPS1	Homo sapiens	3	1	1	10.7	13.133	121	0.0014641	6.6795	0	0	70	0			300
H7BY94;Q13895	Bystin	BYSL	BYSL	tr|H7BY94|H7BY94_HUMAN Bystin (Fragment) OS=Homo sapiens OX=9606 GN=BYSL PE=1 SV=1;sp|Q13895|BYST_HUMAN Bystin OS=Homo sapiens OX=9606 GN=BYSL PE=1 SV=3	Homo sapiens	2	1	1	4.9	20.89	183	0	9.0578	0	0	70	0			310
J3KNC0;P52655	Transcription initiation factor IIA subunit 1;Transcription initiation factor IIA alpha chain;Transcription initiation factor IIA beta chain	GTF2A1	GTF2A1	tr|J3KNC0|J3KNC0_HUMAN Transcription initiation factor IIA subunit 1 OS=Homo sapiens OX=9606 GN=GTF2A1 PE=1 SV=1;sp|P52655|TF2AA_HUMAN Transcription initiation factor IIA subunit 1 OS=Homo sapiens OX=9606 GN=GTF2A1 PE=1 SV=1	Homo sapiens	2	1	1	18.6	6.7407	59	0.0014577	6.6492	0	0	70	0			321
K7EII7;P51570	Galactokinase	GALK1	GALK1	tr|K7EII7|K7EII7_HUMAN Galactokinase (Fragment) OS=Homo sapiens OX=9606 GN=GALK1 PE=1 SV=1;sp|P51570|GALK1_HUMAN Galactokinase OS=Homo sapiens OX=9606 GN=GALK1 PE=1 SV=1	Homo sapiens	2	1	1	6	20.14	184	0	17.282	0	0	70	0			330
K7ENZ6;K7EMF4;K7ELM8;K7EJ34;K7ENF4;Q86VR2	Protein FAM134C	FAM134C	FAM134C	tr|K7ENZ6|K7ENZ6_HUMAN Reticulophagy regulator 3 OS=Homo sapiens OX=9606 GN=RETREG3 PE=1 SV=1;tr|K7EMF4|K7EMF4_HUMAN Reticulophagy regulator 3 OS=Homo sapiens OX=9606 GN=RETREG3 PE=1 SV=1;tr|K7ELM8|K7ELM8_HUMAN Reticulophagy regulator 3 OS=Homo sapiens OX=	Homo sapiens	6	1	1	18.8	8.7247	80	0.0027322	6.1944	0	0	70	0			332
K7ER83;K7EL81;Q9BZL4	Protein phosphatase 1 regulatory subunit 12C	PPP1R12C	PPP1R12C	tr|K7ER83|K7ER83_HUMAN Protein phosphatase 1 regulatory subunit 12C (Fragment) OS=Homo sapiens OX=9606 GN=PPP1R12C PE=1 SV=1;tr|K7EL81|K7EL81_HUMAN Protein phosphatase 1 regulatory subunit 12C (Fragment) OS=Homo sapiens OX=9606 GN=PPP1R12C PE=1 SV=1;sp|Q9B	Homo sapiens	3	1	1	4.3	26.658	234	0.0014535	6.606	0	0	70	0			337
Q3KNT2;K7ERX2;O00321	ETS translocation variant 2	ETV2	ETV2	tr|Q3KNT2|Q3KNT2_HUMAN ETS translocation variant 2 OS=Homo sapiens OX=9606 GN=ETV2 PE=2 SV=1;tr|K7ERX2|K7ERX2_HUMAN ETS translocation variant 2 OS=Homo sapiens OX=9606 GN=ETV2 PE=3 SV=1;sp|O00321|ETV2_HUMAN ETS translocation variant 2 OS=Homo sapiens OX=96	Homo sapiens	3	1	1	6.5	17.563	155	0.0027248	6.1849	0	0	70	0			343
M0R0P7;M0R3D6;M0R1A7;M0R117;Q02543	60S ribosomal protein L18a	RPL18A	RPL18A	tr|M0R0P7|M0R0P7_HUMAN 60S ribosomal protein L18a OS=Homo sapiens OX=9606 GN=RPL18A PE=1 SV=1;tr|M0R3D6|M0R3D6_HUMAN 60S ribosomal protein L18a (Fragment) OS=Homo sapiens OX=9606 GN=RPL18A PE=1 SV=1;tr|M0R1A7|M0R1A7_HUMAN 60S ribosomal protein L18a OS=Homo	Homo sapiens	5	1	1	9.5	16.177	137	0	7.2403	0	0	70	0			368
O00425	Insulin-like growth factor 2 mRNA-binding protein 3	IGF2BP3	IGF2BP3	sp|O00425|IF2B3_HUMAN Insulin-like growth factor 2 mRNA-binding protein 3 OS=Homo sapiens OX=9606 GN=IGF2BP3 PE=1 SV=2	Homo sapiens	1	3	1	6.7	63.704	579	0.007722	5.8972	0	0	70	0			378
O60684;O15131;P52294	Importin subunit alpha-7;Importin subunit alpha-6;Importin subunit alpha-5;Importin subunit alpha-5, N-terminally processed	KPNA6;KPNA5;KPNA1	KPNA6	sp|O60684|IMA7_HUMAN Importin subunit alpha-7 OS=Homo sapiens OX=9606 GN=KPNA6 PE=1 SV=1;sp|O15131|IMA6_HUMAN Importin subunit alpha-6 OS=Homo sapiens OX=9606 GN=KPNA5 PE=1 SV=2;sp|P52294|IMA5_HUMAN Importin subunit alpha-5 OS=Homo sapiens OX=9606 GN=KPNA1	Homo sapiens	3	1	1	2.6	60.029	536	0	38.914	0	0	70	0			390
O75489	NADH dehydrogenase [ubiquinone] iron-sulfur protein 3, mitochondrial	NDUFS3	NDUFS3	sp|O75489|NDUS3_HUMAN NADH dehydrogenase [ubiquinone] iron-sulfur protein 3, mitochondrial OS=Homo sapiens OX=9606 GN=NDUFS3 PE=1 SV=1	Homo sapiens	1	1	1	6.4	30.241	264	0.0027816	6.3491	0	0	70	0			409
P13861;H7C330;H7C1L0	cAMP-dependent protein kinase type II-alpha regulatory subunit	PRKAR2A	PRKAR2A	sp|P13861|KAP2_HUMAN cAMP-dependent protein kinase type II-alpha regulatory subunit OS=Homo sapiens OX=9606 GN=PRKAR2A PE=1 SV=2;tr|H7C330|H7C330_HUMAN cAMP-dependent protein kinase type II-alpha regulatory subunit (Fragment) OS=Homo sapiens OX=9606 GN=PRK	Homo sapiens	3	2	2	5	45.518	404	0	10.84	0	0	70	0			469
P13995	Bifunctional methylenetetrahydrofolate dehydrogenase/cyclohydrolase, mitochondrial;NAD-dependent methylenetetrahydrofolate dehydrogenase;Methenyltetrahydrofolate cyclohydrolase	MTHFD2	MTHFD2	sp|P13995|MTDC_HUMAN Bifunctional methylenetetrahydrofolate dehydrogenase/cyclohydrolase, mitochondrial OS=Homo sapiens OX=9606 GN=MTHFD2 PE=1 SV=2	Homo sapiens	1	1	1	6.6	37.895	350	0.0078125	5.9698	0	0	70	0			470
P23246	Splicing factor, proline- and glutamine-rich	SFPQ	SFPQ	sp|P23246|SFPQ_HUMAN Splicing factor, proline- and glutamine-rich OS=Homo sapiens OX=9606 GN=SFPQ PE=1 SV=2	Homo sapiens	1	1	1	2.7	76.149	707	0	8.9123	0	0	70	0			497
Q08554	Desmocollin-1	DSC1	DSC1	sp|Q08554|DSC1_HUMAN Desmocollin-1 OS=Homo sapiens OX=9606 GN=DSC1 PE=1 SV=2	Homo sapiens	1	1	1	1.7	99.986	894	0.0028289	6.3933	0	0	70	0			647
Q09161	Nuclear cap-binding protein subunit 1	NCBP1	NCBP1	sp|Q09161|NCBP1_HUMAN Nuclear cap-binding protein subunit 1 OS=Homo sapiens OX=9606 GN=NCBP1 PE=1 SV=1	Homo sapiens	1	1	1	1.4	91.838	790	0	10.278	0	0	70	0			651
Q0VDF9	Heat shock 70 kDa protein 14	HSPA14	HSPA14	sp|Q0VDF9|HSP7E_HUMAN Heat shock 70 kDa protein 14 OS=Homo sapiens OX=9606 GN=HSPA14 PE=1 SV=1	Homo sapiens	1	1	1	2.8	54.794	509	0	7.2414	0	0	70	0			653
Q10570	Cleavage and polyadenylation specificity factor subunit 1	CPSF1	CPSF1	sp|Q10570|CPSF1_HUMAN Cleavage and polyadenylation specificity factor subunit 1 OS=Homo sapiens OX=9606 GN=CPSF1 PE=1 SV=2	Homo sapiens	1	1	1	0.7	160.88	1443	0	12.322	0	0	70	0			654
Q13112	Chromatin assembly factor 1 subunit B	CHAF1B	CHAF1B	sp|Q13112|CAF1B_HUMAN Chromatin assembly factor 1 subunit B OS=Homo sapiens OX=9606 GN=CHAF1B PE=1 SV=1	Homo sapiens	1	1	1	2	61.492	559	0	7.9463	0	0	70	0			661
Q13835	Plakophilin-1	PKP1	PKP1	sp|Q13835|PKP1_HUMAN Plakophilin-1 OS=Homo sapiens OX=9606 GN=PKP1 PE=1 SV=2	Homo sapiens	1	1	1	2.1	82.86	747	0.0027548	6.2891	0	0	70	0			670
Q15691	Microtubule-associated protein RP/EB family member 1	MAPRE1	MAPRE1	sp|Q15691|MARE1_HUMAN Microtubule-associated protein RP/EB family member 1 OS=Homo sapiens OX=9606 GN=MAPRE1 PE=1 SV=3	Homo sapiens	1	1	1	6	29.999	268	0	10.384	0	0	70	0			693
Q5JRA6	Melanoma inhibitory activity protein 3	MIA3	MIA3	sp|Q5JRA6|TGO1_HUMAN Transport and Golgi organization protein 1 homolog OS=Homo sapiens OX=9606 GN=MIA3 PE=1 SV=1	Homo sapiens	1	1	1	0.7	213.7	1907	0.0078023	5.9691	0	0	70	0			709
Q6ZVX7	F-box only protein 50	NCCRP1	NCCRP1	sp|Q6ZVX7|FBX50_HUMAN F-box only protein 50 OS=Homo sapiens OX=9606 GN=NCCRP1 PE=1 SV=1	Homo sapiens	1	1	1	4.4	30.847	275	0	9.7548	0	0	70	0			721
Q7Z2Z2	Elongation factor Tu GTP-binding domain-containing protein 1	EFTUD1	EFTUD1	sp|Q7Z2Z2|EFL1_HUMAN Elongation factor-like GTPase 1 OS=Homo sapiens OX=9606 GN=EFL1 PE=1 SV=2	Homo sapiens	1	1	1	1.4	125.43	1120	0.0028169	6.387	0	0	70	0			727
Q86UA1	Pre-mRNA-processing factor 39	PRPF39	PRPF39	sp|Q86UA1|PRP39_HUMAN Pre-mRNA-processing factor 39 OS=Homo sapiens OX=9606 GN=PRPF39 PE=1 SV=3	Homo sapiens	1	1	1	1.8	78.429	669	0	24.12	0	0	70	0			731
Q8N122	Regulatory-associated protein of mTOR	RPTOR	RPTOR	sp|Q8N122|RPTOR_HUMAN Regulatory-associated protein of mTOR OS=Homo sapiens OX=9606 GN=RPTOR PE=1 SV=1	Homo sapiens	1	1	1	0.7	149.04	1335	0	6.932	0	0	70	0			736
Q8WUM4	Programmed cell death 6-interacting protein	PDCD6IP	PDCD6IP	sp|Q8WUM4|PDC6I_HUMAN Programmed cell death 6-interacting protein OS=Homo sapiens OX=9606 GN=PDCD6IP PE=1 SV=1	Homo sapiens	1	1	1	1.3	96.022	868	0.0014514	6.5626	0	0	70	0			746
Q8WVV4	Protein POF1B	POF1B	POF1B	sp|Q8WVV4|POF1B_HUMAN Protein POF1B OS=Homo sapiens OX=9606 GN=POF1B PE=1 SV=3	Homo sapiens	1	1	1	1.7	68.064	589	0	7.1804	0	0	70	0			747
Q96A33;A0A087WYW6	Coiled-coil domain-containing protein 47	CCDC47	CCDC47	sp|Q96A33|CCD47_HUMAN Coiled-coil domain-containing protein 47 OS=Homo sapiens OX=9606 GN=CCDC47 PE=1 SV=1;tr|A0A087WYW6|A0A087WYW6_HUMAN Coiled-coil domain-containing protein 47 OS=Homo sapiens OX=9606 GN=CCDC47 PE=1 SV=1	Homo sapiens	2	2	2	8.5	55.873	483	0	12.175	0	0	70	0			756
Q96P63	Serpin B12	SERPINB12	SERPINB12	sp|Q96P63|SPB12_HUMAN Serpin B12 OS=Homo sapiens OX=9606 GN=SERPINB12 PE=1 SV=1	Homo sapiens	1	1	1	4	46.276	405	0.0028409	6.3999	0	0	70	0			761
Q9BTY2	Plasma alpha-L-fucosidase	FUCA2	FUCA2	sp|Q9BTY2|FUCO2_HUMAN Plasma alpha-L-fucosidase OS=Homo sapiens OX=9606 GN=FUCA2 PE=1 SV=2	Homo sapiens	1	1	1	3.2	54.066	467	0.0027663	6.3011	0	0	70	0			773
Q9BWT7	Caspase recruitment domain-containing protein 10	CARD10	CARD10	sp|Q9BWT7|CAR10_HUMAN Caspase recruitment domain-containing protein 10 OS=Homo sapiens OX=9606 GN=CARD10 PE=1 SV=2	Homo sapiens	1	1	1	1.8	115.93	1032	1	-2	0	0	70	0	+		777
Q9H0U6	39S ribosomal protein L18, mitochondrial	MRPL18	MRPL18	sp|Q9H0U6|RM18_HUMAN 39S ribosomal protein L18, mitochondrial OS=Homo sapiens OX=9606 GN=MRPL18 PE=1 SV=1	Homo sapiens	1	1	1	5	20.576	180	0.0065359	5.9751	0	0	70	0			782
Q9NQT5	Exosome complex component RRP40	EXOSC3	EXOSC3	sp|Q9NQT5|EXOS3_HUMAN Exosome complex component RRP40 OS=Homo sapiens OX=9606 GN=EXOSC3 PE=1 SV=3	Homo sapiens	1	1	1	5.5	29.572	275	0	29.542	0	0	70	0			790
Q9P278	Folliculin-interacting protein 2	FNIP2	FNIP2	sp|Q9P278|FNIP2_HUMAN Folliculin-interacting protein 2 OS=Homo sapiens OX=9606 GN=FNIP2 PE=1 SV=2	Homo sapiens	1	1	1	1.1	122.11	1114	1	-2	0	0	70	0	+		797
S4R2Z4;Q9UBK9	Protein UXT	UXT	UXT	tr|S4R2Z4|S4R2Z4_HUMAN Protein UXT OS=Homo sapiens OX=9606 GN=UXT PE=1 SV=1;sp|Q9UBK9|UXT_HUMAN Protein UXT OS=Homo sapiens OX=9606 GN=UXT PE=1 SV=1	Homo sapiens	2	1	1	11.1	11.593	99	0	9.3273	0	0	70	0			801
Q9UBS8	E3 ubiquitin-protein ligase RNF14	RNF14	RNF14	sp|Q9UBS8|RNF14_HUMAN E3 ubiquitin-protein ligase RNF14 OS=Homo sapiens OX=9606 GN=RNF14 PE=1 SV=1	Homo sapiens	1	1	1	2.1	53.837	474	0	12.37	0	0	70	0			802
Q9Y3I0	tRNA-splicing ligase RtcB homolog	RTCB	RTCB	sp|Q9Y3I0|RTCB_HUMAN RNA-splicing ligase RtcB homolog OS=Homo sapiens OX=9606 GN=RTCB PE=1 SV=1	Homo sapiens	1	1	1	2.2	55.21	505	0	23.658	0	0	70	0			823
