# Supplementary material for: Process- and product-related impurities in the ChAdOx1 nCov-19 vaccine
Source: eLife journal article supplement (doi:10.7554/elife.78513), 2022-07-04
Supplement: supp [file elife-78513-supp-v1.zip › elife_poa_e78513_Figure_4_source_data_2.pdf]

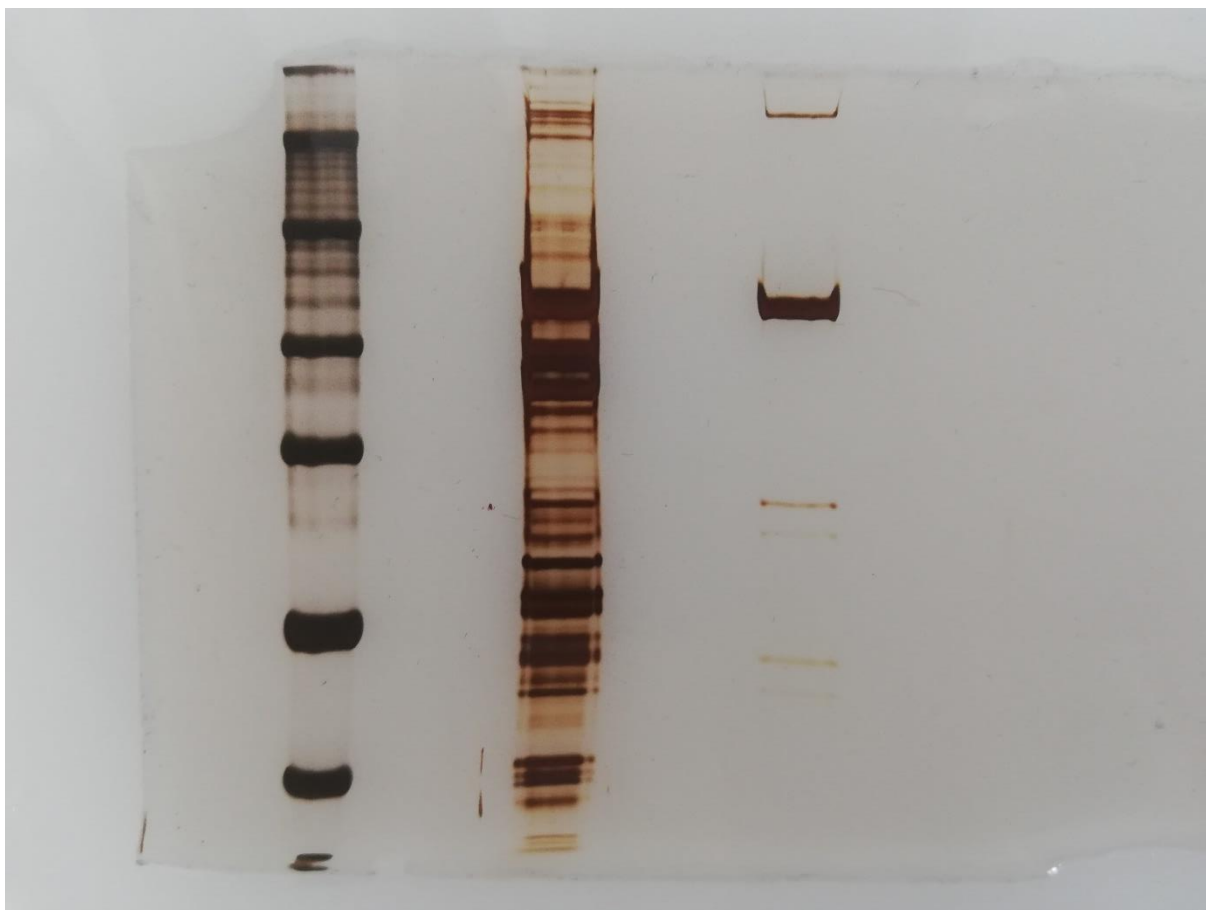

**Figure 4A – source data 1\_Original file of the full raw unedited gel: Protein staining of ChAdOx1 nCoV-19 vaccine lot and UUm ChAdOx1.**  $3 \times 10^9$  adenoviral vector particles were separated by SDS-PAGE under denaturing and reducing conditions. Proteins were visualized by silver staining. Lane 1: Reference protein marker; lane 2: AstraZeneca ChAdOx1 vaccine lot ABV9317 produced by the manufacturer; lane 3: CsCl-purified UUm ChAdOx1.
