# Supplementary material for: Process- and product-related impurities in the ChAdOx1 nCov-19 vaccine
Source: eLife journal article supplement (doi:10.7554/elife.78513), 2022-07-04
Supplement: supp [file elife-78513-supp-v1.zip › elife_poa_e78513_Figure_4_source_data_3.pdf]

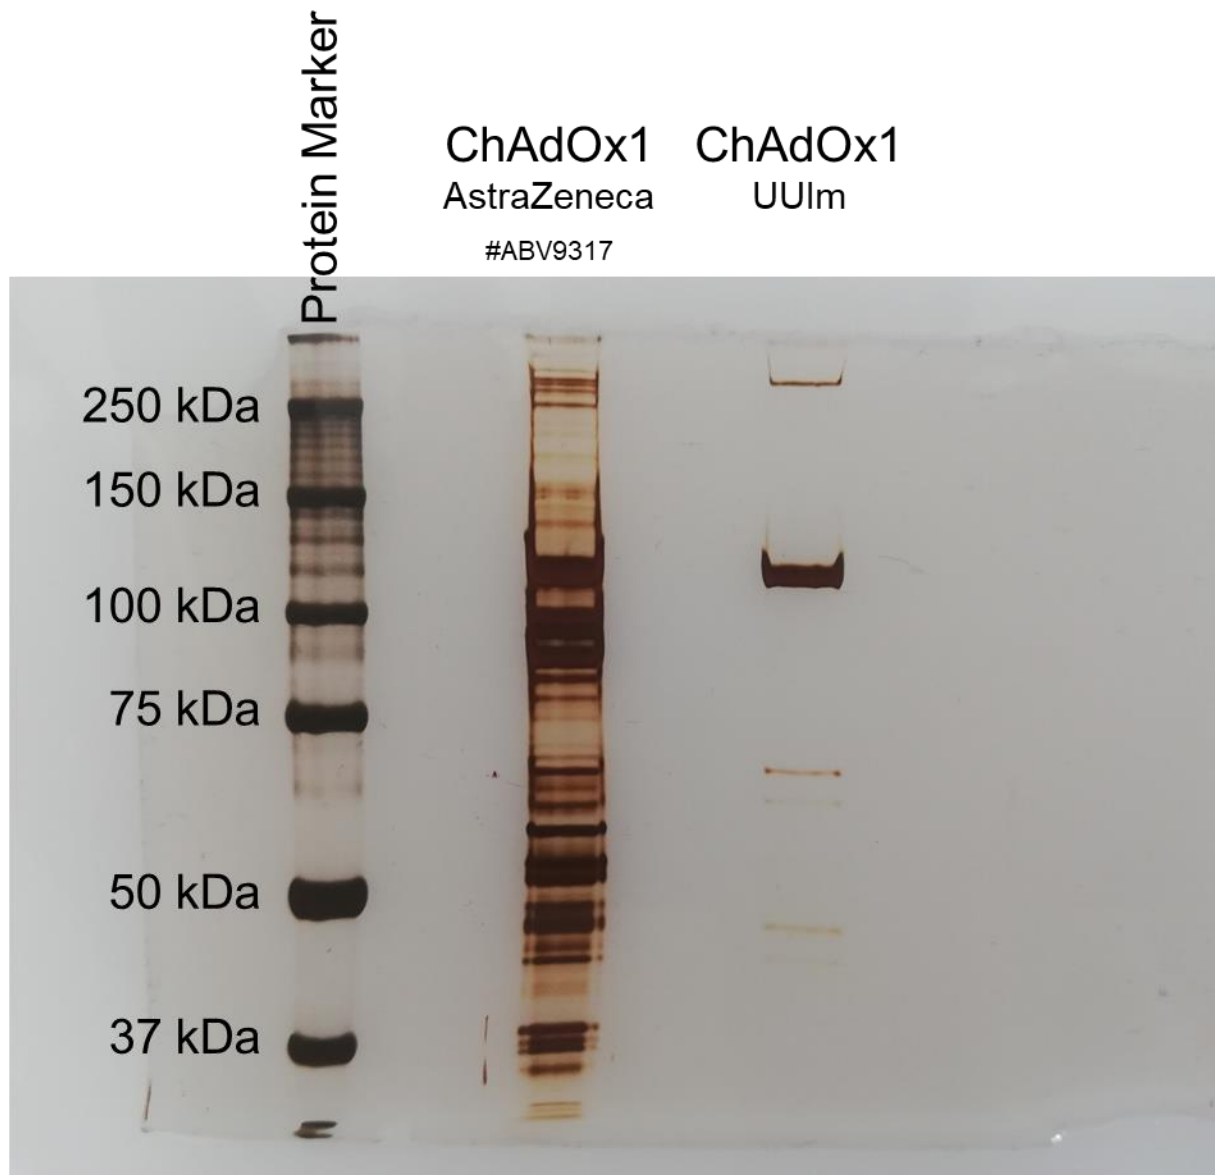

**Figure 4A – source data 2\_ Uncropped gel with the relevant bands labeled:**  
**Protein staining of ChAdOx1 nCoV-19 vaccine lot and UUI ChAdOx1.**  $3 \times 10^9$  adenoviral vector particles were separated by SDS-PAGE under denaturing and reducing conditions. Proteins were visualized by silver staining. Marker bands are labeled. ChAdOx1 ABV9317 was purified by the manufacturer; UUI ChAdOx1 was purified by CsCl density gradient centrifugation.
