# Supplementary figures and images for: Process- and product-related impurities in the ChAdOx1 nCov-19 vaccine
Source: eLife journal article supplement (doi:10.7554/elife.78513), 2022-07-04

Johnson&Johnson  
Ad26.COV2.S  
21C 10-01

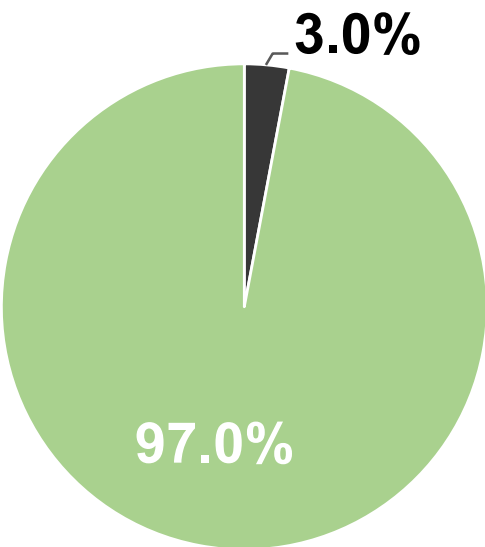

Johnson&Johnson  
Ad26.COV2.S  
XE395

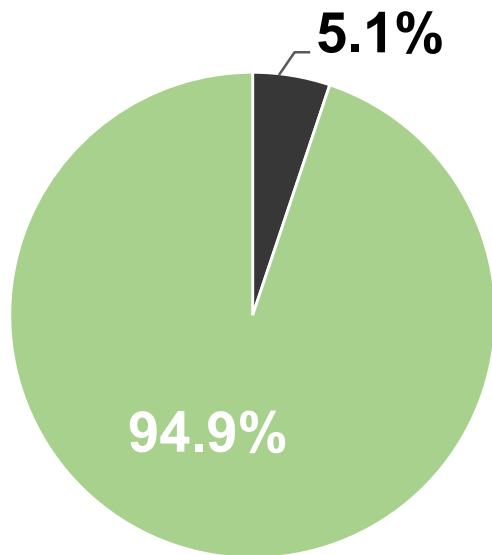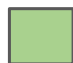

Ad26.COV2.S

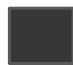

Homo sapiens

Supplement: supp [file elife-78513-supp-v1.zip]

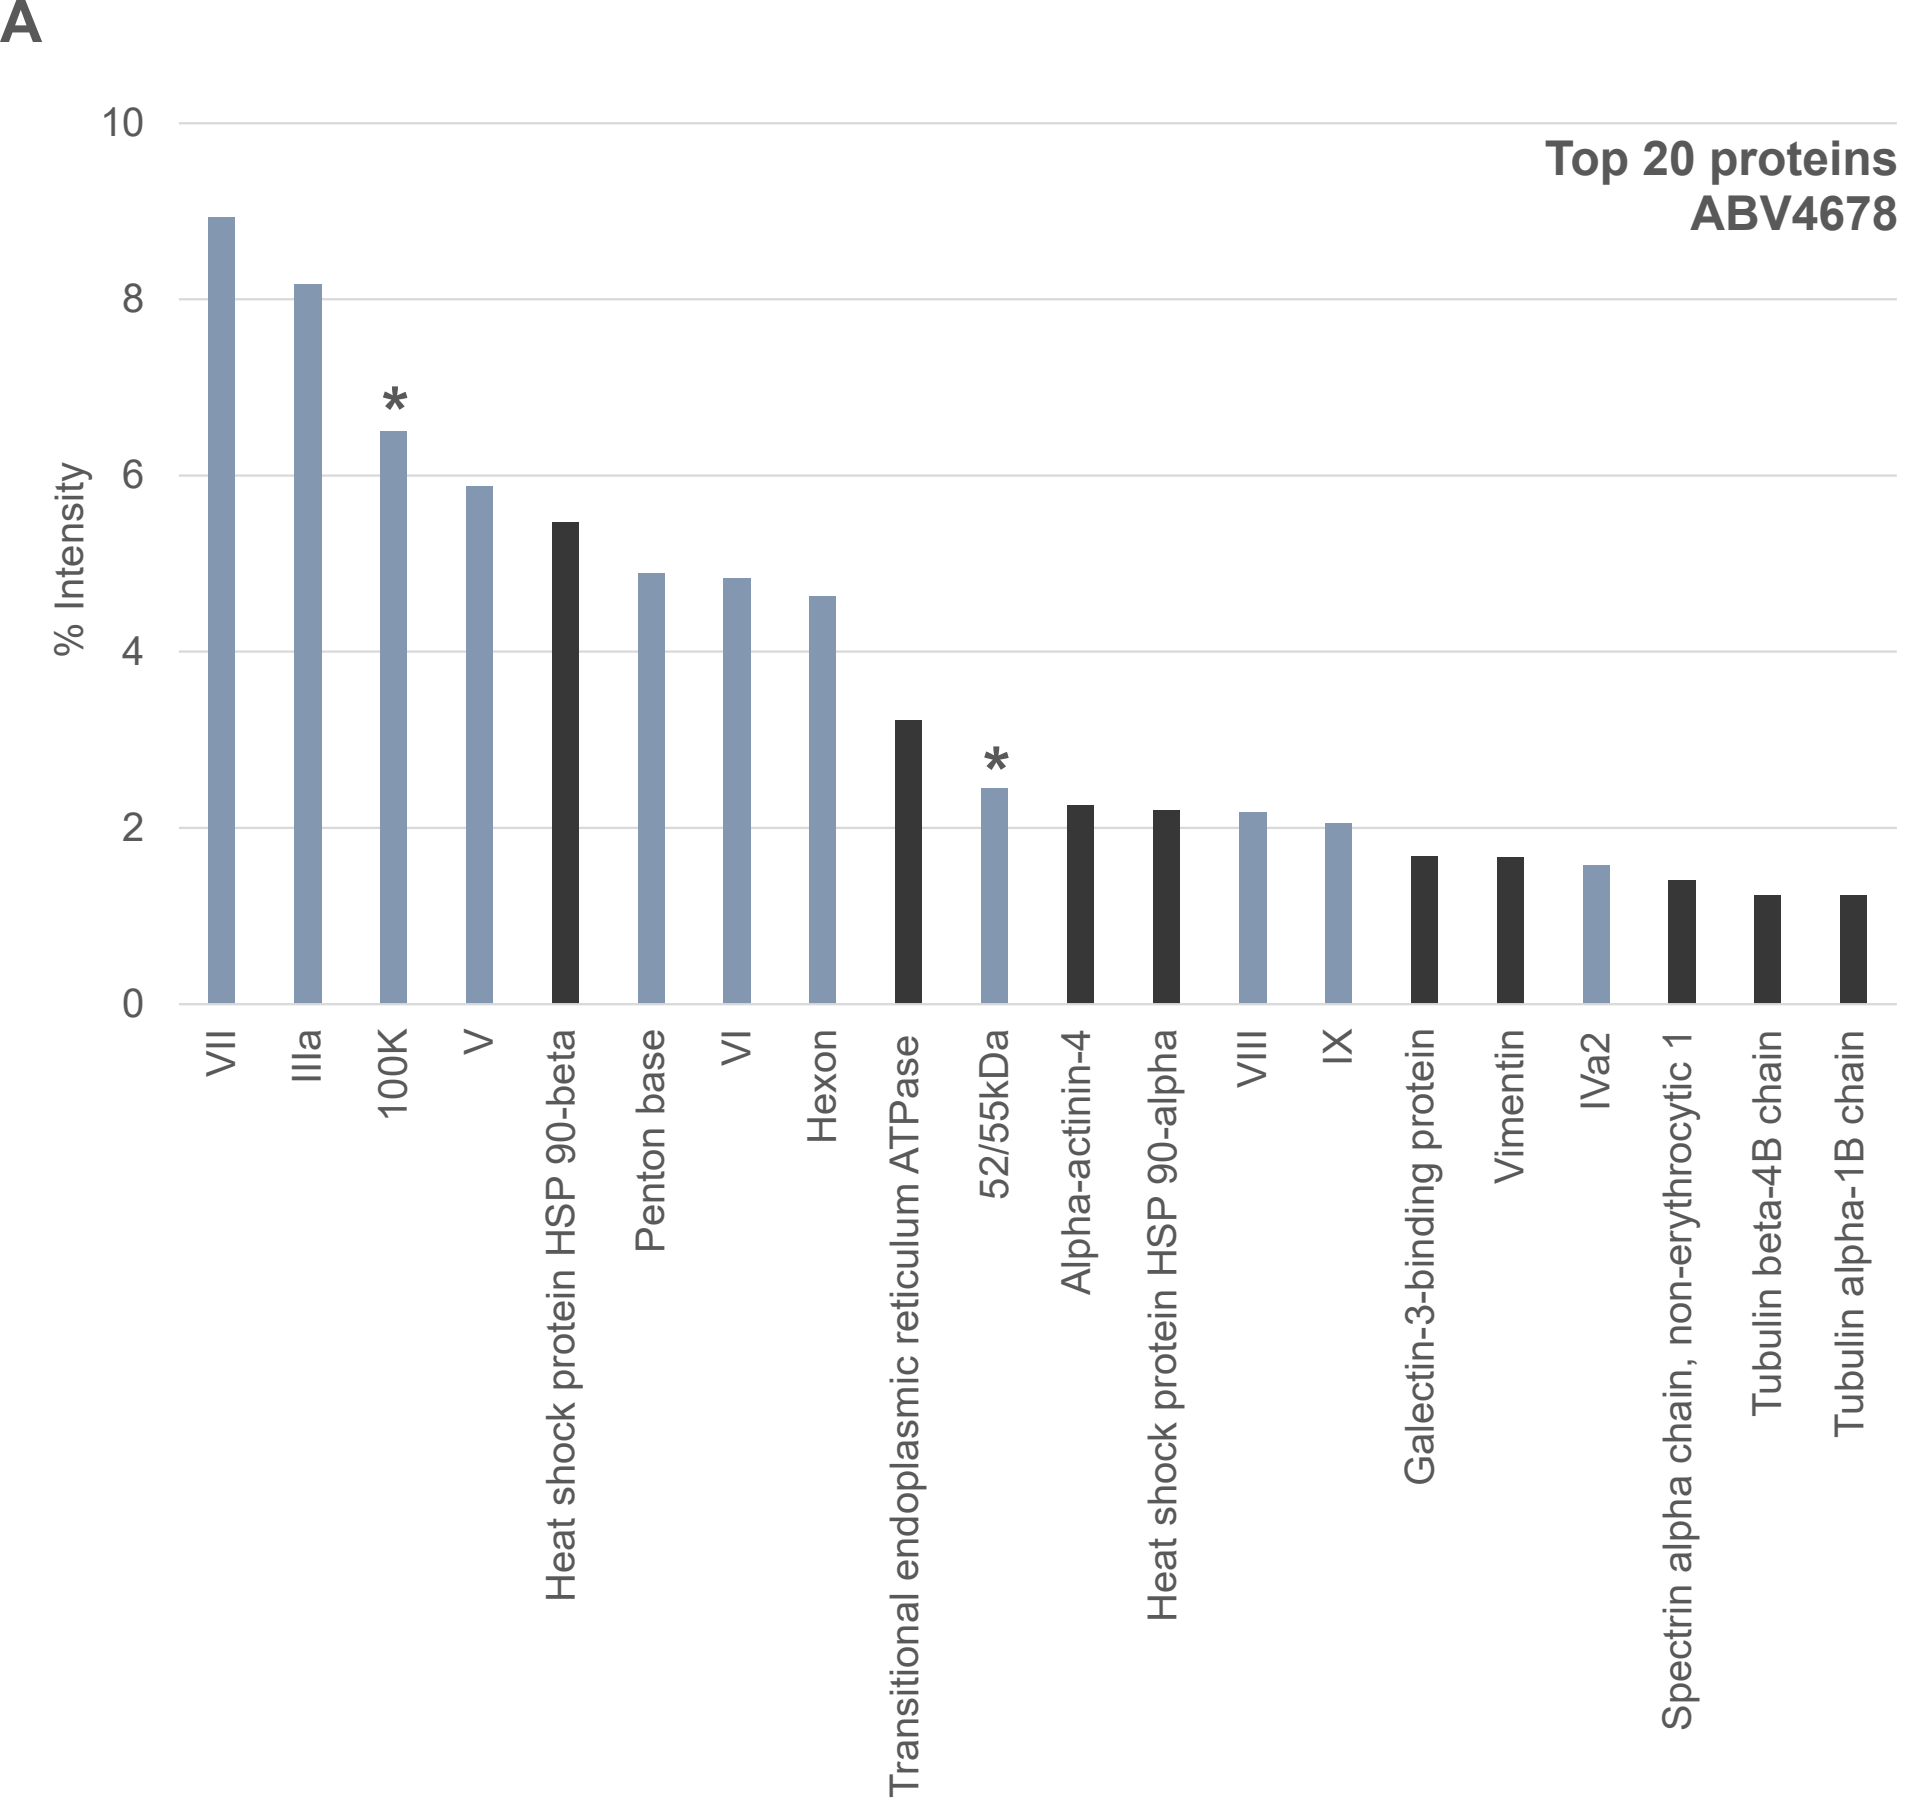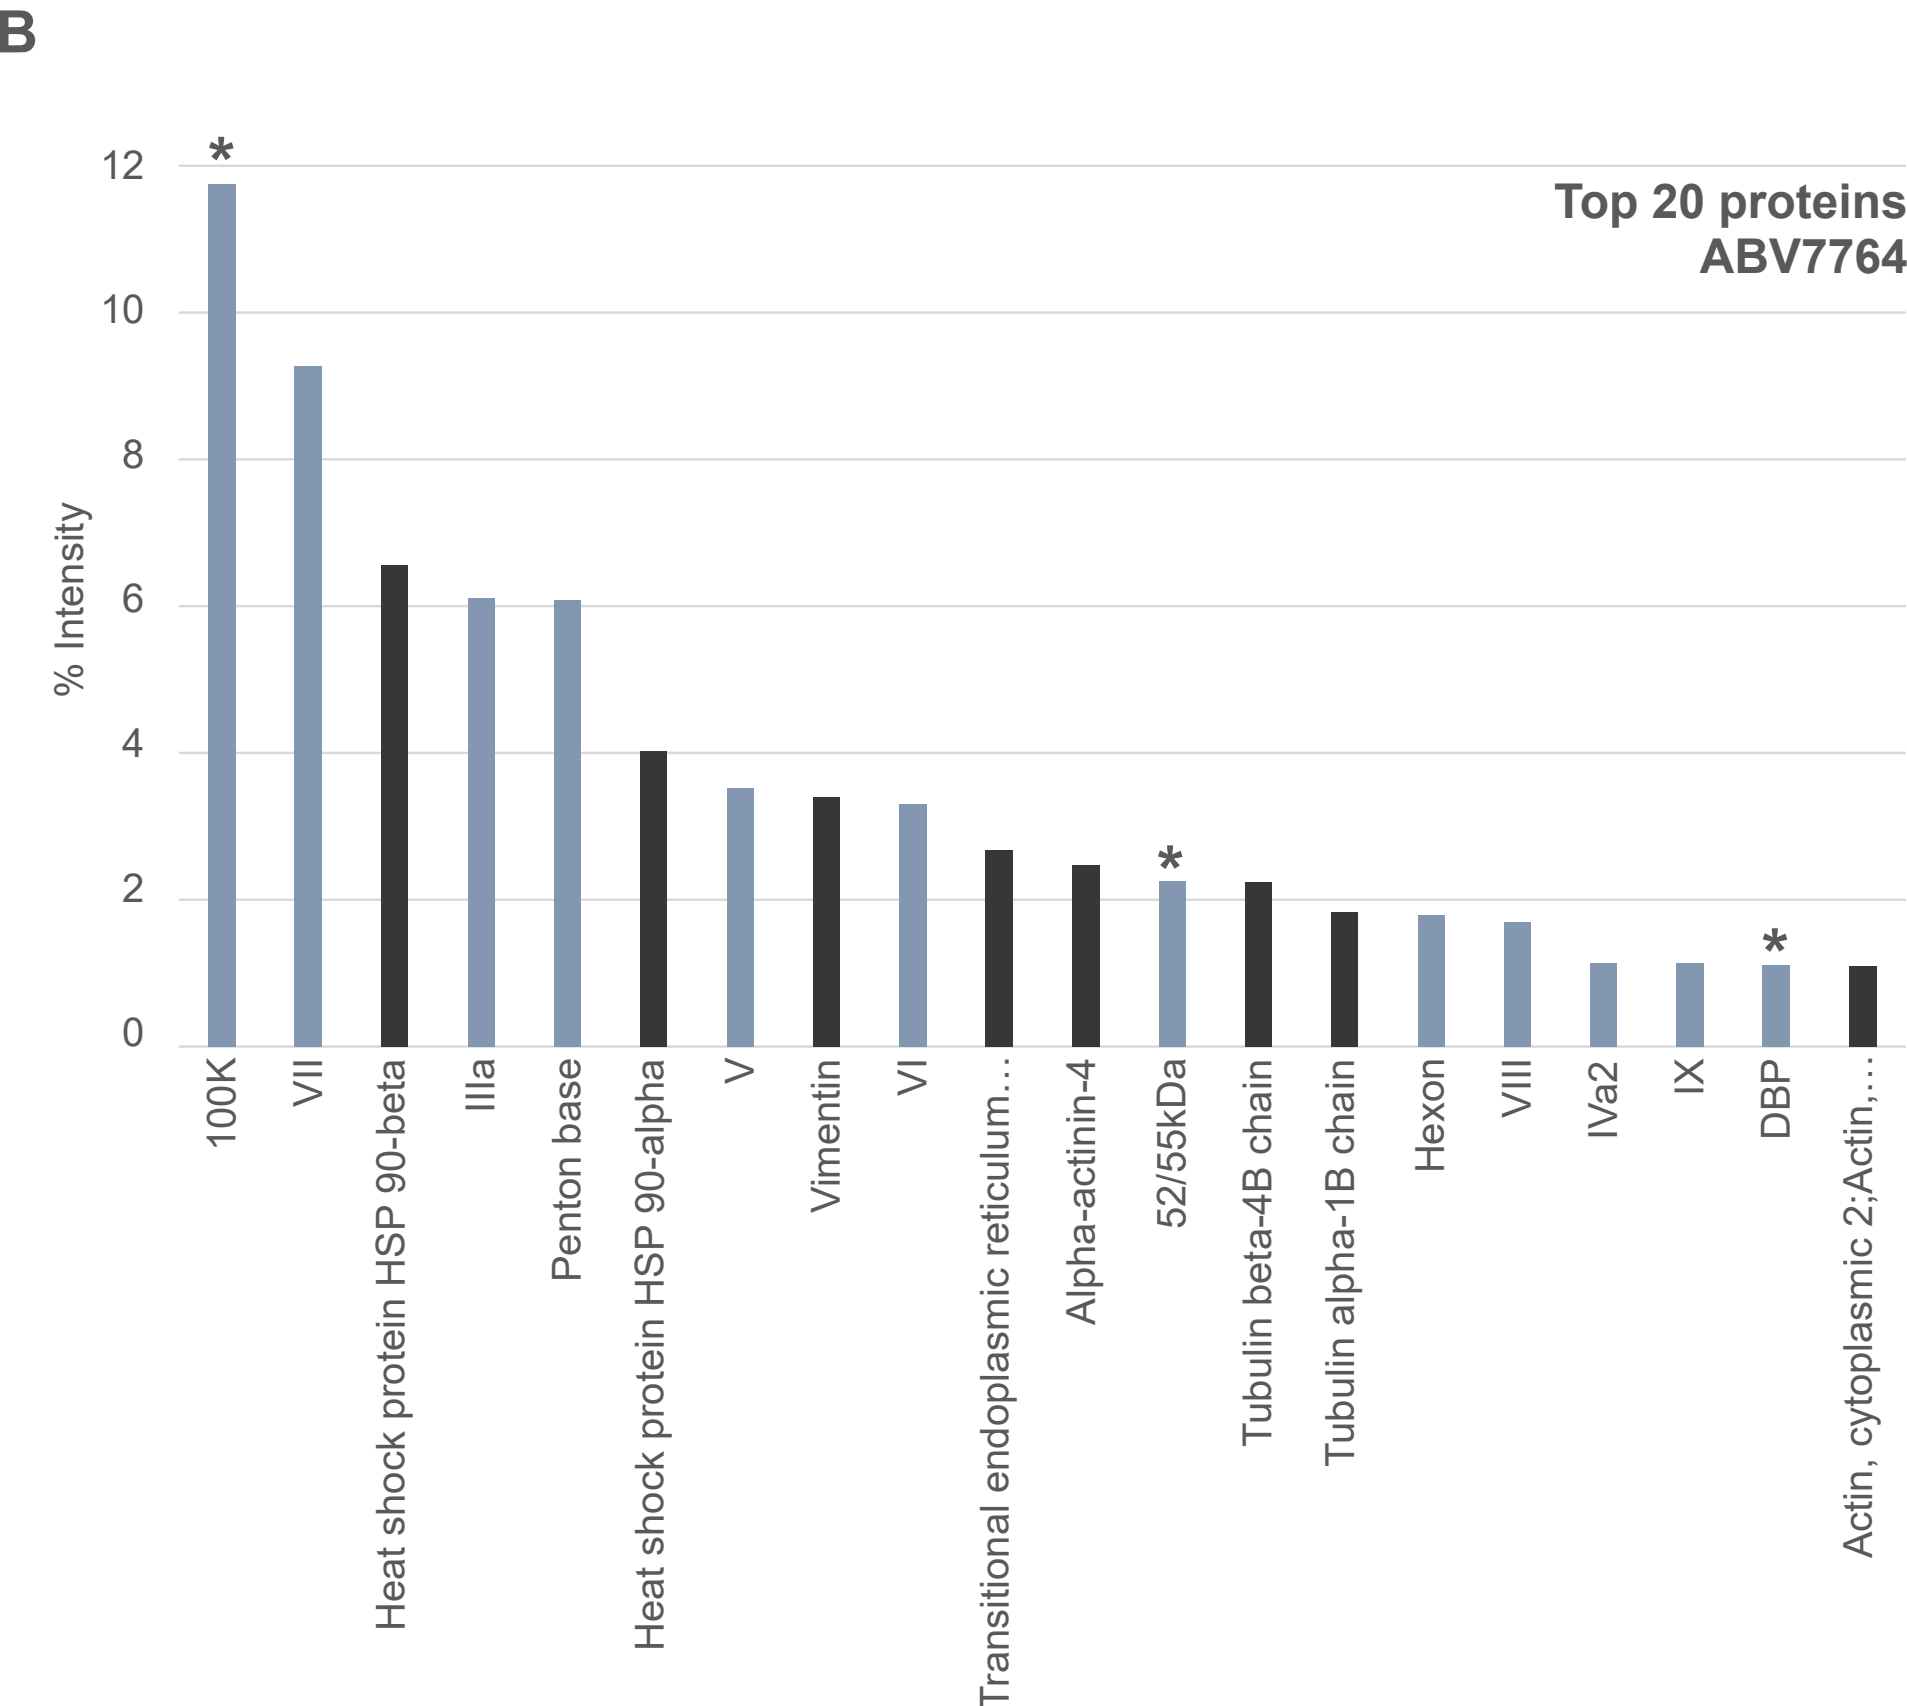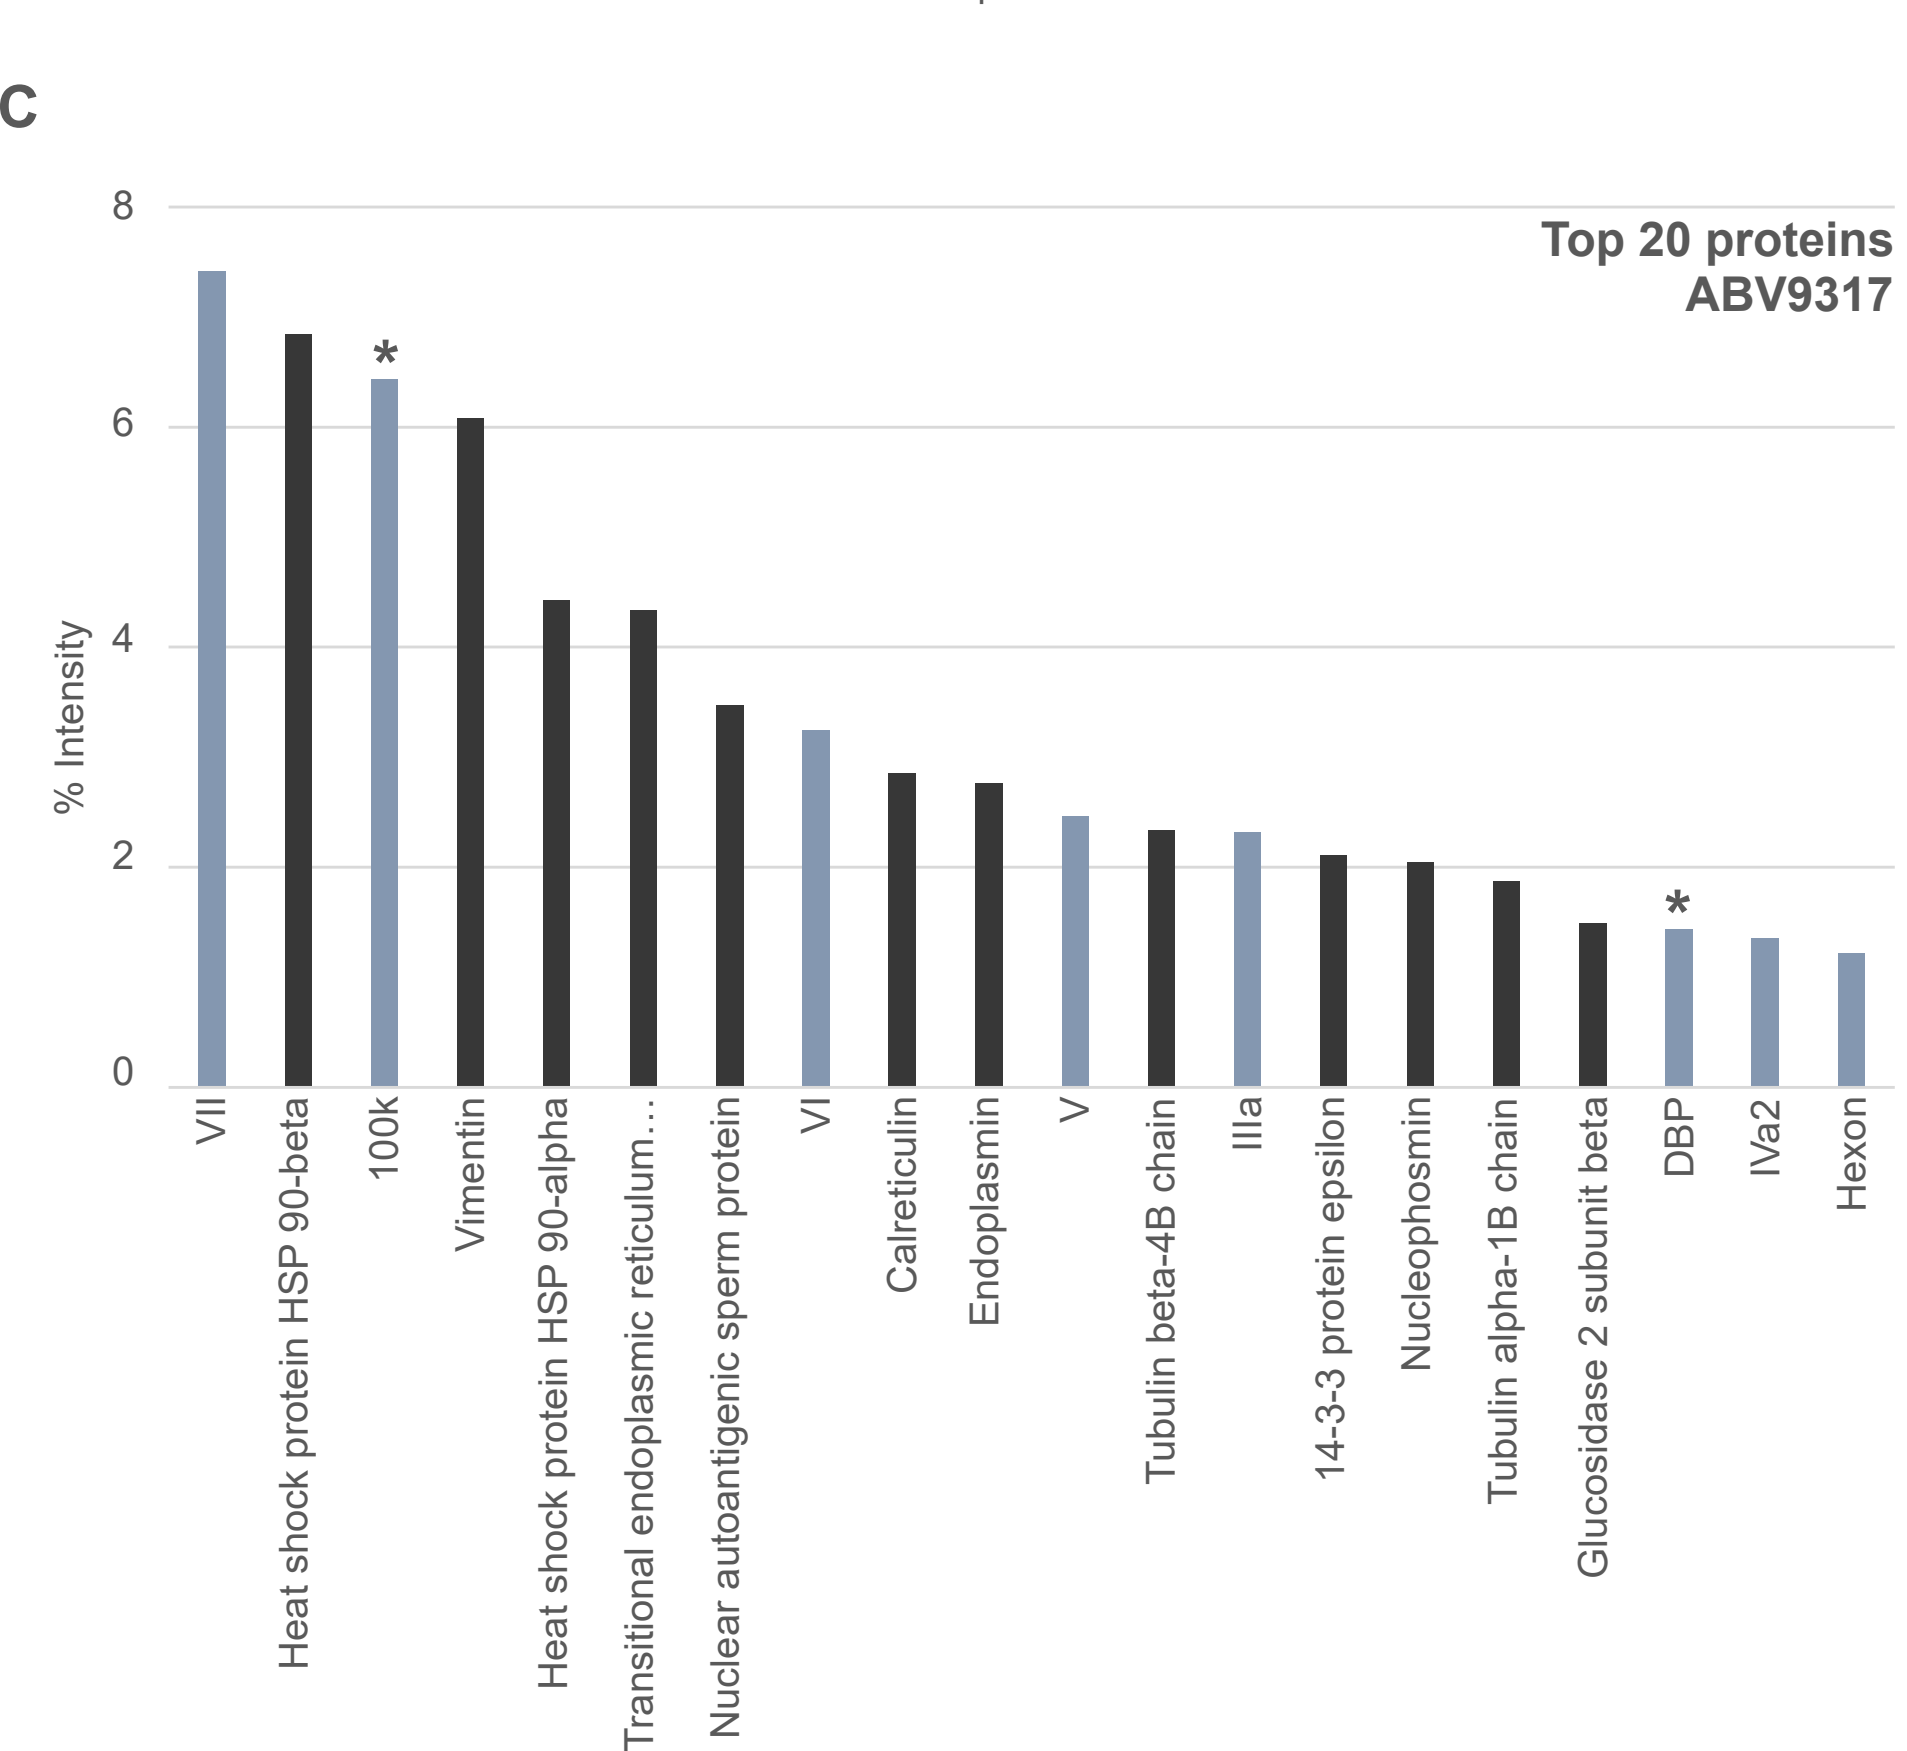

Supplement: supp [file elife-78513-supp-v1.zip]

UUIm ChAdOx1 nCov-19

**9.8%**

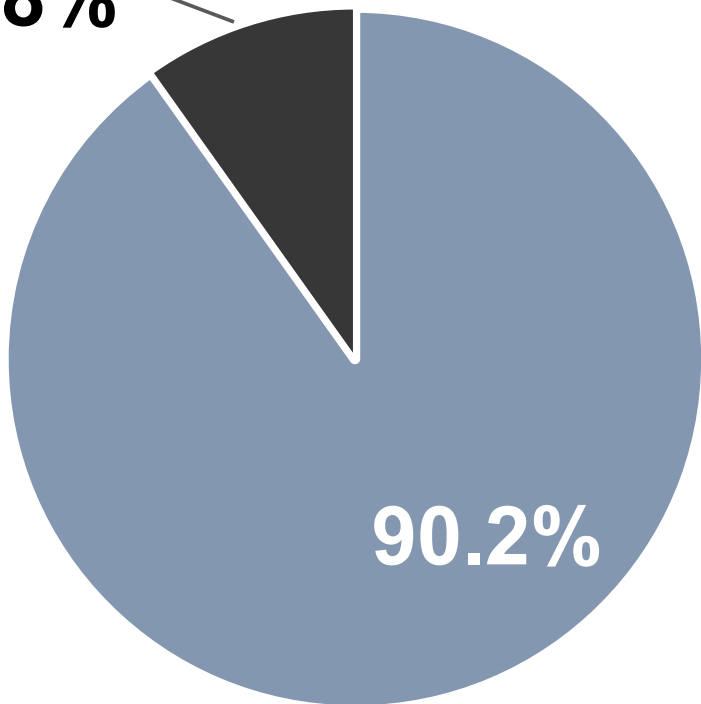

**90.2%**

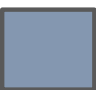

ChAdOx1 nCov-19

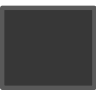

Homo sapiens

Supplement: supp [file elife-78513-supp-v1.zip]

# HAdV-C5-EGFP

**6.1%**

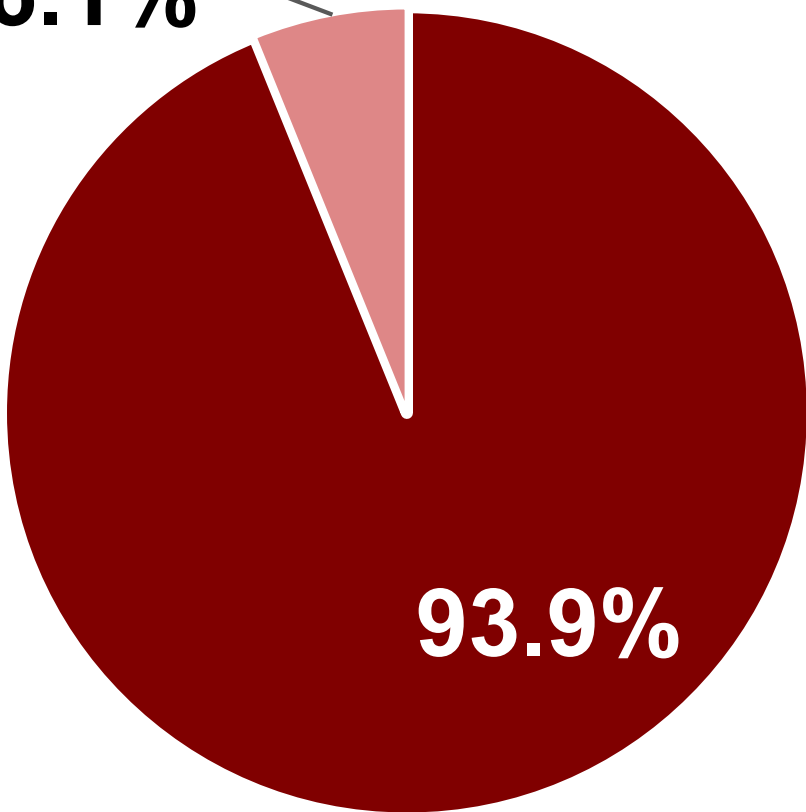

**93.9%**

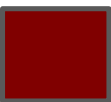

HAdV-C5

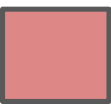

Homo sapiens

Supplement: supp [file elife-78513-supp-v1.zip]

# In-gel ABV5811

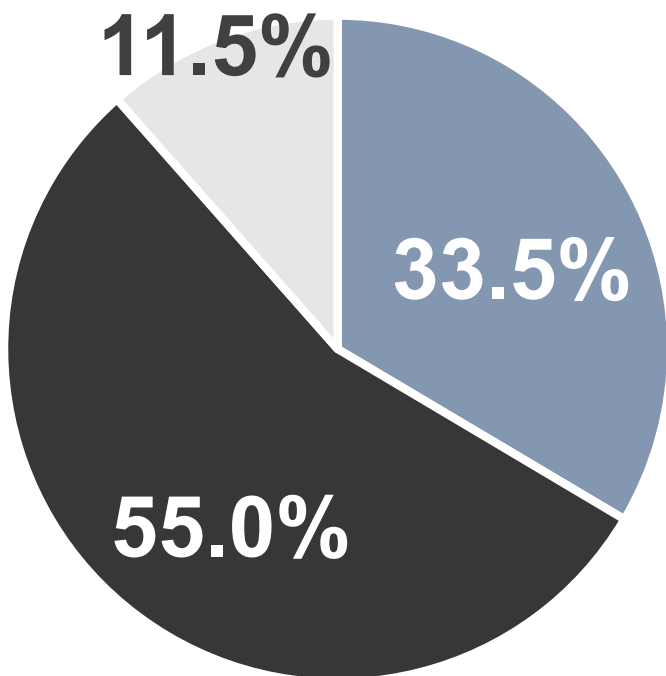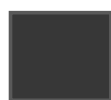

Homo sapiens

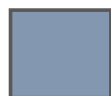

ChAdOx1 nCov-19

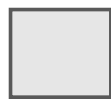

contaminants

Supplement: supp [file elife-78513-supp-v1.zip › elife_poa_e78513_Figure_2_figure_supplement_1.pdf]
